# Supplementary material for: Multi-Omic Analysis of CIC’s Functional Networks Reveals Novel Interaction Partners and a Potential Role in Mitotic Fidelity
Source: Cancers (Basel). 2023 May 17;15(10):2805. doi: 10.3390/cancers15102805 (PMC10216487; doi:10.3390/cancers15102805)
Supplement: Supplementary file 1 [file cancers-15-02805-s001.zip]

Archive with 14 entries (14 files):
- Supplemental_Table_S10_ms_ChIPseq.xlsx
- Supplemental_Table_S11_splicing.xlsx
- Supplemental_Table_S12_Whitfield_etal_genes.xlsx
- Supplemental_Table_S13_antibodies.xlsx
- Supplemental_Table_S1_coessential.xlsx
- Supplemental_Table_S2_DepMap_cell_lines.xlsx
- Supplemental_Table_S3_GI_HomDel.xlsx
- Supplemental_Table_S4_combined_gene_hit_list.xlsx
- Supplemental_Table_S5_IPMS_HEK.xlsx
- Supplemental_Table_S6_IPMS_NHA.xlsx
- Supplemental_table_S7_scRNA_seq.xlsx
- Supplemental_Table_S8_scRNAseq_gsea.xlsx
- Supplemental_Table_S9_NHA_ChIPseq.xlsx
- Supplementary_materials_merged.pdf
