# Supplementary material for: Multi-Omic Analysis of CIC’s Functional Networks Reveals Novel Interaction Partners and a Potential Role in Mitotic Fidelity
Source: Cancers (Basel). 2023 May 17;15(10):2805. doi: 10.3390/cancers15102805 (PMC10216487; doi:10.3390/cancers15102805)
Supplement: Supplementary file 1 [file cancers-15-02805-s001.zip › Supplemental_Table_S1_coessential.xlsx]

## Sheet: S1a (correlation coefficients)
Supplemental Table S1: CIC’s co-essential and co-expressed gene partners. a Pearson correlation coefficients were calculated between fitness scores of CIC and each targeted gene from DepMap KO screens. CIC co-essential genes were considered as those with a coefficient above the inflection point (0.178) and a BH-adjusted p-value < 0.05 (see Methods section for more detail).
GeneName_A	GeneName_B	Chromosome	Karyotype Band	Correlation_coefficient	P-value	BH-adjusted p-value (genome-wide)	Past_infection_point (genome-wide)	Rank (genome-wide)	Candidate (genome-wide)	BH-adjusted p-value (without chr 19)	Past_infection_point (without chr 19)	Rank (without chr 19)	Candidate (without chr 19)
CIC	CIC	19	q13.2	1	0	0	TRUE	1	TRUE	NA	NA	NA	NA
CIC	ERF	19	q13.2	0.303416	3.3439e-17	3.06518e-13	TRUE	2	TRUE	NA	NA	NA	NA
CIC	SPTBN4	19	q13.2	0.251833	3.74054e-12	1.85602e-08	TRUE	3	TRUE	NA	NA	NA	NA
CIC	SERTAD3	19	q13.2	0.25144	4.04958e-12	1.85602e-08	TRUE	4	TRUE	NA	NA	NA	NA
CIC	ITPKC	19	q13.2	0.249628	5.82742e-12	2.01882e-08	TRUE	5	TRUE	NA	NA	NA	NA
CIC	WDR87	19	q13.13	0.248999	6.60716e-12	2.01882e-08	TRUE	6	TRUE	NA	NA	NA	NA
CIC	CYP2S1	19	q13.2	0.242274	2.47843e-11	6.49101e-08	TRUE	7	TRUE	NA	NA	NA	NA
CIC	GNG8	19	q13.32	0.237837	5.80199e-11	1.11197e-07	TRUE	8	TRUE	NA	NA	NA	NA
CIC	PRX	19	q13.2	0.237526	6.15513e-11	1.11197e-07	TRUE	9	TRUE	NA	NA	NA	NA
CIC	ZNF155	19	q13.31	0.237125	6.64033e-11	1.11197e-07	TRUE	10	TRUE	NA	NA	NA	NA
CIC	FLT3LG	19	q13.33	0.23708	6.697e-11	1.11197e-07	TRUE	11	TRUE	NA	NA	NA	NA
CIC	ATXN1L	16	q22.2	0.23664	7.27848e-11	1.11197e-07	TRUE	12	TRUE	1.2372e-06	TRUE	1	TRUE
CIC	CNFN	19	q13.2	0.236184	7.93083e-11	1.11843e-07	TRUE	13	TRUE	NA	NA	NA	NA
CIC	BBC3	19	q13.32	0.23159	1.86765e-10	2.28264e-07	TRUE	14	TRUE	NA	NA	NA	NA
CIC	NCCRP1	19	q13.2	0.230305	2.3656e-10	2.71054e-07	TRUE	15	TRUE	NA	NA	NA	NA
CIC	CD37	19	q13.33	0.228644	3.20419e-10	3.45544e-07	TRUE	16	TRUE	NA	NA	NA	NA
CIC	ETHE1	19	q13.31	0.226185	7.09467e-10	6.84561e-07	TRUE	17	TRUE	NA	NA	NA	NA
CIC	RASA1	5	q14.3	0.224798	6.41224e-10	6.53086e-07	TRUE	18	TRUE	3.63317e-06	TRUE	2	TRUE
CIC	FFAR2	19	q13.12	0.221474	1.15606e-09	1.02716e-06	TRUE	19	TRUE	NA	NA	NA	NA
CIC	PRR19	19	q13.2	0.221374	1.17658e-09	1.02716e-06	TRUE	20	TRUE	NA	NA	NA	NA
CIC	RABAC1	19	q13.2	0.22096	1.26531e-09	1.05441e-06	TRUE	21	TRUE	NA	NA	NA	NA
CIC	TGFB1	19	q13.2	0.219973	1.5041e-09	1.1989e-06	TRUE	22	TRUE	NA	NA	NA	NA
CIC	GSK3A	19	q13.2	0.219101	1.75112e-09	1.33764e-06	TRUE	23	TRUE	NA	NA	NA	NA
CIC	PLEKHG2	19	q13.2	0.217818	2.18733e-09	1.60401e-06	TRUE	24	TRUE	NA	NA	NA	NA
CIC	ZNF224	19	q13.31	0.2177	3.08677e-09	2.17653e-06	TRUE	25	TRUE	NA	NA	NA	NA
CIC	DEDD2	19	q13.2	0.215509	3.25352e-09	2.20914e-06	TRUE	26	TRUE	NA	NA	NA	NA
CIC	MIA	19	q13.2	0.21455	3.83149e-09	2.50867e-06	TRUE	27	TRUE	NA	NA	NA	NA
CIC	JUND	19	p13.11	0.213959	4.23594e-09	2.67784e-06	TRUE	28	TRUE	NA	NA	NA	NA
CIC	ZNF461	19	q13.12	0.213121	4.8822e-09	2.98352e-06	TRUE	29	TRUE	NA	NA	NA	NA
CIC	FBXO27	19	q13.2	0.211744	6.15623e-09	3.59745e-06	TRUE	30	TRUE	NA	NA	NA	NA
CIC	KCTD15	19	q13.11	0.211626	6.2793e-09	3.59745e-06	TRUE	31	TRUE	NA	NA	NA	NA
CIC	ZNF780B	19	q13.2	0.210584	7.47518e-09	4.1528e-06	TRUE	32	TRUE	NA	NA	NA	NA
CIC	PINLYP	19	q13.31	0.210236	7.92259e-09	4.27191e-06	TRUE	33	TRUE	NA	NA	NA	NA
CIC	PHLDB3	19	q13.31	0.20923	9.36451e-09	4.90513e-06	TRUE	34	TRUE	NA	NA	NA	NA
CIC	TIMM50	19	q13.2	0.20781	1.18393e-08	6.02914e-06	TRUE	35	TRUE	NA	NA	NA	NA
CIC	UPK1A	19	q13.12	0.20571	1.66983e-08	8.27379e-06	TRUE	36	TRUE	NA	NA	NA	NA
CIC	SDHAF1	19	q13.12	0.205017	1.86892e-08	9.01654e-06	TRUE	37	TRUE	NA	NA	NA	NA
CIC	BECN1	17	q21.31	0.20361	2.34667e-08	1.10311e-05	TRUE	38	TRUE	9.97216e-05	TRUE	3	TRUE
CIC	PBX4	19	p13.11	0.203428	2.41667e-08	1.10762e-05	TRUE	39	TRUE	NA	NA	NA	NA
CIC	ARHGAP33	19	q13.12	0.20316	2.52292e-08	1.12811e-05	TRUE	40	TRUE	NA	NA	NA	NA
CIC	CNTD2	NA	NA	0.201103	3.50647e-08	1.53057e-05	TRUE	41	TRUE	NA	NA	NA	NA
CIC	BICRA	19	q13.33	0.200888	3.62826e-08	1.5469e-05	TRUE	42	TRUE	NA	NA	NA	NA
CIC	CCDC9	19	q13.32	0.200564	3.8198e-08	1.59155e-05	TRUE	43	TRUE	NA	NA	NA	NA
CIC	ALKBH7	19	p13.3	0.200078	4.12572e-08	1.68082e-05	TRUE	44	TRUE	NA	NA	NA	NA
CIC	LGALS16	19	q13.2	0.199371	4.61376e-08	1.83879e-05	TRUE	45	TRUE	NA	NA	NA	NA
CIC	SIRT2	19	q13.2	0.199174	6.24309e-08	2.15023e-05	TRUE	46	TRUE	NA	NA	NA	NA
CIC	ACP7	19	q13.2	0.198696	5.13075e-08	2.00132e-05	TRUE	47	TRUE	NA	NA	NA	NA
CIC	ZNF534	19	q13.41	0.198556	5.24508e-08	2.00329e-05	TRUE	48	TRUE	NA	NA	NA	NA
CIC	ZNF569	19	q13.12	0.198109	5.62625e-08	2.09943e-05	TRUE	49	TRUE	NA	NA	NA	NA
CIC	ZNF571	19	q13.12	0.197747	5.9545e-08	2.14047e-05	TRUE	50	TRUE	NA	NA	NA	NA
CIC	SULT2B1	19	q13.33	0.197572	6.11908e-08	2.15023e-05	TRUE	51	TRUE	NA	NA	NA	NA
CIC	LGALS14	19	q13.2	0.197352	6.33351e-08	2.15023e-05	TRUE	52	TRUE	NA	NA	NA	NA
CIC	SLC7A9	19	q13.11	0.195068	9.02785e-08	2.9751e-05	TRUE	53	TRUE	NA	NA	NA	NA
CIC	ERICH4	19	q13.2	0.195025	9.08775e-08	2.9751e-05	TRUE	54	TRUE	NA	NA	NA	NA
CIC	BRSK1	19	q13.42	0.194523	9.8179e-08	3.15775e-05	TRUE	55	TRUE	NA	NA	NA	NA
CIC	YIF1B	19	q13.2	0.194394	1.00147e-07	3.16551e-05	TRUE	56	TRUE	NA	NA	NA	NA
CIC	EXOC3L2	19	q13.32	0.194173	1.03607e-07	3.21938e-05	TRUE	57	TRUE	NA	NA	NA	NA
CIC	MPV17L2	19	p13.11	0.19263	1.31181e-07	4.00822e-05	TRUE	58	TRUE	NA	NA	NA	NA
CIC	LGI4	19	q13.12	0.19204	1.43498e-07	4.31271e-05	TRUE	59	TRUE	NA	NA	NA	NA
CIC	PPFIA3	19	q13.33	0.191753	1.49863e-07	4.43135e-05	TRUE	60	TRUE	NA	NA	NA	NA
CIC	FUZ	19	q13.33	0.190653	1.76983e-07	5.06975e-05	TRUE	61	TRUE	NA	NA	NA	NA
CIC	FXR1	3	q26.33	0.190202	1.89407e-07	5.1746e-05	TRUE	62	TRUE	0.000459935	TRUE	4	TRUE
CIC	TTC9B	19	q13.2	0.190174	1.90231e-07	5.1746e-05	TRUE	63	TRUE	NA	NA	NA	NA
CIC	ETV2	19	q13.12	0.19017	1.9033e-07	5.1746e-05	TRUE	64	TRUE	NA	NA	NA	NA
CIC	SHKBP1	19	q13.2	0.190114	1.91934e-07	5.1746e-05	TRUE	65	TRUE	NA	NA	NA	NA
CIC	ZNF566	19	q13.12	0.189587	2.07739e-07	5.51507e-05	TRUE	66	TRUE	NA	NA	NA	NA
CIC	PSG1	19	q13.2	0.189496	2.10579e-07	5.51507e-05	TRUE	67	TRUE	NA	NA	NA	NA
CIC	LILRB5	19	q13.42	0.189155	2.21618e-07	5.72242e-05	TRUE	68	TRUE	NA	NA	NA	NA
CIC	DYRK1B	19	q13.2	0.188874	2.95129e-07	7.32488e-05	TRUE	69	TRUE	NA	NA	NA	NA
CIC	SLC17A7	19	q13.33	0.187217	2.95664e-07	7.32488e-05	TRUE	70	TRUE	NA	NA	NA	NA
CIC	FXYD1	19	q13.12	0.186167	3.45198e-07	8.32699e-05	TRUE	71	TRUE	NA	NA	NA	NA
CIC	MAP4K1	19	q13.2	0.185173	3.9944e-07	9.38839e-05	TRUE	72	TRUE	NA	NA	NA	NA
CIC	ZNF226	19	q13.31	0.185006	4.09294e-07	9.49822e-05	TRUE	73	TRUE	NA	NA	NA	NA
CIC	ZNF790	19	q13.12	0.184791	4.22372e-07	9.67919e-05	TRUE	74	TRUE	NA	NA	NA	NA
CIC	SPPL3	12	q24.31	0.184366	4.49381e-07	0.00010171	TRUE	75	TRUE	0.000694416	TRUE	5	TRUE
CIC	PEPD	19	q13.11	0.183377	5.18887e-07	0.000116009	TRUE	76	TRUE	NA	NA	NA	NA
CIC	NFYB	12	q23.3	0.183133	6.76506e-07	0.000142556	TRUE	77	TRUE	0.000821375	TRUE	6	TRUE
CIC	KANK1	9	p24.3	0.183104	5.39803e-07	0.000119231	TRUE	78	TRUE	0.000764631	TRUE	7	TRUE
CIC	C19orf12	19	q12	0.183011	5.47113e-07	0.000119407	TRUE	79	TRUE	NA	NA	NA	NA
CIC	DUSP6	12	q21.33	0.181858	6.46074e-07	0.000139347	TRUE	80	TRUE	0.000821375	TRUE	8	TRUE
CIC	GRAMD1A	19	q13.11	0.181735	6.57586e-07	0.000140181	TRUE	81	TRUE	NA	NA	NA	NA
CIC	PLA2G4C	19	q13.33	0.181093	7.20986e-07	0.000150203	TRUE	82	TRUE	NA	NA	NA	NA
CIC	MEX3D	19	p13.3	0.180453	7.90015e-07	0.000162734	TRUE	83	TRUE	NA	NA	NA	NA
CIC	ZCCHC12	X	q24	0.179845	2.24389e-06	0.000348621	TRUE	84	TRUE	0.00165833	TRUE	9	TRUE
CIC	ASPDH	19	q13.33	0.179708	8.78421e-07	0.000176968	TRUE	85	TRUE	NA	NA	NA	NA
CIC	KEAP1	19	p13.2	0.1787	1.0132e-06	0.000199732	TRUE	86	TRUE	NA	NA	NA	NA
CIC	SYCN	19	q13.2	0.178533	1.03736e-06	0.000202317	TRUE	87	TRUE	NA	NA	NA	NA
CIC	CD320	19	p13.2	0.177783	1.15296e-06	0.00021791	TRUE	88	TRUE	NA	NA	NA	NA
CIC	C19orf54	19	q13.2	0.177358	1.22378e-06	0.000228934	FALSE	89	FALSE	NA	NA	NA	NA
CIC	BCL2L12	19	q13.33	0.177062	1.27559e-06	0.000236215	FALSE	90	FALSE	NA	NA	NA	NA
CIC	ZNF345	19	q13.12	0.176246	1.42944e-06	0.000259465	FALSE	91	FALSE	NA	NA	NA	NA
CIC	VSIG10L	19	q13.41	0.176127	1.45332e-06	0.000261213	FALSE	92	FALSE	NA	NA	NA	NA
CIC	TEAD2	19	q13.33	0.175969	1.48574e-06	0.000262683	FALSE	93	FALSE	NA	NA	NA	NA
CIC	FFAR3	19	q13.12	0.175948	1.49016e-06	0.000262683	FALSE	94	FALSE	NA	NA	NA	NA
CIC	PAFAH1B3	19	q13.2	0.175759	1.52964e-06	0.000267075	FALSE	95	FALSE	NA	NA	NA	NA
CIC	ZNF230	19	q13.31	0.175661	1.55066e-06	0.00026819	FALSE	96	FALSE	NA	NA	NA	NA
CIC	CDKN1B	12	p13.1	0.175558	1.57301e-06	0.000268936	FALSE	97	FALSE	0.0013369	TRUE	10	TRUE
CIC	FPR3	19	q13.41	0.175507	1.58431e-06	0.000268936	FALSE	98	FALSE	NA	NA	NA	NA
CIC	RTN2	19	q13.32	0.175368	1.61494e-06	0.000271621	FALSE	99	FALSE	NA	NA	NA	NA
CIC	C5AR2	19	q13.32	0.175199	1.65334e-06	0.000275551	FALSE	100	FALSE	NA	NA	NA	NA
CIC	ZNF565	19	q13.12	0.175098	1.67653e-06	0.0002769	FALSE	101	FALSE	NA	NA	NA	NA
CIC	CAPNS1	19	q13.12	0.174078	1.93009e-06	0.000313136	FALSE	102	FALSE	NA	NA	NA	NA
CIC	SRRM5	19	q13.31	0.173569	2.06981e-06	0.000332858	FALSE	103	FALSE	NA	NA	NA	NA
CIC	KCNN4	19	q13.31	0.173185	2.18188e-06	0.00034671	FALSE	104	FALSE	NA	NA	NA	NA
CIC	DMPK	19	q13.32	0.173145	2.19377e-06	0.00034671	FALSE	105	FALSE	NA	NA	NA	NA
CIC	RASEF	9	q21.32	0.172251	2.47848e-06	0.000381832	FALSE	106	FALSE	0.00175539	TRUE	11	TRUE
CIC	VN1R4	19	q13.42	0.171652	2.68878e-06	0.000408708	FALSE	107	FALSE	NA	NA	NA	NA
CIC	SYNE4	19	q13.12	0.171609	2.70467e-06	0.000408708	FALSE	108	FALSE	NA	NA	NA	NA
CIC	TARM1	19	q13.42	0.171505	2.74295e-06	0.000408708	FALSE	109	FALSE	NA	NA	NA	NA
CIC	RSPH6A	19	q13.32	0.171478	2.753e-06	0.000408708	FALSE	110	FALSE	NA	NA	NA	NA
CIC	CYP2B6	19	q13.2	0.171448	2.7644e-06	0.000408708	FALSE	111	FALSE	NA	NA	NA	NA
CIC	IGFLR1	19	q13.12	0.171293	2.82296e-06	0.000414027	FALSE	112	FALSE	NA	NA	NA	NA
CIC	LSR	19	q13.12	0.17108	2.90554e-06	0.000422756	FALSE	113	FALSE	NA	NA	NA	NA
CIC	SHISA7	19	q13.42	0.170973	2.94772e-06	0.00042379	FALSE	114	FALSE	NA	NA	NA	NA
CIC	RCN3	19	q13.33	0.170945	2.95888e-06	0.00042379	FALSE	115	FALSE	NA	NA	NA	NA
CIC	PNMA8B	19	q13.32	0.170786	3.02326e-06	0.000429655	FALSE	116	FALSE	NA	NA	NA	NA
CIC	VSTM2B	19	q12	0.170683	3.06548e-06	0.000432304	FALSE	117	FALSE	NA	NA	NA	NA
CIC	HIF1A	14	q23.2	0.170467	3.15648e-06	0.000441739	FALSE	118	FALSE	0.00209079	TRUE	12	TRUE
CIC	GTF2F1	19	p13.3	0.170409	3.88469e-06	0.00051984	FALSE	119	FALSE	NA	NA	NA	NA
CIC	PCDHA2	5	q31.3	0.170089	3.32106e-06	0.000457782	FALSE	120	FALSE	0.00209079	TRUE	13	TRUE
CIC	COQ8B	19	q13.2	0.169574	3.55899e-06	0.000483627	FALSE	121	FALSE	NA	NA	NA	NA
CIC	PRPF31	19	q13.42	0.169496	4.38271e-06	0.000569846	FALSE	122	FALSE	NA	NA	NA	NA
CIC	CLEC4M	19	p13.2	0.169116	3.7839e-06	0.000510076	FALSE	123	FALSE	NA	NA	NA	NA
CIC	CGB2	19	q13.33	0.168426	4.14952e-06	0.000551254	FALSE	124	FALSE	NA	NA	NA	NA
CIC	WFIKKN1	16	p13.3	0.168177	4.28935e-06	0.000565732	FALSE	125	FALSE	0.00246737	TRUE	14	TRUE
CIC	TDRD12	19	q13.11	0.168082	5.27617e-06	0.000649182	FALSE	126	FALSE	NA	NA	NA	NA
CIC	PITPNM3	17	p13.1	0.168042	4.367e-06	0.000569846	FALSE	127	FALSE	0.00246737	TRUE	15	TRUE
CIC	TBXA2R	19	p13.3	0.167766	4.52989e-06	0.000580744	FALSE	128	FALSE	NA	NA	NA	NA
CIC	APOE	19	q13.32	0.16744	4.73023e-06	0.000597263	FALSE	129	FALSE	NA	NA	NA	NA
CIC	ARMC6	19	p13.11	0.167398	4.75647e-06	0.000597263	FALSE	130	FALSE	NA	NA	NA	NA
CIC	ZNF433	19	p13.2	0.167025	4.99703e-06	0.000623201	FALSE	131	FALSE	NA	NA	NA	NA
CIC	FAM71E1	NA	NA	0.166954	5.04418e-06	0.000624831	FALSE	132	FALSE	NA	NA	NA	NA
CIC	NANOS2	19	q13.32	0.166109	5.63802e-06	0.000680012	FALSE	133	FALSE	NA	NA	NA	NA
CIC	PLEKHF1	19	q12	0.166016	5.70753e-06	0.000683897	FALSE	134	FALSE	NA	NA	NA	NA
CIC	PTPRH	19	q13.42	0.165589	6.03624e-06	0.000713084	FALSE	135	FALSE	NA	NA	NA	NA
CIC	ZNF841	19	q13.41	0.165563	6.05669e-06	0.000713084	FALSE	136	FALSE	NA	NA	NA	NA
CIC	SLC2A4RG	20	q13.33	0.165549	6.06781e-06	0.000713084	FALSE	137	FALSE	0.00294688	TRUE	16	TRUE
CIC	PTOV1	19	q13.33	0.165303	6.26619e-06	0.000731708	FALSE	138	FALSE	NA	NA	NA	NA
CIC	CCDC114	NA	NA	0.165002	6.51778e-06	0.000756268	FALSE	139	FALSE	NA	NA	NA	NA
CIC	BLVRB	19	q13.2	0.164875	6.62664e-06	0.000764064	FALSE	140	FALSE	NA	NA	NA	NA
CIC	CEACAM4	19	q13.2	0.164774	6.71431e-06	0.000769334	FALSE	141	FALSE	NA	NA	NA	NA
CIC	ZNF575	19	q13.31	0.164639	6.83396e-06	0.000778181	FALSE	142	FALSE	NA	NA	NA	NA
CIC	BCL3	19	q13.32	0.164041	7.38679e-06	0.000829835	FALSE	143	FALSE	NA	NA	NA	NA
CIC	CEACAM19	19	q13.31	0.164027	7.40003e-06	0.000829835	FALSE	144	FALSE	NA	NA	NA	NA
CIC	TMEM238	19	q13.42	0.164001	7.42487e-06	0.000829835	FALSE	145	FALSE	NA	NA	NA	NA
CIC	ADGRE5	19	p13.12	0.163956	7.46865e-06	0.000829835	FALSE	146	FALSE	NA	NA	NA	NA
CIC	GSR	8	p12	0.163082	8.36317e-06	0.000923626	FALSE	147	FALSE	0.00394881	TRUE	17	TRUE
CIC	NECTIN2	19	q13.32	0.162693	8.79327e-06	0.000965311	FALSE	148	FALSE	NA	NA	NA	NA
CIC	C5AR1	19	q13.32	0.162474	9.0445e-06	0.000981538	FALSE	149	FALSE	NA	NA	NA	NA
CIC	TULP2	19	q13.33	0.162235	9.32709e-06	0.00100584	FALSE	150	FALSE	NA	NA	NA	NA
CIC	YJU2	19	p13.3	0.161667	1.00312e-05	0.0010692	FALSE	151	FALSE	NA	NA	NA	NA
CIC	ZNF235	19	q13.31	0.161445	1.03206e-05	0.00109368	FALSE	152	FALSE	NA	NA	NA	NA
CIC	LGALS13	19	q13.2	0.161378	1.04099e-05	0.00109681	FALSE	153	FALSE	NA	NA	NA	NA
CIC	GIPR	19	q13.32	0.161022	1.08938e-05	0.00114124	FALSE	154	FALSE	NA	NA	NA	NA
CIC	DKKL1	19	q13.33	0.16096	1.09796e-05	0.00114368	FALSE	155	FALSE	NA	NA	NA	NA
CIC	PANK2	20	p13	0.160289	1.19577e-05	0.00123157	FALSE	156	FALSE	0.00508142	TRUE	18	TRUE
CIC	ZNF221	19	q13.31	0.159962	1.24654e-05	0.0012696	FALSE	157	FALSE	NA	NA	NA	NA
CIC	ZNF45	19	q13.31	0.158941	1.41795e-05	0.00143621	FALSE	158	FALSE	NA	NA	NA	NA
CIC	TMEM205	19	p13.2	0.15868	1.46533e-05	0.00147604	FALSE	159	FALSE	NA	NA	NA	NA
CIC	VIRMA	8	q22.1	0.15841	1.51583e-05	0.00151685	FALSE	160	FALSE	0.00601805	TRUE	19	TRUE
CIC	SNAI1	20	q13.13	0.158007	1.59444e-05	0.00157156	FALSE	161	FALSE	0.00602275	TRUE	20	TRUE
CIC	BCAT2	19	q13.33	0.157774	1.94969e-05	0.00178718	FALSE	162	FALSE	NA	NA	NA	NA
CIC	ASF1B	19	p13.12	0.157716	1.96356e-05	0.00179094	FALSE	163	FALSE	NA	NA	NA	NA
CIC	ACTL9	19	p13.2	0.157414	1.71719e-05	0.00166985	FALSE	164	FALSE	NA	NA	NA	NA
CIC	ARL6IP4	12	q24.31	0.157394	1.72149e-05	0.00166985	FALSE	165	FALSE	0.0061361	TRUE	21	TRUE
CIC	TSPAN31	12	q14.1	0.157033	1.80063e-05	0.00171987	FALSE	166	FALSE	0.0061361	TRUE	22	TRUE
CIC	ACOT4	14	q24.3	0.157014	1.80495e-05	0.00171987	FALSE	167	FALSE	0.0061361	TRUE	23	TRUE
CIC	NCAN	19	p13.11	0.156962	1.81657e-05	0.00171987	FALSE	168	FALSE	NA	NA	NA	NA
CIC	FKBP8	19	p13.11	0.156947	1.81997e-05	0.00171987	FALSE	169	FALSE	NA	NA	NA	NA
CIC	ARHGAP35	19	q13.32	0.156943	2.15875e-05	0.00190708	FALSE	170	FALSE	NA	NA	NA	NA
CIC	MVB12A	19	p13.11	0.156862	1.83924e-05	0.00172917	FALSE	171	FALSE	NA	NA	NA	NA
CIC	ATP1A3	19	q13.2	0.156603	1.89946e-05	0.00177668	FALSE	172	FALSE	NA	NA	NA	NA
CIC	GLE1	9	q34.11	0.156542	1.91401e-05	0.0017812	FALSE	173	FALSE	0.0063793	TRUE	24	TRUE
CIC	CCDC97	19	q13.2	0.156498	1.9245e-05	0.00178191	FALSE	174	FALSE	NA	NA	NA	NA
CIC	PAWR	12	q21.2	0.156474	2.28615e-05	0.00198635	FALSE	175	FALSE	0.00747306	TRUE	25	TRUE
CIC	LYPD4	19	q13.2	0.156431	1.94035e-05	0.00178718	FALSE	176	FALSE	NA	NA	NA	NA
CIC	KLC3	19	q13.32	0.156253	1.98386e-05	0.0018005	FALSE	177	FALSE	NA	NA	NA	NA
CIC	BLOC1S3	19	q13.32	0.155952	2.05896e-05	0.00185945	FALSE	178	FALSE	NA	NA	NA	NA
CIC	HIPK4	19	q13.2	0.155902	2.07179e-05	0.00186186	FALSE	179	FALSE	NA	NA	NA	NA
CIC	SYMPK	19	q13.32	0.155861	2.08225e-05	0.00186214	FALSE	180	FALSE	NA	NA	NA	NA
CIC	FAM187B	19	q13.12	0.155818	2.09346e-05	0.00186308	FALSE	181	FALSE	NA	NA	NA	NA
CIC	CXCL17	19	q13.2	0.155551	2.1637e-05	0.00190708	FALSE	182	FALSE	NA	NA	NA	NA
CIC	ZNF225	19	q13.31	0.15515	2.27311e-05	0.00198635	FALSE	183	FALSE	NA	NA	NA	NA
CIC	COX6B1	19	q13.12	0.155116	2.28252e-05	0.00198635	FALSE	184	FALSE	NA	NA	NA	NA
CIC	DDX39B	6	p21.33	0.154661	2.4139e-05	0.00207766	FALSE	185	FALSE	0.00759843	TRUE	26	TRUE
CIC	CEACAM3	19	q13.2	0.154572	2.44022e-05	0.0020905	FALSE	186	FALSE	NA	NA	NA	NA
CIC	CABP5	19	q13.33	0.154399	2.49265e-05	0.00211548	FALSE	187	FALSE	NA	NA	NA	NA
CIC	SLC1A5	19	q13.32	0.154362	2.50401e-05	0.00211548	FALSE	188	FALSE	NA	NA	NA	NA
CIC	LIPE	19	q13.2	0.154096	2.58687e-05	0.00216553	FALSE	189	FALSE	NA	NA	NA	NA
CIC	PCDHGB6	5	q31.3	0.153951	2.63288e-05	0.00219231	FALSE	190	FALSE	0.00772299	TRUE	27	TRUE
CIC	ZGPAT	20	q13.33	0.153884	2.65474e-05	0.00219231	FALSE	191	FALSE	0.00772299	TRUE	28	TRUE
CIC	PLD3	19	q13.2	0.153876	2.65714e-05	0.00219231	FALSE	192	FALSE	NA	NA	NA	NA
CIC	ATP6V0C	16	p13.3	0.153804	2.68065e-05	0.00219231	FALSE	193	FALSE	0.00772299	TRUE	29	TRUE
CIC	KPTN	19	q13.32	0.1538	2.68192e-05	0.00219231	FALSE	194	FALSE	NA	NA	NA	NA
CIC	EID2	19	q13.2	0.153774	2.69061e-05	0.00219231	FALSE	195	FALSE	NA	NA	NA	NA
CIC	ZNF440	19	p13.2	0.153379	2.82303e-05	0.00229003	FALSE	196	FALSE	NA	NA	NA	NA
CIC	BCL9L	11	q23.3	0.153288	2.85452e-05	0.00229161	FALSE	197	FALSE	0.00795944	TRUE	30	TRUE
CIC	NFKBIB	19	q13.2	0.153283	2.85635e-05	0.00229161	FALSE	198	FALSE	NA	NA	NA	NA
CIC	CACTIN	19	p13.3	0.153238	2.87199e-05	0.00229161	FALSE	199	FALSE	NA	NA	NA	NA
CIC	ZNF585B	19	q13.12	0.153131	2.90944e-05	0.00230457	FALSE	200	FALSE	NA	NA	NA	NA
CIC	UBQLNL	11	p15.4	0.152947	2.97526e-05	0.00234101	FALSE	201	FALSE	0.00795944	TRUE	31	TRUE
CIC	FOSB	19	q13.32	0.152743	3.04976e-05	0.00237443	FALSE	202	FALSE	NA	NA	NA	NA
CIC	SPRED3	19	q13.2	0.152692	3.06894e-05	0.00237443	FALSE	203	FALSE	NA	NA	NA	NA
CIC	SERTAD1	19	q13.2	0.152646	3.08606e-05	0.00237443	FALSE	204	FALSE	NA	NA	NA	NA
CIC	CEACAM5	19	q13.2	0.152634	3.09051e-05	0.00237443	FALSE	205	FALSE	NA	NA	NA	NA
CIC	ANKLE1	19	p13.11	0.15262	3.09546e-05	0.00237443	FALSE	206	FALSE	NA	NA	NA	NA
CIC	FOSL2	2	p23.2	0.152546	3.12348e-05	0.00237605	FALSE	207	FALSE	0.00795944	TRUE	32	TRUE
CIC	LYPD5	19	q13.31	0.152289	3.2222e-05	0.00241769	FALSE	208	FALSE	NA	NA	NA	NA
CIC	ATG7	3	p25.3	0.152266	3.23098e-05	0.00241769	FALSE	209	FALSE	0.00795944	TRUE	33	TRUE
CIC	SPIB	19	q13.33	0.152191	3.26065e-05	0.00242998	FALSE	210	FALSE	NA	NA	NA	NA
CIC	TMEM143	19	q13.33	0.15213	3.28455e-05	0.00243788	FALSE	211	FALSE	NA	NA	NA	NA
CIC	ELK1	X	p11.23	0.151996	5.81141e-05	0.00355135	FALSE	212	FALSE	0.0105088	TRUE	34	TRUE
CIC	EML2	19	q13.32	0.151966	3.35015e-05	0.00247655	FALSE	213	FALSE	NA	NA	NA	NA
CIC	PLVAP	19	p13.11	0.151898	3.3778e-05	0.00248695	FALSE	214	FALSE	NA	NA	NA	NA
CIC	NFXL1	4	p12	0.151799	3.41846e-05	0.00250683	FALSE	215	FALSE	0.00830101	TRUE	35	TRUE
CIC	CLC	19	q13.2	0.151656	3.47757e-05	0.00254001	FALSE	216	FALSE	NA	NA	NA	NA
CIC	CNOT3	19	q13.42	0.151388	3.59171e-05	0.00260264	FALSE	217	FALSE	NA	NA	NA	NA
CIC	KLK2	19	q13.33	0.151235	3.65829e-05	0.00262694	FALSE	218	FALSE	NA	NA	NA	NA
CIC	DIABLO	12	q24.31	0.151222	3.66422e-05	0.00262694	FALSE	219	FALSE	0.00847313	TRUE	36	TRUE
CIC	ZNF320	19	q13.41	0.151212	3.66823e-05	0.00262694	FALSE	220	FALSE	NA	NA	NA	NA
CIC	PIK3C3	18	q12.3	0.151029	3.75e-05	0.00265439	FALSE	221	FALSE	0.00847313	TRUE	37	TRUE
CIC	EVI5L	19	p13.2	0.150802	3.85321e-05	0.0026896	FALSE	222	FALSE	NA	NA	NA	NA
CIC	CYTH2	19	q13.33	0.150795	3.85627e-05	0.0026896	FALSE	223	FALSE	NA	NA	NA	NA
CIC	ZNF382	19	q13.12	0.15046	4.0139e-05	0.00278738	FALSE	224	FALSE	NA	NA	NA	NA
CIC	IFI30	19	p13.11	0.150057	4.21196e-05	0.00290293	FALSE	225	FALSE	NA	NA	NA	NA
CIC	C19orf47	19	q13.2	0.149962	4.25983e-05	0.00292492	FALSE	226	FALSE	NA	NA	NA	NA
CIC	UBE2M	19	q13.43	0.14981	4.33771e-05	0.00296729	FALSE	227	FALSE	NA	NA	NA	NA
CIC	CYP2A7	19	q13.2	0.149764	4.36147e-05	0.00297245	FALSE	228	FALSE	NA	NA	NA	NA
CIC	WDR88	19	q13.11	0.149658	4.41649e-05	0.0029988	FALSE	229	FALSE	NA	NA	NA	NA
CIC	FAM98C	19	q13.2	0.149567	4.46458e-05	0.00302027	FALSE	230	FALSE	NA	NA	NA	NA
CIC	WDR70	5	p13.2	0.149233	4.6454e-05	0.00313103	FALSE	231	FALSE	0.00999525	TRUE	38	TRUE
CIC	ZNF607	19	q13.12	0.149187	4.67084e-05	0.00313665	FALSE	232	FALSE	NA	NA	NA	NA
CIC	ZNF160	19	q13.42	0.149135	4.69947e-05	0.00314436	FALSE	233	FALSE	NA	NA	NA	NA
CIC	PHF8	X	p11.22	0.148848	9.43518e-05	0.00516344	FALSE	234	FALSE	0.0140667	TRUE	39	TRUE
CIC	ZNF227	19	q13.31	0.148798	4.89075e-05	0.00326044	FALSE	235	FALSE	NA	NA	NA	NA
CIC	APLP1	19	q13.12	0.148708	4.94322e-05	0.00327163	FALSE	236	FALSE	NA	NA	NA	NA
CIC	DPF1	19	q13.2	0.148651	5.80117e-05	0.00355135	FALSE	237	FALSE	NA	NA	NA	NA
CIC	PSPC1	13	q12.11	0.14861	5.00037e-05	0.00328573	FALSE	238	FALSE	0.0103654	TRUE	40	TRUE
CIC	GRIK5	19	q13.2	0.148294	5.19055e-05	0.00337441	FALSE	239	FALSE	NA	NA	NA	NA
CIC	NEDD1	12	q23.1	0.148209	5.24299e-05	0.00339646	FALSE	240	FALSE	0.0103685	TRUE	41	TRUE
CIC	FOXA1	14	q21.1	0.148126	5.29424e-05	0.00341371	FALSE	241	FALSE	0.0103685	TRUE	42	TRUE
CIC	ZNF284	19	q13.31	0.147902	5.43569e-05	0.00346859	FALSE	242	FALSE	NA	NA	NA	NA
CIC	OR7A5	19	p13.12	0.147862	5.46097e-05	0.00346859	FALSE	243	FALSE	NA	NA	NA	NA
CIC	DACT3	19	q13.32	0.147825	5.48504e-05	0.00346859	FALSE	244	FALSE	NA	NA	NA	NA
CIC	WIPF2	17	q21.2	0.147717	5.55514e-05	0.00349137	FALSE	245	FALSE	0.0104272	TRUE	43	TRUE
CIC	CD22	19	q13.12	0.147708	5.5609e-05	0.00349137	FALSE	246	FALSE	NA	NA	NA	NA
CIC	ZFAND5	9	q21.13	0.147675	5.58225e-05	0.00349281	FALSE	247	FALSE	0.0104272	TRUE	44	TRUE
CIC	NAPB	20	p11.21	0.14758	5.64507e-05	0.0035201	FALSE	248	FALSE	0.0104299	TRUE	45	TRUE
CIC	RFX1	19	p13.12	0.147497	5.7001e-05	0.00354237	FALSE	249	FALSE	NA	NA	NA	NA
CIC	LIN37	19	q13.12	0.147393	5.77029e-05	0.00355135	FALSE	250	FALSE	NA	NA	NA	NA
CIC	SBSN	19	q13.12	0.147387	5.77423e-05	0.00355135	FALSE	251	FALSE	NA	NA	NA	NA
CIC	SLC5A5	19	p13.11	0.147014	6.03154e-05	0.00365869	FALSE	252	FALSE	NA	NA	NA	NA
CIC	PLAUR	19	q13.31	0.146993	6.04692e-05	0.00365869	FALSE	253	FALSE	NA	NA	NA	NA
CIC	ZNF296	19	q13.32	0.14683	6.16322e-05	0.00371679	FALSE	254	FALSE	NA	NA	NA	NA
CIC	OR12D3	6	p22.1	0.146578	6.34698e-05	0.0037902	FALSE	255	FALSE	0.0110088	TRUE	46	TRUE
CIC	B9D2	19	q13.2	0.14651	6.39753e-05	0.00380798	FALSE	256	FALSE	NA	NA	NA	NA
CIC	ALKBH6	19	q13.12	0.146381	7.5357e-05	0.0043444	FALSE	257	FALSE	NA	NA	NA	NA
CIC	NUDT19	19	q13.11	0.14589	6.87508e-05	0.00406793	FALSE	258	FALSE	NA	NA	NA	NA
CIC	RGS19	20	q13.33	0.145885	6.87959e-05	0.00406793	FALSE	259	FALSE	0.0118121	TRUE	47	TRUE
CIC	OAZ1	19	p13.3	0.145858	6.90081e-05	0.00406793	FALSE	260	FALSE	NA	NA	NA	NA
CIC	CACNG7	19	q13.42	0.145805	6.94321e-05	0.0040798	FALSE	261	FALSE	NA	NA	NA	NA
CIC	SIVA1	14	q32.33	0.145517	7.17873e-05	0.00419133	FALSE	262	FALSE	0.0120816	TRUE	48	TRUE
CIC	LZTR1	22	q11.21	0.145292	7.36804e-05	0.0042882	FALSE	263	FALSE	0.0122786	TRUE	49	TRUE
CIC	MBD3	19	p13.3	0.145264	8.56002e-05	0.00481383	FALSE	264	FALSE	NA	NA	NA	NA
CIC	C19orf84	19	q13.41	0.145233	7.4184e-05	0.00429298	FALSE	265	FALSE	NA	NA	NA	NA
CIC	HPN	19	q13.11	0.145228	7.4231e-05	0.00429298	FALSE	266	FALSE	NA	NA	NA	NA
CIC	PIK3R4	3	q22.1	0.14497	7.64733e-05	0.00439494	FALSE	267	FALSE	0.0124868	TRUE	50	TRUE
CIC	NUP85	17	q25.1	0.144787	7.81078e-05	0.00444705	FALSE	268	FALSE	0.0125252	TRUE	51	TRUE
CIC	PCMT1	6	q25.1	0.144503	8.06989e-05	0.00458035	FALSE	269	FALSE	0.0128198	TRUE	52	TRUE
CIC	CELF5	19	p13.3	0.144304	8.2572e-05	0.00465783	FALSE	270	FALSE	NA	NA	NA	NA
CIC	SPIN2B	X	p11.21	0.144094	0.000139509	0.00673218	FALSE	271	FALSE	0.0175699	TRUE	53	TRUE
CIC	VASP	19	q13.32	0.14392	8.62884e-05	0.00483769	FALSE	272	FALSE	NA	NA	NA	NA
CIC	CAV1	7	q31.2	0.143752	8.79634e-05	0.00491656	FALSE	273	FALSE	0.0137174	TRUE	54	TRUE
CIC	TFAP2C	20	q13.31	0.143658	8.8917e-05	0.00495476	FALSE	274	FALSE	0.0137401	TRUE	55	TRUE
CIC	RUVBL2	19	q13.33	0.143535	0.000104067	0.00547292	FALSE	275	FALSE	NA	NA	NA	NA
CIC	ROBO1	3	p12.3	0.143328	9.23294e-05	0.0050988	FALSE	276	FALSE	0.0138897	TRUE	56	TRUE
CIC	CGB5	19	q13.33	0.143217	9.35085e-05	0.00514802	FALSE	277	FALSE	NA	NA	NA	NA
CIC	CEACAM21	19	q13.2	0.143179	9.39154e-05	0.00515495	FALSE	278	FALSE	NA	NA	NA	NA
CIC	KCNC3	19	q13.33	0.143085	9.49186e-05	0.00517077	FALSE	279	FALSE	NA	NA	NA	NA
CIC	USF2	19	q13.12	0.143047	9.53318e-05	0.00517077	FALSE	280	FALSE	NA	NA	NA	NA
CIC	CCDC124	19	p13.11	0.143	9.58428e-05	0.00518314	FALSE	281	FALSE	NA	NA	NA	NA
CIC	PRKD2	19	q13.32	0.14276	0.000113509	0.00581273	FALSE	282	FALSE	NA	NA	NA	NA
CIC	PRUNE2	9	q21.2	0.142596	0.000100356	0.00539538	FALSE	283	FALSE	0.0145799	TRUE	57	TRUE
CIC	GRPEL1	4	p16.1	0.142416	0.000102428	0.00546533	FALSE	284	FALSE	0.0146309	TRUE	58	TRUE
CIC	FXYD3	19	q13.12	0.142405	0.000102551	0.00546533	FALSE	285	FALSE	NA	NA	NA	NA
CIC	CCER2	19	q13.2	0.142376	0.000102888	0.00546738	FALSE	286	FALSE	NA	NA	NA	NA
CIC	DMAC2	19	q13.2	0.142316	0.000103592	0.00547292	FALSE	287	FALSE	NA	NA	NA	NA
CIC	FXYD5	19	q13.12	0.142246	0.000104412	0.00547292	FALSE	288	FALSE	NA	NA	NA	NA
CIC	ZNF567	19	q13.12	0.142131	0.000105784	0.00551723	FALSE	289	FALSE	NA	NA	NA	NA
CIC	PRKCG	19	q13.42	0.142119	0.000105933	0.00551723	FALSE	290	FALSE	NA	NA	NA	NA
CIC	UBAP2L	1	q21.3	0.142059	0.000122734	0.00614775	FALSE	291	FALSE	0.0162987	TRUE	59	TRUE
CIC	PNMA2	8	p21.2	0.141964	0.000107799	0.00556901	FALSE	292	FALSE	0.0148972	TRUE	60	TRUE
CIC	IFNL3	19	q13.2	0.141961	0.000107838	0.00556901	FALSE	293	FALSE	NA	NA	NA	NA
CIC	XAB2	19	p13.2	0.141933	0.000108186	0.00557128	FALSE	294	FALSE	NA	NA	NA	NA
CIC	DDIT4	10	q22.1	0.141722	0.000110794	0.00568962	FALSE	295	FALSE	0.0151878	TRUE	61	TRUE
CIC	DDX3X	X	p11.4	0.141542	0.000183371	0.00828016	FALSE	296	FALSE	0.0213489	TRUE	62	TRUE
CIC	KLK11	19	q13.41	0.141276	0.000116499	0.00594925	FALSE	297	FALSE	NA	NA	NA	NA
CIC	CEP89	19	q13.11	0.141124	0.00011852	0.00603563	FALSE	298	FALSE	NA	NA	NA	NA
CIC	ZFP36	19	q13.2	0.141072	0.000119207	0.00605382	FALSE	299	FALSE	NA	NA	NA	NA
CIC	KLK13	19	q13.41	0.140938	0.000121014	0.00609489	FALSE	300	FALSE	NA	NA	NA	NA
CIC	CDC37	19	p13.2	0.140363	0.000129071	0.00644301	FALSE	301	FALSE	NA	NA	NA	NA
CIC	CYP2F1	19	q13.2	0.140345	0.000129331	0.00644301	FALSE	302	FALSE	NA	NA	NA	NA
CIC	R3HDM4	19	p13.3	0.14023	0.000131008	0.00649126	FALSE	303	FALSE	NA	NA	NA	NA
CIC	CUL3	2	q36.2	0.140088	0.000133108	0.00657753	FALSE	304	FALSE	0.0174043	TRUE	63	TRUE
CIC	COX6B2	19	q13.42	0.140057	0.000133571	0.00658268	FALSE	305	FALSE	NA	NA	NA	NA
CIC	USP29	19	q13.43	0.139945	0.000135252	0.00664616	FALSE	306	FALSE	NA	NA	NA	NA
CIC	IGSF23	19	q13.31	0.139912	0.000135741	0.00664616	FALSE	307	FALSE	NA	NA	NA	NA
CIC	FNDC11	20	q13.33	0.139899	0.000135947	0.00664616	FALSE	308	FALSE	0.0175699	TRUE	64	TRUE
CIC	OR7E24	19	p13.2	0.139708	0.000138877	0.00673218	FALSE	309	FALSE	NA	NA	NA	NA
CIC	KCNMA1	10	q22.3	0.139707	0.000138892	0.00673218	FALSE	310	FALSE	0.0175699	TRUE	65	TRUE
CIC	ZNF793	19	q13.12	0.139464	0.000142697	0.00684333	FALSE	311	FALSE	NA	NA	NA	NA
CIC	SPHK2	19	q13.33	0.139425	0.000143321	0.00684333	FALSE	312	FALSE	NA	NA	NA	NA
CIC	DDA1	19	p13.11	0.139229	0.000146477	0.00697495	FALSE	313	FALSE	NA	NA	NA	NA
CIC	TUBGCP3	13	q34	0.139056	0.000149305	0.00708362	FALSE	314	FALSE	0.0182859	TRUE	66	TRUE
CIC	STMN2	8	q21.13	0.139043	0.000149532	0.00708362	FALSE	315	FALSE	0.0182859	TRUE	67	TRUE
CIC	KLF1	19	p13.13	0.139001	0.000171899	0.00791817	FALSE	316	FALSE	NA	NA	NA	NA
CIC	PIN1	19	p13.2	0.138788	0.000153805	0.00725282	FALSE	317	FALSE	NA	NA	NA	NA
CIC	GPR32	19	q13.33	0.138781	0.000153927	0.00725282	FALSE	318	FALSE	NA	NA	NA	NA
CIC	SWSAP1	19	p13.2	0.138753	0.000154401	0.00725282	FALSE	319	FALSE	NA	NA	NA	NA
CIC	LIN7B	19	q13.33	0.138723	0.000154916	0.00725282	FALSE	320	FALSE	NA	NA	NA	NA
CIC	CLIP3	19	q13.12	0.138714	0.000155081	0.00725282	FALSE	321	FALSE	NA	NA	NA	NA
CIC	ZGLP1	19	p13.2	0.138003	0.000167734	0.00778497	FALSE	322	FALSE	NA	NA	NA	NA
CIC	EIF1AX	X	p22.12	0.137956	0.000267208	0.0107428	FALSE	323	FALSE	0.0265614	FALSE	68	FALSE
CIC	ZNF8	19	q13.43	0.137825	0.00017105	0.00789891	FALSE	324	FALSE	NA	NA	NA	NA
CIC	ZNF814	19	q13.43	0.137756	0.000172363	0.00791962	FALSE	325	FALSE	NA	NA	NA	NA
CIC	CHAF1A	19	p13.3	0.137661	0.000198817	0.00867835	FALSE	326	FALSE	NA	NA	NA	NA
CIC	ZNF302	19	q13.11	0.137579	0.000175743	0.00805475	FALSE	327	FALSE	NA	NA	NA	NA
CIC	ZNF439	19	p13.2	0.137482	0.00017763	0.00810074	FALSE	328	FALSE	NA	NA	NA	NA
CIC	NF1	17	q11.2	0.137375	0.000179725	0.00817593	FALSE	329	FALSE	0.0212151	FALSE	69	FALSE
CIC	ZNF765	19	q13.42	0.137289	0.000181425	0.00823202	FALSE	330	FALSE	NA	NA	NA	NA
CIC	CREB3L3	19	p13.3	0.136984	0.000187597	0.00841926	FALSE	331	FALSE	NA	NA	NA	NA
CIC	ZNF766	19	q13.41	0.136972	0.000187829	0.00841926	FALSE	332	FALSE	NA	NA	NA	NA
CIC	PSG8	19	q13.2	0.136935	0.000188599	0.00843314	FALSE	333	FALSE	NA	NA	NA	NA
CIC	PUF60	8	q24.3	0.136867	0.00019	0.00847509	FALSE	334	FALSE	0.0218217	FALSE	70	FALSE
CIC	GPR4	19	q13.32	0.136721	0.000193054	0.00859045	FALSE	335	FALSE	NA	NA	NA	NA
CIC	TSKS	19	q13.33	0.136676	0.000194004	0.0086117	FALSE	336	FALSE	NA	NA	NA	NA
CIC	FBXO46	19	q13.32	0.13664	0.000194777	0.0086117	FALSE	337	FALSE	NA	NA	NA	NA
CIC	SHCBP1	16	q11.2	0.136621	0.000195181	0.0086117	FALSE	338	FALSE	0.022144	FALSE	71	FALSE
CIC	PITPNM2	12	q24.31	0.13661	0.000195411	0.0086117	FALSE	339	FALSE	0.022144	FALSE	72	FALSE
CIC	EPN1	19	q13.42	0.136534	0.000197041	0.00865092	FALSE	340	FALSE	NA	NA	NA	NA
CIC	PPP6R1	19	q13.42	0.136481	0.00019818	0.00867121	FALSE	341	FALSE	NA	NA	NA	NA
CIC	SIX5	19	q13.32	0.136267	0.00020286	0.00880979	FALSE	342	FALSE	NA	NA	NA	NA
CIC	H1F0	NA	NA	0.136248	0.000203269	0.00880979	FALSE	343	FALSE	0.0225828	FALSE	73	FALSE
CIC	FFAR1	19	q13.12	0.136156	0.000205319	0.00886129	FALSE	344	FALSE	NA	NA	NA	NA
CIC	KCNK6	19	q13.2	0.136142	0.000205633	0.00886129	FALSE	345	FALSE	NA	NA	NA	NA
CIC	TYROBP	19	q13.12	0.136084	0.000206945	0.00888508	FALSE	346	FALSE	NA	NA	NA	NA
CIC	LRFN3	19	q13.12	0.136004	0.000208736	0.00894102	FALSE	347	FALSE	NA	NA	NA	NA
CIC	PPP1R3E	14	q11.2	0.135947	0.000210041	0.00897597	FALSE	348	FALSE	0.0229604	FALSE	74	FALSE
CIC	SPRED2	2	p14	0.135632	0.000217348	0.00922597	FALSE	349	FALSE	0.0235098	FALSE	75	FALSE
CIC	ECH1	19	q13.2	0.13561	0.000217864	0.00922597	FALSE	350	FALSE	NA	NA	NA	NA
CIC	CD33	19	q13.41	0.135608	0.000217905	0.00922597	FALSE	351	FALSE	NA	NA	NA	NA
CIC	OR6C4	12	q13.2	0.135313	0.000224992	0.00943885	FALSE	352	FALSE	0.0237541	FALSE	76	FALSE
CIC	FUT1	19	q13.33	0.135234	0.000226916	0.00949784	FALSE	353	FALSE	NA	NA	NA	NA
CIC	MPIG6B	6	p21.33	0.135069	0.000231002	0.00962491	FALSE	354	FALSE	0.0240894	FALSE	77	FALSE
CIC	CD79A	19	q13.2	0.13493	0.00023448	0.00972563	FALSE	355	FALSE	NA	NA	NA	NA
CIC	PPP1R12C	19	q13.42	0.134771	0.000238545	0.00987189	FALSE	356	FALSE	NA	NA	NA	NA
CIC	SLC25A42	19	p13.11	0.134686	0.000240718	0.00993938	FALSE	357	FALSE	NA	NA	NA	NA
CIC	ZBTB32	19	q13.12	0.13448	0.000279314	0.0110837	FALSE	358	FALSE	NA	NA	NA	NA
CIC	IL4I1	19	q13.33	0.134332	0.000250078	0.0102565	FALSE	359	FALSE	NA	NA	NA	NA
CIC	ZNF610	19	q13.41	0.134179	0.000254217	0.010395	FALSE	360	FALSE	NA	NA	NA	NA
CIC	ZSWIM7	17	p12	0.134094	0.000256535	0.0104281	FALSE	361	FALSE	0.0258023	FALSE	78	FALSE
CIC	EPHX3	19	p13.12	0.134051	0.000257725	0.0104533	FALSE	362	FALSE	NA	NA	NA	NA
CIC	ETFB	19	q13.41	0.133995	0.000259289	0.0104704	FALSE	363	FALSE	NA	NA	NA	NA
CIC	OSCAR	19	q13.42	0.133901	0.000261911	0.010553	FALSE	364	FALSE	NA	NA	NA	NA
CIC	CHST8	19	q13.11	0.133426	0.000275551	0.0110058	FALSE	365	FALSE	NA	NA	NA	NA
CIC	PSG9	19	q13.31	0.133211	0.000281954	0.0111395	FALSE	366	FALSE	NA	NA	NA	NA
CIC	WDR62	19	q13.12	0.13312	0.000284692	0.0112001	FALSE	367	FALSE	NA	NA	NA	NA
CIC	ZNF507	19	q13.11	0.133089	0.00028562	0.0112126	FALSE	368	FALSE	NA	NA	NA	NA
CIC	RASAL3	19	p13.12	0.133045	0.00028698	0.0112419	FALSE	369	FALSE	NA	NA	NA	NA
CIC	SIGLEC9	19	q13.41	0.13298	0.000288972	0.0112958	FALSE	370	FALSE	NA	NA	NA	NA
CIC	ANAPC11	17	q25.3	0.132933	0.000290431	0.0113041	FALSE	371	FALSE	0.0275796	FALSE	79	FALSE
CIC	ZNF527	19	q13.12	0.132913	0.000291035	0.0113041	FALSE	372	FALSE	NA	NA	NA	NA
CIC	PSMD14	2	q24.2	0.132845	0.000331737	0.0124117	FALSE	373	FALSE	0.0296782	FALSE	80	FALSE
CIC	KIR2DL1	19	q13.42	0.132633	0.000299834	0.0115907	FALSE	374	FALSE	NA	NA	NA	NA
CIC	ZNF285	19	q13.31	0.132618	0.000300309	0.0115907	FALSE	375	FALSE	NA	NA	NA	NA
CIC	CIAO3	16	p13.3	0.132498	0.00030414	0.0116893	FALSE	376	FALSE	0.0283632	FALSE	81	FALSE
CIC	PDCD10	3	q26.1	0.132337	0.000309395	0.0118169	FALSE	377	FALSE	0.0284275	FALSE	82	FALSE
CIC	SF3A2	19	p13.3	0.132298	0.000310685	0.0118415	FALSE	378	FALSE	NA	NA	NA	NA
CIC	MRI1	19	p13.13	0.132232	0.000312863	0.0118998	FALSE	379	FALSE	NA	NA	NA	NA
CIC	ZNF653	19	p13.2	0.132178	0.000314639	0.0119116	FALSE	380	FALSE	NA	NA	NA	NA
CIC	CLDND2	19	q13.41	0.132164	0.000315122	0.0119116	FALSE	381	FALSE	NA	NA	NA	NA
CIC	CYB5R4	6	q14.2	0.131932	0.000322942	0.0121571	FALSE	382	FALSE	0.0291988	FALSE	83	FALSE
CIC	OPA3	19	q13.32	0.131729	0.000329946	0.0123699	FALSE	383	FALSE	NA	NA	NA	NA
CIC	OR1L4	9	q33.2	0.131347	0.000343469	0.0127476	FALSE	384	FALSE	0.0300028	FALSE	84	FALSE
CIC	UEVLD	11	p15.1	0.131336	0.000343867	0.0127476	FALSE	385	FALSE	0.0300028	FALSE	85	FALSE
CIC	HKR1	NA	NA	0.131268	0.000346359	0.012802	FALSE	386	FALSE	NA	NA	NA	NA
CIC	GTPBP3	19	p13.11	0.131095	0.000352699	0.0130101	FALSE	387	FALSE	NA	NA	NA	NA
CIC	SPACA9	9	q34.13	0.130835	0.000362447	0.0133161	FALSE	388	FALSE	0.0310232	FALSE	86	FALSE
CIC	ADGRL1	19	p13.12	0.130751	0.000365658	0.0133466	FALSE	389	FALSE	NA	NA	NA	NA
CIC	SOX18	20	q13.33	0.130732	0.000366386	0.0133466	FALSE	390	FALSE	0.0310232	FALSE	87	FALSE
CIC	FOXO3	6	q21	0.130729	0.000366525	0.0133466	FALSE	391	FALSE	0.0310232	FALSE	88	FALSE
CIC	ZNF426	19	p13.2	0.1307	0.000367639	0.0133466	FALSE	392	FALSE	NA	NA	NA	NA
CIC	IGFL2	19	q13.32	0.130699	0.000367644	0.0133466	FALSE	393	FALSE	NA	NA	NA	NA
CIC	PSMB5	14	q11.2	0.130541	0.00037381	0.0134495	FALSE	394	FALSE	0.0310232	FALSE	89	FALSE
CIC	SLC6A2	16	q12.2	0.130532	0.000374148	0.0134495	FALSE	395	FALSE	0.0310232	FALSE	90	FALSE
CIC	ZBTB7A	19	p13.3	0.130251	0.00038528	0.0137612	FALSE	396	FALSE	NA	NA	NA	NA
CIC	GPAM	10	q25.2	0.130238	0.000385821	0.0137612	FALSE	397	FALSE	0.0315297	FALSE	91	FALSE
CIC	ALKBH2	12	q24.11	0.13014	0.00043897	0.0151271	FALSE	398	FALSE	0.0342276	FALSE	92	FALSE
CIC	PSG6	19	q13.31	0.130093	0.000391702	0.0139438	FALSE	399	FALSE	NA	NA	NA	NA
CIC	GAPDHS	19	q13.12	0.130039	0.000393923	0.0139957	FALSE	400	FALSE	NA	NA	NA	NA
CIC	IRF3	19	q13.33	0.129766	0.000405287	0.0142887	FALSE	401	FALSE	NA	NA	NA	NA
CIC	SNRPB	20	p13	0.129689	0.000459745	0.0154651	FALSE	402	FALSE	0.0345785	FALSE	93	FALSE
CIC	PSME1	14	q12	0.12964	0.000410617	0.014446	FALSE	403	FALSE	0.0329032	FALSE	94	FALSE
CIC	KIR3DL2	19	q13.42	0.12962	0.000411461	0.014446	FALSE	404	FALSE	NA	NA	NA	NA
CIC	RB1CC1	8	q11.23	0.129591	0.0004127	0.014446	FALSE	405	FALSE	0.0329032	FALSE	95	FALSE
CIC	ARHGEF18	19	p13.2	0.129587	0.000412899	0.014446	FALSE	406	FALSE	NA	NA	NA	NA
CIC	UFD1	22	q11.21	0.129556	0.000414242	0.0144653	FALSE	407	FALSE	0.0329032	FALSE	96	FALSE
CIC	PTF1A	10	p12.2	0.129244	0.000427868	0.0148845	FALSE	408	FALSE	0.0336709	FALSE	97	FALSE
CIC	RASGRP4	19	q13.2	0.129147	0.000432179	0.0150059	FALSE	409	FALSE	NA	NA	NA	NA
CIC	ZNF699	19	p13.2	0.129124	0.000433218	0.0150136	FALSE	410	FALSE	NA	NA	NA	NA
CIC	SYNGR4	19	q13.33	0.129024	0.0004377	0.0151271	FALSE	411	FALSE	NA	NA	NA	NA
CIC	IFNGR1	6	q23.3	0.129007	0.000438493	0.0151271	FALSE	412	FALSE	0.0342276	FALSE	98	FALSE
CIC	TOR1B	9	q34.11	0.128879	0.000444331	0.0152446	FALSE	413	FALSE	0.0343307	FALSE	99	FALSE
CIC	HOMER3	19	p13.11	0.128867	0.000444874	0.0152446	FALSE	414	FALSE	NA	NA	NA	NA
CIC	XPR1	1	q25.3	0.128817	0.000447205	0.0152959	FALSE	415	FALSE	0.0343963	FALSE	100	FALSE
CIC	NDUFA13	19	p13.11	0.128784	0.000448729	0.0153195	FALSE	416	FALSE	NA	NA	NA	NA
CIC	ZIM3	19	q13.43	0.128765	0.000449618	0.0153213	FALSE	417	FALSE	NA	NA	NA	NA
CIC	HNRNPK	9	q21.32	0.12873	0.000506949	0.0166856	FALSE	418	FALSE	0.0371428	FALSE	101	FALSE
CIC	ZNF599	19	q13.11	0.128716	0.000451884	0.0153699	FALSE	419	FALSE	NA	NA	NA	NA
CIC	PVR	19	q13.31	0.128662	0.000454427	0.015407	FALSE	420	FALSE	NA	NA	NA	NA
CIC	ELOVL6	4	q25	0.128575	0.000458513	0.0154651	FALSE	421	FALSE	0.0345785	FALSE	102	FALSE
CIC	STK24	13	q32.2	0.128563	0.000459105	0.0154651	FALSE	422	FALSE	0.0345785	FALSE	103	FALSE
CIC	ZNF234	19	q13.31	0.128421	0.000465832	0.0156412	FALSE	423	FALSE	NA	NA	NA	NA
CIC	NLRP5	19	q13.43	0.128378	0.000467928	0.0156805	FALSE	424	FALSE	NA	NA	NA	NA
CIC	SMIM7	19	p13.11	0.128362	0.000468712	0.0156805	FALSE	425	FALSE	NA	NA	NA	NA
CIC	RBM42	19	q13.12	0.128165	0.000478322	0.0159438	FALSE	426	FALSE	NA	NA	NA	NA
CIC	ZNF562	19	p13.2	0.127783	0.000497449	0.0164914	FALSE	427	FALSE	NA	NA	NA	NA
CIC	PDE4C	19	p13.11	0.127658	0.000503883	0.0166146	FALSE	428	FALSE	NA	NA	NA	NA
CIC	ACP4	19	q13.33	0.127505	0.000511833	0.0168162	FALSE	429	FALSE	NA	NA	NA	NA
CIC	PYGL	14	q22.1	0.127426	0.000515968	0.0169217	FALSE	430	FALSE	0.0376413	FALSE	104	FALSE
CIC	APOC2	19	q13.32	0.127388	0.000517977	0.0169573	FALSE	431	FALSE	NA	NA	NA	NA
CIC	CCDC8	19	q13.32	0.127146	0.000530964	0.0173206	FALSE	432	FALSE	NA	NA	NA	NA
CIC	PPP1R37	19	q13.32	0.126883	0.000545437	0.0177296	FALSE	433	FALSE	NA	NA	NA	NA
CIC	GRWD1	19	q13.33	0.126774	0.000551521	0.017864	FALSE	434	FALSE	NA	NA	NA	NA
CIC	SPHAR	NA	NA	0.126589	0.000561988	0.018139	FALSE	435	FALSE	0.0401373	FALSE	105	FALSE
CIC	STRN4	19	q13.32	0.126492	0.000567532	0.0182536	FALSE	436	FALSE	NA	NA	NA	NA
CIC	PCID2	13	q34	0.126457	0.000569597	0.018288	FALSE	437	FALSE	0.0402591	FALSE	106	FALSE
CIC	ZNF222	19	q13.31	0.126073	0.000592237	0.0187425	FALSE	438	FALSE	NA	NA	NA	NA
CIC	SPINT2	19	q13.2	0.126061	0.000592954	0.0187425	FALSE	439	FALSE	NA	NA	NA	NA
CIC	UBXN6	19	p13.3	0.125879	0.000603971	0.0190251	FALSE	440	FALSE	NA	NA	NA	NA
CIC	KRT19	17	q21.2	0.125636	0.000619026	0.019386	FALSE	441	FALSE	0.0419211	FALSE	107	FALSE
CIC	SYDE1	19	p13.12	0.125625	0.000619658	0.019386	FALSE	442	FALSE	NA	NA	NA	NA
CIC	NDUFA5	7	q31.32	0.125551	0.000624327	0.0194962	FALSE	443	FALSE	0.0421123	FALSE	108	FALSE
CIC	NDUFA11	19	p13.3	0.125536	0.000625307	0.0194962	FALSE	444	FALSE	NA	NA	NA	NA
CIC	CDK2	12	q13.2	0.125434	0.000705831	0.021495	FALSE	445	FALSE	0.0461255	FALSE	109	FALSE
CIC	TMEM59L	19	p13.11	0.125394	0.00063433	0.0197105	FALSE	446	FALSE	NA	NA	NA	NA
CIC	CRYM	16	p12.2	0.125005	0.000736452	0.0221334	FALSE	447	FALSE	0.0468806	FALSE	110	FALSE
CIC	TRAPPC5	19	p13.2	0.125005	0.000659685	0.0204291	FALSE	448	FALSE	NA	NA	NA	NA
CIC	TIPRL	1	q24.2	0.124968	0.000662084	0.0204688	FALSE	449	FALSE	0.0441337	FALSE	111	FALSE
CIC	CEACAM7	19	q13.2	0.124895	0.000666997	0.020586	FALSE	450	FALSE	NA	NA	NA	NA
CIC	MEMO1	2	p22.3	0.124789	0.000752356	0.022427	FALSE	451	FALSE	0.0468806	FALSE	112	FALSE
CIC	NOTCH4	6	p21.32	0.124776	0.000675026	0.0207523	FALSE	452	FALSE	0.0446463	FALSE	113	FALSE
CIC	ZNF181	19	q13.11	0.124765	0.000675783	0.0207523	FALSE	453	FALSE	NA	NA	NA	NA
CIC	CALR	19	p13.13	0.124712	0.000679331	0.0208264	FALSE	454	FALSE	NA	NA	NA	NA
CIC	CARM1	19	p13.2	0.124668	0.000761422	0.0224785	FALSE	455	FALSE	NA	NA	NA	NA
CIC	UPF1	19	p13.11	0.124524	0.000772273	0.0226892	FALSE	456	FALSE	NA	NA	NA	NA
CIC	LILRA2	19	q13.42	0.124488	0.000694823	0.0212303	FALSE	457	FALSE	NA	NA	NA	NA
CIC	ZNF582	19	q13.43	0.124219	0.000713756	0.0216442	FALSE	458	FALSE	NA	NA	NA	NA
CIC	ZNF180	19	q13.31	0.124179	0.000716615	0.0216442	FALSE	459	FALSE	NA	NA	NA	NA
CIC	ZAP70	2	q11.2	0.123824	0.000742456	0.0222566	FALSE	460	FALSE	0.0468806	FALSE	114	FALSE
CIC	SRSF2	17	q25.1	0.123724	0.000835444	0.0238199	FALSE	461	FALSE	0.0484672	FALSE	115	FALSE
CIC	TSC2	16	p13.3	0.123641	0.000756178	0.022427	FALSE	462	FALSE	0.0468806	FALSE	116	FALSE
CIC	CYTH4	22	q13.1	0.12363	0.000756978	0.022427	FALSE	463	FALSE	0.0468806	FALSE	117	FALSE
CIC	ADGRE2	19	p13.12	0.123628	0.000757091	0.022427	FALSE	464	FALSE	NA	NA	NA	NA
CIC	PTCH1	9	q22.32	0.123613	0.000758239	0.022427	FALSE	465	FALSE	0.0468806	FALSE	118	FALSE
CIC	TMEM94	17	q25.1	0.123546	0.000763332	0.0224987	FALSE	466	FALSE	0.0470113	FALSE	119	FALSE
CIC	ZNF646	16	p11.2	0.123369	0.000776895	0.0227456	FALSE	467	FALSE	0.0473321	FALSE	120	FALSE
CIC	ZFP82	19	q13.12	0.123356	0.000777914	0.0227456	FALSE	468	FALSE	NA	NA	NA	NA
CIC	TFE3	X	p11.23	0.123212	0.00114421	0.0294617	FALSE	469	FALSE	0.056413	FALSE	121	FALSE
CIC	MAN2A1	5	q21.3	0.12319	0.00079083	0.0230498	FALSE	470	FALSE	0.0477715	FALSE	122	FALSE
CIC	TRO	X	p11.21	0.123126	0.00115344	0.0295336	FALSE	471	FALSE	0.056413	FALSE	123	FALSE
CIC	PGLYRP1	19	q13.32	0.123113	0.000796908	0.0231533	FALSE	472	FALSE	NA	NA	NA	NA
CIC	SPIDR	8	q11.21	0.123079	0.000799614	0.0231951	FALSE	473	FALSE	0.0477715	FALSE	124	FALSE
CIC	HS3ST3B1	17	p12	0.123034	0.000803136	0.0232058	FALSE	474	FALSE	0.0477715	FALSE	125	FALSE
CIC	OR11H2	14	q11.2	0.123032	0.000803327	0.0232058	FALSE	475	FALSE	0.0477715	FALSE	126	FALSE
CIC	NMRK2	19	p13.3	0.123002	0.000805691	0.0232244	FALSE	476	FALSE	NA	NA	NA	NA
CIC	IARS	NA	NA	0.122906	0.000813419	0.0233737	FALSE	477	FALSE	0.0480086	FALSE	127	FALSE
CIC	CEBPB	20	q13.13	0.122766	0.000824785	0.0236262	FALSE	478	FALSE	0.0483438	FALSE	128	FALSE
CIC	SLFN14	17	q12	0.122671	0.000832551	0.0237744	FALSE	479	FALSE	0.0484647	FALSE	129	FALSE
CIC	ARHGEF1	19	q13.2	0.122618	0.000836943	0.0238256	FALSE	480	FALSE	NA	NA	NA	NA
CIC	IER2	19	p13.13	0.122549	0.000842628	0.0239502	FALSE	481	FALSE	NA	NA	NA	NA
CIC	PRR12	19	q13.33	0.122395	0.000855547	0.0241921	FALSE	482	FALSE	NA	NA	NA	NA
CIC	KRTAP13-4	21	q22.11	0.122385	0.000856417	0.0241921	FALSE	483	FALSE	0.0491803	FALSE	130	FALSE
CIC	OR5K2	3	q11.2	0.122136	0.000877726	0.0247179	FALSE	484	FALSE	0.0500657	FALSE	131	FALSE
CIC	KIDINS220	2	p25.1	0.122093	0.000881386	0.0247829	FALSE	485	FALSE	0.0501064	FALSE	132	FALSE
CIC	UQCRFS1	19	q12	0.121997	0.000889802	0.0249465	FALSE	486	FALSE	NA	NA	NA	NA
CIC	ZNF585A	19	q13.12	0.121507	0.000933655	0.0260528	FALSE	487	FALSE	NA	NA	NA	NA
CIC	CHMP6	17	q25.3	0.121481	0.000936007	0.0260788	FALSE	488	FALSE	0.0525091	FALSE	133	FALSE
CIC	ZNF784	19	q13.42	0.121461	0.000937852	0.0260905	FALSE	489	FALSE	NA	NA	NA	NA
CIC	PSMG3	7	p22.3	0.121387	0.00094468	0.0262406	FALSE	490	FALSE	0.0528212	FALSE	134	FALSE
CIC	THEM5	1	q21.3	0.121354	0.000947785	0.0262871	FALSE	491	FALSE	0.0528212	FALSE	135	FALSE
CIC	LILRB2	19	q13.42	0.121228	0.000959538	0.0265624	FALSE	492	FALSE	NA	NA	NA	NA
CIC	EQTN	9	p21.2	0.121183	0.000963784	0.02661	FALSE	493	FALSE	0.0533629	FALSE	136	FALSE
CIC	PRTN3	19	p13.3	0.121098	0.000971795	0.0267909	FALSE	494	FALSE	NA	NA	NA	NA
CIC	ITPRIP	10	q25.1	0.121079	0.00097357	0.0267995	FALSE	495	FALSE	0.0535753	FALSE	137	FALSE
CIC	E2F7	12	q21.2	0.120912	0.00109743	0.0286191	FALSE	496	FALSE	0.0553316	FALSE	138	FALSE
CIC	ATP4A	19	q13.12	0.12087	0.000993631	0.0271838	FALSE	497	FALSE	NA	NA	NA	NA
CIC	MYBPC2	19	q13.33	0.120733	0.00100699	0.0271838	FALSE	498	FALSE	NA	NA	NA	NA
CIC	CCDC159	19	p13.2	0.120732	0.00100711	0.0271838	FALSE	499	FALSE	NA	NA	NA	NA
CIC	CAPN12	19	q13.2	0.120723	0.00100799	0.0271838	FALSE	500	FALSE	NA	NA	NA	NA
CIC	LECT2	5	q31.1	0.120713	0.001009	0.0271838	FALSE	501	FALSE	0.053618	FALSE	139	FALSE
CIC	TSHZ3	19	q12	0.120635	0.00112705	0.0291428	FALSE	502	FALSE	NA	NA	NA	NA
CIC	FIGN	2	q24.3	0.120544	0.00102572	0.0274518	FALSE	503	FALSE	0.0539789	FALSE	140	FALSE
CIC	LKAAEAR1	20	q13.33	0.120437	0.00103652	0.0276707	FALSE	504	FALSE	0.0541728	FALSE	141	FALSE
CIC	PDXP	22	q13.1	0.120412	0.00103896	0.0276851	FALSE	505	FALSE	0.0541728	FALSE	142	FALSE
CIC	MAGEC1	X	q27.2	0.120391	0.0014859	0.0343951	FALSE	506	FALSE	0.0620572	FALSE	143	FALSE
CIC	CEACAM16	19	q13.31	0.120344	0.0010459	0.0278295	FALSE	507	FALSE	NA	NA	NA	NA
CIC	PPP1R14A	19	q13.2	0.120067	0.00107436	0.0283705	FALSE	508	FALSE	NA	NA	NA	NA
CIC	LGALS4	19	q13.2	0.120056	0.00107552	0.0283705	FALSE	509	FALSE	NA	NA	NA	NA
CIC	SRR	17	p13.3	0.119962	0.00108541	0.0285269	FALSE	510	FALSE	0.0553316	FALSE	144	FALSE
CIC	TNFSF9	19	p13.3	0.119955	0.00108611	0.0285269	FALSE	511	FALSE	NA	NA	NA	NA
CIC	GKAP1	9	q21.32	0.119849	0.00109739	0.0286191	FALSE	512	FALSE	0.0553316	FALSE	145	FALSE
CIC	CHRNA6	8	p11.21	0.11976	0.00110689	0.0287838	FALSE	513	FALSE	0.0555011	FALSE	146	FALSE
CIC	ZNF844	19	p13.2	0.11968	0.00111549	0.0289255	FALSE	514	FALSE	NA	NA	NA	NA
CIC	MSRB1	16	p13.3	0.119598	0.00112435	0.0291141	FALSE	515	FALSE	0.0560462	FALSE	147	FALSE
CIC	HEPH	X	q12	0.119541	0.001606	0.0361261	FALSE	516	FALSE	0.0650105	FALSE	148	FALSE
CIC	LRRC4B	19	q13.33	0.119424	0.00114336	0.0294617	FALSE	517	FALSE	NA	NA	NA	NA
CIC	CTXN3	5	q23.2	0.119387	0.00114749	0.0295048	FALSE	518	FALSE	0.056413	FALSE	149	FALSE
CIC	ZNF540	19	q13.12	0.119282	0.00115912	0.0295963	FALSE	519	FALSE	NA	NA	NA	NA
CIC	UNKL	16	p13.3	0.119216	0.00116655	0.0296621	FALSE	520	FALSE	0.056413	FALSE	150	FALSE
CIC	BRF2	8	p11.23	0.119201	0.00116822	0.0296633	FALSE	521	FALSE	0.056413	FALSE	151	FALSE
CIC	GGA1	22	q13.1	0.11912	0.00117745	0.0298151	FALSE	522	FALSE	0.0565374	FALSE	152	FALSE
CIC	ZNF358	19	p13.2	0.118878	0.00120517	0.0303495	FALSE	523	FALSE	NA	NA	NA	NA
CIC	RPP25	15	q24.2	0.118851	0.00120825	0.03035	FALSE	524	FALSE	0.0572204	FALSE	153	FALSE
CIC	FAM209A	20	q13.31	0.118849	0.0012085	0.03035	FALSE	525	FALSE	0.0572204	FALSE	154	FALSE
CIC	ACP5	19	p13.2	0.118833	0.00121035	0.0303547	FALSE	526	FALSE	NA	NA	NA	NA
CIC	ZNF625	19	p13.2	0.118765	0.00121825	0.0304855	FALSE	527	FALSE	NA	NA	NA	NA
CIC	TNFAIP8L1	19	p13.3	0.118734	0.00122187	0.0305184	FALSE	528	FALSE	NA	NA	NA	NA
CIC	MAP3K10	19	q13.2	0.118618	0.00136527	0.0326754	FALSE	529	FALSE	NA	NA	NA	NA
CIC	LRRC43	12	q24.31	0.118554	0.00124319	0.0309473	FALSE	530	FALSE	0.0582506	FALSE	155	FALSE
CIC	SPATA2	20	q13.13	0.118517	0.00124767	0.030994	FALSE	531	FALSE	0.0582506	FALSE	156	FALSE
CIC	KLK4	19	q13.41	0.11847	0.00125323	0.031048	FALSE	532	FALSE	NA	NA	NA	NA
CIC	ZNF583	19	q13.43	0.118373	0.001265	0.0312702	FALSE	533	FALSE	NA	NA	NA	NA
CIC	OR2A25	7	q35	0.118305	0.00127319	0.0314151	FALSE	534	FALSE	0.0589104	FALSE	157	FALSE
CIC	PHF12	17	q11.2	0.118156	0.00142604	0.0335604	FALSE	535	FALSE	0.0610135	FALSE	158	FALSE
CIC	CCNB2	15	q22.2	0.118151	0.00129218	0.0317981	FALSE	536	FALSE	0.0589104	FALSE	159	FALSE
CIC	SBNO1	12	q24.31	0.118086	0.0013002	0.0318108	FALSE	537	FALSE	0.0589104	FALSE	160	FALSE
CIC	TK2	16	q21	0.118055	0.00130401	0.0318108	FALSE	538	FALSE	0.0589104	FALSE	161	FALSE
CIC	C12orf43	12	q24.31	0.118049	0.00130476	0.0318108	FALSE	539	FALSE	0.0589104	FALSE	162	FALSE
CIC	ETFA	15	q24.3	0.118035	0.00130658	0.0318108	FALSE	540	FALSE	0.0589104	FALSE	163	FALSE
CIC	DAND5	19	p13.13	0.117861	0.00132844	0.0322634	FALSE	541	FALSE	NA	NA	NA	NA
CIC	SSC5D	19	q13.42	0.117859	0.00132869	0.0322634	FALSE	542	FALSE	NA	NA	NA	NA
CIC	PLXNA1	3	q21.3	0.117824	0.00133317	0.0322855	FALSE	543	FALSE	0.0594342	FALSE	164	FALSE
CIC	LYRM9	17	q11.2	0.117813	0.00133453	0.0322855	FALSE	544	FALSE	0.0594342	FALSE	165	FALSE
CIC	CUX2	12	q24.11	0.117782	0.00133841	0.0322855	FALSE	545	FALSE	0.0594342	FALSE	166	FALSE
CIC	TSC1	9	q34.13	0.117763	0.00134085	0.0323019	FALSE	546	FALSE	0.0594342	FALSE	167	FALSE
CIC	CATSPERD	19	p13.3	0.117712	0.0013474	0.0323322	FALSE	547	FALSE	NA	NA	NA	NA
CIC	AQP4	18	q11.2	0.117459	0.00138029	0.0329491	FALSE	548	FALSE	0.0604215	FALSE	168	FALSE
CIC	OR10H5	19	p13.12	0.117404	0.00138751	0.0330353	FALSE	549	FALSE	NA	NA	NA	NA
CIC	DPP9	19	p13.3	0.117269	0.00140543	0.033289	FALSE	550	FALSE	NA	NA	NA	NA
CIC	AKR1B1	7	q33	0.11718	0.00141735	0.033485	FALSE	551	FALSE	0.0610135	FALSE	169	FALSE
CIC	OTUD6B	8	q21.3	0.117097	0.0014286	0.0335776	FALSE	552	FALSE	0.0610135	FALSE	170	FALSE
CIC	GABRG3	15	q12	0.116952	0.00144828	0.0339097	FALSE	553	FALSE	0.0613689	FALSE	171	FALSE
CIC	PDZRN3	3	p13	0.11693	0.00145137	0.0339386	FALSE	554	FALSE	0.0613689	FALSE	172	FALSE
CIC	SPACA4	19	q13.33	0.116888	0.00145713	0.0340299	FALSE	555	FALSE	NA	NA	NA	NA
CIC	CYP4F22	19	p13.12	0.11678	0.00147214	0.0342249	FALSE	556	FALSE	NA	NA	NA	NA
CIC	FAAP24	19	q13.11	0.116704	0.00148272	0.0343857	FALSE	557	FALSE	NA	NA	NA	NA
CIC	SIN3B	19	p13.11	0.116632	0.00164442	0.0367201	FALSE	558	FALSE	NA	NA	NA	NA
CIC	FUT2	19	q13.33	0.1166	0.0014974	0.034574	FALSE	559	FALSE	NA	NA	NA	NA
CIC	PAX9	14	q13.3	0.116545	0.00150512	0.0346926	FALSE	560	FALSE	0.0624498	FALSE	173	FALSE
CIC	ACADM	1	p31.1	0.116537	0.00150632	0.0346926	FALSE	561	FALSE	0.0624498	FALSE	174	FALSE
CIC	GDF1	19	p13.11	0.116479	0.00151454	0.0347509	FALSE	562	FALSE	NA	NA	NA	NA
CIC	FAM32A	19	p13.11	0.116367	0.00153069	0.0350778	FALSE	563	FALSE	NA	NA	NA	NA
CIC	FGF21	19	q13.33	0.116315	0.00153826	0.0351631	FALSE	564	FALSE	NA	NA	NA	NA
CIC	NDUFA7	19	p13.2	0.116299	0.00154048	0.0351701	FALSE	565	FALSE	NA	NA	NA	NA
CIC	LENG9	19	q13.42	0.116248	0.00154789	0.0352721	FALSE	566	FALSE	NA	NA	NA	NA
CIC	PTGIR	19	q13.32	0.116242	0.0015488	0.0352721	FALSE	567	FALSE	NA	NA	NA	NA
CIC	GFAP	17	q21.31	0.116223	0.00155156	0.0352913	FALSE	568	FALSE	0.063704	FALSE	175	FALSE
CIC	COMP	19	p13.11	0.116201	0.00155488	0.035323	FALSE	569	FALSE	NA	NA	NA	NA
CIC	DLX5	7	q21.3	0.116197	0.00171214	0.0375912	FALSE	570	FALSE	0.0669034	FALSE	176	FALSE
CIC	TM6SF2	19	p13.11	0.116093	0.00157073	0.0355217	FALSE	571	FALSE	NA	NA	NA	NA
CIC	IRF2BP1	19	q13.32	0.116023	0.00158105	0.0356525	FALSE	572	FALSE	NA	NA	NA	NA
CIC	SIGLEC5	19	q13.41	0.115925	0.00159568	0.0359381	FALSE	573	FALSE	NA	NA	NA	NA
CIC	UNC119B	12	q24.31	0.115824	0.0016109	0.0361705	FALSE	574	FALSE	0.0650105	FALSE	177	FALSE
CIC	PDE4B	1	p31.3	0.115818	0.00161192	0.0361705	FALSE	575	FALSE	0.0650105	FALSE	178	FALSE
CIC	SUGP1	19	p13.11	0.115739	0.00162383	0.0363487	FALSE	576	FALSE	NA	NA	NA	NA
CIC	NDUFAF4	6	q16.1	0.115666	0.00163502	0.0365547	FALSE	577	FALSE	0.0657024	FALSE	179	FALSE
CIC	RAD23A	19	p13.13	0.115566	0.00165051	0.0367664	FALSE	578	FALSE	NA	NA	NA	NA
CIC	ASH1L	1	q22	0.115437	0.0018367	0.0392876	FALSE	579	FALSE	0.0691462	FALSE	180	FALSE
CIC	OR1M1	19	p13.2	0.115344	0.00168517	0.037357	FALSE	580	FALSE	NA	NA	NA	NA
CIC	KPNB1	17	q21.32	0.115313	0.00169	0.0374188	FALSE	581	FALSE	0.0668385	FALSE	181	FALSE
CIC	CDK5	7	q36.1	0.115186	0.00171029	0.0375912	FALSE	582	FALSE	0.0669034	FALSE	182	FALSE
CIC	KANSL1	17	q21.31	0.115174	0.00188174	0.0397952	FALSE	583	FALSE	0.0696212	FALSE	183	FALSE
CIC	CATSPERG	19	q13.2	0.115157	0.00171481	0.0376047	FALSE	584	FALSE	NA	NA	NA	NA
CIC	KRT24	17	q21.2	0.115118	0.00172112	0.037698	FALSE	585	FALSE	0.0670999	FALSE	184	FALSE
CIC	NLRP7	19	q13.42	0.114997	0.00174071	0.0379911	FALSE	586	FALSE	NA	NA	NA	NA
CIC	TUFT1	1	q21.3	0.114903	0.00175604	0.0382346	FALSE	587	FALSE	0.0677781	FALSE	185	FALSE
CIC	DNM1L	12	p11.21	0.114873	0.0017609	0.0382829	FALSE	588	FALSE	0.0677781	FALSE	186	FALSE
CIC	NUP107	12	q15	0.114808	0.00177169	0.0384384	FALSE	589	FALSE	0.0679803	FALSE	187	FALSE
CIC	BST2	19	p13.11	0.114728	0.00178485	0.0386499	FALSE	590	FALSE	NA	NA	NA	NA
CIC	HOXD3	2	q31.1	0.114723	0.00178566	0.0386499	FALSE	591	FALSE	0.0683618	FALSE	188	FALSE
CIC	GPSM3	6	p21.32	0.114686	0.00179191	0.0387394	FALSE	592	FALSE	0.0684469	FALSE	189	FALSE
CIC	CCDC151	NA	NA	0.114648	0.00179815	0.0387973	FALSE	593	FALSE	NA	NA	NA	NA
CIC	ZSCAN18	19	q13.43	0.114645	0.00179882	0.0387973	FALSE	594	FALSE	NA	NA	NA	NA
CIC	TRIM42	3	q23	0.114605	0.00180547	0.038895	FALSE	595	FALSE	0.0687975	FALSE	190	FALSE
CIC	IZUMO4	19	p13.3	0.11453	0.00181813	0.039076	FALSE	596	FALSE	NA	NA	NA	NA
CIC	TSHZ2	20	q13.2	0.114515	0.0018206	0.0390831	FALSE	597	FALSE	0.069077	FALSE	191	FALSE
CIC	STARD3	17	q12	0.114418	0.00183705	0.0392876	FALSE	598	FALSE	0.0691462	FALSE	192	FALSE
CIC	SIGLEC11	19	q13.33	0.114332	0.00185188	0.0394487	FALSE	599	FALSE	NA	NA	NA	NA
CIC	DUSP7	3	p21.2	0.114187	0.0018769	0.0397952	FALSE	600	FALSE	0.0696212	FALSE	193	FALSE
CIC	BAX	19	q13.33	0.11416	0.00188166	0.0397952	FALSE	601	FALSE	NA	NA	NA	NA
CIC	DTL	1	q32.3	0.113951	0.00191838	0.040286	FALSE	602	FALSE	0.0701262	FALSE	194	FALSE
CIC	OR10H1	19	p13.12	0.113934	0.00192148	0.040305	FALSE	603	FALSE	NA	NA	NA	NA
CIC	RPGR	X	p11.4	0.113931	0.00264923	0.0499675	FALSE	604	FALSE	0.083755	FALSE	195	FALSE
CIC	TRAPPC2B	19	q13.43	0.113806	0.00194429	0.0405136	FALSE	605	FALSE	NA	NA	NA	NA
CIC	ZNF266	19	p13.2	0.113804	0.00194469	0.0405136	FALSE	606	FALSE	NA	NA	NA	NA
CIC	PSMC3IP	17	q21.2	0.113724	0.00214847	0.0434744	FALSE	607	FALSE	0.0752472	FALSE	196	FALSE
CIC	CRACR2A	12	p13.32	0.113627	0.00197689	0.0410739	FALSE	608	FALSE	0.0713443	FALSE	197	FALSE
CIC	MUM1	NA	NA	0.113611	0.00197971	0.0410739	FALSE	609	FALSE	NA	NA	NA	NA
CIC	RYR1	19	q13.2	0.113601	0.00198148	0.0410739	FALSE	610	FALSE	NA	NA	NA	NA
CIC	NRTN	19	p13.3	0.113594	0.00198278	0.0410739	FALSE	611	FALSE	NA	NA	NA	NA
CIC	CALM3	19	q13.32	0.113573	0.0019866	0.0411065	FALSE	612	FALSE	NA	NA	NA	NA
CIC	ZIC3	X	q26.3	0.113559	0.00273656	0.0510341	FALSE	613	FALSE	0.0849648	FALSE	198	FALSE
CIC	NPFFR2	4	q13.3	0.113458	0.00200784	0.0414524	FALSE	614	FALSE	0.0721549	FALSE	199	FALSE
CIC	RFPL4A	19	q13.42	0.113386	0.00202118	0.041634	FALSE	615	FALSE	NA	NA	NA	NA
CIC	PSG2	19	q13.31	0.113285	0.00204024	0.0419796	FALSE	616	FALSE	NA	NA	NA	NA
CIC	ZNF555	19	p13.3	0.113213	0.00205368	0.0422087	FALSE	617	FALSE	NA	NA	NA	NA
CIC	ZNF121	19	p13.2	0.11313	0.00206947	0.0424381	FALSE	618	FALSE	NA	NA	NA	NA
CIC	ZNF880	19	q13.41	0.113006	0.0020932	0.0428742	FALSE	619	FALSE	NA	NA	NA	NA
CIC	KANSL3	2	q11.2	0.112995	0.00229526	0.0456389	FALSE	620	FALSE	0.0781862	FALSE	200	FALSE
CIC	OR1Q1	9	q33.2	0.112992	0.00209587	0.0428742	FALSE	621	FALSE	0.0747661	FALSE	201	FALSE
CIC	ZNF682	19	p12	0.112982	0.00209775	0.0428742	FALSE	622	FALSE	NA	NA	NA	NA
CIC	FAM178B	2	q11.2	0.112881	0.00211735	0.0430826	FALSE	623	FALSE	0.0749807	FALSE	202	FALSE
CIC	SMG5	1	q22	0.112678	0.00215725	0.043556	FALSE	624	FALSE	0.0752955	FALSE	203	FALSE
CIC	EPB41L4B	9	q31.3	0.112626	0.00216744	0.0437135	FALSE	625	FALSE	0.0754595	FALSE	204	FALSE
CIC	SUPT5H	19	q13.2	0.112469	0.00240685	0.0470915	FALSE	626	FALSE	NA	NA	NA	NA
CIC	NCOA3	20	q13.12	0.112411	0.00241949	0.047238	FALSE	627	FALSE	0.0802693	FALSE	205	FALSE
CIC	CDK4	12	q14.1	0.112381	0.0022166	0.0444606	FALSE	628	FALSE	0.0764256	FALSE	206	FALSE
CIC	ISYNA1	19	p13.11	0.112258	0.00224182	0.0448683	FALSE	629	FALSE	NA	NA	NA	NA
CIC	EGR1	5	q31.2	0.112183	0.00225724	0.0450784	FALSE	630	FALSE	0.077356	FALSE	207	FALSE
CIC	NPLOC4	17	q25.3	0.112093	0.00227572	0.0453812	FALSE	631	FALSE	0.0778323	FALSE	208	FALSE
CIC	ZNF420	19	q13.12	0.112085	0.00227735	0.0453812	FALSE	632	FALSE	NA	NA	NA	NA
CIC	LPAR2	19	p13.11	0.11191	0.00231398	0.0459114	FALSE	633	FALSE	NA	NA	NA	NA
CIC	COX7A1	19	q13.12	0.111857	0.00232538	0.0460877	FALSE	634	FALSE	NA	NA	NA	NA
CIC	INTS6L	X	q26.3	0.111778	0.00319216	0.0558948	FALSE	635	FALSE	0.0910408	FALSE	209	FALSE
CIC	SLC25A3	12	q23.1	0.111749	0.00234834	0.0464424	FALSE	636	FALSE	0.0794968	FALSE	210	FALSE
CIC	SCARB2	4	q21.1	0.111729	0.00235245	0.0464735	FALSE	637	FALSE	0.0794968	FALSE	211	FALSE
CIC	NDUFA6	22	q13.2	0.111673	0.0023646	0.0466239	FALSE	638	FALSE	0.0795546	FALSE	212	FALSE
CIC	C2orf70	NA	NA	0.11167	0.00236515	0.0466239	FALSE	639	FALSE	0.0795546	FALSE	213	FALSE
CIC	MAGEB5	X	p21.3	0.111556	0.00325351	0.056537	FALSE	640	FALSE	0.0915615	FALSE	214	FALSE
CIC	UXS1	2	q12.2	0.111548	0.00239168	0.0469451	FALSE	641	FALSE	0.07987	FALSE	215	FALSE
CIC	DIS3L2	2	q37.1	0.111514	0.00239908	0.0470399	FALSE	642	FALSE	0.0799599	FALSE	216	FALSE
CIC	ZNF606	19	q13.43	0.111491	0.00240392	0.0470844	FALSE	643	FALSE	NA	NA	NA	NA
CIC	CLPP	19	p13.3	0.111229	0.00246179	0.0477588	FALSE	644	FALSE	NA	NA	NA	NA
CIC	SOX8	16	p13.3	0.111124	0.00248543	0.0481154	FALSE	645	FALSE	0.0814013	FALSE	217	FALSE
CIC	CHTF18	16	p13.3	0.111093	0.00249237	0.048199	FALSE	646	FALSE	0.0814718	FALSE	218	FALSE
CIC	KAT8	16	p11.2	0.111068	0.00272848	0.05099	FALSE	647	FALSE	0.0849648	FALSE	219	FALSE
CIC	ZNF14	19	p13.11	0.110995	0.00251468	0.0485279	FALSE	648	FALSE	NA	NA	NA	NA
CIC	ZSWIM4	19	p13.13	0.110828	0.00255274	0.0490437	FALSE	649	FALSE	NA	NA	NA	NA
CIC	TMEM160	19	q13.32	0.110819	0.00255492	0.0490437	FALSE	650	FALSE	NA	NA	NA	NA
CIC	ZNF543	19	q13.43	0.110784	0.002563	0.0490988	FALSE	651	FALSE	NA	NA	NA	NA
CIC	ADAM17	2	p25.1	0.11075	0.00257081	0.0490997	FALSE	652	FALSE	0.0827168	FALSE	220	FALSE
CIC	BTN2A1	6	p22.2	0.110746	0.00257189	0.0490997	FALSE	653	FALSE	0.0827168	FALSE	221	FALSE
CIC	FPR1	19	q13.41	0.110721	0.00257771	0.0490997	FALSE	654	FALSE	NA	NA	NA	NA
CIC	CNOT6	5	q35.3	0.110715	0.00257906	0.0490997	FALSE	655	FALSE	0.0827168	FALSE	222	FALSE
CIC	YTHDF1	20	q13.33	0.110715	0.00257912	0.0490997	FALSE	656	FALSE	0.0827168	FALSE	223	FALSE
CIC	TMEM204	16	p13.3	0.110667	0.00259031	0.0492617	FALSE	657	FALSE	0.0829064	FALSE	224	FALSE
CIC	DEGS1	1	q42.11	0.110647	0.00259479	0.0492956	FALSE	658	FALSE	0.0829064	FALSE	225	FALSE
CIC	ZNF813	19	q13.42	0.110628	0.00259925	0.0493293	FALSE	659	FALSE	NA	NA	NA	NA
CIC	AAAS	12	q13.13	0.110555	0.00261662	0.0496076	FALSE	660	FALSE	0.0834471	FALSE	226	FALSE
CIC	UBR5	8	q22.3	0.110547	0.00285781	0.0523374	FALSE	661	FALSE	0.086759	FALSE	227	FALSE
CIC	CYP2A13	19	q13.2	0.110417	0.00264916	0.0499675	FALSE	662	FALSE	NA	NA	NA	NA
CIC	TMEM106A	17	q21.31	0.110258	0.00268734	0.0503752	FALSE	663	FALSE	0.0841241	FALSE	228	FALSE
CIC	ARHGDIB	12	p12.3	0.110187	0.00270467	0.0506483	FALSE	664	FALSE	0.0845109	FALSE	229	FALSE
CIC	BABAM1	19	p13.11	0.110168	0.00295541	0.0533283	FALSE	665	FALSE	NA	NA	NA	NA
CIC	IL12RB1	19	p13.11	0.11016	0.00271123	0.0507194	FALSE	666	FALSE	NA	NA	NA	NA
CIC	ZXDA	X	p11.21	0.110152	0.00366729	0.0607614	FALSE	667	FALSE	0.0961985	FALSE	230	FALSE
CIC	HMG20B	19	p13.3	0.110062	0.00298319	0.0537239	FALSE	668	FALSE	NA	NA	NA	NA
CIC	PRKACA	19	p13.12	0.109981	0.00275522	0.0512342	FALSE	669	FALSE	NA	NA	NA	NA
CIC	RPL18A	19	p13.11	0.10998	0.00275552	0.0512342	FALSE	670	FALSE	NA	NA	NA	NA
CIC	POU2F2	19	q13.2	0.109963	0.00275964	0.0512588	FALSE	671	FALSE	NA	NA	NA	NA
CIC	VPS28	8	q24.3	0.109923	0.00276966	0.0513929	FALSE	672	FALSE	0.0856936	FALSE	231	FALSE
CIC	ZNF564	19	p13.2	0.109885	0.00277901	0.0514622	FALSE	673	FALSE	NA	NA	NA	NA
CIC	CYP4F11	19	p13.12	0.109872	0.00278222	0.0514696	FALSE	674	FALSE	NA	NA	NA	NA
CIC	TUT1	11	q12.3	0.109859	0.00278553	0.051479	FALSE	675	FALSE	0.0859319	FALSE	232	FALSE
CIC	ESR1	6	q25.1	0.109796	0.0028014	0.0517201	FALSE	676	FALSE	0.0862648	FALSE	233	FALSE
CIC	PCDHGA12	5	q31.3	0.109627	0.00284403	0.0523374	FALSE	677	FALSE	0.086759	FALSE	234	FALSE
CIC	MAG	19	q13.12	0.109618	0.00284633	0.0523374	FALSE	678	FALSE	NA	NA	NA	NA
CIC	TMEM102	17	p13.1	0.109553	0.0028628	0.0523374	FALSE	679	FALSE	0.086759	FALSE	235	FALSE
CIC	TBC1D7	6	p24.1	0.109445	0.00289055	0.0526937	FALSE	680	FALSE	0.0871448	FALSE	236	FALSE
CIC	ARRDC3	5	q14.3	0.109442	0.0028915	0.0526937	FALSE	681	FALSE	0.0871448	FALSE	237	FALSE
CIC	ZNF416	19	q13.43	0.109392	0.00290438	0.0528759	FALSE	682	FALSE	NA	NA	NA	NA
CIC	JUP	17	q21.2	0.109328	0.0031823	0.0558631	FALSE	683	FALSE	0.0910408	FALSE	238	FALSE
CIC	C22orf46	22	q13.2	0.109318	0.00292365	0.0530612	FALSE	684	FALSE	0.0875677	FALSE	239	FALSE
CIC	DBP	19	q13.33	0.109291	0.00293074	0.0530921	FALSE	685	FALSE	NA	NA	NA	NA
CIC	PSMC4	19	q13.2	0.109266	0.00293718	0.0531563	FALSE	686	FALSE	NA	NA	NA	NA
CIC	PSMD9	12	q24.31	0.109226	0.00321112	0.0561197	FALSE	687	FALSE	0.0912754	FALSE	240	FALSE
CIC	IGFL1	19	q13.32	0.109205	0.0029533	0.0533283	FALSE	688	FALSE	NA	NA	NA	NA
CIC	TMEM201	1	p36.22	0.109157	0.00296589	0.0534647	FALSE	689	FALSE	0.0884458	FALSE	241	FALSE
CIC	CCDC91	12	p11.22	0.108999	0.00300796	0.0540255	FALSE	690	FALSE	0.0892554	FALSE	242	FALSE
CIC	NFYA	6	p21.1	0.108909	0.00330166	0.0569395	FALSE	691	FALSE	0.0916353	FALSE	243	FALSE
CIC	TMEM178A	2	p22.1	0.108895	0.00303589	0.0543792	FALSE	692	FALSE	0.0896681	FALSE	244	FALSE
CIC	DMRTC2	19	q13.2	0.108888	0.00303776	0.0543792	FALSE	693	FALSE	NA	NA	NA	NA
CIC	BSPH1	19	q13.33	0.108786	0.00306567	0.0546195	FALSE	694	FALSE	NA	NA	NA	NA
CIC	NSF	17	q21.31	0.108769	0.00307019	0.0546195	FALSE	695	FALSE	0.0898658	FALSE	245	FALSE
CIC	SLC38A8	16	q23.3	0.108615	0.00311248	0.0550783	FALSE	696	FALSE	0.0902831	FALSE	246	FALSE
CIC	ZNF529	19	q13.12	0.108486	0.00314847	0.0555044	FALSE	697	FALSE	NA	NA	NA	NA
CIC	RPL19	17	q12	0.108485	0.00314867	0.0555044	FALSE	698	FALSE	0.0908677	FALSE	247	FALSE
CIC	ABCC5	3	q27.1	0.108455	0.00315689	0.0555958	FALSE	699	FALSE	0.0909505	FALSE	248	FALSE
CIC	PYDC1	16	p11.2	0.108358	0.00318425	0.0558631	FALSE	700	FALSE	0.0910408	FALSE	249	FALSE
CIC	RMC1	18	q11.2	0.108287	0.00320427	0.0560532	FALSE	701	FALSE	0.091233	FALSE	250	FALSE
CIC	PTPN21	14	q31.3	0.108239	0.00321811	0.0561881	FALSE	702	FALSE	0.0913212	FALSE	251	FALSE
CIC	NKX2-4	20	p11.22	0.108199	0.00322935	0.0563308	FALSE	703	FALSE	0.0914235	FALSE	252	FALSE
CIC	TOP3B	22	q11.22	0.108188	0.00323247	0.0563316	FALSE	704	FALSE	0.0914235	FALSE	253	FALSE
CIC	VSNL1	2	p24.2	0.108029	0.00327825	0.0568223	FALSE	705	FALSE	0.0916353	FALSE	254	FALSE
CIC	KRT36	17	q21.2	0.107945	0.00330261	0.0569395	FALSE	706	FALSE	0.0916353	FALSE	255	FALSE
CIC	AMDHD2	16	p13.3	0.107941	0.00330382	0.0569395	FALSE	707	FALSE	0.0916353	FALSE	256	FALSE
CIC	MEOX2	7	p21.2	0.107924	0.00330899	0.0569395	FALSE	708	FALSE	0.0916353	FALSE	257	FALSE
CIC	PHOX2B	4	p13	0.10792	0.00331004	0.0569395	FALSE	709	FALSE	0.0916353	FALSE	258	FALSE
CIC	ZNF576	19	q13.31	0.107917	0.00331083	0.0569395	FALSE	710	FALSE	NA	NA	NA	NA
CIC	ATP6V0B	1	p34.1	0.107882	0.00332126	0.0570653	FALSE	711	FALSE	0.0917963	FALSE	259	FALSE
CIC	ACSBG2	19	p13.3	0.10787	0.0033246	0.0570692	FALSE	712	FALSE	NA	NA	NA	NA
CIC	EYA4	6	q23.2	0.107771	0.00364587	0.0605981	FALSE	713	FALSE	0.0960813	FALSE	260	FALSE
CIC	MANBAL	20	q11.23	0.107724	0.00336775	0.0574869	FALSE	714	FALSE	0.092182	FALSE	261	FALSE
CIC	TUBG2	17	q21.2	0.107686	0.00337912	0.0576274	FALSE	715	FALSE	0.0923445	FALSE	262	FALSE
CIC	GIMAP1	7	q36.1	0.107642	0.00339232	0.057745	FALSE	716	FALSE	0.0924081	FALSE	263	FALSE
CIC	NAPA	19	q13.33	0.107582	0.00341014	0.0579444	FALSE	717	FALSE	NA	NA	NA	NA
CIC	NETO2	16	q12.1	0.107458	0.00344775	0.0584174	FALSE	718	FALSE	0.0930608	FALSE	264	FALSE
CIC	DPRX	19	q13.42	0.107434	0.00345482	0.0584337	FALSE	719	FALSE	NA	NA	NA	NA
CIC	ANXA1	9	q21.13	0.107409	0.00346255	0.0584337	FALSE	720	FALSE	0.0930608	FALSE	265	FALSE
CIC	HRNR	1	q21.3	0.107386	0.00346948	0.0584337	FALSE	721	FALSE	0.0930608	FALSE	266	FALSE
CIC	COPB1	11	p15.2	0.107381	0.00347103	0.0584337	FALSE	722	FALSE	0.0930608	FALSE	267	FALSE
CIC	CNBD1	8	q21.3	0.107294	0.00349781	0.0587767	FALSE	723	FALSE	0.093484	FALSE	268	FALSE
CIC	PGLS	19	p13.11	0.107241	0.00351399	0.058888	FALSE	724	FALSE	NA	NA	NA	NA
CIC	BCAM	19	q13.32	0.107209	0.00352377	0.0589446	FALSE	725	FALSE	NA	NA	NA	NA
CIC	WNT9A	1	q42.13	0.107083	0.00356296	0.0594359	FALSE	726	FALSE	0.0943357	FALSE	269	FALSE
CIC	KCTD7	7	q11.21	0.107083	0.00356298	0.0594359	FALSE	727	FALSE	0.0943357	FALSE	270	FALSE
CIC	CROCC	1	p36.13	0.107004	0.00358782	0.0597416	FALSE	728	FALSE	0.0946984	FALSE	271	FALSE
CIC	NLRP9	19	q13.42	0.106888	0.00362431	0.0602945	FALSE	729	FALSE	NA	NA	NA	NA
CIC	EMP3	19	q13.33	0.106749	0.00366895	0.0607614	FALSE	730	FALSE	NA	NA	NA	NA
CIC	PSMB6	17	p13.2	0.106688	0.0036884	0.060937	FALSE	731	FALSE	0.0964544	FALSE	272	FALSE
CIC	LRFN1	19	q13.2	0.106685	0.00368952	0.060937	FALSE	732	FALSE	NA	NA	NA	NA
CIC	KRI1	19	p13.2	0.106618	0.00371109	0.0611708	FALSE	733	FALSE	NA	NA	NA	NA
CIC	HCST	19	q13.12	0.106572	0.00372617	0.0612662	FALSE	734	FALSE	NA	NA	NA	NA
CIC	ATP6V1H	8	q11.23	0.106486	0.00375425	0.0615686	FALSE	735	FALSE	0.0972273	FALSE	273	FALSE
CIC	F2RL1	5	q13.3	0.106474	0.00375799	0.0615686	FALSE	736	FALSE	0.0972273	FALSE	274	FALSE
CIC	ZNF563	19	p13.2	0.106402	0.00378182	0.0618698	FALSE	737	FALSE	NA	NA	NA	NA
CIC	RASSF5	1	q32.1	0.106398	0.00378312	0.0618698	FALSE	738	FALSE	0.0977288	FALSE	275	FALSE
CIC	AP3M1	10	q22.2	0.10629	0.00381886	0.062343	FALSE	739	FALSE	0.098353	FALSE	276	FALSE
CIC	DRAM2	1	p13.3	0.106253	0.0038312	0.0624888	FALSE	740	FALSE	0.0985215	FALSE	277	FALSE
CIC	ZNF229	19	q13.31	0.106195	0.00385049	0.0627477	FALSE	741	FALSE	NA	NA	NA	NA
CIC	MAFB	20	q12	0.106092	0.00388513	0.0631861	FALSE	742	FALSE	0.099612	FALSE	278	FALSE
CIC	CBLC	19	q13.32	0.106078	0.00388995	0.0631861	FALSE	743	FALSE	NA	NA	NA	NA
CIC	SH3GL2	9	p22.2	0.105981	0.00392275	0.0635154	FALSE	744	FALSE	0.0998228	FALSE	279	FALSE
CIC	INAFM1	19	q13.32	0.105858	0.00396489	0.0639863	FALSE	745	FALSE	NA	NA	NA	NA
CIC	LCMT1	16	p12.1	0.105842	0.00397048	0.0640201	FALSE	746	FALSE	0.100582	FALSE	280	FALSE
CIC	THOC1	18	p11.32	0.105795	0.0039868	0.0642231	FALSE	747	FALSE	0.100764	FALSE	281	FALSE
CIC	NLRP14	11	p15.4	0.105785	0.00399008	0.0642231	FALSE	748	FALSE	0.100764	FALSE	282	FALSE
CIC	HSD17B14	19	q13.33	0.105748	0.004003	0.0642618	FALSE	749	FALSE	NA	NA	NA	NA
CIC	TRPS1	8	q23.3	0.105614	0.00404993	0.0648449	FALSE	750	FALSE	0.101535	FALSE	283	FALSE
CIC	FBXW5	9	q34.3	0.105512	0.00408583	0.0652636	FALSE	751	FALSE	0.101946	FALSE	284	FALSE
CIC	RRM1	11	p15.4	0.105504	0.00408877	0.0652636	FALSE	752	FALSE	0.101946	FALSE	285	FALSE
CIC	FAM163B	9	q34.2	0.105499	0.00409032	0.0652636	FALSE	753	FALSE	0.101946	FALSE	286	FALSE
CIC	TNNC2	20	q13.12	0.105457	0.00410514	0.0654427	FALSE	754	FALSE	0.102026	FALSE	287	FALSE
CIC	ZNF709	19	p13.2	0.105447	0.00410868	0.0654427	FALSE	755	FALSE	NA	NA	NA	NA
CIC	EPHA2	1	p36.13	0.10542	0.00411836	0.0654902	FALSE	756	FALSE	0.102026	FALSE	288	FALSE
CIC	RINL	19	q13.2	0.105366	0.0041376	0.0655585	FALSE	757	FALSE	NA	NA	NA	NA
CIC	NUP153	6	p22.3	0.105337	0.00414814	0.0655585	FALSE	758	FALSE	0.102041	FALSE	289	FALSE
CIC	GMFG	19	q13.2	0.105282	0.00416805	0.0658164	FALSE	759	FALSE	NA	NA	NA	NA
CIC	AURKA	20	q13.2	0.105244	0.0041815	0.0658761	FALSE	760	FALSE	0.102506	FALSE	290	FALSE
CIC	SCGB2B2	19	q13.11	0.105231	0.0041862	0.0658761	FALSE	761	FALSE	NA	NA	NA	NA
CIC	CBX1	17	q21.32	0.10521	0.00454236	0.0692229	FALSE	762	FALSE	0.106304	FALSE	291	FALSE
CIC	POTED	21	q11.2	0.105204	0.00419616	0.0659435	FALSE	763	FALSE	0.102552	FALSE	292	FALSE
CIC	ISOC2	19	q13.42	0.105196	0.00419905	0.0659435	FALSE	764	FALSE	NA	NA	NA	NA
CIC	MISP	19	p13.3	0.10516	0.00421209	0.0660566	FALSE	765	FALSE	NA	NA	NA	NA
CIC	PCIF1	20	q13.12	0.105128	0.00422372	0.0660814	FALSE	766	FALSE	0.102552	FALSE	293	FALSE
CIC	PTEN	10	q23.31	0.105123	0.00422555	0.0660814	FALSE	767	FALSE	0.102552	FALSE	294	FALSE
CIC	GUCA1C	3	q13.13	0.105101	0.00423344	0.0660814	FALSE	768	FALSE	0.102552	FALSE	295	FALSE
CIC	MBOAT1	6	p22.3	0.105096	0.00423529	0.0660814	FALSE	769	FALSE	0.102552	FALSE	296	FALSE
CIC	SLC25A51	9	p13.1	0.105035	0.00425785	0.0663205	FALSE	770	FALSE	0.102805	FALSE	297	FALSE
CIC	CCL3	17	q12	0.104993	0.0042732	0.0665031	FALSE	771	FALSE	0.10303	FALSE	298	FALSE
CIC	C3orf52	3	q13.2	0.104958	0.00428608	0.0665787	FALSE	772	FALSE	0.103048	FALSE	299	FALSE
CIC	ZNF823	19	p13.2	0.104949	0.00428959	0.0665787	FALSE	773	FALSE	NA	NA	NA	NA
CIC	NKX2-1	14	q13.3	0.10494	0.00429259	0.0665787	FALSE	774	FALSE	0.103059	FALSE	300	FALSE
CIC	MPND	19	p13.3	0.104908	0.00430453	0.0667075	FALSE	775	FALSE	NA	NA	NA	NA
CIC	FOXD4L1	2	q14.1	0.104808	0.00434169	0.0670567	FALSE	776	FALSE	0.103652	FALSE	301	FALSE
CIC	ZNF443	19	p13.2	0.104787	0.00434978	0.0671249	FALSE	777	FALSE	NA	NA	NA	NA
CIC	ZCCHC4	4	p15.2	0.104736	0.00436882	0.0673056	FALSE	778	FALSE	0.104007	FALSE	302	FALSE
CIC	C2orf50	2	p25.1	0.104667	0.00439495	0.0675945	FALSE	779	FALSE	0.104337	FALSE	303	FALSE
CIC	OR1J1	9	q33.2	0.104602	0.00441962	0.0679169	FALSE	780	FALSE	0.104776	FALSE	304	FALSE
CIC	SLC35G2	3	q22.3	0.104519	0.00445108	0.068286	FALSE	781	FALSE	0.105229	FALSE	305	FALSE
CIC	CLPTM1	19	q13.32	0.104485	0.00446428	0.0683897	FALSE	782	FALSE	NA	NA	NA	NA
CIC	OR2A7	7	q35	0.104317	0.00452875	0.0691303	FALSE	783	FALSE	0.106304	FALSE	306	FALSE
CIC	PLEKHO2	15	q22.31	0.10426	0.00455107	0.0692676	FALSE	784	FALSE	0.106304	FALSE	307	FALSE
CIC	SOWAHB	4	q21.1	0.104256	0.00455285	0.0692676	FALSE	785	FALSE	0.106304	FALSE	308	FALSE
CIC	CLEC17A	19	p13.12	0.104103	0.0046128	0.0699474	FALSE	786	FALSE	NA	NA	NA	NA
CIC	C19orf33	19	q13.2	0.104077	0.00462306	0.0699872	FALSE	787	FALSE	NA	NA	NA	NA
CIC	TIMP1	X	p11.3	0.104032	0.0060861	0.081981	FALSE	788	FALSE	0.119971	FALSE	309	FALSE
CIC	CCDC61	19	q13.32	0.103932	0.00468066	0.0703198	FALSE	789	FALSE	NA	NA	NA	NA
CIC	FBXW8	12	q24.22	0.103931	0.00468105	0.0703198	FALSE	790	FALSE	0.107516	FALSE	310	FALSE
CIC	CLTA	9	p13.3	0.103916	0.00468699	0.0703198	FALSE	791	FALSE	0.107516	FALSE	311	FALSE
CIC	ZNF491	19	p13.2	0.103916	0.00468722	0.0703198	FALSE	792	FALSE	NA	NA	NA	NA
CIC	OGFR	20	q13.33	0.103697	0.00477572	0.0712395	FALSE	793	FALSE	0.108526	FALSE	312	FALSE
CIC	FOXA3	19	q13.32	0.103621	0.00480652	0.0715429	FALSE	794	FALSE	NA	NA	NA	NA
CIC	WDR66	NA	NA	0.103613	0.00480975	0.0715429	FALSE	795	FALSE	0.108841	FALSE	313	FALSE
CIC	SLC25A27	6	p12.3	0.103609	0.00481167	0.0715429	FALSE	796	FALSE	0.108841	FALSE	314	FALSE
CIC	TAGAP	6	q25.3	0.103583	0.00482202	0.0715533	FALSE	797	FALSE	0.108841	FALSE	315	FALSE
CIC	KLK1	19	q13.33	0.103571	0.00482721	0.0715533	FALSE	798	FALSE	NA	NA	NA	NA
CIC	GGN	19	q13.2	0.103516	0.00484992	0.0717624	FALSE	799	FALSE	NA	NA	NA	NA
CIC	ACTN4	19	q13.2	0.103499	0.00485692	0.071808	FALSE	800	FALSE	NA	NA	NA	NA
CIC	CD300E	17	q25.1	0.103464	0.0048714	0.0719061	FALSE	801	FALSE	0.109385	FALSE	316	FALSE
CIC	TMEM86B	19	q13.42	0.103454	0.00487568	0.0719114	FALSE	802	FALSE	NA	NA	NA	NA
CIC	QPCTL	19	q13.32	0.103419	0.00489012	0.0720085	FALSE	803	FALSE	NA	NA	NA	NA
CIC	GMNN	6	p22.3	0.103359	0.00491508	0.0721442	FALSE	804	FALSE	0.109608	FALSE	317	FALSE
CIC	ZFYVE16	5	q14.1	0.103347	0.00492002	0.072159	FALSE	805	FALSE	0.109608	FALSE	318	FALSE
CIC	KLHL11	17	q21.2	0.103294	0.00494251	0.0724309	FALSE	806	FALSE	0.109964	FALSE	319	FALSE
CIC	OR2A12	7	q35	0.103264	0.00495489	0.0725543	FALSE	807	FALSE	0.110096	FALSE	320	FALSE
CIC	QDPR	4	p15.32	0.103243	0.00496394	0.0726288	FALSE	808	FALSE	0.110153	FALSE	321	FALSE
CIC	TRAPPC6A	19	q13.32	0.103135	0.00500943	0.0731194	FALSE	809	FALSE	NA	NA	NA	NA
CIC	PSG11	19	q13.31	0.103024	0.00505707	0.073603	FALSE	810	FALSE	NA	NA	NA	NA
CIC	HAP1	17	q21.2	0.103013	0.00506174	0.073603	FALSE	811	FALSE	0.111432	FALSE	322	FALSE
CIC	MAU2	19	p13.11	0.102987	0.00507273	0.0736328	FALSE	812	FALSE	NA	NA	NA	NA
CIC	FBXO31	16	q24.2	0.102902	0.00510933	0.07393	FALSE	813	FALSE	0.111774	FALSE	323	FALSE
CIC	OR51B5	11	p15.4	0.102803	0.00515253	0.0744376	FALSE	814	FALSE	0.11243	FALSE	324	FALSE
CIC	KRT86	12	q13.13	0.102727	0.0051858	0.0747873	FALSE	815	FALSE	0.112735	FALSE	325	FALSE
CIC	SART3	12	q23.3	0.102711	0.00519305	0.0747873	FALSE	816	FALSE	0.112735	FALSE	326	FALSE
CIC	PGLYRP2	19	p13.12	0.102676	0.00520812	0.0748626	FALSE	817	FALSE	NA	NA	NA	NA
CIC	TAAR8	6	q23.2	0.102671	0.00521053	0.0748626	FALSE	818	FALSE	0.112814	FALSE	327	FALSE
CIC	ZNF469	16	q24.2	0.102651	0.00521927	0.0749294	FALSE	819	FALSE	0.112814	FALSE	328	FALSE
CIC	NDUFC1	4	q31.1	0.102627	0.0052299	0.0749646	FALSE	820	FALSE	0.112814	FALSE	329	FALSE
CIC	TDRP	8	p23.3	0.102579	0.00525105	0.075209	FALSE	821	FALSE	0.113127	FALSE	330	FALSE
CIC	SARS	NA	NA	0.102544	0.00526686	0.0753177	FALSE	822	FALSE	0.113181	FALSE	331	FALSE
CIC	KHK	2	p23.3	0.102438	0.00531407	0.0759336	FALSE	823	FALSE	0.113936	FALSE	332	FALSE
CIC	NCK2	2	q12.2	0.102426	0.00531935	0.075938	FALSE	824	FALSE	0.113936	FALSE	333	FALSE
CIC	HMSD	18	q22.1	0.102395	0.00533322	0.0760295	FALSE	825	FALSE	0.113936	FALSE	334	FALSE
CIC	DNAJB1	19	p13.12	0.102365	0.00534702	0.0760487	FALSE	826	FALSE	NA	NA	NA	NA
CIC	TBC1D2	9	q22.33	0.102316	0.00536902	0.0761255	FALSE	827	FALSE	0.113936	FALSE	335	FALSE
CIC	SCAI	9	q33.3	0.102237	0.00582977	0.0798783	FALSE	828	FALSE	0.117829	FALSE	336	FALSE
CIC	MFSD6L	17	p13.1	0.102217	0.00541395	0.0764571	FALSE	829	FALSE	0.114055	FALSE	337	FALSE
CIC	LRP3	19	q13.11	0.102179	0.00543124	0.0765341	FALSE	830	FALSE	NA	NA	NA	NA
CIC	SBK1	16	p12.1	0.102114	0.00546103	0.0766409	FALSE	831	FALSE	0.114097	FALSE	338	FALSE
CIC	IFNL2	19	q13.2	0.102072	0.00548062	0.0768167	FALSE	832	FALSE	NA	NA	NA	NA
CIC	SAXO2	15	q25.2	0.101983	0.00552158	0.0772551	FALSE	833	FALSE	0.114887	FALSE	339	FALSE
CIC	ITM2A	X	q21.1	0.101972	0.0071772	0.090453	FALSE	834	FALSE	0.129298	FALSE	340	FALSE
CIC	GATA3	10	p14	0.101968	0.00552854	0.0772551	FALSE	835	FALSE	0.114887	FALSE	341	FALSE
CIC	SPDEF	6	p21.31	0.101968	0.00552876	0.0772551	FALSE	836	FALSE	0.114887	FALSE	342	FALSE
CIC	DMKN	19	q13.12	0.101957	0.00553403	0.0772699	FALSE	837	FALSE	NA	NA	NA	NA
CIC	ASF1A	6	q22.31	0.101953	0.00596867	0.0810546	FALSE	838	FALSE	0.11894	FALSE	343	FALSE
CIC	TGM2	20	q11.23	0.101893	0.0055636	0.0774902	FALSE	839	FALSE	0.115113	FALSE	344	FALSE
CIC	GMIP	19	p13.11	0.101646	0.00568042	0.0788335	FALSE	840	FALSE	NA	NA	NA	NA
CIC	NDUFB10	16	p13.3	0.101622	0.00569148	0.0789273	FALSE	841	FALSE	0.117123	FALSE	345	FALSE
CIC	ESF1	20	p12.1	0.101578	0.00571255	0.0791099	FALSE	842	FALSE	0.117125	FALSE	346	FALSE
CIC	COQ10A	12	q13.3	0.101577	0.00571328	0.0791099	FALSE	843	FALSE	0.117125	FALSE	347	FALSE
CIC	DUSP4	8	p12	0.101549	0.0057266	0.0791426	FALSE	844	FALSE	0.117125	FALSE	348	FALSE
CIC	ZNF441	19	p13.2	0.101524	0.00573841	0.0791589	FALSE	845	FALSE	NA	NA	NA	NA
CIC	FAM222A	12	q24.11	0.101484	0.00575785	0.0793078	FALSE	846	FALSE	0.117284	FALSE	349	FALSE
CIC	PPM1E	17	q22	0.101445	0.00577692	0.0794029	FALSE	847	FALSE	0.117284	FALSE	350	FALSE
CIC	TMEM256	17	p13.1	0.101358	0.005819	0.0798294	FALSE	848	FALSE	0.117809	FALSE	351	FALSE
CIC	ESS2	22	q11.21	0.101287	0.00585355	0.0800844	FALSE	849	FALSE	0.118029	FALSE	352	FALSE
CIC	MAGED1	X	p11.22	0.101217	0.0081163	0.097316	FALSE	850	FALSE	0.137961	FALSE	353	FALSE
CIC	C16orf87	16	q11.2	0.101188	0.00590231	0.0805712	FALSE	851	FALSE	0.11859	FALSE	354	FALSE
CIC	CAMK4	5	q22.1	0.101061	0.00596533	0.0810546	FALSE	852	FALSE	0.11894	FALSE	355	FALSE
CIC	CRX	19	q13.33	0.100993	0.00599923	0.0812906	FALSE	853	FALSE	NA	NA	NA	NA
CIC	STK25	2	q37.3	0.100961	0.00601509	0.0814437	FALSE	854	FALSE	0.119349	FALSE	356	FALSE
CIC	MSMO1	4	q32.3	0.100853	0.00606968	0.0818803	FALSE	855	FALSE	0.119829	FALSE	357	FALSE
CIC	RHPN2	19	q13.11	0.100826	0.00608316	0.081981	FALSE	856	FALSE	NA	NA	NA	NA
CIC	COX7A2	6	q14.1	0.10081	0.00609132	0.081981	FALSE	857	FALSE	0.119971	FALSE	358	FALSE
CIC	MRPL34	19	p13.11	0.100793	0.00609975	0.081981	FALSE	858	FALSE	NA	NA	NA	NA
CIC	MSANTD3	9	q31.1	0.100793	0.0060999	0.081981	FALSE	859	FALSE	0.119971	FALSE	359	FALSE
CIC	FOXN3	14	q32.11	0.100769	0.00611217	0.081981	FALSE	860	FALSE	0.119971	FALSE	360	FALSE
CIC	PPP5C	19	q13.32	0.100767	0.00611291	0.081981	FALSE	861	FALSE	NA	NA	NA	NA
CIC	CISD2	4	q24	0.100726	0.00613418	0.0821443	FALSE	862	FALSE	0.120264	FALSE	361	FALSE
CIC	LENG8	19	q13.42	0.10072	0.0061373	0.0821443	FALSE	863	FALSE	NA	NA	NA	NA
CIC	ACER1	19	p13.3	0.100717	0.00613853	0.0821443	FALSE	864	FALSE	NA	NA	NA	NA
CIC	KRTAP10-10	21	q22.3	0.100652	0.00617187	0.0825302	FALSE	865	FALSE	0.120861	FALSE	362	FALSE
CIC	KMT2B	19	q13.12	0.100647	0.00664585	0.0862878	FALSE	866	FALSE	NA	NA	NA	NA
CIC	MEF2B	19	p13.11	0.10061	0.0061936	0.0826076	FALSE	867	FALSE	NA	NA	NA	NA
CIC	BPI	20	q11.23	0.100609	0.006194	0.0826076	FALSE	868	FALSE	0.120861	FALSE	363	FALSE
CIC	SEMA3D	7	q21.11	0.100526	0.00623686	0.0828928	FALSE	869	FALSE	0.121075	FALSE	364	FALSE
CIC	HOXC10	12	q13.13	0.100379	0.00631338	0.0836463	FALSE	870	FALSE	0.121952	FALSE	365	FALSE
CIC	UNC119	17	q11.2	0.100377	0.00631465	0.0836463	FALSE	871	FALSE	0.121952	FALSE	366	FALSE
CIC	GSTM1	1	p13.3	0.100365	0.0063207	0.0836661	FALSE	872	FALSE	0.121952	FALSE	367	FALSE
CIC	CCNE1	19	q12	0.100295	0.00683964	0.0876249	FALSE	873	FALSE	NA	NA	NA	NA
CIC	NANOGNB	12	p13.31	0.100216	0.00639958	0.0844054	FALSE	874	FALSE	0.122777	FALSE	368	FALSE
CIC	HOXC11	12	q13.13	0.10011	0.00645571	0.0849136	FALSE	875	FALSE	0.123215	FALSE	369	FALSE
CIC	MIPOL1	14	q13.3	0.100018	0.00650532	0.0852666	FALSE	876	FALSE	0.123625	FALSE	370	FALSE
CIC	KCNJ14	19	q13.33	0.100006	0.00651138	0.0852666	FALSE	877	FALSE	NA	NA	NA	NA
CIC	NAV3	12	q21.2	0.0999497	0.00654199	0.0855451	FALSE	878	FALSE	0.123942	FALSE	371	FALSE
CIC	C3AR1	12	p13.31	0.0998519	0.00659511	0.0859333	FALSE	879	FALSE	0.124283	FALSE	372	FALSE
CIC	PSMB3	17	q12	0.0998345	0.00660458	0.0859955	FALSE	880	FALSE	0.124324	FALSE	373	FALSE
CIC	ARHGAP23	17	q12	0.0998092	0.00661842	0.0861147	FALSE	881	FALSE	0.124447	FALSE	374	FALSE
CIC	NFIC	19	p13.3	0.0997999	0.00662349	0.0861195	FALSE	882	FALSE	NA	NA	NA	NA
CIC	MRRF	9	q33.2	0.0997411	0.0066557	0.0863545	FALSE	883	FALSE	0.124871	FALSE	375	FALSE
CIC	U2AF1	21	q22.3	0.0997306	0.00716114	0.090453	FALSE	884	FALSE	0.129298	FALSE	376	FALSE
CIC	ZNF665	19	q13.42	0.0997222	0.00666608	0.0863752	FALSE	885	FALSE	NA	NA	NA	NA
CIC	TNNT3	11	p15.5	0.0997174	0.00666872	0.0863752	FALSE	886	FALSE	0.124891	FALSE	377	FALSE
CIC	GRIN2D	19	q13.33	0.0996782	0.00669031	0.0865586	FALSE	887	FALSE	NA	NA	NA	NA
CIC	ATF5	19	q13.33	0.0996283	0.00671792	0.0866638	FALSE	888	FALSE	NA	NA	NA	NA
CIC	ATG101	12	q13.13	0.0996158	0.00672487	0.0866638	FALSE	889	FALSE	0.125238	FALSE	378	FALSE
CIC	ZCCHC9	5	q14.1	0.0996154	0.00672509	0.0866638	FALSE	890	FALSE	0.125238	FALSE	379	FALSE
CIC	GCDH	19	p13.13	0.0995406	0.00676667	0.0871161	FALSE	891	FALSE	NA	NA	NA	NA
CIC	CLDN2	X	q22.3	0.0995361	0.00869143	0.10207	FALSE	892	FALSE	0.144217	FALSE	380	FALSE
CIC	FAM169B	15	q26.3	0.0995265	0.00677454	0.0871198	FALSE	893	FALSE	0.125887	FALSE	381	FALSE
CIC	SLC16A3	17	q25.3	0.0994866	0.00679683	0.0873199	FALSE	894	FALSE	0.126077	FALSE	382	FALSE
CIC	UBQLN1	9	q21.32	0.0994782	0.00680155	0.0873199	FALSE	895	FALSE	0.126077	FALSE	383	FALSE
CIC	POLA1	X	p22.11	0.0994678	0.00873774	0.102423	FALSE	896	FALSE	0.144619	FALSE	384	FALSE
CIC	STXBP2	19	p13.2	0.0993972	0.00684702	0.0876358	FALSE	897	FALSE	NA	NA	NA	NA
CIC	OTUD5	X	p11.23	0.0993741	0.00880155	0.103105	FALSE	898	FALSE	0.145534	FALSE	385	FALSE
CIC	NPEPPS	17	q21.32	0.0993733	0.00686048	0.0876358	FALSE	899	FALSE	0.126366	FALSE	386	FALSE
CIC	ABCC1	16	p13.11	0.0991884	0.0069656	0.0886942	FALSE	900	FALSE	0.127745	FALSE	387	FALSE
CIC	ULK1	12	q24.33	0.0991865	0.00696665	0.0886942	FALSE	901	FALSE	0.127745	FALSE	388	FALSE
CIC	NPBWR1	8	q11.23	0.0991326	0.00699759	0.0889574	FALSE	902	FALSE	0.127928	FALSE	389	FALSE
CIC	PGD	1	p36.22	0.0991167	0.00700674	0.0889574	FALSE	903	FALSE	0.127928	FALSE	390	FALSE
CIC	TRIP12	2	q36.3	0.0990915	0.00754147	0.093164	FALSE	904	FALSE	0.132702	FALSE	391	FALSE
CIC	IER5L	9	q34.11	0.0990361	0.00705322	0.0894238	FALSE	905	FALSE	0.1285	FALSE	392	FALSE
CIC	SLC7A6	16	q22.1	0.0990081	0.00706946	0.0895677	FALSE	906	FALSE	0.128658	FALSE	393	FALSE
CIC	KRTAP17-1	17	q21.2	0.0989579	0.00709857	0.0898339	FALSE	907	FALSE	0.128943	FALSE	394	FALSE
CIC	ZHX3	20	q12	0.0987917	0.0071959	0.090453	FALSE	908	FALSE	0.129298	FALSE	395	FALSE
CIC	ATG14	14	q22.3	0.0987822	0.0072015	0.090453	FALSE	909	FALSE	0.129298	FALSE	396	FALSE
CIC	PRR14	16	p11.2	0.0987789	0.00720348	0.090453	FALSE	910	FALSE	0.129298	FALSE	397	FALSE
CIC	RAPGEF3	12	q13.11	0.098762	0.00721341	0.0905157	FALSE	911	FALSE	0.129339	FALSE	398	FALSE
CIC	RNASEH2A	19	p13.13	0.0987214	0.00723743	0.090755	FALSE	912	FALSE	NA	NA	NA	NA
CIC	CETN3	5	q14.3	0.0986345	0.00728907	0.0912154	FALSE	913	FALSE	0.130283	FALSE	399	FALSE
CIC	SEZ6L2	16	p11.2	0.0986058	0.00730616	0.0913669	FALSE	914	FALSE	0.130452	FALSE	400	FALSE
CIC	SNURF	15	q11.2	0.0985445	0.00734283	0.0917004	FALSE	915	FALSE	0.130832	FALSE	401	FALSE
CIC	MTM1	X	q28	0.0985039	0.00941472	0.106675	FALSE	916	FALSE	0.149144	FALSE	402	FALSE
CIC	LAMP5	20	p12.2	0.0984995	0.0073699	0.0919758	FALSE	917	FALSE	0.131133	FALSE	403	FALSE
CIC	TAS2R8	12	p13.2	0.0984793	0.00738203	0.0919839	FALSE	918	FALSE	0.131133	FALSE	404	FALSE
CIC	MARK4	19	q13.32	0.098466	0.00739007	0.0919839	FALSE	919	FALSE	NA	NA	NA	NA
CIC	PMAIP1	18	q21.32	0.0984512	0.00739899	0.0920256	FALSE	920	FALSE	0.131145	FALSE	405	FALSE
CIC	IRGC	19	q13.31	0.0984046	0.00742721	0.092314	FALSE	921	FALSE	NA	NA	NA	NA
CIC	NPL	1	q25.3	0.0983588	0.00745502	0.0925558	FALSE	922	FALSE	0.131798	FALSE	406	FALSE
CIC	BBS2	16	q13	0.0982842	0.00750049	0.0928471	FALSE	923	FALSE	0.132117	FALSE	407	FALSE
CIC	HAPLN4	19	p13.11	0.0982695	0.00750948	0.0928956	FALSE	924	FALSE	NA	NA	NA	NA
CIC	TPM4	19	p13.12	0.0982138	0.00754364	0.093164	FALSE	925	FALSE	NA	NA	NA	NA
CIC	MAMSTR	19	q13.33	0.0982023	0.00755074	0.093164	FALSE	926	FALSE	NA	NA	NA	NA
CIC	ALDH5A1	6	p22.3	0.0981167	0.0076035	0.0936795	FALSE	927	FALSE	0.133379	FALSE	408	FALSE
CIC	NUCB1	19	q13.33	0.0980351	0.00765419	0.0942407	FALSE	928	FALSE	NA	NA	NA	NA
CIC	TRMT1	19	p13.13	0.0980171	0.00766538	0.0942771	FALSE	929	FALSE	NA	NA	NA	NA
CIC	ABCB6	2	q35	0.0979226	0.00772449	0.094702	FALSE	930	FALSE	0.134678	FALSE	409	FALSE
CIC	OR2G3	1	q44	0.0979167	0.00772817	0.094702	FALSE	931	FALSE	0.134678	FALSE	410	FALSE
CIC	CRNKL1	20	p11.23	0.097849	0.0077708	0.0950076	FALSE	932	FALSE	0.135198	FALSE	411	FALSE
CIC	KIR2DL3	19	q13.42	0.0978409	0.00777594	0.0950076	FALSE	933	FALSE	NA	NA	NA	NA
CIC	NOVA2	19	q13.32	0.097835	0.00777965	0.0950076	FALSE	934	FALSE	NA	NA	NA	NA
CIC	ZNF526	19	q13.2	0.097834	0.00778028	0.0950076	FALSE	935	FALSE	NA	NA	NA	NA
CIC	PARVB	22	q13.31	0.0978262	0.00778519	0.0950076	FALSE	936	FALSE	0.135238	FALSE	412	FALSE
CIC	BORCS8	19	p13.11	0.0977907	0.00780769	0.0951035	FALSE	937	FALSE	NA	NA	NA	NA
CIC	OR2Z1	19	p13.2	0.097717	0.00785452	0.095455	FALSE	938	FALSE	NA	NA	NA	NA
CIC	VPS16	20	p13	0.0976589	0.00789158	0.0956222	FALSE	939	FALSE	0.135908	FALSE	413	FALSE
CIC	MEA1	6	p21.1	0.0976262	0.00791258	0.0958133	FALSE	940	FALSE	0.136132	FALSE	414	FALSE
CIC	THBD	20	p11.21	0.0975945	0.00793288	0.0959957	FALSE	941	FALSE	0.136343	FALSE	415	FALSE
CIC	ZFP28	19	q13.43	0.0975319	0.00797324	0.0963247	FALSE	942	FALSE	NA	NA	NA	NA
CIC	LRG1	19	p13.3	0.0975279	0.00797583	0.0963247	FALSE	943	FALSE	NA	NA	NA	NA
CIC	LACTB	15	q22.2	0.0975082	0.00798857	0.0964002	FALSE	944	FALSE	0.136954	FALSE	416	FALSE
CIC	TGFBR1	9	q22.33	0.097502	0.0079926	0.0964002	FALSE	945	FALSE	0.136954	FALSE	417	FALSE
CIC	PCP2	19	p13.2	0.097452	0.00802498	0.0965775	FALSE	946	FALSE	NA	NA	NA	NA
CIC	MTFP1	22	q12.2	0.0974338	0.00803683	0.0966158	FALSE	947	FALSE	0.137159	FALSE	418	FALSE
CIC	B3GALNT2	1	q42.3	0.0973292	0.00810508	0.0972451	FALSE	948	FALSE	0.137908	FALSE	419	FALSE
CIC	KLK7	19	q13.41	0.0972879	0.00813221	0.097443	FALSE	949	FALSE	NA	NA	NA	NA
CIC	CLEC4G	19	p13.2	0.0972401	0.00816363	0.0976918	FALSE	950	FALSE	NA	NA	NA	NA
CIC	CFAP221	2	q14.2	0.0972218	0.00817573	0.0977727	FALSE	951	FALSE	0.138599	FALSE	420	FALSE
CIC	CUL1	7	q36.1	0.0971975	0.00819179	0.0978068	FALSE	952	FALSE	0.138599	FALSE	421	FALSE
CIC	LSM14B	20	q13.33	0.0971933	0.00819458	0.0978068	FALSE	953	FALSE	0.138599	FALSE	422	FALSE
CIC	RSRP1	1	p36.11	0.0971567	0.00821882	0.0980323	FALSE	954	FALSE	0.13887	FALSE	423	FALSE
CIC	PRAMEF13	1	p36.21	0.0970265	0.00830563	0.0988748	FALSE	955	FALSE	0.13992	FALSE	424	FALSE
CIC	MYLK3	16	q11.2	0.0970057	0.00831958	0.0989766	FALSE	956	FALSE	0.140016	FALSE	425	FALSE
CIC	NDUFB7	19	p13.12	0.0969961	0.00832601	0.0989888	FALSE	957	FALSE	NA	NA	NA	NA
CIC	DLG3	X	q13.1	0.0969236	0.0106262	0.114864	FALSE	958	FALSE	0.15857	FALSE	426	FALSE
CIC	MBD3L2	19	p13.2	0.0968744	0.00900486	0.104463	FALSE	959	FALSE	NA	NA	NA	NA
CIC	SLC6A16	19	q13.33	0.0968222	0.00844344	0.100021	FALSE	960	FALSE	NA	NA	NA	NA
CIC	SUGP2	19	p13.11	0.0967946	0.00846224	0.100021	FALSE	961	FALSE	NA	NA	NA	NA
CIC	ZNF799	19	p13.2	0.0967895	0.00846568	0.100021	FALSE	962	FALSE	NA	NA	NA	NA
CIC	BZW1	2	q33.1	0.096787	0.00846742	0.100021	FALSE	963	FALSE	0.141523	FALSE	427	FALSE
CIC	ASCL2	11	p15.5	0.0966885	0.00853473	0.100687	FALSE	964	FALSE	0.142368	FALSE	428	FALSE
CIC	TEKT5	16	p13.13	0.0965946	0.0085994	0.101384	FALSE	965	FALSE	0.143306	FALSE	429	FALSE
CIC	MTMR1	X	q28	0.0965851	0.010903	0.116482	FALSE	966	FALSE	0.160457	FALSE	430	FALSE
CIC	TXN	9	q31.3	0.0965688	0.0086172	0.101529	FALSE	967	FALSE	0.143462	FALSE	431	FALSE
CIC	RLN3	19	p13.12	0.0964831	0.00867675	0.10207	FALSE	968	FALSE	NA	NA	NA	NA
CIC	SEMA6B	19	p13.3	0.0964657	0.00868883	0.10207	FALSE	969	FALSE	NA	NA	NA	NA
CIC	PRDM4	12	q23.3	0.0964635	0.00930232	0.10594	FALSE	970	FALSE	0.148074	FALSE	432	FALSE
CIC	NPEPL1	20	q13.32	0.0964593	0.00869331	0.10207	FALSE	971	FALSE	0.144217	FALSE	433	FALSE
CIC	ZNF786	7	q36.1	0.096268	0.00882764	0.10324	FALSE	972	FALSE	0.14558	FALSE	434	FALSE
CIC	KRTAP10-4	21	q22.3	0.0962647	0.00883003	0.10324	FALSE	973	FALSE	0.14558	FALSE	435	FALSE
CIC	BABAM2	2	p23.2	0.0962554	0.0094563	0.106964	FALSE	974	FALSE	0.149346	FALSE	436	FALSE
CIC	BTG2	1	q32.1	0.0962072	0.00887076	0.103533	FALSE	975	FALSE	0.145832	FALSE	437	FALSE
CIC	PRKAR2B	7	q22.3	0.0962055	0.00887198	0.103533	FALSE	976	FALSE	0.145832	FALSE	438	FALSE
CIC	KCNN1	19	p13.11	0.0960892	0.00895493	0.104238	FALSE	977	FALSE	NA	NA	NA	NA
CIC	ZNF746	7	q36.1	0.0960889	0.00895516	0.104238	FALSE	978	FALSE	0.146624	FALSE	439	FALSE
CIC	REC114	15	q24.1	0.0960445	0.00898697	0.104437	FALSE	979	FALSE	0.146624	FALSE	440	FALSE
CIC	C1orf43	1	q21.3	0.0960333	0.00899502	0.104437	FALSE	980	FALSE	0.146624	FALSE	441	FALSE
CIC	TNFSF15	9	q32	0.0960144	0.00900866	0.104463	FALSE	981	FALSE	0.146624	FALSE	442	FALSE
CIC	SCN1B	19	q13.11	0.0959647	0.00904446	0.104499	FALSE	982	FALSE	NA	NA	NA	NA
CIC	GRIN3A	9	q31.1	0.0959626	0.00904597	0.104499	FALSE	983	FALSE	0.146624	FALSE	443	FALSE
CIC	ORMDL3	17	q21.1	0.0958943	0.00909546	0.104567	FALSE	984	FALSE	0.146624	FALSE	444	FALSE
CIC	MT1M	16	q13	0.0958907	0.00909808	0.104567	FALSE	985	FALSE	0.146624	FALSE	445	FALSE
CIC	LILRA1	19	q13.42	0.0958876	0.00910033	0.104567	FALSE	986	FALSE	NA	NA	NA	NA
CIC	CCL19	9	p13.3	0.0958837	0.00910321	0.104567	FALSE	987	FALSE	0.146624	FALSE	446	FALSE
CIC	ALKAL1	8	q11.23	0.0958748	0.00910967	0.104576	FALSE	988	FALSE	0.146624	FALSE	447	FALSE
CIC	CLEC5A	7	q34	0.0957549	0.00919718	0.105185	FALSE	989	FALSE	0.147346	FALSE	448	FALSE
CIC	MDH2	7	q11.23	0.095735	0.00921184	0.105287	FALSE	990	FALSE	0.147441	FALSE	449	FALSE
CIC	B3GNT9	16	q22.1	0.0956332	0.00928689	0.10594	FALSE	991	FALSE	0.148074	FALSE	450	FALSE
CIC	PPP4R4	14	q32.12	0.095621	0.00929592	0.10594	FALSE	992	FALSE	0.148074	FALSE	451	FALSE
CIC	CADM4	19	q13.31	0.0955635	0.00933859	0.106175	FALSE	993	FALSE	NA	NA	NA	NA
CIC	CYP4F12	19	p13.12	0.0955593	0.00934168	0.106175	FALSE	994	FALSE	NA	NA	NA	NA
CIC	SSH2	17	q11.2	0.0955162	0.00937378	0.106408	FALSE	995	FALSE	0.148773	FALSE	452	FALSE
CIC	ICAM1	19	p13.2	0.0954803	0.00940057	0.10658	FALSE	996	FALSE	NA	NA	NA	NA
CIC	NDUFA8	9	q33.2	0.095397	0.00946308	0.106964	FALSE	997	FALSE	0.149346	FALSE	453	FALSE
CIC	KDELR1	19	q13.33	0.0953831	0.00947356	0.106964	FALSE	998	FALSE	NA	NA	NA	NA
CIC	ZDHHC1	16	q22.1	0.0953626	0.00948897	0.106987	FALSE	999	FALSE	0.149346	FALSE	454	FALSE
CIC	HSPA5	9	q33.3	0.0952914	0.00954281	0.10744	FALSE	1000	FALSE	0.149916	FALSE	455	FALSE
CIC	ZNF99	19	p12	0.0952863	0.00954671	0.10744	FALSE	1001	FALSE	NA	NA	NA	NA
CIC	FKBP3	14	q21.2	0.095267	0.00956135	0.107539	FALSE	1002	FALSE	0.150068	FALSE	456	FALSE
CIC	PIWIL1	12	q24.33	0.0952372	0.00958401	0.107662	FALSE	1003	FALSE	0.150101	FALSE	457	FALSE
CIC	NDUFS2	1	q23.3	0.0952294	0.00958994	0.107662	FALSE	1004	FALSE	0.150101	FALSE	458	FALSE
CIC	CETN1	18	p11.32	0.0950251	0.00974655	0.109153	FALSE	1005	FALSE	0.151993	FALSE	459	FALSE
CIC	IL1RN	2	q14.1	0.0949848	0.00977771	0.109308	FALSE	1006	FALSE	0.152069	FALSE	460	FALSE
CIC	NOP14	4	p16.3	0.0949841	0.00977829	0.109308	FALSE	1007	FALSE	0.152069	FALSE	461	FALSE
CIC	SCX	8	q24.3	0.0949713	0.00978822	0.109353	FALSE	1008	FALSE	0.152084	FALSE	462	FALSE
CIC	HEBP2	6	q24.1	0.0949579	0.00979857	0.109401	FALSE	1009	FALSE	0.152106	FALSE	463	FALSE
CIC	BRD9	5	p15.33	0.0949117	0.0105062	0.114201	FALSE	1010	FALSE	0.157899	FALSE	464	FALSE
CIC	KRTAP2-2	17	q21.2	0.0948811	0.00985835	0.109868	FALSE	1011	FALSE	0.152616	FALSE	465	FALSE
CIC	ZNF580	19	q13.42	0.0948053	0.00991767	0.110328	FALSE	1012	FALSE	NA	NA	NA	NA
CIC	GFY	19	q13.33	0.0947209	0.00998407	0.110932	FALSE	1013	FALSE	NA	NA	NA	NA
CIC	MEGF8	19	q13.2	0.0947034	0.00999786	0.110951	FALSE	1014	FALSE	NA	NA	NA	NA
CIC	CLU	8	p21.1	0.0945752	0.0100996	0.11181	FALSE	1015	FALSE	0.15522	FALSE	466	FALSE
CIC	SH2D3A	19	p13.3	0.0945563	0.0101147	0.111908	FALSE	1016	FALSE	NA	NA	NA	NA
CIC	ZNF148	3	q21.2	0.094511	0.0101509	0.112174	FALSE	1017	FALSE	0.155703	FALSE	467	FALSE
CIC	MAGEC2	X	q27.2	0.0944904	0.0127625	0.126953	FALSE	1018	FALSE	0.171939	FALSE	468	FALSE
CIC	AHCTF1	1	q44	0.0944779	0.0101775	0.112264	FALSE	1019	FALSE	0.155703	FALSE	469	FALSE
CIC	CC2D1B	1	p32.3	0.0943958	0.0102435	0.112654	FALSE	1020	FALSE	0.15602	FALSE	470	FALSE
CIC	PHF5A	22	q13.2	0.0943957	0.0109361	0.116645	FALSE	1021	FALSE	0.160545	FALSE	471	FALSE
CIC	HLA-DRB5	6	p21.32	0.0943547	0.0102767	0.112884	FALSE	1022	FALSE	0.156247	FALSE	472	FALSE
CIC	ZNF584	19	q13.43	0.094305	0.0103171	0.113228	FALSE	1023	FALSE	NA	NA	NA	NA
CIC	SLC7A10	19	q13.11	0.0942894	0.0103297	0.113228	FALSE	1024	FALSE	NA	NA	NA	NA
CIC	ZNF154	19	q13.43	0.094278	0.010339	0.113228	FALSE	1025	FALSE	NA	NA	NA	NA
CIC	PRPSAP2	17	p11.2	0.0942657	0.010349	0.113271	FALSE	1026	FALSE	0.156925	FALSE	473	FALSE
CIC	ZNF135	19	q13.43	0.0941848	0.0104151	0.113655	FALSE	1027	FALSE	NA	NA	NA	NA
CIC	TAX1BP3	17	p13.2	0.0941705	0.0104268	0.113695	FALSE	1028	FALSE	0.157329	FALSE	474	FALSE
CIC	ZSCAN5B	19	q13.43	0.0940709	0.0105088	0.114201	FALSE	1029	FALSE	NA	NA	NA	NA
CIC	P2RX4	12	q24.31	0.0940445	0.0105306	0.114303	FALSE	1030	FALSE	0.157987	FALSE	475	FALSE
CIC	SMU1	9	p21.1	0.0940168	0.0105535	0.114484	FALSE	1031	FALSE	0.158191	FALSE	476	FALSE
CIC	GLRA3	4	q34.1	0.0939814	0.0105829	0.114667	FALSE	1032	FALSE	0.158353	FALSE	477	FALSE
CIC	RGS9BP	19	q13.11	0.0939515	0.0106078	0.114864	FALSE	1033	FALSE	NA	NA	NA	NA
CIC	GEMIN4	17	p13.3	0.0939442	0.0106139	0.114864	FALSE	1034	FALSE	0.15857	FALSE	478	FALSE
CIC	CCNYL1	2	q33.3	0.0939143	0.0106388	0.114922	FALSE	1035	FALSE	0.15857	FALSE	479	FALSE
CIC	ZNF740	12	q13.13	0.093908	0.0106441	0.114922	FALSE	1036	FALSE	0.15857	FALSE	480	FALSE
CIC	NLRP4	19	q13.43	0.0938858	0.0106626	0.115055	FALSE	1037	FALSE	NA	NA	NA	NA
CIC	ASB10	7	q36.1	0.0938211	0.0107169	0.115436	FALSE	1038	FALSE	0.159236	FALSE	481	FALSE
CIC	DCAF8L2	X	p21.3	0.0938137	0.0134203	0.13087	FALSE	1039	FALSE	0.176685	FALSE	482	FALSE
CIC	SLC30A9	4	p13	0.0937184	0.0108035	0.115975	FALSE	1040	FALSE	0.159705	FALSE	483	FALSE
CIC	DUXA	19	q13.43	0.0936467	0.0108643	0.116406	FALSE	1041	FALSE	NA	NA	NA	NA
CIC	DARS	NA	NA	0.0936415	0.0108687	0.116406	FALSE	1042	FALSE	0.16035	FALSE	484	FALSE
CIC	DDX39A	19	p13.12	0.0936346	0.0108746	0.116406	FALSE	1043	FALSE	NA	NA	NA	NA
CIC	POU6F1	12	q13.13	0.093632	0.0108768	0.116406	FALSE	1044	FALSE	0.16035	FALSE	485	FALSE
CIC	EVI2A	17	q11.2	0.0936207	0.0108864	0.116441	FALSE	1045	FALSE	0.160353	FALSE	486	FALSE
CIC	TJP3	19	p13.3	0.0936107	0.010895	0.116465	FALSE	1046	FALSE	NA	NA	NA	NA
CIC	MMP3	11	q22.2	0.0935612	0.0109373	0.116645	FALSE	1047	FALSE	0.160545	FALSE	487	FALSE
CIC	U2SURP	3	q23	0.0935053	0.0109851	0.116936	FALSE	1048	FALSE	0.160601	FALSE	488	FALSE
CIC	ASB4	7	q21.3	0.093497	0.0109923	0.116936	FALSE	1049	FALSE	0.160601	FALSE	489	FALSE
CIC	IP6K3	6	p21.31	0.0934839	0.0110036	0.116936	FALSE	1050	FALSE	0.160601	FALSE	490	FALSE
CIC	POLD1	19	q13.33	0.0934551	0.0110284	0.116936	FALSE	1051	FALSE	NA	NA	NA	NA
CIC	SIAH1	16	q12.1	0.0934462	0.011036	0.11695	FALSE	1052	FALSE	0.160608	FALSE	491	FALSE
CIC	MYH2	17	p13.1	0.0934347	0.0110459	0.116987	FALSE	1053	FALSE	0.160615	FALSE	492	FALSE
CIC	GPATCH1	19	q13.11	0.0933697	0.0111022	0.117438	FALSE	1054	FALSE	NA	NA	NA	NA
CIC	ZNF677	19	q13.42	0.0933598	0.0111107	0.117438	FALSE	1055	FALSE	NA	NA	NA	NA
CIC	LYRM7	5	q23.3	0.093331	0.0111357	0.117599	FALSE	1056	FALSE	0.161506	FALSE	493	FALSE
CIC	OR51Q1	11	p15.4	0.0932838	0.0111769	0.117901	FALSE	1057	FALSE	0.161812	FALSE	494	FALSE
CIC	WISP2	NA	NA	0.0932741	0.0111853	0.117919	FALSE	1058	FALSE	0.161812	FALSE	495	FALSE
CIC	PSMC3	11	p11.2	0.0932664	0.0119317	0.123794	FALSE	1059	FALSE	0.169096	FALSE	496	FALSE
CIC	PRKACG	9	q21.11	0.0932124	0.0112393	0.118216	FALSE	1060	FALSE	0.162025	FALSE	497	FALSE
CIC	NUMA1	11	q13.4	0.0931919	0.0112573	0.118269	FALSE	1061	FALSE	0.162025	FALSE	498	FALSE
CIC	CFAP47	X	p21.1	0.0931626	0.0140813	0.134873	FALSE	1062	FALSE	0.181008	FALSE	499	FALSE
CIC	ZNF350	19	q13.41	0.0930475	0.0121337	0.124353	FALSE	1063	FALSE	NA	NA	NA	NA
CIC	ITPRIPL2	16	p12.3	0.0930429	0.0113888	0.119377	FALSE	1064	FALSE	0.163364	FALSE	500	FALSE
CIC	LGALS7	19	q13.2	0.0930003	0.0114265	0.119704	FALSE	1065	FALSE	NA	NA	NA	NA
CIC	APOC4	19	q13.32	0.0929159	0.0115018	0.120356	FALSE	1066	FALSE	NA	NA	NA	NA
CIC	NF2	22	q12.2	0.0929013	0.0115149	0.120424	FALSE	1067	FALSE	0.164895	FALSE	501	FALSE
CIC	RAN	12	q24.33	0.0928913	0.0122797	0.124861	FALSE	1068	FALSE	0.169976	FALSE	502	FALSE
CIC	TADA1	1	q24.1	0.0928297	0.0123377	0.125242	FALSE	1069	FALSE	0.170476	FALSE	503	FALSE
CIC	INTS1	7	p22.3	0.0928228	0.0115854	0.121092	FALSE	1070	FALSE	0.165765	FALSE	504	FALSE
CIC	SERPINF2	17	p13.3	0.0927529	0.0116485	0.121682	FALSE	1071	FALSE	0.166527	FALSE	505	FALSE
CIC	ZNF217	20	q13.2	0.0927166	0.0124449	0.12585	FALSE	1072	FALSE	0.171003	FALSE	506	FALSE
CIC	PDRG1	20	q11.21	0.0926727	0.0117212	0.122302	FALSE	1073	FALSE	0.167286	FALSE	507	FALSE
CIC	TRAPPC3	1	p34.3	0.0925982	0.0117892	0.122872	FALSE	1074	FALSE	0.167974	FALSE	508	FALSE
CIC	DHX38	16	q22.2	0.0925872	0.0125684	0.126256	FALSE	1075	FALSE	0.171423	FALSE	509	FALSE
CIC	JOSD2	19	q13.33	0.0925777	0.0118079	0.122997	FALSE	1076	FALSE	NA	NA	NA	NA
CIC	KAT6A	8	p11.21	0.0925441	0.0126099	0.126363	FALSE	1077	FALSE	0.171649	FALSE	510	FALSE
CIC	HAUS8	19	p13.11	0.0925259	0.0118555	0.123422	FALSE	1078	FALSE	NA	NA	NA	NA
CIC	UGT2B4	4	q13.3	0.092488	0.0118903	0.123546	FALSE	1079	FALSE	0.168874	FALSE	511	FALSE
CIC	ARHGAP44	17	p12	0.0924843	0.0118938	0.123546	FALSE	1080	FALSE	0.168874	FALSE	512	FALSE
CIC	KRT18	12	q13.13	0.0924837	0.0118943	0.123546	FALSE	1081	FALSE	0.168874	FALSE	513	FALSE
CIC	DDX19B	16	q22.1	0.0924753	0.0119021	0.123556	FALSE	1082	FALSE	0.168874	FALSE	514	FALSE
CIC	TXNL1	18	q21.31	0.0924277	0.011946	0.123818	FALSE	1083	FALSE	0.169096	FALSE	515	FALSE
CIC	FYN	6	q21	0.0924261	0.0119475	0.123818	FALSE	1084	FALSE	0.169096	FALSE	516	FALSE
CIC	HOXB5	17	q21.32	0.0923832	0.0119873	0.123954	FALSE	1085	FALSE	0.169106	FALSE	517	FALSE
CIC	ZNF627	19	p13.2	0.0923822	0.0119882	0.123954	FALSE	1086	FALSE	NA	NA	NA	NA
CIC	KIAA1143	3	p21.31	0.0923703	0.0119992	0.123954	FALSE	1087	FALSE	0.169106	FALSE	518	FALSE
CIC	COX11	17	q22	0.0923669	0.0120024	0.123954	FALSE	1088	FALSE	0.169106	FALSE	519	FALSE
CIC	TFF2	21	q22.3	0.0923609	0.012008	0.123954	FALSE	1089	FALSE	0.169106	FALSE	520	FALSE
CIC	ZNF546	19	q13.2	0.0923424	0.0120251	0.124061	FALSE	1090	FALSE	NA	NA	NA	NA
CIC	MAGEA11	X	q28	0.092342	0.0149552	0.139742	FALSE	1091	FALSE	0.186754	FALSE	521	FALSE
CIC	SRA1	5	q31.3	0.0922993	0.0128473	0.127038	FALSE	1092	FALSE	0.171939	FALSE	522	FALSE
CIC	DNAAF3	19	q13.42	0.0922904	0.0120737	0.124353	FALSE	1093	FALSE	NA	NA	NA	NA
CIC	SBK2	19	q13.42	0.0922854	0.0120783	0.124353	FALSE	1094	FALSE	NA	NA	NA	NA
CIC	PRR13	12	q13.13	0.0922629	0.0120993	0.124353	FALSE	1095	FALSE	0.169616	FALSE	523	FALSE
CIC	CPNE8	12	q12	0.0922561	0.0121057	0.124353	FALSE	1096	FALSE	0.169616	FALSE	524	FALSE
CIC	ATP5F1D	19	p13.3	0.0922264	0.0121335	0.124353	FALSE	1097	FALSE	NA	NA	NA	NA
CIC	A2ML1	12	p13.31	0.0921644	0.0121918	0.124466	FALSE	1098	FALSE	0.169616	FALSE	525	FALSE
CIC	PAQR6	1	q22	0.0921639	0.0121923	0.124466	FALSE	1099	FALSE	0.169616	FALSE	526	FALSE
CIC	GRK7	3	q23	0.0921628	0.0121933	0.124466	FALSE	1100	FALSE	0.169616	FALSE	527	FALSE
CIC	MINK1	17	p13.2	0.0921488	0.0122065	0.124466	FALSE	1101	FALSE	0.169616	FALSE	528	FALSE
CIC	ZNF726	19	p12	0.0921439	0.0122111	0.124466	FALSE	1102	FALSE	NA	NA	NA	NA
CIC	RNF10	12	q24.31	0.0921429	0.0122121	0.124466	FALSE	1103	FALSE	0.169616	FALSE	529	FALSE
CIC	CSNK2A3	11	p15.4	0.0921411	0.0122138	0.124466	FALSE	1104	FALSE	0.169616	FALSE	530	FALSE
CIC	PAQR9	3	q23	0.0920865	0.0122654	0.124861	FALSE	1105	FALSE	0.169976	FALSE	531	FALSE
CIC	CDC6	17	q21.2	0.0920573	0.0122931	0.124927	FALSE	1106	FALSE	0.170022	FALSE	532	FALSE
CIC	PLPPR2	19	p13.2	0.0920395	0.0123099	0.125029	FALSE	1107	FALSE	NA	NA	NA	NA
CIC	POGK	1	q24.1	0.0920017	0.0123459	0.125256	FALSE	1108	FALSE	0.170476	FALSE	533	FALSE
CIC	HMGN4	6	p22.2	0.0919793	0.0131635	0.129259	FALSE	1109	FALSE	0.174808	FALSE	534	FALSE
CIC	MARK1	1	q41	0.0919707	0.0123755	0.125417	FALSE	1110	FALSE	0.170607	FALSE	535	FALSE
CIC	HOXD11	2	q31.1	0.0919108	0.0124327	0.12585	FALSE	1111	FALSE	0.171003	FALSE	536	FALSE
CIC	RALGAPA2	20	p11.23	0.0918979	0.0124452	0.12585	FALSE	1112	FALSE	0.171003	FALSE	537	FALSE
CIC	PEX26	22	q11.21	0.0918898	0.0124529	0.12585	FALSE	1113	FALSE	0.171003	FALSE	538	FALSE
CIC	FGF22	19	p13.3	0.0918831	0.0124593	0.12585	FALSE	1114	FALSE	NA	NA	NA	NA
CIC	LAPTM4A	2	p24.1	0.0918372	0.0125035	0.126	FALSE	1115	FALSE	0.171167	FALSE	539	FALSE
CIC	RAB11B	19	p13.2	0.091832	0.0125085	0.126	FALSE	1116	FALSE	NA	NA	NA	NA
CIC	SMARCD1	12	q13.12	0.091832	0.0133115	0.130154	FALSE	1117	FALSE	0.175811	FALSE	540	FALSE
CIC	ENTPD4	8	p21.3	0.091809	0.0125307	0.126084	FALSE	1118	FALSE	0.171219	FALSE	541	FALSE
CIC	JAK3	19	p13.11	0.0917897	0.0125493	0.126202	FALSE	1119	FALSE	NA	NA	NA	NA
CIC	SALL1	16	q12.1	0.091751	0.0133934	0.130746	FALSE	1120	FALSE	0.176618	FALSE	542	FALSE
CIC	SIGLEC8	19	q13.41	0.091748	0.0125897	0.126331	FALSE	1121	FALSE	NA	NA	NA	NA
CIC	MYPOP	19	q13.32	0.0917234	0.0126135	0.126363	FALSE	1122	FALSE	NA	NA	NA	NA
CIC	NDUFB2	7	q34	0.0916904	0.0126456	0.126477	FALSE	1123	FALSE	0.171685	FALSE	543	FALSE
CIC	OR52N2	11	p15.4	0.0916776	0.012658	0.126532	FALSE	1124	FALSE	0.171717	FALSE	544	FALSE
CIC	KRTAP26-1	21	q22.11	0.0916654	0.0126699	0.126582	FALSE	1125	FALSE	0.171741	FALSE	545	FALSE
CIC	SELPLG	12	q24.11	0.0916397	0.012695	0.126763	FALSE	1126	FALSE	0.17182	FALSE	546	FALSE
CIC	CDC26	9	q32	0.0916322	0.0127023	0.126767	FALSE	1127	FALSE	0.17182	FALSE	547	FALSE
CIC	FCGR2A	1	q23.3	0.0916114	0.0127226	0.126799	FALSE	1128	FALSE	0.17182	FALSE	548	FALSE
CIC	TNIP1	5	q33.1	0.0915928	0.0127408	0.126815	FALSE	1129	FALSE	0.17188	FALSE	549	FALSE
CIC	ATG4D	19	p13.2	0.0915919	0.0127417	0.126815	FALSE	1130	FALSE	NA	NA	NA	NA
CIC	AP1M2	19	p13.2	0.0915269	0.0128055	0.127038	FALSE	1131	FALSE	NA	NA	NA	NA
CIC	TMEM174	5	q13.2	0.0915155	0.0128167	0.127038	FALSE	1132	FALSE	0.171939	FALSE	550	FALSE
CIC	TMED7	5	q22.3	0.091498	0.012834	0.127038	FALSE	1133	FALSE	0.171939	FALSE	551	FALSE
CIC	KPNA2	17	q24.2	0.0914969	0.012835	0.127038	FALSE	1134	FALSE	0.171939	FALSE	552	FALSE
CIC	C19orf81	19	q13.33	0.0914959	0.0128361	0.127038	FALSE	1135	FALSE	NA	NA	NA	NA
CIC	MAP1S	19	p13.11	0.0914549	0.0128765	0.127122	FALSE	1136	FALSE	NA	NA	NA	NA
CIC	PAX6	11	p13	0.0913407	0.0129899	0.128103	FALSE	1137	FALSE	0.173314	FALSE	553	FALSE
CIC	DDX60L	4	q32.3	0.0913069	0.0130236	0.128298	FALSE	1138	FALSE	0.173456	FALSE	554	FALSE
CIC	SORBS1	10	q24.1	0.0912993	0.0130311	0.128303	FALSE	1139	FALSE	0.173456	FALSE	555	FALSE
CIC	BAP1	3	p21.1	0.0912777	0.0138813	0.133884	FALSE	1140	FALSE	0.17982	FALSE	556	FALSE
CIC	C19orf66	NA	NA	0.0912002	0.0131305	0.129024	FALSE	1141	FALSE	NA	NA	NA	NA
CIC	UBA52	19	p13.11	0.0911981	0.0131326	0.129024	FALSE	1142	FALSE	NA	NA	NA	NA
CIC	KIF1C	17	p13.2	0.091135	0.0131962	0.12951	FALSE	1143	FALSE	0.175104	FALSE	557	FALSE
CIC	TCP1	6	q25.3	0.0911216	0.0132098	0.12954	FALSE	1144	FALSE	0.175148	FALSE	558	FALSE
CIC	IQCN	19	p13.11	0.0911181	0.0132133	0.12954	FALSE	1145	FALSE	NA	NA	NA	NA
CIC	SAMM50	22	q13.31	0.0910628	0.0132693	0.12995	FALSE	1146	FALSE	0.175663	FALSE	559	FALSE
CIC	CCL4	17	q12	0.090988	0.0133455	0.130417	FALSE	1147	FALSE	0.176123	FALSE	560	FALSE
CIC	TTYH1	19	q13.42	0.0909778	0.0133559	0.130449	FALSE	1148	FALSE	NA	NA	NA	NA
CIC	RPEL1	10	q24.33	0.0908731	0.0134632	0.131009	FALSE	1149	FALSE	0.176716	FALSE	561	FALSE
CIC	SOD2	6	q25.3	0.0907728	0.0135666	0.131875	FALSE	1150	FALSE	0.177773	FALSE	562	FALSE
CIC	DCUN1D3	16	p12.3	0.0907646	0.0135751	0.131888	FALSE	1151	FALSE	0.177773	FALSE	563	FALSE
CIC	USP3	15	q22.31	0.0907457	0.0144483	0.136907	FALSE	1152	FALSE	0.183259	FALSE	564	FALSE
CIC	ZNF853	7	p22.1	0.0906734	0.0136699	0.132598	FALSE	1153	FALSE	0.178601	FALSE	565	FALSE
CIC	TRMO	9	q22.33	0.0906324	0.0137126	0.132942	FALSE	1154	FALSE	0.179023	FALSE	566	FALSE
CIC	KDM1A	1	p36.12	0.0905959	0.0146115	0.137936	FALSE	1155	FALSE	0.184385	FALSE	567	FALSE
CIC	CASP2	7	q34	0.0905668	0.0137813	0.133326	FALSE	1156	FALSE	0.179369	FALSE	568	FALSE
CIC	CDH22	20	q13.12	0.0905349	0.0138149	0.13358	FALSE	1157	FALSE	0.179667	FALSE	569	FALSE
CIC	LY6E	8	q24.3	0.0904816	0.013871	0.133884	FALSE	1158	FALSE	0.17982	FALSE	570	FALSE
CIC	ZCCHC24	10	q22.3	0.0904662	0.0138872	0.133884	FALSE	1159	FALSE	0.17982	FALSE	571	FALSE
CIC	FCHO1	19	p13.11	0.0904354	0.0139198	0.13403	FALSE	1160	FALSE	NA	NA	NA	NA
CIC	POLK	5	q13.3	0.0904012	0.0139561	0.134206	FALSE	1161	FALSE	0.180142	FALSE	572	FALSE
CIC	RBBP8NL	20	q13.33	0.0903712	0.0139879	0.13426	FALSE	1162	FALSE	0.180142	FALSE	573	FALSE
CIC	CCDC130	NA	NA	0.0903646	0.013995	0.13426	FALSE	1163	FALSE	NA	NA	NA	NA
CIC	LILRA4	19	q13.42	0.0903497	0.0140109	0.134342	FALSE	1164	FALSE	NA	NA	NA	NA
CIC	ZNF577	19	q13.41	0.0902324	0.0141362	0.135261	FALSE	1165	FALSE	NA	NA	NA	NA
CIC	FAM173A	NA	NA	0.0900916	0.014288	0.135985	FALSE	1166	FALSE	0.18213	FALSE	574	FALSE
CIC	HAMP	19	q13.12	0.0900572	0.0143254	0.136147	FALSE	1167	FALSE	NA	NA	NA	NA
CIC	EEF2	19	p13.3	0.089993	0.0143953	0.136669	FALSE	1168	FALSE	NA	NA	NA	NA
CIC	KIF11	10	q23.33	0.0899666	0.0144241	0.136873	FALSE	1169	FALSE	0.183259	FALSE	575	FALSE
CIC	NARS	NA	NA	0.089957	0.0144346	0.136901	FALSE	1170	FALSE	0.183259	FALSE	576	FALSE
CIC	SKA3	13	q12.11	0.0899149	0.0144807	0.137004	FALSE	1171	FALSE	0.183305	FALSE	577	FALSE
CIC	PPP1R16A	8	q24.3	0.089913	0.0144828	0.137004	FALSE	1172	FALSE	0.183305	FALSE	578	FALSE
CIC	TRMT44	4	p16.1	0.08987	0.0145299	0.137308	FALSE	1173	FALSE	0.183603	FALSE	579	FALSE
CIC	SIPA1L3	19	q13.13	0.0897703	0.01464	0.138134	FALSE	1174	FALSE	NA	NA	NA	NA
CIC	TAOK1	17	q11.2	0.0897568	0.0146549	0.138204	FALSE	1175	FALSE	0.184782	FALSE	580	FALSE
CIC	ZNF639	3	q26.33	0.089748	0.0146647	0.138225	FALSE	1176	FALSE	0.184782	FALSE	581	FALSE
CIC	MRPL4	19	p13.2	0.0897044	0.0147131	0.13861	FALSE	1177	FALSE	NA	NA	NA	NA
CIC	SUFU	10	q24.32	0.0896993	0.0156231	0.143496	FALSE	1178	FALSE	0.191327	FALSE	582	FALSE
CIC	TMEM214	2	p23.3	0.0896661	0.0147557	0.13888	FALSE	1179	FALSE	0.185669	FALSE	583	FALSE
CIC	KIAA1324	NA	NA	0.089645	0.0147793	0.139019	FALSE	1180	FALSE	0.185812	FALSE	584	FALSE
CIC	KRTDAP	19	q13.12	0.0896221	0.0148049	0.139167	FALSE	1181	FALSE	NA	NA	NA	NA
CIC	IGFL3	19	q13.32	0.0896174	0.0148101	0.139167	FALSE	1182	FALSE	NA	NA	NA	NA
CIC	C2orf40	NA	NA	0.0895817	0.0148501	0.139399	FALSE	1183	FALSE	0.186427	FALSE	585	FALSE
CIC	CILP2	19	p13.11	0.0895393	0.0148976	0.139629	FALSE	1184	FALSE	NA	NA	NA	NA
CIC	GBF1	10	q24.32	0.0895308	0.0149072	0.139629	FALSE	1185	FALSE	0.186689	FALSE	586	FALSE
CIC	PTPA	9	q34.11	0.089524	0.0149149	0.139629	FALSE	1186	FALSE	0.186689	FALSE	587	FALSE
CIC	PCDHA11	5	q31.3	0.0895131	0.0149271	0.139629	FALSE	1187	FALSE	0.186704	FALSE	588	FALSE
CIC	ZNF112	19	q13.31	0.0895125	0.0149278	0.139629	FALSE	1188	FALSE	NA	NA	NA	NA
CIC	COL1A1	17	q21.33	0.0894803	0.0149641	0.139753	FALSE	1189	FALSE	0.186754	FALSE	589	FALSE
CIC	SLC35E3	12	q15	0.08946	0.014987	0.139896	FALSE	1190	FALSE	0.186846	FALSE	590	FALSE
CIC	PLSCR1	3	q24	0.0894436	0.0150056	0.139939	FALSE	1191	FALSE	0.186846	FALSE	591	FALSE
CIC	CYP7B1	8	q12.3	0.0894042	0.0150501	0.1402	FALSE	1192	FALSE	0.187141	FALSE	592	FALSE
CIC	DLL3	19	q13.2	0.0893942	0.0150616	0.140236	FALSE	1193	FALSE	NA	NA	NA	NA
CIC	PDCD7	15	q22.31	0.0893726	0.015086	0.140392	FALSE	1194	FALSE	0.18745	FALSE	593	FALSE
CIC	RASA2	3	q23	0.0893368	0.0151267	0.140699	FALSE	1195	FALSE	0.187819	FALSE	594	FALSE
CIC	CASP8	2	q33.1	0.089322	0.0151437	0.140785	FALSE	1196	FALSE	0.187892	FALSE	595	FALSE
CIC	ROR1	1	p31.3	0.0892848	0.0151861	0.141109	FALSE	1197	FALSE	0.188282	FALSE	596	FALSE
CIC	PDE12	3	p14.3	0.0892692	0.015204	0.141159	FALSE	1198	FALSE	0.188365	FALSE	597	FALSE
CIC	IZUMO2	19	q13.33	0.0892666	0.0152069	0.141159	FALSE	1199	FALSE	NA	NA	NA	NA
CIC	ZNF541	19	q13.33	0.0892392	0.0152384	0.141328	FALSE	1200	FALSE	NA	NA	NA	NA
CIC	GNG11	7	q21.3	0.0892373	0.0152405	0.141328	FALSE	1201	FALSE	0.188681	FALSE	598	FALSE
CIC	AMMECR1	X	q23	0.0892368	0.0187081	0.1574	FALSE	1202	FALSE	0.205559	FALSE	599	FALSE
CIC	CNN1	19	p13.2	0.0891875	0.0152977	0.141786	FALSE	1203	FALSE	NA	NA	NA	NA
CIC	PECR	2	q35	0.0891632	0.0153257	0.141902	FALSE	1204	FALSE	0.189459	FALSE	600	FALSE
CIC	XPO6	16	p12.1	0.0891399	0.0153526	0.142059	FALSE	1205	FALSE	0.189654	FALSE	601	FALSE
CIC	C19orf73	19	q13.33	0.089135	0.0153582	0.142059	FALSE	1206	FALSE	NA	NA	NA	NA
CIC	NDUFA3	19	q13.42	0.0891162	0.01538	0.142187	FALSE	1207	FALSE	NA	NA	NA	NA
CIC	VPS13C	15	q22.2	0.0890952	0.0154043	0.14227	FALSE	1208	FALSE	0.189902	FALSE	602	FALSE
CIC	FBXO33	14	q21.1	0.089081	0.0154207	0.142283	FALSE	1209	FALSE	0.189902	FALSE	603	FALSE
CIC	C12orf56	12	q14.2	0.0890777	0.0154246	0.142283	FALSE	1210	FALSE	0.189902	FALSE	604	FALSE
CIC	OR7D4	19	p13.2	0.0890605	0.0154444	0.142283	FALSE	1211	FALSE	NA	NA	NA	NA
CIC	PLLP	16	q13	0.089043	0.0154648	0.142399	FALSE	1212	FALSE	0.190073	FALSE	605	FALSE
CIC	TREX2	X	q28	0.0890181	0.0190009	0.158647	FALSE	1213	FALSE	0.206722	FALSE	606	FALSE
CIC	FOXL2NB	3	q22.3	0.0889816	0.0155362	0.142984	FALSE	1214	FALSE	0.190812	FALSE	607	FALSE
CIC	ARAF	X	p11.3	0.0889575	0.0190828	0.158804	FALSE	1215	FALSE	0.207	FALSE	608	FALSE
CIC	USP20	9	q34.11	0.088913	0.0156165	0.143496	FALSE	1216	FALSE	0.191327	FALSE	609	FALSE
CIC	CAPN14	2	p23.1	0.0888713	0.0156653	0.14374	FALSE	1217	FALSE	0.191568	FALSE	610	FALSE
CIC	SAAL1	11	p15.1	0.0888445	0.0156969	0.143886	FALSE	1218	FALSE	0.191678	FALSE	611	FALSE
CIC	CNOT4	7	q33	0.0888344	0.0157088	0.143922	FALSE	1219	FALSE	0.191685	FALSE	612	FALSE
CIC	ABCF1	6	p21.33	0.0888069	0.0157411	0.144147	FALSE	1220	FALSE	0.191942	FALSE	613	FALSE
CIC	DLGAP4	20	q11.23	0.0887968	0.0157531	0.144184	FALSE	1221	FALSE	0.19195	FALSE	614	FALSE
CIC	DHX8	17	q21.31	0.088746	0.0158132	0.144374	FALSE	1222	FALSE	0.191994	FALSE	615	FALSE
CIC	NANS	9	q22.33	0.0886959	0.0158726	0.144844	FALSE	1223	FALSE	0.192578	FALSE	616	FALSE
CIC	CSNK1D	17	q25.3	0.0886724	0.0159005	0.144964	FALSE	1224	FALSE	0.192674	FALSE	617	FALSE
CIC	TMCC2	1	q32.1	0.0886661	0.0159081	0.144964	FALSE	1225	FALSE	0.192674	FALSE	618	FALSE
CIC	USHBP1	19	p13.11	0.0886649	0.0159095	0.144964	FALSE	1226	FALSE	NA	NA	NA	NA
CIC	GPR173	X	p11.22	0.0886513	0.0195011	0.160828	FALSE	1227	FALSE	0.208876	FALSE	619	FALSE
CIC	SPRED1	15	q14	0.0886502	0.015927	0.145038	FALSE	1228	FALSE	0.192674	FALSE	620	FALSE
CIC	FCRLA	1	q23.3	0.0886316	0.0159492	0.145038	FALSE	1229	FALSE	0.192674	FALSE	621	FALSE
CIC	BST1	4	p15.32	0.0886227	0.0159599	0.145063	FALSE	1230	FALSE	0.192674	FALSE	622	FALSE
CIC	ZNF616	19	q13.41	0.0885964	0.0159913	0.145277	FALSE	1231	FALSE	NA	NA	NA	NA
CIC	DAO	12	q24.11	0.0885454	0.0160524	0.145661	FALSE	1232	FALSE	0.19344	FALSE	623	FALSE
CIC	DHRS9	2	q31.1	0.0885412	0.0160574	0.145661	FALSE	1233	FALSE	0.19344	FALSE	624	FALSE
CIC	GPC2	7	q22.1	0.0885213	0.0160813	0.14575	FALSE	1234	FALSE	0.193476	FALSE	625	FALSE
CIC	KCTD18	2	q33.1	0.0885198	0.0160832	0.14575	FALSE	1235	FALSE	0.193476	FALSE	626	FALSE
CIC	CDK12	17	q12	0.0884881	0.0170871	0.150411	FALSE	1236	FALSE	0.198094	FALSE	627	FALSE
CIC	ATG12	5	q22.3	0.0884643	0.01615	0.146139	FALSE	1237	FALSE	0.193868	FALSE	628	FALSE
CIC	CHMP2A	19	q13.43	0.0884356	0.0161847	0.146308	FALSE	1238	FALSE	NA	NA	NA	NA
CIC	PRPF40B	12	q13.12	0.0884206	0.0162027	0.1464	FALSE	1239	FALSE	0.194227	FALSE	629	FALSE
CIC	ATG3	3	q13.2	0.0883446	0.0162949	0.146943	FALSE	1240	FALSE	0.19476	FALSE	630	FALSE
CIC	MPP7	10	p12.1	0.0883368	0.0163045	0.146957	FALSE	1241	FALSE	0.19476	FALSE	631	FALSE
CIC	MARCKS	6	q21	0.088302	0.0163468	0.147193	FALSE	1242	FALSE	0.194991	FALSE	632	FALSE
CIC	SALL4	20	q13.2	0.0882912	0.01636	0.14724	FALSE	1243	FALSE	0.195012	FALSE	633	FALSE
CIC	ZNF551	19	q13.43	0.0882498	0.0164106	0.147623	FALSE	1244	FALSE	NA	NA	NA	NA
CIC	NXF3	X	q22.1	0.0882033	0.0201277	0.163765	FALSE	1245	FALSE	0.212143	FALSE	634	FALSE
CIC	COL15A1	9	q22.33	0.0881955	0.0164772	0.148092	FALSE	1246	FALSE	0.195863	FALSE	635	FALSE
CIC	PYCARD	16	p11.2	0.0881891	0.0164851	0.148092	FALSE	1247	FALSE	0.195863	FALSE	636	FALSE
CIC	PKIG	20	q13.12	0.0881875	0.016487	0.148092	FALSE	1248	FALSE	0.195863	FALSE	637	FALSE
CIC	KMT2E	7	q22.3	0.0881796	0.0174786	0.151703	FALSE	1249	FALSE	0.199145	FALSE	638	FALSE
CIC	GCSH	16	q23.2	0.0881743	0.0165033	0.148093	FALSE	1250	FALSE	0.195863	FALSE	639	FALSE
CIC	DHRS7C	17	p13.1	0.0881414	0.0165437	0.148119	FALSE	1251	FALSE	0.195863	FALSE	640	FALSE
CIC	LRRC24	8	q24.3	0.0880938	0.0166025	0.148402	FALSE	1252	FALSE	0.196114	FALSE	641	FALSE
CIC	DNMT1	19	p13.2	0.0880736	0.017615	0.152154	FALSE	1253	FALSE	NA	NA	NA	NA
CIC	FBXW9	19	p13.13	0.08806	0.0166442	0.148703	FALSE	1254	FALSE	NA	NA	NA	NA
CIC	EIF3I	1	p35.2	0.0880409	0.0166679	0.148824	FALSE	1255	FALSE	0.196686	FALSE	642	FALSE
CIC	BRAP	12	q24.12	0.088036	0.016674	0.148824	FALSE	1256	FALSE	0.196686	FALSE	643	FALSE
CIC	ZNF292	6	q14.3	0.0879591	0.0167697	0.149315	FALSE	1257	FALSE	0.197131	FALSE	644	FALSE
CIC	TAC1	7	q21.3	0.0879326	0.0168028	0.149465	FALSE	1258	FALSE	0.197248	FALSE	645	FALSE
CIC	LUC7L3	17	q21.33	0.0879064	0.0168355	0.14961	FALSE	1259	FALSE	0.197359	FALSE	646	FALSE
CIC	FKRP	19	q13.32	0.0878653	0.0168871	0.149778	FALSE	1260	FALSE	NA	NA	NA	NA
CIC	LYPD3	19	q13.31	0.0878002	0.0169689	0.150067	FALSE	1261	FALSE	NA	NA	NA	NA
CIC	SAP30BP	17	q25.1	0.0877999	0.0169693	0.150067	FALSE	1262	FALSE	0.197925	FALSE	647	FALSE
CIC	PDE4A	19	p13.2	0.0877651	0.0170132	0.150243	FALSE	1263	FALSE	NA	NA	NA	NA
CIC	NR2F2	15	q26.2	0.0877087	0.0170845	0.150411	FALSE	1264	FALSE	0.198094	FALSE	648	FALSE
CIC	DEPTOR	8	q24.12	0.0876828	0.0171174	0.150458	FALSE	1265	FALSE	0.198094	FALSE	649	FALSE
CIC	EPHA5	4	q13.2	0.087681	0.0171197	0.150458	FALSE	1266	FALSE	0.198094	FALSE	650	FALSE
CIC	TMOD4	1	q21.3	0.087637	0.0171756	0.150671	FALSE	1267	FALSE	0.198176	FALSE	651	FALSE
CIC	MYOF	10	q23.33	0.0876309	0.0171835	0.150671	FALSE	1268	FALSE	0.198176	FALSE	652	FALSE
CIC	PSG3	19	q13.2	0.0876195	0.0171979	0.150712	FALSE	1269	FALSE	NA	NA	NA	NA
CIC	ZCCHC10	5	q31.1	0.0875845	0.0172426	0.151031	FALSE	1270	FALSE	0.198705	FALSE	653	FALSE
CIC	ZNF714	19	p12	0.0875605	0.0172733	0.151156	FALSE	1271	FALSE	NA	NA	NA	NA
CIC	CD5L	1	q23.1	0.087522	0.0173226	0.151515	FALSE	1272	FALSE	0.199145	FALSE	654	FALSE
CIC	TGFBI	5	q31.1	0.0874961	0.0173559	0.151531	FALSE	1273	FALSE	0.199145	FALSE	655	FALSE
CIC	PGPEP1	19	p13.11	0.0874751	0.017383	0.1516	FALSE	1274	FALSE	NA	NA	NA	NA
CIC	CUL4B	X	q24	0.0874296	0.022307	0.172992	FALSE	1275	FALSE	0.221739	FALSE	656	FALSE
CIC	TMEM106C	12	q13.11	0.0874097	0.0174673	0.151703	FALSE	1276	FALSE	0.199145	FALSE	657	FALSE
CIC	C3orf80	3	q25.33	0.0874048	0.0174736	0.151703	FALSE	1277	FALSE	0.199145	FALSE	658	FALSE
CIC	TEKT1	17	p13.1	0.0873999	0.0174799	0.151703	FALSE	1278	FALSE	0.199145	FALSE	659	FALSE
CIC	RAX2	19	p13.3	0.0873962	0.0174847	0.151703	FALSE	1279	FALSE	NA	NA	NA	NA
CIC	LMCD1	3	p25.3	0.0873483	0.018573	0.156768	FALSE	1280	FALSE	0.205003	FALSE	660	FALSE
CIC	LENG1	19	q13.42	0.0873473	0.0175481	0.151964	FALSE	1281	FALSE	NA	NA	NA	NA
CIC	UGT1A6	2	q37.1	0.0873227	0.01758	0.152111	FALSE	1282	FALSE	0.199556	FALSE	661	FALSE
CIC	GTSF1L	20	q13.12	0.0873087	0.0175982	0.152111	FALSE	1283	FALSE	0.199556	FALSE	662	FALSE
CIC	SIGLECL1	19	q13.41	0.0872902	0.0176223	0.152154	FALSE	1284	FALSE	NA	NA	NA	NA
CIC	ZNF429	19	p12	0.0872804	0.017635	0.152154	FALSE	1285	FALSE	NA	NA	NA	NA
CIC	TRPM3	9	q21.13	0.0872517	0.0176725	0.152251	FALSE	1286	FALSE	0.199865	FALSE	663	FALSE
CIC	PALM3	19	p13.12	0.0872284	0.017703	0.152442	FALSE	1287	FALSE	NA	NA	NA	NA
CIC	MICAL3	22	q11.21	0.0872079	0.0177298	0.15253	FALSE	1288	FALSE	0.200302	FALSE	664	FALSE
CIC	ZNF574	19	q13.2	0.0872019	0.0177376	0.15253	FALSE	1289	FALSE	NA	NA	NA	NA
CIC	CACNG6	19	q13.42	0.0871812	0.0177648	0.152594	FALSE	1290	FALSE	NA	NA	NA	NA
CIC	ADORA2A	22	q11.23	0.0870386	0.0179527	0.153869	FALSE	1291	FALSE	0.201959	FALSE	665	FALSE
CIC	ZNF775	7	q36.1	0.0870053	0.0179968	0.154035	FALSE	1292	FALSE	0.202188	FALSE	666	FALSE
CIC	ZNF579	19	q13.42	0.087005	0.0179972	0.154035	FALSE	1293	FALSE	NA	NA	NA	NA
CIC	EIF3G	19	p13.2	0.0869863	0.018022	0.154143	FALSE	1294	FALSE	NA	NA	NA	NA
CIC	KCNK10	14	q31.3	0.0869633	0.0180526	0.154143	FALSE	1295	FALSE	0.202232	FALSE	667	FALSE
CIC	PNMA8A	19	q13.32	0.0869378	0.0180866	0.154295	FALSE	1296	FALSE	NA	NA	NA	NA
CIC	CLBA1	14	q32.33	0.0867974	0.0182744	0.155351	FALSE	1297	FALSE	0.203521	FALSE	668	FALSE
CIC	BPIFB4	20	q11.21	0.0867669	0.0183156	0.155453	FALSE	1298	FALSE	0.203615	FALSE	669	FALSE
CIC	MOV10	1	p13.2	0.0867396	0.0183524	0.155599	FALSE	1299	FALSE	0.203817	FALSE	670	FALSE
CIC	ZNF829	19	q13.12	0.0867352	0.0183582	0.155599	FALSE	1300	FALSE	NA	NA	NA	NA
CIC	FGF6	12	p13.32	0.0867099	0.0183925	0.155818	FALSE	1301	FALSE	0.20407	FALSE	671	FALSE
CIC	OR1L8	9	q33.2	0.0866313	0.018499	0.156483	FALSE	1302	FALSE	0.204786	FALSE	672	FALSE
CIC	CCDC92	12	q24.31	0.0866268	0.0185052	0.156483	FALSE	1303	FALSE	0.204786	FALSE	673	FALSE
CIC	AKAP12	6	q25.1	0.0865837	0.0185637	0.156761	FALSE	1304	FALSE	0.205003	FALSE	674	FALSE
CIC	MKKS	20	p12.2	0.0865621	0.0185932	0.156866	FALSE	1305	FALSE	0.205092	FALSE	675	FALSE
CIC	TBX18	6	q14.3	0.0865213	0.0197206	0.162009	FALSE	1306	FALSE	0.21009	FALSE	676	FALSE
CIC	AKT2	19	q13.2	0.0864719	0.0187167	0.157401	FALSE	1307	FALSE	NA	NA	NA	NA
CIC	GNG13	16	p13.3	0.0864552	0.0187396	0.157521	FALSE	1308	FALSE	0.205772	FALSE	677	FALSE
CIC	HNF4A	20	q13.12	0.0864462	0.018752	0.157553	FALSE	1309	FALSE	0.205774	FALSE	678	FALSE
CIC	AFG3L2	18	p11.21	0.0864375	0.018764	0.157581	FALSE	1310	FALSE	0.205774	FALSE	679	FALSE
CIC	STK16	2	q35	0.0863773	0.0188469	0.158061	FALSE	1311	FALSE	0.206284	FALSE	680	FALSE
CIC	PRR23B	3	q23	0.0863666	0.0188617	0.158112	FALSE	1312	FALSE	0.206294	FALSE	681	FALSE
CIC	CCSAP	1	q42.13	0.0863591	0.0188721	0.158127	FALSE	1313	FALSE	0.206294	FALSE	682	FALSE
CIC	FAF1	1	p32.3	0.0863146	0.0189337	0.158426	FALSE	1314	FALSE	0.20657	FALSE	683	FALSE
CIC	RECQL5	17	q25.1	0.0863055	0.0189463	0.15846	FALSE	1315	FALSE	0.206575	FALSE	684	FALSE
CIC	ATP1A1	1	p13.1	0.0862903	0.0189675	0.158564	FALSE	1316	FALSE	0.206673	FALSE	685	FALSE
CIC	CALN1	7	q11.22	0.0862557	0.0190156	0.158647	FALSE	1317	FALSE	0.206722	FALSE	686	FALSE
CIC	NPHS1	19	q13.12	0.0862525	0.0190201	0.158647	FALSE	1318	FALSE	NA	NA	NA	NA
CIC	HSD11B1L	19	p13.3	0.0862213	0.0190635	0.158787	FALSE	1319	FALSE	NA	NA	NA	NA
CIC	SIGLEC12	19	q13.41	0.0862131	0.0190749	0.158804	FALSE	1320	FALSE	NA	NA	NA	NA
CIC	C8orf34	8	q13.2	0.0861942	0.0191013	0.158886	FALSE	1321	FALSE	0.207069	FALSE	687	FALSE
CIC	CMC4	X	q28	0.0861789	0.0231822	0.176759	FALSE	1322	FALSE	0.225998	FALSE	688	FALSE
CIC	CCDC110	4	q35.1	0.0861585	0.0191512	0.159084	FALSE	1323	FALSE	0.207214	FALSE	689	FALSE
CIC	ZFYVE21	14	q32.33	0.0861332	0.0191868	0.159308	FALSE	1324	FALSE	0.207467	FALSE	690	FALSE
CIC	RNASE1	14	q11.2	0.0861066	0.0192241	0.159493	FALSE	1325	FALSE	0.207557	FALSE	691	FALSE
CIC	NUP98	11	p15.4	0.0860837	0.0192563	0.159523	FALSE	1326	FALSE	0.207557	FALSE	692	FALSE
CIC	OR2C1	16	p13.3	0.0860231	0.0193418	0.16005	FALSE	1327	FALSE	0.208129	FALSE	693	FALSE
CIC	RNPS1	16	p13.3	0.0859939	0.0204845	0.165001	FALSE	1328	FALSE	0.213355	FALSE	694	FALSE
CIC	ZFP41	8	q24.3	0.0859795	0.0194035	0.160453	FALSE	1329	FALSE	0.208589	FALSE	695	FALSE
CIC	RASAL1	12	q24.13	0.0859251	0.0194806	0.160828	FALSE	1330	FALSE	0.208876	FALSE	696	FALSE
CIC	TCEA2	20	q13.33	0.085913	0.0206038	0.165744	FALSE	1331	FALSE	0.214204	FALSE	697	FALSE
CIC	RHOF	12	q24.31	0.0859104	0.0195015	0.160828	FALSE	1332	FALSE	0.208876	FALSE	698	FALSE
CIC	FITM2	20	q13.12	0.0858874	0.0195343	0.161026	FALSE	1333	FALSE	0.209095	FALSE	699	FALSE
CIC	MLLT1	19	p13.3	0.0858839	0.020647	0.165748	FALSE	1334	FALSE	NA	NA	NA	NA
CIC	CNOT2	12	q15	0.0858618	0.0195708	0.161119	FALSE	1335	FALSE	0.209103	FALSE	700	FALSE
CIC	QARS	NA	NA	0.085861	0.0195719	0.161119	FALSE	1336	FALSE	0.209103	FALSE	701	FALSE
CIC	HIRA	22	q11.21	0.0858514	0.0206951	0.165968	FALSE	1337	FALSE	0.214497	FALSE	702	FALSE
CIC	RAB4B	19	q13.2	0.0858341	0.0196104	0.161363	FALSE	1338	FALSE	NA	NA	NA	NA
CIC	FCRL1	1	q23.1	0.0857478	0.0197341	0.162009	FALSE	1339	FALSE	0.21009	FALSE	703	FALSE
CIC	SPATA24	5	q31.2	0.0857362	0.0197507	0.162009	FALSE	1340	FALSE	0.21009	FALSE	704	FALSE
CIC	EGLN2	19	q13.2	0.0856954	0.020928	0.166848	FALSE	1341	FALSE	NA	NA	NA	NA
CIC	KRTAP22-1	21	q22.11	0.0856723	0.019843	0.162548	FALSE	1342	FALSE	0.210653	FALSE	705	FALSE
CIC	TMOD3	15	q21.2	0.0856651	0.0198533	0.16256	FALSE	1343	FALSE	0.210653	FALSE	706	FALSE
CIC	SEC16A	9	q34.3	0.0856479	0.0198781	0.16269	FALSE	1344	FALSE	0.210785	FALSE	707	FALSE
CIC	FUT5	19	p13.3	0.085573	0.0199868	0.16336	FALSE	1345	FALSE	NA	NA	NA	NA
CIC	ZC3H4	19	q13.32	0.0855365	0.0200399	0.163578	FALSE	1346	FALSE	NA	NA	NA	NA
CIC	ZNF530	19	q13.43	0.0855235	0.0200589	0.163585	FALSE	1347	FALSE	NA	NA	NA	NA
CIC	RBM24	6	p22.3	0.0855123	0.0200752	0.163646	FALSE	1348	FALSE	0.212081	FALSE	708	FALSE
CIC	MBOAT7	19	q13.42	0.0854867	0.0201127	0.163733	FALSE	1349	FALSE	NA	NA	NA	NA
CIC	ZNF768	16	p11.2	0.0854656	0.0201435	0.163765	FALSE	1350	FALSE	0.212143	FALSE	709	FALSE
CIC	OSBP	11	q12.1	0.0854329	0.0201915	0.164023	FALSE	1351	FALSE	0.212418	FALSE	710	FALSE
CIC	VRK3	19	q13.33	0.0854257	0.020202	0.164023	FALSE	1352	FALSE	NA	NA	NA	NA
CIC	SCGB1D4	11	q12.3	0.0854187	0.0202122	0.164033	FALSE	1353	FALSE	0.212472	FALSE	711	FALSE
CIC	CST11	20	p11.21	0.0853948	0.0202473	0.164245	FALSE	1354	FALSE	0.21271	FALSE	712	FALSE
CIC	ZNF200	16	p13.3	0.0853786	0.0202712	0.164314	FALSE	1355	FALSE	0.212715	FALSE	713	FALSE
CIC	IL1R1	2	q11.2	0.0853769	0.0202737	0.164314	FALSE	1356	FALSE	0.212715	FALSE	714	FALSE
CIC	CCDC60	12	q24.23	0.0853689	0.0202854	0.164336	FALSE	1357	FALSE	0.212715	FALSE	715	FALSE
CIC	PPP4R3B	2	p16.1	0.0853486	0.0203154	0.164506	FALSE	1358	FALSE	0.212778	FALSE	716	FALSE
CIC	PSMD2	3	q27.1	0.0853317	0.0203403	0.164528	FALSE	1359	FALSE	0.212778	FALSE	717	FALSE
CIC	MID2	X	q22.3	0.0853205	0.0245941	0.182113	FALSE	1360	FALSE	0.231365	FALSE	718	FALSE
CIC	SIGLEC10	19	q13.41	0.0853061	0.0203782	0.164651	FALSE	1361	FALSE	NA	NA	NA	NA
CIC	LRRC37A2	17	q21.31	0.0852757	0.0204231	0.16486	FALSE	1362	FALSE	0.213189	FALSE	719	FALSE
CIC	ZNF865	19	q13.42	0.0852587	0.0204483	0.164927	FALSE	1363	FALSE	NA	NA	NA	NA
CIC	NMBR	6	q24.1	0.0851343	0.0206335	0.165748	FALSE	1364	FALSE	0.214251	FALSE	720	FALSE
CIC	KIR2DL4	19	q13.42	0.0851285	0.0206423	0.165748	FALSE	1365	FALSE	NA	NA	NA	NA
CIC	SLC36A2	5	q33.1	0.0850697	0.0207303	0.166105	FALSE	1366	FALSE	0.214601	FALSE	721	FALSE
CIC	SEC23A	14	q21.1	0.0850578	0.0207482	0.166176	FALSE	1367	FALSE	0.214655	FALSE	722	FALSE
CIC	TEX101	19	q13.31	0.0850254	0.0207968	0.166477	FALSE	1368	FALSE	NA	NA	NA	NA
CIC	ADM2	22	q13.33	0.0850197	0.0208055	0.166477	FALSE	1369	FALSE	0.215071	FALSE	723	FALSE
CIC	GALP	19	q13.43	0.0850087	0.0208221	0.166477	FALSE	1370	FALSE	NA	NA	NA	NA
CIC	SALL2	14	q11.2	0.084967	0.0208849	0.166771	FALSE	1371	FALSE	0.215521	FALSE	724	FALSE
CIC	IFNL1	19	q13.2	0.0849613	0.0208935	0.166771	FALSE	1372	FALSE	NA	NA	NA	NA
CIC	CFL2	14	q13.1	0.0849601	0.0208953	0.166771	FALSE	1373	FALSE	0.215521	FALSE	725	FALSE
CIC	CST9L	20	p11.21	0.084944	0.0209196	0.166848	FALSE	1374	FALSE	0.21564	FALSE	726	FALSE
CIC	NDUFAF6	8	q22.1	0.0849357	0.0209322	0.166848	FALSE	1375	FALSE	0.21564	FALSE	727	FALSE
CIC	ALDOB	9	q31.1	0.0848819	0.0210138	0.167135	FALSE	1376	FALSE	0.215827	FALSE	728	FALSE
CIC	ATXN3L	X	p22.2	0.0848767	0.0253527	0.184734	FALSE	1377	FALSE	0.233448	FALSE	729	FALSE
CIC	NUAK1	12	q23.3	0.0848608	0.0210458	0.167317	FALSE	1378	FALSE	0.216025	FALSE	730	FALSE
CIC	GALNT12	9	q22.33	0.084852	0.0210593	0.167351	FALSE	1379	FALSE	0.216032	FALSE	731	FALSE
CIC	EIF3D	22	q12.3	0.0847743	0.0211778	0.167856	FALSE	1380	FALSE	0.216464	FALSE	732	FALSE
CIC	SETD9	5	q11.2	0.0846967	0.0224733	0.173988	FALSE	1381	FALSE	0.223002	FALSE	733	FALSE
CIC	OR10H3	19	p13.12	0.0846667	0.0213429	0.1688	FALSE	1382	FALSE	NA	NA	NA	NA
CIC	VAPB	20	q13.32	0.0846249	0.0214073	0.169237	FALSE	1383	FALSE	0.218154	FALSE	734	FALSE
CIC	ABHD17A	19	p13.3	0.0845959	0.0214521	0.169518	FALSE	1384	FALSE	NA	NA	NA	NA
CIC	CHD7	8	q12.2	0.084574	0.0226698	0.174816	FALSE	1385	FALSE	0.224093	FALSE	735	FALSE
CIC	DEFB127	20	p13	0.0845672	0.0214965	0.169722	FALSE	1386	FALSE	0.218755	FALSE	736	FALSE
CIC	NDUFV2	18	p11.22	0.0845552	0.021515	0.169744	FALSE	1387	FALSE	0.218755	FALSE	737	FALSE
CIC	SLF1	5	q15	0.0845535	0.0215177	0.169744	FALSE	1388	FALSE	0.218755	FALSE	738	FALSE
CIC	DAZAP1	19	p13.3	0.0845397	0.0215391	0.169766	FALSE	1389	FALSE	NA	NA	NA	NA
CIC	B4GALT6	18	q12.1	0.084522	0.0215666	0.169837	FALSE	1390	FALSE	0.218859	FALSE	739	FALSE
CIC	ZNF720	NA	NA	0.0845086	0.0215874	0.169908	FALSE	1391	FALSE	0.218878	FALSE	740	FALSE
CIC	CARS	NA	NA	0.0844571	0.0216675	0.170266	FALSE	1392	FALSE	0.219229	FALSE	741	FALSE
CIC	AFAP1L2	10	q25.3	0.0844488	0.0216805	0.170295	FALSE	1393	FALSE	0.219229	FALSE	742	FALSE
CIC	CNGA2	X	q28	0.0844418	0.0261155	0.187829	FALSE	1394	FALSE	0.237214	FALSE	743	FALSE
CIC	ADCYAP1	18	p11.32	0.0844159	0.0217318	0.170472	FALSE	1395	FALSE	0.219312	FALSE	744	FALSE
CIC	GSPT2	X	p11.22	0.0843969	0.0261954	0.188108	FALSE	1396	FALSE	0.237477	FALSE	745	FALSE
CIC	DCAF4L1	4	p13	0.0843598	0.0218198	0.170877	FALSE	1397	FALSE	0.219724	FALSE	746	FALSE
CIC	METTL25	12	q21.31	0.0843027	0.0219094	0.171211	FALSE	1398	FALSE	0.219935	FALSE	747	FALSE
CIC	SCO2	22	q13.33	0.0842305	0.0220235	0.171675	FALSE	1399	FALSE	0.220351	FALSE	748	FALSE
CIC	OR13D1	9	q31.1	0.0842207	0.022039	0.171713	FALSE	1400	FALSE	0.220364	FALSE	749	FALSE
CIC	MUC21	6	p21.33	0.0842065	0.0220614	0.171815	FALSE	1401	FALSE	0.220458	FALSE	750	FALSE
CIC	ZNF329	19	q13.43	0.084191	0.022086	0.171933	FALSE	1402	FALSE	NA	NA	NA	NA
CIC	CKAP5	11	p11.2	0.0841608	0.0221339	0.172196	FALSE	1403	FALSE	0.22097	FALSE	751	FALSE
CIC	WASF3	13	q12.13	0.0841579	0.0221386	0.172196	FALSE	1404	FALSE	0.22097	FALSE	752	FALSE
CIC	TECPR1	7	q21.3	0.0841417	0.0221643	0.172323	FALSE	1405	FALSE	0.221097	FALSE	753	FALSE
CIC	NAE1	16	q22.1	0.0841188	0.0222007	0.172533	FALSE	1406	FALSE	0.22133	FALSE	754	FALSE
CIC	ENTR1	9	q34.3	0.0840786	0.0222649	0.172739	FALSE	1407	FALSE	0.22145	FALSE	755	FALSE
CIC	FBXW7	4	q31.3	0.0840267	0.0223479	0.173236	FALSE	1408	FALSE	0.222	FALSE	756	FALSE
CIC	SNRPF	12	q23.1	0.0840182	0.0235788	0.178036	FALSE	1409	FALSE	0.227336	FALSE	757	FALSE
CIC	CYP4F3	19	p13.12	0.0839684	0.0224414	0.173814	FALSE	1410	FALSE	NA	NA	NA	NA
CIC	FSTL3	19	p13.3	0.0839386	0.0224893	0.174038	FALSE	1411	FALSE	NA	NA	NA	NA
CIC	MN1	22	q12.1	0.0839163	0.0225253	0.17417	FALSE	1412	FALSE	0.223256	FALSE	758	FALSE
CIC	SPATA32	17	q21.31	0.0838949	0.0225598	0.17429	FALSE	1413	FALSE	0.223338	FALSE	759	FALSE
CIC	C19orf24	NA	NA	0.0838868	0.022573	0.174318	FALSE	1414	FALSE	NA	NA	NA	NA
CIC	GYS1	19	q13.33	0.0838507	0.0226314	0.174695	FALSE	1415	FALSE	NA	NA	NA	NA
CIC	ZNF846	19	p13.2	0.0838143	0.0226904	0.174857	FALSE	1416	FALSE	NA	NA	NA	NA
CIC	DYSF	2	p13.2	0.0838068	0.0227026	0.174877	FALSE	1417	FALSE	0.22423	FALSE	760	FALSE
CIC	STX10	19	p13.13	0.0837698	0.0227627	0.175154	FALSE	1418	FALSE	NA	NA	NA	NA
CIC	C12orf76	12	q24.11	0.0837627	0.0227743	0.175154	FALSE	1419	FALSE	0.22457	FALSE	761	FALSE
CIC	CH25H	10	q23.31	0.0837612	0.0227768	0.175154	FALSE	1420	FALSE	0.22457	FALSE	762	FALSE
CIC	GSDMB	17	q21.1	0.0836885	0.0228953	0.175697	FALSE	1421	FALSE	0.225087	FALSE	763	FALSE
CIC	ARL6IP1	16	p12.3	0.0836534	0.0229528	0.175844	FALSE	1422	FALSE	0.225131	FALSE	764	FALSE
CIC	RGL3	19	p13.2	0.0835819	0.0230703	0.176597	FALSE	1423	FALSE	NA	NA	NA	NA
CIC	SLC49A3	4	p16.3	0.0835752	0.0230814	0.176607	FALSE	1424	FALSE	0.225998	FALSE	765	FALSE
CIC	UBE4A	11	q23.3	0.0835564	0.0231123	0.176728	FALSE	1425	FALSE	0.225998	FALSE	766	FALSE
CIC	SLC25A44	1	q22	0.0835481	0.023126	0.176728	FALSE	1426	FALSE	0.225998	FALSE	767	FALSE
CIC	IRF9	14	q12	0.0835419	0.0231362	0.176732	FALSE	1427	FALSE	0.225998	FALSE	768	FALSE
CIC	ABCD1	X	q28	0.0835287	0.0277822	0.194841	FALSE	1428	FALSE	0.244264	FALSE	769	FALSE
CIC	RASGRF2	5	q14.1	0.0835114	0.0231867	0.176759	FALSE	1429	FALSE	0.225998	FALSE	770	FALSE
CIC	ARL15	5	q11.2	0.0835106	0.023188	0.176759	FALSE	1430	FALSE	0.225998	FALSE	771	FALSE
CIC	PXT1	6	p21.31	0.083477	0.0232436	0.176962	FALSE	1431	FALSE	0.226142	FALSE	772	FALSE
CIC	OPN1MW	X	q28	0.0834326	0.0279628	0.195441	FALSE	1432	FALSE	0.244754	FALSE	773	FALSE
CIC	HOXC5	12	q13.13	0.0834288	0.0233237	0.177201	FALSE	1433	FALSE	0.226249	FALSE	774	FALSE
CIC	FAM210B	20	q13.2	0.0834232	0.023333	0.177201	FALSE	1434	FALSE	0.226249	FALSE	775	FALSE
CIC	SCAMP4	19	p13.3	0.0834103	0.0233545	0.177291	FALSE	1435	FALSE	NA	NA	NA	NA
CIC	ZNF324B	19	q13.43	0.0833559	0.0234452	0.177759	FALSE	1436	FALSE	NA	NA	NA	NA
CIC	TMEM79	1	q22	0.0833497	0.0234554	0.177763	FALSE	1437	FALSE	0.227048	FALSE	776	FALSE
CIC	SNAPC4	9	q34.3	0.0833113	0.0247805	0.182833	FALSE	1438	FALSE	0.232062	FALSE	777	FALSE
CIC	CPNE3	8	q21.3	0.0833027	0.0235341	0.178036	FALSE	1439	FALSE	0.227336	FALSE	778	FALSE
CIC	PCDH8	13	q14.3	0.0833007	0.0235374	0.178036	FALSE	1440	FALSE	0.227336	FALSE	779	FALSE
CIC	KRTAP10-7	21	q22.3	0.0832928	0.0235508	0.178036	FALSE	1441	FALSE	0.227336	FALSE	780	FALSE
CIC	STAP2	19	p13.3	0.0832881	0.0235585	0.178036	FALSE	1442	FALSE	NA	NA	NA	NA
CIC	ZNF253	19	p13.11	0.0832876	0.0235594	0.178036	FALSE	1443	FALSE	NA	NA	NA	NA
CIC	QRICH2	17	q25.1	0.0832843	0.0235649	0.178036	FALSE	1444	FALSE	0.227336	FALSE	781	FALSE
CIC	GPSM1	9	q34.3	0.0832781	0.0235753	0.178036	FALSE	1445	FALSE	0.227336	FALSE	782	FALSE
CIC	ZNF613	19	q13.41	0.0832518	0.0236195	0.17827	FALSE	1446	FALSE	NA	NA	NA	NA
CIC	GMPS	3	q25.31	0.0831993	0.0237079	0.178716	FALSE	1447	FALSE	0.228144	FALSE	783	FALSE
CIC	SOGA1	20	q11.23	0.0831896	0.0237242	0.178734	FALSE	1448	FALSE	0.228144	FALSE	784	FALSE
CIC	CDKN2D	19	p13.2	0.0830388	0.0239799	0.179749	FALSE	1449	FALSE	NA	NA	NA	NA
CIC	C3orf38	3	p11.1	0.0830041	0.024039	0.179991	FALSE	1450	FALSE	0.229209	FALSE	785	FALSE
CIC	HNF4G	8	q21.13	0.082993	0.024058	0.179991	FALSE	1451	FALSE	0.229209	FALSE	786	FALSE
CIC	GZMB	14	q12	0.0829905	0.0240622	0.179991	FALSE	1452	FALSE	0.229209	FALSE	787	FALSE
CIC	EIF4G2	11	p15.4	0.0829782	0.0240833	0.179991	FALSE	1453	FALSE	0.229209	FALSE	788	FALSE
CIC	OR4K2	14	q11.2	0.0829177	0.0241868	0.180411	FALSE	1454	FALSE	0.229666	FALSE	789	FALSE
CIC	KLF2	19	p13.11	0.0829167	0.0241887	0.180411	FALSE	1455	FALSE	NA	NA	NA	NA
CIC	AASDH	4	q12	0.0829107	0.0241989	0.180414	FALSE	1456	FALSE	0.229666	FALSE	790	FALSE
CIC	DAPK3	19	p13.3	0.0828751	0.0255481	0.185568	FALSE	1457	FALSE	NA	NA	NA	NA
CIC	SHANK1	19	q13.33	0.0828478	0.024307	0.180665	FALSE	1458	FALSE	NA	NA	NA	NA
CIC	PCDHGC5	5	q31.3	0.0828456	0.0243108	0.180665	FALSE	1459	FALSE	0.229812	FALSE	791	FALSE
CIC	RIPK4	21	q22.3	0.0828389	0.0243224	0.180673	FALSE	1460	FALSE	0.229812	FALSE	792	FALSE
CIC	ARHGEF11	1	q23.1	0.0827931	0.0244015	0.181188	FALSE	1461	FALSE	0.230431	FALSE	793	FALSE
CIC	AIRE	21	q22.3	0.0827467	0.0257779	0.186351	FALSE	1462	FALSE	0.23545	FALSE	794	FALSE
CIC	ANTXR1	2	p13.3	0.082707	0.0245506	0.181927	FALSE	1463	FALSE	0.231198	FALSE	795	FALSE
CIC	C9orf66	NA	NA	0.0826723	0.0246111	0.182154	FALSE	1464	FALSE	0.231382	FALSE	796	FALSE
CIC	CBWD3	9	q21.11	0.0826398	0.0246677	0.182402	FALSE	1465	FALSE	0.231557	FALSE	797	FALSE
CIC	OR52I1	11	p15.4	0.0826379	0.0246709	0.182402	FALSE	1466	FALSE	0.231557	FALSE	798	FALSE
CIC	ENG	9	q34.11	0.0826281	0.0246881	0.182427	FALSE	1467	FALSE	0.231557	FALSE	799	FALSE
CIC	CERS5	12	q13.12	0.0825957	0.0247448	0.182701	FALSE	1468	FALSE	0.23187	FALSE	800	FALSE
CIC	PEG3	19	q13.43	0.0825714	0.0247872	0.182833	FALSE	1469	FALSE	NA	NA	NA	NA
CIC	TSPAN3	15	q24.3	0.0825684	0.0247926	0.182833	FALSE	1470	FALSE	0.232062	FALSE	801	FALSE
CIC	DGKE	17	q22	0.0825287	0.0248623	0.18314	FALSE	1471	FALSE	0.232348	FALSE	802	FALSE
CIC	C16orf72	16	p13.2	0.0825112	0.0248929	0.183278	FALSE	1472	FALSE	0.232489	FALSE	803	FALSE
CIC	INCA1	17	p13.2	0.0824747	0.0249574	0.183618	FALSE	1473	FALSE	0.232818	FALSE	804	FALSE
CIC	BMP7	20	q13.31	0.0824277	0.0250402	0.183929	FALSE	1474	FALSE	0.233027	FALSE	805	FALSE
CIC	PRPF4	9	q32	0.0823917	0.0251039	0.184166	FALSE	1475	FALSE	0.233027	FALSE	806	FALSE
CIC	RBM27	5	q32	0.0823497	0.0251785	0.184241	FALSE	1476	FALSE	0.233027	FALSE	807	FALSE
CIC	CABIN1	22	q11.23	0.0823343	0.0265281	0.189754	FALSE	1477	FALSE	0.239316	FALSE	808	FALSE
CIC	C10orf71	10	q11.23	0.0823328	0.0252085	0.184241	FALSE	1478	FALSE	0.233027	FALSE	809	FALSE
CIC	PCDHGB3	5	q31.3	0.0823246	0.025223	0.184241	FALSE	1479	FALSE	0.233027	FALSE	810	FALSE
CIC	DHRS4	14	q11.2	0.082257	0.0253436	0.184734	FALSE	1480	FALSE	0.233448	FALSE	811	FALSE
CIC	CIB3	19	p13.11	0.0822228	0.0254047	0.184966	FALSE	1481	FALSE	NA	NA	NA	NA
CIC	GRK6	5	q35.3	0.0822043	0.0254378	0.185133	FALSE	1482	FALSE	0.233978	FALSE	812	FALSE
CIC	IRGQ	19	q13.31	0.082178	0.0254851	0.185404	FALSE	1483	FALSE	NA	NA	NA	NA
CIC	RBL1	20	q11.23	0.0821137	0.026937	0.191551	FALSE	1484	FALSE	0.241005	FALSE	813	FALSE
CIC	LIMK2	22	q12.2	0.0821109	0.0256056	0.185839	FALSE	1485	FALSE	0.234886	FALSE	814	FALSE
CIC	HUWE1	X	p11.22	0.0821092	0.0319083	0.211794	FALSE	1486	FALSE	0.262272	FALSE	815	FALSE
CIC	MTX2	2	q31.1	0.0820962	0.0256323	0.185958	FALSE	1487	FALSE	0.235004	FALSE	816	FALSE
CIC	LELP1	1	q21.3	0.082078	0.025665	0.186113	FALSE	1488	FALSE	0.235132	FALSE	817	FALSE
CIC	ABCB8	7	q36.1	0.0820486	0.0257182	0.186244	FALSE	1489	FALSE	0.235177	FALSE	818	FALSE
CIC	ORAI2	7	q22.1	0.0820463	0.0257224	0.186244	FALSE	1490	FALSE	0.235177	FALSE	819	FALSE
CIC	CYP2A6	19	q13.2	0.0820271	0.0257571	0.186346	FALSE	1491	FALSE	NA	NA	NA	NA
CIC	LHB	19	q13.33	0.0820216	0.025767	0.186346	FALSE	1492	FALSE	NA	NA	NA	NA
CIC	TAF1	X	q13.1	0.0820151	0.0321059	0.21227	FALSE	1493	FALSE	0.26248	FALSE	820	FALSE
CIC	RAB11FIP3	16	p13.3	0.0819543	0.0258894	0.186936	FALSE	1494	FALSE	0.236214	FALSE	821	FALSE
CIC	NFATC2	20	q13.2	0.0819135	0.0259636	0.187266	FALSE	1495	FALSE	0.236638	FALSE	822	FALSE
CIC	CEACAM1	19	q13.2	0.0819124	0.0259657	0.187266	FALSE	1496	FALSE	NA	NA	NA	NA
CIC	GOLGA7	8	p11.21	0.081869	0.026045	0.187616	FALSE	1497	FALSE	0.236998	FALSE	823	FALSE
CIC	B3GNT8	19	q13.2	0.0818528	0.0260746	0.187755	FALSE	1498	FALSE	NA	NA	NA	NA
CIC	EEF1AKMT4	3	q27.1	0.0818333	0.0261103	0.187829	FALSE	1499	FALSE	0.237214	FALSE	824	FALSE
CIC	BCDIN3D	12	q13.12	0.0818177	0.0261389	0.187868	FALSE	1500	FALSE	0.237214	FALSE	825	FALSE
CIC	NOMO1	16	p13.11	0.0817548	0.0262544	0.188384	FALSE	1501	FALSE	0.237758	FALSE	826	FALSE
CIC	ECEL1	2	q37.1	0.0817185	0.0263213	0.188683	FALSE	1502	FALSE	0.238152	FALSE	827	FALSE
CIC	KCNV1	8	q23.2	0.0817161	0.0263259	0.188683	FALSE	1503	FALSE	0.238152	FALSE	828	FALSE
CIC	UBA1	X	p11.3	0.0816669	0.0314651	0.210069	FALSE	1504	FALSE	0.260486	FALSE	829	FALSE
CIC	KRT33B	17	q21.2	0.0816447	0.0264579	0.189399	FALSE	1505	FALSE	0.238964	FALSE	830	FALSE
CIC	ZNF410	14	q24.3	0.081633	0.0264796	0.189481	FALSE	1506	FALSE	0.239034	FALSE	831	FALSE
CIC	CDC5L	6	p21.1	0.0816188	0.0278745	0.195138	FALSE	1507	FALSE	0.244444	FALSE	832	FALSE
CIC	COX6A2	16	p11.2	0.0815212	0.0266878	0.190524	FALSE	1508	FALSE	0.240147	FALSE	833	FALSE
CIC	ZFP92	X	q28	0.0815207	0.0317715	0.211268	FALSE	1509	FALSE	0.26178	FALSE	834	FALSE
CIC	LHCGR	2	p16.3	0.0814727	0.0267785	0.190982	FALSE	1510	FALSE	0.240522	FALSE	835	FALSE
CIC	POLR2E	19	p13.3	0.0814585	0.0281839	0.196388	FALSE	1511	FALSE	NA	NA	NA	NA
CIC	EVX2	2	q31.1	0.081456	0.0268097	0.190982	FALSE	1512	FALSE	0.240522	FALSE	836	FALSE
CIC	CDC27	17	q21.32	0.0814541	0.0268133	0.190982	FALSE	1513	FALSE	0.240522	FALSE	837	FALSE
CIC	FAM180A	7	q33	0.0814121	0.0268921	0.191461	FALSE	1514	FALSE	0.241005	FALSE	838	FALSE
CIC	OR4N2	14	q11.2	0.0813803	0.026952	0.191551	FALSE	1515	FALSE	0.241005	FALSE	839	FALSE
CIC	KRTAP9-9	17	q21.2	0.0813787	0.0269551	0.191551	FALSE	1516	FALSE	0.241005	FALSE	840	FALSE
CIC	TRUB1	10	q25.3	0.0813728	0.0269661	0.191551	FALSE	1517	FALSE	0.241005	FALSE	841	FALSE
CIC	CNIH4	1	q42.11	0.0813721	0.0269674	0.191551	FALSE	1518	FALSE	0.241005	FALSE	842	FALSE
CIC	C1QTNF7	4	p15.32	0.0813559	0.0269979	0.191694	FALSE	1519	FALSE	0.241151	FALSE	843	FALSE
CIC	KLHL10	17	q21.2	0.0813133	0.0270784	0.19219	FALSE	1520	FALSE	0.241743	FALSE	844	FALSE
CIC	PPP1R10	6	p21.33	0.0812067	0.0272808	0.192953	FALSE	1521	FALSE	0.242108	FALSE	845	FALSE
CIC	CEP72	5	p15.33	0.0812061	0.0272819	0.192953	FALSE	1522	FALSE	0.242108	FALSE	846	FALSE
CIC	OR13C5	9	q31.1	0.0811981	0.0272971	0.192953	FALSE	1523	FALSE	0.242108	FALSE	847	FALSE
CIC	WTAP	6	q25.3	0.0811977	0.0272979	0.192953	FALSE	1524	FALSE	0.242108	FALSE	848	FALSE
CIC	GIMAP7	7	q36.1	0.0811761	0.027339	0.192953	FALSE	1525	FALSE	0.242108	FALSE	849	FALSE
CIC	KCTD10	12	q24.11	0.0811626	0.0273647	0.192953	FALSE	1526	FALSE	0.242108	FALSE	850	FALSE
CIC	TNXB	6	p21.32	0.0811569	0.0273756	0.192956	FALSE	1527	FALSE	0.242108	FALSE	851	FALSE
CIC	LTB4R2	14	q12	0.0811446	0.0273991	0.193047	FALSE	1528	FALSE	0.242189	FALSE	852	FALSE
CIC	CHAF1B	21	q22.12	0.0811282	0.0288312	0.19888	FALSE	1529	FALSE	0.248166	FALSE	853	FALSE
CIC	ARSD	X	p22.33	0.08109	0.0326881	0.214169	FALSE	1530	FALSE	0.264166	FALSE	854	FALSE
CIC	NR2F6	19	p13.11	0.0810628	0.0275558	0.194077	FALSE	1531	FALSE	NA	NA	NA	NA
CIC	NCF4	22	q12.3	0.0810386	0.0276022	0.194328	FALSE	1532	FALSE	0.243798	FALSE	855	FALSE
CIC	C1QTNF8	16	p13.3	0.0809805	0.0277142	0.194841	FALSE	1533	FALSE	0.244264	FALSE	856	FALSE
CIC	TLR10	4	p14	0.0809702	0.027734	0.194841	FALSE	1534	FALSE	0.244264	FALSE	857	FALSE
CIC	TESK1	9	p13.3	0.080967	0.0277403	0.194841	FALSE	1535	FALSE	0.244264	FALSE	858	FALSE
CIC	TGFB3	14	q24.3	0.08095	0.0277731	0.194841	FALSE	1536	FALSE	0.244264	FALSE	859	FALSE
CIC	ZNF763	19	p13.2	0.0809478	0.0277773	0.194841	FALSE	1537	FALSE	NA	NA	NA	NA
CIC	TNFRSF6B	20	q13.33	0.0809452	0.0277823	0.194841	FALSE	1538	FALSE	0.244264	FALSE	860	FALSE
CIC	USP5	12	p13.31	0.0809403	0.0277919	0.194841	FALSE	1539	FALSE	0.244264	FALSE	861	FALSE
CIC	CCL21	9	p13.3	0.080927	0.0278176	0.194946	FALSE	1540	FALSE	0.244363	FALSE	862	FALSE
CIC	MRPL58	17	q25.1	0.080893	0.0278834	0.195138	FALSE	1541	FALSE	0.244444	FALSE	863	FALSE
CIC	DGKG	3	q27.3	0.0808909	0.0278874	0.195138	FALSE	1542	FALSE	0.244444	FALSE	864	FALSE
CIC	BEST3	12	q15	0.0808376	0.0279911	0.195505	FALSE	1543	FALSE	0.244769	FALSE	865	FALSE
CIC	XPNPEP3	22	q13.2	0.0808365	0.0279933	0.195505	FALSE	1544	FALSE	0.244769	FALSE	866	FALSE
CIC	DIO2	14	q31.1	0.0807972	0.0280698	0.19589	FALSE	1545	FALSE	0.245185	FALSE	867	FALSE
CIC	PTPRT	20	q13.11	0.0807666	0.0281295	0.196209	FALSE	1546	FALSE	0.245519	FALSE	868	FALSE
CIC	NDUFB6	9	p21.1	0.0807391	0.0281833	0.196388	FALSE	1547	FALSE	0.245798	FALSE	869	FALSE
CIC	PSMA7	20	q13.33	0.080705	0.0282502	0.1967	FALSE	1548	FALSE	0.246128	FALSE	870	FALSE
CIC	ELSPBP1	19	q13.33	0.0806821	0.028295	0.196937	FALSE	1549	FALSE	NA	NA	NA	NA
CIC	KRT28	17	q21.2	0.0806099	0.0284372	0.197702	FALSE	1550	FALSE	0.247376	FALSE	871	FALSE
CIC	SERTM1	13	q13.3	0.0805727	0.0285107	0.197973	FALSE	1551	FALSE	0.247456	FALSE	872	FALSE
CIC	NPR1	1	q21.3	0.0805665	0.0285229	0.197973	FALSE	1552	FALSE	0.247456	FALSE	873	FALSE
CIC	PIP4K2A	10	p12.2	0.0805528	0.0285501	0.197973	FALSE	1553	FALSE	0.247456	FALSE	874	FALSE
CIC	CCDC66	3	p14.3	0.0805464	0.0285627	0.197973	FALSE	1554	FALSE	0.247456	FALSE	875	FALSE
CIC	OR51B4	11	p15.4	0.0805211	0.0286129	0.19823	FALSE	1555	FALSE	0.247665	FALSE	876	FALSE
CIC	SREK1	5	q12.3	0.0805146	0.0286257	0.19823	FALSE	1556	FALSE	0.247665	FALSE	877	FALSE
CIC	CASP6	4	q25	0.0805114	0.0286322	0.19823	FALSE	1557	FALSE	0.247665	FALSE	878	FALSE
CIC	C8orf88	8	q21.3	0.0804994	0.028656	0.19832	FALSE	1558	FALSE	0.247665	FALSE	879	FALSE
CIC	GPX1	3	p21.31	0.0804862	0.0286821	0.198367	FALSE	1559	FALSE	0.247665	FALSE	880	FALSE
CIC	MRPL14	6	p21.1	0.080485	0.0286844	0.198367	FALSE	1560	FALSE	0.247665	FALSE	881	FALSE
CIC	ACKR3	2	q37.3	0.0804714	0.0287116	0.1984	FALSE	1561	FALSE	0.247665	FALSE	882	FALSE
CIC	ATP5F1C	10	p14	0.0804484	0.0287573	0.198497	FALSE	1562	FALSE	0.247753	FALSE	883	FALSE
CIC	DNAJC15	13	q14.11	0.0803416	0.0289708	0.19967	FALSE	1563	FALSE	0.249088	FALSE	884	FALSE
CIC	AK5	1	p31.1	0.0802824	0.0290896	0.200187	FALSE	1564	FALSE	0.249604	FALSE	885	FALSE
CIC	SMIM17	19	q13.43	0.0802221	0.0292111	0.200661	FALSE	1565	FALSE	NA	NA	NA	NA
CIC	CERS1	19	p13.11	0.080204	0.0292476	0.200747	FALSE	1566	FALSE	NA	NA	NA	NA
CIC	FCER1A	1	q23.2	0.0801883	0.0292795	0.200816	FALSE	1567	FALSE	0.250348	FALSE	886	FALSE
CIC	CRYBA1	17	q11.2	0.0801213	0.0294151	0.201422	FALSE	1568	FALSE	0.250943	FALSE	887	FALSE
CIC	CNIH3	1	q42.12	0.0801176	0.0294228	0.201422	FALSE	1569	FALSE	0.250943	FALSE	888	FALSE
CIC	SYP	X	p11.23	0.0800716	0.0349461	0.221531	FALSE	1570	FALSE	0.271027	FALSE	889	FALSE
CIC	SERPINA11	14	q32.13	0.0800367	0.0295874	0.202397	FALSE	1571	FALSE	0.252093	FALSE	890	FALSE
CIC	CCDC86	11	q12.2	0.0799952	0.0296722	0.202751	FALSE	1572	FALSE	0.252437	FALSE	891	FALSE
CIC	HOXC6	12	q13.13	0.0799384	0.0297886	0.203334	FALSE	1573	FALSE	0.253066	FALSE	892	FALSE
CIC	PLIN5	19	p13.3	0.0799297	0.0298065	0.203366	FALSE	1574	FALSE	NA	NA	NA	NA
CIC	LGALS3BP	17	q25.3	0.0799219	0.0298226	0.203399	FALSE	1575	FALSE	0.253209	FALSE	893	FALSE
CIC	RPS5	19	q13.43	0.0799125	0.0298419	0.203402	FALSE	1576	FALSE	NA	NA	NA	NA
CIC	GLOD4	17	p13.3	0.0799124	0.0313246	0.209512	FALSE	1577	FALSE	0.259988	FALSE	894	FALSE
CIC	EPS8L1	19	q13.42	0.0799109	0.0298452	0.203402	FALSE	1578	FALSE	NA	NA	NA	NA
CIC	THEGL	4	q12	0.0798606	0.0299487	0.204032	FALSE	1579	FALSE	0.254153	FALSE	895	FALSE
CIC	AEN	15	q26.1	0.079851	0.0299686	0.204092	FALSE	1580	FALSE	0.254195	FALSE	896	FALSE
CIC	DNASE1L1	X	q28	0.0798453	0.0354657	0.223204	FALSE	1581	FALSE	0.272658	FALSE	897	FALSE
CIC	UBE2F	2	q37.3	0.0798288	0.0300143	0.204175	FALSE	1582	FALSE	0.254198	FALSE	898	FALSE
CIC	CCDC102A	16	q21	0.0797731	0.0301296	0.204656	FALSE	1583	FALSE	0.254665	FALSE	899	FALSE
CIC	MTERF3	8	q22.1	0.0796972	0.0302872	0.205574	FALSE	1584	FALSE	0.255749	FALSE	900	FALSE
CIC	SERPINE2	2	q36.1	0.0796827	0.0303176	0.205704	FALSE	1585	FALSE	0.255878	FALSE	901	FALSE
CIC	ANP32B	9	q22.33	0.0796554	0.0318748	0.211648	FALSE	1586	FALSE	0.262123	FALSE	902	FALSE
CIC	CIB1	15	q26.1	0.0796381	0.0304106	0.206118	FALSE	1587	FALSE	0.256296	FALSE	903	FALSE
CIC	NOSIP	19	q13.33	0.0795785	0.0305354	0.206653	FALSE	1588	FALSE	NA	NA	NA	NA
CIC	EPOP	17	q12	0.079578	0.0305364	0.206653	FALSE	1589	FALSE	0.256959	FALSE	904	FALSE
CIC	OR51A4	11	p15.4	0.0795065	0.0306867	0.207319	FALSE	1590	FALSE	0.257534	FALSE	905	FALSE
CIC	QRFP	9	q34.12	0.0794973	0.0307062	0.207343	FALSE	1591	FALSE	0.257534	FALSE	906	FALSE
CIC	CDH4	20	q13.33	0.0794863	0.0307292	0.207349	FALSE	1592	FALSE	0.257534	FALSE	907	FALSE
CIC	ICE1	5	p15.32	0.0794847	0.0307327	0.207349	FALSE	1593	FALSE	0.257534	FALSE	908	FALSE
CIC	COL20A1	20	q13.33	0.0794807	0.030741	0.207349	FALSE	1594	FALSE	0.257534	FALSE	909	FALSE
CIC	LSM14A	19	q13.11	0.0794724	0.0307585	0.207391	FALSE	1595	FALSE	NA	NA	NA	NA
CIC	SUPT6H	17	q11.2	0.0794717	0.032273	0.212675	FALSE	1596	FALSE	0.262854	FALSE	910	FALSE
CIC	BHLHE23	20	q13.33	0.0794639	0.0307764	0.207413	FALSE	1597	FALSE	0.257643	FALSE	911	FALSE
CIC	ELAC2	17	p12	0.0794258	0.030857	0.207814	FALSE	1598	FALSE	0.258077	FALSE	912	FALSE
CIC	PLCD4	2	q35	0.07941	0.0308905	0.207874	FALSE	1599	FALSE	0.25815	FALSE	913	FALSE
CIC	FCGRT	19	q13.33	0.0794064	0.0308982	0.207874	FALSE	1600	FALSE	NA	NA	NA	NA
CIC	TCF21	6	q23.2	0.07939	0.0309329	0.207955	FALSE	1601	FALSE	0.25825	FALSE	914	FALSE
CIC	FAM53C	5	q31.2	0.0793733	0.0309682	0.208116	FALSE	1602	FALSE	0.258418	FALSE	915	FALSE
CIC	HHAT	1	q32.2	0.079326	0.0310688	0.208589	FALSE	1603	FALSE	0.258909	FALSE	916	FALSE
CIC	PTGDR2	11	q12.2	0.0793045	0.0311147	0.208744	FALSE	1604	FALSE	0.259037	FALSE	917	FALSE
CIC	HOXC4	12	q13.13	0.0792925	0.0311403	0.208813	FALSE	1605	FALSE	0.259091	FALSE	918	FALSE
CIC	SNRNP70	19	q13.33	0.0792745	0.0311785	0.208993	FALSE	1606	FALSE	NA	NA	NA	NA
CIC	C19orf71	NA	NA	0.0792632	0.0312027	0.209079	FALSE	1607	FALSE	NA	NA	NA	NA
CIC	MAF1	8	q24.3	0.0792325	0.0312684	0.209213	FALSE	1608	FALSE	0.259648	FALSE	919	FALSE
CIC	DDX27	20	q13.13	0.0791829	0.0313746	0.209665	FALSE	1609	FALSE	0.26006	FALSE	920	FALSE
CIC	URI1	19	q12	0.0791275	0.0330306	0.215421	FALSE	1610	FALSE	NA	NA	NA	NA
CIC	CAND2	3	p25.2	0.0790906	0.0315733	0.210489	FALSE	1611	FALSE	0.261033	FALSE	921	FALSE
CIC	LILRA5	19	q13.42	0.0790903	0.0315739	0.210489	FALSE	1612	FALSE	NA	NA	NA	NA
CIC	USP36	17	q25.3	0.0790691	0.0316198	0.210641	FALSE	1613	FALSE	0.261163	FALSE	922	FALSE
CIC	KIF17	1	p36.12	0.0790481	0.0316651	0.210867	FALSE	1614	FALSE	0.26141	FALSE	923	FALSE
CIC	PPP2R5C	14	q32.31	0.0790409	0.0316807	0.210894	FALSE	1615	FALSE	0.261412	FALSE	924	FALSE
CIC	RPL31	2	q11.2	0.0790107	0.0317462	0.211177	FALSE	1616	FALSE	0.261698	FALSE	925	FALSE
CIC	RPS6KA5	14	q32.11	0.0789307	0.0334706	0.217056	FALSE	1617	FALSE	0.266959	FALSE	926	FALSE
CIC	ZNF785	16	p11.2	0.0789026	0.0319813	0.212117	FALSE	1618	FALSE	0.262448	FALSE	927	FALSE
CIC	SON	21	q22.11	0.0788865	0.0320164	0.212117	FALSE	1619	FALSE	0.262448	FALSE	928	FALSE
CIC	POMT2	14	q24.3	0.0788766	0.0320379	0.212117	FALSE	1620	FALSE	0.262448	FALSE	929	FALSE
CIC	ABHD14B	3	p21.2	0.0788509	0.0320943	0.21227	FALSE	1621	FALSE	0.26248	FALSE	930	FALSE
CIC	FAM193B	5	q35.3	0.0788396	0.0321189	0.21227	FALSE	1622	FALSE	0.26248	FALSE	931	FALSE
CIC	SP5	2	q31.1	0.0788059	0.0321929	0.21256	FALSE	1623	FALSE	0.262838	FALSE	932	FALSE
CIC	TMEM147	19	q13.12	0.0788011	0.0322034	0.21256	FALSE	1624	FALSE	NA	NA	NA	NA
CIC	PDE6B	4	p16.3	0.0787749	0.0322608	0.212671	FALSE	1625	FALSE	0.262854	FALSE	933	FALSE
CIC	ARHGEF4	2	q21.1	0.0787299	0.0323599	0.21302	FALSE	1626	FALSE	0.263158	FALSE	934	FALSE
CIC	PFDN2	1	q23.3	0.0787297	0.0323603	0.21302	FALSE	1627	FALSE	0.263158	FALSE	935	FALSE
CIC	CUX1	7	q22.1	0.0787243	0.0323722	0.213022	FALSE	1628	FALSE	0.263158	FALSE	936	FALSE
CIC	CD79B	17	q23.3	0.0787019	0.0324215	0.213194	FALSE	1629	FALSE	0.263307	FALSE	937	FALSE
CIC	MCUB	4	q25	0.0786705	0.0324911	0.213498	FALSE	1630	FALSE	0.26362	FALSE	938	FALSE
CIC	ARHGEF35	7	q35	0.078649	0.0325386	0.213657	FALSE	1631	FALSE	0.263753	FALSE	939	FALSE
CIC	CA12	15	q22.2	0.0785906	0.0326682	0.214169	FALSE	1632	FALSE	0.264166	FALSE	940	FALSE
CIC	SYNDIG1L	14	q24.3	0.0785851	0.0326803	0.214169	FALSE	1633	FALSE	0.264166	FALSE	941	FALSE
CIC	RPIA	2	p11.2	0.0785677	0.0327191	0.214228	FALSE	1634	FALSE	0.264209	FALSE	942	FALSE
CIC	HELZ2	20	q13.33	0.0785614	0.0343097	0.219699	FALSE	1635	FALSE	0.269624	FALSE	943	FALSE
CIC	CHMP7	8	p21.3	0.0785377	0.0327858	0.214589	FALSE	1636	FALSE	0.264622	FALSE	944	FALSE
CIC	C9orf57	9	q21.13	0.0784797	0.0329153	0.215129	FALSE	1637	FALSE	0.265163	FALSE	945	FALSE
CIC	CCL23	17	q12	0.0784599	0.0329595	0.215264	FALSE	1638	FALSE	0.265268	FALSE	946	FALSE
CIC	SRRD	22	q12.1	0.0784503	0.0329811	0.215315	FALSE	1639	FALSE	0.265268	FALSE	947	FALSE
CIC	UBC	12	q24.31	0.0784306	0.0330252	0.215421	FALSE	1640	FALSE	0.26542	FALSE	948	FALSE
CIC	NREP	5	q22.1	0.0784071	0.0330779	0.215653	FALSE	1641	FALSE	0.265718	FALSE	949	FALSE
CIC	IZUMO3	9	p21.3	0.0783866	0.0331241	0.215801	FALSE	1642	FALSE	0.265837	FALSE	950	FALSE
CIC	LAMP1	13	q34	0.0783658	0.0331707	0.215951	FALSE	1643	FALSE	0.265961	FALSE	951	FALSE
CIC	PPFIA2	12	q21.31	0.0783509	0.0332045	0.216094	FALSE	1644	FALSE	0.266105	FALSE	952	FALSE
CIC	POU3F3	2	q12.1	0.0782819	0.03336	0.216645	FALSE	1645	FALSE	0.266589	FALSE	953	FALSE
CIC	DAAM1	14	q23.1	0.0782755	0.0333746	0.216663	FALSE	1646	FALSE	0.266589	FALSE	954	FALSE
CIC	OGFOD2	12	q24.31	0.0782536	0.0350226	0.221633	FALSE	1647	FALSE	0.271214	FALSE	955	FALSE
CIC	AMBRA1	11	p11.2	0.0782103	0.0335225	0.217162	FALSE	1648	FALSE	0.267018	FALSE	956	FALSE
CIC	ZNF548	19	q13.43	0.0781847	0.0335806	0.217385	FALSE	1649	FALSE	NA	NA	NA	NA
CIC	SH3PXD2B	5	q35.1	0.0781693	0.0336156	0.217534	FALSE	1650	FALSE	0.267336	FALSE	957	FALSE
CIC	TFIP11	22	q12.1	0.0781518	0.0336554	0.217544	FALSE	1651	FALSE	0.267336	FALSE	958	FALSE
CIC	PRSS50	3	p21.31	0.0781473	0.0336658	0.217544	FALSE	1652	FALSE	0.267336	FALSE	959	FALSE
CIC	GRM3	7	q21.11	0.0780961	0.0337828	0.217924	FALSE	1653	FALSE	0.267692	FALSE	960	FALSE
CIC	DEFB104A	8	p23.1	0.0780671	0.0338489	0.21812	FALSE	1654	FALSE	0.26786	FALSE	961	FALSE
CIC	ESCO1	18	q11.2	0.0780531	0.033881	0.218251	FALSE	1655	FALSE	0.26799	FALSE	962	FALSE
CIC	AURKC	19	q13.43	0.0780311	0.035546	0.223402	FALSE	1656	FALSE	NA	NA	NA	NA
CIC	ZNF878	19	p13.2	0.0780097	0.0339806	0.218815	FALSE	1657	FALSE	NA	NA	NA	NA
CIC	TSPAN6	X	q22.1	0.0779958	0.0399623	0.237174	FALSE	1658	FALSE	0.287222	FALSE	963	FALSE
CIC	ZNF383	19	q13.12	0.0779914	0.0340228	0.218938	FALSE	1659	FALSE	NA	NA	NA	NA
CIC	DNAJC27	2	p23.3	0.077991	0.0340235	0.218938	FALSE	1660	FALSE	0.268992	FALSE	964	FALSE
CIC	PHTF2	7	q11.23	0.0779596	0.0340959	0.219173	FALSE	1661	FALSE	0.269188	FALSE	965	FALSE
CIC	KRT13	17	q21.2	0.0779415	0.0341378	0.219365	FALSE	1662	FALSE	0.269394	FALSE	966	FALSE
CIC	PMPCA	9	q34.3	0.0779335	0.0341561	0.219406	FALSE	1663	FALSE	0.269413	FALSE	967	FALSE
CIC	GHRH	20	q11.23	0.0778927	0.0342504	0.219699	FALSE	1664	FALSE	0.2696	FALSE	968	FALSE
CIC	NDUFB9	8	q24.13	0.0778852	0.0342677	0.219699	FALSE	1665	FALSE	0.2696	FALSE	969	FALSE
CIC	ZNF91	19	p12	0.0778677	0.0343082	0.219699	FALSE	1666	FALSE	NA	NA	NA	NA
CIC	OR11H6	14	q11.2	0.0778673	0.0343093	0.219699	FALSE	1667	FALSE	0.269624	FALSE	970	FALSE
CIC	KCTD5	16	p13.3	0.0778436	0.0343641	0.219917	FALSE	1668	FALSE	0.269701	FALSE	971	FALSE
CIC	C9orf135	NA	NA	0.0778421	0.0343677	0.219917	FALSE	1669	FALSE	0.269701	FALSE	972	FALSE
CIC	SPATA17	1	q41	0.0777729	0.0345286	0.220182	FALSE	1670	FALSE	0.269701	FALSE	973	FALSE
CIC	EPS8	12	p12.3	0.0777599	0.0345588	0.220182	FALSE	1671	FALSE	0.269701	FALSE	974	FALSE
CIC	VMO1	17	p13.2	0.0777515	0.0345784	0.220182	FALSE	1672	FALSE	0.269701	FALSE	975	FALSE
CIC	C2orf78	2	p13.1	0.0777508	0.0345801	0.220182	FALSE	1673	FALSE	0.269701	FALSE	976	FALSE
CIC	UBA6	4	q13.2	0.0777468	0.0345893	0.220182	FALSE	1674	FALSE	0.269701	FALSE	977	FALSE
CIC	CACNA1I	22	q13.1	0.0777108	0.0346735	0.220494	FALSE	1675	FALSE	0.269992	FALSE	978	FALSE
CIC	FAM222B	17	q11.2	0.0777104	0.0346742	0.220494	FALSE	1676	FALSE	0.269992	FALSE	979	FALSE
CIC	ASB9	X	p22.2	0.0776847	0.0407644	0.239128	FALSE	1677	FALSE	0.289025	FALSE	980	FALSE
CIC	HSPB6	19	q13.12	0.0776763	0.0347542	0.220777	FALSE	1678	FALSE	NA	NA	NA	NA
CIC	SLC38A2	12	q13.11	0.077676	0.0347549	0.220777	FALSE	1679	FALSE	0.270372	FALSE	981	FALSE
CIC	SLC7A8	14	q11.2	0.0776215	0.0348826	0.221289	FALSE	1680	FALSE	0.27088	FALSE	982	FALSE
CIC	MRPL1	4	q21.1	0.0776082	0.034914	0.221404	FALSE	1681	FALSE	0.27099	FALSE	983	FALSE
CIC	WDR27	6	q27	0.0775801	0.0349801	0.221532	FALSE	1682	FALSE	0.271027	FALSE	984	FALSE
CIC	MAPK8IP1	11	p11.2	0.0775791	0.0349825	0.221532	FALSE	1683	FALSE	0.271027	FALSE	985	FALSE
CIC	DHDH	19	q13.33	0.0775725	0.034998	0.221553	FALSE	1684	FALSE	NA	NA	NA	NA
CIC	FIBCD1	9	q34.12	0.0774583	0.035268	0.22261	FALSE	1685	FALSE	0.272169	FALSE	986	FALSE
CIC	RPS10	6	p21.31	0.0774557	0.0352742	0.22261	FALSE	1686	FALSE	0.272169	FALSE	987	FALSE
CIC	AVL9	7	p14.3	0.077449	0.0352901	0.222634	FALSE	1687	FALSE	0.272169	FALSE	988	FALSE
CIC	PRR32	X	q25	0.0774379	0.0414102	0.241084	FALSE	1688	FALSE	0.290864	FALSE	989	FALSE
CIC	KCNJ5	11	q24.3	0.0774322	0.0353299	0.222731	FALSE	1689	FALSE	0.27221	FALSE	990	FALSE
CIC	DCX	X	q23	0.0774244	0.0414456	0.241186	FALSE	1690	FALSE	0.290932	FALSE	991	FALSE
CIC	C12orf75	12	q23.3	0.0774039	0.0353971	0.222925	FALSE	1691	FALSE	0.272376	FALSE	992	FALSE
CIC	XKR7	20	q11.21	0.0773846	0.035443	0.223138	FALSE	1692	FALSE	0.272607	FALSE	993	FALSE
CIC	GLIPR1L1	12	q21.2	0.0773642	0.0354916	0.223225	FALSE	1693	FALSE	0.272734	FALSE	994	FALSE
CIC	RNF126	19	p13.3	0.0773635	0.0354935	0.223225	FALSE	1694	FALSE	NA	NA	NA	NA
CIC	LEAP2	5	q31.1	0.0773243	0.0355869	0.223566	FALSE	1695	FALSE	0.273169	FALSE	995	FALSE
CIC	SPOUT1	9	q34.11	0.0773203	0.0355965	0.223566	FALSE	1696	FALSE	0.273169	FALSE	996	FALSE
CIC	RPL9	4	p14	0.0773116	0.0356172	0.22362	FALSE	1697	FALSE	0.273185	FALSE	997	FALSE
CIC	TGM7	15	q15.3	0.0773005	0.0356438	0.223671	FALSE	1698	FALSE	0.273185	FALSE	998	FALSE
CIC	OR51L1	11	p15.4	0.0772925	0.0356629	0.223677	FALSE	1699	FALSE	0.273185	FALSE	999	FALSE
CIC	CAMSAP3	19	p13.2	0.077252	0.03576	0.224209	FALSE	1700	FALSE	NA	NA	NA	NA
CIC	TNNI3	19	q13.42	0.077218	0.0358417	0.224414	FALSE	1701	FALSE	NA	NA	NA	NA
CIC	MC3R	20	q13.2	0.0771733	0.0359494	0.224936	FALSE	1702	FALSE	0.274761	FALSE	1000	FALSE
CIC	TAF5L	1	q42.13	0.0771147	0.0377718	0.229675	FALSE	1703	FALSE	0.279393	FALSE	1001	FALSE
CIC	SUPT20H	13	q13.3	0.0770794	0.0378598	0.229905	FALSE	1704	FALSE	0.279679	FALSE	1002	FALSE
CIC	SLC39A7	6	p21.32	0.077065	0.0362113	0.225957	FALSE	1705	FALSE	0.275771	FALSE	1003	FALSE
CIC	KIRREL2	19	q13.12	0.0770398	0.0362725	0.226185	FALSE	1706	FALSE	NA	NA	NA	NA
CIC	CDH11	16	q21	0.0770096	0.036346	0.226319	FALSE	1707	FALSE	0.276103	FALSE	1004	FALSE
CIC	C14orf93	14	q11.2	0.0770066	0.0363533	0.226319	FALSE	1708	FALSE	0.276103	FALSE	1005	FALSE
CIC	RPL6	12	q24.13	0.0769983	0.0363734	0.226319	FALSE	1709	FALSE	0.276103	FALSE	1006	FALSE
CIC	EPS15L1	19	p13.11	0.0769867	0.0364017	0.226319	FALSE	1710	FALSE	NA	NA	NA	NA
CIC	MAP1LC3B2	12	q24.22	0.0769802	0.0364174	0.226319	FALSE	1711	FALSE	0.276103	FALSE	1007	FALSE
CIC	MAGEA8	X	q28	0.0769775	0.042638	0.244404	FALSE	1712	FALSE	0.293574	FALSE	1008	FALSE
CIC	ZNF549	19	q13.43	0.0769622	0.0364613	0.226362	FALSE	1713	FALSE	NA	NA	NA	NA
CIC	CTAG1A	X	q28	0.076941	0.0427367	0.244404	FALSE	1714	FALSE	0.293574	FALSE	1009	FALSE
CIC	PSENEN	19	q13.12	0.0769384	0.0365195	0.226512	FALSE	1715	FALSE	NA	NA	NA	NA
CIC	PITPNB	22	q12.1	0.0769217	0.0365603	0.226563	FALSE	1716	FALSE	0.276352	FALSE	1010	FALSE
CIC	GRSF1	4	q13.3	0.0769145	0.036578	0.226563	FALSE	1717	FALSE	0.276352	FALSE	1011	FALSE
CIC	POLR2H	3	q27.1	0.0768759	0.038371	0.231687	FALSE	1718	FALSE	0.281569	FALSE	1012	FALSE
CIC	SLC24A3	20	p11.23	0.0768572	0.0367183	0.227111	FALSE	1719	FALSE	0.276902	FALSE	1013	FALSE
CIC	UBTF	17	q21.31	0.0768552	0.0384233	0.231791	FALSE	1720	FALSE	0.281638	FALSE	1014	FALSE
CIC	RAB8A	19	p13.11	0.0768445	0.0367496	0.227228	FALSE	1721	FALSE	NA	NA	NA	NA
CIC	ERCC2	19	q13.32	0.076831	0.0384846	0.232009	FALSE	1722	FALSE	NA	NA	NA	NA
CIC	AP4E1	15	q21.2	0.0768245	0.0367986	0.227304	FALSE	1723	FALSE	0.277236	FALSE	1015	FALSE
CIC	WTIP	19	q13.11	0.0768207	0.036808	0.227304	FALSE	1724	FALSE	NA	NA	NA	NA
CIC	ZNF568	19	q13.12	0.0767983	0.0368631	0.227537	FALSE	1725	FALSE	NA	NA	NA	NA
CIC	HTN1	4	q13.3	0.0767912	0.0368806	0.227537	FALSE	1726	FALSE	0.277555	FALSE	1016	FALSE
CIC	HERC5	4	q22.1	0.0767528	0.0369753	0.227791	FALSE	1727	FALSE	0.277716	FALSE	1017	FALSE
CIC	TALDO1	11	p15.5	0.0767469	0.0369898	0.227791	FALSE	1728	FALSE	0.277716	FALSE	1018	FALSE
CIC	TIGD6	5	q32	0.0767404	0.037006	0.227814	FALSE	1729	FALSE	0.277716	FALSE	1019	FALSE
CIC	DEFB128	20	p13	0.0767272	0.0370385	0.227862	FALSE	1730	FALSE	0.277716	FALSE	1020	FALSE
CIC	ANKRD10	13	q34	0.0766929	0.0371234	0.228241	FALSE	1731	FALSE	0.278119	FALSE	1021	FALSE
CIC	HSFX1	X	q28	0.0766681	0.0434802	0.246257	FALSE	1732	FALSE	0.295399	FALSE	1022	FALSE
CIC	INSL3	19	p13.11	0.076621	0.037302	0.229098	FALSE	1733	FALSE	NA	NA	NA	NA
CIC	AMPD3	11	p15.4	0.0765948	0.0373673	0.229161	FALSE	1734	FALSE	0.279023	FALSE	1023	FALSE
CIC	FPR2	19	q13.41	0.0765937	0.0373699	0.229161	FALSE	1735	FALSE	NA	NA	NA	NA
CIC	FITM1	14	q12	0.0765909	0.0373768	0.229161	FALSE	1736	FALSE	0.279023	FALSE	1024	FALSE
CIC	LRRC25	19	p13.11	0.0765499	0.0374792	0.229161	FALSE	1737	FALSE	NA	NA	NA	NA
CIC	TPK1	7	q35	0.0765477	0.0374846	0.229161	FALSE	1738	FALSE	0.279023	FALSE	1025	FALSE
CIC	CRIP2	14	q32.33	0.0765394	0.0375053	0.229161	FALSE	1739	FALSE	0.279023	FALSE	1026	FALSE
CIC	GSAP	7	q11.23	0.0765316	0.0375248	0.229161	FALSE	1740	FALSE	0.279023	FALSE	1027	FALSE
CIC	PYGO2	1	q21.3	0.0765315	0.0392491	0.234611	FALSE	1741	FALSE	0.284501	FALSE	1028	FALSE
CIC	PRRC2C	1	q24.3	0.0765144	0.0375679	0.229248	FALSE	1742	FALSE	0.279042	FALSE	1029	FALSE
CIC	PTGFRN	1	p13.1	0.076511	0.0375765	0.229248	FALSE	1743	FALSE	0.279042	FALSE	1030	FALSE
CIC	RBM8A	1	q21.1	0.0764912	0.0393531	0.235022	FALSE	1744	FALSE	0.284978	FALSE	1031	FALSE
CIC	SMC1B	22	q13.31	0.0764842	0.0393712	0.235022	FALSE	1745	FALSE	0.284978	FALSE	1032	FALSE
CIC	C11orf1	11	q23.1	0.07647	0.0376792	0.229663	FALSE	1746	FALSE	0.279373	FALSE	1033	FALSE
CIC	TPD52L2	20	q13.33	0.0764553	0.0377162	0.229663	FALSE	1747	FALSE	0.279373	FALSE	1034	FALSE
CIC	CCIN	9	p13.3	0.0764551	0.0377165	0.229663	FALSE	1748	FALSE	0.279373	FALSE	1035	FALSE
CIC	CD274	9	p24.1	0.0764538	0.0377198	0.229663	FALSE	1749	FALSE	0.279373	FALSE	1036	FALSE
CIC	PSMD8	19	q13.2	0.0764408	0.0377524	0.229675	FALSE	1750	FALSE	NA	NA	NA	NA
CIC	DENND1C	19	p13.3	0.0764193	0.0378065	0.229734	FALSE	1751	FALSE	NA	NA	NA	NA
CIC	ELK4	1	q32.1	0.0763847	0.0378936	0.230034	FALSE	1752	FALSE	0.279807	FALSE	1037	FALSE
CIC	WIPI2	7	p22.1	0.0763563	0.0379654	0.230378	FALSE	1753	FALSE	0.280167	FALSE	1038	FALSE
CIC	MOB3A	19	p13.3	0.0762872	0.0381403	0.231073	FALSE	1754	FALSE	NA	NA	NA	NA
CIC	PALM	19	p13.3	0.0762744	0.0381727	0.231119	FALSE	1755	FALSE	NA	NA	NA	NA
CIC	MC1R	16	q24.3	0.0762167	0.0383192	0.231687	FALSE	1756	FALSE	0.281569	FALSE	1039	FALSE
CIC	MCFD2	2	p21	0.0761798	0.0384131	0.231791	FALSE	1757	FALSE	0.281638	FALSE	1040	FALSE
CIC	MFSD14B	9	q22.32	0.0761413	0.0385115	0.232088	FALSE	1758	FALSE	0.281866	FALSE	1041	FALSE
CIC	SPATA31A6	9	p11.2	0.0761203	0.0385652	0.232089	FALSE	1759	FALSE	0.281866	FALSE	1042	FALSE
CIC	ATXN1	6	p22.3	0.0761198	0.0385664	0.232089	FALSE	1760	FALSE	0.281866	FALSE	1043	FALSE
CIC	COIL	17	q22	0.0760958	0.0386281	0.232244	FALSE	1761	FALSE	0.281994	FALSE	1044	FALSE
CIC	ITCH	20	q11.22	0.076092	0.0386377	0.232244	FALSE	1762	FALSE	0.281994	FALSE	1045	FALSE
CIC	SLC11A2	12	q13.12	0.0760282	0.0388015	0.232923	FALSE	1763	FALSE	0.282703	FALSE	1046	FALSE
CIC	RPA1	17	p13.3	0.0759901	0.0388998	0.233284	FALSE	1764	FALSE	0.283056	FALSE	1047	FALSE
CIC	CLPX	15	q22.31	0.0759547	0.038991	0.233678	FALSE	1765	FALSE	0.283477	FALSE	1048	FALSE
CIC	C12orf66	NA	NA	0.0759344	0.0390434	0.23384	FALSE	1766	FALSE	0.283614	FALSE	1049	FALSE
CIC	PSG5	19	q13.31	0.075875	0.0391974	0.234379	FALSE	1767	FALSE	NA	NA	NA	NA
CIC	PSPN	19	p13.3	0.075832	0.039309	0.234893	FALSE	1768	FALSE	NA	NA	NA	NA
CIC	MORC3	21	q22.12	0.0758096	0.0393673	0.235022	FALSE	1769	FALSE	0.284978	FALSE	1050	FALSE
CIC	GNPDA2	4	p12	0.0757895	0.0394195	0.235134	FALSE	1770	FALSE	0.285056	FALSE	1051	FALSE
CIC	PLOD3	7	q22.1	0.0757624	0.0412721	0.240662	FALSE	1771	FALSE	0.290494	FALSE	1052	FALSE
CIC	CCDC105	19	p13.12	0.075755	0.0395096	0.235478	FALSE	1772	FALSE	NA	NA	NA	NA
CIC	MTERF2	12	q23.3	0.0757369	0.039557	0.235607	FALSE	1773	FALSE	0.285637	FALSE	1053	FALSE
CIC	SOX5	12	p12.1	0.0757223	0.0395951	0.235758	FALSE	1774	FALSE	0.285791	FALSE	1054	FALSE
CIC	CCPG1	15	q21.3	0.0756954	0.0396657	0.235968	FALSE	1775	FALSE	0.28596	FALSE	1055	FALSE
CIC	C17orf64	17	q23.2	0.0756941	0.0396691	0.235968	FALSE	1776	FALSE	0.28596	FALSE	1056	FALSE
CIC	MICAL1	6	q21	0.0756761	0.0397163	0.236172	FALSE	1777	FALSE	0.28618	FALSE	1057	FALSE
CIC	C16orf91	16	p13.3	0.0755956	0.0399279	0.237174	FALSE	1778	FALSE	0.287222	FALSE	1058	FALSE
CIC	RASA4B	7	q22.1	0.075591	0.03994	0.237174	FALSE	1779	FALSE	0.287222	FALSE	1059	FALSE
CIC	CD63	12	q13.2	0.0755555	0.0400337	0.237443	FALSE	1780	FALSE	0.287423	FALSE	1060	FALSE
CIC	ZNF703	8	p11.23	0.0755476	0.0400544	0.237457	FALSE	1781	FALSE	0.287423	FALSE	1061	FALSE
CIC	EIF2S2	20	q11.22	0.0755399	0.0400749	0.237457	FALSE	1782	FALSE	0.287423	FALSE	1062	FALSE
CIC	ZNF528	19	q13.41	0.0755139	0.0401435	0.237634	FALSE	1783	FALSE	NA	NA	NA	NA
CIC	DAZAP2	12	q13.13	0.0755072	0.0401615	0.237663	FALSE	1784	FALSE	0.28768	FALSE	1063	FALSE
CIC	C6orf48	NA	NA	0.0754814	0.0402299	0.237862	FALSE	1785	FALSE	0.287786	FALSE	1064	FALSE
CIC	FUOM	10	q26.3	0.0754593	0.0402884	0.237862	FALSE	1786	FALSE	0.287786	FALSE	1065	FALSE
CIC	NXT1	20	p11.21	0.0754505	0.0403118	0.237862	FALSE	1787	FALSE	0.287786	FALSE	1066	FALSE
CIC	RFPL4AL1	19	q13.42	0.0754505	0.0403118	0.237862	FALSE	1788	FALSE	NA	NA	NA	NA
CIC	GIPC1	19	p13.12	0.0754281	0.0403714	0.23806	FALSE	1789	FALSE	NA	NA	NA	NA
CIC	LIN7A	12	q21.31	0.0754172	0.0404003	0.238115	FALSE	1790	FALSE	0.288101	FALSE	1067	FALSE
CIC	EN1	2	q14.2	0.0753978	0.040452	0.238229	FALSE	1791	FALSE	0.288183	FALSE	1068	FALSE
CIC	EIF2S3	X	p22.11	0.0753943	0.0470971	0.256927	FALSE	1792	FALSE	0.306254	FALSE	1069	FALSE
CIC	TTC1	5	q33.3	0.0753873	0.0404799	0.238317	FALSE	1793	FALSE	0.28826	FALSE	1070	FALSE
CIC	GPX3	5	q33.1	0.0753418	0.0406014	0.238755	FALSE	1794	FALSE	0.288678	FALSE	1071	FALSE
CIC	IGFBP6	12	q13.13	0.0753399	0.0406064	0.238755	FALSE	1795	FALSE	0.288678	FALSE	1072	FALSE
CIC	DCTPP1	16	p11.2	0.0753322	0.040627	0.238799	FALSE	1796	FALSE	0.288703	FALSE	1073	FALSE
CIC	RFXANK	19	p13.11	0.0753008	0.0407112	0.239064	FALSE	1797	FALSE	NA	NA	NA	NA
CIC	ISY1	3	q21.3	0.075292	0.0407347	0.239126	FALSE	1798	FALSE	0.289025	FALSE	1074	FALSE
CIC	RASSF3	12	q14.2	0.0752868	0.0407488	0.239128	FALSE	1799	FALSE	0.289025	FALSE	1075	FALSE
CIC	UBASH3B	11	q24.1	0.0752412	0.0408711	0.239543	FALSE	1800	FALSE	0.289469	FALSE	1076	FALSE
CIC	MUC22	6	p21.33	0.0752144	0.0409431	0.239678	FALSE	1801	FALSE	0.289474	FALSE	1077	FALSE
CIC	SLC44A2	19	p13.2	0.0752018	0.0409772	0.239678	FALSE	1802	FALSE	NA	NA	NA	NA
CIC	AUNIP	1	p36.11	0.0751874	0.0410159	0.239678	FALSE	1803	FALSE	0.289474	FALSE	1078	FALSE
CIC	SRRT	7	q22.1	0.0751871	0.0410168	0.239678	FALSE	1804	FALSE	0.289474	FALSE	1079	FALSE
CIC	C1orf162	1	p13.2	0.0751477	0.041123	0.240098	FALSE	1805	FALSE	0.289924	FALSE	1080	FALSE
CIC	LGR4	11	p14.1	0.0750256	0.0414541	0.241186	FALSE	1806	FALSE	0.290932	FALSE	1081	FALSE
CIC	HPS5	11	p15.1	0.0749629	0.0416248	0.241643	FALSE	1807	FALSE	0.291288	FALSE	1082	FALSE
CIC	XRN2	20	p11.22	0.0749172	0.0417499	0.242215	FALSE	1808	FALSE	0.29181	FALSE	1083	FALSE
CIC	ITK	5	q33.3	0.0749096	0.0417706	0.242259	FALSE	1809	FALSE	0.29181	FALSE	1084	FALSE
CIC	PKIA	8	q21.13	0.0748992	0.0417991	0.24233	FALSE	1810	FALSE	0.29181	FALSE	1085	FALSE
CIC	CNTN5	11	q22.1	0.0748907	0.0418224	0.24233	FALSE	1811	FALSE	0.29181	FALSE	1086	FALSE
CIC	PDLIM1	10	q23.33	0.0748782	0.0418566	0.242374	FALSE	1812	FALSE	0.29181	FALSE	1087	FALSE
CIC	HAVCR1	5	q33.3	0.0748428	0.0419538	0.242419	FALSE	1813	FALSE	0.29181	FALSE	1088	FALSE
CIC	VSTM2A	7	p11.2	0.0748422	0.0419556	0.242419	FALSE	1814	FALSE	0.29181	FALSE	1089	FALSE
CIC	RANBP2	2	q13	0.0748312	0.0419857	0.24248	FALSE	1815	FALSE	0.291828	FALSE	1090	FALSE
CIC	CDC14A	1	p21.2	0.0747895	0.0421005	0.242947	FALSE	1816	FALSE	0.292308	FALSE	1091	FALSE
CIC	KRT73	12	q13.13	0.0747653	0.0421673	0.243175	FALSE	1817	FALSE	0.292555	FALSE	1092	FALSE
CIC	PNRC1	6	q15	0.0747555	0.0421943	0.243254	FALSE	1818	FALSE	0.292623	FALSE	1093	FALSE
CIC	RHOT2	16	p13.3	0.0747375	0.042244	0.243464	FALSE	1819	FALSE	0.292848	FALSE	1094	FALSE
CIC	VAV1	19	p13.3	0.0747276	0.0422713	0.243545	FALSE	1820	FALSE	NA	NA	NA	NA
CIC	FAM50A	X	q28	0.0747219	0.0491062	0.262391	FALSE	1821	FALSE	0.312273	FALSE	1095	FALSE
CIC	RNF122	8	p12	0.0746828	0.0423956	0.243954	FALSE	1822	FALSE	0.29342	FALSE	1096	FALSE
CIC	CDX2	13	q12.2	0.0746751	0.0424169	0.244	FALSE	1823	FALSE	0.29342	FALSE	1097	FALSE
CIC	NFKBID	19	q13.12	0.0746467	0.0424958	0.244214	FALSE	1824	FALSE	NA	NA	NA	NA
CIC	SNRNP200	2	q11.2	0.0746414	0.0425105	0.244214	FALSE	1825	FALSE	0.293574	FALSE	1098	FALSE
CIC	RTL4	X	q23	0.0746383	0.0493611	0.263063	FALSE	1826	FALSE	0.312958	FALSE	1099	FALSE
CIC	NPPC	2	q37.1	0.0746326	0.042535	0.244214	FALSE	1827	FALSE	0.293574	FALSE	1100	FALSE
CIC	NUP155	5	p13.2	0.0746233	0.0425606	0.244214	FALSE	1828	FALSE	0.293574	FALSE	1101	FALSE
CIC	APOL1	22	q12.3	0.0746209	0.0425673	0.244214	FALSE	1829	FALSE	0.293574	FALSE	1102	FALSE
CIC	NHLRC1	6	p22.3	0.0746186	0.0425737	0.244214	FALSE	1830	FALSE	0.293574	FALSE	1103	FALSE
CIC	CCDC166	8	q24.3	0.0746185	0.042574	0.244214	FALSE	1831	FALSE	0.293574	FALSE	1104	FALSE
CIC	RNF20	9	q31.1	0.0745899	0.0445249	0.249663	FALSE	1832	FALSE	0.299308	FALSE	1105	FALSE
CIC	ZNF146	19	q13.12	0.0745636	0.042727	0.244404	FALSE	1833	FALSE	NA	NA	NA	NA
CIC	PEG10	7	q21.3	0.0745563	0.0427473	0.244404	FALSE	1834	FALSE	0.293574	FALSE	1106	FALSE
CIC	PSMD7	16	q23.1	0.0745502	0.0427645	0.244404	FALSE	1835	FALSE	0.293574	FALSE	1107	FALSE
CIC	MTRNR2L3	NA	NA	0.0745451	0.0427786	0.244404	FALSE	1836	FALSE	0.293574	FALSE	1108	FALSE
CIC	TXNL4A	18	q23	0.0745252	0.0428343	0.244502	FALSE	1837	FALSE	0.29361	FALSE	1109	FALSE
CIC	BAZ1A	14	q13.2	0.0745081	0.0447598	0.250483	FALSE	1838	FALSE	0.300129	FALSE	1110	FALSE
CIC	OR2A1	7	q35	0.0745042	0.0428931	0.244743	FALSE	1839	FALSE	0.293872	FALSE	1111	FALSE
CIC	FBXO17	19	q13.2	0.0744852	0.0429464	0.244895	FALSE	1840	FALSE	NA	NA	NA	NA
CIC	OLIG3	6	q23.3	0.0744588	0.0430203	0.244935	FALSE	1841	FALSE	0.294017	FALSE	1112	FALSE
CIC	TEX28	X	q28	0.0744471	0.0499478	0.264651	FALSE	1842	FALSE	0.314449	FALSE	1113	FALSE
CIC	RRP15	1	q41	0.0744411	0.04307	0.24499	FALSE	1843	FALSE	0.294017	FALSE	1114	FALSE
CIC	SCML2	X	p22.13	0.0744181	0.0518958	0.270929	FALSE	1844	FALSE	0.320922	FALSE	1115	FALSE
CIC	MAGEB10	X	p21.3	0.0743893	0.0501261	0.265213	FALSE	1845	FALSE	0.314989	FALSE	1116	FALSE
CIC	ZNF69	19	p13.2	0.074384	0.0432307	0.245523	FALSE	1846	FALSE	NA	NA	NA	NA
CIC	C1orf21	1	q25.3	0.0743751	0.0432558	0.245589	FALSE	1847	FALSE	0.294694	FALSE	1117	FALSE
CIC	ZNF614	19	q13.41	0.0743415	0.0433508	0.2459	FALSE	1848	FALSE	NA	NA	NA	NA
CIC	CASC10	NA	NA	0.0743227	0.0434037	0.246125	FALSE	1849	FALSE	0.295347	FALSE	1118	FALSE
CIC	CDKN1C	11	p15.4	0.0743	0.0434679	0.246257	FALSE	1850	FALSE	0.295399	FALSE	1119	FALSE
CIC	BORCS6	17	p13.1	0.0742955	0.0434809	0.246257	FALSE	1851	FALSE	0.295399	FALSE	1120	FALSE
CIC	PCDHGA11	5	q31.3	0.074282	0.0435189	0.246396	FALSE	1852	FALSE	0.295539	FALSE	1121	FALSE
CIC	NACC1	19	p13.13	0.0742184	0.0436997	0.247091	FALSE	1853	FALSE	NA	NA	NA	NA
CIC	TEPSIN	17	q25.3	0.0741976	0.0437588	0.247197	FALSE	1854	FALSE	0.296403	FALSE	1122	FALSE
CIC	TMEM14C	6	p24.2	0.0741733	0.0438281	0.247459	FALSE	1855	FALSE	0.296679	FALSE	1123	FALSE
CIC	ATXN3	14	q32.12	0.0741677	0.0438439	0.247472	FALSE	1856	FALSE	0.296679	FALSE	1124	FALSE
CIC	ZMYM1	1	p34.3	0.0741396	0.0439241	0.2477	FALSE	1857	FALSE	0.296963	FALSE	1125	FALSE
CIC	CEACAM8	19	q13.2	0.0741391	0.0439257	0.2477	FALSE	1858	FALSE	NA	NA	NA	NA
CIC	LATS2	13	q12.11	0.0741347	0.0439382	0.2477	FALSE	1859	FALSE	0.296963	FALSE	1126	FALSE
CIC	HOOK2	19	p13.13	0.0741202	0.0439797	0.247857	FALSE	1860	FALSE	NA	NA	NA	NA
CIC	ETV1	7	p21.2	0.0741067	0.0440182	0.247998	FALSE	1861	FALSE	0.297385	FALSE	1127	FALSE
CIC	UROD	1	p34.1	0.0740862	0.0440769	0.248104	FALSE	1862	FALSE	0.297524	FALSE	1128	FALSE
CIC	TNFSF14	19	p13.3	0.0740836	0.0440844	0.248104	FALSE	1863	FALSE	NA	NA	NA	NA
CIC	ECD	10	q22.2	0.074082	0.0459997	0.254256	FALSE	1864	FALSE	0.304117	FALSE	1129	FALSE
CIC	TRIM58	1	q44	0.0740812	0.0440912	0.248104	FALSE	1865	FALSE	0.297524	FALSE	1130	FALSE
CIC	LMTK3	19	q13.33	0.0740698	0.0441239	0.248212	FALSE	1866	FALSE	NA	NA	NA	NA
CIC	TMEM259	19	p13.3	0.0740346	0.044225	0.248705	FALSE	1867	FALSE	NA	NA	NA	NA
CIC	ZBTB43	9	q33.3	0.0740126	0.0442881	0.248877	FALSE	1868	FALSE	0.298523	FALSE	1131	FALSE
CIC	LRIG1	3	p14.1	0.0740098	0.0442963	0.248877	FALSE	1869	FALSE	0.298523	FALSE	1132	FALSE
CIC	SLC23A3	2	q35	0.0739981	0.04433	0.248913	FALSE	1870	FALSE	0.298523	FALSE	1133	FALSE
CIC	EXOC3	5	p15.33	0.0739683	0.0444157	0.249242	FALSE	1871	FALSE	0.298883	FALSE	1134	FALSE
CIC	CNR1	6	q15	0.0739583	0.0444446	0.249328	FALSE	1872	FALSE	0.298959	FALSE	1135	FALSE
CIC	CA13	8	q21.2	0.073904	0.0446015	0.249978	FALSE	1873	FALSE	0.299659	FALSE	1136	FALSE
CIC	MOSPD1	X	q26.3	0.0738255	0.0518956	0.270929	FALSE	1874	FALSE	0.320922	FALSE	1137	FALSE
CIC	RNF215	22	q12.2	0.0738062	0.0448852	0.251031	FALSE	1875	FALSE	0.300733	FALSE	1138	FALSE
CIC	PLAC1	X	q26.3	0.0738039	0.0519647	0.271106	FALSE	1876	FALSE	0.321082	FALSE	1139	FALSE
CIC	TNNI2	11	p15.5	0.0737976	0.0449104	0.25109	FALSE	1877	FALSE	0.300749	FALSE	1140	FALSE
CIC	SRSF9	12	q24.31	0.0737818	0.0468905	0.256533	FALSE	1878	FALSE	0.306074	FALSE	1141	FALSE
CIC	WDR45	X	p11.23	0.0737778	0.0520479	0.271232	FALSE	1879	FALSE	0.321129	FALSE	1142	FALSE
CIC	APEX1	14	q11.2	0.0737512	0.0469819	0.25668	FALSE	1880	FALSE	0.306211	FALSE	1143	FALSE
CIC	FAM83E	19	q13.33	0.0737456	0.0450617	0.251558	FALSE	1881	FALSE	NA	NA	NA	NA
CIC	ETV3	1	q23.1	0.073725	0.045122	0.251753	FALSE	1882	FALSE	0.301502	FALSE	1144	FALSE
CIC	PCDHA9	5	q31.3	0.0737242	0.0451242	0.251753	FALSE	1883	FALSE	0.301502	FALSE	1145	FALSE
CIC	ZMAT3	3	q26.32	0.0737116	0.0451613	0.251884	FALSE	1884	FALSE	0.301631	FALSE	1146	FALSE
CIC	EIF1	17	q21.2	0.0736927	0.0452164	0.252038	FALSE	1885	FALSE	0.301762	FALSE	1147	FALSE
CIC	MED14	X	p11.4	0.0736821	0.0542646	0.278285	FALSE	1886	FALSE	0.328545	FALSE	1148	FALSE
CIC	SERPINA6	14	q32.13	0.0736814	0.0452494	0.252091	FALSE	1887	FALSE	0.301772	FALSE	1149	FALSE
CIC	B4GALT4	3	q13.32	0.0736801	0.0452534	0.252091	FALSE	1888	FALSE	0.301772	FALSE	1150	FALSE
CIC	COASY	17	q21.2	0.0736277	0.0454069	0.252562	FALSE	1889	FALSE	0.302203	FALSE	1151	FALSE
CIC	SFTA3	14	q13.3	0.0735593	0.0456084	0.253299	FALSE	1890	FALSE	0.302951	FALSE	1152	FALSE
CIC	WDR83OS	19	p13.13	0.0735173	0.0457323	0.253545	FALSE	1891	FALSE	NA	NA	NA	NA
CIC	KISS1R	19	p13.3	0.0734977	0.0457902	0.25377	FALSE	1892	FALSE	NA	NA	NA	NA
CIC	MYH1	17	p13.1	0.0734675	0.0458797	0.25417	FALSE	1893	FALSE	0.303991	FALSE	1153	FALSE
CIC	COLGALT1	19	p13.11	0.073436	0.0459729	0.254256	FALSE	1894	FALSE	NA	NA	NA	NA
CIC	PRDM7	16	q24.3	0.0734232	0.0479733	0.259174	FALSE	1895	FALSE	0.308883	FALSE	1154	FALSE
CIC	ZNF223	19	q13.31	0.0734217	0.0460156	0.254256	FALSE	1896	FALSE	NA	NA	NA	NA
CIC	ATAT1	6	p21.33	0.0734096	0.0460515	0.254373	FALSE	1897	FALSE	0.30423	FALSE	1155	FALSE
CIC	ARL3	10	q24.32	0.0733956	0.0460932	0.254449	FALSE	1898	FALSE	0.304269	FALSE	1156	FALSE
CIC	PRKD1	14	q12	0.0733755	0.0481192	0.259767	FALSE	1899	FALSE	0.309565	FALSE	1157	FALSE
CIC	SNRPD1	18	q11.2	0.0733718	0.0461639	0.254763	FALSE	1900	FALSE	0.304617	FALSE	1158	FALSE
CIC	IQCC	1	p35.2	0.0733344	0.0462755	0.255149	FALSE	1901	FALSE	0.304679	FALSE	1159	FALSE
CIC	CST9	20	p11.21	0.0732998	0.0463789	0.255291	FALSE	1902	FALSE	0.304679	FALSE	1160	FALSE
CIC	FMN2	1	q43	0.073297	0.0463871	0.255291	FALSE	1903	FALSE	0.304679	FALSE	1161	FALSE
CIC	TIMMDC1	3	q13.33	0.0732939	0.0463963	0.255291	FALSE	1904	FALSE	0.304679	FALSE	1162	FALSE
CIC	HBG1	11	p15.4	0.0732856	0.0464213	0.255291	FALSE	1905	FALSE	0.304679	FALSE	1163	FALSE
CIC	ZNF654	3	p11.1	0.0732779	0.0464444	0.255291	FALSE	1906	FALSE	0.304679	FALSE	1164	FALSE
CIC	BORA	13	q21.33	0.0732759	0.0464504	0.255291	FALSE	1907	FALSE	0.304679	FALSE	1165	FALSE
CIC	PCDHGB5	5	q31.3	0.0732686	0.0464721	0.255291	FALSE	1908	FALSE	0.304679	FALSE	1166	FALSE
CIC	BAK1	6	p21.31	0.0732652	0.0464824	0.255291	FALSE	1909	FALSE	0.304679	FALSE	1167	FALSE
CIC	RBM23	14	q11.2	0.0732414	0.0465536	0.255344	FALSE	1910	FALSE	0.304679	FALSE	1168	FALSE
CIC	LYSMD2	15	q21.2	0.0732361	0.0465697	0.255344	FALSE	1911	FALSE	0.304679	FALSE	1169	FALSE
CIC	HOXD8	2	q31.1	0.0732343	0.0465749	0.255344	FALSE	1912	FALSE	0.304679	FALSE	1170	FALSE
CIC	UNC13C	15	q21.3	0.0732248	0.0466034	0.255344	FALSE	1913	FALSE	0.304679	FALSE	1171	FALSE
CIC	NANOS3	19	p13.12	0.0731831	0.0467289	0.255878	FALSE	1914	FALSE	NA	NA	NA	NA
CIC	SMG6	17	p13.3	0.0731702	0.0467678	0.256015	FALSE	1915	FALSE	0.305518	FALSE	1172	FALSE
CIC	VCP	9	p13.3	0.0731608	0.0467959	0.256092	FALSE	1916	FALSE	0.305584	FALSE	1173	FALSE
CIC	ZNF570	19	q13.12	0.0730967	0.0469895	0.25668	FALSE	1917	FALSE	NA	NA	NA	NA
CIC	KIAA1549L	11	p13	0.0730928	0.0470012	0.25668	FALSE	1918	FALSE	0.30622	FALSE	1174	FALSE
CIC	RSPH9	6	p21.1	0.0730545	0.0471173	0.256927	FALSE	1919	FALSE	0.306254	FALSE	1175	FALSE
CIC	CLDND1	3	q11.2	0.0730358	0.0471739	0.256927	FALSE	1920	FALSE	0.306254	FALSE	1176	FALSE
CIC	BANP	16	q24.2	0.0730354	0.0491682	0.262646	FALSE	1921	FALSE	0.312523	FALSE	1177	FALSE
CIC	PACSIN2	22	q13.2	0.0730196	0.0472231	0.256959	FALSE	1922	FALSE	0.306332	FALSE	1178	FALSE
CIC	KLK15	19	q13.33	0.0730194	0.0472236	0.256959	FALSE	1923	FALSE	NA	NA	NA	NA
CIC	ZBTB7B	1	q21.3	0.0730158	0.0472347	0.256959	FALSE	1924	FALSE	0.306332	FALSE	1179	FALSE
CIC	TADA2B	4	p16.1	0.073005	0.0492627	0.262676	FALSE	1925	FALSE	0.312523	FALSE	1180	FALSE
CIC	KCNK5	6	p21.2	0.0730049	0.0472676	0.257008	FALSE	1926	FALSE	0.306351	FALSE	1181	FALSE
CIC	MAP2K7	19	p13.2	0.0729937	0.0473016	0.257008	FALSE	1927	FALSE	NA	NA	NA	NA
CIC	IGLON5	19	q13.41	0.0729864	0.047324	0.257008	FALSE	1928	FALSE	NA	NA	NA	NA
CIC	CRY1	12	q23.3	0.0729778	0.0473501	0.257019	FALSE	1929	FALSE	0.306351	FALSE	1182	FALSE
CIC	FKBP15	9	q32	0.0729707	0.0473717	0.257019	FALSE	1930	FALSE	0.306351	FALSE	1183	FALSE
CIC	CCM2	7	p13	0.072962	0.0473981	0.257019	FALSE	1931	FALSE	0.306351	FALSE	1184	FALSE
CIC	HDGFL2	19	p13.3	0.0729307	0.049495	0.263293	FALSE	1932	FALSE	NA	NA	NA	NA
CIC	SRSF1	17	q22	0.072924	0.049516	0.263293	FALSE	1933	FALSE	0.313056	FALSE	1185	FALSE
CIC	ATP6V1A	3	q13.31	0.0729219	0.0475203	0.257596	FALSE	1934	FALSE	0.307012	FALSE	1186	FALSE
CIC	PTGES2	9	q34.11	0.0728615	0.0477052	0.258522	FALSE	1935	FALSE	0.30809	FALSE	1187	FALSE
CIC	FAM9A	X	p22.31	0.0728534	0.055069	0.280596	FALSE	1936	FALSE	0.330701	FALSE	1188	FALSE
CIC	C10orf120	10	q26.13	0.0728431	0.0477613	0.258749	FALSE	1937	FALSE	0.308299	FALSE	1189	FALSE
CIC	KIAA1549	7	q34	0.0728331	0.0477919	0.258762	FALSE	1938	FALSE	0.308299	FALSE	1190	FALSE
CIC	HTR2C	X	q23	0.0728137	0.0552019	0.280738	FALSE	1939	FALSE	0.330758	FALSE	1191	FALSE
CIC	TOPBP1	3	q22.1	0.0728	0.0478935	0.259034	FALSE	1940	FALSE	0.308519	FALSE	1192	FALSE
CIC	GZMM	19	p13.3	0.0727784	0.04796	0.259174	FALSE	1941	FALSE	NA	NA	NA	NA
CIC	NUP62	19	q13.33	0.0727719	0.04798	0.259174	FALSE	1942	FALSE	NA	NA	NA	NA
CIC	BCKDHA	19	q13.2	0.0727173	0.0481484	0.259772	FALSE	1943	FALSE	NA	NA	NA	NA
CIC	ORM2	9	q32	0.0727077	0.0481779	0.259781	FALSE	1944	FALSE	0.309565	FALSE	1193	FALSE
CIC	MYL12A	18	p11.31	0.072706	0.048183	0.259781	FALSE	1945	FALSE	0.309565	FALSE	1194	FALSE
CIC	STMN3	20	q13.33	0.0726984	0.0482065	0.259781	FALSE	1946	FALSE	0.309565	FALSE	1195	FALSE
CIC	CHSY3	5	q23.3	0.0726983	0.0482068	0.259781	FALSE	1947	FALSE	0.309565	FALSE	1196	FALSE
CIC	NUP160	11	p11.2	0.072679	0.0482665	0.259915	FALSE	1948	FALSE	0.309602	FALSE	1197	FALSE
CIC	PI4KA	22	q11.21	0.0726683	0.0482997	0.259915	FALSE	1949	FALSE	0.309602	FALSE	1198	FALSE
CIC	OR4S1	11	p11.2	0.0726611	0.048322	0.259915	FALSE	1950	FALSE	0.309604	FALSE	1199	FALSE
CIC	SIGLEC6	19	q13.41	0.0726548	0.0483416	0.259915	FALSE	1951	FALSE	NA	NA	NA	NA
CIC	BICRAL	6	p21.1	0.0726536	0.048345	0.259915	FALSE	1952	FALSE	0.309634	FALSE	1200	FALSE
CIC	IZUMO1	19	q13.33	0.0726293	0.0484205	0.260092	FALSE	1953	FALSE	NA	NA	NA	NA
CIC	NME2	17	q21.33	0.0725406	0.0486961	0.261113	FALSE	1954	FALSE	0.310945	FALSE	1201	FALSE
CIC	GFPT2	5	q35.3	0.0724658	0.0509681	0.268043	FALSE	1955	FALSE	0.317812	FALSE	1202	FALSE
CIC	GORASP2	2	q31.1	0.0724595	0.0489492	0.261954	FALSE	1956	FALSE	0.311766	FALSE	1203	FALSE
CIC	ATP5MPL	NA	NA	0.0724583	0.048953	0.261954	FALSE	1957	FALSE	0.311766	FALSE	1204	FALSE
CIC	MKNK2	19	p13.3	0.0724467	0.0489893	0.262033	FALSE	1958	FALSE	NA	NA	NA	NA
CIC	NAGS	17	q21.31	0.0724445	0.0489963	0.262033	FALSE	1959	FALSE	0.311925	FALSE	1205	FALSE
CIC	MEIS2	15	q14	0.0724373	0.0490186	0.262076	FALSE	1960	FALSE	0.311948	FALSE	1206	FALSE
CIC	NOL3	16	q22.1	0.0724316	0.0490367	0.262096	FALSE	1961	FALSE	0.311948	FALSE	1207	FALSE
CIC	REXO1	19	p13.3	0.0723771	0.0492075	0.262676	FALSE	1962	FALSE	NA	NA	NA	NA
CIC	ZNF831	20	q13.32	0.0723642	0.0492482	0.262676	FALSE	1963	FALSE	0.312523	FALSE	1208	FALSE
CIC	PSMD13	11	p15.5	0.072356	0.0492741	0.262676	FALSE	1964	FALSE	0.312523	FALSE	1209	FALSE
CIC	RAB9A	X	p22.2	0.0722895	0.0569828	0.2852	FALSE	1965	FALSE	0.335021	FALSE	1210	FALSE
CIC	CNTNAP3B	9	p11.2	0.0722782	0.0495192	0.263293	FALSE	1966	FALSE	0.313056	FALSE	1211	FALSE
CIC	VGLL4	3	p25.2	0.0722666	0.0495558	0.263307	FALSE	1967	FALSE	0.313056	FALSE	1212	FALSE
CIC	ATP6V1G1	9	q32	0.0722626	0.0495684	0.263307	FALSE	1968	FALSE	0.313056	FALSE	1213	FALSE
CIC	GIMAP4	7	q36.1	0.0721028	0.050076	0.265024	FALSE	1969	FALSE	0.31479	FALSE	1214	FALSE
CIC	GPR35	2	q37.3	0.0720582	0.0502181	0.265548	FALSE	1970	FALSE	0.315287	FALSE	1215	FALSE
CIC	STKLD1	9	q34.2	0.0720547	0.0502294	0.265548	FALSE	1971	FALSE	0.315287	FALSE	1216	FALSE
CIC	PLPP6	9	p24.1	0.0720536	0.0502329	0.265548	FALSE	1972	FALSE	0.315287	FALSE	1217	FALSE
CIC	PHOSPHO2	2	q31.1	0.0720432	0.0502663	0.265571	FALSE	1973	FALSE	0.315287	FALSE	1218	FALSE
CIC	DDX25	11	q24.2	0.0720347	0.0502934	0.265638	FALSE	1974	FALSE	0.31534	FALSE	1219	FALSE
CIC	VAMP7	X	q28	0.0720116	0.0579457	0.287281	FALSE	1975	FALSE	0.336821	FALSE	1220	FALSE
CIC	PROSER2	10	p14	0.0719894	0.0504386	0.266328	FALSE	1976	FALSE	0.316134	FALSE	1221	FALSE
CIC	OR1N2	9	q33.2	0.0719664	0.0505124	0.266487	FALSE	1977	FALSE	0.316247	FALSE	1222	FALSE
CIC	LUZP2	11	p14.3	0.0719225	0.0506535	0.266848	FALSE	1978	FALSE	0.316547	FALSE	1223	FALSE
CIC	MVB12B	9	q33.3	0.0719074	0.0507024	0.266987	FALSE	1979	FALSE	0.316661	FALSE	1224	FALSE
CIC	SACM1L	3	p21.31	0.0718857	0.0507723	0.267243	FALSE	1980	FALSE	0.31694	FALSE	1225	FALSE
CIC	NKD1	16	q12.1	0.0718744	0.0508088	0.267359	FALSE	1981	FALSE	0.317051	FALSE	1226	FALSE
CIC	POLR3F	20	p11.23	0.0718414	0.0530042	0.274189	FALSE	1982	FALSE	0.324205	FALSE	1227	FALSE
CIC	DDX5	17	q23.3	0.0718291	0.053045	0.274245	FALSE	1983	FALSE	0.324221	FALSE	1228	FALSE
CIC	HECW2	2	q32.3	0.0718107	0.0510145	0.26821	FALSE	1984	FALSE	0.317985	FALSE	1229	FALSE
CIC	S100A1	1	q21.3	0.0717963	0.0510614	0.26838	FALSE	1985	FALSE	0.318141	FALSE	1230	FALSE
CIC	TACR3	4	q24	0.0717804	0.0511127	0.268496	FALSE	1986	FALSE	0.318247	FALSE	1231	FALSE
CIC	BTLA	3	q13.2	0.0717593	0.0511812	0.268778	FALSE	1987	FALSE	0.318556	FALSE	1232	FALSE
CIC	LIM2	19	q13.41	0.0717215	0.0513042	0.269347	FALSE	1988	FALSE	NA	NA	NA	NA
CIC	PSG4	19	q13.31	0.0716509	0.0515342	0.270091	FALSE	1989	FALSE	NA	NA	NA	NA
CIC	EIF2AK1	7	p22.1	0.0716028	0.0516916	0.270606	FALSE	1990	FALSE	0.320677	FALSE	1233	FALSE
CIC	CYP4F2	19	p13.12	0.0715475	0.0518729	0.270929	FALSE	1991	FALSE	NA	NA	NA	NA
CIC	PLEKHA3	2	q31.2	0.0715094	0.0519982	0.271204	FALSE	1992	FALSE	0.321129	FALSE	1234	FALSE
CIC	ABCD4	14	q24.3	0.0715005	0.0520274	0.271232	FALSE	1993	FALSE	0.321129	FALSE	1235	FALSE
CIC	HAS1	19	q13.41	0.0714624	0.0521531	0.271626	FALSE	1994	FALSE	NA	NA	NA	NA
CIC	LRPPRC	2	p21	0.0714224	0.052285	0.272158	FALSE	1995	FALSE	0.322241	FALSE	1236	FALSE
CIC	REC8	14	q12	0.0714151	0.0523092	0.272207	FALSE	1996	FALSE	0.322273	FALSE	1237	FALSE
CIC	PABPN1L	16	q24.3	0.0713851	0.0524085	0.272569	FALSE	1997	FALSE	0.322651	FALSE	1238	FALSE
CIC	OTOP1	4	p16.3	0.0713645	0.0524769	0.272711	FALSE	1998	FALSE	0.322743	FALSE	1239	FALSE
[truncated: 16,335 more rows]

## Sheet: S1b (co-expression)
Supplemental Table S1: Co-essentiality between CIC and other genes profiled in DepMap's CRISPR-Cas9 KO screens. b. Co-expression z-scores derived from COXPRESdb’s human illumina-based RNA-seq data sets (see Methods section for more detail).
Rank	Gene	Function	Entrez Gene ID	hsa-r.6 / CIC
1	KMT2B	lysine methyltransferase 2B	9757	13.1
2	SAMD4B	sterile alpha motif domain containing 4B	55095	9.9
3	ERF	ETS2 repressor factor	2077	9.6
4	MBD6	methyl-CpG binding domain protein 6	114785	9.2
5	PRR12	proline rich 12	57479	8.7
6	SCAF1	SR-related CTD associated factor 1	58506	8.1
7	PCNX3	pecanex 3	399909	8
8	ZNF865	zinc finger protein 865	100507290	7.8
9	REXO1	RNA exonuclease 1 homolog	57455	7.7
10	SETD1A	SET domain containing 1A: histone lysine methyltransferase	9739	7.6
11	PRRC2A	proline rich coiled-coil 2A	7916	7.5
12	ATN1	atrophin 1	1822	7.3
13	SRCAP	Snf2 related CREBBP activator protein	10847	7.2
14	MGRN1	mahogunin ring finger 1	23295	7.1
15	RAI1	retinoic acid induced 1	10743	7.1
16	PTPN23	protein tyrosine phosphatase non-receptor type 23	25930	7.1
17	PIP5K1C	phosphatidylinositol-4-phosphate 5-kinase type 1 gamma	23396	7
18	CRTC1	CREB regulated transcription coactivator 1	23373	7
19	BICRA	BRD4 interacting chromatin remodeling complex associated protein	29998	7
20	FBRS	fibrosin	64319	7
21	HCFC1	host cell factor C1	3054	6.9
22	CNOT3	CCR4-NOT transcription complex subunit 3	4849	6.9
23	PLEKHG2	pleckstrin homology and RhoGEF domain containing G2	64857	6.9
24	TNRC18	trinucleotide repeat containing 18	84629	6.8
25	ATXN2L	ataxin 2 like	11273	6.8
26	AKT2	AKT serine/threonine kinase 2	208	6.8
27	CCDC97	coiled-coil domain containing 97	90324	6.7
28	RFX1	regulatory factor X1	5989	6.7
29	TNK2	tyrosine kinase non receptor 2	10188	6.7
30	ZC3H3	zinc finger CCCH-type containing 3	23144	6.6
31	ZC3H4	zinc finger CCCH-type containing 4	23211	6.6
32	MNT	MAX network transcriptional repressor	4335	6.6
33	SP2	Sp2 transcription factor	6668	6.6
34	ATG2A	autophagy related 2A	23130	6.5
35	DENND4B	DENN domain containing 4B	9909	6.5
36	FBRSL1	fibrosin like 1	57666	6.5
37	AHDC1	AT-hook DNA binding motif containing 1	27245	6.3
38	MED15	mediator complex subunit 15	51586	6.2
39	HNRNPUL1	heterogeneous nuclear ribonucleoprotein U like 1	11100	6.2
40	ZNF335	zinc finger protein 335	63925	6.2
41	INTS1	integrator complex subunit 1	26173	6.2
42	TBC1D17	TBC1 domain family member 17	79735	6.2
43	ZNF628	zinc finger protein 628	89887	6.1
44	HDAC7	histone deacetylase 7	51564	6.1
45	SETD1B	SET domain containing 1B: histone lysine methyltransferase	23067	6.1
46	NCKAP5L	NCK associated protein 5 like	57701	6.1
47	PROSER3	proline and serine rich 3	148137	6
48	KMT2D	lysine methyltransferase 2D	8085	5.9
49	NFIC	nuclear factor I C	4782	5.9
50	WIZ	WIZ zinc finger	58525	5.9
