# Supplementary material for: Multi-Omic Analysis of CIC’s Functional Networks Reveals Novel Interaction Partners and a Potential Role in Mitotic Fidelity
Source: Cancers (Basel). 2023 May 17;15(10):2805. doi: 10.3390/cancers15102805 (PMC10216487; doi:10.3390/cancers15102805)
Supplement: Supplementary file 1 [file cancers-15-02805-s001.zip › Supplemental_Table_S2_DepMap_cell_lines.xlsx]

## Sheet: S2a (CIC mutations)
Supplemental Table S2: CIC mutation characteristics inDepMap 20Q1 cancer cell lines. a Annotations from the DepMap 20Q1 mutations dataset (CCLE_mutations.csv file) for all CIC mutations identified across cancer cell lines. Details about the annotations can be found in Ghandi et al. (2019). The “CIC isoform” column indicates whether a mutation is in a region specific to either the CIC-L or CIC-S i…
Groups	DepMap ID	Cell line name	disease	Hugo symbol	NCBI build	Chromosome	Start position	End position	Strand	Variant classification	Variant type	Reference allele	Tumor allele1	Genome change	cDNA change	Codon change	Protein change	Deleterious	Variant annotation	Allele count (Alt_Ref)	Allele count ref. is null	Zygosity	CIC isoform
CIC-HomDel	ACH-000840	HCC366	Lung Cancer	CIC	37	19	42795301	42795301	+	Nonsense_Mutation	SNP	C	G	g.chr19:42795301C>G	c.5108C>G	c.(5107-5109)tCa>tGa	p.S1703*	TRUE	damaging	28_0	TRUE	Homozygous	both
CIC-HomDel	ACH-000928	JHUEM1	Endometrial/Uterine Cancer	CIC	37	19	42775993	42775994	+	Frame_Shift_Ins	INS	-	C	g.chr19:42775993_42775994insC	c.58_59insC	c.(58-60)tccfs	p.S20fs	TRUE	damaging	6_12	FALSE	Heterozygous	CIC-L
CIC-HomDel	ACH-000928	JHUEM1	Endometrial/Uterine Cancer	CIC	37	19	42775994	42775994	+	Frame_Shift_Del	DEL	C	-	g.chr19:42775994delC	c.59delC	c.(58-60)tccfs	p.S20fs	TRUE	damaging	85_0	TRUE	Homozygous	CIC-L
CIC-HomDel	ACH-000928	JHUEM1	Endometrial/Uterine Cancer	CIC	37	19	42775994	42775995	+	Frame_Shift_Ins	INS	-	C	g.chr19:42775994_42775995insC	c.59_60insC	c.(58-63)tcccccfs	p.SP20fs	TRUE	damaging	85_0	TRUE	Homozygous	CIC-L
CIC-T-HetDel	ACH-000960	REH	Leukemia	CIC	37	19	42776485	42776485	+	Missense_Mutation	SNP	G	T	g.chr19:42776485G>T	c.550G>T	c.(550-552)Ggt>Tgt	p.G184C	FALSE	other non-conserving	8_17	FALSE	Heterozygous	CIC-L
CIC-T-HetDel	ACH-000960	REH	Leukemia	CIC	37	19	42795269	42795269	+	Frame_Shift_Del	DEL	G	-	g.chr19:42795269delG	c.2349delG	c.(2347-2349)cagfs	p.Q783fs	TRUE	damaging	29_51	FALSE	Heterozygous	both
CIC-T-HetDel	ACH-000960	REH	Leukemia	CIC	37	19	42798164	42798164	+	Frame_Shift_Del	DEL	C	-	g.chr19:42798164delC	c.6836delC	c.(6835-6837)tccfs	p.S2279fs	TRUE	damaging	26_43	FALSE	Heterozygous	both
CIC-T-HetDel	ACH-000960	REH	Leukemia	CIC	37	19	42798428	42798428	+	Frame_Shift_Del	DEL	G	-	g.chr19:42798428delG	c.4299delG	c.(4297-4299)gagfs	p.E1433fs	TRUE	damaging	30_48	FALSE	Heterozygous	both
CIC-T-HetDel	ACH-000963	CCK81	Colon/Colorectal Cancer	CIC	37	19	42776955	42776955	+	Frame_Shift_Del	DEL	C	-	g.chr19:42776955delC	c.1020delC	c.(1018-1020)cgcfs	p.R340fs	TRUE	damaging	4_2	FALSE	Heterozygous	CIC-L
CIC-T-HetDel	ACH-000963	CCK81	Colon/Colorectal Cancer	CIC	37	19	42797972	42797972	+	Missense_Mutation	SNP	T	G	g.chr19:42797972T>G	c.4024T>G	c.(4024-4026)Ttt>Gtt	p.F1342V	FALSE	other non-conserving	24_68	FALSE	Heterozygous	both
CIC-T-HetDel	ACH-000963	CCK81	Colon/Colorectal Cancer	CIC	37	19	42799098	42799098	+	Frame_Shift_Del	DEL	C	-	g.chr19:42799098delC	c.7300delC	c.(7300-7302)cccfs	p.P2435fs	TRUE	damaging	31_45	FALSE	Heterozygous	both
CIC-T-HetDel	ACH-000963	CCK81	Colon/Colorectal Cancer	CIC	37	19	42799235	42799235	+	Silent	SNP	G	A	g.chr19:42799235G>A	c.4719G>A	c.(4717-4719)ccG>ccA	p.P1573P	FALSE	silent	4_2	FALSE	Heterozygous	both
CIC-T-HetDel	ACH-000984	HEC6	Endometrial/Uterine Cancer	CIC	37	19	42777750	42777750	+	Silent	SNP	G	A	g.chr19:42777750G>A	c.1815G>A	c.(1813-1815)tcG>tcA	p.S605S	FALSE	silent	44_55	FALSE	Heterozygous	CIC-L
CIC-T-HetDel	ACH-000984	HEC6	Endometrial/Uterine Cancer	CIC	37	19	42791229	42791229	+	Frame_Shift_Del	DEL	C	-	g.chr19:42791229delC	c.3016delC	c.(3016-3018)cccfs	p.P1007fs	TRUE	damaging	19_45	FALSE	Heterozygous	both
CIC-T-HetDel	ACH-000984	HEC6	Endometrial/Uterine Cancer	CIC	37	19	42791758	42791758	+	Missense_Mutation	SNP	G	A	g.chr19:42791758G>A	c.3371G>A	c.(3370-3372)cGg>cAg	p.R1124Q	FALSE	other non-conserving	45_22	FALSE	Heterozygous	both
CIC-T-HetDel	ACH-000984	HEC6	Endometrial/Uterine Cancer	CIC	37	19	42794423	42794423	+	Silent	SNP	C	A	g.chr19:42794423C>A	c.4230C>A	c.(4228-4230)tcC>tcA	p.S1410S	FALSE	silent	32_62	FALSE	Heterozygous	both
CIC-T-HetDel	ACH-000984	HEC6	Endometrial/Uterine Cancer	CIC	37	19	42796484	42796484	+	Missense_Mutation	SNP	C	T	g.chr19:42796484C>T	c.5768C>T	c.(5767-5769)gCg>gTg	p.A1923V	FALSE	other non-conserving	50_37	FALSE	Heterozygous	both
CIC-T-HetDel	ACH-000984	HEC6	Endometrial/Uterine Cancer	CIC	37	19	42797344	42797344	+	Missense_Mutation	SNP	C	T	g.chr19:42797344C>T	c.6427C>T	c.(6427-6429)Cca>Tca	p.P2143S	FALSE	other non-conserving	4_2	FALSE	Heterozygous	both
CIC-T-HetDel	ACH-000984	HEC6	Endometrial/Uterine Cancer	CIC	37	19	42798426	42798426	+	Missense_Mutation	SNP	G	A	g.chr19:42798426G>A	c.7015G>A	c.(7015-7017)Gag>Aag	p.E2339K	FALSE	other non-conserving	17_39	FALSE	Heterozygous	both
CIC-T-HetDel	ACH-000984	HEC6	Endometrial/Uterine Cancer	CIC	37	19	42799098	42799098	+	Frame_Shift_Del	DEL	C	-	g.chr19:42799098delC	c.7300delC	c.(7300-7302)cccfs	p.P2435fs	TRUE	damaging	10_29	FALSE	Heterozygous	both
CIC-T-HetDel	ACH-001345	GP5D	Colon/Colorectal Cancer	CIC	37	19	42794627	42794627	+	Frame_Shift_Del	DEL	C	-	g.chr19:42794627delC	c.4434delC	c.(4432-4434)ggcfs	p.G1478fs	TRUE	damaging	90_92	FALSE	Heterozygous	both
CIC-T-HetDel	ACH-001345	GP5D	Colon/Colorectal Cancer	CIC	37	19	42795231	42795231	+	Missense_Mutation	SNP	G	A	g.chr19:42795231G>A	c.5038G>A	c.(5038-5040)Ggg>Agg	p.G1680R	FALSE	other non-conserving	88_94	FALSE	Heterozygous	both
CIC-T-HetDel	ACH-001345	GP5D	Colon/Colorectal Cancer	CIC	37	19	42798164	42798164	+	Frame_Shift_Del	DEL	C	-	g.chr19:42798164delC	c.6836delC	c.(6835-6837)tccfs	p.S2279fs	TRUE	damaging	128_116	FALSE	Heterozygous	both
CIC-T-HetDel	ACH-001650	SISO	Cervical Cancer	CIC	37	19	42794627	42794627	+	Frame_Shift_Del	DEL	C	-	g.chr19:42794627delC	c.4434delC	c.(4432-4434)ggcfs	p.G1478fs	TRUE	damaging	129_104	FALSE	Heterozygous	both
CIC-T-HetDel	ACH-001650	SISO	Cervical Cancer	CIC	37	19	42796882	42796883	+	Frame_Shift_Ins	INS	-	C	g.chr19:42796882_42796883insC	c.6064_6065insC	c.(6064-6066)gccfs	p.A2022fs	TRUE	damaging	81_87	FALSE	Heterozygous	both
CIC-HetDel	ACH-000168	NOMO1	Leukemia	CIC	37	19	42797988	42797988	+	Splice_Site	SNP	A	G	g.chr19:42797988A>G	c.4040A>G	c.(4039-4041)aAc>aGc	p.N1347S	TRUE	damaging	28_27	FALSE	Heterozygous	both
CIC-HetDel	ACH-000232	U251MG	Brain Cancer	CIC	37	19	42799294	42799295	+	Frame_Shift_Ins	INS	-	G	g.chr19:42799294_42799295insG	c.7496_7497insG	c.(7495-7500)cagcccfs	p.P2500fs	TRUE	damaging	4_10	FALSE	Heterozygous	both
CIC-HetDel	ACH-000381	T84	Colon/Colorectal Cancer	CIC	37	19	42791861	42791861	+	Nonsense_Mutation	SNP	C	A	g.chr19:42791861C>A	c.747C>A	c.(745-747)taC>taA	p.Y249*	TRUE	damaging	27_20	FALSE	Heterozygous	both
CIC-HetDel	ACH-000576	KMS27	Myeloma	CIC	37	19	42776897	42776912	+	Frame_Shift_Del	DEL	TGCACCGTGAGCCAGA	-	g.chr19:42776897_42776912delTGCACCGTGAGCCAGA	c.962_977delTGCACCGTGAGCCAGA	c.(961-978)ctgcaccgtgagccagagfs	p.LHREPE321fs	TRUE	damaging	10_30	FALSE	Heterozygous	CIC-L
CIC-HetDel	ACH-000738	GB1	Brain Cancer	CIC	37	19	42795438	42795438	+	Frame_Shift_Del	DEL	C	-	g.chr19:42795438delC	c.2518delC	c.(2518-2520)cctfs	p.P840fs	TRUE	damaging	11_73	FALSE	Heterozygous	both
CIC-HetDel	ACH-000914	HT	Lymphoma	CIC	37	19	42776925	42776925	+	Nonsense_Mutation	SNP	G	A	g.chr19:42776925G>A	c.990G>A	c.(988-990)tgG>tgA	p.W330*	TRUE	damaging	64_60	FALSE	Heterozygous	CIC-L
CIC-HetDel	ACH-000932	SNU1	Gastric Cancer	CIC	37	19	42776502	42776502	+	Silent	SNP	C	A	g.chr19:42776502C>A	c.567C>A	c.(565-567)ccC>ccA	p.P189P	FALSE	silent	20_27	FALSE	Heterozygous	CIC-L
CIC-HetDel	ACH-000932	SNU1	Gastric Cancer	CIC	37	19	42778294	42778294	+	Frame_Shift_Del	DEL	C	-	g.chr19:42778294delC	c.2359delC	c.(2359-2361)cccfs	p.P788fs	TRUE	damaging	24_35	FALSE	Heterozygous	CIC-L
CIC-HetDel	ACH-000932	SNU1	Gastric Cancer	CIC	37	19	42778575	42778575	+	Silent	SNP	C	T	g.chr19:42778575C>T	c.2640C>T	c.(2638-2640)gcC>gcT	p.A880A	FALSE	silent	53_37	FALSE	Heterozygous	CIC-L
CIC-HetDel	ACH-000939	SKUT1	Sarcoma	CIC	37	19	42775994	42775994	+	Frame_Shift_Del	DEL	C	-	g.chr19:42775994delC	c.59delC	c.(58-60)tccfs	p.S20fs	TRUE	damaging	60_44	FALSE	Heterozygous	CIC-L
CIC-HetDel	ACH-000939	SKUT1	Sarcoma	CIC	37	19	42777408	42777408	+	Silent	SNP	C	T	g.chr19:42777408C>T	c.1473C>T	c.(1471-1473)agC>agT	p.S491S	FALSE	silent	30_50	FALSE	Heterozygous	CIC-L
CIC-HetDel	ACH-000939	SKUT1	Sarcoma	CIC	37	19	42799219	42799219	+	Missense_Mutation	SNP	C	T	g.chr19:42799219C>T	c.4703C>T	c.(4702-4704)aCg>aTg	p.T1568M	FALSE	other non-conserving	36_50	FALSE	Heterozygous	both
CIC-HetDel	ACH-000948	2313287	Gastric Cancer	CIC	37	19	42794441	42794441	+	Frame_Shift_Del	DEL	C	-	g.chr19:42794441delC	c.1521delC	c.(1519-1521)cgcfs	p.R507fs	TRUE	damaging	29_46	FALSE	Heterozygous	both
CIC-HetDel	ACH-000948	2313287	Gastric Cancer	CIC	37	19	42797233	42797233	+	Missense_Mutation	SNP	C	T	g.chr19:42797233C>T	c.3595C>T	c.(3595-3597)Cgg>Tgg	p.R1199W	FALSE	other non-conserving	7_5	FALSE	Heterozygous	both
CIC-HetDel	ACH-000953	SUPT1	Leukemia	CIC	37	19	42777916	42777916	+	Missense_Mutation	SNP	C	T	g.chr19:42777916C>T	c.1981C>T	c.(1981-1983)Cgc>Tgc	p.R661C	FALSE	other non-conserving	25_40	FALSE	Heterozygous	CIC-L
CIC-HetDel	ACH-000953	SUPT1	Leukemia	CIC	37	19	42778484	42778484	+	Missense_Mutation	SNP	C	T	g.chr19:42778484C>T	c.2549C>T	c.(2548-2550)cCt>cTt	p.P850L	FALSE	other non-conserving	11_55	FALSE	Heterozygous	CIC-L
CIC-HetDel	ACH-000953	SUPT1	Leukemia	CIC	37	19	42791545	42791546	+	Frame_Shift_Ins	INS	-	C	g.chr19:42791545_42791546insC	c.526_527insC	c.(526-528)gccfs	p.A176fs	TRUE	damaging	22_44	FALSE	Heterozygous	both
CIC-HetDel	ACH-000959	SNUC4	Colon/Colorectal Cancer	CIC	37	19	42790922	42790922	+	Splice_Site	SNP	G	A	g.chr19:42790922G>A	NA	c.e2-1	NA	TRUE	damaging	11_12	FALSE	Heterozygous	both
CIC-HetDel	ACH-000959	SNUC4	Colon/Colorectal Cancer	CIC	37	19	42794440	42794440	+	Missense_Mutation	SNP	G	A	g.chr19:42794440G>A	c.4247G>A	c.(4246-4248)cGc>cAc	p.R1416H	FALSE	other non-conserving	40_46	FALSE	Heterozygous	both
CIC-HetDel	ACH-000969	KM12	Colon/Colorectal Cancer	CIC	37	19	42777936	42777936	+	Silent	SNP	C	T	g.chr19:42777936C>T	c.2001C>T	c.(1999-2001)acC>acT	p.T667T	FALSE	silent	27_28	FALSE	Heterozygous	CIC-L
CIC-HetDel	ACH-000969	KM12	Colon/Colorectal Cancer	CIC	37	19	42778126	42778126	+	Frame_Shift_Del	DEL	G	-	g.chr19:42778126delG	c.2191delG	c.(2191-2193)gggfs	p.G734fs	TRUE	damaging	8_20	FALSE	Heterozygous	CIC-L
CIC-HetDel	ACH-000969	KM12	Colon/Colorectal Cancer	CIC	37	19	42778456	42778456	+	Missense_Mutation	SNP	C	T	g.chr19:42778456C>T	c.2521C>T	c.(2521-2523)Cgg>Tgg	p.R841W	FALSE	other non-conserving	8_11	FALSE	Heterozygous	CIC-L
CIC-HetDel	ACH-000978	EN	Endometrial/Uterine Cancer	CIC	37	19	42777941	42777941	+	Missense_Mutation	SNP	A	G	g.chr19:42777941A>G	c.2006A>G	c.(2005-2007)aAg>aGg	p.K669R	FALSE	other non-conserving	17_33	FALSE	Heterozygous	CIC-L
CIC-HetDel	ACH-000978	EN	Endometrial/Uterine Cancer	CIC	37	19	42777991	42777992	+	Frame_Shift_Ins	INS	-	C	g.chr19:42777991_42777992insC	c.2056_2057insC	c.(2056-2058)gccfs	p.A686fs	TRUE	damaging	10_30	FALSE	Heterozygous	CIC-L
CIC-HetDel	ACH-000978	EN	Endometrial/Uterine Cancer	CIC	37	19	42796857	42796857	+	Silent	SNP	A	G	g.chr19:42796857A>G	c.3315A>G	c.(3313-3315)tcA>tcG	p.S1105S	FALSE	silent	14_7	FALSE	Heterozygous	both

## Sheet: S2b (CIC copy number)
Supplemental Table S2: CIC mutation characteristics inDepMap 20Q1 cancer cell lines. b CIC mutant and control group cell line CIC copy number status. (see Methods section for mutant group selection criteria).
DepMap ID	Groups	CIC relative copy number
ACH-000840	CIC-HomDel	1.13324
ACH-000928	CIC-HomDel	1.02415
ACH-000960	CIC-T-HetDel	0.995806
ACH-000963	CIC-T-HetDel	1.0576
ACH-000984	CIC-T-HetDel	0.904917
ACH-001345	CIC-T-HetDel	1.00573
ACH-001650	CIC-T-HetDel	0.998863
ACH-000015	CIC-HetDel	0.708239
ACH-000092	CIC-HetDel	0.65789
ACH-000118	CIC-HetDel	0.657606
ACH-000132	CIC-HetDel	0.688446
ACH-000152	CIC-HetDel	0.609904
ACH-000168	CIC-HetDel	0.996147
ACH-000182	CIC-HetDel	0.668095
ACH-000227	CIC-HetDel	0.627764
ACH-000232	CIC-HetDel	1.04485
ACH-000256	CIC-HetDel	0.649012
ACH-000262	CIC-HetDel	0.713671
ACH-000278	CIC-HetDel	0.70244
ACH-000279	CIC-HetDel	0.677039
ACH-000293	CIC-HetDel	0.46309
ACH-000294	CIC-HetDel	0.706305
ACH-000332	CIC-HetDel	0.730632
ACH-000381	CIC-HetDel	0.77625
ACH-000397	CIC-HetDel	0.707721
ACH-000408	CIC-HetDel	0.738355
ACH-000470	CIC-HetDel	0.70425
ACH-000500	CIC-HetDel	0.512216
ACH-000502	CIC-HetDel	0.684775
ACH-000549	CIC-HetDel	0.707054
ACH-000573	CIC-HetDel	0.74472
ACH-000576	CIC-HetDel	0.970593
ACH-000587	CIC-HetDel	0.425021
ACH-000621	CIC-HetDel	0.506529
ACH-000624	CIC-HetDel	0.568345
ACH-000694	CIC-HetDel	0.706222
ACH-000724	CIC-HetDel	0.714642
ACH-000738	CIC-HetDel	0.95048
ACH-000817	CIC-HetDel	0.739826
ACH-000841	CIC-HetDel	0.488591
ACH-000847	CIC-HetDel	0.736905
ACH-000901	CIC-HetDel	0.745791
ACH-000914	CIC-HetDel	1.00287
ACH-000916	CIC-HetDel	0.678808
ACH-000932	CIC-HetDel	0.991894
ACH-000939	CIC-HetDel	0.999544
ACH-000948	CIC-HetDel	0.988574
ACH-000953	CIC-HetDel	1.00421
ACH-000959	CIC-HetDel	1.00212
ACH-000969	CIC-HetDel	0.993037
ACH-000978	CIC-HetDel	1.02069
ACH-001302	CIC-HetDel	0.648693
ACH-001340	CIC-HetDel	0.670094
ACH-001356	CIC-HetDel	0.580233
ACH-001412	CIC-HetDel	0.692543
ACH-001458	CIC-HetDel	0.748499
ACH-001496	CIC-HetDel	0.688923
ACH-001500	CIC-HetDel	0.661438
ACH-001521	CIC-HetDel	0.745201
ACH-001526	CIC-HetDel	0.720334
ACH-000004	Control	1.20564
ACH-000005	Control	1.0897
ACH-000007	Control	0.980042
ACH-000009	Control	0.983392
ACH-000011	Control	1.07133
ACH-000012	Control	0.778402
ACH-000013	Control	0.788903
ACH-000014	Control	1.03553
ACH-000017	Control	1.09787
ACH-000018	Control	0.86881
ACH-000019	Control	1.05328
ACH-000021	Control	1.01854
ACH-000022	Control	0.761598
ACH-000024	Control	1.1502
ACH-000025	Control	0.995108
ACH-000028	Control	0.992022
ACH-000029	Control	0.850444
ACH-000036	Control	1.06072
ACH-000037	Control	1.10206
ACH-000039	Control	1.02803
ACH-000040	Control	1.03379
ACH-000041	Control	0.769317
ACH-000042	Control	0.986885
ACH-000048	Control	0.884436
ACH-000052	Control	0.941174
ACH-000053	Control	0.897554
ACH-000054	Control	0.99894
ACH-000060	Control	0.969765
ACH-000067	Control	0.915115
ACH-000070	Control	1.00978
ACH-000075	Control	0.997898
ACH-000078	Control	0.951339
ACH-000082	Control	0.938171
ACH-000085	Control	0.787206
ACH-000086	Control	0.868183
ACH-000087	Control	0.95957
ACH-000095	Control	0.975797
ACH-000096	Control	0.997909
ACH-000097	Control	1.14394
ACH-000098	Control	0.870543
ACH-000099	Control	1.02425
ACH-000108	Control	0.784087
ACH-000111	Control	1.1232
ACH-000113	Control	1.00083
ACH-000115	Control	1.1643
ACH-000116	Control	1.1466
ACH-000123	Control	1.02344
ACH-000127	Control	1.00851
ACH-000128	Control	1.08655
ACH-000133	Control	1.00193
ACH-000137	Control	0.937411
ACH-000138	Control	0.91164
ACH-000141	Control	1.0169
ACH-000142	Control	1.02983
ACH-000143	Control	1.00945
ACH-000146	Control	0.996418
ACH-000148	Control	1.09656
ACH-000150	Control	1.03658
ACH-000151	Control	0.941936
ACH-000153	Control	0.872137
ACH-000159	Control	1.20648
ACH-000160	Control	0.99206
ACH-000164	Control	0.834885
ACH-000167	Control	0.964547
ACH-000169	Control	0.980784
ACH-000174	Control	1.04782
ACH-000178	Control	0.889913
ACH-000183	Control	0.97091
ACH-000187	Control	0.928564
ACH-000188	Control	0.872788
ACH-000189	Control	1.04684
ACH-000190	Control	0.874981
ACH-000200	Control	0.974159
ACH-000202	Control	0.906982
ACH-000204	Control	0.881036
ACH-000206	Control	0.99318
ACH-000207	Control	0.752339
ACH-000209	Control	1.03205
ACH-000211	Control	1.05807
ACH-000215	Control	0.941056
ACH-000219	Control	1.02356
ACH-000221	Control	1.08501
ACH-000222	Control	0.892119
ACH-000223	Control	1.09015
ACH-000226	Control	0.967711
ACH-000228	Control	0.938542
ACH-000231	Control	1.24671
ACH-000233	Control	0.964407
ACH-000235	Control	0.82967
ACH-000237	Control	1.07711
ACH-000238	Control	0.88928
ACH-000243	Control	1.03474
ACH-000244	Control	1.00224
ACH-000246	Control	0.934031
ACH-000247	Control	0.936948
ACH-000248	Control	0.924799
ACH-000250	Control	1.1478
ACH-000251	Control	0.79151
ACH-000253	Control	1.01428
ACH-000255	Control	0.878191
ACH-000257	Control	1.0103
ACH-000258	Control	0.997452
ACH-000259	Control	0.947726
ACH-000261	Control	0.944718
ACH-000263	Control	1.02197
ACH-000264	Control	1.06066
ACH-000265	Control	0.987345
ACH-000266	Control	0.786206
ACH-000271	Control	0.994231
ACH-000272	Control	1.09791
ACH-000274	Control	0.994826
ACH-000276	Control	1.13546
ACH-000277	Control	1.05427
ACH-000280	Control	1.24011
ACH-000281	Control	0.958136
ACH-000286	Control	0.893485
ACH-000288	Control	1.01979
ACH-000290	Control	1.02288
ACH-000292	Control	0.913627
ACH-000295	Control	1.06824
ACH-000304	Control	1.00923
ACH-000307	Control	1.10592
ACH-000310	Control	0.952605
ACH-000311	Control	1.14268
ACH-000312	Control	1.01648
ACH-000315	Control	0.97834
ACH-000317	Control	1.03308
ACH-000318	Control	0.774062
ACH-000320	Control	1.01461
ACH-000322	Control	1.01918
ACH-000323	Control	1.0044
ACH-000324	Control	1.05513
ACH-000326	Control	1.01537
ACH-000329	Control	0.990939
ACH-000330	Control	0.995571
ACH-000331	Control	0.998016
ACH-000334	Control	1.14688
ACH-000335	Control	0.909364
ACH-000336	Control	0.977314
ACH-000337	Control	0.968233
ACH-000339	Control	0.974945
ACH-000341	Control	0.983119
ACH-000343	Control	0.89323
ACH-000348	Control	1.17608
ACH-000350	Control	0.902564
ACH-000355	Control	1.10485
ACH-000356	Control	1.06479
ACH-000361	Control	1.00333
ACH-000363	Control	1.01276
ACH-000364	Control	0.965731
ACH-000365	Control	0.983983
ACH-000366	Control	0.894207
ACH-000368	Control	1.03431
ACH-000374	Control	1.06243
ACH-000375	Control	1.01403
ACH-000376	Control	1.11781
ACH-000383	Control	0.928347
ACH-000385	Control	0.961466
ACH-000387	Control	1.21614
ACH-000389	Control	0.976169
ACH-000390	Control	0.971512
ACH-000395	Control	1.07044
ACH-000401	Control	0.866989
ACH-000402	Control	0.979588
ACH-000403	Control	1.00496
ACH-000404	Control	0.988249
ACH-000405	Control	1.01151
ACH-000406	Control	1.14413
ACH-000407	Control	1.01646
ACH-000410	Control	0.876848
ACH-000411	Control	1.01516
ACH-000415	Control	1.13319
ACH-000416	Control	1.24236
ACH-000420	Control	1.15651
ACH-000421	Control	1.0462
ACH-000424	Control	0.943722
ACH-000425	Control	1.03786
ACH-000426	Control	1.0373
ACH-000427	Control	1.19864
ACH-000431	Control	1.16941
ACH-000434	Control	0.969346
ACH-000435	Control	1.02488
ACH-000436	Control	0.889855
ACH-000437	Control	0.937855
ACH-000444	Control	1.12114
ACH-000445	Control	0.897649
ACH-000448	Control	1.00992
ACH-000450	Control	1.10222
ACH-000452	Control	1.08904
ACH-000454	Control	0.798323
ACH-000458	Control	0.823736
ACH-000459	Control	1.11079
ACH-000460	Control	1.24471
ACH-000461	Control	1.19765
ACH-000463	Control	0.841419
ACH-000464	Control	1.02628
ACH-000466	Control	0.986664
ACH-000467	Control	1.06583
ACH-000469	Control	1.21712
ACH-000472	Control	0.884766
ACH-000473	Control	0.989918
ACH-000475	Control	1.15388
ACH-000477	Control	0.987413
ACH-000478	Control	0.819732
ACH-000480	Control	1.04964
ACH-000483	Control	1.07328
ACH-000485	Control	0.914136
ACH-000486	Control	0.978415
ACH-000487	Control	1.05588
ACH-000488	Control	0.801643
ACH-000490	Control	1.19564
ACH-000493	Control	0.868326
ACH-000495	Control	0.956155
ACH-000498	Control	1.00765
ACH-000499	Control	0.766289
ACH-000504	Control	1.05397
ACH-000505	Control	0.778578
ACH-000511	Control	0.834405
ACH-000512	Control	1.02683
ACH-000514	Control	0.833771
ACH-000518	Control	0.977332
ACH-000520	Control	1.16936
ACH-000521	Control	0.980843
ACH-000522	Control	1.0786
ACH-000527	Control	1.20098
ACH-000528	Control	1.233
ACH-000537	Control	1.20905
ACH-000541	Control	1.10069
ACH-000542	Control	1.04585
ACH-000547	Control	0.940891
ACH-000548	Control	0.882499
ACH-000550	Control	1.13046
ACH-000552	Control	1.24197
ACH-000556	Control	1.22268
ACH-000557	Control	0.985891
ACH-000563	Control	1.02449
ACH-000570	Control	1.07189
ACH-000571	Control	0.914948
ACH-000577	Control	1.17903
ACH-000579	Control	1.02825
ACH-000580	Control	0.972098
ACH-000583	Control	0.988437
ACH-000584	Control	1.16302
ACH-000585	Control	0.786292
ACH-000588	Control	1.10049
ACH-000589	Control	0.777561
ACH-000591	Control	1.13269
ACH-000592	Control	1.11236
ACH-000593	Control	0.955992
ACH-000596	Control	0.847405
ACH-000600	Control	1.13209
ACH-000601	Control	1.03043
ACH-000604	Control	1.0227
ACH-000605	Control	1.13648
ACH-000606	Control	1.00739
ACH-000608	Control	1.18426
ACH-000614	Control	1.0047
ACH-000616	Control	1.13955
ACH-000618	Control	0.984954
ACH-000619	Control	1.07998
ACH-000622	Control	0.914027
ACH-000623	Control	0.991579
ACH-000627	Control	0.813147
ACH-000630	Control	0.92308
ACH-000632	Control	1.08338
ACH-000633	Control	1.06046
ACH-000637	Control	1.0487
ACH-000638	Control	0.793037
ACH-000647	Control	1.0865
ACH-000648	Control	0.91621
ACH-000651	Control	0.941056
ACH-000652	Control	0.829126
ACH-000653	Control	1.071
ACH-000654	Control	0.988701
ACH-000655	Control	0.884389
ACH-000657	Control	1.0085
ACH-000658	Control	0.966254
ACH-000661	Control	0.900353
ACH-000663	Control	0.912614
ACH-000665	Control	0.838345
ACH-000671	Control	0.852632
ACH-000673	Control	1.04689
ACH-000676	Control	0.985751
ACH-000677	Control	0.928664
ACH-000682	Control	0.938316
ACH-000683	Control	1.11849
ACH-000684	Control	1.07921
ACH-000685	Control	1.189
ACH-000688	Control	1.02249
ACH-000693	Control	1.0674
ACH-000696	Control	0.906791
ACH-000702	Control	1.22168
ACH-000706	Control	1.06525
ACH-000711	Control	1.13043
ACH-000713	Control	1.10638
ACH-000714	Control	1.1321
ACH-000718	Control	1.07553
ACH-000720	Control	0.927086
ACH-000721	Control	0.916136
ACH-000725	Control	0.781263
ACH-000735	Control	0.970478
ACH-000739	Control	0.927944
ACH-000740	Control	1.01365
ACH-000747	Control	0.929191
ACH-000748	Control	0.982574
ACH-000753	Control	0.943486
ACH-000756	Control	1.06446
ACH-000757	Control	0.847956
ACH-000758	Control	0.976609
ACH-000760	Control	1.15687
ACH-000762	Control	0.977519
ACH-000764	Control	1.07201
ACH-000765	Control	0.883849
ACH-000766	Control	0.896391
ACH-000767	Control	1.22514
ACH-000768	Control	1.04617
ACH-000769	Control	0.869286
ACH-000771	Control	1.01009
ACH-000775	Control	0.795402
ACH-000776	Control	1.08524
ACH-000778	Control	0.934649
ACH-000782	Control	1.00245
ACH-000783	Control	1.05227
ACH-000784	Control	0.813993
ACH-000785	Control	1.03815
ACH-000788	Control	0.957316
ACH-000790	Control	0.960899
ACH-000791	Control	0.962035
ACH-000792	Control	0.967981
ACH-000793	Control	1.0863
ACH-000794	Control	0.980785
ACH-000796	Control	0.928134
ACH-000799	Control	1.14573
ACH-000800	Control	1.15617
ACH-000801	Control	0.756022
ACH-000802	Control	0.777543
ACH-000804	Control	0.894461
ACH-000805	Control	0.977557
ACH-000807	Control	0.970085
ACH-000809	Control	1.14893
ACH-000810	Control	0.813931
ACH-000814	Control	0.986288
ACH-000819	Control	0.813907
ACH-000820	Control	0.791752
ACH-000821	Control	1.06944
ACH-000822	Control	1.00866
ACH-000823	Control	1.18614
ACH-000826	Control	0.919382
ACH-000827	Control	0.976612
ACH-000829	Control	1.01805
ACH-000831	Control	0.974444
ACH-000832	Control	0.976361
ACH-000833	Control	0.975788
ACH-000834	Control	1.06632
ACH-000835	Control	0.851716
ACH-000836	Control	0.782589
ACH-000837	Control	0.909341
ACH-000838	Control	1.08589
ACH-000843	Control	0.790035
ACH-000846	Control	0.785143
ACH-000848	Control	0.96216
ACH-000851	Control	0.912354
ACH-000853	Control	0.88947
ACH-000854	Control	1.01195
ACH-000855	Control	0.979241
ACH-000856	Control	1.00334
ACH-000858	Control	0.85074
ACH-000859	Control	1.112
ACH-000862	Control	0.929669
ACH-000866	Control	1.01355
ACH-000869	Control	1.13347
ACH-000876	Control	1.07307
ACH-000878	Control	1.04213
ACH-000881	Control	0.949697
ACH-000882	Control	0.966983
ACH-000885	Control	0.984206
ACH-000887	Control	0.940241
ACH-000888	Control	1.15375
ACH-000890	Control	0.884515
ACH-000896	Control	0.899835
ACH-000898	Control	1.23597
ACH-000899	Control	0.935417
ACH-000905	Control	0.987715
ACH-000906	Control	0.902053
ACH-000911	Control	0.92639
ACH-000913	Control	1.12773
ACH-000915	Control	0.871723
ACH-000917	Control	0.935252
ACH-000926	Control	1.0475
ACH-000929	Control	1.04835
ACH-000935	Control	1.01842
ACH-000936	Control	0.903559
ACH-000943	Control	0.971196
ACH-000950	Control	0.95762
ACH-000958	Control	0.980112
ACH-000968	Control	0.873798
ACH-000973	Control	0.930017
ACH-000975	Control	0.925357
ACH-000976	Control	0.953249
ACH-000986	Control	0.981746
ACH-000993	Control	1.00499
ACH-001001	Control	0.905126
ACH-001020	Control	1.01175
ACH-001028	Control	1.02189
ACH-001031	Control	1.05514
ACH-001038	Control	0.965181
ACH-001048	Control	0.779953
ACH-001050	Control	0.945228
ACH-001053	Control	0.972375
ACH-001054	Control	1.09171
ACH-001061	Control	0.979892
ACH-001067	Control	1.01101
ACH-001075	Control	0.996448
ACH-001096	Control	1.06785
ACH-001129	Control	1.03389
ACH-001134	Control	0.987571
ACH-001151	Control	1.07003
ACH-001163	Control	0.99614
ACH-001173	Control	1.21842
ACH-001183	Control	1.02541
ACH-001184	Control	0.972081
ACH-001192	Control	0.794205
ACH-001193	Control	1.08253
ACH-001196	Control	0.990382
ACH-001197	Control	1.00152
ACH-001205	Control	0.994669
ACH-001211	Control	1.03155
ACH-001212	Control	1.00671
ACH-001228	Control	1.04825
ACH-001232	Control	1.13714
ACH-001239	Control	1.03256
ACH-001274	Control	0.935302
ACH-001275	Control	1.03365
ACH-001277	Control	1.01027
ACH-001280	Control	0.917415
ACH-001283	Control	1.0072
ACH-001289	Control	1.0529
ACH-001295	Control	0.981968
ACH-001300	Control	1.22592
ACH-001301	Control	0.983797
ACH-001303	Control	0.966813
ACH-001306	Control	0.950945
ACH-001318	Control	1.12725
ACH-001322	Control	1.01483
ACH-001328	Control	1.14209
ACH-001329	Control	1.0464
ACH-001332	Control	1.00271
ACH-001333	Control	1.00175
ACH-001336	Control	1.07176
ACH-001344	Control	1.08241
ACH-001346	Control	1.03038
ACH-001353	Control	0.909769
ACH-001354	Control	0.931375
ACH-001366	Control	0.98466
ACH-001368	Control	1.03884
ACH-001374	Control	1.02273
ACH-001377	Control	1.04445
ACH-001380	Control	1.01716
ACH-001382	Control	1.10243
ACH-001390	Control	0.868422
ACH-001391	Control	1.02251
ACH-001394	Control	1.13175
ACH-001396	Control	0.782769
ACH-001402	Control	1.1292
ACH-001403	Control	1.06284
ACH-001407	Control	0.942116
ACH-001408	Control	1.02756
ACH-001409	Control	1.16584
ACH-001411	Control	0.796728
ACH-001413	Control	0.788457
ACH-001414	Control	0.987251
ACH-001430	Control	0.963119
ACH-001431	Control	1.02482
ACH-001433	Control	1.03729
ACH-001450	Control	1.21961
ACH-001454	Control	0.921233
ACH-001459	Control	1.0811
ACH-001460	Control	1.11422
ACH-001461	Control	0.93101
ACH-001484	Control	0.977632
ACH-001485	Control	0.805677
ACH-001494	Control	0.978813
ACH-001495	Control	0.92184
ACH-001509	Control	0.901116
ACH-001515	Control	1.12316
ACH-001520	Control	1.02567
ACH-001522	Control	0.840637
ACH-001523	Control	0.977844
ACH-001524	Control	0.760943
ACH-001529	Control	1.00968
ACH-001530	Control	0.98302
ACH-001532	Control	1.02162
ACH-001548	Control	0.965669
ACH-001550	Control	1.00768
ACH-001551	Control	1.10231
ACH-001552	Control	0.911724
ACH-001554	Control	0.956052
ACH-001555	Control	1.20112
ACH-001559	Control	1.23963
ACH-001563	Control	0.99835
ACH-001566	Control	1.15179
ACH-001567	Control	0.86675
ACH-001568	Control	1.10392
ACH-001570	Control	0.985458
ACH-001607	Control	1.04817
ACH-001608	Control	0.898619
ACH-001610	Control	0.927695
ACH-001611	Control	0.964009
ACH-001618	Control	1.24569
ACH-001622	Control	0.919133
ACH-001624	Control	1.00981
ACH-001628	Control	1.09499
ACH-001645	Control	0.77818
ACH-001647	Control	1.02629
ACH-001651	Control	1.16219
ACH-001654	Control	1.08076
ACH-001664	Control	0.996151
ACH-001673	Control	1.0215
ACH-001677	Control	1.01395
ACH-001685	Control	0.938979
ACH-001715	Control	0.914514
ACH-001736	Control	1.01078
ACH-001737	Control	1.02014
ACH-001740	Control	0.870383
ACH-001745	Control	0.862154
ACH-001750	Control	1.01292
ACH-001765	Control	0.908041
ACH-001790	Control	1.00662
ACH-001791	Control	1.06332
ACH-001793	Control	1.06103
ACH-001796	Control	1.0544
ACH-001799	Control	0.922388
ACH-001814	Control	0.884536
ACH-001836	Control	0.868245
ACH-001841	Control	1.06996
ACH-001843	Control	1.05216
ACH-001848	Control	1.15986
ACH-001849	Control	1.00883
ACH-001856	Control	0.869759
ACH-001857	Control	0.843805
ACH-001955	Control	1.17189
ACH-001957	Control	1.12582
ACH-001959	Control	1.00134
ACH-001960	Control	0.961746
ACH-001997	Control	0.973801
ACH-002001	Control	1.04045
ACH-002003	Control	1.03072
ACH-002004	Control	1.0052
ACH-002005	Control	0.90779
ACH-001279	Control	1.03537
ACH-001802	Control	0.886609
ACH-002015	Control	1.12809
ACH-001510	Control	0.920476
ACH-001619	Control	1.01227
ACH-001858	Control	0.850592
ACH-001864	Control	0.99078
ACH-001653	Control	0.85817

## Sheet: S2c (DepMap cell line groups)
Supplemental Table S2: CIC mutation characteristics inDepMap 20Q1 cancer cell lines. c CIC mutant group status of all DepMap 20Q1 cancer cell lines (see Methods section for mutant group selection criteria).
Groups	DepMap ID	Cell line name	Disease type
CIC-HomDel	ACH-000840	HCC366	Lung Cancer
CIC-HomDel	ACH-000928	JHUEM1	Endometrial/Uterine Cancer
CIC-T-HetDel	ACH-000960	REH	Leukemia
CIC-T-HetDel	ACH-000963	CCK81	Colon/Colorectal Cancer
CIC-T-HetDel	ACH-000984	HEC6	Endometrial/Uterine Cancer
CIC-T-HetDel	ACH-001345	GP5D	Colon/Colorectal Cancer
CIC-T-HetDel	ACH-001650	SISO	Cervical Cancer
CIC-HetDel	ACH-000015	NCIH1581	Lung Cancer
CIC-HetDel	ACH-000092	NCIH2452	Lung Cancer
CIC-HetDel	ACH-000118	HUPT3	Pancreatic Cancer
CIC-HetDel	ACH-000132	JHOS2	Ovarian Cancer
CIC-HetDel	ACH-000152	M059K	Brain Cancer
CIC-HetDel	ACH-000168	NOMO1	Leukemia
CIC-HetDel	ACH-000182	SNU869	Bile Duct Cancer
CIC-HetDel	ACH-000227	KPNYN	Neuroblastoma
CIC-HetDel	ACH-000232	U251MG	Brain Cancer
CIC-HetDel	ACH-000256	COV318	Ovarian Cancer
CIC-HetDel	ACH-000262	UOK101	Kidney Cancer
CIC-HetDel	ACH-000278	COV362	Ovarian Cancer
CIC-HetDel	ACH-000279	EWS502	Bone Cancer
CIC-HetDel	ACH-000293	KLE	Endometrial/Uterine Cancer
CIC-HetDel	ACH-000294	NB4	Leukemia
CIC-HetDel	ACH-000332	YAPC	Pancreatic Cancer
CIC-HetDel	ACH-000381	T84	Colon/Colorectal Cancer
CIC-HetDel	ACH-000397	TEN	Endometrial/Uterine Cancer
CIC-HetDel	ACH-000408	TE5	Esophageal Cancer
CIC-HetDel	ACH-000470	SW1463	Colon/Colorectal Cancer
CIC-HetDel	ACH-000500	SNU46	Head and Neck Cancer
CIC-HetDel	ACH-000502	TCCPAN2	Pancreatic Cancer
CIC-HetDel	ACH-000549	SNU1076	Head and Neck Cancer
CIC-HetDel	ACH-000573	MDAMB436	Breast Cancer
CIC-HetDel	ACH-000576	KMS27	Myeloma
CIC-HetDel	ACH-000587	NCIH1975	Lung Cancer
CIC-HetDel	ACH-000621	MDAMB157	Breast Cancer
CIC-HetDel	ACH-000624	HCC1806	Breast Cancer
CIC-HetDel	ACH-000694	TE9	Esophageal Cancer
CIC-HetDel	ACH-000724	HT1376	Bladder Cancer
CIC-HetDel	ACH-000738	GB1	Brain Cancer
CIC-HetDel	ACH-000817	RPMI8226	Myeloma
CIC-HetDel	ACH-000841	NCIH2087	Lung Cancer
CIC-HetDel	ACH-000847	HGC27	Gastric Cancer
CIC-HetDel	ACH-000901	HCC1359	Lung Cancer
CIC-HetDel	ACH-000914	HT	Lymphoma
CIC-HetDel	ACH-000916	NCIH1573	Lung Cancer
CIC-HetDel	ACH-000932	SNU1	Gastric Cancer
CIC-HetDel	ACH-000939	SKUT1	Sarcoma
CIC-HetDel	ACH-000948	2313287	Gastric Cancer
CIC-HetDel	ACH-000953	SUPT1	Leukemia
CIC-HetDel	ACH-000959	SNUC4	Colon/Colorectal Cancer
CIC-HetDel	ACH-000969	KM12	Colon/Colorectal Cancer
CIC-HetDel	ACH-000978	EN	Endometrial/Uterine Cancer
CIC-HetDel	ACH-001302	COGN305	Neuroblastoma
CIC-HetDel	ACH-001340	COV413A	Ovarian Cancer
CIC-HetDel	ACH-001356	MB1	Thyroid Cancer
CIC-HetDel	ACH-001412	UMUC10	Bladder Cancer
CIC-HetDel	ACH-001458	C75	Colon/Colorectal Cancer
CIC-HetDel	ACH-001496	ESO26	Esophageal Cancer
CIC-HetDel	ACH-001500	FLO1	Esophageal Cancer
CIC-HetDel	ACH-001521	HKA1	Head and Neck Cancer
CIC-HetDel	ACH-001526	HUO9	Bone Cancer
CIC-WT	ACH-000004	HEL	Leukemia
CIC-WT	ACH-000005	HEL9217	Leukemia
CIC-WT	ACH-000007	LS513	Colon/Colorectal Cancer
CIC-WT	ACH-000009	C2BBE1	Colon/Colorectal Cancer
CIC-WT	ACH-000011	253J	Bladder Cancer
CIC-WT	ACH-000012	HCC827	Lung Cancer
CIC-WT	ACH-000013	ONCODG1	Ovarian Cancer
CIC-WT	ACH-000014	HS294T	Skin Cancer
CIC-WT	ACH-000017	SKBR3	Breast Cancer
CIC-WT	ACH-000018	T24	Bladder Cancer
CIC-WT	ACH-000019	MCF7	Breast Cancer
CIC-WT	ACH-000021	NCIH1693	Lung Cancer
CIC-WT	ACH-000022	PATU8988S	Pancreatic Cancer
CIC-WT	ACH-000024	OPM2	Myeloma
CIC-WT	ACH-000025	CH157MN	Brain Cancer
CIC-WT	ACH-000028	KPL1	Breast Cancer
CIC-WT	ACH-000029	HCC827GR5	Lung Cancer
CIC-WT	ACH-000036	U343	Brain Cancer
CIC-WT	ACH-000037	S117	Sarcoma
CIC-WT	ACH-000039	SKNMC	Bone Cancer
CIC-WT	ACH-000040	U118MG	Brain Cancer
CIC-WT	ACH-000041	RDES	Bone Cancer
CIC-WT	ACH-000042	PANC0203	Pancreatic Cancer
CIC-WT	ACH-000048	TOV112D	Ovarian Cancer
CIC-WT	ACH-000052	A673	Bone Cancer
CIC-WT	ACH-000053	KARPAS299	Lymphoma
CIC-WT	ACH-000054	HT1080	Sarcoma
CIC-WT	ACH-000060	PANC1005	Pancreatic Cancer
CIC-WT	ACH-000067	HS683	Brain Cancer
CIC-WT	ACH-000070	697	Leukemia
CIC-WT	ACH-000075	U87MG	Brain Cancer
CIC-WT	ACH-000078	MHHNB11	Neuroblastoma
CIC-WT	ACH-000082	G292CLONEA141B1	Bone Cancer
CIC-WT	ACH-000085	T3M4	Pancreatic Cancer
CIC-WT	ACH-000086	ACCMESO1	Lung Cancer
CIC-WT	ACH-000087	SKES1	Bone Cancer
CIC-WT	ACH-000095	D341	Brain Cancer
CIC-WT	ACH-000096	G401	Rhabdoid
CIC-WT	ACH-000097	ZR751	Breast Cancer
CIC-WT	ACH-000098	GAMG	Brain Cancer
CIC-WT	ACH-000099	SIMA	Neuroblastoma
CIC-WT	ACH-000108	KP3	Pancreatic Cancer
CIC-WT	ACH-000111	HCC1187	Breast Cancer
CIC-WT	ACH-000113	OCIAML2	Leukemia
CIC-WT	ACH-000115	VCAP	Prostate Cancer
CIC-WT	ACH-000116	OAW28	Ovarian Cancer
CIC-WT	ACH-000123	COV434	Ovarian Cancer
CIC-WT	ACH-000127	SLR20	Kidney Cancer
CIC-WT	ACH-000128	LN319	Brain Cancer
CIC-WT	ACH-000133	HS729	Fibroblast
CIC-WT	ACH-000137	8MGBA	Brain Cancer
CIC-WT	ACH-000138	CFPAC1	Pancreatic Cancer
CIC-WT	ACH-000141	SNU308	Gallbladder Cancer
CIC-WT	ACH-000142	CAL29	Bladder Cancer
CIC-WT	ACH-000143	HCC2429	Lung Cancer
CIC-WT	ACH-000146	THP1	Leukemia
CIC-WT	ACH-000148	HS578T	Breast Cancer
CIC-WT	ACH-000150	HCC2935	Lung Cancer
CIC-WT	ACH-000151	JM1	Leukemia
CIC-WT	ACH-000153	NCIH2052	Lung Cancer
CIC-WT	ACH-000159	OSRC2	Kidney Cancer
CIC-WT	ACH-000160	BT12	Rhabdoid
CIC-WT	ACH-000164	PANC1	Pancreatic Cancer
CIC-WT	ACH-000167	KE97	Gastric Cancer
CIC-WT	ACH-000169	RD	Sarcoma
CIC-WT	ACH-000174	CAL62	Thyroid Cancer
CIC-WT	ACH-000178	HS766T	Pancreatic Cancer
CIC-WT	ACH-000183	L363	Myeloma
CIC-WT	ACH-000187	CORL311	Lung Cancer
CIC-WT	ACH-000188	SCC25	Head and Neck Cancer
CIC-WT	ACH-000189	RCC10RGB	Kidney Cancer
CIC-WT	ACH-000190	HDMYZ	Lymphoma
CIC-WT	ACH-000200	NMCG1	Brain Cancer
CIC-WT	ACH-000202	COLO320	Colon/Colorectal Cancer
CIC-WT	ACH-000204	LP1	Myeloma
CIC-WT	ACH-000206	C8166	Lymphoma
CIC-WT	ACH-000207	DETROIT562	Head and Neck Cancer
CIC-WT	ACH-000209	SNU1079	Bile Duct Cancer
CIC-WT	ACH-000211	DAOY	Brain Cancer
CIC-WT	ACH-000215	LN382	Brain Cancer
CIC-WT	ACH-000219	A375	Skin Cancer
CIC-WT	ACH-000221	SNU398	Liver Cancer
CIC-WT	ACH-000222	ASPC1	Pancreatic Cancer
CIC-WT	ACH-000223	HCC1937	Breast Cancer
CIC-WT	ACH-000226	SUPM2	Lymphoma
CIC-WT	ACH-000228	BICR31	Head and Neck Cancer
CIC-WT	ACH-000231	KALS1	Brain Cancer
CIC-WT	ACH-000233	DEL	Lymphoma
CIC-WT	ACH-000235	PANC0403	Pancreatic Cancer
CIC-WT	ACH-000237	JHOM1	Ovarian Cancer
CIC-WT	ACH-000238	SCC4	Head and Neck Cancer
CIC-WT	ACH-000243	DANG	Pancreatic Cancer
CIC-WT	ACH-000244	DKMG	Brain Cancer
CIC-WT	ACH-000246	SLR23	Kidney Cancer
CIC-WT	ACH-000247	OCUM1	Gastric Cancer
CIC-WT	ACH-000248	AU565	Breast Cancer
CIC-WT	ACH-000250	KMRC20	Kidney Cancer
CIC-WT	ACH-000251	NCIH2887	Lung Cancer
CIC-WT	ACH-000253	COLO201	Colon/Colorectal Cancer
CIC-WT	ACH-000255	LMSU	Gastric Cancer
CIC-WT	ACH-000257	CORL279	Lung Cancer
CIC-WT	ACH-000258	DU4475	Breast Cancer
CIC-WT	ACH-000259	KELLY	Neuroblastoma
CIC-WT	ACH-000261	RERFLCAI	Lung Cancer
CIC-WT	ACH-000263	KASUMI1	Leukemia
CIC-WT	ACH-000264	CALU6	Lung Cancer
CIC-WT	ACH-000265	KP4	Pancreatic Cancer
CIC-WT	ACH-000266	SNU213	Pancreatic Cancer
CIC-WT	ACH-000271	SUDHL10	Lymphoma
CIC-WT	ACH-000272	SLR24	Kidney Cancer
CIC-WT	ACH-000274	HS852T	Skin Cancer
CIC-WT	ACH-000276	HCC38	Breast Cancer
CIC-WT	ACH-000277	HCC1419	Breast Cancer
CIC-WT	ACH-000280	SNU840	Ovarian Cancer
CIC-WT	ACH-000281	KP2	Pancreatic Cancer
CIC-WT	ACH-000286	SNU1033	Colon/Colorectal Cancer
CIC-WT	ACH-000288	BT549	Breast Cancer
CIC-WT	ACH-000290	NCIH209	Lung Cancer
CIC-WT	ACH-000292	NCIH841	Lung Cancer
CIC-WT	ACH-000295	EM2	Leukemia
CIC-WT	ACH-000304	WM115	Skin Cancer
CIC-WT	ACH-000307	PK1	Pancreatic Cancer
CIC-WT	ACH-000310	IMR32	Neuroblastoma
CIC-WT	ACH-000311	NCIH2122	Lung Cancer
CIC-WT	ACH-000312	SKNBE2	Neuroblastoma
CIC-WT	ACH-000315	KARPAS422	Lymphoma
CIC-WT	ACH-000317	TUHR14TKB	Kidney Cancer
CIC-WT	ACH-000318	TE10	Esophageal Cancer
CIC-WT	ACH-000320	PSN1	Pancreatic Cancer
CIC-WT	ACH-000322	HT144	Skin Cancer
CIC-WT	ACH-000323	42MGBA	Brain Cancer
CIC-WT	ACH-000324	JHOC5	Ovarian Cancer
CIC-WT	ACH-000326	JURLMK1	Leukemia
CIC-WT	ACH-000329	CCFSTTG1	Brain Cancer
CIC-WT	ACH-000330	EFM19	Breast Cancer
CIC-WT	ACH-000331	ISTMES2	Lung Cancer
CIC-WT	ACH-000334	DB	Lymphoma
CIC-WT	ACH-000335	MSTO211H	Lung Cancer
CIC-WT	ACH-000336	OCIAML3	Leukemia
CIC-WT	ACH-000337	NCIH3122	Lung Cancer
CIC-WT	ACH-000339	HCC461	Lung Cancer
CIC-WT	ACH-000341	SKNFI	Neuroblastoma
CIC-WT	ACH-000343	NCIH522	Lung Cancer
CIC-WT	ACH-000348	RPMI7951	Skin Cancer
CIC-WT	ACH-000350	COLO678	Colon/Colorectal Cancer
CIC-WT	ACH-000355	NCIH82	Lung Cancer
CIC-WT	ACH-000356	MKN45	Gastric Cancer
CIC-WT	ACH-000361	SKHEP1	Liver Cancer
CIC-WT	ACH-000363	SKMM2	Myeloma
CIC-WT	ACH-000364	U2OS	Bone Cancer
CIC-WT	ACH-000365	SUDHL4	Lymphoma
CIC-WT	ACH-000366	SKNDZ	Neuroblastoma
CIC-WT	ACH-000368	SNU1105	Brain Cancer
CIC-WT	ACH-000374	HCC1143	Breast Cancer
CIC-WT	ACH-000375	G402	Kidney Cancer
CIC-WT	ACH-000376	SF295	Brain Cancer
CIC-WT	ACH-000383	OE33	Esophageal Cancer
CIC-WT	ACH-000385	SKRC20	Kidney Cancer
CIC-WT	ACH-000387	TF1	Leukemia
CIC-WT	ACH-000389	H4	Brain Cancer
CIC-WT	ACH-000390	LUDLU1	Lung Cancer
CIC-WT	ACH-000395	NCIH520	Lung Cancer
CIC-WT	ACH-000401	COLO800	Skin Cancer
CIC-WT	ACH-000402	BL70	Lymphoma
CIC-WT	ACH-000403	NCIH747	Colon/Colorectal Cancer
CIC-WT	ACH-000404	K029AX	Skin Cancer
CIC-WT	ACH-000405	MEC1	Leukemia
CIC-WT	ACH-000406	U937	Leukemia
CIC-WT	ACH-000407	SNU685	Endometrial/Uterine Cancer
CIC-WT	ACH-000410	SAOS2	Bone Cancer
CIC-WT	ACH-000411	769P	Kidney Cancer
CIC-WT	ACH-000415	BICR6	Head and Neck Cancer
CIC-WT	ACH-000416	NCIH838	Lung Cancer
CIC-WT	ACH-000420	SNU449	Liver Cancer
CIC-WT	ACH-000421	SW837	Colon/Colorectal Cancer
CIC-WT	ACH-000424	TC71	Bone Cancer
CIC-WT	ACH-000425	UACC62	Skin Cancer
CIC-WT	ACH-000426	KMS20	Myeloma
CIC-WT	ACH-000427	NCIN87	Gastric Cancer
CIC-WT	ACH-000431	NCIH1694	Lung Cancer
CIC-WT	ACH-000434	NCIH1915	Lung Cancer
CIC-WT	ACH-000435	EFE184	Endometrial/Uterine Cancer
CIC-WT	ACH-000436	OCIMY7	Myeloma
CIC-WT	ACH-000437	SW1088	Brain Cancer
CIC-WT	ACH-000444	LU99	Lung Cancer
CIC-WT	ACH-000445	KNS60	Brain Cancer
CIC-WT	ACH-000448	NCIH1666	Lung Cancer
CIC-WT	ACH-000450	MELHO	Skin Cancer
CIC-WT	ACH-000452	TE8	Esophageal Cancer
CIC-WT	ACH-000454	HCC95	Lung Cancer
CIC-WT	ACH-000458	CJM	Skin Cancer
CIC-WT	ACH-000459	TUHR10TKB	Kidney Cancer
CIC-WT	ACH-000460	SNU8	Ovarian Cancer
CIC-WT	ACH-000461	SNU1196	Bile Duct Cancer
CIC-WT	ACH-000463	NCIH460	Lung Cancer
CIC-WT	ACH-000464	CAS1	Brain Cancer
CIC-WT	ACH-000466	SNU216	Gastric Cancer
CIC-WT	ACH-000467	HCC56	Colon/Colorectal Cancer
CIC-WT	ACH-000469	YH13	Brain Cancer
CIC-WT	ACH-000472	HSC2	Head and Neck Cancer
CIC-WT	ACH-000473	RT112	Bladder Cancer
CIC-WT	ACH-000475	HUH1	Liver Cancer
CIC-WT	ACH-000477	MALME3M	Skin Cancer
CIC-WT	ACH-000478	SNU387	Liver Cancer
CIC-WT	ACH-000480	HUH7	Liver Cancer
CIC-WT	ACH-000483	SNU182	Liver Cancer
CIC-WT	ACH-000485	GSU	Gastric Cancer
CIC-WT	ACH-000486	KU1919	Bladder Cancer
CIC-WT	ACH-000487	F36P	Leukemia
CIC-WT	ACH-000488	TE11	Esophageal Cancer
CIC-WT	ACH-000490	SF767	Brain Cancer
CIC-WT	ACH-000493	SNU423	Liver Cancer
CIC-WT	ACH-000495	TUHR4TKB	Kidney Cancer
CIC-WT	ACH-000498	KO52	Leukemia
CIC-WT	ACH-000499	EW8	Bone Cancer
CIC-WT	ACH-000504	SNB75	Brain Cancer
CIC-WT	ACH-000505	RKN	Sarcoma
CIC-WT	ACH-000511	CALU1	Lung Cancer
CIC-WT	ACH-000512	INA6	Myeloma
CIC-WT	ACH-000514	NCIH1092	Lung Cancer
CIC-WT	ACH-000518	CAL33	Head and Neck Cancer
CIC-WT	ACH-000520	59M	Ovarian Cancer
CIC-WT	ACH-000521	NCIH2030	Lung Cancer
CIC-WT	ACH-000522	UMUC3	Bladder Cancer
CIC-WT	ACH-000527	OVISE	Ovarian Cancer
CIC-WT	ACH-000528	ABC1	Lung Cancer
CIC-WT	ACH-000537	SNU761	Liver Cancer
CIC-WT	ACH-000541	KMS34	Myeloma
CIC-WT	ACH-000542	HEYA8	Ovarian Cancer
CIC-WT	ACH-000547	HT1197	Bladder Cancer
CIC-WT	ACH-000548	BHY	Head and Neck Cancer
CIC-WT	ACH-000550	IGR39	Skin Cancer
CIC-WT	ACH-000552	HT29	Colon/Colorectal Cancer
CIC-WT	ACH-000556	SIHA	Cervical Cancer
CIC-WT	ACH-000557	AML193	Leukemia
CIC-WT	ACH-000563	EBC1	Lung Cancer
CIC-WT	ACH-000570	YKG1	Brain Cancer
CIC-WT	ACH-000571	T98G	Brain Cancer
CIC-WT	ACH-000577	JHH2	Liver Cancer
CIC-WT	ACH-000579	UACC257	Skin Cancer
CIC-WT	ACH-000580	C32	Skin Cancer
CIC-WT	ACH-000583	MC116	Lymphoma
CIC-WT	ACH-000584	JHOS4	Ovarian Cancer
CIC-WT	ACH-000585	EPLC272H	Lung Cancer
CIC-WT	ACH-000588	KMS26	Myeloma
CIC-WT	ACH-000589	NCIH1437	Lung Cancer
CIC-WT	ACH-000591	LN235	Brain Cancer
CIC-WT	ACH-000592	TM31	Brain Cancer
CIC-WT	ACH-000593	BC3C	Bladder Cancer
CIC-WT	ACH-000596	LCLC97TM1	Lung Cancer
CIC-WT	ACH-000600	SLR26	Kidney Cancer
CIC-WT	ACH-000601	MIAPACA2	Pancreatic Cancer
CIC-WT	ACH-000604	KYO1	Leukemia
CIC-WT	ACH-000605	TE6	Esophageal Cancer
CIC-WT	ACH-000606	PECAPJ34CLONEC12	Head and Neck Cancer
CIC-WT	ACH-000608	COV644	Ovarian Cancer
CIC-WT	ACH-000614	RVH421	Skin Cancer
CIC-WT	ACH-000616	HS746T	Gastric Cancer
CIC-WT	ACH-000618	SNU1041	Head and Neck Cancer
CIC-WT	ACH-000619	PECAPJ15	Head and Neck Cancer
CIC-WT	ACH-000622	KNS42	Brain Cancer
CIC-WT	ACH-000623	SNU201	Brain Cancer
CIC-WT	ACH-000627	LCLC103H	Lung Cancer
CIC-WT	ACH-000630	YD8	Head and Neck Cancer
CIC-WT	ACH-000632	HS944T	Skin Cancer
CIC-WT	ACH-000633	FU97	Gastric Cancer
CIC-WT	ACH-000637	KYSE520	Esophageal Cancer
CIC-WT	ACH-000638	NCIH441	Lung Cancer
CIC-WT	ACH-000647	TE1	Esophageal Cancer
CIC-WT	ACH-000648	NCIH28	Lung Cancer
CIC-WT	ACH-000651	SW620	Colon/Colorectal Cancer
CIC-WT	ACH-000652	SUIT2	Pancreatic Cancer
CIC-WT	ACH-000653	JJN3	Myeloma
CIC-WT	ACH-000654	RAJI	Lymphoma
CIC-WT	ACH-000655	SF268	Brain Cancer
CIC-WT	ACH-000657	A2780	Ovarian Cancer
CIC-WT	ACH-000658	KMS18	Myeloma
CIC-WT	ACH-000661	WM1799	Skin Cancer
CIC-WT	ACH-000663	OVTOKO	Ovarian Cancer
CIC-WT	ACH-000665	SKMES1	Lung Cancer
CIC-WT	ACH-000671	HUH6	Liver Cancer
CIC-WT	ACH-000673	LN443	Brain Cancer
CIC-WT	ACH-000676	LN464	Brain Cancer
CIC-WT	ACH-000677	SW1573	Lung Cancer
CIC-WT	ACH-000682	SNU1066	Head and Neck Cancer
CIC-WT	ACH-000683	SNU503	Colon/Colorectal Cancer
CIC-WT	ACH-000684	KMRC1	Kidney Cancer
CIC-WT	ACH-000685	L33	Pancreatic Cancer
CIC-WT	ACH-000688	OV7	Ovarian Cancer
CIC-WT	ACH-000693	KYSE180	Esophageal Cancer
CIC-WT	ACH-000696	OVCAR8	Ovarian Cancer
CIC-WT	ACH-000702	L1236	Lymphoma
CIC-WT	ACH-000706	EKVX	Lung Cancer
CIC-WT	ACH-000711	JIMT1	Breast Cancer
CIC-WT	ACH-000713	CAOV3	Ovarian Cancer
CIC-WT	ACH-000714	KMS11	Myeloma
CIC-WT	ACH-000718	NCIH2291	Lung Cancer
CIC-WT	ACH-000720	TCCSUP	Bladder Cancer
CIC-WT	ACH-000721	HMC18	Breast Cancer
CIC-WT	ACH-000725	HCC202	Breast Cancer
CIC-WT	ACH-000735	PECAPJ49	Head and Neck Cancer
CIC-WT	ACH-000739	HEPG2	Liver Cancer
CIC-WT	ACH-000740	A253	Head and Neck Cancer
CIC-WT	ACH-000747	NCIH1703	Lung Cancer
CIC-WT	ACH-000748	SJSA1	Bone Cancer
CIC-WT	ACH-000753	JMSU1	Bladder Cancer
CIC-WT	ACH-000756	GI1	Brain Cancer
CIC-WT	ACH-000757	A427	Lung Cancer
CIC-WT	ACH-000758	MKN74	Gastric Cancer
CIC-WT	ACH-000760	LNZ308	Brain Cancer
CIC-WT	ACH-000762	YD38	Head and Neck Cancer
CIC-WT	ACH-000764	SH10TC	Gastric Cancer
CIC-WT	ACH-000765	WM983B	Skin Cancer
CIC-WT	ACH-000766	NCIH1648	Lung Cancer
CIC-WT	ACH-000767	NCIH526	Lung Cancer
CIC-WT	ACH-000768	MDAMB231	Breast Cancer
CIC-WT	ACH-000769	LK2	Lung Cancer
CIC-WT	ACH-000771	BICR56	Head and Neck Cancer
CIC-WT	ACH-000775	NCIH727	Lung Cancer
CIC-WT	ACH-000776	ONS76	Brain Cancer
CIC-WT	ACH-000778	HSC3	Head and Neck Cancer
CIC-WT	ACH-000782	SEM	Leukemia
CIC-WT	ACH-000783	CAMA1	Breast Cancer
CIC-WT	ACH-000784	KYSE70	Esophageal Cancer
CIC-WT	ACH-000785	NCIH2126	Lung Cancer
CIC-WT	ACH-000788	A2058	Skin Cancer
CIC-WT	ACH-000790	SHP77	Lung Cancer
CIC-WT	ACH-000791	RERFLCAD1	Lung Cancer
CIC-WT	ACH-000792	BFTC909	Kidney Cancer
CIC-WT	ACH-000793	KATOIII	Gastric Cancer
CIC-WT	ACH-000794	BICR22	Head and Neck Cancer
CIC-WT	ACH-000796	MCAS	Ovarian Cancer
CIC-WT	ACH-000799	HS695T	Skin Cancer
CIC-WT	ACH-000800	NCIH446	Lung Cancer
CIC-WT	ACH-000801	HS936T	Skin Cancer
CIC-WT	ACH-000802	BFTC905	Bladder Cancer
CIC-WT	ACH-000804	NB1	Neuroblastoma
CIC-WT	ACH-000805	COLO679	Skin Cancer
CIC-WT	ACH-000807	SNU738	Brain Cancer
CIC-WT	ACH-000809	KYSE410	Esophageal Cancer
CIC-WT	ACH-000810	SKMEL30	Skin Cancer
CIC-WT	ACH-000814	HS939T	Skin Cancer
CIC-WT	ACH-000819	LN18	Brain Cancer
CIC-WT	ACH-000820	SW403	Colon/Colorectal Cancer
CIC-WT	ACH-000821	EJM	Myeloma
CIC-WT	ACH-000822	SKMEL24	Skin Cancer
CIC-WT	ACH-000823	KYSE140	Esophageal Cancer
CIC-WT	ACH-000826	CAL12T	Lung Cancer
CIC-WT	ACH-000827	WM793	Skin Cancer
CIC-WT	ACH-000829	HUNS1	Myeloma
CIC-WT	ACH-000831	HEC50B	Endometrial/Uterine Cancer
CIC-WT	ACH-000832	CAL27	Head and Neck Cancer
CIC-WT	ACH-000833	RH30	Sarcoma
CIC-WT	ACH-000834	UMUC1	Bladder Cancer
CIC-WT	ACH-000835	GCT	Sarcoma
CIC-WT	ACH-000836	YD15	Head and Neck Cancer
CIC-WT	ACH-000837	NCIH322	Lung Cancer
CIC-WT	ACH-000838	AMO1	Myeloma
CIC-WT	ACH-000843	HARA	Lung Cancer
CIC-WT	ACH-000846	FADU	Head and Neck Cancer
CIC-WT	ACH-000848	JHH7	Liver Cancer
CIC-WT	ACH-000851	MORCPR	Lung Cancer
CIC-WT	ACH-000853	NCIH661	Lung Cancer
CIC-WT	ACH-000854	OCIMY5	Myeloma
CIC-WT	ACH-000855	KYSE150	Esophageal Cancer
CIC-WT	ACH-000856	CAL51	Breast Cancer
CIC-WT	ACH-000858	KNS62	Lung Cancer
CIC-WT	ACH-000859	HCC1954	Breast Cancer
CIC-WT	ACH-000862	KMBC2	Bladder Cancer
CIC-WT	ACH-000866	NCIH1048	Lung Cancer
CIC-WT	ACH-000869	NCIH1568	Lung Cancer
CIC-WT	ACH-000876	MDAMB415	Breast Cancer
CIC-WT	ACH-000878	HCC15	Lung Cancer
CIC-WT	ACH-000881	MELJUSO	Skin Cancer
CIC-WT	ACH-000882	IGR1	Skin Cancer
CIC-WT	ACH-000885	TOV21G	Ovarian Cancer
CIC-WT	ACH-000887	SF172	Brain Cancer
CIC-WT	ACH-000888	NCIH1793	Lung Cancer
CIC-WT	ACH-000890	SW1271	Lung Cancer
CIC-WT	ACH-000896	647V	Bladder Cancer
CIC-WT	ACH-000898	SNU719	Gastric Cancer
CIC-WT	ACH-000899	WM88	Skin Cancer
CIC-WT	ACH-000905	5637	Bladder Cancer
CIC-WT	ACH-000906	ES2	Ovarian Cancer
CIC-WT	ACH-000911	NUGC3	Gastric Cancer
CIC-WT	ACH-000913	ESS1	Endometrial/Uterine Cancer
CIC-WT	ACH-000915	IPC298	Skin Cancer
CIC-WT	ACH-000917	TE4	Esophageal Cancer
CIC-WT	ACH-000926	HT55	Colon/Colorectal Cancer
CIC-WT	ACH-000929	NCIH2110	Lung Cancer
CIC-WT	ACH-000935	MDST8	Colon/Colorectal Cancer
CIC-WT	ACH-000936	EFO27	Ovarian Cancer
CIC-WT	ACH-000943	RKO	Colon/Colorectal Cancer
CIC-WT	ACH-000950	LOVO	Colon/Colorectal Cancer
CIC-WT	ACH-000958	SW48	Colon/Colorectal Cancer
CIC-WT	ACH-000968	COLO792	Skin Cancer
CIC-WT	ACH-000973	639V	Bladder Cancer
CIC-WT	ACH-000975	HCC2450	Lung Cancer
CIC-WT	ACH-000976	HUCCT1	Bile Duct Cancer
CIC-WT	ACH-000986	HT115	Colon/Colorectal Cancer
CIC-WT	ACH-000993	JHUEM7	Endometrial/Uterine Cancer
CIC-WT	ACH-001001	143B	Bone Cancer
CIC-WT	ACH-001020	BT16	Rhabdoid
CIC-WT	ACH-001028	CHLA06ATRT	Rhabdoid
CIC-WT	ACH-001031	CHLA266	Rhabdoid
CIC-WT	ACH-001038	COGE352	Bone Cancer
CIC-WT	ACH-001048	COV504	Ovarian Cancer
CIC-WT	ACH-001050	CW9019	Sarcoma
CIC-WT	ACH-001053	D425	Brain Cancer
CIC-WT	ACH-001054	D458	Brain Cancer
CIC-WT	ACH-001061	DLD1	Colon/Colorectal Cancer
CIC-WT	ACH-001067	F5	Brain Cancer
CIC-WT	ACH-001075	NCIH292	Lung Cancer
CIC-WT	ACH-001096	JR	Sarcoma
CIC-WT	ACH-001129	MONOMAC1	Leukemia
CIC-WT	ACH-001134	MYLA	Lymphoma
CIC-WT	ACH-001151	OVCAR5	Ovarian Cancer
CIC-WT	ACH-001163	CCLFPEDS0001T	Kidney Cancer
CIC-WT	ACH-001173	R262	Brain Cancer
CIC-WT	ACH-001183	RT11284	Bladder Cancer
CIC-WT	ACH-001184	SCMCRM2	Sarcoma
CIC-WT	ACH-001192	SKNEP1	Bone Cancer
CIC-WT	ACH-001193	SKPNDW	Bone Cancer
CIC-WT	ACH-001196	SMSCTR	Sarcoma
CIC-WT	ACH-001197	SMZ1	Lymphoma
CIC-WT	ACH-001205	TC32	Bone Cancer
CIC-WT	ACH-001211	TTC549	Rhabdoid
CIC-WT	ACH-001212	TTC642	Rhabdoid
CIC-WT	ACH-001228	UPCISCC152	Head and Neck Cancer
CIC-WT	ACH-001232	UW228	Brain Cancer
CIC-WT	ACH-001239	WM2664	Skin Cancer
CIC-WT	ACH-001274	SW982	Sarcoma
CIC-WT	ACH-001275	SYO1	Sarcoma
CIC-WT	ACH-001277	YAMATO	Sarcoma
CIC-WT	ACH-001279	SCCOHT1	Rhabdoid
CIC-WT	ACH-001280	SCS214	Sarcoma
CIC-WT	ACH-001283	TC106	Bone Cancer
CIC-WT	ACH-001289	COGAR359	Rhabdoid
CIC-WT	ACH-001295	Y79	Eye Cancer
CIC-WT	ACH-001300	CHLA15	Neuroblastoma
CIC-WT	ACH-001301	COGN278	Neuroblastoma
CIC-WT	ACH-001303	NB1643	Neuroblastoma
CIC-WT	ACH-001306	8305C	Thyroid Cancer
CIC-WT	ACH-001318	PLCPRF5	Liver Cancer
CIC-WT	ACH-001322	CME1	Sarcoma
CIC-WT	ACH-001328	A431	Skin Cancer
CIC-WT	ACH-001329	ANGMCSS	Brain Cancer
CIC-WT	ACH-001332	BICR78	Head and Neck Cancer
CIC-WT	ACH-001333	C33A	Cervical Cancer
CIC-WT	ACH-001336	CASKI	Cervical Cancer
CIC-WT	ACH-001344	GIMEN	Neuroblastoma
CIC-WT	ACH-001346	H103	Head and Neck Cancer
CIC-WT	ACH-001353	JOPACA1	Pancreatic Cancer
CIC-WT	ACH-001354	LAN2	Neuroblastoma
CIC-WT	ACH-001366	NGP	Neuroblastoma
CIC-WT	ACH-001368	OACM51	Esophageal Cancer
CIC-WT	ACH-001374	PA1	Ovarian Cancer
CIC-WT	ACH-001377	PACADD137	Pancreatic Cancer
CIC-WT	ACH-001380	PACADD165	Pancreatic Cancer
CIC-WT	ACH-001382	PACADD188	Pancreatic Cancer
CIC-WT	ACH-001390	SUM149PT	Breast Cancer
CIC-WT	ACH-001391	SUM159PT	Breast Cancer
CIC-WT	ACH-001394	SUM229PE	Breast Cancer
CIC-WT	ACH-001396	SUM52PE	Breast Cancer
CIC-WT	ACH-001402	SW756	Cervical Cancer
CIC-WT	ACH-001403	TO14	Ovarian Cancer
CIC-WT	ACH-001407	UMUC13	Bladder Cancer
CIC-WT	ACH-001408	UMUC14	Bladder Cancer
CIC-WT	ACH-001409	UMUC16	Bladder Cancer
CIC-WT	ACH-001411	UMUC5	Bladder Cancer
CIC-WT	ACH-001413	UMUC11	Bladder Cancer
CIC-WT	ACH-001414	UMUC6	Bladder Cancer
CIC-WT	ACH-001430	TC138	Bone Cancer
CIC-WT	ACH-001431	TC205	Bone Cancer
CIC-WT	ACH-001433	CCLFPEDS0008T	Sarcoma
CIC-WT	ACH-001450	BLUE1	Lymphoma
CIC-WT	ACH-001454	C10	Colon/Colorectal Cancer
CIC-WT	ACH-001459	C80	Colon/Colorectal Cancer
CIC-WT	ACH-001460	C84	Colon/Colorectal Cancer
CIC-WT	ACH-001461	C99	Colon/Colorectal Cancer
CIC-WT	ACH-001484	CI	Leukemia
CIC-WT	ACH-001485	CII	Leukemia
CIC-WT	ACH-001494	EGI1	Bile Duct Cancer
CIC-WT	ACH-001495	EMTOKA	Endometrial/Uterine Cancer
CIC-WT	ACH-001509	H357	Head and Neck Cancer
CIC-WT	ACH-001510	H376	Head and Neck Cancer
CIC-WT	ACH-001515	HCS2	Cervical Cancer
CIC-WT	ACH-001520	HG3	Leukemia
CIC-WT	ACH-001522	HMY1	Skin Cancer
CIC-WT	ACH-001523	HSC1	Skin Cancer
CIC-WT	ACH-001524	HSC5	Skin Cancer
CIC-WT	ACH-001529	JAR	Endometrial/Uterine Cancer
CIC-WT	ACH-001530	JEG3	Endometrial/Uterine Cancer
CIC-WT	ACH-001532	JMURTK2	Rhabdoid
CIC-WT	ACH-001548	LS	Neuroblastoma
CIC-WT	ACH-001550	MCC13	Skin Cancer
CIC-WT	ACH-001551	MCC142	Skin Cancer
CIC-WT	ACH-001552	MCC26	Skin Cancer
CIC-WT	ACH-001554	MEL202	Eye Cancer
CIC-WT	ACH-001555	MERO14	Lung Cancer
CIC-WT	ACH-001559	MERO82	Lung Cancer
CIC-WT	ACH-001563	MM127	Skin Cancer
CIC-WT	ACH-001566	MM370	Skin Cancer
CIC-WT	ACH-001567	MM383	Skin Cancer
CIC-WT	ACH-001568	MM386	Skin Cancer
CIC-WT	ACH-001570	MM426	Skin Cancer
CIC-WT	ACH-001607	NOZ	Gallbladder Cancer
CIC-WT	ACH-001608	NP2	Brain Cancer
CIC-WT	ACH-001610	NP5	Brain Cancer
CIC-WT	ACH-001611	NP8	Brain Cancer
CIC-WT	ACH-001618	OCIM2	Leukemia
CIC-WT	ACH-001619	OCUG1	Gallbladder Cancer
CIC-WT	ACH-001622	ONDA7	Brain Cancer
CIC-WT	ACH-001624	ONDA9	Brain Cancer
CIC-WT	ACH-001628	PEA1	Ovarian Cancer
CIC-WT	ACH-001645	SEKI	Skin Cancer
CIC-WT	ACH-001647	SHI1	Leukemia
CIC-WT	ACH-001651	SKGI	Endometrial/Uterine Cancer
CIC-WT	ACH-001653	SKGT2	Gastric Cancer
CIC-WT	ACH-001654	SKGT4	Esophageal Cancer
CIC-WT	ACH-001664	SNU638	Gastric Cancer
CIC-WT	ACH-001673	TFK1	Bile Duct Cancer
CIC-WT	ACH-001677	U2904	Lymphoma
CIC-WT	ACH-001685	UHO1	Lymphoma
CIC-WT	ACH-001715	CAL72	Bone Cancer
CIC-WT	ACH-001736	HB1119	Leukemia
CIC-WT	ACH-001737	HSB2	Leukemia
CIC-WT	ACH-001740	RH28	Sarcoma
CIC-WT	ACH-001745	RHJT	Sarcoma
CIC-WT	ACH-001750	TTC442	Sarcoma
CIC-WT	ACH-001765	RH4	Sarcoma
CIC-WT	ACH-001790	RH18DM	Sarcoma
CIC-WT	ACH-001791	LPS6	Liposarcoma
CIC-WT	ACH-001793	LPS27	Liposarcoma
CIC-WT	ACH-001796	95T1000	Liposarcoma
CIC-WT	ACH-001799	LPS141	Liposarcoma
CIC-WT	ACH-001802	LPS853	Liposarcoma
CIC-WT	ACH-001814	OS252	Bone Cancer
CIC-WT	ACH-001836	ICC108	Bile Duct Cancer
CIC-WT	ACH-001841	ICC15	Bile Duct Cancer
CIC-WT	ACH-001843	ICC3	Bile Duct Cancer
CIC-WT	ACH-001848	ICC8	Bile Duct Cancer
CIC-WT	ACH-001849	ICC9	Bile Duct Cancer
CIC-WT	ACH-001856	RBE	Bile Duct Cancer
CIC-WT	ACH-001857	SG231	Bile Duct Cancer
CIC-WT	ACH-001858	SSP25	Bile Duct Cancer
CIC-WT	ACH-001864	YSCCC	Bile Duct Cancer
CIC-WT	ACH-001955	JHC7	Bone Cancer
CIC-WT	ACH-001957	UMCHOR1	Bone Cancer
CIC-WT	ACH-001959	CCLP1	Bile Duct Cancer
CIC-WT	ACH-001960	CCSW1	Bile Duct Cancer
CIC-WT	ACH-001997	ECC2	Bile Duct Cancer
CIC-WT	ACH-002001	A375SKINCJ1	Skin Cancer
CIC-WT	ACH-002003	A375SKINCJ3	Skin Cancer
CIC-WT	ACH-002004	UACC62SKINCJ1	Skin Cancer
CIC-WT	ACH-002005	SKMEL19	Skin Cancer
CIC-WT	ACH-002015	MEL285	Eye Cancer
