# Supplementary material for: Multi-Omic Analysis of CIC’s Functional Networks Reveals Novel Interaction Partners and a Potential Role in Mitotic Fidelity
Source: Cancers (Basel). 2023 May 17;15(10):2805. doi: 10.3390/cancers15102805 (PMC10216487; doi:10.3390/cancers15102805)
Supplement: Supplementary file 1 [file cancers-15-02805-s001.zip › Supplemental_Table_S3_GI_HomDel.xlsx]

## Sheet: S3a (prediction results)
Supplemental Table S3: In silico genome-wide screening result comparing CICHomDel mutant cell lines to CICWT control cell lines. a Results obtained from lethality probability comparisons between CICHomDel and CICWT lines. P-values were obtained using Mann-Whitney U tests. Adjusted p-values were calculated using permutation tests with 10,000 random sampling.
Hugo symbol	CICWT median lethality probability	CICHomDel median lethality probability	Log2FC (CICHomDel / CICWT median lethality probabilities)	P-value	Adj. p-value	Interaction score	Significant	Rank
ARID2	0.296	0.935	1.65937	0.0194	0.0138329	1.73825	TRUE	1
ANKRD17	0.253	0.885	1.80654	0.0229	0.0173328	1.5586	TRUE	2
UBE2S	0.301	0.908	1.59293	0.0252	0.019666	1.54931	TRUE	3
IPO5	0.311	0.878	1.49731	0.0234	0.0177661	1.53686	TRUE	4
IPPK	0.29	0.944	1.70273	0.0294	0.0241325	1.52682	TRUE	5
RIF1	0.33	0.828	1.32716	0.0246	0.019166	1.42206	TRUE	6
HNRNPA0	0.322	0.786	1.28747	0.0219	0.0162661	1.40593	TRUE	7
CDH15	0.176	0.719	2.03042	0.0173	0.0117996	1.38633	TRUE	8
ZNF217	0.544	0.962	0.82243	0.0395	0.0365988	1.38195	TRUE	9
TGIF1	0.0119	0.736	5.95067	0.0197	0.0142662	1.35843	TRUE	10
ILK	0.504	0.929	0.882255	0.0378	0.0344989	1.35838	TRUE	11
TAF3	0.354	0.841	1.24836	0.0303	0.0253658	1.34203	TRUE	12
SP1	0.187	0.82	2.13259	0.0294	0.0241325	1.32627	TRUE	13
ZBTB12	0.208	0.698	1.74664	0.0181	0.0125996	1.32595	TRUE	14
LUC7L2	0.278	0.838	1.59187	0.0326	0.0282324	1.29827	TRUE	15
FERMT2	0.632	0.98	0.632857	0.0503	0.0473984	1.29775	TRUE	16
RREB1	0.179	0.776	2.1161	0.0291	0.0237992	1.25979	TRUE	17
CEBPB	0.112	0.706	2.65617	0.0234	0.0177661	1.23579	TRUE	18
CDK10	0.105	0.638	2.60317	0.0173	0.0117996	1.23015	TRUE	19
CIZ1	0.214	0.66	1.62486	0.0201	0.0146995	1.20958	TRUE	20
HAUS2	0.121	0.644	2.41205	0.0189	0.0133662	1.20685	TRUE	21
GNAQ	0.199	0.677	1.76639	0.0222	0.0165328	1.20618	TRUE	22
USP18	0.193	0.728	1.91534	0.0276	0.0221326	1.20482	TRUE	23
H3F3B	0.324	0.733	1.17782	0.0294	0.0241325	1.18555	TRUE	24
GRIN2A	0.1	0.59	2.56071	0.0153	0.0103663	1.17078	TRUE	25
TPM2	0.224	0.659	1.55678	0.0229	0.0173328	1.16059	TRUE	26
CSNK2A1	0.0494	0.673	3.76802	0.027	0.0215659	1.12137	TRUE	27
KIDINS220	0.0192	0.64	5.05889	0.0241	0.0185994	1.10752	TRUE	28
NFE2	0.129	0.577	2.1612	0.0192	0.0135995	1.07696	TRUE	29
CKAP2	0.22	0.682	1.63227	0.0322	0.0278657	1.06046	TRUE	30
CALCOCO1	0.137	0.578	2.07689	0.0202	0.0146995	1.0593	TRUE	31
RB1CC1	0.0561	0.645	3.52323	0.0288	0.0234659	1.05107	TRUE	32
NKX2-5	0.267	0.669	1.32517	0.0313	0.0268658	1.05087	TRUE	33
CTNNA1	0.00942	0.61	6.01694	0.026	0.0205993	1.02855	TRUE	36
PTRH1	0.137	0.593	2.11386	0.0244	0.0187994	1.02343	TRUE	38
DBNDD1	0.0825	0.596	2.85285	0.0257	0.0200327	1.01216	TRUE	39
GATA3	0.205	0.693	1.75723	0.0394	0.0363988	0.997167	TRUE	41
CARM1	0.214	0.746	1.80156	0.05	0.0469318	0.991086	TRUE	42
DGCR6	0.0852	0.565	2.72933	0.0234	0.0177661	0.988981	TRUE	43
ZNF771	0.105	0.524	2.31918	0.0187	0.0131662	0.985402	TRUE	44
PIGS	0.276	0.689	1.31984	0.0413	0.0386654	0.973335	TRUE	45
UGCG	0.0735	0.644	3.13124	0.0353	0.0311323	0.970372	TRUE	46
TNS3	0.21	0.697	1.73077	0.0438	0.040632	0.969619	TRUE	47
ELMOD3	0.147	0.552	1.90885	0.0244	0.0187994	0.952673	TRUE	48
GPR179	0.266	0.677	1.34773	0.0426	0.039732	0.948382	TRUE	49
TM2D2	0.199	0.708	1.83098	0.0491	0.0459318	0.947224	TRUE	51
AJM1	0.106	0.509	2.2636	0.0197	0.0142662	0.939457	TRUE	53
NT5C3B	0.175	0.568	1.69854	0.0282	0.0226992	0.933786	TRUE	55
GZMH	0.205	0.614	1.58261	0.0346	0.0303657	0.931817	TRUE	56
KMT5A	0.324	0.681	1.07166	0.0463	0.0431986	0.929245	TRUE	57
ATP23	0.291	0.661	1.18363	0.0442	0.0410653	0.916493	TRUE	58
ZBTB39	0.258	0.631	1.29027	0.0386	0.0355321	0.914558	TRUE	59
HAO2	0.165	0.551	1.73959	0.0282	0.0226992	0.905838	TRUE	60
LEMD2	0.149	0.65	2.12513	0.0451	0.0419986	0.894897	TRUE	61
PKN3	0.0992	0.509	2.35925	0.0236	0.0179327	0.888894	TRUE	62
PRKCI	0.0133	0.547	5.36204	0.03	0.0249992	0.876335	TRUE	63
MBTD1	0.237	0.664	1.4863	0.051	0.0482651	0.874068	TRUE	65
FAM219A	0.34	0.64	0.912537	0.0506	0.0476317	0.846146	TRUE	69
NR0B2	0.217	0.551	1.34436	0.0346	0.0303657	0.836207	TRUE	74
FIBP	0.154	0.582	1.91809	0.0401	0.0371654	0.832179	TRUE	75
OR4F29	0.111	0.549	2.30625	0.0349	0.030699	0.830569	TRUE	77
SCRT1	0.263	0.588	1.16075	0.0417	0.0390654	0.828026	TRUE	79
COL4A3BP	0.0494	0.518	3.39037	0.0303	0.0253658	0.826599	TRUE	80
GPR45	0.16	0.538	1.74953	0.0401	0.0371654	0.769265	TRUE	89
ZNF862	0.0971	0.503	2.37302	0.036	0.0319989	0.751917	TRUE	93
GNG13	0.231	0.527	1.18991	0.0405	0.0375987	0.750884	TRUE	95
RPE65	0.21	0.518	1.30256	0.0419	0.039132	0.729068	TRUE	105
RBM23	0.19	0.531	1.48271	0.051	0.0482651	0.698991	TRUE	116
BECN1	0.131	0.506	1.94957	0.0447	0.0415986	0.698746	TRUE	117
PAX8	0.0118	0.502	5.41083	0.0455	0.0424986	0.688556	TRUE	120
ZFX	0.34	0.983	1.53166	0.0855	0.0880637	1.03726	FALSE	34
PPP2R2A	0.176	0.802	2.18803	0.0545	0.0520316	1.02955	FALSE	35
IKBKG	0.0185	0.968	5.70941	0.0844	0.0869638	1.02672	FALSE	37
ACSL4	0.0187	0.956	5.6759	0.0877	0.0902637	0.99853	FALSE	40
APC	0.462	0.826	0.838249	0.071	0.0711976	0.947863	FALSE	50
SLC7A6	0.0268	0.486	4.18065	0.0171	0.0115663	0.941288	FALSE	52
KLHL34	0.267	0.885	1.72884	0.0855	0.0880637	0.933855	FALSE	54
ANKRD24	0.139	0.498	1.84106	0.0231	0.0174328	0.8758	FALSE	64
CSTF2	0.0336	0.844	4.65071	0.0913	0.0937969	0.867473	FALSE	66
SUCO	0.212	0.729	1.78185	0.0661	0.0659311	0.860883	FALSE	67
GPRIN3	0.0789	0.452	2.51823	0.0185	0.0128996	0.85402	FALSE	68
RRAGD	0.0913	0.49	2.42409	0.0244	0.0187994	0.84567	FALSE	70
ZIC2	0.00635	0.487	6.26102	0.0239	0.0183661	0.845424	FALSE	71
TAF9B	0.0556	0.793	3.83416	0.0844	0.0869638	0.841105	FALSE	72
EEF1AKMT3	0.102	0.467	2.19485	0.0217	0.0160661	0.837839	FALSE	73
EIF4E2	0.217	0.71	1.71012	0.0673	0.0673978	0.831662	FALSE	76
PRDM7	0.00993	0.42	5.40245	0.0157	0.0105996	0.829378	FALSE	78
HOXA9	0.0308	0.451	3.87213	0.0201	0.0146995	0.826546	FALSE	81
IYD	0.0493	0.412	3.06298	0.0151	0.0101997	0.820463	FALSE	82
TSGA10	0.0656	0.427	2.70247	0.0179	0.0123996	0.814115	FALSE	83
SCAF11	0.0987	0.469	2.24847	0.0249	0.0194994	0.801981	FALSE	84
TOP1MT	0.0314	0.429	3.77214	0.0194	0.0138329	0.797549	FALSE	85
NUP50	0.264	0.697	1.40062	0.073	0.0733976	0.79062	FALSE	86
YAP1	0.137	0.676	2.30285	0.0694	0.0691977	0.784098	FALSE	87
SMIM7	0.236	0.644	1.44827	0.0615	0.060698	0.783636	FALSE	88
MADCAM1	0.0272	0.404	3.89268	0.0181	0.0125996	0.767456	FALSE	90
ENTR1	0.0326	0.398	3.60982	0.0173	0.0117996	0.767397	FALSE	91
NFYA	0.251	0.612	1.28584	0.0582	0.0561981	0.76517	FALSE	92
YLPM1	0.0383	0.397	3.37372	0.0183	0.0127996	0.751443	FALSE	94
PAGR1	0.309	0.771	1.31912	0.103	0.107096	0.748043	FALSE	96
CHST7	0.0333	0.698	4.38963	0.0844	0.0869638	0.740342	FALSE	97
ASB6	0.286	0.594	1.05445	0.0587	0.0567981	0.739926	FALSE	98
NDUFAF1	0.285	0.71	1.31686	0.0884	0.0909636	0.739204	FALSE	99
PIEZO1	0.0676	0.414	2.61454	0.0222	0.0165328	0.737605	FALSE	100
UBE2L5	0.334	0.602	0.849915	0.061	0.059698	0.736872	FALSE	101
ADAM11	0.291	0.576	0.98505	0.055	0.0526316	0.736562	FALSE	102
UBE2Q1	0.121	0.615	2.34558	0.0643	0.0636312	0.735743	FALSE	103
HSD11B1L	0.327	0.628	0.941474	0.0673	0.0673978	0.735611	FALSE	104
FNDC10	0.186	0.625	1.74855	0.0685	0.0685644	0.727438	FALSE	106
ARHGAP9	0.266	0.562	1.07914	0.0535	0.0510316	0.726194	FALSE	107
OR4A47	0.309	0.592	0.93799	0.0615	0.060698	0.720361	FALSE	108
PCED1B	0.227	0.571	1.3308	0.0571	0.0550648	0.718961	FALSE	109
DROSHA	0.432	0.745	0.786209	0.105	0.109396	0.715943	FALSE	110
PARD6B	0.0911	0.608	2.73855	0.0667	0.0666311	0.715204	FALSE	111
RAD23B	0.065	0.414	2.67112	0.0244	0.0187994	0.714505	FALSE	112
RETSAT	0.0465	0.42	3.17509	0.026	0.0205993	0.708182	FALSE	113
KRTAP21-1	0.258	0.545	1.07889	0.053	0.050465	0.70687	FALSE	114
FLT3	0.127	0.457	1.84737	0.0336	0.0291324	0.70178	FALSE	115
EAF1	0.386	0.827	1.09929	0.136	0.143129	0.698214	FALSE	118
SLC35C1	0.138	0.478	1.79234	0.0386	0.0355321	0.692803	FALSE	119
PDCL3	0.165	0.499	1.59657	0.0455	0.0424986	0.684441	FALSE	121
COX18	0.348	0.683	0.972798	0.0979	0.101697	0.67801	FALSE	122
CLUH	0.194	0.557	1.52162	0.062	0.060898	0.676976	FALSE	123
CNOT6L	0.0318	0.435	3.77392	0.0332	0.028699	0.670828	FALSE	124
CFAP97D1	0.177	0.486	1.45721	0.0455	0.0424986	0.66661	FALSE	125
LYRM9	0.0186	0.366	4.29847	0.0208	0.0151328	0.666149	FALSE	126
CRK	0.0788	0.537	2.76865	0.0593	0.0576314	0.665526	FALSE	127
GUCA2A	0.223	0.526	1.23802	0.0571	0.0550648	0.6623	FALSE	128
VMO1	0.0452	0.375	3.0525	0.0234	0.0177661	0.656403	FALSE	129
VPS4A	0.192	0.671	1.80521	0.101	0.105163	0.65633	FALSE	130
ARMC5	0.341	0.734	1.10601	0.122	0.127596	0.656316	FALSE	131
ESCO2	0.142	0.626	2.14027	0.0869	0.089597	0.655864	FALSE	132
PPP1R3E	0.166	0.458	1.46416	0.0401	0.0371654	0.654876	FALSE	133
PBRM1	0.0873	0.518	2.5689	0.0587	0.0567981	0.645255	FALSE	134
CLDND1	0.0563	0.385	2.77365	0.0265	0.021166	0.644629	FALSE	135
THEM5	0.112	0.471	2.07223	0.0464	0.0433319	0.642064	FALSE	136
GGA1	0.0268	0.357	3.73562	0.0219	0.0162661	0.638572	FALSE	137
KLHDC4	0.117	0.415	1.8266	0.0336	0.0291324	0.637284	FALSE	138
STUB1	0.199	0.571	1.52072	0.0756	0.0766308	0.637006	FALSE	139
KDM5C	0.0207	0.646	4.96383	0.0999	0.103963	0.635096	FALSE	140
POLE3	0.318	0.76	1.25697	0.139	0.146195	0.634651	FALSE	141
PUM1	0.264	0.608	1.20353	0.0884	0.0909636	0.633008	FALSE	142
NDUFS2	0.502	0.778	0.632083	0.146	0.154295	0.631463	FALSE	143
DNAH10	0.0968	0.402	2.05412	0.0313	0.0268658	0.631462	FALSE	144
XPOT	0.323	0.638	0.982022	0.0987	0.102763	0.630447	FALSE	145
HIST2H4B	0.108	0.522	2.27302	0.0649	0.0643312	0.622004	FALSE	146
CDC42BPG	0.0527	0.403	2.9349	0.0332	0.028699	0.621479	FALSE	147
ASH1L	0.0893	0.551	2.62532	0.0739	0.0746642	0.620915	FALSE	148
TRAF4	0.0749	0.435	2.53798	0.0405	0.0375987	0.6198	FALSE	149
KMT2B	0.232	0.547	1.23742	0.0732	0.0738309	0.619074	FALSE	150
ENPP7	0.116	0.447	1.94615	0.0447	0.0415986	0.617272	FALSE	151
ARL4A	0.0101	0.321	4.99015	0.0175	0.0119663	0.616975	FALSE	152
ARID4A	0.0152	0.369	4.60148	0.0268	0.0214326	0.615833	FALSE	153
CHAMP1	0.0959	0.544	2.504	0.0743	0.0749308	0.612185	FALSE	154
CIAO2A	0.267	0.521	0.964444	0.0673	0.0673978	0.610276	FALSE	155
OSBPL7	0.167	0.427	1.35439	0.0413	0.0386654	0.603213	FALSE	156
CDC25C	0.134	0.433	1.69213	0.0442	0.0410653	0.600365	FALSE	157
ELF4	0.0784	0.587	2.90443	0.0923	0.0949302	0.600264	FALSE	158
F7	0.0173	0.322	4.21822	0.0193	0.0137662	0.599302	FALSE	159
ACHE	0.145	0.475	1.71187	0.0576	0.0555315	0.596344	FALSE	160
SPOCD1	0.174	0.42	1.2713	0.0409	0.0381654	0.595699	FALSE	161
CRTC2	0.0781	0.493	2.65819	0.0632	0.0624313	0.593867	FALSE	162
AP4S1	0.131	0.386	1.55903	0.0339	0.029399	0.591224	FALSE	163
PARD6G	0.0578	0.354	2.61461	0.0276	0.0221326	0.585859	FALSE	164
PLLP	0.00445	0.295	6.05077	0.0155	0.0104663	0.584161	FALSE	165
FTSJ1	0.0278	0.55	4.30627	0.0844	0.0869638	0.583364	FALSE	166
SEZ6	0.0644	0.358	2.47483	0.0291	0.0237992	0.581191	FALSE	167
ZFR	0.298	0.6	1.00965	0.104	0.10833	0.579151	FALSE	168
LCN8	0.223	0.537	1.26788	0.0818	0.0837639	0.578319	FALSE	169
TESK1	0.207	0.464	1.16449	0.0587	0.0567981	0.577989	FALSE	170
TAF7L	0.139	0.569	2.03334	0.0937	0.0970301	0.57645	FALSE	171
FBXL8	0.0425	0.329	2.95255	0.0234	0.0177661	0.575884	FALSE	172
ZNF469	0.287	0.524	0.868516	0.0776	0.079764	0.575453	FALSE	173
MLX	0.234	0.5	1.09542	0.0717	0.0719643	0.571442	FALSE	174
EFCAB5	0.0736	0.353	2.26189	0.0294	0.0241325	0.570941	FALSE	175
DPY30	0.34	0.63	0.889817	0.119	0.124663	0.569686	FALSE	176
XPR1	0.0405	0.482	3.57304	0.0661	0.0659311	0.569198	FALSE	177
TNRC18	0.0413	0.401	3.27939	0.0421	0.0392987	0.563654	FALSE	178
ARHGEF7	0.453	0.813	0.843744	0.194	0.205126	0.559326	FALSE	179
SPATA31A7	0.254	0.539	1.08546	0.0899	0.0922636	0.557849	FALSE	180
NDUFC2	0.291	0.684	1.23298	0.147	0.154762	0.554271	FALSE	181
ARF1	0.32	0.692	1.1127	0.15	0.158195	0.554159	FALSE	182
VPS37B	0.186	0.602	1.69446	0.116	0.121463	0.551166	FALSE	183
ITGB1	0.0566	0.55	3.28056	0.097	0.100663	0.548421	FALSE	184
C1QTNF5	0.0854	0.35	2.03505	0.0316	0.0271324	0.548279	FALSE	185
MARK2	0.141	0.589	2.06257	0.112	0.117596	0.547539	FALSE	186
MAGEH1	0.0609	0.535	3.13502	0.0923	0.0949302	0.547089	FALSE	187
ULBP3	0.0796	0.469	2.55875	0.0692	0.0691644	0.544095	FALSE	188
SLC30A9	0.1	0.585	2.54844	0.112	0.117596	0.54382	FALSE	189
TMEM82	0.391	0.648	0.728825	0.139	0.146195	0.541123	FALSE	190
E2F1	0.187	0.537	1.52188	0.0953	0.0989967	0.539352	FALSE	191
CDH5	0.276	0.574	1.05638	0.11	0.115429	0.53823	FALSE	192
OR51V1	0.0259	0.281	3.43955	0.0177	0.0121663	0.538071	FALSE	193
WASHC5	0.232	0.553	1.25315	0.103	0.107096	0.536534	FALSE	194
XAGE2	0.0337	0.505	3.90546	0.0844	0.0869638	0.535634	FALSE	195
PEX26	0.192	0.553	1.52617	0.105	0.109396	0.531431	FALSE	196
KHDC4	0.153	0.554	1.85635	0.106	0.11043	0.530131	FALSE	197
TMEM106A	0.0357	0.296	3.0516	0.0219	0.0162661	0.52946	FALSE	198
HNRNPH2	0.0296	0.499	4.07537	0.0844	0.0869638	0.52927	FALSE	199
ST20	0.259	0.53	1.03304	0.097	0.100663	0.528478	FALSE	200
C16orf96	0.0637	0.372	2.54594	0.0413	0.0386654	0.525516	FALSE	201
KCND1	0.0201	0.497	4.62798	0.0855	0.0880637	0.524436	FALSE	202
C1orf127	0.152	0.384	1.33703	0.0464	0.0433319	0.523466	FALSE	203
COMMD8	0.263	0.544	1.04854	0.105	0.109396	0.522782	FALSE	204
TEAD1	0.0595	0.534	3.16588	0.101	0.105163	0.522325	FALSE	205
ELF2	0.0834	0.375	2.16877	0.0438	0.040632	0.521675	FALSE	206
COX4I2	0.0698	0.361	2.3707	0.0394	0.0363988	0.519448	FALSE	207
ARSA	0.223	0.468	1.06946	0.0763	0.0777974	0.519028	FALSE	208
RABL2B	0.0851	0.488	2.51965	0.0839	0.0864305	0.518907	FALSE	209
UBFD1	0.192	0.518	1.43185	0.0962	0.0997967	0.518458	FALSE	210
MFSD13A	0.119	0.415	1.80215	0.0593	0.0576314	0.514326	FALSE	211
VAV2	0.0503	0.351	2.80284	0.0378	0.0344989	0.513231	FALSE	212
HOXB6	0.0522	0.298	2.51319	0.0246	0.019166	0.511805	FALSE	213
HAP1	0.125	0.398	1.67084	0.0545	0.0520316	0.510926	FALSE	214
FRG1	0.31	0.561	0.855733	0.118	0.123529	0.509517	FALSE	215
PROS1	0.0144	0.279	4.27612	0.0208	0.0151328	0.507802	FALSE	216
IGFLR1	0.0828	0.355	2.10012	0.0405	0.0375987	0.505813	FALSE	217
SEBOX	0.163	0.404	1.30948	0.0582	0.0561981	0.505112	FALSE	218
ADAR	0.279	0.675	1.27462	0.17	0.179161	0.504061	FALSE	219
RNH1	0.0819	0.427	2.3823	0.0667	0.0666311	0.50229	FALSE	220
PTPN1	0.164	0.523	1.67312	0.106	0.11043	0.500466	FALSE	221
SGCA	0.103	0.359	1.80134	0.0438	0.040632	0.499416	FALSE	222
NSMF	0.0704	0.331	2.23318	0.036	0.0319989	0.4948	FALSE	223
SBSN	0.0289	0.404	3.80521	0.0609	0.059698	0.494512	FALSE	224
DNAJB1	0.237	0.482	1.02415	0.093	0.0959635	0.490625	FALSE	225
DLG5	0.203	0.546	1.42742	0.121	0.126396	0.490454	FALSE	226
KRAS	0.38	0.719	0.919992	0.197	0.207993	0.490323	FALSE	227
HBM	0.0122	0.248	4.34539	0.0158	0.010733	0.488381	FALSE	228
DEFB115	0.0605	0.321	2.40757	0.0346	0.0303657	0.487155	FALSE	229
THUMPD2	0.0391	0.331	3.08159	0.0376	0.0342322	0.485102	FALSE	230
IGFBP7	0.0905	0.342	1.91801	0.0409	0.0381654	0.485069	FALSE	231
ELMO2	0.242	0.695	1.52201	0.19	0.201193	0.483989	FALSE	232
TMEM201	0.101	0.413	2.03179	0.0685	0.0685644	0.480691	FALSE	233
ZDHHC11B	0.016	0.251	3.97154	0.0179	0.0123996	0.478555	FALSE	234
ATP2C1	0.0475	0.484	3.34901	0.0995	0.103097	0.47759	FALSE	235
KLF5	0.0722	0.571	2.98342	0.139	0.146195	0.476823	FALSE	236
USP14	0.0277	0.414	3.90167	0.071	0.0711976	0.475079	FALSE	237
DACT3	0.118	0.357	1.59714	0.0501	0.0469318	0.474286	FALSE	238
BORCS8	0.263	0.546	1.05384	0.13	0.135962	0.473154	FALSE	239
PIGT	0.0949	0.378	1.99391	0.0582	0.0561981	0.472605	FALSE	240
ZBTB45	0.136	0.409	1.58849	0.0704	0.070331	0.471517	FALSE	241
DLG4	0.116	0.369	1.6695	0.0555	0.0533649	0.469643	FALSE	242
POMK	0.016	0.275	4.10329	0.0252	0.019666	0.469228	FALSE	243
SHARPIN	0.0762	0.366	2.26398	0.055	0.0526316	0.468024	FALSE	244
VWA8	0.111	0.35	1.6568	0.0496	0.0465984	0.46607	FALSE	245
UPK3BL2	0.0719	0.339	2.23722	0.0455	0.0424986	0.464981	FALSE	246
TMEM190	0.0853	0.321	1.91196	0.039	0.0357988	0.464208	FALSE	247
ZMYM3	0.113	0.519	2.19941	0.123	0.128229	0.462955	FALSE	248
XK	0.00685	0.435	5.98877	0.0844	0.0869638	0.461388	FALSE	249
COMMD2	0.0515	0.363	2.81733	0.0561	0.0538982	0.460439	FALSE	250
IL1R1	0.00356	0.297	6.38244	0.0326	0.0282324	0.460128	FALSE	251
LRFN3	0.023	0.258	3.48767	0.0224	0.0166661	0.458767	FALSE	252
LCMT1	0.466	0.73	0.647567	0.226	0.237825	0.455331	FALSE	253
CRLF3	0.034	0.338	3.31342	0.0482	0.0450652	0.455002	FALSE	254
WASHC3	0.362	0.594	0.714473	0.163	0.171528	0.454806	FALSE	255
FKBP8	0.146	0.367	1.32981	0.0598	0.0581981	0.453279	FALSE	256
SNX32	0.19	0.426	1.16485	0.0839	0.0864305	0.45298	FALSE	257
PIAS3	0.0995	0.326	1.7121	0.0442	0.0410653	0.452007	FALSE	258
ACAA2	0.0208	0.236	3.50413	0.0177	0.0121663	0.451903	FALSE	259
PIGL	0.0939	0.327	1.80009	0.0447	0.0415986	0.451561	FALSE	260
ALKBH3	0.0128	0.247	4.2703	0.0207	0.0149995	0.450509	FALSE	261
COG7	0.326	0.672	1.04359	0.203	0.214193	0.449699	FALSE	262
MT1F	0.0361	0.253	2.80907	0.0226	0.0169328	0.448132	FALSE	263
FANCM	0.245	0.606	1.30654	0.173	0.182694	0.447395	FALSE	264
HLCS	0.0313	0.264	3.0763	0.0262	0.0209326	0.443302	FALSE	265
CCDC107	0.157	0.489	1.63907	0.12	0.125596	0.440601	FALSE	266
NEMP2	0.0329	0.251	2.93153	0.0234	0.0177661	0.439353	FALSE	267
SCML2	0.0451	0.419	3.21575	0.0878	0.090297	0.437573	FALSE	268
SYT12	0.103	0.462	2.16525	0.108	0.113096	0.437307	FALSE	269
LRP4	0.127	0.351	1.46664	0.0587	0.0567981	0.437229	FALSE	270
TSPAN31	0.189	0.419	1.14856	0.0884	0.0909636	0.436234	FALSE	271
FGFR1OP2	0.244	0.509	1.06078	0.134	0.140129	0.434418	FALSE	272
CCDC22	0.219	0.628	1.51983	0.192	0.20356	0.434141	FALSE	273
RANBP1	0.159	0.595	1.90386	0.177	0.186494	0.433955	FALSE	274
CSF3R	0.0603	0.379	2.65197	0.0717	0.0719643	0.433153	FALSE	275
APLP1	0.0682	0.336	2.30062	0.054	0.0515983	0.432555	FALSE	276
MTRNR2L10	0.104	0.425	2.03088	0.0935	0.0966634	0.431264	FALSE	277
ACOXL	0.0659	0.306	2.21518	0.0421	0.0392987	0.43012	FALSE	278
CLDN6	0.127	0.343	1.43338	0.0582	0.0561981	0.428845	FALSE	279
RNASE10	0.0201	0.235	3.54739	0.0208	0.0151328	0.427719	FALSE	280
BHLHA15	0.25	0.465	0.895303	0.117	0.122496	0.424023	FALSE	281
AP1G2	0.309	0.553	0.839673	0.163	0.171528	0.423413	FALSE	282
NUDT17	0.143	0.434	1.60168	0.102	0.10603	0.422964	FALSE	283
ESRRA	0.254	0.59	1.21589	0.183	0.192994	0.42153	FALSE	284
CT45A7	0.341	0.633	0.892434	0.205	0.216126	0.42113	FALSE	285
NHS	0.0335	0.414	3.6274	0.0935	0.0966634	0.420101	FALSE	286
DEFB118	0.0501	0.314	2.64788	0.0496	0.0465984	0.418131	FALSE	287
MAGIX	0.00751	0.396	5.72054	0.0855	0.0880637	0.41786	FALSE	288
TAF1A	0.439	0.656	0.579475	0.22	0.231459	0.416905	FALSE	289
MYO6	0.017	0.269	3.984	0.0329	0.0284324	0.415924	FALSE	290
PDK3	0.0565	0.417	2.88372	0.0972	0.100797	0.415563	FALSE	291
B3GNT6	0.046	0.263	2.51536	0.0309	0.0263325	0.415411	FALSE	292
RNF31	0.0577	0.479	3.05338	0.13	0.135962	0.415093	FALSE	293
UAP1	0.208	0.528	1.34395	0.156	0.164328	0.414104	FALSE	294
GJD4	0.154	0.383	1.31441	0.0811	0.0830306	0.413932	FALSE	295
MGA	0.173	0.413	1.25537	0.0961	0.0997633	0.413425	FALSE	296
MUS81	0.291	0.509	0.806647	0.146	0.154295	0.413129	FALSE	297
ADAMTSL4	0.0371	0.274	2.88468	0.0353	0.0311323	0.41286	FALSE	298
ITGB3	0.0566	0.318	2.49015	0.053	0.050465	0.412449	FALSE	299
GGCX	0.156	0.343	1.13666	0.0638	0.0629979	0.411831	FALSE	300
C16orf95	0.0808	0.411	2.34671	0.0962	0.0997967	0.411363	FALSE	301
TMEM208	0.201	0.477	1.24679	0.131	0.137329	0.411288	FALSE	302
C14orf28	0.0241	0.235	3.28556	0.0236	0.0179327	0.410393	FALSE	303
POMP	0.157	0.444	1.4998	0.114	0.119429	0.409763	FALSE	304
OGFR	0.347	0.563	0.698199	0.178	0.188094	0.408527	FALSE	305
MT1B	0.0368	0.269	2.86983	0.0346	0.0303657	0.408239	FALSE	306
FAM83D	0.00734	0.31	5.40034	0.0515	0.0486984	0.406871	FALSE	307
IQGAP3	0.0696	0.356	2.35472	0.0723	0.0728642	0.404945	FALSE	308
SEMA3F	0.194	0.437	1.17158	0.113	0.118529	0.404738	FALSE	309
LZTFL1	0.0469	0.255	2.44284	0.0309	0.0263325	0.402775	FALSE	310
GABRR2	0.0229	0.296	3.69218	0.0473	0.0441652	0.401056	FALSE	311
TM9SF2	0.21	0.485	1.2076	0.143	0.150595	0.398762	FALSE	312
PROCA1	0.295	0.518	0.812237	0.162	0.170294	0.398238	FALSE	313
HRK	0.0936	0.309	1.72303	0.0545	0.0520316	0.396673	FALSE	314
KYAT1	0.02	0.209	3.38543	0.0185	0.0128996	0.39489	FALSE	315
GNG8	0.0102	0.207	4.34299	0.0179	0.0123996	0.394665	FALSE	316
INHBE	0.117	0.419	1.84044	0.11	0.115429	0.392889	FALSE	317
AR	0.0115	0.372	5.0156	0.0855	0.0880637	0.392535	FALSE	318
DACH2	0.02	0.375	4.22882	0.0877	0.0902637	0.391683	FALSE	319
WDR73	0.643	0.81	0.333103	0.314	0.328822	0.391261	FALSE	320
KRTAP9-2	0.154	0.362	1.23306	0.0811	0.0830306	0.391236	FALSE	321
GRHPR	0.0475	0.28	2.55943	0.0434	0.040132	0.391023	FALSE	322
PQBP1	0.0827	0.451	2.44717	0.13	0.135962	0.390828	FALSE	323
ADORA2B	0.0301	0.274	3.18634	0.0409	0.0381654	0.388622	FALSE	324
MMAB	0.184	0.383	1.05764	0.0938	0.0971301	0.387843	FALSE	325
EIF4EBP1	0.251	0.573	1.19085	0.2	0.211226	0.386919	FALSE	326
ACSL3	0.293	0.642	1.13167	0.238	0.249858	0.386681	FALSE	327
DIP2B	0.0889	0.391	2.13691	0.0995	0.103097	0.385822	FALSE	328
MERTK	0.0453	0.249	2.45856	0.0326	0.0282324	0.385764	FALSE	329
TMCO3	0.188	0.384	1.03037	0.0962	0.0997967	0.384339	FALSE	330
PRKG2	0.0157	0.209	3.73467	0.0199	0.0145328	0.384069	FALSE	331
SETD5	0.315	0.579	0.878212	0.207	0.217826	0.383234	FALSE	332
ERCC6L	0.21	0.563	1.42275	0.198	0.208593	0.383234	FALSE	333
EID2B	0.0828	0.291	1.81332	0.051	0.0482651	0.383063	FALSE	334
AIF1	0.117	0.297	1.34395	0.054	0.0515983	0.382347	FALSE	335
UBE4B	0.319	0.552	0.791112	0.193	0.204293	0.38074	FALSE	336
HMGB3	0.195	0.495	1.34395	0.162	0.170294	0.380556	FALSE	337
ARNTL2	0.0297	0.284	3.25736	0.0487	0.0457318	0.380498	FALSE	338
ANKRD39	0.0596	0.328	2.46031	0.0698	0.0698643	0.379084	FALSE	339
HOXA7	0.0472	0.319	2.7567	0.0661	0.0659311	0.37671	FALSE	340
FAM83E	0.142	0.368	1.37381	0.0922	0.0947302	0.376652	FALSE	341
SMARCA2	0.000889	0.456	9.00263	0.143	0.150595	0.374918	FALSE	342
SLN	0.00563	0.21	5.22111	0.0222	0.0165328	0.374147	FALSE	343
PRRG1	0.00852	0.357	5.38893	0.0877	0.0902637	0.372882	FALSE	344
ATG101	0.0415	0.404	3.28317	0.114	0.119429	0.372847	FALSE	345
SP110	0.00556	0.247	5.47328	0.0354	0.0311656	0.372062	FALSE	346
CYB5R4	0.42	0.659	0.649889	0.261	0.272858	0.371718	FALSE	347
FZR1	0.098	0.445	2.18295	0.139	0.146195	0.371605	FALSE	348
OR2S2	0.0512	0.319	2.63934	0.0704	0.070331	0.36776	FALSE	349
RAB21	0.0471	0.285	2.59716	0.054	0.0515983	0.366899	FALSE	350
PYGM	0.218	0.421	0.949492	0.129	0.134696	0.366542	FALSE	351
ARL9	0.0203	0.192	3.24155	0.0187	0.0131662	0.361063	FALSE	352
OR2J1	0.117	0.365	1.64139	0.0995	0.103097	0.360166	FALSE	353
PCMT1	0.101	0.312	1.62719	0.0704	0.070331	0.35969	FALSE	354
UCK1	0.122	0.366	1.58496	0.102	0.10603	0.356693	FALSE	355
COMMD10	0.0347	0.228	2.71603	0.0319	0.0274324	0.356076	FALSE	356
COPS9	0.302	0.511	0.758775	0.191	0.20236	0.35457	FALSE	357
SBK1	0.113	0.329	1.54176	0.0818	0.0837639	0.354314	FALSE	358
NUDT11	0.0179	0.343	4.26018	0.0912	0.0937969	0.352539	FALSE	359
ACACA	0.268	0.564	1.07346	0.226	0.237825	0.35179	FALSE	360
SLC25A1	0.193	0.58	1.58745	0.236	0.247958	0.35126	FALSE	361
SHISAL2B	0.0466	0.226	2.27792	0.0326	0.0282324	0.350131	FALSE	362
UQCR10	0.192	0.485	1.33688	0.182	0.192494	0.347058	FALSE	363
TM6SF2	0.105	0.289	1.46068	0.0638	0.0629979	0.346995	FALSE	364
ZDHHC7	0.204	0.455	1.1573	0.164	0.172894	0.34681	FALSE	365
CYP2F1	0.0167	0.198	3.56758	0.0234	0.0177661	0.346581	FALSE	366
OVGP1	0.233	0.425	0.867133	0.145	0.152995	0.346512	FALSE	367
GPR173	0.00531	0.328	5.94884	0.0866	0.0891637	0.344338	FALSE	368
CNOT7	0.025	0.276	3.46467	0.0587	0.0567981	0.343804	FALSE	369
IDH3A	0.234	0.581	1.31203	0.247	0.257691	0.342151	FALSE	370
CAPG	0.0161	0.205	3.67049	0.0271	0.0216326	0.341303	FALSE	371
STIM1	0.058	0.292	2.33184	0.0685	0.0685644	0.339859	FALSE	372
FAM9C	0.00449	0.32	6.15521	0.0844	0.0869638	0.339412	FALSE	373
RABL6	0.0259	0.226	3.1253	0.0356	0.0315323	0.339281	FALSE	374
PYDC1	0.0742	0.252	1.76393	0.0482	0.0450652	0.339232	FALSE	375
GFPT1	0.307	0.674	1.13451	0.299	0.313856	0.339203	FALSE	376
SPATA2L	0.0262	0.207	2.98199	0.0285	0.0231992	0.338347	FALSE	377
ALG6	0.219	0.452	1.04539	0.17	0.179161	0.337534	FALSE	378
GSC2	0.0955	0.336	1.81489	0.0962	0.0997967	0.336297	FALSE	379
EBP	0.0078	0.317	5.34486	0.0855	0.0880637	0.334499	FALSE	380
KNG1	0.107	0.301	1.49215	0.0763	0.0777974	0.333819	FALSE	381
MYBPC2	0.0121	0.188	3.95765	0.0226	0.0169328	0.332999	FALSE	382
BTBD9	0.207	0.484	1.22538	0.194	0.205126	0.332981	FALSE	383
ABHD13	0.183	0.372	1.02346	0.122	0.127596	0.332629	FALSE	384
TMEM183A	0.158	0.336	1.08854	0.0995	0.103097	0.33155	FALSE	385
NUPL2	0.0263	0.284	3.43276	0.0685	0.0685644	0.330548	FALSE	386
KCNG4	0.0354	0.359	3.34216	0.115	0.120563	0.329845	FALSE	387
KIF22	0.319	0.555	0.798931	0.244	0.254725	0.32963	FALSE	388
HMGXB3	0.0344	0.255	2.89002	0.0535	0.0510316	0.329501	FALSE	389
RHBDF1	0.215	0.454	1.07836	0.178	0.188094	0.329434	FALSE	390
NDUFA5	0.319	0.602	0.916207	0.271	0.284357	0.328774	FALSE	391
ZDHHC22	0.16	0.377	1.23649	0.129	0.134696	0.328234	FALSE	392
CLIC1	0.0177	0.27	3.93114	0.062	0.060898	0.328157	FALSE	393
TTLL11	0.147	0.402	1.45138	0.145	0.152995	0.32776	FALSE	394
MRPL46	0.437	0.668	0.612215	0.308	0.323189	0.327683	FALSE	395
LCN15	0.0756	0.258	1.77091	0.0561	0.0538982	0.327254	FALSE	396
IGLON5	0.0536	0.256	2.25584	0.0555	0.0533649	0.325823	FALSE	397
OLIG3	0.0894	0.249	1.4778	0.052	0.049165	0.325778	FALSE	398
ZNF383	0.151	0.38	1.33145	0.134	0.140129	0.32432	FALSE	399
SIGMAR1	0.126	0.298	1.24189	0.0811	0.0830306	0.322067	FALSE	400
GPATCH3	0.149	0.305	1.0335	0.0854	0.0880304	0.321887	FALSE	401
SCG5	0.058	0.31	2.41814	0.0892	0.0915636	0.321866	FALSE	402
USP38	0.0335	0.231	2.78566	0.0438	0.040632	0.321351	FALSE	403
KLK9	0.0596	0.259	2.11957	0.0593	0.0576314	0.320989	FALSE	404
FAM222B	0.0224	0.19	3.08443	0.026	0.0205993	0.320368	FALSE	405
HEPH	0.00396	0.301	6.24812	0.0844	0.0869638	0.319259	FALSE	406
IL1RAPL2	0.00707	0.3	5.40711	0.0844	0.0869638	0.318198	FALSE	407
GFAP	0.0796	0.292	1.87513	0.0797	0.0816639	0.317687	FALSE	408
SCRN2	0.266	0.477	0.842563	0.205	0.216126	0.317345	FALSE	409
CCDC8	0.0262	0.2	2.93236	0.0306	0.0258991	0.317343	FALSE	410
NR2C2	0.041	0.251	2.61399	0.0566	0.0544315	0.317302	FALSE	411
TMEM54	0.0337	0.209	2.63268	0.0346	0.0303657	0.317182	FALSE	412
TMEM242	0.223	0.465	1.06019	0.197	0.207993	0.317107	FALSE	413
RBMS1	0.0107	0.247	4.52883	0.0545	0.0520316	0.317082	FALSE	414
AMZ1	0.0389	0.205	2.39778	0.0329	0.0284324	0.316968	FALSE	415
PAXIP1	0.178	0.579	1.70169	0.271	0.284357	0.316213	FALSE	416
PSD4	0.103	0.299	1.5375	0.0854	0.0880304	0.315555	FALSE	417
SUV39H1	0.0368	0.333	3.17774	0.108	0.113096	0.315202	FALSE	418
COQ9	0.0354	0.223	2.65522	0.0413	0.0386654	0.315027	FALSE	419
GSDMB	0.0905	0.283	1.64481	0.0763	0.0777974	0.313857	FALSE	420
NDUFC1	0.133	0.397	1.57771	0.154	0.162195	0.313616	FALSE	421
TDG	0.0328	0.231	2.81613	0.0472	0.0440985	0.313138	FALSE	422
TUBB4A	0.143	0.331	1.21082	0.109	0.113996	0.312169	FALSE	423
CCDC61	0.0276	0.27	3.29022	0.0698	0.0698643	0.312051	FALSE	424
PRKACG	0.0834	0.412	2.30453	0.166	0.174894	0.311977	FALSE	425
SPOP	0.0147	0.229	3.96146	0.0469	0.0436319	0.311485	FALSE	426
TUBB4B	0.0854	0.511	2.58102	0.234	0.245992	0.31124	FALSE	427
ALG5	0.144	0.408	1.5025	0.164	0.172894	0.310986	FALSE	428
YPEL3	0.226	0.455	1.00954	0.198	0.208593	0.309719	FALSE	429
2023-09-11	0.0383	0.207	2.43421	0.036	0.0319989	0.309437	FALSE	430
RHNO1	0.012	0.199	4.05166	0.0322	0.0278657	0.309431	FALSE	431
PRODH2	0.307	0.477	0.635751	0.213	0.224659	0.309323	FALSE	432
KCND3	0.0969	0.316	1.70536	0.101	0.105163	0.309091	FALSE	433
STT3B	0.314	0.531	0.757947	0.251	0.262025	0.30886	FALSE	434
DPF2	0.357	0.588	0.719892	0.284	0.298357	0.308855	FALSE	435
BDH2	0.0869	0.267	1.61941	0.0698	0.0698643	0.308584	FALSE	436
ATXN7L3	0.479	0.663	0.468983	0.327	0.342455	0.308558	FALSE	437
FADD	0.0863	0.423	2.29323	0.177	0.186494	0.308509	FALSE	438
HMGN1	0.0629	0.321	2.35144	0.105	0.109396	0.30848	FALSE	439
ANKRD23	0.0807	0.307	1.9276	0.0954	0.09903	0.3083	FALSE	440
GANAB	0.154	0.395	1.35892	0.158	0.166428	0.307616	FALSE	441
SPNS2	0.0486	0.295	2.60169	0.0884	0.0909636	0.307134	FALSE	442
RALY	0.0428	0.264	2.62486	0.0692	0.0691644	0.306271	FALSE	443
GOLGA6L6	0.366	0.533	0.542292	0.256	0.267424	0.305302	FALSE	444
SPIN4	0.000816	0.287	8.45827	0.0844	0.0869638	0.30441	FALSE	445
HIST1H3H	0.0933	0.266	1.51148	0.0717	0.0719643	0.304007	FALSE	446
MTHFD2L	0.0934	0.384	2.03961	0.154	0.162195	0.303346	FALSE	447
DIAPH1	0.0389	0.34	3.12769	0.123	0.128229	0.303285	FALSE	448
COMT	0.116	0.304	1.38995	0.097	0.100663	0.303127	FALSE	449
IL12RB1	0.0233	0.235	3.33426	0.054	0.0515983	0.302531	FALSE	450
OR4K13	0.0373	0.193	2.37135	0.0316	0.0271324	0.302337	FALSE	451
JUND	0.103	0.317	1.62184	0.107	0.111496	0.302018	FALSE	452
SULT1E1	0.0246	0.198	3.00877	0.0342	0.0299323	0.301724	FALSE	453
AP3M2	0.103	0.268	1.37959	0.0743	0.0749308	0.301591	FALSE	454
NAXE	0.0665	0.223	1.74562	0.0478	0.0447652	0.30084	FALSE	455
ARNTL	0.0493	0.255	2.37084	0.0667	0.0666311	0.299962	FALSE	456
ISYNA1	0.252	0.424	0.750641	0.186	0.196193	0.299902	FALSE	457
ZNF730	0.0306	0.199	2.70116	0.0356	0.0315323	0.298748	FALSE	458
IMPG2	0.0225	0.179	2.99196	0.0274	0.0218993	0.297063	FALSE	459
MDH2	0.108	0.341	1.65874	0.129	0.134696	0.296891	FALSE	460
GJD3	0.0879	0.449	2.35278	0.208	0.219226	0.295939	FALSE	461
CRTC3	0.0558	0.334	2.58151	0.128	0.133562	0.292022	FALSE	462
HSF4	0.0505	0.251	2.31333	0.0692	0.0691644	0.29119	FALSE	463
SFTPB	0.141	0.303	1.10362	0.105	0.109396	0.291182	FALSE	464
BOLA2	0.413	0.58	0.489911	0.301	0.316023	0.290163	FALSE	465
VSIG10L	0.0806	0.421	2.38497	0.194	0.205126	0.289639	FALSE	466
METRN	0.0333	0.205	2.62203	0.0413	0.0386654	0.289599	FALSE	467
ALG12	0.274	0.471	0.781551	0.231	0.243192	0.289218	FALSE	468
TENT4A	0.00415	0.164	5.30444	0.0229	0.0173328	0.288826	FALSE	469
FKRP	0.018	0.209	3.53743	0.0447	0.0415986	0.288613	FALSE	470
ODF3B	0.00986	0.204	4.37084	0.0413	0.0386654	0.288186	FALSE	471
ZC3H13	0.271	0.504	0.895131	0.257	0.268491	0.287819	FALSE	472
SPTAN1	0.107	0.295	1.4631	0.102	0.10603	0.287499	FALSE	473
SLC46A2	0.0336	0.279	3.05373	0.0915	0.0940302	0.286458	FALSE	474
TMEM167A	0.346	0.566	0.71003	0.297	0.311956	0.286343	FALSE	475
C19orf47	0.0465	0.205	2.14032	0.0434	0.040132	0.286284	FALSE	476
WDR6	0.0912	0.287	1.65395	0.0979	0.101697	0.284903	FALSE	477
LEP	0.0398	0.186	2.22446	0.0339	0.029399	0.28489	FALSE	478
E2F3	0.26	0.533	1.03562	0.278	0.29209	0.284879	FALSE	479
WASHC4	0.128	0.373	1.54303	0.164	0.172894	0.284308	FALSE	480
HABP4	0.0231	0.186	3.00934	0.0342	0.0299323	0.283438	FALSE	481
TRIM43	0.0687	0.254	1.88645	0.0756	0.0766308	0.283362	FALSE	482
PIWIL3	0.113	0.307	1.44192	0.114	0.119429	0.283327	FALSE	483
TMEM141	0.0291	0.187	2.68395	0.0349	0.030699	0.282908	FALSE	484
RABAC1	0.0626	0.227	1.85846	0.0587	0.0567981	0.282766	FALSE	485
PTPRU	0.185	0.389	1.07224	0.178	0.188094	0.282268	FALSE	486
PGM5	0.231	0.452	0.96843	0.226	0.237825	0.281931	FALSE	487
CLDN7	0.0686	0.271	1.98201	0.0892	0.0915636	0.281373	FALSE	488
ARMCX2	0.013	0.268	4.36565	0.0866	0.0891637	0.28135	FALSE	489
BLOC1S3	0.182	0.356	0.967939	0.154	0.162195	0.281227	FALSE	490
NAP1L4	0.0701	0.242	1.78752	0.0694	0.0691977	0.280698	FALSE	491
RGPD4	0.136	0.299	1.13654	0.11	0.115429	0.280367	FALSE	492
UNC119	0.107	0.432	2.01342	0.213	0.224659	0.280142	FALSE	493
TMEM214	0.0393	0.237	2.59229	0.0661	0.0659311	0.279876	FALSE	494
FDX1	0.376	0.57	0.600229	0.308	0.323189	0.27961	FALSE	495
ATP8B1	0.00151	0.162	6.7453	0.0244	0.0187994	0.279589	FALSE	496
IER5L	0.00706	0.331	5.55102	0.136	0.143129	0.279455	FALSE	497
TEX101	0.143	0.304	1.08806	0.115	0.120563	0.279311	FALSE	498
PHF10	0.0703	0.279	1.98867	0.0961	0.0997633	0.279287	FALSE	499
NUMB	0.0338	0.206	2.60755	0.0473	0.0441652	0.279113	FALSE	500
HIST1H3A	0.268	0.439	0.711988	0.22	0.231459	0.278996	FALSE	501
POLM	0.038	0.197	2.37412	0.0413	0.0386654	0.278298	FALSE	502
IL36A	0.13	0.292	1.16746	0.107	0.111496	0.2782	FALSE	503
IL34	0.0974	0.318	1.70703	0.128	0.133562	0.278033	FALSE	504
F3	0.25	0.43	0.782409	0.214	0.226026	0.277712	FALSE	505
FAM76B	0.0412	0.221	2.42333	0.0582	0.0561981	0.276311	FALSE	506
PHF3	0.0145	0.168	3.53434	0.0282	0.0226992	0.27619	FALSE	507
DRP2	0.0146	0.264	4.1765	0.0877	0.0902637	0.275745	FALSE	508
TALDO1	0.00938	0.421	5.48809	0.211	0.222893	0.274452	FALSE	509
TAF11	0.0653	0.297	2.18531	0.114	0.119429	0.274098	FALSE	510
RRAGB	0.00932	0.259	4.79648	0.0866	0.0891637	0.271901	FALSE	511
RHBDL1	0.0984	0.456	2.2123	0.242	0.253425	0.271845	FALSE	512
TSSK4	0.28	0.431	0.622261	0.222	0.234126	0.271768	FALSE	513
RSU1	0.151	0.467	1.62887	0.251	0.262025	0.271634	FALSE	514
DCAF4	0.224	0.367	0.712281	0.173	0.182694	0.270947	FALSE	515
MAFK	0.123	0.328	1.41504	0.142	0.149262	0.270945	FALSE	516
OTUD3	0.0322	0.247	2.93938	0.0783	0.0802973	0.270539	FALSE	517
ZNF706	0.00722	0.149	4.36717	0.021	0.0153328	0.270342	FALSE	518
PHIP	0.0391	0.247	2.65927	0.0787	0.0807973	0.269873	FALSE	519
EPPIN	0.0587	0.203	1.79005	0.0501	0.0469318	0.269692	FALSE	520
GPI	0.458	0.634	0.469135	0.361	0.375587	0.269633	FALSE	521
ZNF81	0.00787	0.255	5.01799	0.0855	0.0880637	0.269077	FALSE	522
JAML	0.0289	0.181	2.64685	0.0364	0.0328322	0.26855	FALSE	523
DBX2	0.0317	0.202	2.6718	0.0501	0.0469318	0.268364	FALSE	524
CTDNEP1	0.47	0.635	0.434096	0.363	0.377921	0.268351	FALSE	525
TEX29	0.118	0.359	1.6052	0.17	0.179161	0.268086	FALSE	526
TNPO1	0.21	0.445	1.08342	0.238	0.249858	0.268026	FALSE	527
NFX1	0.0163	0.155	3.24932	0.0243	0.018666	0.267987	FALSE	528
ZNHIT1	0.366	0.56	0.613583	0.318	0.333222	0.267269	FALSE	529
MIEF1	0.0334	0.203	2.60356	0.051	0.0482651	0.267223	FALSE	530
DDA1	0.307	0.529	0.785029	0.299	0.313856	0.266229	FALSE	531
C1orf100	0.178	0.31	0.800391	0.132	0.138529	0.266123	FALSE	532
LMF1	0.0173	0.172	3.31356	0.0329	0.0284324	0.265944	FALSE	533
IDH1	0.0569	0.29	2.34955	0.116	0.121463	0.265512	FALSE	534
PHKA1	0.0216	0.255	3.56139	0.0888	0.091197	0.265205	FALSE	535
VWA1	0.147	0.406	1.46566	0.211	0.222893	0.264673	FALSE	536
PLAA	0.0127	0.268	4.39933	0.0995	0.103097	0.264451	FALSE	537
SCGB2A1	0.129	0.331	1.35946	0.151	0.158995	0.264342	FALSE	538
OSCAR	0.0299	0.189	2.66017	0.043	0.0399653	0.264282	FALSE	539
XAGE5	0.0485	0.272	2.48755	0.103	0.107096	0.263901	FALSE	540
C8orf59	0.209	0.416	0.993081	0.223	0.234692	0.261873	FALSE	541
SHROOM4	0.00471	0.248	5.71847	0.0855	0.0880637	0.26169	FALSE	542
JUN	0.165	0.436	1.40186	0.239	0.251192	0.261598	FALSE	543
WNT11	0.0279	0.173	2.63244	0.0353	0.0311323	0.260674	FALSE	544
PDGFRA	0.108	0.287	1.41002	0.118	0.123529	0.260662	FALSE	545
TNFAIP3	0.00232	0.416	7.48631	0.225	0.236592	0.260416	FALSE	546
YPEL4	0.0804	0.262	1.7043	0.0979	0.101697	0.260086	FALSE	547
FGD1	0.0237	0.268	3.49927	0.103	0.107096	0.26002	FALSE	548
ZNF185	0.266	0.472	0.827361	0.27	0.282757	0.258933	FALSE	549
FOXR2	0.0221	0.276	3.64255	0.11	0.115429	0.258801	FALSE	550
RFX5	0.207	0.419	1.01732	0.229	0.241292	0.258715	FALSE	551
SHBG	0.0386	0.223	2.53037	0.0692	0.0691644	0.258706	FALSE	552
TMEM174	0.0654	0.277	2.08252	0.111	0.116529	0.258597	FALSE	553
NCCRP1	0.0146	0.163	3.48083	0.0309	0.0263325	0.25746	FALSE	554
SPATS1	0.0804	0.266	1.72616	0.104	0.10833	0.256757	FALSE	555
PCMTD2	0.107	0.267	1.31923	0.105	0.109396	0.256586	FALSE	556
WDR87	0.0356	0.269	2.91766	0.107	0.111496	0.256287	FALSE	557
KHDC3L	0.0383	0.202	2.39894	0.0561	0.0538982	0.256222	FALSE	558
SPACA3	0.0284	0.17	2.58157	0.0353	0.0311323	0.256154	FALSE	559
ZNF695	0.11	0.268	1.28473	0.107	0.111496	0.255334	FALSE	560
VAMP8	0.0487	0.292	2.58397	0.128	0.133562	0.2553	FALSE	561
STAG2	0.304	0.754	1.31049	0.447	0.459218	0.254838	FALSE	562
FBXO36	0.112	0.239	1.09351	0.0839	0.0864305	0.254137	FALSE	563
CENPV	0.0331	0.177	2.41885	0.0399	0.0369321	0.253569	FALSE	564
MCIDAS	0.0257	0.157	2.61092	0.0297	0.0245658	0.252718	FALSE	565
BAG6	0.0824	0.317	1.94377	0.152	0.159628	0.252614	FALSE	566
VMA21	0.317	0.632	0.995442	0.384	0.39862	0.252447	FALSE	567
SYCE1L	0.0195	0.154	2.98138	0.0285	0.0231992	0.251717	FALSE	568
ECT2L	0.302	0.466	0.625781	0.275	0.288524	0.251555	FALSE	569
UCHL1	0.0238	0.156	2.71251	0.0297	0.0245658	0.251108	FALSE	570
NDUFAF4	0.152	0.402	1.40312	0.226	0.237825	0.250744	FALSE	571
SLC25A48	0.162	0.328	1.0177	0.164	0.172894	0.250008	FALSE	572
SP7	0.0813	0.244	1.58555	0.0922	0.0947302	0.249737	FALSE	573
MIGA2	0.171	0.323	0.917538	0.16	0.168694	0.249647	FALSE	574
ZDHHC8	0.114	0.268	1.2332	0.112	0.117596	0.249135	FALSE	575
R3HDM2	0.0321	0.182	2.50329	0.046	0.0428319	0.249018	FALSE	576
PIP5KL1	0.0181	0.148	3.03154	0.0262	0.0209326	0.248518	FALSE	577
FDFT1	0.0179	0.347	4.2769	0.182	0.192494	0.248308	FALSE	578
MLH1	0.0706	0.214	1.59987	0.0692	0.0691644	0.248265	FALSE	579
KIAA0513	0.0425	0.188	2.1452	0.051	0.0482651	0.247477	FALSE	580
TAPT1	0.125	0.385	1.62293	0.216	0.227826	0.247323	FALSE	581
SSX2B	0.163	0.38	1.22113	0.212	0.223459	0.247305	FALSE	582
SCGB1C1	0.354	0.611	0.787423	0.38	0.393954	0.247183	FALSE	583
C6orf47	0.121	0.257	1.08676	0.105	0.109396	0.246976	FALSE	584
ARHGEF28	0.134	0.273	1.02667	0.119	0.124663	0.246864	FALSE	585
BTG1	0.0316	0.353	3.48167	0.189	0.20026	0.246537	FALSE	586
CTNNBIP1	0.0463	0.195	2.07439	0.0566	0.0544315	0.246509	FALSE	587
TSC22D3	0.026	0.254	3.28824	0.103	0.107096	0.246437	FALSE	588
PNPLA7	0.0258	0.17	2.72009	0.039	0.0357988	0.245842	FALSE	589
TRAPPC6B	0.0868	0.229	1.39958	0.0825	0.0847305	0.245479	FALSE	590
ARR3	0.00754	0.232	4.94342	0.0855	0.0880637	0.244807	FALSE	591
CRYGA	0.0921	0.269	1.54633	0.118	0.123529	0.244314	FALSE	592
CNOT6	0.0396	0.254	2.68126	0.105	0.109396	0.244093	FALSE	593
KCNS1	0.0153	0.154	3.33133	0.0309	0.0263325	0.243244	FALSE	594
CCNC	0.325	0.58	0.835613	0.367	0.380854	0.24316	FALSE	595
NUDT22	0.1	0.253	1.33914	0.105	0.109396	0.243132	FALSE	596
SLC7A3	0.014	0.231	4.04439	0.0866	0.0891637	0.242507	FALSE	597
NDUFAF5	0.0764	0.309	2.01596	0.156	0.164328	0.242345	FALSE	598
UBE2T	0.2	0.378	0.918386	0.217	0.228759	0.242155	FALSE	599
EDA2R	0.00196	0.228	6.86204	0.0844	0.0869638	0.241831	FALSE	600
SLC23A3	0.0254	0.18	2.8251	0.0487	0.0457318	0.241161	FALSE	601
SLC9A3R1	0.035	0.175	2.32193	0.0451	0.0419986	0.240934	FALSE	602
ULBP2	0.0335	0.223	2.73481	0.0818	0.0837639	0.240158	FALSE	603
E2F4	0.0199	0.192	3.27027	0.0582	0.0561981	0.240053	FALSE	604
PREX1	0.0321	0.176	2.45493	0.0464	0.0433319	0.239922	FALSE	605
PCDHGA6	0.0136	0.147	3.43414	0.0288	0.0234659	0.239546	FALSE	606
NDUFB11	0.349	0.635	0.86353	0.408	0.420786	0.238721	FALSE	607
EEF1AKMT2	0.175	0.354	1.01639	0.201	0.211726	0.238676	FALSE	608
SPTLC2	0.0498	0.354	2.82953	0.201	0.211726	0.238676	FALSE	609
IL11RA	0.0187	0.143	2.9349	0.0271	0.0216326	0.238079	FALSE	610
MYBPHL	0.189	0.359	0.925598	0.207	0.217826	0.237619	FALSE	611
MC1R	0.00913	0.19	4.37924	0.0582	0.0561981	0.237553	FALSE	612
EXTL1	0.208	0.342	0.717413	0.191	0.20236	0.237305	FALSE	613
ERAS	0.00166	0.226	7.089	0.0866	0.0891637	0.237257	FALSE	614
KCTD10	0.445	0.685	0.622299	0.438	0.450452	0.237251	FALSE	615
SYNRG	0.0179	0.137	2.93614	0.0241	0.0185994	0.237079	FALSE	616
C16orf74	0.0415	0.162	1.96481	0.0378	0.0344989	0.236876	FALSE	617
TARBP2	0.0493	0.198	2.00584	0.0643	0.0636312	0.236873	FALSE	618
SSR1	0.0374	0.319	3.09245	0.171	0.181027	0.23678	FALSE	619
AHDC1	0.0433	0.201	2.21476	0.0667	0.0666311	0.236441	FALSE	620
FZD5	0.0355	0.175	2.30146	0.0478	0.0447652	0.236085	FALSE	621
COPS7A	0.0198	0.174	3.13551	0.0473	0.0441652	0.235756	FALSE	622
MATR3	0.178	0.376	1.07886	0.225	0.236592	0.235376	FALSE	623
RNF145	0.0712	0.268	1.91228	0.127	0.132429	0.235309	FALSE	624
C12orf10	0.237	0.414	0.804744	0.259	0.270491	0.235089	FALSE	625
ATP2A3	0.0214	0.188	3.13505	0.0582	0.0561981	0.235052	FALSE	626
ARHGEF39	0.0183	0.199	3.44285	0.0661	0.0659311	0.235001	FALSE	627
HMCES	0.164	0.318	0.955331	0.173	0.182694	0.234772	FALSE	628
MARCKSL1	0.088	0.248	1.49476	0.108	0.113096	0.234745	FALSE	629
EIF4ENIF1	0.0627	0.224	1.83696	0.0869	0.089597	0.234686	FALSE	630
2023-03-09	0.299	0.496	0.730195	0.322	0.336722	0.234473	FALSE	631
H6PD	0.0884	0.212	1.26195	0.0769	0.078564	0.234213	FALSE	632
FOXC2	0.256	0.426	0.73471	0.27	0.282757	0.233698	FALSE	633
XPO6	0.0131	0.377	4.84693	0.228	0.239959	0.233689	FALSE	634
IGF2BP3	0.131	0.345	1.39703	0.201	0.211726	0.232608	FALSE	635
BPIFB3	0.0766	0.22	1.52209	0.0854	0.0880304	0.232181	FALSE	636
SETX	0.244	0.465	0.93035	0.302	0.316789	0.232142	FALSE	637
COMMD3	0.0481	0.296	2.62149	0.157	0.164861	0.231733	FALSE	638
PPHLN1	0.276	0.403	0.546112	0.257	0.268491	0.230141	FALSE	639
KRT18	0.129	0.315	1.28798	0.177	0.186494	0.229741	FALSE	640
KCTD19	0.0217	0.186	3.09954	0.0598	0.0581981	0.229727	FALSE	641
PRDX5	0.116	0.302	1.38042	0.165	0.173894	0.229434	FALSE	642
LIN37	0.176	0.438	1.31536	0.286	0.300257	0.228858	FALSE	643
MED16	0.0585	0.478	3.0305	0.317	0.332356	0.228674	FALSE	644
LRP1	0.0715	0.27	1.91694	0.138	0.145062	0.226381	FALSE	645
DNAJC30	0.0996	0.271	1.44408	0.139	0.146195	0.226303	FALSE	646
PTH2R	0.0623	0.195	1.64617	0.0692	0.0691644	0.226223	FALSE	647
OR6C6	0.275	0.422	0.617811	0.277	0.291024	0.226222	FALSE	648
CSDE1	0.437	0.605	0.469302	0.412	0.425419	0.224566	FALSE	649
MTCH2	0.0997	0.336	1.7528	0.204	0.214893	0.224373	FALSE	650
SPRR2G	0.214	0.367	0.778169	0.233	0.244759	0.224333	FALSE	651
RNF181	0.18	0.317	0.816486	0.186	0.196193	0.224219	FALSE	652
AGBL3	0.0224	0.158	2.81835	0.0409	0.0381654	0.224096	FALSE	653
RTL10	0.0277	0.153	2.46557	0.0382	0.0347988	0.223141	FALSE	654
SLC25A28	0.279	0.528	0.920273	0.363	0.377921	0.223132	FALSE	655
TBC1D10B	0.0355	0.233	2.71444	0.106	0.11043	0.222961	FALSE	656
FOSB	0.119	0.277	1.21892	0.149	0.156861	0.222842	FALSE	657
KLHDC8A	0.319	0.454	0.509136	0.308	0.323189	0.222707	FALSE	658
HPSE	0.0325	0.157	2.27225	0.0409	0.0381654	0.222678	FALSE	659
MYD88	0.0223	0.419	4.23183	0.28	0.29429	0.222583	FALSE	660
MTF1	0.0326	0.338	3.37408	0.209	0.220659	0.221822	FALSE	661
NDE1	0.489	0.635	0.376922	0.435	0.447552	0.221715	FALSE	662
ZNF350	0.0137	0.137	3.32193	0.0294	0.0241325	0.221583	FALSE	663
PHKG1	0.277	0.464	0.744239	0.318	0.333222	0.221451	FALSE	664
TERF2IP	0.0316	0.166	2.39319	0.0495	0.0463985	0.22136	FALSE	665
GALK2	0.0415	0.224	2.43232	0.0987	0.102763	0.221348	FALSE	666
CCDC92	0.0352	0.181	2.36234	0.062	0.060898	0.219987	FALSE	667
CCDC85B	0.148	0.303	1.03372	0.178	0.188094	0.219865	FALSE	668
PRAM1	0.14	0.279	0.994838	0.156	0.164328	0.218817	FALSE	669
GTF2I	0.296	0.443	0.58171	0.306	0.320723	0.218785	FALSE	670
ASL	0.106	0.247	1.22045	0.125	0.130429	0.218503	FALSE	671
MPRIP	0.0274	0.204	2.89632	0.0832	0.0852972	0.218089	FALSE	672
TAX1BP3	0.00933	0.135	3.85494	0.0297	0.0245658	0.217305	FALSE	673
SNX12	0.0891	0.286	1.68252	0.165	0.173894	0.217278	FALSE	674
DUSP14	0.027	0.163	2.59384	0.0496	0.0465984	0.217055	FALSE	675
ZNF785	0.0754	0.215	1.5117	0.0946	0.0978301	0.217048	FALSE	676
SLC12A8	0.0862	0.216	1.32527	0.0954	0.09903	0.216914	FALSE	677
RNASE9	0.0392	0.155	1.98334	0.043	0.0399653	0.216739	FALSE	678
JHY	0.281	0.404	0.523785	0.277	0.291024	0.216573	FALSE	679
FMR1NB	0.0175	0.22	3.65208	0.0997	0.103663	0.216563	FALSE	680
CATSPER3	0.137	0.318	1.21485	0.198	0.208593	0.216463	FALSE	681
KIF3B	0.00736	0.127	4.10898	0.0254	0.019866	0.21614	FALSE	682
RCE1	0.0719	0.247	1.78045	0.128	0.133562	0.215956	FALSE	683
CAPRIN1	0.0413	0.386	3.22439	0.264	0.276157	0.215713	FALSE	684
C2orf15	0.018	0.156	3.11548	0.0447	0.0415986	0.215424	FALSE	685
AVPR2	0.00451	0.204	5.4993	0.0866	0.0891637	0.214162	FALSE	686
CHD2	0.0148	0.148	3.32193	0.0391	0.0361321	0.213432	FALSE	687
ARID3C	0.0986	0.241	1.28937	0.125	0.130429	0.213195	FALSE	688
RFPL4B	0.0422	0.241	2.51372	0.125	0.130429	0.213195	FALSE	689
CCDC93	0.0672	0.216	1.6845	0.0995	0.103097	0.213139	FALSE	690
ARHGEF9	0.00375	0.201	5.74416	0.0855	0.0880637	0.212096	FALSE	691
TNP2	0.01	0.13	3.70044	0.0288	0.0234659	0.211843	FALSE	692
SHCBP1	0.0349	0.182	2.38264	0.0685	0.0685644	0.21183	FALSE	693
KRT23	0.085	0.193	1.18307	0.0797	0.0816639	0.209978	FALSE	694
WNK3	0.0425	0.23	2.4361	0.117	0.122496	0.209732	FALSE	695
SLMAP	0.226	0.414	0.873308	0.297	0.311956	0.209445	FALSE	696
WDR45	0.0649	0.248	1.93405	0.137	0.143929	0.20878	FALSE	697
LEMD3	0.0545	0.27	2.30863	0.16	0.168694	0.208683	FALSE	698
TTC36	0.0424	0.295	2.79858	0.186	0.196193	0.208658	FALSE	699
PPP1R1B	0.0906	0.218	1.26675	0.106	0.11043	0.208607	FALSE	700
OR4B1	0.0657	0.2	1.60603	0.0884	0.0909636	0.208226	FALSE	701
TWF2	0.0627	0.203	1.69494	0.0922	0.0947302	0.207773	FALSE	702
CERS2	0.227	0.469	1.0469	0.346	0.360688	0.207705	FALSE	703
CEP250	0.087	0.308	1.82384	0.201	0.211726	0.207661	FALSE	704
VCPKMT	0.0594	0.184	1.63117	0.0743	0.0749308	0.207062	FALSE	705
MTMR8	0.00601	0.199	5.04926	0.0888	0.091197	0.206964	FALSE	706
RNF126	0.041	0.186	2.18161	0.0763	0.0777974	0.20628	FALSE	707
SYVN1	0.268	0.498	0.893913	0.372	0.386154	0.205793	FALSE	708
SLC19A1	0.0138	0.153	3.47079	0.0487	0.0457318	0.204987	FALSE	709
CCIN	0.0671	0.203	1.5971	0.0946	0.0978301	0.204934	FALSE	710
SYNDIG1L	0.035	0.145	2.05063	0.0413	0.0386654	0.204838	FALSE	711
ATP4B	0.00213	0.112	5.7165	0.0204	0.0148328	0.204823	FALSE	712
TXNDC9	0.0516	0.429	3.05553	0.318	0.333222	0.204747	FALSE	713
CCDC71L	0.038	0.21	2.46632	0.102	0.10603	0.20466	FALSE	714
APEX1	0.0154	0.145	3.23505	0.0419	0.039132	0.204083	FALSE	715
PCDHA4	0.278	0.386	0.473516	0.282	0.29659	0.203748	FALSE	716
CERCAM	0.283	0.424	0.583262	0.316	0.330856	0.203673	FALSE	717
WDR83	0.488	0.636	0.382146	0.467	0.478684	0.203489	FALSE	718
GDE1	0.14	0.289	1.04564	0.187	0.198093	0.203205	FALSE	719
TRAF2	0.201	0.487	1.27673	0.369	0.383354	0.202787	FALSE	720
MIEN1	0.222	0.416	0.906024	0.31	0.325556	0.202748	FALSE	721
ZBED4	0.0661	0.247	1.90179	0.144	0.151562	0.202394	FALSE	722
DIAPH2	0.0158	0.203	3.68348	0.0972	0.100797	0.2023	FALSE	723
SALL2	0.00474	0.107	4.49658	0.0185	0.0128996	0.202168	FALSE	724
GLRA1	0.0222	0.15	2.75633	0.0482	0.0450652	0.201924	FALSE	725
VILL	0.012	0.272	4.5025	0.171	0.181027	0.201894	FALSE	726
PAGE4	0.00319	0.191	5.90387	0.0855	0.0880637	0.201544	FALSE	727
CAPN15	0.0133	0.134	3.33273	0.0356	0.0315323	0.201167	FALSE	728
TOR1B	0.037	0.194	2.39046	0.0899	0.0922636	0.200784	FALSE	729
CXCL14	0.0593	0.179	1.59386	0.0749	0.0756975	0.200644	FALSE	730
AUNIP	0.0483	0.186	1.94521	0.0818	0.0837639	0.200311	FALSE	731
MAP6D1	0.013	0.222	4.09398	0.12	0.125596	0.200028	FALSE	732
POU1F1	0.0175	0.246	3.81323	0.146	0.154295	0.199666	FALSE	733
MTRF1L	0.211	0.399	0.919146	0.301	0.316023	0.199612	FALSE	734
STK35	0.0396	0.163	2.0413	0.0609	0.059698	0.199519	FALSE	735
RNF25	0.0702	0.267	1.9273	0.17	0.179161	0.199384	FALSE	736
NABP2	0.0557	0.381	2.77404	0.286	0.300257	0.199075	FALSE	737
RHOT1	0.0696	0.198	1.50834	0.0954	0.09903	0.198838	FALSE	738
PRR27	0.00433	0.113	4.70581	0.0231	0.0174328	0.198726	FALSE	739
SLC22A25	0.244	0.365	0.581015	0.273	0.28619	0.198321	FALSE	740
ZBTB9	0.0368	0.147	1.99804	0.0478	0.0447652	0.198312	FALSE	741
DAGLB	0.0547	0.263	2.26545	0.168	0.177227	0.197636	FALSE	742
ZFP14	0.00472	0.104	4.46165	0.0181	0.0125996	0.197563	FALSE	743
RBM34	0.207	0.411	0.989508	0.316	0.330856	0.197429	FALSE	744
SLC35F3	0.0248	0.342	3.78558	0.254	0.265424	0.197012	FALSE	745
GAS8	0.0134	0.289	4.43076	0.198	0.208593	0.196722	FALSE	746
SLC9A3	0.129	0.278	1.10771	0.186	0.196193	0.196634	FALSE	747
APOPT1	0.035	0.191	2.44815	0.0915	0.0940302	0.196106	FALSE	748
LRRC71	0.0583	0.179	1.61839	0.0783	0.0802973	0.196059	FALSE	749
FBXW11	0.279	0.558	1	0.433	0.445518	0.195933	FALSE	750
ANKRD10	0.014	0.139	3.31159	0.0417	0.0390654	0.195741	FALSE	751
CCNE1	0.031	0.428	3.78727	0.335	0.349188	0.19557	FALSE	752
MLKL	0.0142	0.12	3.07907	0.0288	0.0234659	0.195548	FALSE	753
CCNF	0.0335	0.459	3.77626	0.361	0.375587	0.195208	FALSE	754
MAP3K11	0.238	0.393	0.723568	0.304	0.319056	0.19498	FALSE	755
ORMDL3	0.0388	0.159	2.0349	0.0609	0.059698	0.194622	FALSE	756
SSH2	0.119	0.433	1.86341	0.342	0.355888	0.194281	FALSE	757
UBE2A	0.133	0.401	1.59218	0.313	0.328056	0.194105	FALSE	758
HAX1	0.232	0.365	0.653772	0.28	0.29429	0.193897	FALSE	759
SNAP23	0.843	0.476	-0.824571	0.378	0.391754	0.193726	FALSE	760
PI4KB	0.329	0.541	0.717541	0.426	0.438585	0.193649	FALSE	761
PYURF	0.298	0.514	0.786456	0.407	0.420553	0.193356	FALSE	762
TBC1D22B	0.152	0.324	1.09192	0.242	0.253425	0.193153	FALSE	763
TK2	0.054	0.21	1.95936	0.115	0.120563	0.192945	FALSE	764
RGMA	0.0327	0.141	2.10833	0.046	0.0428319	0.192921	FALSE	765
PLEKHM1	0.154	0.297	0.947533	0.213	0.224659	0.192597	FALSE	766
RAB7A	0.202	0.45	1.15557	0.359	0.373488	0.192476	FALSE	767
INTS12	0.582	0.206	-1.49837	0.111	0.116529	0.192314	FALSE	768
TMEM177	0.103	0.262	1.34692	0.175	0.184994	0.192005	FALSE	769
GYPB	0.0175	0.113	2.6909	0.0257	0.0200327	0.191904	FALSE	770
MYH9	0.547	0.616	0.17139	0.477	0.48815	0.191851	FALSE	771
TSACC	0.163	0.301	0.884892	0.219	0.230792	0.19167	FALSE	772
DUXA	0.0215	0.122	2.50447	0.0313	0.0268658	0.191638	FALSE	773
NPC1L1	0.13	0.264	1.02203	0.178	0.188094	0.191565	FALSE	774
PTGES2	0.111	0.238	1.1004	0.149	0.156861	0.191467	FALSE	775
MAGEB16	0.0457	0.218	2.25406	0.127	0.132429	0.191408	FALSE	776
GRM5	0.0041	0.124	4.91857	0.0332	0.028699	0.191224	FALSE	777
GIGYF2	0.137	0.504	1.87925	0.405	0.417953	0.190952	FALSE	778
NME2	0.218	0.472	1.11446	0.38	0.393954	0.19095	FALSE	779
INS	0.292	0.521	0.835315	0.417	0.430119	0.1909	FALSE	780
LRTM1	0.0195	0.118	2.59724	0.0294	0.0241325	0.190853	FALSE	781
C16orf46	0.0877	0.217	1.30705	0.127	0.132429	0.19053	FALSE	782
MSN	0.0113	0.202	4.15996	0.109	0.113996	0.190508	FALSE	783
PRMT2	0.0242	0.187	2.94996	0.0929	0.0959301	0.190374	FALSE	784
NAMPT	0.0661	0.344	2.37969	0.268	0.280257	0.19004	FALSE	785
SLC10A3	0.00577	0.18	4.96328	0.0866	0.0891637	0.188966	FALSE	786
BMP15	0.00663	0.179	4.75481	0.0855	0.0880637	0.188881	FALSE	787
SOCS3	0.124	0.443	1.83697	0.361	0.375587	0.188403	FALSE	788
C16orf72	0.582	0.712	0.290858	0.537	0.544415	0.188018	FALSE	789
KLC3	0.0577	0.195	1.75683	0.105	0.109396	0.187394	FALSE	790
MRPL58	0.21	0.374	0.832649	0.301	0.316023	0.187105	FALSE	791
TNFSF9	0.01	0.13	3.70044	0.0394	0.0363988	0.187059	FALSE	792
INKA1	0.0537	0.179	1.73697	0.0876	0.0902303	0.186992	FALSE	793
RBM44	0.0173	0.126	2.86458	0.0367	0.0331989	0.186338	FALSE	794
THEM6	0.0357	0.157	2.13677	0.0655	0.0651978	0.186165	FALSE	795
FOXS1	0.0452	0.222	2.29616	0.138	0.145062	0.186135	FALSE	796
NTF3	0.172	0.387	1.16993	0.316	0.330856	0.1859	FALSE	797
TXNDC17	0.178	0.336	0.916584	0.268	0.280257	0.185621	FALSE	798
H2BFWT	0.0242	0.193	2.99552	0.105	0.109396	0.185472	FALSE	799
MAN2C1	0.0739	0.314	2.08712	0.246	0.256658	0.185463	FALSE	800
RARRES2	0.255	0.383	0.586847	0.314	0.328822	0.185004	FALSE	801
MPC2	0.0756	0.201	1.41074	0.115	0.120563	0.184676	FALSE	802
ZNF511	0.306	0.48	0.649503	0.4	0.41252	0.184587	FALSE	803
PLCZ1	0.0234	0.134	2.51765	0.0451	0.0419986	0.184487	FALSE	804
TUBB3	0.0118	0.148	3.64874	0.0587	0.0567981	0.184359	FALSE	805
CYB5D2	0.0433	0.149	1.78287	0.0598	0.0581981	0.184029	FALSE	806
HSD11B2	0.18	0.361	1.004	0.295	0.309756	0.183742	FALSE	807
ARL5C	0.0688	0.192	1.48063	0.106	0.11043	0.183728	FALSE	808
KRT25	0.0948	0.203	1.09852	0.119	0.124663	0.183566	FALSE	809
IPO4	0.0199	0.242	3.60417	0.166	0.174894	0.183248	FALSE	810
B4GALT5	0.0335	0.17	2.3433	0.0818	0.0837639	0.18308	FALSE	811
ATG9A	0.0729	0.463	2.66702	0.389	0.40292	0.182784	FALSE	812
CHST5	0.0191	0.119	2.63932	0.0336	0.0291324	0.182739	FALSE	813
HMOX2	0.0318	0.156	2.29445	0.0673	0.0673978	0.182731	FALSE	814
CREB3L3	0.0276	0.133	2.26869	0.0455	0.0424986	0.182426	FALSE	815
MAZ	0.0711	0.196	1.46293	0.112	0.117596	0.182203	FALSE	816
ZNF683	0.0407	0.166	2.02808	0.0783	0.0802973	0.18182	FALSE	817
OR2A5	0.0135	0.13	3.26748	0.043	0.0399653	0.181781	FALSE	818
ZNF195	0.0265	0.145	2.45199	0.0582	0.0561981	0.18129	FALSE	819
ZNF132	0.0556	0.169	1.60387	0.0825	0.0847305	0.181161	FALSE	820
ODR4	0.309	0.466	0.592723	0.396	0.408886	0.180993	FALSE	821
COPRS	0.0671	0.196	1.54647	0.114	0.119429	0.180886	FALSE	822
ZNF8	0.0471	0.167	1.82605	0.0811	0.0830306	0.180487	FALSE	823
RABEP1	0.119	0.234	0.975547	0.162	0.170294	0.179899	FALSE	824
CHD6	0.0225	0.196	3.12286	0.116	0.121463	0.179449	FALSE	825
CLPP	0.0646	0.275	2.08983	0.211	0.222893	0.179274	FALSE	826
PIMREG	0.102	0.218	1.09576	0.143	0.150595	0.179237	FALSE	827
UCN	0.281	0.492	0.808088	0.419	0.432219	0.179234	FALSE	828
CD68	0.0514	0.19	1.88616	0.109	0.113996	0.179191	FALSE	829
MAGEC2	0.013	0.182	3.80735	0.0997	0.103663	0.179156	FALSE	830
OR4S2	0.0134	0.155	3.53196	0.0698	0.0698643	0.17914	FALSE	831
FAM53C	0.0338	0.17	2.33044	0.0861	0.0888304	0.178745	FALSE	832
MTFR2	0.00779	0.095	3.60823	0.0187	0.0131662	0.178651	FALSE	833
MED24	0.431	0.554	0.362198	0.465	0.476217	0.178496	FALSE	834
LYPD6B	0.0273	0.122	2.15991	0.0378	0.0344989	0.178388	FALSE	835
SENP7	0.00956	0.348	5.18593	0.293	0.307356	0.1783	FALSE	836
IL11	0.0174	0.123	2.8215	0.0386	0.0355321	0.178274	FALSE	837
IFNLR1	0.322	0.444	0.463499	0.383	0.396753	0.178257	FALSE	838
PALM	0.164	0.344	1.06871	0.289	0.30349	0.178142	FALSE	839
SPATA25	0.0169	0.129	2.93228	0.0447	0.0415986	0.178139	FALSE	840
PTPN11	0.717	0.794	0.147166	0.589	0.596713	0.178042	FALSE	841
TDRD5	0.0366	0.144	1.97615	0.0599	0.0581981	0.177853	FALSE	842
ACTL7A	0.176	0.34	0.949959	0.286	0.300257	0.177653	FALSE	843
LCE3A	0.195	0.34	0.802061	0.286	0.300257	0.177653	FALSE	844
EGFR	0.00667	0.194	4.86223	0.116	0.121463	0.177618	FALSE	845
SLC4A7	0.176	0.415	1.23754	0.359	0.373488	0.177505	FALSE	846
CST3	0.095	0.241	1.34303	0.174	0.183694	0.177353	FALSE	847
CRHR1	0.021	0.114	2.44057	0.0322	0.0278657	0.177262	FALSE	848
GAB2	0.224	0.377	0.751066	0.324	0.338722	0.177249	FALSE	849
ACKR1	0.0326	0.126	1.95048	0.0421	0.0392987	0.177108	FALSE	850
CRYGD	0.0552	0.212	1.94132	0.139	0.146195	0.177034	FALSE	851
GRHL2	0.0391	0.231	2.56265	0.163	0.171528	0.176869	FALSE	852
THBD	0.0258	0.169	2.71158	0.0876	0.0902303	0.176545	FALSE	853
UMOD	0.0397	0.158	1.99271	0.0756	0.0766308	0.176264	FALSE	854
TSC22D2	0.516	0.236	-1.12858	0.17	0.179161	0.176235	FALSE	855
HMG20A	0.00382	0.0989	4.69433	0.0223	0.0165328	0.176206	FALSE	856
MDP1	0.104	0.221	1.08746	0.152	0.159628	0.176113	FALSE	857
COMMD7	0.0785	0.211	1.42648	0.141	0.147895	0.17514	FALSE	858
CXCL5	0.00917	0.293	4.99784	0.241	0.252725	0.175024	FALSE	859
RYR2	0.0341	0.251	2.87984	0.19	0.201193	0.174793	FALSE	860
SRI	0.0491	0.173	1.81698	0.0946	0.0978301	0.174648	FALSE	861
IGFBP6	0.0592	0.228	1.94536	0.163	0.171528	0.174572	FALSE	862
CDKN2AIPNL	0.166	0.311	0.905731	0.263	0.275224	0.174257	FALSE	863
KLF8	0.027	0.191	2.82254	0.117	0.122496	0.174169	FALSE	864
CYSLTR1	0.00562	0.165	4.87575	0.0855	0.0880637	0.174108	FALSE	865
VRK1	0.733	0.751	0.0349997	0.58	0.586914	0.173801	FALSE	866
ZNF839	0.0211	0.165	2.96715	0.0861	0.0888304	0.173487	FALSE	867
ITPKA	0.0983	0.292	1.57071	0.244	0.254725	0.173427	FALSE	868
C6orf52	0.00513	0.0884	4.10702	0.0162	0.0109663	0.173259	FALSE	869
CMTR2	0.0308	0.184	2.5787	0.11	0.115429	0.172534	FALSE	870
KIAA1211	0.0387	0.247	2.67411	0.189	0.20026	0.172506	FALSE	871
WFIKKN1	0.0266	0.121	2.18551	0.0405	0.0375987	0.172404	FALSE	872
LDHA	0.00468	0.123	4.71601	0.0426	0.039732	0.172306	FALSE	873
AVIL	0.0538	0.179	1.73428	0.105	0.109396	0.172018	FALSE	874
KRTAP5-2	0.0804	0.257	1.6765	0.203	0.214193	0.171983	FALSE	875
PROCR	0.0154	0.143	3.21501	0.0638	0.0629979	0.171696	FALSE	876
WRN	0.0437	0.35	3.00165	0.308	0.323189	0.17169	FALSE	877
DUSP21	0.00607	0.165	4.76463	0.0888	0.091197	0.171603	FALSE	878
METTL7B	0.157	0.287	0.870286	0.241	0.252725	0.17144	FALSE	879
SMS	0.0559	0.228	2.02811	0.168	0.177227	0.171335	FALSE	880
FGF22	0.00651	0.104	3.99778	0.0282	0.0226992	0.170975	FALSE	881
IER3IP1	0.0658	0.493	2.90543	0.438	0.450452	0.170751	FALSE	882
FAM160B2	0.0183	0.117	2.67659	0.0382	0.0347988	0.170637	FALSE	883
RUSC1	0.107	0.279	1.38265	0.233	0.244759	0.170542	FALSE	884
CTLA4	0.0205	0.114	2.47534	0.036	0.0319989	0.170415	FALSE	885
MAST2	0.0914	0.197	1.10793	0.131	0.137329	0.169861	FALSE	886
TAX1BP1	0.0587	0.187	1.67161	0.118	0.123529	0.169839	FALSE	887
RAB26	0.135	0.384	1.50815	0.348	0.362488	0.169231	FALSE	888
PRKCZ	0.115	0.316	1.45829	0.278	0.29209	0.168897	FALSE	889
PGR	0.00395	0.0952	4.59104	0.0226	0.0169328	0.168625	FALSE	890
MARVELD3	0.025	0.128	2.35614	0.051	0.0482651	0.168495	FALSE	891
CHCHD10	0.0241	0.162	2.74889	0.0892	0.0915636	0.168201	FALSE	892
CBLN3	0.0676	0.209	1.62841	0.149	0.156861	0.168137	FALSE	893
AP3B1	0.137	0.326	1.2507	0.291	0.30539	0.167937	FALSE	894
OR2A14	0.0386	0.218	2.49766	0.162	0.170294	0.167598	FALSE	895
HSP90AA1	0.041	0.186	2.18161	0.12	0.125596	0.167591	FALSE	896
ETHE1	0.0284	0.159	2.48506	0.0859	0.0884971	0.167438	FALSE	897
DPEP2	0.0752	0.254	1.75602	0.208	0.219226	0.167413	FALSE	898
C12orf49	0.247	0.453	0.875	0.414	0.427319	0.167269	FALSE	899
TMA7	0.199	0.369	0.890852	0.338	0.352388	0.167149	FALSE	900
FBXW5	0.00656	0.0937	3.83628	0.0222	0.0165328	0.166941	FALSE	901
TFG	0.0618	0.253	2.03346	0.208	0.219226	0.166754	FALSE	902
VPS26C	0.0233	0.148	2.6672	0.0743	0.0749308	0.16655	FALSE	903
CPLANE2	0.106	0.209	0.979439	0.152	0.159628	0.16655	FALSE	904
RBM26	0.0289	0.287	3.31191	0.252	0.262891	0.166524	FALSE	905
DYNLT1	0.132	0.465	1.81669	0.426	0.438585	0.166445	FALSE	906
PRKAB2	0.0325	0.131	2.01106	0.0561	0.0538982	0.166164	FALSE	907
SLC2A7	0.0241	0.128	2.40904	0.053	0.050465	0.166017	FALSE	908
ALG9	0.0358	0.168	2.23043	0.0995	0.103097	0.165775	FALSE	909
AFP	0.00997	0.159	3.99529	0.0884	0.0909636	0.16554	FALSE	910
PIP5K1A	0.319	0.448	0.489942	0.414	0.427319	0.165423	FALSE	911
TTYH3	0.00339	0.0874	4.68828	0.0185	0.0128996	0.165136	FALSE	912
ADGRB1	0.0097	0.104	3.42245	0.0306	0.0258991	0.165018	FALSE	913
NT5C1A	0.0131	0.103	2.97501	0.03	0.0249992	0.165014	FALSE	914
LMNB1	0.059	0.228	1.95025	0.179	0.18936	0.164778	FALSE	915
TIPARP	0.112	0.343	1.61471	0.316	0.330856	0.164764	FALSE	916
TJP2	0.00932	0.121	3.69853	0.0469	0.0436319	0.164584	FALSE	917
SLC3A2	0.425	0.574	0.433588	0.508	0.516949	0.164481	FALSE	918
AMBRA1	0.0584	0.445	2.92977	0.414	0.427319	0.164315	FALSE	919
C1orf52	0.049	0.16	1.70722	0.0915	0.0940302	0.164277	FALSE	920
ACBD3	0.0213	0.293	3.78198	0.263	0.275224	0.164172	FALSE	921
MMP23B	0.0196	0.134	2.77331	0.0609	0.059698	0.164021	FALSE	922
SCARF2	0.0529	0.161	1.60572	0.093	0.0959635	0.163881	FALSE	923
ZKSCAN5	0.154	0.318	1.0461	0.291	0.30539	0.163816	FALSE	924
BOLA1	0.128	0.288	1.16993	0.259	0.270491	0.16354	FALSE	925
SOWAHB	0.0548	0.273	2.31665	0.241	0.252725	0.163077	FALSE	926
PSMD10	0.101	0.297	1.55611	0.27	0.282757	0.16293	FALSE	927
HSPA1A	0.161	0.28	0.798366	0.251	0.262025	0.162864	FALSE	928
ZNF843	0.0195	0.139	2.83354	0.0673	0.0673978	0.162818	FALSE	929
POMT1	0.0444	0.185	2.05889	0.127	0.132429	0.162433	FALSE	930
USP16	0.0186	0.12	2.68966	0.0476	0.0443652	0.162355	FALSE	931
LRRC59	0.0454	0.158	1.79916	0.0915	0.0940302	0.162224	FALSE	932
OR13C4	0.00627	0.0887	3.8224	0.0204	0.0148328	0.162212	FALSE	933
PRDM12	0.0139	0.12	3.10988	0.0481	0.0449985	0.161616	FALSE	934
NOTO	0.116	0.31	1.41814	0.287	0.30109	0.161604	FALSE	935
FGF14	0.0179	0.116	2.69609	0.0438	0.040632	0.161371	FALSE	936
TPGS1	0.0729	0.199	1.44878	0.147	0.154762	0.161257	FALSE	937
OR6C4	0.0101	0.132	3.70811	0.0615	0.060698	0.160621	FALSE	938
MECOM	0.00118	0.451	8.5782	0.428	0.440452	0.160602	FALSE	939
MAP7D2	0.00131	0.152	6.85836	0.0855	0.0880637	0.160391	FALSE	940
RASD2	0.132	0.269	1.02707	0.242	0.253425	0.160365	FALSE	941
ATG14	0.0289	0.139	2.26594	0.0704	0.070331	0.160247	FALSE	942
LACRT	0.0138	0.133	3.26869	0.0632	0.0624313	0.160212	FALSE	943
NYX	0.0246	0.177	2.84702	0.119	0.124663	0.160055	FALSE	944
PLAGL2	0.0928	0.229	1.30315	0.19	0.201193	0.159473	FALSE	945
PPP1R15A	0.102	0.231	1.17932	0.193	0.204293	0.159331	FALSE	946
LCE6A	0.0326	0.132	2.01759	0.0632	0.0624313	0.159007	FALSE	947
SPRYD4	0.216	0.467	1.11239	0.445	0.456885	0.15887	FALSE	948
EFNB1	0.02	0.163	3.0268	0.102	0.10603	0.158855	FALSE	949
NCOA6	0.0242	0.314	3.69769	0.297	0.311956	0.158855	FALSE	950
AKIRIN1	0.284	0.407	0.519138	0.394	0.40732	0.158756	FALSE	951
ARL10	0.0311	0.224	2.84851	0.186	0.196193	0.158439	FALSE	952
SLC52A2	0.105	0.224	1.09311	0.186	0.196193	0.158439	FALSE	953
PRAMEF13	0.0434	0.137	1.65841	0.0698	0.0698643	0.158337	FALSE	954
UBE2V2	0.0376	0.171	2.18519	0.114	0.119429	0.157814	FALSE	955
DNAAF2	0.0293	0.133	2.18245	0.0655	0.0651978	0.157707	FALSE	956
FGF23	0.00617	0.0984	3.99532	0.03	0.0249992	0.157644	FALSE	957
INPP4A	0.0543	0.164	1.59467	0.105	0.109396	0.157604	FALSE	958
ATP11A	0.00667	0.126	4.23959	0.0582	0.0561981	0.157535	FALSE	959
BRD7	0.0906	0.24	1.40545	0.209	0.220659	0.157507	FALSE	960
GRIN3B	0.0373	0.142	1.92864	0.0763	0.0777974	0.157483	FALSE	961
NRARP	0.0485	0.178	1.87582	0.125	0.130429	0.157463	FALSE	962
PIM2	0.0778	0.226	1.53848	0.19	0.201193	0.157383	FALSE	963
ATF1	0.144	0.342	1.24793	0.332	0.346688	0.157341	FALSE	964
ATG16L1	0.0197	0.113	2.52006	0.0438	0.040632	0.157198	FALSE	965
PRICKLE2	0.0311	0.116	1.89914	0.0473	0.0441652	0.157171	FALSE	966
VKORC1L1	0.177	0.327	0.885541	0.316	0.330856	0.157078	FALSE	967
KANK4	0.0238	0.205	3.10659	0.163	0.171528	0.156962	FALSE	968
JMY	0.124	0.235	0.922321	0.204	0.214893	0.156928	FALSE	969
CRIP2	0.00944	0.101	3.41942	0.0326	0.0282324	0.156474	FALSE	970
PROZ	0.0126	0.338	4.74553	0.33	0.344555	0.156407	FALSE	971
ELOA	0.0901	0.272	1.59401	0.255	0.266091	0.156392	FALSE	972
ZNF555	0.0884	0.196	1.14874	0.152	0.159628	0.156191	FALSE	973
ZNF226	0.0376	0.14	1.89662	0.0756	0.0766308	0.156184	FALSE	974
WDR38	0.0916	0.334	1.86643	0.326	0.340722	0.156178	FALSE	975
TMEM30A	0.102	0.375	1.87832	0.369	0.383354	0.15615	FALSE	976
PPP1R1A	0.0885	0.265	1.58224	0.247	0.257691	0.156059	FALSE	977
SMCR8	0.211	0.346	0.713529	0.34	0.354122	0.155993	FALSE	978
RC3H2	0.0169	0.114	2.75394	0.046	0.0428319	0.155979	FALSE	979
ZNF778	0.0225	0.169	2.90903	0.114	0.119429	0.155968	FALSE	980
ATP5PF	0.401	0.503	0.326956	0.48	0.49065	0.155542	FALSE	981
ABCA2	0.00979	0.136	3.79615	0.0717	0.0719643	0.155432	FALSE	982
HNRNPD	0.0982	0.354	1.84995	0.35	0.364388	0.155206	FALSE	983
PRAMEF20	0.163	0.294	0.850944	0.282	0.29659	0.155186	FALSE	984
TBRG4	0.0652	0.321	2.29963	0.314	0.328822	0.155055	FALSE	985
PCIF1	0.0634	0.285	2.16841	0.273	0.28619	0.154853	FALSE	986
TMEM151A	0.0237	0.142	2.58293	0.079	0.081264	0.154794	FALSE	987
CCDC121	0.0168	0.121	2.84847	0.055	0.0526316	0.154729	FALSE	988
THY1	0.0039	0.0817	4.38879	0.0183	0.0127996	0.154642	FALSE	989
TSTD2	0.000447	0.0802	7.48718	0.0173	0.0117996	0.154636	FALSE	990
COQ10A	0.0468	0.148	1.66102	0.0876	0.0902303	0.154608	FALSE	991
FNDC7	0.0191	0.166	3.11954	0.112	0.117596	0.154315	FALSE	992
HIST1H2BI	0.451	0.178	-1.34125	0.13	0.135962	0.154252	FALSE	993
IST1	0.0643	0.478	2.89412	0.465	0.476217	0.154009	FALSE	994
POU6F1	0.0523	0.187	1.83816	0.143	0.150595	0.153749	FALSE	995
FAM214B	0.0618	0.183	1.56616	0.138	0.145062	0.153436	FALSE	996
CIDEB	0.0454	0.264	2.53977	0.252	0.262891	0.153179	FALSE	997
FKBP6	0.041	0.17	2.05184	0.12	0.125596	0.153174	FALSE	998
CENPP	0.483	0.236	-1.03324	0.213	0.224659	0.15304	FALSE	999
GMFB	0.00797	0.0999	3.64783	0.0339	0.029399	0.153014	FALSE	1000
MARK3	0.00627	0.257	5.35716	0.244	0.254725	0.15264	FALSE	1001
TMEM215	0.0497	0.147	1.5645	0.0892	0.0915636	0.152627	FALSE	1002
PKN2	0.0936	0.361	1.94742	0.363	0.377921	0.152558	FALSE	1003
LMO4	0.000798	0.253	8.30853	0.238	0.249858	0.152383	FALSE	1004
GSPT2	0.0218	0.163	2.90247	0.111	0.116529	0.152171	FALSE	1005
THEG	0.00982	0.15	3.9331	0.0938	0.0971301	0.151897	FALSE	1006
INPP5A	0.0283	0.136	2.26473	0.0756	0.0766308	0.151721	FALSE	1007
RABGAP1L	0.0149	0.0965	2.69522	0.0313	0.0268658	0.151582	FALSE	1008
AP4M1	0.00174	0.143	6.36078	0.0847	0.0870971	0.151579	FALSE	1009
C6orf163	0.0118	0.0987	3.06426	0.0336	0.0291324	0.151566	FALSE	1010
CLTB	0.171	0.301	0.815767	0.299	0.313856	0.151484	FALSE	1011
TTC7B	0.0144	0.13	3.17437	0.0685	0.0685644	0.151307	FALSE	1012
PMFBP1	0.0142	0.0997	2.8117	0.0346	0.0303657	0.151306	FALSE	1013
CMTM2	0.0128	0.098	2.93664	0.0336	0.0291324	0.150491	FALSE	1014
BRPF1	0.285	0.448	0.652537	0.45	0.461418	0.150486	FALSE	1015
FAM183A	0.159	0.346	1.12175	0.354	0.367821	0.15029	FALSE	1016
SLC16A8	0.0189	0.116	2.61767	0.0535	0.0510316	0.149891	FALSE	1017
SNRPA	0.456	0.215	-1.0847	0.19	0.201193	0.149723	FALSE	1018
PGLYRP1	0.123	0.281	1.19191	0.28	0.29429	0.149274	FALSE	1019
JKAMP	0.0922	0.295	1.67788	0.297	0.311956	0.149242	FALSE	1020
NDUFS4	0.0702	0.201	1.51765	0.171	0.181027	0.149193	FALSE	1021
TSPYL2	0.00517	0.149	4.849	0.0961	0.0997633	0.149153	FALSE	1022
2023-09-05	0.0362	0.247	2.77045	0.238	0.249858	0.14877	FALSE	1023
TAGLN3	0.052	0.161	1.63048	0.114	0.119429	0.148585	FALSE	1024
DHX58	0.101	0.252	1.31907	0.247	0.257691	0.148403	FALSE	1025
GMFG	0.0145	0.116	3	0.055	0.0526316	0.148335	FALSE	1026
SMARCC1	0.241	0.381	0.660758	0.396	0.408886	0.147979	FALSE	1027
TCF7	0.0146	0.14	3.26139	0.0861	0.0888304	0.147201	FALSE	1028
PDK2	0.295	0.438	0.570216	0.45	0.461418	0.147127	FALSE	1029
MYLK2	0.128	0.24	0.906891	0.233	0.244759	0.146703	FALSE	1030
DSP	0.0277	0.121	2.12705	0.0626	0.0616646	0.146406	FALSE	1031
DNAJB7	0.0109	0.13	3.57611	0.0743	0.0749308	0.146294	FALSE	1032
TSTA3	0.086	0.183	1.08944	0.151	0.158995	0.146147	FALSE	1033
CRYM	0.0174	0.115	2.72447	0.056	0.0538982	0.145869	FALSE	1034
UBALD1	0.211	0.385	0.867615	0.405	0.417953	0.145866	FALSE	1035
HNRNPA1	0.0689	0.227	1.72012	0.216	0.227826	0.145824	FALSE	1036
TGFB1	0.0499	0.158	1.66281	0.114	0.119429	0.145816	FALSE	1037
WDR93	0.0687	0.166	1.2728	0.127	0.132429	0.145751	FALSE	1038
CNGA3	0.0232	0.133	2.51923	0.0783	0.0802973	0.145675	FALSE	1039
TMEM200B	0.117	0.235	1.00615	0.228	0.239959	0.145668	FALSE	1040
FAM83H	0.0966	0.293	1.60081	0.304	0.319056	0.145367	FALSE	1041
OR5AC2	0.00687	0.078	3.50509	0.0193	0.0137662	0.145172	FALSE	1042
UBE2E3	0.0689	0.17	1.30296	0.134	0.140129	0.14509	FALSE	1043
TMEM97	0.33	0.426	0.368387	0.445	0.456885	0.144922	FALSE	1044
IL1F10	0.0377	0.14	1.89279	0.0899	0.0922636	0.144896	FALSE	1045
MRPL23	0.483	0.157	-1.62126	0.114	0.119429	0.144894	FALSE	1046
C17orf49	0.114	0.246	1.10962	0.247	0.257691	0.144869	FALSE	1047
RAB34	0.025	0.226	3.17632	0.217	0.228759	0.144781	FALSE	1048
APOC4	0.00364	0.091	4.64386	0.0306	0.0258991	0.144391	FALSE	1049
TM2D1	0.19	0.326	0.778873	0.346	0.360688	0.144375	FALSE	1050
GRIN2D	0.0898	0.323	1.84675	0.344	0.357788	0.144179	FALSE	1051
RAPGEF5	0.00295	0.0809	4.77735	0.0222	0.0165328	0.144136	FALSE	1052
PHKG2	0.0242	0.114	2.23595	0.0566	0.0544315	0.144113	FALSE	1053
ARID3B	0.138	0.25	0.85726	0.255	0.266091	0.143742	FALSE	1054
PRAC1	0.203	0.417	1.03857	0.44	0.452252	0.143706	FALSE	1055
COX6A2	0.0707	0.355	2.32804	0.38	0.393954	0.143617	FALSE	1056
DYNLT3	0.0645	0.199	1.6254	0.18	0.190094	0.143485	FALSE	1057
RFX8	0.00601	0.1	4.05649	0.0397	0.0368321	0.143377	FALSE	1058
PCDHA7	0.0374	0.142	1.92478	0.0946	0.0978301	0.143353	FALSE	1059
FAM193B	0.108	0.253	1.22811	0.261	0.272858	0.142708	FALSE	1060
FGD4	0.00998	0.154	3.94775	0.113	0.118529	0.142631	FALSE	1061
ADSS	0.372	0.575	0.628259	0.558	0.565114	0.142522	FALSE	1062
CDK5RAP3	0.0645	0.215	1.73697	0.207	0.217826	0.142306	FALSE	1063
SPANXN2	0.0105	0.141	3.74723	0.0947	0.0979301	0.142281	FALSE	1064
TMEM165	0.125	0.285	1.18903	0.302	0.316789	0.14228	FALSE	1065
LRRC8A	0.0107	0.101	3.23867	0.0417	0.0390654	0.142229	FALSE	1066
FAM171B	0.0664	0.148	1.15634	0.105	0.109396	0.142228	FALSE	1067
CCAR2	0.0162	0.187	3.52897	0.165	0.173894	0.142067	FALSE	1068
TNRC6A	0.0259	0.187	2.85201	0.166	0.174894	0.141601	FALSE	1069
ABCA4	0.0357	0.132	1.88654	0.0825	0.0847305	0.141499	FALSE	1070
CRY2	0.0139	0.101	2.8612	0.0426	0.039732	0.141487	FALSE	1071
TEAD4	0.319	0.421	0.400264	0.45	0.461418	0.141416	FALSE	1072
GBP5	0.0689	0.145	1.07348	0.102	0.10603	0.141313	FALSE	1073
NLGN3	0.0106	0.14	3.72329	0.0947	0.0979301	0.141272	FALSE	1074
ARAP1	0.0147	0.0966	2.71621	0.0378	0.0344989	0.141248	FALSE	1075
GALR3	0.00426	0.125	4.87493	0.0736	0.0743309	0.141104	FALSE	1076
GRAMD1A	0.00934	0.0953	3.35098	0.0367	0.0331989	0.140937	FALSE	1077
UBAP2	0.0159	0.125	2.97483	0.0743	0.0749308	0.140667	FALSE	1078
STARD8	0.0307	0.156	2.34524	0.12	0.125596	0.14056	FALSE	1079
CEND1	0.0686	0.181	1.39971	0.159	0.167361	0.140519	FALSE	1080
SLC38A6	0.0122	0.132	3.43558	0.0839	0.0864305	0.14036	FALSE	1081
HSPB9	0.129	0.349	1.43586	0.383	0.396753	0.140116	FALSE	1082
ZNF835	0.097	0.222	1.1945	0.223	0.234692	0.139749	FALSE	1083
NUDT12	0.0527	0.139	1.39921	0.0954	0.09903	0.139588	FALSE	1084
CDK6	0.607	0.436	-0.477368	0.467	0.478684	0.139499	FALSE	1085
IQCN	0.0865	0.219	1.34016	0.219	0.230792	0.139455	FALSE	1086
KEAP1	0.0671	0.29	2.11167	0.316	0.330856	0.139305	FALSE	1087
FEM1C	0.0533	0.166	1.63898	0.138	0.145062	0.139182	FALSE	1088
MYL6B	0.143	0.317	1.14847	0.35	0.364388	0.138984	FALSE	1089
ST13	0.248	0.442	0.833706	0.474	0.485684	0.138632	FALSE	1090
RGS9BP	0.00419	0.114	4.76594	0.062	0.060898	0.138555	FALSE	1091
PDZD9	0.0358	0.122	1.76885	0.073	0.0733976	0.138387	FALSE	1092
HOXC6	0.115	0.245	1.09115	0.261	0.272858	0.138196	FALSE	1093
CD1D	0.22	0.448	1.026	0.481	0.49155	0.138178	FALSE	1094
DENND4C	0.0093	0.104	3.48321	0.0501	0.0469318	0.138167	FALSE	1095
POLQ	0.348	0.464	0.415037	0.495	0.50435	0.137932	FALSE	1096
CACNA2D3	0.00396	0.0799	4.33462	0.0244	0.0187994	0.137896	FALSE	1097
CDK4	0.49	0.239	-1.03577	0.254	0.265424	0.137678	FALSE	1098
SH3BGRL	0.00378	0.132	5.12601	0.0888	0.091197	0.137283	FALSE	1099
RBM6	0.0257	0.116	2.17428	0.0661	0.0659311	0.136985	FALSE	1100
EPX	0.0413	0.156	1.91733	0.127	0.132429	0.136971	FALSE	1101
NHSL1	0.00729	0.0875	3.58529	0.0319	0.0274324	0.136652	FALSE	1102
AMER3	0.0228	0.106	2.21696	0.054	0.0515983	0.136461	FALSE	1103
PGGHG	0.0495	0.207	2.06413	0.208	0.219226	0.136435	FALSE	1104
KLK10	0.0104	0.228	4.45438	0.241	0.252725	0.136196	FALSE	1105
ARF5	0.0105	0.126	3.58496	0.0811	0.0830306	0.136176	FALSE	1106
RMI2	0.1	0.322	1.68706	0.365	0.378821	0.135744	FALSE	1107
TMEM59L	0.0664	0.328	2.30444	0.372	0.386154	0.135543	FALSE	1108
EFNA4	0.0851	0.176	1.04834	0.162	0.170294	0.135309	FALSE	1109
ZFP36L2	0.129	0.294	1.18845	0.332	0.346688	0.135258	FALSE	1110
MTSS1L	0.0158	0.105	2.73239	0.054	0.0515983	0.135173	FALSE	1111
RAG1	0.0216	0.0995	2.20367	0.0472	0.0440985	0.13488	FALSE	1112
FTHL17	0.0191	0.143	2.90437	0.109	0.113996	0.134865	FALSE	1113
AKNA	0.0177	0.0994	2.4895	0.0473	0.0441652	0.134679	FALSE	1114
FGF20	0.0225	0.127	2.49683	0.0847	0.0870971	0.13462	FALSE	1115
SFXN1	0.119	0.221	0.893085	0.234	0.245992	0.134607	FALSE	1116
BRDT	0.0209	0.0939	2.16762	0.0399	0.0369321	0.134521	FALSE	1117
ZNF716	0.00895	0.0961	3.42458	0.043	0.0399653	0.134378	FALSE	1118
PPP4R3A	0.0705	0.25	1.82623	0.277	0.291024	0.134018	FALSE	1119
CNGA1	0.0405	0.134	1.72624	0.097	0.100663	0.133615	FALSE	1120
UBE2G1	0.0532	0.431	3.01819	0.48	0.49065	0.133277	FALSE	1121
TBX15	0.0256	0.164	2.67948	0.146	0.154295	0.13311	FALSE	1122
RTN4RL2	0.0845	0.191	1.17655	0.19	0.201193	0.13301	FALSE	1123
CCL5	0.0959	0.213	1.15125	0.226	0.237825	0.132857	FALSE	1124
HOXC8	0.0302	0.112	1.89088	0.0655	0.0651978	0.132806	FALSE	1125
PPM1A	0.00138	0.0716	5.69722	0.0195	0.0139995	0.132738	FALSE	1126
GABPB1	0.473	0.282	-0.746145	0.324	0.338722	0.132584	FALSE	1127
OR2AP1	0.0278	0.101	1.8612	0.0515	0.0486984	0.132561	FALSE	1128
GDF11	0.116	0.232	1	0.257	0.268491	0.132488	FALSE	1129
MYH6	0.0256	0.148	2.53138	0.122	0.127596	0.132336	FALSE	1130
CAST	0.166	0.315	0.924169	0.367	0.380854	0.132061	FALSE	1131
KLHL15	0.0138	0.135	3.29022	0.101	0.105163	0.132048	FALSE	1132
WDR13	0.0177	0.146	3.04415	0.119	0.124663	0.132023	FALSE	1133
CCDC191	0.0348	0.151	2.11739	0.128	0.133562	0.132022	FALSE	1134
KRT83	0.0703	0.165	1.23087	0.151	0.158995	0.131772	FALSE	1135
MSL1	0.37	0.488	0.399356	0.53	0.537782	0.131464	FALSE	1136
FTCD	0.168	0.329	0.969626	0.385	0.398887	0.13132	FALSE	1137
FBXO47	0.218	0.313	0.521835	0.367	0.380854	0.131223	FALSE	1138
CDPF1	0.086	0.201	1.22479	0.211	0.222893	0.131033	FALSE	1139
TMOD4	0.123	0.225	0.871267	0.251	0.262025	0.130873	FALSE	1140
VSIG4	0.000645	0.123	7.57514	0.0844	0.0869638	0.130461	FALSE	1141
CBLC	0.0283	0.189	2.73951	0.193	0.204293	0.130362	FALSE	1142
WHAMM	0.402	0.233	-0.786866	0.264	0.276157	0.13021	FALSE	1143
ST3GAL6	0.0225	0.111	2.30256	0.0673	0.0673978	0.13002	FALSE	1144
SSX7	0.0567	0.188	1.72931	0.192	0.20356	0.129966	FALSE	1145
NES	0.107	0.201	0.909585	0.214	0.226026	0.129814	FALSE	1146
NCOA5	0.189	0.482	1.35065	0.531	0.538615	0.129524	FALSE	1147
GNS	0.0467	0.181	1.9545	0.182	0.192494	0.129521	FALSE	1148
FLOT1	0.211	0.311	0.559672	0.369	0.383354	0.1295	FALSE	1149
PUM2	0.0703	0.162	1.2044	0.151	0.158995	0.129376	FALSE	1150
MEIS1	0.0202	0.114	2.49661	0.0732	0.0738309	0.129021	FALSE	1151
MYO18A	0.317	0.424	0.419581	0.487	0.49735	0.128615	FALSE	1152
SLCO6A1	0.0094	0.0879	3.22513	0.0382	0.0347988	0.128196	FALSE	1153
SEPHS1	0.388	0.155	-1.32379	0.142	0.149262	0.128038	FALSE	1154
SPACA9	0.113	0.197	0.801873	0.213	0.224659	0.12775	FALSE	1155
SURF4	0.0394	0.173	2.1345	0.173	0.182694	0.127722	FALSE	1156
C1orf74	0.347	0.172	-1.01253	0.171	0.181027	0.127668	FALSE	1157
ALDH1B1	0.0235	0.109	2.2136	0.0675	0.0675311	0.127584	FALSE	1158
ISCA1	0.0821	0.24	1.54758	0.28	0.29429	0.127494	FALSE	1159
BRSK1	0.00918	0.129	3.81273	0.0987	0.102763	0.127473	FALSE	1160
IDE	0.0846	0.194	1.19733	0.21	0.221426	0.127026	FALSE	1161
POFUT1	0.0323	0.136	2.074	0.111	0.116529	0.126965	FALSE	1162
TRIO	0.024	0.264	3.45943	0.316	0.330856	0.126815	FALSE	1163
FCRL3	0.0284	0.106	1.9001	0.0643	0.0636312	0.126811	FALSE	1164
SLC41A2	0.0059	0.0783	3.73023	0.0294	0.0241325	0.126642	FALSE	1165
DEF8	0.024	0.151	2.65344	0.138	0.145062	0.126605	FALSE	1166
IL2RB	0.0168	0.0957	2.51006	0.0506	0.0476317	0.126525	FALSE	1167
KLHL7	0.104	0.318	1.61244	0.387	0.400787	0.126274	FALSE	1168
ST8SIA6	0.0212	0.116	2.45199	0.0797	0.0816639	0.126204	FALSE	1169
POU3F3	0.0781	0.175	1.16396	0.18	0.190094	0.126181	FALSE	1170
KIAA0586	0.035	0.159	2.1836	0.153	0.161095	0.126074	FALSE	1171
TMEM255B	0.00881	0.0929	3.39846	0.0473	0.0441652	0.125872	FALSE	1172
SLC13A2	0.0591	0.164	1.47247	0.163	0.171528	0.125569	FALSE	1173
FAHD2A	0.244	0.347	0.508055	0.421	0.434686	0.125553	FALSE	1174
CCDC36	0.248	0.369	0.573281	0.445	0.456885	0.125531	FALSE	1175
LRP5L	0.0593	0.167	1.49374	0.168	0.177227	0.125495	FALSE	1176
DBF4B	0.0514	0.167	1.70001	0.169	0.177927	0.125209	FALSE	1177
CHN2	0.02	0.089	2.15381	0.0421	0.0392987	0.1251	FALSE	1178
MGAT1	0.455	0.25	-0.863938	0.301	0.316023	0.12507	FALSE	1179
METTL7A	0.338	0.433	0.357344	0.505	0.514283	0.12505	FALSE	1180
ASPHD1	0.0628	0.2	1.67116	0.226	0.237825	0.124748	FALSE	1181
OR51I2	0.155	0.308	0.990662	0.38	0.393954	0.124603	FALSE	1182
H1FNT	0.0704	0.177	1.3301	0.187	0.198093	0.124454	FALSE	1183
ZNF79	0.05	0.322	2.68706	0.398	0.410953	0.124359	FALSE	1184
ATP1B3	0.361	0.141	-1.3563	0.126	0.131262	0.124342	FALSE	1185
INTS10	0.553	0.402	-0.460084	0.48	0.49065	0.12431	FALSE	1186
COL4A1	0.0199	0.23	3.53079	0.275	0.288524	0.124158	FALSE	1187
ACSM4	0.00212	0.0739	5.12344	0.0262	0.0209326	0.124091	FALSE	1188
CARD9	0.00378	0.0691	4.19223	0.0217	0.0160661	0.123972	FALSE	1189
OTP	0.0521	0.151	1.53519	0.144	0.151562	0.123731	FALSE	1190
ALDOC	0.0847	0.201	1.24676	0.231	0.243192	0.123424	FALSE	1191
RPS26	0.175	0.316	0.85257	0.394	0.40732	0.12326	FALSE	1192
NDUFS6	0.0195	0.0974	2.32045	0.0566	0.0544315	0.123128	FALSE	1193
TBX21	0.0809	0.172	1.0882	0.183	0.192994	0.122887	FALSE	1194
ATG3	0.0354	0.271	2.93647	0.338	0.352388	0.122757	FALSE	1195
BCAP31	0.229	0.378	0.723039	0.462	0.473818	0.122619	FALSE	1196
NXPE3	0.0107	0.0915	3.09616	0.0487	0.0457318	0.12259	FALSE	1197
ANHX	0.0433	0.17	1.9731	0.18	0.190094	0.122576	FALSE	1198
KLF11	0.0143	0.0884	2.62803	0.0442	0.0410653	0.122569	FALSE	1199
GCC2	0.00661	0.0736	3.47698	0.0271	0.0216326	0.122536	FALSE	1200
PRKD3	0.00452	0.144	4.9936	0.135	0.141429	0.122323	FALSE	1201
KRTAP17-1	0.0832	0.218	1.38967	0.263	0.275224	0.122148	FALSE	1202
ZC3HC1	0.236	0.406	0.782693	0.49	0.50025	0.12213	FALSE	1203
SFR1	0.173	0.293	0.760129	0.369	0.383354	0.122005	FALSE	1204
SFRP2	0.0346	0.124	1.8415	0.1	0.10403	0.121872	FALSE	1205
CD14	0.00716	0.133	4.21532	0.116	0.121463	0.121769	FALSE	1206
HINT2	0.0118	0.0874	2.88885	0.0438	0.040632	0.121585	FALSE	1207
SRXN1	0.111	0.359	1.69342	0.447	0.459218	0.121335	FALSE	1208
CSNK2A2	0.0106	0.113	3.41419	0.0822	0.0844972	0.121267	FALSE	1209
HAGHL	0.00853	0.0726	3.08935	0.0268	0.0214326	0.121164	FALSE	1210
UBXN1	0.0162	0.164	3.33963	0.173	0.182694	0.121077	FALSE	1211
NBR1	0.0521	0.171	1.71464	0.186	0.196193	0.120951	FALSE	1212
ZHX2	0.00516	0.087	4.07557	0.0442	0.0410653	0.120628	FALSE	1213
RASEF	0.0332	0.201	2.59794	0.239	0.251192	0.120599	FALSE	1214
SNRPB2	0.573	0.704	0.29704	0.669	0.674278	0.120498	FALSE	1215
LIFR	0.0114	0.0898	2.97768	0.0487	0.0457318	0.120312	FALSE	1216
MPV17L	0.14	0.239	0.771584	0.299	0.313856	0.120281	FALSE	1217
VDAC1	0.314	0.161	-0.963704	0.17	0.179161	0.120228	FALSE	1218
SULT1B1	0.0153	0.0951	2.63591	0.0566	0.0544315	0.120221	FALSE	1219
ERO1A	0.0141	0.0973	2.78674	0.0598	0.0581981	0.120174	FALSE	1220
SPAG17	0.0241	0.0912	1.92	0.051	0.0482651	0.120053	FALSE	1221
ADAP2	0.108	0.202	0.903324	0.244	0.254725	0.119974	FALSE	1222
OR6X1	0.00244	0.163	6.06185	0.174	0.183694	0.119953	FALSE	1223
ZBTB34	0.0288	0.336	3.54432	0.428	0.440452	0.11965	FALSE	1224
UBE2C	0.493	0.333	-0.566065	0.426	0.438585	0.119196	FALSE	1225
PPAT	0.488	0.265	-0.880889	0.342	0.355888	0.118902	FALSE	1226
ACTA1	0.141	0.228	0.693339	0.287	0.30109	0.118857	FALSE	1227
MINDY1	0.326	0.167	-0.965024	0.184	0.194394	0.11879	FALSE	1228
ZMYND8	0.561	0.416	-0.431417	0.509	0.518183	0.118775	FALSE	1229
ZNF222	0.0289	0.114	1.97989	0.0884	0.0909636	0.118689	FALSE	1230
TMEM187	0.0136	0.124	3.18866	0.106	0.11043	0.118657	FALSE	1231
MEMO1	0.311	0.455	0.548952	0.541	0.548915	0.118525	FALSE	1232
FZD9	0.0247	0.146	2.56339	0.146	0.154295	0.118501	FALSE	1233
ALDH1L1	0.0258	0.112	2.11806	0.0854	0.0880304	0.118201	FALSE	1234
TRAF6	0.0266	0.18	2.7585	0.21	0.221426	0.117859	FALSE	1235
C6orf136	0.0503	0.16	1.66944	0.174	0.183694	0.117745	FALSE	1236
HSD3B7	0.108	0.197	0.867164	0.241	0.252725	0.117678	FALSE	1237
ALKBH4	0.0453	0.131	1.53198	0.121	0.126396	0.117673	FALSE	1238
NCOA1	0.04	0.118	1.56071	0.097	0.100663	0.117661	FALSE	1239
ASB12	0.00653	0.118	4.17556	0.0972	0.100797	0.117593	FALSE	1240
CFAP61	0.00635	0.101	3.99145	0.0685	0.0685644	0.117554	FALSE	1241
LAD1	0.00489	0.0708	3.85584	0.0274	0.0218993	0.117498	FALSE	1242
GBE1	0.0138	0.214	3.95487	0.27	0.282757	0.117397	FALSE	1243
NCOA3	0.0393	0.182	2.21134	0.215	0.226726	0.117299	FALSE	1244
SOCS4	0.0241	0.133	2.46432	0.126	0.131262	0.117287	FALSE	1245
SIMC1	0.142	0.236	0.732896	0.304	0.319056	0.117087	FALSE	1246
ZNF460	0.0133	0.108	3.02153	0.0804	0.0826639	0.11693	FALSE	1247
MAP2K2	0.0851	0.181	1.08876	0.214	0.226026	0.116897	FALSE	1248
ATMIN	0.227	0.367	0.693088	0.469	0.480484	0.116824	FALSE	1249
ZBTB7A	0.43	0.547	0.347204	0.605	0.611546	0.116823	FALSE	1250
IQCC	0.215	0.302	0.490212	0.398	0.410953	0.116635	FALSE	1251
EDF1	0.00297	0.247	6.3779	0.323	0.337922	0.116382	FALSE	1252
FA2H	0.0448	0.25	2.48036	0.328	0.342922	0.116201	FALSE	1253
ACAD11	0.00357	0.0605	4.08294	0.0177	0.0121663	0.115848	FALSE	1254
MAP3K7	0.0116	0.438	5.23873	0.536	0.544015	0.115802	FALSE	1255
TMEM63A	0.032	0.201	2.65105	0.254	0.265424	0.115788	FALSE	1256
ZNF581	0.0285	0.108	1.922	0.0825	0.0847305	0.115772	FALSE	1257
LETMD1	0.0531	0.25	2.23514	0.33	0.344555	0.115685	FALSE	1258
FAM57B	0.162	0.246	0.602665	0.324	0.338722	0.115659	FALSE	1259
MAMDC2	0.0044	0.0646	3.87596	0.0219	0.0162661	0.115551	FALSE	1260
NME6	0.156	0.319	1.03201	0.421	0.434686	0.115422	FALSE	1261
TXNDC11	0.0263	0.105	1.99725	0.0776	0.079764	0.11531	FALSE	1262
TRAK2	0.0104	0.073	2.81131	0.0309	0.0263325	0.115304	FALSE	1263
TMEM95	0.0219	0.171	2.96499	0.201	0.211726	0.115293	FALSE	1264
CILP2	0.0687	0.229	1.73697	0.299	0.313856	0.115249	FALSE	1265
VPS54	0.468	0.605	0.370427	0.64	0.645512	0.115008	FALSE	1266
KCNC1	0.14	0.222	0.665133	0.289	0.30349	0.114964	FALSE	1267
NAT9	0.0118	0.0768	2.70232	0.036	0.0319989	0.114806	FALSE	1268
FAM122A	0.365	0.521	0.513387	0.597	0.602347	0.1147	FALSE	1269
CLPTM1	0.0849	0.335	1.98032	0.443	0.454685	0.114667	FALSE	1270
CCL19	0.0214	0.0993	2.21418	0.0704	0.070331	0.114478	FALSE	1271
RER1	0.189	0.319	0.75517	0.424	0.437719	0.114459	FALSE	1272
OR4P4	0.00919	0.0976	3.40874	0.0673	0.0673978	0.114324	FALSE	1273
ACSM1	0.00197	0.0633	5.00594	0.0215	0.0158328	0.113968	FALSE	1274
CCNJL	0.00796	0.0786	3.30369	0.0386	0.0355321	0.113921	FALSE	1275
CCDC87	0.0854	0.214	1.3253	0.28	0.29429	0.113682	FALSE	1276
ASB16	0.0953	0.223	1.2265	0.295	0.309756	0.113502	FALSE	1277
FPGS	0.414	0.24	-0.786596	0.322	0.336722	0.113455	FALSE	1278
GALK1	0.133	0.24	0.851608	0.322	0.336722	0.113455	FALSE	1279
DPPA3	0.191	0.28	0.551854	0.38	0.393954	0.113275	FALSE	1280
LARP4	0.333	0.477	0.518467	0.572	0.579081	0.113173	FALSE	1281
SULT1C2	0.0428	0.109	1.34865	0.0892	0.0915636	0.113172	FALSE	1282
SYP	0.00665	0.11	4.04801	0.0912	0.0937969	0.113059	FALSE	1283
PDE3A	0.00584	0.0891	3.93139	0.0561	0.0538982	0.113017	FALSE	1284
LILRB5	0.00794	0.143	4.17073	0.154	0.162195	0.112965	FALSE	1285
SH3GL3	0.104	0.215	1.04775	0.284	0.298357	0.112932	FALSE	1286
ZNFX1	0.0324	0.127	1.97076	0.124	0.129296	0.112829	FALSE	1287
GAS6	0.05	0.132	1.40054	0.134	0.140129	0.112658	FALSE	1288
RAB3GAP1	0.00865	0.254	4.87598	0.346	0.360688	0.112489	FALSE	1289
ADAM30	0.0937	0.184	0.973585	0.233	0.244759	0.112472	FALSE	1290
PCDH19	0.0222	0.129	2.53874	0.129	0.134696	0.112313	FALSE	1291
PTP4A1	0.0641	0.21	1.71199	0.278	0.29209	0.112241	FALSE	1292
IER3	0.158	0.256	0.696219	0.35	0.364388	0.11224	FALSE	1293
SDHAF1	0.323	0.446	0.46551	0.553	0.560581	0.112107	FALSE	1294
POU3F4	0.00192	0.109	5.82708	0.0912	0.0937969	0.112031	FALSE	1295
MAGEA3	0.0167	0.117	2.80859	0.106	0.11043	0.111959	FALSE	1296
SLC9A5	0.023	0.0967	2.07188	0.0698	0.0698643	0.11176	FALSE	1297
MTRNR2L3	0.0995	0.182	0.87117	0.231	0.243192	0.111757	FALSE	1298
EPN2	0.0105	0.0934	3.15303	0.0643	0.0636312	0.111737	FALSE	1299
SERPINB6	0.0101	0.0982	3.28137	0.0723	0.0728642	0.111701	FALSE	1300
SDR39U1	0.0283	0.153	2.43466	0.177	0.186494	0.111588	FALSE	1301
IRF2BP2	0.0784	0.27	1.78403	0.372	0.386154	0.111575	FALSE	1302
ITGB1BP2	0.00738	0.116	3.97436	0.105	0.109396	0.111476	FALSE	1303
EML2	0.0585	0.131	1.16306	0.135	0.141429	0.11128	FALSE	1304
ANKHD1	0.0504	0.221	2.13255	0.299	0.313856	0.111223	FALSE	1305
CA7	0.186	0.277	0.574583	0.383	0.396753	0.11121	FALSE	1306
SOX15	0.292	0.119	-1.29501	0.111	0.116529	0.111094	FALSE	1307
NRBF2	0.287	0.112	-1.35755	0.0987	0.102763	0.110674	FALSE	1308
HES2	0.0944	0.187	0.98618	0.246	0.256658	0.110451	FALSE	1309
HIST1H1A	0.0436	0.132	1.59814	0.139	0.146195	0.110229	FALSE	1310
TRIM45	0.0453	0.119	1.39338	0.113	0.118529	0.110215	FALSE	1311
PRICKLE1	0.0524	0.137	1.38654	0.149	0.156861	0.110214	FALSE	1312
CCR10	0.0492	0.154	1.6462	0.182	0.192494	0.1102	FALSE	1313
VDAC3	0.00832	0.0664	2.99653	0.0274	0.0218993	0.110195	FALSE	1314
GABRR1	0.00993	0.0755	2.92661	0.0382	0.0347988	0.110112	FALSE	1315
DTD2	0.294	0.404	0.458539	0.526	0.534149	0.110024	FALSE	1316
SYNE4	0.052	0.168	1.69188	0.21	0.221426	0.110002	FALSE	1317
CPZ	0.0275	0.0977	1.82893	0.0743	0.0749308	0.109946	FALSE	1318
OR4S1	0.0971	0.454	2.22515	0.566	0.573514	0.109621	FALSE	1319
TMEM87B	0.00789	0.0724	3.19789	0.0349	0.030699	0.109532	FALSE	1320
HRASLS	0.0127	0.0815	2.68197	0.0487	0.0457318	0.109192	FALSE	1321
HEXIM1	0.2	0.323	0.691534	0.447	0.459218	0.109168	FALSE	1322
SNX14	0.00895	0.0784	3.13089	0.0438	0.040632	0.109065	FALSE	1323
RIIAD1	0.026	0.0995	1.93618	0.0783	0.0802973	0.108982	FALSE	1324
HK2	0.205	0.327	0.673667	0.452	0.464285	0.108962	FALSE	1325
OST4	0.44	0.266	-0.726077	0.376	0.389387	0.108959	FALSE	1326
SUPT20H	0.235	0.492	1.066	0.594	0.600713	0.108896	FALSE	1327
RIMBP3	0.00921	0.142	3.94655	0.163	0.171528	0.108725	FALSE	1328
TFE3	0.00312	0.107	5.09992	0.0935	0.0966634	0.108577	FALSE	1329
NDUFA9	0.338	0.175	-0.949668	0.228	0.239959	0.108476	FALSE	1330
SLC22A9	0.0676	0.176	1.38048	0.23	0.241992	0.108451	FALSE	1331
MPI	0.0152	0.122	3.00474	0.124	0.129296	0.108387	FALSE	1332
VPS9D1	0.044	0.204	2.21299	0.28	0.29429	0.10837	FALSE	1333
RTN2	0.102	0.234	1.19794	0.33	0.344555	0.108281	FALSE	1334
SLC26A10	0.14	0.256	0.870717	0.363	0.377921	0.108185	FALSE	1335
AFM	0.0057	0.083	3.86408	0.0525	0.0498317	0.108107	FALSE	1336
TMEM160	0.023	0.179	2.96025	0.238	0.249858	0.107813	FALSE	1337
ACLY	0.496	0.158	-1.65042	0.197	0.207993	0.107748	FALSE	1338
P3H4	0.225	0.294	0.385891	0.417	0.430119	0.107725	FALSE	1339
TEKT2	0.317	0.175	-0.857128	0.231	0.243192	0.107459	FALSE	1340
TYW1B	0.264	0.154	-0.777608	0.19	0.201193	0.107244	FALSE	1341
TM2D3	0.12	0.493	2.03855	0.6	0.606146	0.107189	FALSE	1342
MEA1	0.0481	0.281	2.54646	0.403	0.415486	0.107186	FALSE	1343
TGFBR1	0.0532	0.277	2.38039	0.398	0.410953	0.10698	FALSE	1344
DNAJC15	0.00378	0.0583	3.94704	0.0201	0.0146995	0.106846	FALSE	1345
MPP3	0.245	0.388	0.663275	0.521	0.530516	0.106817	FALSE	1346
BOD1	0.0864	0.201	1.21809	0.28	0.29429	0.106776	FALSE	1347
CNTN3	0.00865	0.0872	3.33356	0.0609	0.059698	0.106736	FALSE	1348
MTERF2	0.0359	0.14	1.96337	0.164	0.172894	0.106711	FALSE	1349
HERPUD2	0.0525	0.142	1.4355	0.168	0.177227	0.106709	FALSE	1350
EFNA1	0.021	0.118	2.49033	0.119	0.124663	0.106703	FALSE	1351
GNRH2	0.0264	0.103	1.96403	0.0907	0.0928969	0.106296	FALSE	1352
UNC45B	0.0503	0.173	1.78214	0.231	0.243192	0.106231	FALSE	1353
CDC42SE1	0.319	0.101	-1.6592	0.0861	0.0888304	0.106195	FALSE	1354
NSMAF	0.027	0.0972	1.848	0.079	0.081264	0.105958	FALSE	1355
SAMD4A	0.26	0.347	0.416424	0.485	0.49525	0.105896	FALSE	1356
GRM3	0.00604	0.067	3.47154	0.0309	0.0263325	0.105827	FALSE	1357
ZNF696	0.153	0.256	0.742612	0.372	0.386154	0.105789	FALSE	1358
PPIP5K2	0.0807	0.257	1.67113	0.374	0.387754	0.105741	FALSE	1359
ZNF425	0.142	0.321	1.17668	0.457	0.468584	0.105677	FALSE	1360
EMP3	0.013	0.0798	2.61788	0.0506	0.0476317	0.105504	FALSE	1361
UROS	0.157	0.368	1.22894	0.508	0.516949	0.105451	FALSE	1362
PRR3	0.0199	0.253	3.6683	0.369	0.383354	0.105349	FALSE	1363
HES6	0.143	0.257	0.845753	0.376	0.389387	0.105272	FALSE	1364
FAM69B	0.0336	0.114	1.7625	0.114	0.119429	0.105209	FALSE	1365
TP53INP2	0.0104	0.153	3.87888	0.195	0.206026	0.10497	FALSE	1366
SUOX	0.14	0.228	0.703607	0.332	0.346688	0.104894	FALSE	1367
MFSD14C	0.137	0.223	0.702868	0.324	0.338722	0.104845	FALSE	1368
FLYWCH2	0.0892	0.182	1.02882	0.254	0.265424	0.104843	FALSE	1369
CTHRC1	0.00613	0.0759	3.63014	0.0447	0.0415986	0.104812	FALSE	1370
TMEM154	0.0261	0.0931	1.83473	0.0743	0.0749308	0.104769	FALSE	1371
UGT1A8	0.119	0.202	0.763394	0.289	0.30349	0.104607	FALSE	1372
GALNS	0.0132	0.0922	2.80423	0.073	0.0733976	0.104584	FALSE	1373
GRAP	0.0184	0.116	2.65635	0.12	0.125596	0.104519	FALSE	1374
C16orf87	0.0563	0.142	1.33468	0.174	0.183694	0.104499	FALSE	1375
SDF2L1	0.312	0.0759	-2.03937	0.0451	0.0419986	0.104496	FALSE	1376
SERF2	0.34	0.185	-0.878009	0.261	0.272858	0.104352	FALSE	1377
SLC35A3	0.0564	0.146	1.3722	0.183	0.192994	0.104311	FALSE	1378
TNIP1	0.0175	0.277	3.98446	0.407	0.420553	0.104202	FALSE	1379
SLC9A7	0.00953	0.105	3.46177	0.0984	0.102063	0.104069	FALSE	1380
BLOC1S6	0.0225	0.121	2.42701	0.132	0.138529	0.103874	FALSE	1381
AARD	0.081	0.179	1.14397	0.252	0.262891	0.10386	FALSE	1382
OR1Q1	0.0417	0.113	1.4382	0.115	0.120563	0.103823	FALSE	1383
XAGE1A	0.00309	0.1	5.01625	0.09	0.0924303	0.103419	FALSE	1384
PCSK9	0.283	0.363	0.359167	0.51	0.519083	0.103369	FALSE	1385
SH3GLB2	0.0389	0.31	2.99443	0.452	0.464285	0.103297	FALSE	1386
ROBO4	0.00239	0.0685	4.84102	0.0353	0.0311323	0.103215	FALSE	1387
EMX1	0.0444	0.122	1.45825	0.136	0.143129	0.103001	FALSE	1388
TIGIT	0.0333	0.102	1.61498	0.0946	0.0978301	0.102972	FALSE	1389
USP6	0.245	0.351	0.518689	0.5	0.50925	0.102867	FALSE	1390
POM121C	0.213	0.35	0.716501	0.5	0.50925	0.102574	FALSE	1391
RBM15B	0.0248	0.125	2.33352	0.144	0.151562	0.102426	FALSE	1392
OR5H1	0.0872	0.17	0.963135	0.238	0.249858	0.102392	FALSE	1393
ERBB4	0.0121	0.085	2.81246	0.0632	0.0624313	0.102391	FALSE	1394
AKAP13	0.0141	0.0795	2.49526	0.054	0.0515983	0.102345	FALSE	1395
HBA1	0.000197	0.0618	8.29327	0.0276	0.0221326	0.102277	FALSE	1396
GADD45G	0.0328	0.103	1.65088	0.0979	0.101697	0.102247	FALSE	1397
HMGCL	0.0258	0.104	2.01114	0.1	0.10403	0.102216	FALSE	1398
LIPT1	0.113	0.33	1.54614	0.48	0.49065	0.102045	FALSE	1399
GOLGA8H	0.0357	0.111	1.63656	0.115	0.120563	0.101985	FALSE	1400
INA	0.0266	0.227	3.09319	0.342	0.355888	0.101852	FALSE	1401
LRRC66	0.00461	0.0539	3.54745	0.0185	0.0128996	0.10184	FALSE	1402
TXLNG	0.0201	0.13	2.69324	0.157	0.164861	0.101775	FALSE	1403
ITGAM	0.0232	0.115	2.30944	0.125	0.130429	0.101732	FALSE	1404
SDSL	0.0259	0.0931	1.84583	0.079	0.081264	0.101488	FALSE	1405
TBKBP1	0.182	0.263	0.531124	0.4	0.41252	0.101138	FALSE	1406
TRIM52	0.0189	0.0823	2.12251	0.0604	0.059098	0.1011	FALSE	1407
REST	0.063	0.151	1.26112	0.203	0.214193	0.101048	FALSE	1408
UBXN7	0.045	0.129	1.51937	0.157	0.164861	0.100992	FALSE	1409
PROKR2	0.0245	0.105	2.09954	0.105	0.109396	0.100905	FALSE	1410
OS9	0.166	0.246	0.567475	0.376	0.389387	0.100766	FALSE	1411
MANBAL	0.0267	0.146	2.45106	0.193	0.204293	0.100703	FALSE	1412
KIFC1	0.0742	0.264	1.83105	0.403	0.415486	0.100701	FALSE	1413
UBE2J2	0.333	0.199	-0.742754	0.297	0.311956	0.100675	FALSE	1414
C2orf40	0.00243	0.0576	4.56704	0.0236	0.0179327	0.10059	FALSE	1415
FLII	0.482	0.59	0.291682	0.672	0.675711	0.100441	FALSE	1416
AADACL4	0.0122	0.0763	2.6448	0.051	0.0482651	0.100439	FALSE	1417
CCDC106	0.284	0.142	-1	0.186	0.196193	0.100439	FALSE	1418
MFRP	0.00832	0.0704	3.08092	0.0405	0.0375987	0.100308	FALSE	1419
ITGAV	0.495	0.56	0.177998	0.657	0.662145	0.100266	FALSE	1420
TRMT10A	0.0156	0.101	2.69474	0.0979	0.101697	0.100262	FALSE	1421
GNG3	0.199	0.337	0.75998	0.495	0.50435	0.100179	FALSE	1422
REEP1	0.255	0.15	-0.765535	0.204	0.214893	0.100167	FALSE	1423
FGFBP3	0.0267	0.213	2.99594	0.324	0.338722	0.100143	FALSE	1424
RP2	0.0109	0.106	3.28166	0.109	0.113996	0.0999696	FALSE	1425
ASIC4	0.0514	0.121	1.23517	0.142	0.149262	0.0999522	FALSE	1426
RGS3	0.0409	0.229	2.48517	0.352	0.366188	0.0999118	FALSE	1427
ZNF680	0.108	0.25	1.2109	0.384	0.39862	0.0998602	FALSE	1428
KIF20B	0.292	0.0828	-1.81827	0.0632	0.0624313	0.0997407	FALSE	1429
LCN6	0.171	0.342	1	0.502	0.511216	0.0996572	FALSE	1430
PRDM8	0.0111	0.125	3.4933	0.152	0.159628	0.0996114	FALSE	1431
SLC27A5	0.0937	0.307	1.71212	0.462	0.473818	0.0995874	FALSE	1432
SLC25A19	0.179	0.309	0.787647	0.465	0.476217	0.0995582	FALSE	1433
EFCAB13	0.0163	0.151	3.2116	0.208	0.219226	0.0995253	FALSE	1434
PRUNE1	0.227	0.326	0.52218	0.485	0.49525	0.0994872	FALSE	1435
CSPG5	0.0636	0.175	1.46026	0.259	0.270491	0.0993733	FALSE	1436
LSM1	0.0294	0.127	2.11094	0.158	0.166428	0.0989043	FALSE	1437
CPLANE1	0.0629	0.17	1.4344	0.251	0.262025	0.0988818	FALSE	1438
TECRL	0.00352	0.071	4.33417	0.0438	0.040632	0.0987704	FALSE	1439
OR4X1	0.0477	0.166	1.79912	0.244	0.254725	0.0985922	FALSE	1440
AKT1	0.00948	0.0877	3.20962	0.0749	0.0756975	0.0983046	FALSE	1441
PTGES3	0.0581	0.172	1.5658	0.257	0.268491	0.0982241	FALSE	1442
KRT31	0.185	0.274	0.566651	0.426	0.438585	0.0980772	FALSE	1443
STARD3	0.0869	0.269	1.63018	0.419	0.432219	0.0979957	FALSE	1444
GNPTAB	0.0601	0.164	1.44826	0.241	0.252725	0.0979657	FALSE	1445
NAA40	0.284	0.359	0.338093	0.525	0.533916	0.0978374	FALSE	1446
JSRP1	0.095	0.251	1.40169	0.396	0.408886	0.0974877	FALSE	1447
DPM1	0.184	0.371	1.01171	0.539	0.546048	0.0974872	FALSE	1448
VPS16	0.331	0.132	-1.32629	0.173	0.182694	0.0974524	FALSE	1449
VASP	0.0227	0.142	2.64513	0.195	0.206026	0.0974229	FALSE	1450
MFSD8	0.0295	0.0889	1.59147	0.0783	0.0802973	0.0973721	FALSE	1451
C15orf40	0.081	0.175	1.11136	0.266	0.278024	0.0972856	FALSE	1452
DAOA	0.0103	0.076	2.88336	0.055	0.0526316	0.0971853	FALSE	1453
AKR7A3	0.249	0.102	-1.28758	0.107	0.111496	0.0971794	FALSE	1454
FAF1	0.0686	0.155	1.17599	0.225	0.236592	0.09703	FALSE	1455
TRIM28	0.133	0.369	1.47219	0.539	0.546048	0.0969617	FALSE	1456
DDX53	0.0106	0.105	3.30825	0.114	0.119429	0.0969033	FALSE	1457
CPT1C	0.00556	0.0592	3.41244	0.0285	0.0231992	0.096764	FALSE	1458
DCST1	0.0667	0.241	1.85327	0.383	0.396753	0.0967565	FALSE	1459
LENG9	0.00853	0.0905	3.4073	0.0832	0.0852972	0.0967504	FALSE	1460
SLC25A51	0.00936	0.156	4.05889	0.228	0.239959	0.0966987	FALSE	1461
WNK4	0.0828	0.146	0.818266	0.207	0.217826	0.096636	FALSE	1462
APBB3	0.0218	0.0786	1.8502	0.0604	0.059098	0.0965544	FALSE	1463
CLPS	0.344	0.229	-0.587061	0.365	0.378821	0.0965387	FALSE	1464
RAX	0.0363	0.116	1.67608	0.14	0.147295	0.0964902	FALSE	1465
TSR3	0.0282	0.245	3.11901	0.391	0.40402	0.0964313	FALSE	1466
PSPC1	0.283	0.109	-1.37647	0.125	0.130429	0.0964242	FALSE	1467
LMTK2	0.0439	0.138	1.65238	0.189	0.20026	0.09638	FALSE	1468
FUT11	0.0471	0.122	1.37308	0.154	0.162195	0.0963756	FALSE	1469
SETDB2	0.00974	0.334	5.09978	0.506	0.51465	0.0963551	FALSE	1470
NCALD	0.0594	0.14	1.23689	0.194	0.205126	0.096317	FALSE	1471
LIN9	0.00919	0.0783	3.09088	0.0604	0.059098	0.0961858	FALSE	1472
DET1	0.273	0.405	0.569021	0.572	0.579081	0.0960907	FALSE	1473
TAB2	0.01	0.0771	2.94673	0.0587	0.0567981	0.0960409	FALSE	1474
PAGE2B	0.0358	0.122	1.76885	0.155	0.163261	0.0960283	FALSE	1475
GCH1	0.0267	0.203	2.92657	0.322	0.336722	0.0959639	FALSE	1476
BBOF1	0.0247	0.0845	1.77444	0.073	0.0733976	0.0958499	FALSE	1477
TRIP13	0.3	0.162	-0.888969	0.246	0.256658	0.0956845	FALSE	1478
CDH1	0.0389	0.137	1.81633	0.189	0.20026	0.0956816	FALSE	1479
GRINA	0.124	0.195	0.653134	0.308	0.323189	0.0956559	FALSE	1480
C9orf47	0.0122	0.0824	2.75576	0.0692	0.0691644	0.0955937	FALSE	1481
ZNF142	0.0215	0.145	2.75364	0.208	0.219226	0.0955706	FALSE	1482
C22orf23	0.0917	0.155	0.757275	0.23	0.241992	0.0955109	FALSE	1483
CEACAM19	0.0179	0.14	2.9674	0.197	0.207993	0.0954732	FALSE	1484
POLG	0.389	0.183	-1.08793	0.287	0.30109	0.0953986	FALSE	1485
TTLL6	0.0347	0.0988	1.50958	0.104	0.10833	0.0953669	FALSE	1486
GLA	0.0122	0.102	3.06362	0.111	0.116529	0.0952236	FALSE	1487
IRS4	0.0313	0.131	2.06533	0.178	0.188094	0.095057	FALSE	1488
ORAI3	0.0957	0.199	1.05618	0.318	0.333222	0.0949759	FALSE	1489
DNAJB6	0.377	0.0813	-2.21324	0.0679	0.0681977	0.0948145	FALSE	1490
ITPK1	0.046	0.159	1.78932	0.242	0.253425	0.094788	FALSE	1491
C2CD4D	0.0201	0.138	2.7794	0.195	0.206026	0.0946786	FALSE	1492
GPAT2	0.347	0.245	-0.502154	0.398	0.410953	0.0946209	FALSE	1493
GIT2	0.0212	0.0868	2.03363	0.0797	0.0816639	0.0944358	FALSE	1494
RNASE1	0.0139	0.0872	2.64924	0.0804	0.0826639	0.09441	FALSE	1495
SMARCD1	0.0695	0.357	2.36084	0.536	0.544015	0.0943869	FALSE	1496
IFT140	0.158	0.239	0.597086	0.389	0.40292	0.0943527	FALSE	1497
ATXN1L	0.0215	0.182	3.08153	0.289	0.30349	0.0942498	FALSE	1498
SAMD14	0.064	0.162	1.33985	0.251	0.262025	0.0942286	FALSE	1499
CASTOR2	0.00321	0.0569	4.14778	0.0276	0.0221326	0.0941677	FALSE	1500
FUS	0.0218	0.116	2.41172	0.146	0.154295	0.0941512	FALSE	1501
ATRN	0.0227	0.102	2.1678	0.114	0.119429	0.0941347	FALSE	1502
MBOAT4	0.00866	0.094	3.44022	0.0962	0.0997967	0.0940831	FALSE	1503
ENKD1	0.15	0.273	0.863938	0.44	0.452252	0.0940812	FALSE	1504
FAM104B	0.475	0.233	-1.0276	0.381	0.39482	0.094039	FALSE	1505
KLF16	0.177	0.382	1.10982	0.561	0.567481	0.0939906	FALSE	1506
ZNF587	0.0138	0.0928	2.74946	0.0938	0.0971301	0.0939736	FALSE	1507
APRT	0.111	0.202	0.863796	0.328	0.342922	0.0938906	FALSE	1508
HDDC3	0.0388	0.122	1.65275	0.162	0.170294	0.0937936	FALSE	1509
SOX3	0.0533	0.146	1.45376	0.216	0.227826	0.09379	FALSE	1510
TEKT5	0.0135	0.275	4.3484	0.445	0.456885	0.0935532	FALSE	1511
CCR7	0.0162	0.0775	2.2582	0.0632	0.0624313	0.0933563	FALSE	1512
NEK5	0.024	0.085	1.82443	0.0776	0.079764	0.0933464	FALSE	1513
MAN1C1	0.0273	0.115	2.07466	0.146	0.154295	0.0933396	FALSE	1514
NEUROG3	0.23	0.119	-0.950672	0.156	0.164328	0.0933304	FALSE	1515
NPIPB13	0.379	0.256	-0.566054	0.419	0.432219	0.0932598	FALSE	1516
MYLK3	0.00249	0.0595	4.57867	0.0316	0.0271324	0.0932074	FALSE	1517
GPS2	0.00835	0.123	3.88074	0.166	0.174894	0.0931386	FALSE	1518
PCDHGB4	0.0328	0.0934	1.50973	0.097	0.100663	0.0931318	FALSE	1519
VAV3	0.00947	0.0718	2.92255	0.053	0.050465	0.0931253	FALSE	1520
DCHS1	0.0114	0.0605	2.4079	0.0336	0.0291324	0.0929053	FALSE	1521
PLK2	0.00427	0.0663	3.9567	0.0426	0.039732	0.092877	FALSE	1522
EEF1E1	0.28	0.0756	-1.88897	0.0604	0.059098	0.0928691	FALSE	1523
CFAP45	0.00849	0.0825	3.28056	0.0743	0.0749308	0.0928405	FALSE	1524
CR1L	0.302	0.162	-0.898555	0.256	0.267424	0.0927934	FALSE	1525
FDCSP	0.00737	0.122	4.04907	0.165	0.173894	0.0926852	FALSE	1526
CNP	0.249	0.106	-1.23208	0.128	0.133562	0.0926775	FALSE	1527
SMG7	0.584	0.0777	-2.90998	0.0649	0.0643312	0.0925856	FALSE	1528
AFDN	0.0586	0.152	1.3751	0.234	0.245992	0.0925801	FALSE	1529
ATF5	0.14	0.212	0.598637	0.352	0.366188	0.0924948	FALSE	1530
FAM220A	0.0352	0.117	1.73286	0.154	0.162195	0.0924257	FALSE	1531
ZKSCAN2	0.045	0.155	1.78427	0.242	0.253425	0.0924034	FALSE	1532
ZNF500	0.0242	0.252	3.38034	0.417	0.430119	0.0923357	FALSE	1533
RNF135	0.0127	0.0719	2.50116	0.0545	0.0520316	0.0923004	FALSE	1534
ARL14EP	0.00298	0.0718	4.5906	0.0545	0.0520316	0.092172	FALSE	1535
SPIN2B	0.0013	0.0908	6.12611	0.0935	0.0966634	0.0921382	FALSE	1536
ARHGAP23	0.273	0.101	-1.43455	0.117	0.122496	0.0920997	FALSE	1537
FABP7	0.0237	0.0752	1.66585	0.0609	0.059698	0.0920478	FALSE	1538
RERE	0.0198	0.139	2.81151	0.207	0.217826	0.0920027	FALSE	1539
BACE1	0.0571	0.12	1.07147	0.163	0.171528	0.0918799	FALSE	1540
SSB	0.396	0.258	-0.618129	0.428	0.440452	0.0918742	FALSE	1541
SCGB1D2	0.0398	0.149	1.90447	0.23	0.241992	0.0918137	FALSE	1542
GATAD2A	0.408	0.476	0.222392	0.635	0.641445	0.091792	FALSE	1543
ADGRL3	0.0185	0.0809	2.12861	0.073	0.0733976	0.0917664	FALSE	1544
PRKAR2A	0.245	0.0776	-1.65865	0.0661	0.0659311	0.0916386	FALSE	1545
ZNF296	0.0104	0.0688	2.72583	0.0496	0.0465984	0.091616	FALSE	1546
ZNF169	0.223	0.34	0.608491	0.531	0.538615	0.0913652	FALSE	1547
RTL5	0.112	0.196	0.807355	0.327	0.342455	0.0912176	FALSE	1548
TRPC3	0.0124	0.0911	2.87711	0.0962	0.0997967	0.0911805	FALSE	1549
KRTAP4-4	0.0688	0.135	0.972479	0.2	0.211226	0.091159	FALSE	1550
NFKBID	0.0241	0.0866	1.84533	0.0861	0.0888304	0.0910546	FALSE	1551
SLC38A2	0.189	0.367	0.957394	0.558	0.565114	0.0909659	FALSE	1552
SLC13A3	0.0084	0.0719	3.09753	0.0566	0.0544315	0.0908924	FALSE	1553
PRSS33	0.0156	0.15	3.26534	0.236	0.247958	0.0908432	FALSE	1554
CLIC3	0.0061	0.088	3.85062	0.0907	0.0928969	0.0908159	FALSE	1555
RDX	0.0102	0.0566	2.47223	0.03	0.0249992	0.0906774	FALSE	1556
ZNF728	0.309	0.169	-0.870584	0.277	0.291024	0.0905961	FALSE	1557
CYP8B1	0.00707	0.0532	2.91164	0.0254	0.019866	0.0905405	FALSE	1558
CARD6	0.0259	0.134	2.37121	0.2	0.211226	0.0904838	FALSE	1559
TTC24	0.0506	0.14	1.46822	0.214	0.226026	0.0904179	FALSE	1560
MVP	0.0162	0.256	3.98208	0.431	0.443519	0.0903906	FALSE	1561
CITED2	0.0276	0.116	2.07138	0.158	0.166428	0.0903378	FALSE	1562
SLC12A4	0.0473	0.24	2.34312	0.407	0.420553	0.0902831	FALSE	1563
HBZ	0.00259	0.0978	5.23881	0.114	0.119429	0.0902585	FALSE	1564
PPP6R2	0.161	0.361	1.16494	0.555	0.562315	0.0902575	FALSE	1565
CNIH1	0.105	0.198	0.915111	0.336	0.350522	0.0901465	FALSE	1566
SLC6A8	0.0294	0.144	2.29218	0.225	0.236592	0.090144	FALSE	1567
PDZD3	0.0496	0.232	2.22571	0.396	0.408886	0.0901082	FALSE	1568
FAM162A	0.0375	0.112	1.57854	0.149	0.156861	0.0901022	FALSE	1569
GYG2	0.00701	0.0921	3.71571	0.101	0.105163	0.0900864	FALSE	1570
BICD1	0.0711	0.162	1.18807	0.266	0.278024	0.0900587	FALSE	1571
SEC31B	0.00233	0.132	5.82406	0.197	0.207993	0.0900176	FALSE	1572
RALA	0.0485	0.117	1.27045	0.162	0.170294	0.0899496	FALSE	1573
TMEM38A	0.117	0.206	0.816136	0.352	0.366188	0.089877	FALSE	1574
LARP1	0.353	0.468	0.40684	0.637	0.642812	0.0898167	FALSE	1575
MLNR	0.00602	0.0605	3.3291	0.0364	0.0328322	0.0897638	FALSE	1576
FBXO33	0.0174	0.0823	2.24181	0.079	0.081264	0.0897154	FALSE	1577
MAP1LC3B	0.238	0.108	-1.13993	0.141	0.147895	0.089645	FALSE	1578
CSN2	0.0274	0.0987	1.84887	0.118	0.123529	0.0896423	FALSE	1579
LYPLA2	0.0892	0.176	0.98046	0.295	0.309756	0.0895804	FALSE	1580
IRGQ	0.00533	0.0516	3.27516	0.0239	0.0183661	0.0895768	FALSE	1581
NTSR2	0.0436	0.124	1.50794	0.18	0.190094	0.089408	FALSE	1582
PDGFRL	0.0239	0.142	2.57081	0.223	0.234692	0.0893892	FALSE	1583
MPG	0.0272	0.0926	1.76741	0.104	0.10833	0.0893824	FALSE	1584
TAF9	0.011	0.0721	2.7125	0.0593	0.0576314	0.0893565	FALSE	1585
PPP1R14A	0.0301	0.118	1.97095	0.166	0.174894	0.0893525	FALSE	1586
FMNL1	0.123	0.191	0.634914	0.326	0.340722	0.0893116	FALSE	1587
PCMTD1	0.0299	0.126	2.07521	0.186	0.196193	0.0891217	FALSE	1588
AEN	0.00368	0.101	4.77851	0.126	0.131262	0.0890679	FALSE	1589
PPP2R5E	0.0161	0.205	3.67049	0.354	0.367821	0.0890445	FALSE	1590
MYF6	0.0194	0.0772	1.99254	0.0704	0.070331	0.0890003	FALSE	1591
MEAF6	0.298	0.129	-1.20794	0.193	0.204293	0.0889772	FALSE	1592
SRSF9	0.0444	0.121	1.44638	0.175	0.184994	0.088674	FALSE	1593
GRASP	0.238	0.298	0.324351	0.495	0.50435	0.0885859	FALSE	1594
DEFB116	0.0232	0.0877	1.91845	0.0946	0.0978301	0.0885356	FALSE	1595
NPTXR	0.0155	0.0766	2.30508	0.0698	0.0698643	0.08853	FALSE	1596
FUT4	0.0318	0.243	2.93386	0.419	0.432219	0.088524	FALSE	1597
SPANXA2	0.057	0.137	1.26514	0.214	0.226026	0.0884804	FALSE	1598
HIST1H4G	0.0607	0.191	1.6538	0.33	0.344555	0.0883836	FALSE	1599
ZSCAN22	0.00592	0.0564	3.25203	0.0316	0.0271324	0.0883512	FALSE	1600
PARD3	0.0428	0.151	1.81887	0.249	0.259958	0.0883496	FALSE	1601
SLC35F5	0.00501	0.0582	3.53814	0.0346	0.0303657	0.0883253	FALSE	1602
IRF6	0.0698	0.145	1.05475	0.234	0.245992	0.0883165	FALSE	1603
FBLN7	0.0292	0.0874	1.58166	0.0946	0.0978301	0.0882327	FALSE	1604
GOLGA2	0.167	0.362	1.11614	0.564	0.570648	0.0881948	FALSE	1605
PAFAH1B3	0.0504	0.152	1.59258	0.252	0.262891	0.088194	FALSE	1606
SNX1	0.0203	0.0892	2.13556	0.0987	0.102763	0.0881441	FALSE	1607
SZT2	0.0632	0.281	2.15257	0.474	0.485684	0.0881346	FALSE	1608
SETD9	0.0397	0.108	1.44382	0.145	0.152995	0.0880549	FALSE	1609
TMCO6	0.166	0.27	0.701776	0.46	0.471951	0.0880479	FALSE	1610
GOLGA7B	0.0305	0.149	2.28843	0.246	0.256658	0.0880061	FALSE	1611
MRPL30	0.266	0.355	0.416393	0.558	0.565114	0.0879916	FALSE	1612
PSTPIP1	0.0108	0.0745	2.78621	0.0661	0.0659311	0.0879778	FALSE	1613
HNRNPCL4	0.334	0.24	-0.476814	0.417	0.430119	0.0879387	FALSE	1614
HOMER3	0.254	0.125	-1.0229	0.187	0.198093	0.0878913	FALSE	1615
RGN	0.00747	0.0871	3.54349	0.0947	0.0979301	0.0878912	FALSE	1616
TMEM60	0.000626	0.0481	6.26373	0.0206	0.0148995	0.0878704	FALSE	1617
KLK13	0.0113	0.0826	2.86982	0.0839	0.0864305	0.0878313	FALSE	1618
ADA2	0.0194	0.145	2.90192	0.236	0.247958	0.0878151	FALSE	1619
SLC38A4	0.0122	0.0674	2.46587	0.0525	0.0498317	0.0877881	FALSE	1620
SPEM1	0.0646	0.13	1.00891	0.2	0.211226	0.0877828	FALSE	1621
EIF4G3	0.0764	0.213	1.47921	0.374	0.387754	0.0876376	FALSE	1622
CXCL6	0.00285	0.0713	4.64487	0.0604	0.059098	0.0875868	FALSE	1623
HIST1H2AJ	0.306	0.152	-1.00946	0.254	0.265424	0.087561	FALSE	1624
MARVELD2	0.00655	0.0886	3.75774	0.0987	0.102763	0.0875512	FALSE	1625
MRTFB	0.00178	0.0511	4.84337	0.0248	0.019366	0.0875322	FALSE	1626
ATXN10	0.212	0.296	0.481533	0.497	0.506416	0.0874657	FALSE	1627
KIAA0100	0.225	0.468	1.05658	0.646	0.650445	0.0874175	FALSE	1628
XRCC4	0.215	0.299	0.475809	0.502	0.511216	0.0871272	FALSE	1629
RALGPS1	0.166	0.248	0.579157	0.433	0.445518	0.0870813	FALSE	1630
ERLIN2	0.00774	0.0776	3.32565	0.0749	0.0756975	0.0869833	FALSE	1631
SPECC1L	0.0304	0.109	1.84218	0.152	0.159628	0.0868611	FALSE	1632
ZCCHC3	0.00284	0.0496	4.12638	0.0236	0.0179327	0.0866191	FALSE	1633
TXNRD1	0.78	0.681	-0.195819	0.744	0.746142	0.0866086	FALSE	1634
CNOT10	0.077	0.183	1.24891	0.322	0.336722	0.0865093	FALSE	1635
BZW1	0.00422	0.0542	3.68298	0.0303	0.0253658	0.0864897	FALSE	1636
STX10	0.134	0.241	0.8468	0.424	0.437719	0.086472	FALSE	1637
ZNF174	0.264	0.145	-0.864485	0.242	0.253425	0.0864419	FALSE	1638
HIGD1B	0.0212	0.0725	1.77392	0.0649	0.0643312	0.0863894	FALSE	1639
HSPA13	0.0506	0.428	3.0804	0.622	0.628346	0.086371	FALSE	1640
WDR62	0.0942	0.332	1.81738	0.542	0.549382	0.0863618	FALSE	1641
GGT7	0.0244	0.137	2.48922	0.223	0.234692	0.0862417	FALSE	1642
PLEKHA8	0.00422	0.0543	3.68564	0.0306	0.0258991	0.0861586	FALSE	1643
FRRS1L	0.0107	0.0684	2.67639	0.0571	0.0550648	0.0861242	FALSE	1644
IDNK	0.0104	0.0726	2.80339	0.0655	0.0651978	0.0860867	FALSE	1645
CLPX	0.115	0.24	1.0614	0.426	0.438585	0.085907	FALSE	1646
RAB22A	0.081	0.159	0.973033	0.275	0.288524	0.0858311	FALSE	1647
STT3A	0.14	0.309	1.14218	0.518	0.527649	0.0857953	FALSE	1648
EPC1	0.311	0.412	0.40573	0.614	0.619246	0.0857524	FALSE	1649
TTPAL	0.0169	0.0741	2.13245	0.0698	0.0698643	0.0856407	FALSE	1650
SOX17	0.00201	0.0728	5.17867	0.0667	0.0666311	0.0856363	FALSE	1651
RMND1	0.158	0.25	0.662004	0.443	0.454685	0.0855724	FALSE	1652
LIMA1	0.036	0.109	1.59826	0.156	0.164328	0.0854875	FALSE	1653
TRIM2	0.00486	0.0585	3.58941	0.0382	0.0347988	0.0853185	FALSE	1654
CEBPD	0.0296	0.125	2.07826	0.197	0.207993	0.0852439	FALSE	1655
LIPE	0.0373	0.133	1.83418	0.217	0.228759	0.0852027	FALSE	1656
LMAN2	0.245	0.133	-0.881356	0.217	0.228759	0.0852027	FALSE	1657
TMED9	0.19	0.277	0.543887	0.482	0.49255	0.0851912	FALSE	1658
PIGB	0.283	0.089	-1.66892	0.106	0.11043	0.0851654	FALSE	1659
DMKN	0.266	0.346	0.379346	0.561	0.567481	0.0851328	FALSE	1660
PCDHB10	0.0172	0.0672	1.96605	0.0566	0.0544315	0.0849508	FALSE	1661
ZNF155	0.152	0.23	0.597563	0.414	0.427319	0.084927	FALSE	1662
HIST1H1E	0.3	0.106	-1.5009	0.15	0.158195	0.0848856	FALSE	1663
C8orf37	0.02	0.0734	1.87578	0.0698	0.0698643	0.0848316	FALSE	1664
SRD5A3	0.346	0.26	-0.41226	0.46	0.471951	0.0847868	FALSE	1665
UFC1	0.0865	0.185	1.09675	0.334	0.348522	0.0846875	FALSE	1666
LRRC3C	0.137	0.416	1.60241	0.62	0.626046	0.0846119	FALSE	1667
VIPR2	0.027	0.0987	1.87009	0.133	0.138962	0.0845961	FALSE	1668
ZNF536	0.0478	0.127	1.40975	0.205	0.216126	0.0844922	FALSE	1669
CDH6	0.00605	0.065	3.42543	0.053	0.050465	0.0843056	FALSE	1670
RNF38	0.00642	0.0805	3.64834	0.0876	0.0902303	0.0840941	FALSE	1671
EFNA2	0.0783	0.149	0.928228	0.261	0.272858	0.0840455	FALSE	1672
NR6A1	0.0615	0.3	2.2863	0.515	0.524783	0.0840062	FALSE	1673
MED15	0.213	0.386	0.857747	0.6	0.606146	0.0839251	FALSE	1674
RELA	0.31	0.51	0.718229	0.681	0.685144	0.0837513	FALSE	1675
TP53BP2	0.0249	0.139	2.48087	0.238	0.249858	0.0837206	FALSE	1676
DUSP9	0.00421	0.0859	4.35077	0.102	0.10603	0.0837157	FALSE	1677
TDP2	0.0867	0.208	1.26248	0.382	0.395887	0.0837052	FALSE	1678
HELZ	0.0354	0.177	2.32193	0.322	0.336722	0.0836729	FALSE	1679
ZNF91	0.111	0.194	0.805497	0.357	0.371454	0.0834384	FALSE	1680
GAGE12H	0.0399	0.121	1.60055	0.194	0.205126	0.0832454	FALSE	1681
HEXDC	0.027	0.203	2.91045	0.376	0.389387	0.0831526	FALSE	1682
FANCF	0.365	0.274	-0.413721	0.487	0.49735	0.0831146	FALSE	1683
CNBD2	0.0412	0.115	1.48092	0.179	0.18936	0.0831118	FALSE	1684
FAM156B	0.0333	0.122	1.87329	0.198	0.208593	0.0830454	FALSE	1685
ST7	0.0308	0.0907	1.55817	0.116	0.121463	0.0830411	FALSE	1686
MBD3L2	0.254	0.133	-0.933402	0.226	0.237825	0.0829577	FALSE	1687
VPS45	0.379	0.0786	-2.2696	0.0854	0.0880304	0.0829519	FALSE	1688
XCR1	0.0409	0.0892	1.12494	0.112	0.117596	0.082921	FALSE	1689
PITPNM3	0.0244	0.087	1.83413	0.107	0.111496	0.0828883	FALSE	1690
ANKRD13A	0.0262	0.136	2.37597	0.234	0.245992	0.0828348	FALSE	1691
CTPS2	0.017	0.0882	2.37524	0.11	0.115429	0.0827037	FALSE	1692
CENPF	0.225	0.421	0.903895	0.631	0.636279	0.0826644	FALSE	1693
DUOXA2	0.116	0.286	1.30189	0.505	0.514283	0.0825962	FALSE	1694
OR2A4	0.235	0.158	-0.572736	0.286	0.300257	0.0825562	FALSE	1695
FCRL4	0.059	0.114	0.950247	0.179	0.18936	0.082389	FALSE	1696
FCGR1A	0.386	0.292	-0.402632	0.513	0.522216	0.0823878	FALSE	1697
ZNF415	0.0113	0.0667	2.56136	0.0598	0.0581981	0.0823806	FALSE	1698
BPIFB4	0.0387	0.105	1.43998	0.156	0.164328	0.0823503	FALSE	1699
GRID2	0.0821	0.159	0.953573	0.289	0.30349	0.0823391	FALSE	1700
PLA2G3	0.0124	0.132	3.41213	0.226	0.237825	0.0823339	FALSE	1701
FOXN2	0.0144	0.0785	2.44662	0.0869	0.089597	0.082245	FALSE	1702
FBXW7	0.00961	0.102	3.40789	0.149	0.156861	0.0820573	FALSE	1703
ARHGAP29	0.0277	0.197	2.83024	0.369	0.383354	0.0820308	FALSE	1704
OR8A1	0.343	0.439	0.356012	0.646	0.650445	0.0820006	FALSE	1705
CYP2J2	0.0205	0.0799	1.96257	0.0922	0.0947302	0.0817786	FALSE	1706
BEX4	0.0041	0.0839	4.35497	0.102	0.10603	0.0817666	FALSE	1707
MAPK1	0.0443	0.191	2.10819	0.359	0.373488	0.0816953	FALSE	1708
ANGPTL5	0.00253	0.0456	4.17182	0.0219	0.0162661	0.0815654	FALSE	1709
SECISBP2L	0.0911	0.163	0.839349	0.301	0.316023	0.0815459	FALSE	1710
AHCYL1	0.408	0.25	-0.706641	0.46	0.471951	0.0815258	FALSE	1711
HLA-DQB2	0.0235	0.0955	2.02284	0.134	0.140129	0.0815067	FALSE	1712
PTPRF	0.0588	0.207	1.81574	0.391	0.40402	0.0814746	FALSE	1713
CATSPERG	0.0564	0.136	1.26984	0.241	0.252725	0.0812399	FALSE	1714
LKAAEAR1	0.0152	0.0884	2.53998	0.115	0.120563	0.0812208	FALSE	1715
THUMPD1	0.229	0.0668	-1.77743	0.062	0.060898	0.0811885	FALSE	1716
STH	0.053	0.117	1.14244	0.191	0.20236	0.0811834	FALSE	1717
TAF4	0.324	0.184	-0.816288	0.347	0.362288	0.0811341	FALSE	1718
SYTL5	0.00469	0.0823	4.13323	0.0997	0.103663	0.0810141	FALSE	1719
COMMD5	0.117	0.386	1.72209	0.611	0.616779	0.0810099	FALSE	1720
PRSS23	0.00113	0.0726	6.00557	0.0756	0.0766308	0.0809923	FALSE	1721
RCN1	0.011	0.0733	2.73631	0.0769	0.078564	0.0809801	FALSE	1722
GDPD3	0.00667	0.0568	3.09013	0.0405	0.0375987	0.0809302	FALSE	1723
RPS6KA3	0.0781	0.179	1.19657	0.339	0.353122	0.0809216	FALSE	1724
C11orf68	0.175	0.412	1.23529	0.631	0.636279	0.0808973	FALSE	1725
RPH3A	0.043	0.113	1.39391	0.182	0.192494	0.080861	FALSE	1726
SLC15A3	0.0313	0.0951	1.60328	0.135	0.141429	0.0807839	FALSE	1727
ZC3H12C	0.0248	0.116	2.22571	0.19	0.201193	0.0807808	FALSE	1728
ASF1A	0.178	0.285	0.679085	0.512	0.520683	0.0807767	FALSE	1729
C1orf162	0.0277	0.112	2.01554	0.18	0.190094	0.0807556	FALSE	1730
MFSD14B	0.0377	0.0994	1.39868	0.146	0.154295	0.0806779	FALSE	1731
SLPI	0.0148	0.073	2.3023	0.0769	0.078564	0.0806487	FALSE	1732
FBN3	0.233	0.114	-1.0313	0.186	0.196193	0.080634	FALSE	1733
XXYLT1	0.152	0.24	0.658963	0.45	0.461418	0.0806173	FALSE	1734
KNTC1	0.352	0.3	-0.230613	0.531	0.538615	0.0806164	FALSE	1735
CAND1	0.401	0.484	0.271405	0.678	0.681777	0.080517	FALSE	1736
DCP2	0.0205	0.377	4.20087	0.605	0.611546	0.0805161	FALSE	1737
HIST1H2AM	0.216	0.062	-1.80069	0.053	0.050465	0.0804146	FALSE	1738
SLC5A1	0.0553	0.117	1.08116	0.195	0.206026	0.080271	FALSE	1739
B3GNT4	0.236	0.297	0.331676	0.529	0.536749	0.080258	FALSE	1740
BCAN	0.293	0.0563	-2.37969	0.0405	0.0375987	0.0802177	FALSE	1741
RBM43	0.0176	0.0674	1.93717	0.0661	0.0659311	0.0795933	FALSE	1742
RMND5A	0.328	0.0686	-2.25742	0.0692	0.0691644	0.0795841	FALSE	1743
NXPE4	0.00234	0.072	4.94342	0.0769	0.078564	0.0795439	FALSE	1744
AMPH	0.00938	0.0899	3.26066	0.125	0.130429	0.0795279	FALSE	1745
UPK1A	0.0396	0.109	1.46076	0.177	0.186494	0.0794976	FALSE	1746
KRTAP19-3	0.281	0.201	-0.483375	0.389	0.40292	0.079351	FALSE	1747
MOV10	0.019	0.0804	2.0812	0.0995	0.103097	0.0793352	FALSE	1748
SZRD1	0.0997	0.254	1.34916	0.477	0.48815	0.0791074	FALSE	1749
CDKL2	0.17	0.234	0.460974	0.447	0.459218	0.0790876	FALSE	1750
OR10C1	0.299	0.214	-0.482535	0.414	0.427319	0.079019	FALSE	1751
NDUFS1	0.528	0.599	0.182018	0.735	0.738175	0.0789724	FALSE	1752
CHRNG	0.225	0.14	-0.684498	0.261	0.272858	0.078969	FALSE	1753
VCL	0.161	0.271	0.751232	0.502	0.511216	0.0789681	FALSE	1754
CLEC4A	0.00952	0.0842	3.14479	0.11	0.115429	0.0789529	FALSE	1755
FETUB	0.215	0.0849	-1.3405	0.112	0.117596	0.0789236	FALSE	1756
LAMC2	0.11	0.175	0.669851	0.34	0.354122	0.0788983	FALSE	1757
RCBTB2	0.0877	0.175	0.996706	0.34	0.354122	0.0788983	FALSE	1758
COIL	0.361	0.25	-0.530071	0.472	0.483717	0.0788521	FALSE	1759
COL17A1	0.199	0.289	0.538301	0.526	0.534149	0.0787056	FALSE	1760
PLEKHG4B	0.0141	0.189	3.74462	0.369	0.383354	0.0786996	FALSE	1761
ANKRD62	0.006	0.055	3.1964	0.0401	0.0371654	0.0786423	FALSE	1762
SEMA4C	0.0776	0.148	0.931469	0.28	0.29429	0.0786212	FALSE	1763
CIR1	0.238	0.128	-0.894818	0.232	0.243392	0.0785528	FALSE	1764
H2AFV	0.0167	0.252	3.9155	0.477	0.48815	0.0784845	FALSE	1765
TRIP12	0.273	0.153	-0.835369	0.293	0.307356	0.0783907	FALSE	1766
APCS	0.0618	0.123	0.99298	0.219	0.230792	0.0783238	FALSE	1767
LY6K	0.092	0.306	1.73383	0.547	0.555048	0.0782348	FALSE	1768
SLC20A2	0.107	0.285	1.41335	0.523	0.531649	0.0781969	FALSE	1769
KBTBD4	0.00743	0.0946	3.67041	0.142	0.149262	0.0781445	FALSE	1770
RAB10	0.457	0.554	0.277692	0.72	0.723043	0.0780232	FALSE	1771
PDSS1	0.0829	0.2	1.27056	0.394	0.40732	0.0780129	FALSE	1772
NSUN3	0.0382	0.103	1.431	0.166	0.174894	0.0779941	FALSE	1773
NDUFA10	0.344	0.214	-0.684798	0.419	0.432219	0.0779594	FALSE	1774
CAPNS1	0.0837	0.164	0.970396	0.32	0.334756	0.0779447	FALSE	1775
QPCTL	0.0363	0.172	2.24437	0.338	0.352388	0.0779123	FALSE	1776
GAN	0.0325	0.152	2.22556	0.293	0.307356	0.0778784	FALSE	1777
TMPRSS11B	0.00163	0.0414	4.66669	0.0187	0.0131662	0.0778543	FALSE	1778
OR52A1	0.00803	0.0615	2.93711	0.0566	0.0544315	0.0777452	FALSE	1779
C12orf65	0.231	0.113	-1.03157	0.194	0.205126	0.0777415	FALSE	1780
CASC3	0.331	0.221	-0.582785	0.433	0.445518	0.0776007	FALSE	1781
CNTNAP3	0.0684	0.154	1.17086	0.299	0.313856	0.0775035	FALSE	1782
FADS6	0.0555	0.145	1.38549	0.278	0.29209	0.0775	FALSE	1783
LGR5	0.0345	0.159	2.20436	0.31	0.325556	0.0774926	FALSE	1784
FOXN4	0.234	0.125	-0.90458	0.228	0.239959	0.0774829	FALSE	1785
OMG	0.0112	0.0605	2.43344	0.055	0.0526316	0.0773646	FALSE	1786
PHPT1	0.00536	0.068	3.66523	0.0723	0.0728642	0.077349	FALSE	1787
FGF4	0.00122	0.0595	5.60794	0.053	0.050465	0.0771721	FALSE	1788
ODF2	0.00341	0.0465	3.76939	0.0274	0.0218993	0.07717	FALSE	1789
KLHL25	0.0199	0.0898	2.17395	0.132	0.138529	0.0770897	FALSE	1790
BCDIN3D	0.259	0.157	-0.722188	0.308	0.323189	0.0770153	FALSE	1791
GPX4	0.7	0.508	-0.462526	0.702	0.705343	0.0770126	FALSE	1792
EP300	0.285	0.153	-0.89743	0.299	0.313856	0.0770002	FALSE	1793
SH3PXD2A	0.203	0.296	0.544117	0.542	0.549382	0.0769972	FALSE	1794
ENTPD2	0.0423	0.101	1.25563	0.164	0.172894	0.0769842	FALSE	1795
TMEM64	0.246	0.0621	-1.98599	0.0593	0.0576314	0.0769631	FALSE	1796
MKLN1	0.0607	0.158	1.38016	0.312	0.326556	0.0767947	FALSE	1797
DNAJB12	0.236	0.13	-0.860275	0.246	0.256658	0.0767839	FALSE	1798
UGGT2	0.0335	0.0946	1.49768	0.146	0.154295	0.076782	FALSE	1799
ZC4H2	0.000821	0.0727	6.46843	0.0855	0.0880637	0.0767133	FALSE	1800
ADGRL2	0.0178	0.0831	2.22297	0.114	0.119429	0.0766921	FALSE	1801
CD164	0.122	0.342	1.48712	0.589	0.596713	0.0766881	FALSE	1802
ZBTB6	0.0128	0.0636	2.31288	0.0632	0.0624313	0.0766124	FALSE	1803
CCDC184	0.139	0.273	0.973816	0.515	0.524783	0.0764456	FALSE	1804
PIGY	0.0657	0.275	2.06547	0.518	0.527649	0.0763551	FALSE	1805
C19orf44	0.0575	0.371	2.68979	0.617	0.623013	0.0762417	FALSE	1806
RFPL1	0.022	0.0826	1.90864	0.114	0.119429	0.0762306	FALSE	1807
PI4K2A	0.0674	0.124	0.87952	0.231	0.243192	0.0761423	FALSE	1808
LYZL4	0.222	0.0754	-1.55792	0.0946	0.0978301	0.0761184	FALSE	1809
RSPH6A	0.0422	0.212	2.32875	0.424	0.437719	0.0760666	FALSE	1810
ZGRF1	0.258	0.16	-0.689299	0.32	0.334756	0.0760436	FALSE	1811
MSGN1	0.00671	0.0533	2.98975	0.0405	0.0375987	0.0759433	FALSE	1812
LRRC10	0.00698	0.0677	3.27786	0.0749	0.0756975	0.0758862	FALSE	1813
SLC5A5	0.0537	0.271	2.3353	0.515	0.524783	0.0758856	FALSE	1814
CHIC2	0.012	0.285	4.56986	0.534	0.541915	0.0758296	FALSE	1815
NTAN1	0.0546	0.115	1.07466	0.208	0.219226	0.0757974	FALSE	1816
LAMB2	0.0233	0.0818	1.81177	0.113	0.118529	0.075761	FALSE	1817
BRAT1	0.575	0.657	0.192331	0.766	0.767274	0.0755874	FALSE	1818
HOXA11	0.0528	0.124	1.23173	0.234	0.245992	0.0755258	FALSE	1819
RND1	0.207	0.298	0.525682	0.55	0.557948	0.0755151	FALSE	1820
ZNF229	0.0172	0.0863	2.32695	0.128	0.133562	0.0754535	FALSE	1821
DMPK	0.0099	0.0589	2.57277	0.055	0.0526316	0.0753186	FALSE	1822
VAC14	0.267	0.381	0.512951	0.628	0.634379	0.0753051	FALSE	1823
SCPEP1	0.231	0.0509	-2.18216	0.0367	0.0331989	0.0752748	FALSE	1824
PTPRT	0.0207	0.0743	1.84373	0.0938	0.0971301	0.0752396	FALSE	1825
CNDP1	0.00984	0.0915	3.21704	0.143	0.150595	0.0752303	FALSE	1826
CCDC102A	0.0223	0.103	2.20753	0.177	0.186494	0.0751216	FALSE	1827
HAND1	0.0188	0.0764	2.02284	0.1	0.10403	0.0750891	FALSE	1828
MS4A3	0.0122	0.0714	2.54904	0.0861	0.0888304	0.0750727	FALSE	1829
BIRC8	0.0726	0.238	1.71292	0.472	0.483717	0.0750672	FALSE	1830
SLX1A	0.247	0.119	-1.05355	0.222	0.234126	0.0750356	FALSE	1831
TBPL2	0.0471	0.106	1.17027	0.186	0.196193	0.0749754	FALSE	1832
GNRHR	0.0156	0.0623	1.99769	0.0638	0.0629979	0.074802	FALSE	1833
RABIF	0.56	0.594	0.0850361	0.747	0.748408	0.0747616	FALSE	1834
PTPRG	0.0889	0.177	0.993494	0.365	0.378821	0.0746172	FALSE	1835
ZNF615	0.0157	0.0918	2.54773	0.146	0.154295	0.0745093	FALSE	1836
DCDC2B	0.142	0.208	0.550693	0.426	0.438585	0.0744527	FALSE	1837
GPR137C	0.215	0.0735	-1.54852	0.0938	0.0971301	0.0744295	FALSE	1838
AQP10	0.0689	0.226	1.71375	0.457	0.468584	0.074402	FALSE	1839
FRZB	0.0258	0.0819	1.66649	0.118	0.123529	0.0743841	FALSE	1840
TMSB15B	0.00488	0.0777	3.99296	0.106	0.11043	0.0743522	FALSE	1841
JADE3	0.0294	0.11	1.90362	0.2	0.211226	0.0742777	FALSE	1842
APEH	0.0656	0.125	0.93016	0.244	0.254725	0.0742411	FALSE	1843
PIGM	0.0939	0.221	1.23485	0.45	0.461418	0.0742351	FALSE	1844
ZNF227	0.0455	0.1	1.13606	0.171	0.181027	0.0742256	FALSE	1845
SAG	0.00759	0.0947	3.64119	0.157	0.164861	0.0741389	FALSE	1846
GPR87	0.107	0.178	0.734266	0.369	0.383354	0.0741192	FALSE	1847
CAPN11	0.0291	0.0945	1.6993	0.156	0.164328	0.0741153	FALSE	1848
ENY2	0.0374	0.247	2.7234	0.491	0.501217	0.0740937	FALSE	1849
ABCC6	0.051	0.161	1.65849	0.332	0.346688	0.0740698	FALSE	1850
MUTYH	0.0218	0.0824	1.91832	0.121	0.126396	0.0740172	FALSE	1851
PLCD1	0.0655	0.194	1.56649	0.403	0.415486	0.074	FALSE	1852
CDK5RAP2	0.209	0.0675	-1.63054	0.0783	0.0802973	0.0739327	FALSE	1853
SLC25A11	0.0231	0.157	2.7648	0.324	0.338722	0.0738146	FALSE	1854
HMGN5	0.00155	0.0706	5.50933	0.0878	0.090297	0.0737295	FALSE	1855
TLDC1	0.14	0.279	0.994838	0.537	0.544415	0.0736755	FALSE	1856
ECM1	0.0653	0.124	0.925185	0.244	0.254725	0.0736472	FALSE	1857
NXT1	0.207	0.221	0.0944156	0.452	0.464285	0.0736407	FALSE	1858
CHRNA10	0.0348	0.23	2.72447	0.467	0.478684	0.0735887	FALSE	1859
KRT6A	0.293	0.202	-0.536545	0.419	0.432219	0.0735878	FALSE	1860
MS4A2	0.0169	0.111	2.71546	0.207	0.217826	0.0734698	FALSE	1861
PLOD3	0.00744	0.132	4.14909	0.266	0.278024	0.0733811	FALSE	1862
RNF138	0.0567	0.135	1.25154	0.273	0.28619	0.0733516	FALSE	1863
SLC38A5	0.00577	0.0825	3.83775	0.124	0.129296	0.0732943	FALSE	1864
GPR17	0.0235	0.0762	1.69713	0.105	0.109396	0.073228	FALSE	1865
BICDL1	0.015	0.0645	2.10434	0.073	0.0733976	0.0731635	FALSE	1866
ZNF33B	0.286	0.197	-0.53782	0.412	0.425419	0.073123	FALSE	1867
CHRNA9	0.0574	0.116	1.015	0.223	0.234692	0.0730222	FALSE	1868
ZNF283	0.141	0.359	1.34829	0.62	0.626046	0.0730184	FALSE	1869
TNS2	0.208	0.101	-1.04223	0.179	0.18936	0.0729938	FALSE	1870
ZNF638	0.182	0.487	1.41998	0.705	0.70831	0.0729413	FALSE	1871
ABHD14B	0.0102	0.0602	2.56119	0.0626	0.0616646	0.0728398	FALSE	1872
TIMMDC1	0.159	0.491	1.6267	0.708	0.711043	0.0727191	FALSE	1873
PPP2R5C	0.0415	0.406	3.2903	0.657	0.662145	0.0726931	FALSE	1874
TFEC	0.00035	0.0381	6.76629	0.0179	0.0123996	0.0726412	FALSE	1875
CASTOR3	0.156	0.218	0.482782	0.452	0.464285	0.072641	FALSE	1876
OTOS	0.123	0.218	0.82567	0.452	0.464285	0.072641	FALSE	1877
ZNF668	0.0308	0.124	2.00934	0.249	0.259958	0.072552	FALSE	1878
COP1	0.244	0.378	0.631505	0.637	0.642812	0.0725443	FALSE	1879
GOLGA6D	0.271	0.19	-0.512293	0.403	0.415486	0.0724743	FALSE	1880
C8orf82	0.0475	0.111	1.22456	0.211	0.222893	0.0723614	FALSE	1881
CELSR3	0.0301	0.0847	1.4926	0.134	0.140129	0.0722892	FALSE	1882
SURF1	0.102	0.181	0.827421	0.385	0.398887	0.0722462	FALSE	1883
HES7	0.19	0.258	0.441372	0.515	0.524783	0.0722453	FALSE	1884
PGLYRP3	0.019	0.0689	1.8585	0.0869	0.089597	0.072187	FALSE	1885
NHLH2	0.00937	0.0582	2.6349	0.0593	0.0576314	0.0721296	FALSE	1886
NPBWR2	0.018	0.068	1.91754	0.0847	0.0870971	0.0720797	FALSE	1887
SHROOM2	0.00332	0.0781	4.55607	0.114	0.119429	0.0720776	FALSE	1888
ECPAS	0.0289	0.119	2.04182	0.236	0.247958	0.0720689	FALSE	1889
TBL1XR1	0.311	0.165	-0.914449	0.352	0.366188	0.0719889	FALSE	1890
SGCE	0.319	0.247	-0.369045	0.502	0.511216	0.0719746	FALSE	1891
LLPH	0.346	0.259	-0.41782	0.518	0.527649	0.0719126	FALSE	1892
SETD3	0.0309	0.104	1.7509	0.192	0.20356	0.071896	FALSE	1893
TMUB2	0.0537	0.157	1.54777	0.334	0.348522	0.0718699	FALSE	1894
ACTR5	0.408	0.297	-0.458106	0.566	0.573514	0.0717124	FALSE	1895
FABP5	0.269	0.0552	-2.28487	0.053	0.050465	0.0715949	FALSE	1896
PRKAR1B	0.00768	0.0773	3.33129	0.113	0.118529	0.0715932	FALSE	1897
PLEKHG4	0.022	0.106	2.26849	0.2	0.211226	0.0715767	FALSE	1898
HORMAD1	0.0232	0.143	2.62382	0.301	0.316023	0.0715403	FALSE	1899
USHBP1	0.122	0.21	0.783508	0.445	0.456885	0.0714406	FALSE	1900
BCL3	0.00552	0.0661	3.58191	0.0811	0.0830306	0.0714384	FALSE	1901
SLC11A1	0.0912	0.22	1.2704	0.462	0.473818	0.0713656	FALSE	1902
HIST1H3J	0.0831	0.312	1.90863	0.583	0.590814	0.0713074	FALSE	1903
XKR7	0.106	0.191	0.849508	0.41	0.423486	0.0712738	FALSE	1904
VSTM5	0.0817	0.129	0.658963	0.268	0.280257	0.0712652	FALSE	1905
TTL	0.0316	0.102	1.69057	0.189	0.20026	0.0712374	FALSE	1906
ARHGEF11	0.105	0.331	1.65644	0.603	0.609413	0.0711942	FALSE	1907
ZC3H3	0.265	0.185	-0.518467	0.4	0.41252	0.0711428	FALSE	1908
CD160	0.00839	0.198	4.56069	0.424	0.437719	0.0710434	FALSE	1909
TMEM121B	0.0463	0.161	1.79798	0.348	0.362488	0.0709537	FALSE	1910
CSTL1	0.0071	0.0514	2.85588	0.0451	0.0419986	0.0707657	FALSE	1911
GNLY	0.0209	0.0809	1.95264	0.128	0.133562	0.0707322	FALSE	1912
RAB11FIP3	0.0482	0.188	1.96363	0.407	0.420553	0.0707218	FALSE	1913
STRN3	0.159	0.218	0.455301	0.462	0.473818	0.0707168	FALSE	1914
KRTDAP	0.273	0.334	0.290947	0.608	0.614246	0.0706936	FALSE	1915
SH3BP5L	0.0263	0.0891	1.76036	0.153	0.161095	0.0706491	FALSE	1916
CHRNA6	0.0154	0.19	3.625	0.412	0.425419	0.0705248	FALSE	1917
MGAT4A	0.055	0.15	1.44746	0.324	0.338722	0.0705235	FALSE	1918
EXD3	0.0042	0.0529	3.65481	0.0496	0.0465984	0.0704432	FALSE	1919
HOXC13	0.0309	0.0914	1.56459	0.162	0.170294	0.0702683	FALSE	1920
ZNF285	0.0233	0.0803	1.78507	0.128	0.133562	0.0702076	FALSE	1921
LEFTY1	0.0402	0.209	2.37824	0.45	0.461418	0.0702043	FALSE	1922
HDAC8	0.372	0.225	-0.725378	0.477	0.48815	0.0700754	FALSE	1923
SHROOM3	0.0142	0.0634	2.15859	0.0769	0.078564	0.0700428	FALSE	1924
PLEKHG2	0.0264	0.098	1.89224	0.183	0.192994	0.0700168	FALSE	1925
NIPSNAP3B	0.09	0.158	0.811928	0.346	0.360688	0.0699732	FALSE	1926
TAZ	0.389	0.499	0.35927	0.721	0.724109	0.0699578	FALSE	1927
C17orf75	0.116	0.168	0.534336	0.369	0.383354	0.0699552	FALSE	1928
GATA1	0.00722	0.0793	3.45725	0.126	0.131262	0.0699315	FALSE	1929
STAM2	0.0498	0.128	1.36193	0.271	0.284357	0.0699054	FALSE	1930
CRP	0.0469	0.122	1.37922	0.256	0.267424	0.0698815	FALSE	1931
AP1S3	0.0954	0.177	0.891688	0.389	0.40292	0.0698763	FALSE	1932
STRC	0.0155	0.0723	2.22173	0.104	0.10833	0.0697877	FALSE	1933
SLC16A3	0.212	0.108	-0.973033	0.214	0.226026	0.0697509	FALSE	1934
PDXK	0.039	0.0998	1.35557	0.189	0.20026	0.0697009	FALSE	1935
HLA-DQA1	0.00401	0.158	5.30018	0.348	0.362488	0.0696316	FALSE	1936
HMGA2	0.0441	0.12	1.44418	0.252	0.262891	0.0696269	FALSE	1937
GAL3ST3	0.00888	0.104	3.54988	0.204	0.214893	0.0694489	FALSE	1938
UFSP1	0.0326	0.109	1.74138	0.219	0.230792	0.0694089	FALSE	1939
SYNPO2L	0.227	0.139	-0.707607	0.302	0.316789	0.0693929	FALSE	1940
OR4C15	0.00727	0.0664	3.19116	0.0876	0.0902303	0.0693646	FALSE	1941
ZDHHC12	0.00472	0.0545	3.5294	0.0555	0.0533649	0.0693646	FALSE	1942
GPM6B	0.011	0.0748	2.76553	0.113	0.118529	0.0692778	FALSE	1943
P2RX1	0.0305	0.111	1.86368	0.226	0.237825	0.0692353	FALSE	1944
SLC22A17	0.199	0.0876	-1.18377	0.154	0.162195	0.0692008	FALSE	1945
UBP1	0.0189	0.0962	2.34765	0.181	0.191094	0.0691441	FALSE	1946
QRICH1	0.333	0.0502	-2.72976	0.0451	0.0419986	0.0691136	FALSE	1947
SIPA1	0.0789	0.342	2.1159	0.622	0.628346	0.0690161	FALSE	1948
PCYT1B	0.00806	0.0724	3.16714	0.107	0.111496	0.0689783	FALSE	1949
RTKN	0.166	0.226	0.44514	0.485	0.49525	0.0689696	FALSE	1950
NEK6	0.203	0.0838	-1.27646	0.143	0.150595	0.0688995	FALSE	1951
UQCC1	0.266	0.157	-0.760662	0.35	0.364388	0.0688345	FALSE	1952
ZBTB10	0.00112	0.0713	5.99233	0.104	0.10833	0.0688225	FALSE	1953
OR6K2	0.0211	0.108	2.35572	0.219	0.230792	0.0687721	FALSE	1954
TRIP6	0.228	0.464	1.02509	0.708	0.711043	0.0687203	FALSE	1955
TMEM89	0.0268	0.114	2.08873	0.238	0.249858	0.0686629	FALSE	1956
SP6	0.0118	0.222	4.2337	0.48	0.49065	0.0686486	FALSE	1957
GNB4	0.0301	0.125	2.05409	0.27	0.282757	0.0685733	FALSE	1958
CLDN9	0.028	0.133	2.24793	0.291	0.30539	0.0685143	FALSE	1959
MYT1	0.0241	0.0776	1.68702	0.126	0.131262	0.0684323	FALSE	1960
SLC38A8	0.00278	0.0608	4.45091	0.0743	0.0749308	0.0684206	FALSE	1961
POU5F2	0.0783	0.137	0.807092	0.302	0.316789	0.0683944	FALSE	1962
SMARCA4	0.332	0.471	0.504544	0.713	0.716209	0.0682761	FALSE	1963
TMEM126B	0.00723	0.0784	3.43879	0.129	0.134696	0.0682587	FALSE	1964
MYO1F	0.0536	0.291	2.44071	0.575	0.582814	0.0682308	FALSE	1965
SEC24A	0.125	0.282	1.17377	0.566	0.573514	0.0680905	FALSE	1966
REC114	0.0182	0.0719	1.98205	0.108	0.113096	0.0680571	FALSE	1967
ZNF45	0.00996	0.0554	2.47567	0.0604	0.059098	0.0680549	FALSE	1968
ZFYVE1	0.0271	0.0778	1.52148	0.128	0.133562	0.0680218	FALSE	1969
SLC26A8	0.21	0.0522	-2.00827	0.0525	0.0498317	0.0679902	FALSE	1970
CPT1A	0.115	0.304	1.40244	0.591	0.597913	0.067902	FALSE	1971
GPR84	0.0405	0.102	1.33258	0.205	0.216126	0.0678599	FALSE	1972
PSMF1	0.216	0.131	-0.721465	0.289	0.30349	0.0678391	FALSE	1973
TBC1D15	0.00209	0.0369	4.14205	0.0199	0.0145328	0.0678093	FALSE	1974
ASH2L	0.283	0.363	0.359167	0.646	0.650445	0.0678046	FALSE	1975
BIRC6	0.296	0.0929	-1.67185	0.177	0.186494	0.0677553	FALSE	1976
C17orf50	0.185	0.265	0.518467	0.547	0.555048	0.0677524	FALSE	1977
GLS2	0.0935	0.213	1.18782	0.47	0.480851	0.0677318	FALSE	1978
BCO1	0.0616	0.113	0.875321	0.24	0.251725	0.0676953	FALSE	1979
B4GALT3	0.236	0.342	0.535209	0.628	0.634379	0.0675967	FALSE	1980
KRTAP10-1	0.23	0.136	-0.758027	0.304	0.319056	0.0674741	FALSE	1981
CD101	0.206	0.116	-0.82852	0.251	0.262025	0.0674723	FALSE	1982
MTA2	0.0839	0.302	1.84781	0.591	0.597913	0.0674552	FALSE	1983
ATP2C2	0.0229	0.0877	1.93723	0.162	0.170294	0.0674237	FALSE	1984
THBS4	0.00753	0.0465	2.62651	0.0386	0.0355321	0.0673961	FALSE	1985
TERT	0.0274	0.109	1.99208	0.229	0.241292	0.0673028	FALSE	1986
RNF223	0.0717	0.188	1.39069	0.426	0.438585	0.0672938	FALSE	1987
RARRES1	0.00527	0.0455	3.10999	0.0367	0.0331989	0.0672889	FALSE	1988
MICAL3	0.00832	0.0487	2.54927	0.0447	0.0415986	0.0672509	FALSE	1989
SOX8	0.0111	0.11	3.30887	0.233	0.244759	0.0672388	FALSE	1990
CYP27B1	0.215	0.111	-0.953777	0.236	0.247958	0.067224	FALSE	1991
FAM117B	0.0597	0.211	1.82144	0.469	0.480484	0.0671657	FALSE	1992
MATK	0.215	0.0671	-1.67995	0.0962	0.0997967	0.0671593	FALSE	1993
MAST3	0.252	0.342	0.440573	0.631	0.636279	0.0671526	FALSE	1994
UNG	0.0144	0.0849	2.5597	0.154	0.162195	0.0670679	FALSE	1995
ZNF688	0.2	0.275	0.459432	0.564	0.570648	0.0669988	FALSE	1996
ZC3H4	0.143	0.293	1.03489	0.583	0.590814	0.066965	FALSE	1997
TMEM181	0.00316	0.0432	3.77303	0.0326	0.0282324	0.0669277	FALSE	1998
[truncated: 14,045 more rows]

## Sheet: S3b (candidate interactors)
Supplemental Table S3: In silico genome-wide screening result comparing CICHomDel mutant cell lines to CICWT control cell lines. b Candidate CIC genetic interactors, defined as genes with significant differential lethality probabilities (Adjusted Mann-Whitney U test p-value < 0.05 and median lethality probability > 0.5 in at least one group; Methods).
Hugo symbol	CICWT median lethality probability	CICHomDel median lethality probability	Log2FC (CICHomDel / CICWT median lethality probabilities)	P-value	Adj. p-value
FERMT2	0.98	0.632	0.632857	0.0503	0.0473984
ZNF217	0.962	0.544	0.82243	0.0395	0.0365988
ILK	0.929	0.504	0.882255	0.0378	0.0344989
TAF3	0.841	0.354	1.24836	0.0303	0.0253658
FAM219A	0.64	0.34	0.912537	0.0506	0.0476317
RIF1	0.828	0.33	1.32716	0.0246	0.019166
H3F3B	0.733	0.324	1.17782	0.0294	0.0241325
KMT5A	0.681	0.324	1.07166	0.0463	0.0431986
HNRNPA0	0.786	0.322	1.28747	0.0219	0.0162661
IPO5	0.878	0.311	1.49731	0.0234	0.0177661
UBE2S	0.908	0.301	1.59293	0.0252	0.019666
ARID2	0.935	0.296	1.65937	0.0194	0.0138329
ATP23	0.661	0.291	1.18363	0.0442	0.0410653
IPPK	0.944	0.29	1.70273	0.0294	0.0241325
LUC7L2	0.838	0.278	1.59187	0.0326	0.0282324
PIGS	0.689	0.276	1.31984	0.0413	0.0386654
NKX2-5	0.669	0.267	1.32517	0.0313	0.0268658
GPR179	0.677	0.266	1.34773	0.0426	0.039732
SCRT1	0.588	0.263	1.16075	0.0417	0.0390654
ZBTB39	0.631	0.258	1.29027	0.0386	0.0355321
ANKRD17	0.885	0.253	1.80654	0.0229	0.0173328
MBTD1	0.664	0.237	1.4863	0.051	0.0482651
GNG13	0.527	0.231	1.18991	0.0405	0.0375987
TPM2	0.659	0.224	1.55678	0.0229	0.0173328
CKAP2	0.682	0.22	1.63227	0.0322	0.0278657
NR0B2	0.551	0.217	1.34436	0.0346	0.0303657
CARM1	0.746	0.214	1.80156	0.05	0.0469318
CIZ1	0.66	0.214	1.62486	0.0201	0.0146995
TNS3	0.697	0.21	1.73077	0.0438	0.040632
RPE65	0.518	0.21	1.30256	0.0419	0.039132
ZBTB12	0.698	0.208	1.74664	0.0181	0.0125996
GATA3	0.693	0.205	1.75723	0.0394	0.0363988
GZMH	0.614	0.205	1.58261	0.0346	0.0303657
TM2D2	0.708	0.199	1.83098	0.0491	0.0459318
GNAQ	0.677	0.199	1.76639	0.0222	0.0165328
USP18	0.728	0.193	1.91534	0.0276	0.0221326
RBM23	0.531	0.19	1.48271	0.051	0.0482651
SP1	0.82	0.187	2.13259	0.0294	0.0241325
RREB1	0.776	0.179	2.1161	0.0291	0.0237992
CDH15	0.719	0.176	2.03042	0.0173	0.0117996
NT5C3B	0.568	0.175	1.69854	0.0282	0.0226992
HAO2	0.551	0.165	1.73959	0.0282	0.0226992
GPR45	0.538	0.16	1.74953	0.0401	0.0371654
FIBP	0.582	0.154	1.91809	0.0401	0.0371654
LEMD2	0.65	0.149	2.12513	0.0451	0.0419986
ELMOD3	0.552	0.147	1.90885	0.0244	0.0187994
PTRH1	0.593	0.137	2.11386	0.0244	0.0187994
CALCOCO1	0.578	0.137	2.07689	0.0202	0.0146995
BECN1	0.506	0.131	1.94957	0.0447	0.0415986
NFE2	0.577	0.129	2.1612	0.0192	0.0135995
HAUS2	0.644	0.121	2.41205	0.0189	0.0133662
CEBPB	0.706	0.112	2.65617	0.0234	0.0177661
OR4F29	0.549	0.111	2.30625	0.0349	0.030699
AJM1	0.509	0.106	2.2636	0.0197	0.0142662
CDK10	0.638	0.105	2.60317	0.0173	0.0117996
ZNF771	0.524	0.105	2.31918	0.0187	0.0131662
GRIN2A	0.59	0.1	2.56071	0.0153	0.0103663
PKN3	0.509	0.0992	2.35925	0.0236	0.0179327
ZNF862	0.503	0.0971	2.37302	0.036	0.0319989
DGCR6	0.565	0.0852	2.72933	0.0234	0.0177661
DBNDD1	0.596	0.0825	2.85285	0.0257	0.0200327
UGCG	0.644	0.0735	3.13124	0.0353	0.0311323
RB1CC1	0.645	0.0561	3.52323	0.0288	0.0234659
CSNK2A1	0.673	0.0494	3.76802	0.027	0.0215659
COL4A3BP	0.518	0.0494	3.39037	0.0303	0.0253658
KIDINS220	0.64	0.0192	5.05889	0.0241	0.0185994
PRKCI	0.547	0.0133	5.36204	0.03	0.0249992
TGIF1	0.736	0.0119	5.95067	0.0197	0.0142662
PAX8	0.502	0.0118	5.41083	0.0455	0.0424986
CTNNA1	0.61	0.00942	6.01694	0.026	0.0205993

## Sheet: S3c (enrichment)
Supplemental Table S3: In silico genome-wide screening result comparing CICHomDel mutant cell lines to CICWT control cell lines. c GO term annotations for candidate CIC genetic interactors shown in b (ClusterProfiler output) and cluster assignment that groups similar terms together (see Supplemental Methods).
ID	Description	GeneRatio	BgRatio	pvalue	p.adjust	qvalue	geneID	Count	Cluster_ID
GO:1905332	positive regulation of morphogenesis of an epithelium	3/64	34/14113	0.000481417	0.0970391	0.0879049	RREB1/GATA3/PAX8	3	1
GO:0072182	regulation of nephron tubule epithelial cell differentiation	2/64	12/14113	0.00129758	0.143945	0.130396	GATA3/PAX8	2	1
GO:0032352	positive regulation of hormone metabolic process	2/64	13/14113	0.00152903	0.158234	0.143339	GATA3/PAX8	2	1
GO:0072160	nephron tubule epithelial cell differentiation	2/64	14/14113	0.00177866	0.158234	0.143339	GATA3/PAX8	2	1
GO:0071599	otic vesicle development	2/64	15/14113	0.00204631	0.158234	0.143339	GATA3/PAX8	2	1
GO:0090185	negative regulation of kidney development	2/64	16/14113	0.00233182	0.158234	0.143339	GATA3/PAX8	2	1
GO:0060675	ureteric bud morphogenesis	3/64	63/14113	0.00290966	0.158234	0.143339	ILK/GATA3/PAX8	3	1
GO:0072079	nephron tubule formation	2/64	18/14113	0.00295576	0.158234	0.143339	GATA3/PAX8	2	1
GO:2000696	regulation of epithelial cell differentiation involved in kidney development	2/64	18/14113	0.00295576	0.158234	0.143339	GATA3/PAX8	2	1
GO:0072171	mesonephric tubule morphogenesis	3/64	64/14113	0.00304296	0.158234	0.143339	ILK/GATA3/PAX8	3	1
GO:0060231	mesenchymal to epithelial transition	2/64	19/14113	0.00329386	0.159381	0.144378	GATA3/PAX8	2	1
GO:0003281	ventricular septum development	3/64	68/14113	0.0036135	0.159796	0.144754	GATA3/NKX2-5/PAX8	3	1
GO:0061213	positive regulation of mesonephros development	2/64	21/14113	0.00402157	0.169791	0.153809	GATA3/PAX8	2	1
GO:0072078	nephron tubule morphogenesis	3/64	71/14113	0.00408152	0.169791	0.153809	ILK/GATA3/PAX8	3	1
GO:0006590	thyroid hormone generation	2/64	22/14113	0.00441084	0.170537	0.154485	GATA3/PAX8	2	1
GO:0072088	nephron epithelium morphogenesis	3/64	73/14113	0.00441308	0.170537	0.154485	ILK/GATA3/PAX8	3	1
GO:0061333	renal tubule morphogenesis	3/64	75/14113	0.00476054	0.170537	0.154485	ILK/GATA3/PAX8	3	1
GO:0072028	nephron morphogenesis	3/64	75/14113	0.00476054	0.170537	0.154485	ILK/GATA3/PAX8	3	1
GO:0042403	thyroid hormone metabolic process	2/64	25/14113	0.00567851	0.181712	0.164608	GATA3/PAX8	2	1
GO:0061217	regulation of mesonephros development	2/64	25/14113	0.00567851	0.181712	0.164608	GATA3/PAX8	2	1
GO:0072080	nephron tubule development	3/64	90/14113	0.00789371	0.224603	0.203461	ILK/GATA3/PAX8	3	1
GO:0060993	kidney morphogenesis	3/64	92/14113	0.00838414	0.224603	0.203461	ILK/GATA3/PAX8	3	1
GO:0061326	renal tubule development	3/64	92/14113	0.00838414	0.224603	0.203461	ILK/GATA3/PAX8	3	1
GO:0032350	regulation of hormone metabolic process	2/64	31/14113	0.00864936	0.224603	0.203461	GATA3/PAX8	2	1
GO:0001657	ureteric bud development	3/64	94/14113	0.00889217	0.224603	0.203461	ILK/GATA3/PAX8	3	1
GO:0072163	mesonephric epithelium development	3/64	95/14113	0.00915282	0.224603	0.203461	ILK/GATA3/PAX8	3	1
GO:0072164	mesonephric tubule development	3/64	95/14113	0.00915282	0.224603	0.203461	ILK/GATA3/PAX8	3	1
GO:0110111	negative regulation of animal organ morphogenesis	2/64	33/14113	0.0097643	0.224603	0.203461	GATA3/PAX8	2	1
GO:0001823	mesonephros development	3/64	99/14113	0.01024	0.227192	0.205807	ILK/GATA3/PAX8	3	1
GO:0018958	phenol-containing compound metabolic process	3/64	104/14113	0.0117005	0.237435	0.215085	GATA3/GRIN2A/PAX8	3	1
GO:0003279	cardiac septum development	3/64	105/14113	0.0120063	0.238312	0.21588	GATA3/NKX2-5/PAX8	3	1
GO:0090184	positive regulation of kidney development	2/64	37/14113	0.0121741	0.238312	0.21588	GATA3/PAX8	2	1
GO:0072009	nephron epithelium development	3/64	106/14113	0.0123166	0.238312	0.21588	ILK/GATA3/PAX8	3	1
GO:0003231	cardiac ventricle development	3/64	121/14113	0.0175275	0.272578	0.24692	GATA3/NKX2-5/PAX8	3	1
GO:0035270	endocrine system development	3/64	122/14113	0.0179123	0.275982	0.250004	GATA3/NKX2-5/PAX8	3	1
GO:0035850	epithelial cell differentiation involved in kidney development	2/64	46/14113	0.0184324	0.27854	0.252321	GATA3/PAX8	2	1
GO:1905330	regulation of morphogenesis of an epithelium	3/64	132/14113	0.0220197	0.287443	0.260386	RREB1/GATA3/PAX8	3	1
GO:0072006	nephron development	3/64	133/14113	0.0224565	0.287443	0.260386	ILK/GATA3/PAX8	3	1
GO:0090183	regulation of kidney development	2/64	52/14113	0.0232089	0.287903	0.260803	GATA3/PAX8	2	1
GO:0072073	kidney epithelium development	3/64	136/14113	0.0237951	0.287903	0.260803	ILK/GATA3/PAX8	3	1
GO:0030856	regulation of epithelial cell differentiation	3/64	141/14113	0.0261208	0.299759	0.271543	CEBPB/GATA3/PAX8	3	1
GO:0061005	cell differentiation involved in kidney development	2/64	56/14113	0.0266453	0.303684	0.275098	GATA3/PAX8	2	1
GO:0003205	cardiac chamber development	3/64	162/14113	0.037174	0.325353	0.294727	GATA3/NKX2-5/PAX8	3	1
GO:1900087	positive regulation of G1/S transition of mitotic cell cycle	2/64	24/14113	0.00523947	0.181635	0.164538	ANKRD17/CDK10	2	2
GO:1902808	positive regulation of cell cycle G1/S phase transition	2/64	32/14113	0.00919921	0.224603	0.203461	ANKRD17/CDK10	2	2
GO:0045931	positive regulation of mitotic cell cycle	3/64	104/14113	0.0117005	0.237435	0.215085	ANKRD17/CDK10/BECN1	3	2
GO:0090068	positive regulation of cell cycle process	4/64	204/14113	0.0137134	0.252084	0.228355	ANKRD17/CARM1/CDK10/BECN1	4	2
GO:2000045	regulation of G1/S transition of mitotic cell cycle	3/64	115/14113	0.0153173	0.262069	0.237401	ANKRD17/CARM1/CDK10	3	2
GO:0044772	mitotic cell cycle phase transition	5/64	331/14113	0.0169882	0.266683	0.24158	UBE2S/ANKRD17/CARM1/HAUS2/CDK10	5	2
GO:1901992	positive regulation of mitotic cell cycle phase transition	2/64	49/14113	0.0207626	0.283189	0.256532	ANKRD17/CDK10	2	2
GO:1902806	regulation of cell cycle G1/S phase transition	3/64	130/14113	0.0211604	0.286268	0.259322	ANKRD17/CARM1/CDK10	3	2
GO:0010564	regulation of cell cycle process	6/64	490/14113	0.0233149	0.287903	0.260803	ANKRD17/CARM1/CSNK2A1/HAUS2/CDK10/BECN1	6	2
GO:1901990	regulation of mitotic cell cycle phase transition	4/64	240/14113	0.0234033	0.287903	0.260803	ANKRD17/CARM1/HAUS2/CDK10	4	2
GO:0044770	cell cycle phase transition	5/64	364/14113	0.0244714	0.29086	0.263482	UBE2S/ANKRD17/CARM1/HAUS2/CDK10	5	2
GO:1901989	positive regulation of cell cycle phase transition	2/64	62/14113	0.0321579	0.325353	0.294727	ANKRD17/CDK10	2	2
GO:1901987	regulation of cell cycle phase transition	4/64	269/14113	0.0336354	0.325353	0.294727	ANKRD17/CARM1/HAUS2/CDK10	4	2
GO:0007346	regulation of mitotic cell cycle	5/64	402/14113	0.0354073	0.325353	0.294727	ANKRD17/CARM1/HAUS2/CDK10/BECN1	5	2
GO:0045787	positive regulation of cell cycle	4/64	279/14113	0.0376848	0.325353	0.294727	ANKRD17/CARM1/CDK10/BECN1	4	2
GO:0000082	G1/S transition of mitotic cell cycle	3/64	166/14113	0.0395124	0.325353	0.294727	ANKRD17/CARM1/CDK10	3	2
GO:0044843	cell cycle G1/S phase transition	3/64	182/14113	0.0495954	0.325353	0.294727	ANKRD17/CARM1/CDK10	3	2
GO:0006337	nucleosome disassembly	2/64	10/14113	0.000889907	0.134619	0.121947	ARID2/NFE2	2	3
GO:0032986	protein-DNA complex disassembly	2/64	10/14113	0.000889907	0.134619	0.121947	ARID2/NFE2	2	3
GO:0031498	chromatin disassembly	2/64	12/14113	0.00129758	0.143945	0.130396	ARID2/NFE2	2	3
GO:2000781	positive regulation of double-strand break repair	2/64	28/14113	0.00709271	0.210755	0.190917	ARID2/RIF1	2	3
GO:0010569	regulation of double-strand break repair via homologous recombination	2/64	32/14113	0.00919921	0.224603	0.203461	ARID2/RIF1	2	3
GO:0045911	positive regulation of DNA recombination	2/64	36/14113	0.0115495	0.237435	0.215085	ARID2/RIF1	2	3
GO:0045739	positive regulation of DNA repair	2/64	53/14113	0.0240496	0.287903	0.260803	ARID2/RIF1	2	3
GO:0006303	double-strand break repair via nonhomologous end joining	2/64	54/14113	0.0249026	0.291817	0.264348	RIF1/ATP23	2	3
GO:0034728	nucleosome organization	2/64	55/14113	0.0257679	0.297763	0.269734	ARID2/NFE2	2	3
GO:0000726	non-recombinational repair	2/64	60/14113	0.030274	0.322922	0.292526	RIF1/ATP23	2	3
GO:2000779	regulation of double-strand break repair	2/64	61/14113	0.0312102	0.324586	0.294033	ARID2/RIF1	2	3
GO:0022411	cellular component disassembly	5/64	398/14113	0.0341342	0.325353	0.294727	ARID2/CKAP2/RB1CC1/NFE2/BECN1	5	3
GO:0006302	double-strand break repair	3/64	159/14113	0.0354687	0.325353	0.294727	ARID2/RIF1/ATP23	3	3
GO:2001020	regulation of response to DNA damage stimulus	3/64	163/14113	0.0377517	0.325353	0.294727	ARID2/RIF1/KMT5A	3	3
GO:0000018	regulation of DNA recombination	2/64	71/14113	0.0411808	0.325353	0.294727	ARID2/RIF1	2	3
GO:0006348	chromatin silencing at telomere	1/64	10/14113	0.0444478	0.325353	0.294727	RIF1	1	3
GO:0000724	double-strand break repair via homologous recombination	2/64	77/14113	0.0476624	0.325353	0.294727	ARID2/RIF1	2	3
GO:0000725	recombinational repair	2/64	78/14113	0.0487769	0.325353	0.294727	ARID2/RIF1	2	3
GO:2001022	positive regulation of response to DNA damage stimulus	2/64	79/14113	0.0499009	0.325353	0.294727	ARID2/RIF1	2	3
GO:0051147	regulation of muscle cell differentiation	4/64	136/14113	0.00335236	0.159381	0.144378	ANKRD17/CDH15/NKX2-5/CTNNA1	4	4
GO:0006367	transcription initiation from RNA polymerase II promoter	3/64	114/14113	0.0149654	0.262069	0.237401	TAF3/NKX2-5/NR0B2	3	4
GO:0051148	negative regulation of muscle cell differentiation	2/64	49/14113	0.0207626	0.283189	0.256532	ANKRD17/NKX2-5	2	4
GO:0060038	cardiac muscle cell proliferation	2/64	49/14113	0.0207626	0.283189	0.256532	ARID2/NKX2-5	2	4
GO:0006352	DNA-templated transcription, initiation	3/64	132/14113	0.0220197	0.287443	0.260386	TAF3/NKX2-5/NR0B2	3	4
GO:0014855	striated muscle cell proliferation	2/64	62/14113	0.0321579	0.325353	0.294727	ARID2/NKX2-5	2	4
GO:0035265	organ growth	3/64	155/14113	0.0332602	0.325353	0.294727	ARID2/CARM1/NKX2-5	3	4
GO:0003211	cardiac ventricle formation	1/64	10/14113	0.0444478	0.325353	0.294727	NKX2-5	1	4
GO:0055017	cardiac muscle tissue growth	2/64	75/14113	0.0454624	0.325353	0.294727	ARID2/NKX2-5	2	4
GO:0071168	protein localization to chromatin	2/64	15/14113	0.00204631	0.158234	0.143339	CARM1/LEMD2	2	5
GO:0045600	positive regulation of fat cell differentiation	3/64	67/14113	0.0034652	0.159796	0.144754	RREB1/CARM1/CEBPB	3	5
GO:0098781	ncRNA transcription	2/64	27/14113	0.00660528	0.200806	0.181904	IPPK/SP1	2	5
GO:0048511	rhythmic process	5/64	262/14113	0.00663721	0.200806	0.181904	SP1/GNAQ/CSNK2A1/NR0B2/RPE65	5	5
GO:0072331	signal transduction by p53 class mediator	4/64	182/14113	0.00931775	0.224603	0.203461	TAF3/CARM1/KMT5A/CSNK2A1	4	5
GO:0034502	protein localization to chromosome	2/64	35/14113	0.0109396	0.233378	0.211411	CARM1/LEMD2	2	5
GO:0045216	cell-cell junction organization	4/64	194/14113	0.0115794	0.237435	0.215085	CDH15/CTNNA1/PRKCI/AJM1	4	5
GO:1901796	regulation of signal transduction by p53 class mediator	3/64	111/14113	0.0139373	0.252084	0.228355	TAF3/KMT5A/CSNK2A1	3	5
GO:0000377	RNA splicing, via transesterification reactions with bulged adenosine as nucleophile	3/64	117/14113	0.0160353	0.262069	0.237401	LUC7L2/HNRNPA0/RBM23	3	5
GO:0000398	mRNA splicing, via spliceosome	3/64	117/14113	0.0160353	0.262069	0.237401	LUC7L2/HNRNPA0/RBM23	3	5
GO:0000375	RNA splicing, via transesterification reactions	3/64	119/14113	0.016772	0.266683	0.24158	LUC7L2/HNRNPA0/RBM23	3	5
GO:0042461	photoreceptor cell development	2/64	44/14113	0.0169452	0.266683	0.24158	PRKCI/RPE65	2	5
GO:0050873	brown fat cell differentiation	2/64	47/14113	0.019196	0.27854	0.252321	RREB1/CEBPB	2	5
GO:0051983	regulation of chromosome segregation	2/64	47/14113	0.019196	0.27854	0.252321	CSNK2A1/BECN1	2	5
GO:0001541	ovarian follicle development	2/64	49/14113	0.0207626	0.283189	0.256532	CEBPB/CTNNA1	2	5
GO:0061912	selective autophagy	2/64	51/14113	0.0223808	0.287443	0.260386	RB1CC1/BECN1	2	5
GO:0009584	detection of visible light	2/64	54/14113	0.0249026	0.291817	0.264348	GNAQ/RPE65	2	5
GO:0031100	animal organ regeneration	2/64	58/14113	0.0284361	0.315451	0.285758	CEBPB/NR0B2	2	5
GO:0071230	cellular response to amino acid stimulus	2/64	58/14113	0.0284361	0.315451	0.285758	IPO5/CEBPB	2	5
GO:0046530	photoreceptor cell differentiation	2/64	59/14113	0.0293492	0.318661	0.288666	PRKCI/RPE65	2	5
GO:0051301	cell division	5/64	391/14113	0.0319762	0.325353	0.294727	UBE2S/CKAP2/KMT5A/HAUS2/BECN1	5	5
GO:0009247	glycolipid biosynthetic process	2/64	63/14113	0.0331169	0.325353	0.294727	PIGS/UGCG	2	5
GO:0034332	adherens junction organization	2/64	63/14113	0.0331169	0.325353	0.294727	CDH15/CTNNA1	2	5
GO:0071229	cellular response to acid chemical	2/64	64/14113	0.034087	0.325353	0.294727	IPO5/CEBPB	2	5
GO:0009583	detection of light stimulus	2/64	65/14113	0.0350682	0.325353	0.294727	GNAQ/RPE65	2	5
GO:0031099	regeneration	3/64	167/14113	0.0401085	0.325353	0.294727	CEBPB/CTNNA1/NR0B2	3	5
GO:0000422	autophagy of mitochondrion	2/64	70/14113	0.0401357	0.325353	0.294727	RB1CC1/BECN1	2	5
GO:0061726	mitochondrion disassembly	2/64	70/14113	0.0401357	0.325353	0.294727	RB1CC1/BECN1	2	5
GO:0008380	RNA splicing	3/64	168/14113	0.0407092	0.325353	0.294727	LUC7L2/HNRNPA0/RBM23	3	5
GO:0010992	ubiquitin recycling	1/64	10/14113	0.0444478	0.325353	0.294727	UBE2S	1	5
GO:0034350	regulation of glial cell apoptotic process	1/64	10/14113	0.0444478	0.325353	0.294727	PRKCI	1	5
GO:0042428	serotonin metabolic process	1/64	10/14113	0.0444478	0.325353	0.294727	GRIN2A	1	5
GO:0045793	positive regulation of cell size	1/64	10/14113	0.0444478	0.325353	0.294727	RB1CC1	1	5
GO:0051984	positive regulation of chromosome segregation	1/64	10/14113	0.0444478	0.325353	0.294727	BECN1	1	5
GO:0071257	cellular response to electrical stimulus	1/64	10/14113	0.0444478	0.325353	0.294727	RPE65	1	5
GO:1904668	positive regulation of ubiquitin protein ligase activity	1/64	10/14113	0.0444478	0.325353	0.294727	UBE2S	1	5
GO:0043297	apical junction assembly	2/64	75/14113	0.0454624	0.325353	0.294727	CTNNA1/PRKCI	2	5
GO:0006020	inositol metabolic process	1/64	11/14113	0.0487842	0.325353	0.294727	IPPK	1	5
GO:0006995	cellular response to nitrogen starvation	1/64	11/14113	0.0487842	0.325353	0.294727	BECN1	1	5
GO:0033210	leptin-mediated signaling pathway	1/64	11/14113	0.0487842	0.325353	0.294727	UGCG	1	5
GO:0043562	cellular response to nitrogen levels	1/64	11/14113	0.0487842	0.325353	0.294727	BECN1	1	5
GO:0043928	exonucleolytic catabolism of deadenylated mRNA	1/64	11/14113	0.0487842	0.325353	0.294727	NT5C3B	1	5
GO:2000392	regulation of lamellipodium morphogenesis	1/64	11/14113	0.0487842	0.325353	0.294727	RREB1	1	5
GO:2001198	regulation of dendritic cell differentiation	1/64	11/14113	0.0487842	0.325353	0.294727	CEBPB	1	5
GO:0033598	mammary gland epithelial cell proliferation	3/64	22/14113	0.000128798	0.0714398	0.0647152	RREB1/CEBPB/GATA3	3	6
GO:0016571	histone methylation	4/64	102/14113	0.00117185	0.143945	0.130396	RIF1/CARM1/GATA3/KMT5A	4	6
GO:0033599	regulation of mammary gland epithelial cell proliferation	2/64	12/14113	0.00129758	0.143945	0.130396	RREB1/GATA3	2	6
GO:0045598	regulation of fat cell differentiation	4/64	126/14113	0.0025454	0.158234	0.143339	RREB1/CARM1/CEBPB/GATA3	4	6
GO:0006479	protein methylation	4/64	131/14113	0.00292986	0.158234	0.143339	RIF1/CARM1/GATA3/KMT5A	4	6
GO:0008213	protein alkylation	4/64	131/14113	0.00292986	0.158234	0.143339	RIF1/CARM1/GATA3/KMT5A	4	6
GO:0061180	mammary gland epithelium development	3/64	64/14113	0.00304296	0.158234	0.143339	RREB1/CEBPB/GATA3	3	6
GO:0003215	cardiac right ventricle morphogenesis	2/64	19/14113	0.00329386	0.159381	0.144378	GATA3/NKX2-5	2	6
GO:0032753	positive regulation of interleukin-4 production	2/64	23/14113	0.00481686	0.170537	0.154485	CEBPB/GATA3	2	6
GO:0060037	pharyngeal system development	2/64	25/14113	0.00567851	0.181712	0.164608	GATA3/NKX2-5	2	6
GO:0034968	histone lysine methylation	3/64	84/14113	0.0065265	0.200806	0.181904	RIF1/GATA3/KMT5A	3	6
GO:0032673	regulation of interleukin-4 production	2/64	30/14113	0.0081149	0.224603	0.203461	CEBPB/GATA3	2	6
GO:0018022	peptidyl-lysine methylation	3/64	96/14113	0.00941792	0.224603	0.203461	RIF1/GATA3/KMT5A	3	6
GO:0048732	gland development	6/64	402/14113	0.00959675	0.224603	0.203461	RREB1/CEBPB/GATA3/NKX2-5/RB1CC1/PAX8	6	6
GO:0032633	interleukin-4 production	2/64	33/14113	0.0097643	0.224603	0.203461	CEBPB/GATA3	2	6
GO:2001252	positive regulation of chromosome organization	3/64	106/14113	0.0123166	0.238312	0.21588	RIF1/GATA3/BECN1	3	6
GO:0061647	histone H3-K9 modification	2/64	40/14113	0.0141345	0.252901	0.229096	RIF1/GATA3	2	6
GO:0045444	fat cell differentiation	4/64	211/14113	0.0153472	0.262069	0.237401	RREB1/CARM1/CEBPB/GATA3	4	6
GO:0031060	regulation of histone methylation	2/64	43/14113	0.0162218	0.262069	0.237401	RIF1/GATA3	2	6
GO:2000351	regulation of endothelial cell apoptotic process	2/64	47/14113	0.019196	0.27854	0.252321	GATA3/PRKCI	2	6
GO:0043414	macromolecule methylation	4/64	226/14113	0.0192501	0.27854	0.252321	RIF1/CARM1/GATA3/KMT5A	4	6
GO:0010634	positive regulation of epithelial cell migration	3/64	127/14113	0.019907	0.283121	0.256471	SP1/RREB1/GATA3	3	6
GO:0030879	mammary gland development	3/64	127/14113	0.019907	0.283121	0.256471	RREB1/CEBPB/GATA3	3	6
GO:0006584	catecholamine metabolic process	2/64	51/14113	0.0223808	0.287443	0.260386	GATA3/GRIN2A	2	6
GO:0009712	catechol-containing compound metabolic process	2/64	51/14113	0.0223808	0.287443	0.260386	GATA3/GRIN2A	2	6
GO:0001667	ameboidal-type cell migration	5/64	362/14113	0.0239661	0.287903	0.260803	ILK/SP1/RREB1/GATA3/PKN3	5	6
GO:0072577	endothelial cell apoptotic process	2/64	53/14113	0.0240496	0.287903	0.260803	GATA3/PRKCI	2	6
GO:0090596	sensory organ morphogenesis	4/64	254/14113	0.0280647	0.315451	0.285758	GATA3/PRKCI/RPE65/PAX8	4	6
GO:0010631	epithelial cell migration	4/64	258/14113	0.0294915	0.318661	0.288666	SP1/RREB1/GATA3/PKN3	4	6
GO:0090132	epithelium migration	4/64	260/14113	0.0302208	0.322922	0.292526	SP1/RREB1/GATA3/PKN3	4	6
GO:0032259	methylation	4/64	266/14113	0.0324731	0.325353	0.294727	RIF1/CARM1/GATA3/KMT5A	4	6
GO:0090130	tissue migration	4/64	266/14113	0.0324731	0.325353	0.294727	SP1/RREB1/GATA3/PKN3	4	6
GO:0043627	response to estrogen	2/64	67/14113	0.0370632	0.325353	0.294727	GATA3/CTNNA1	2	6
GO:0031058	positive regulation of histone modification	2/64	68/14113	0.0380768	0.325353	0.294727	RIF1/GATA3	2	6
GO:0048568	embryonic organ development	5/64	411/14113	0.0383792	0.325353	0.294727	ARID2/CEBPB/GATA3/NKX2-5/PAX8	5	6
GO:0003208	cardiac ventricle morphogenesis	2/64	70/14113	0.0401357	0.325353	0.294727	GATA3/NKX2-5	2	6
GO:2000736	regulation of stem cell differentiation	2/64	71/14113	0.0411808	0.325353	0.294727	GATA3/NKX2-5	2	6
GO:1904035	regulation of epithelial cell apoptotic process	2/64	74/14113	0.044377	0.325353	0.294727	GATA3/PRKCI	2	6
GO:0002524	hypersensitivity	1/64	10/14113	0.0444478	0.325353	0.294727	GATA3	1	6
GO:0032754	positive regulation of interleukin-5 production	1/64	10/14113	0.0444478	0.325353	0.294727	GATA3	1	6
GO:0035860	glial cell-derived neurotrophic factor receptor signaling pathway	1/64	10/14113	0.0444478	0.325353	0.294727	GATA3	1	6
GO:0043970	histone H3-K9 acetylation	1/64	10/14113	0.0444478	0.325353	0.294727	GATA3	1	6
GO:0016579	protein deubiquitination	3/64	177/14113	0.0463204	0.325353	0.294727	USP18/GATA3/BECN1	3	6
GO:1905269	positive regulation of chromatin organization	2/64	77/14113	0.0476624	0.325353	0.294727	RIF1/GATA3	2	6
GO:2000551	regulation of T-helper 2 cell cytokine production	1/64	11/14113	0.0487842	0.325353	0.294727	GATA3	1	6
GO:0010667	negative regulation of cardiac muscle cell apoptotic process	3/64	18/14113	6.9136e-05	0.0714398	0.0647152	ILK/NKX2-5/PAX8	3	7
GO:0010664	negative regulation of striated muscle cell apoptotic process	3/64	20/14113	9.59632e-05	0.0714398	0.0647152	ILK/NKX2-5/PAX8	3	7
GO:0010656	negative regulation of muscle cell apoptotic process	3/64	30/14113	0.00033088	0.0970391	0.0879049	ILK/NKX2-5/PAX8	3	7
GO:0010665	regulation of cardiac muscle cell apoptotic process	3/64	30/14113	0.00033088	0.0970391	0.0879049	ILK/NKX2-5/PAX8	3	7
GO:0010662	regulation of striated muscle cell apoptotic process	3/64	32/14113	0.000401623	0.0970391	0.0879049	ILK/NKX2-5/PAX8	3	7
GO:0010659	cardiac muscle cell apoptotic process	3/64	33/14113	0.00044036	0.0970391	0.0879049	ILK/NKX2-5/PAX8	3	7
GO:0010658	striated muscle cell apoptotic process	3/64	35/14113	0.000524851	0.0970391	0.0879049	ILK/NKX2-5/PAX8	3	7
GO:0010660	regulation of muscle cell apoptotic process	3/64	54/14113	0.00187081	0.158234	0.143339	ILK/NKX2-5/PAX8	3	7
GO:0010657	muscle cell apoptotic process	3/64	58/14113	0.0022975	0.158234	0.143339	ILK/NKX2-5/PAX8	3	7
GO:0030878	thyroid gland development	2/64	20/14113	0.00364919	0.159796	0.144754	NKX2-5/PAX8	2	7
GO:0060561	apoptotic process involved in morphogenesis	2/64	25/14113	0.00567851	0.181712	0.164608	NKX2-5/PAX8	2	7
GO:1902742	apoptotic process involved in development	2/64	35/14113	0.0109396	0.233378	0.211411	NKX2-5/PAX8	2	7
GO:0001658	branching involved in ureteric bud morphogenesis	2/64	57/14113	0.0275348	0.311686	0.282347	ILK/PAX8	2	7
GO:0048645	animal organ formation	2/64	64/14113	0.034087	0.325353	0.294727	LEMD2/PAX8	2	7
GO:2001054	negative regulation of mesenchymal cell apoptotic process	1/64	10/14113	0.0444478	0.325353	0.294727	PAX8	1	7
GO:0072173	metanephric tubule morphogenesis	1/64	11/14113	0.0487842	0.325353	0.294727	PAX8	1	7
GO:0072205	metanephric collecting duct development	1/64	11/14113	0.0487842	0.325353	0.294727	PAX8	1	7
GO:0016055	Wnt signaling pathway	7/64	422/14113	0.00290856	0.158234	0.143339	FERMT2/ILK/GATA3/GNAQ/CSNK2A1/NKX2-5/CALCOCO1	7	8
GO:0198738	cell-cell signaling by wnt	7/64	423/14113	0.00294706	0.158234	0.143339	FERMT2/ILK/GATA3/GNAQ/CSNK2A1/NKX2-5/CALCOCO1	7	8
GO:2000178	negative regulation of neural precursor cell proliferation	2/64	22/14113	0.00441084	0.170537	0.154485	ILK/CTNNA1	2	8
GO:0003007	heart morphogenesis	5/64	239/14113	0.00452152	0.170537	0.154485	ARID2/ILK/GATA3/NKX2-5/LEMD2	5	8
GO:0034446	substrate adhesion-dependent cell spreading	3/64	91/14113	0.00813674	0.224603	0.203461	FERMT2/ILK/RREB1	3	8
GO:0043523	regulation of neuron apoptotic process	4/64	185/14113	0.00985336	0.224603	0.203461	ILK/CEBPB/GATA3/PRKCI	4	8
GO:0007229	integrin-mediated signaling pathway	3/64	99/14113	0.01024	0.227192	0.205807	FERMT2/ILK/CTNNA1	3	8
GO:0007163	establishment or maintenance of cell polarity	4/64	188/14113	0.0104086	0.227895	0.206443	ILK/GATA3/CTNNA1/PRKCI	4	8
GO:0007596	blood coagulation	5/64	309/14113	0.0129608	0.247893	0.224559	ILK/GATA3/GNAQ/FIBP/NFE2	5	8
GO:0045197	establishment or maintenance of epithelial cell apical/basal polarity	2/64	39/14113	0.0134668	0.252084	0.228355	ILK/PRKCI	2	8
GO:0050817	coagulation	5/64	313/14113	0.0136389	0.252084	0.228355	ILK/GATA3/GNAQ/FIBP/NFE2	5	8
GO:0007599	hemostasis	5/64	314/14113	0.0138121	0.252084	0.228355	ILK/GATA3/GNAQ/FIBP/NFE2	5	8
GO:0006469	negative regulation of protein kinase activity	4/64	207/14113	0.0143993	0.254898	0.230904	ILK/IPO5/GNAQ/DBNDD1	4	8
GO:0051402	neuron apoptotic process	4/64	212/14113	0.0155902	0.262069	0.237401	ILK/CEBPB/GATA3/PRKCI	4	8
GO:0035088	establishment or maintenance of apical/basal cell polarity	2/64	43/14113	0.0162218	0.262069	0.237401	ILK/PRKCI	2	8
GO:0061245	establishment or maintenance of bipolar cell polarity	2/64	43/14113	0.0162218	0.262069	0.237401	ILK/PRKCI	2	8
GO:0033673	negative regulation of kinase activity	4/64	223/14113	0.0184249	0.27854	0.252321	ILK/IPO5/GNAQ/DBNDD1	4	8
GO:0050878	regulation of body fluid levels	6/64	466/14113	0.0187226	0.27854	0.252321	ILK/GATA3/GNAQ/UGCG/FIBP/NFE2	6	8
GO:0042060	wound healing	6/64	476/14113	0.0205525	0.283189	0.256532	ILK/RREB1/GATA3/GNAQ/FIBP/NFE2	6	8
GO:0043524	negative regulation of neuron apoptotic process	3/64	131/14113	0.0215877	0.287443	0.260386	ILK/CEBPB/PRKCI	3	8
GO:0001933	negative regulation of protein phosphorylation	5/64	361/14113	0.0237161	0.287903	0.260803	ILK/IPO5/GNAQ/LEMD2/DBNDD1	5	8
GO:0051348	negative regulation of transferase activity	4/64	241/14113	0.0237193	0.287903	0.260803	ILK/IPO5/GNAQ/DBNDD1	4	8
GO:0045669	positive regulation of osteoblast differentiation	2/64	55/14113	0.0257679	0.297763	0.269734	ILK/CEBPB	2	8
GO:2000146	negative regulation of cell motility	4/64	256/14113	0.0287728	0.317072	0.287226	ARID2/ILK/GATA3/CTNNA1	4	8
GO:0070527	platelet aggregation	2/64	59/14113	0.0293492	0.318661	0.288666	ILK/FIBP	2	8
GO:0030168	platelet activation	3/64	151/14113	0.0311263	0.324586	0.294033	ILK/GNAQ/FIBP	3	8
GO:0071772	response to BMP	3/64	151/14113	0.0311263	0.324586	0.294033	ILK/GATA3/LEMD2	3	8
GO:0071773	cellular response to BMP stimulus	3/64	151/14113	0.0311263	0.324586	0.294033	ILK/GATA3/LEMD2	3	8
GO:0042326	negative regulation of phosphorylation	5/64	392/14113	0.032279	0.325353	0.294727	ILK/IPO5/GNAQ/LEMD2/DBNDD1	5	8
GO:0060070	canonical Wnt signaling pathway	4/64	273/14113	0.0352228	0.325353	0.294727	ILK/GATA3/GNAQ/NKX2-5	4	8
GO:0018105	peptidyl-serine phosphorylation	4/64	274/14113	0.0356264	0.325353	0.294727	ILK/CSNK2A1/PRKCI/PKN3	4	8
GO:1901214	regulation of neuron death	4/64	280/14113	0.0381046	0.325353	0.294727	ILK/CEBPB/GATA3/PRKCI	4	8
GO:0040013	negative regulation of locomotion	4/64	286/14113	0.0406803	0.325353	0.294727	ARID2/ILK/GATA3/CTNNA1	4	8
GO:0051271	negative regulation of cellular component movement	4/64	288/14113	0.0415605	0.325353	0.294727	ARID2/ILK/GATA3/CTNNA1	4	8
GO:0033002	muscle cell proliferation	3/64	172/14113	0.0431577	0.325353	0.294727	ARID2/ILK/NKX2-5	3	8
GO:0018209	peptidyl-serine modification	4/64	294/14113	0.0442663	0.325353	0.294727	ILK/CSNK2A1/PRKCI/PKN3	4	8
GO:0003151	outflow tract morphogenesis	2/64	74/14113	0.044377	0.325353	0.294727	ILK/NKX2-5	2	8
GO:0030111	regulation of Wnt signaling pathway	4/64	304/14113	0.0489927	0.325353	0.294727	ILK/GNAQ/CSNK2A1/NKX2-5	4	8
