# Supplementary material for: Multi-Omic Analysis of CIC’s Functional Networks Reveals Novel Interaction Partners and a Potential Role in Mitotic Fidelity
Source: Cancers (Basel). 2023 May 17;15(10):2805. doi: 10.3390/cancers15102805 (PMC10216487; doi:10.3390/cancers15102805)
Supplement: Supplementary file 1 [file cancers-15-02805-s001.zip › Supplemental_Table_S4_combined_gene_hit_list.xlsx]

## Sheet: Detected_genes_lookup_table
Supplemental Table S4: Genes and proteins identified in the distinct multi-omic analyses in this study. a Summary table indicating whether a gene or its encoded protein was detected by the corresponding -omics assay indicated by the column name. CIC coessential gene: CIC’s predicted co-essential gene partners (Supplemental Table S1). CIC Genetic Interactor: CIC’s synthetic lethal genes predicted …
Hugo symbol	CIC coessential gene	CIC Genetic Interactor	HEK cell line IPMS	NHA cell line IPMS	scRNAseq differentially expressed genes	NHA line CIC ChIP-seq	mESC line CIC ChIP-seq	Differentially alternatively spliced	Total # of assays detecting gene
CIC	TRUE	FALSE	TRUE	TRUE	FALSE	FALSE	TRUE	FALSE	4
HNRNPA2B1	FALSE	FALSE	TRUE	TRUE	TRUE	FALSE	FALSE	TRUE	4
RPL7A	FALSE	FALSE	TRUE	TRUE	TRUE	FALSE	FALSE	TRUE	4
ATXN2L	FALSE	FALSE	TRUE	TRUE	TRUE	FALSE	FALSE	FALSE	3
DDX17	FALSE	FALSE	TRUE	TRUE	TRUE	FALSE	FALSE	FALSE	3
DDX5	FALSE	FALSE	TRUE	TRUE	TRUE	FALSE	FALSE	FALSE	3
DDX54	FALSE	FALSE	TRUE	FALSE	TRUE	FALSE	TRUE	FALSE	3
DUSP4	FALSE	FALSE	FALSE	FALSE	TRUE	TRUE	TRUE	FALSE	3
DUSP5	FALSE	FALSE	FALSE	FALSE	TRUE	TRUE	TRUE	FALSE	3
ETV4	FALSE	FALSE	FALSE	FALSE	TRUE	TRUE	TRUE	FALSE	3
ETV5	FALSE	FALSE	FALSE	FALSE	TRUE	TRUE	TRUE	FALSE	3
GLYR1	FALSE	FALSE	TRUE	TRUE	TRUE	FALSE	FALSE	FALSE	3
GNL3	FALSE	FALSE	TRUE	TRUE	TRUE	FALSE	FALSE	FALSE	3
HMGA2	FALSE	FALSE	FALSE	TRUE	TRUE	FALSE	FALSE	TRUE	3
HNRNPA0	FALSE	TRUE	TRUE	TRUE	FALSE	FALSE	FALSE	FALSE	3
HNRNPH3	FALSE	FALSE	TRUE	TRUE	TRUE	FALSE	FALSE	FALSE	3
ILF2	FALSE	FALSE	TRUE	TRUE	TRUE	FALSE	FALSE	FALSE	3
MAFF	FALSE	FALSE	FALSE	FALSE	TRUE	TRUE	TRUE	FALSE	3
NPM1	FALSE	FALSE	TRUE	TRUE	TRUE	FALSE	FALSE	FALSE	3
PABPC4	FALSE	FALSE	TRUE	TRUE	TRUE	FALSE	FALSE	FALSE	3
PLEC	FALSE	FALSE	TRUE	TRUE	TRUE	FALSE	FALSE	FALSE	3
RBMX	FALSE	FALSE	TRUE	TRUE	TRUE	FALSE	FALSE	FALSE	3
RPL12	FALSE	FALSE	TRUE	TRUE	TRUE	FALSE	FALSE	FALSE	3
RPL35A	FALSE	FALSE	TRUE	TRUE	FALSE	FALSE	FALSE	TRUE	3
SRSF3	FALSE	FALSE	TRUE	TRUE	TRUE	FALSE	FALSE	FALSE	3
SUGP2	FALSE	FALSE	TRUE	TRUE	TRUE	FALSE	FALSE	FALSE	3
SVIL	FALSE	FALSE	TRUE	FALSE	TRUE	FALSE	FALSE	TRUE	3
U2SURP	FALSE	FALSE	TRUE	TRUE	TRUE	FALSE	FALSE	FALSE	3
XRCC6	FALSE	FALSE	TRUE	TRUE	TRUE	FALSE	FALSE	FALSE	3
ATXN1L	TRUE	FALSE	FALSE	TRUE	FALSE	FALSE	FALSE	FALSE	2
BECN1	TRUE	TRUE	FALSE	FALSE	FALSE	FALSE	FALSE	FALSE	2
CNFN	TRUE	FALSE	FALSE	FALSE	TRUE	FALSE	FALSE	FALSE	2
DUSP6	TRUE	FALSE	FALSE	FALSE	FALSE	FALSE	TRUE	FALSE	2
ETHE1	TRUE	FALSE	FALSE	FALSE	TRUE	FALSE	FALSE	FALSE	2
FXR1	TRUE	FALSE	FALSE	TRUE	FALSE	FALSE	FALSE	FALSE	2
KCTD15	TRUE	FALSE	FALSE	FALSE	TRUE	FALSE	FALSE	FALSE	2
KEAP1	TRUE	FALSE	FALSE	FALSE	FALSE	FALSE	FALSE	TRUE	2
PEPD	TRUE	FALSE	FALSE	FALSE	TRUE	FALSE	FALSE	FALSE	2
RABAC1	TRUE	FALSE	FALSE	FALSE	TRUE	FALSE	FALSE	FALSE	2
SHKBP1	TRUE	FALSE	FALSE	FALSE	FALSE	FALSE	TRUE	FALSE	2
TIMM50	TRUE	FALSE	FALSE	FALSE	TRUE	FALSE	FALSE	FALSE	2
ABCF2	FALSE	FALSE	FALSE	TRUE	TRUE	FALSE	FALSE	FALSE	2
ACO1	FALSE	FALSE	FALSE	TRUE	TRUE	FALSE	FALSE	FALSE	2
ACTA2	FALSE	FALSE	FALSE	TRUE	TRUE	FALSE	FALSE	FALSE	2
ACTB	FALSE	FALSE	TRUE	TRUE	FALSE	FALSE	FALSE	FALSE	2
ADAR	FALSE	FALSE	TRUE	TRUE	FALSE	FALSE	FALSE	FALSE	2
ALDH18A1	FALSE	FALSE	TRUE	TRUE	FALSE	FALSE	FALSE	FALSE	2
ARID1A	FALSE	FALSE	FALSE	TRUE	FALSE	FALSE	FALSE	TRUE	2
ARID2	FALSE	TRUE	FALSE	TRUE	FALSE	FALSE	FALSE	FALSE	2
ASPH	FALSE	FALSE	FALSE	FALSE	TRUE	FALSE	FALSE	TRUE	2
ATAD3A	FALSE	FALSE	TRUE	TRUE	FALSE	FALSE	FALSE	FALSE	2
ATP1B3	FALSE	FALSE	FALSE	FALSE	TRUE	FALSE	FALSE	TRUE	2
C9orf16	FALSE	FALSE	FALSE	FALSE	TRUE	FALSE	FALSE	TRUE	2
CAV2	FALSE	FALSE	FALSE	FALSE	TRUE	FALSE	FALSE	TRUE	2
CBX3	FALSE	FALSE	FALSE	TRUE	TRUE	FALSE	FALSE	FALSE	2
CCNC	FALSE	FALSE	FALSE	FALSE	TRUE	FALSE	FALSE	TRUE	2
CCND1	FALSE	FALSE	FALSE	FALSE	FALSE	TRUE	TRUE	FALSE	2
CD59	FALSE	FALSE	FALSE	TRUE	TRUE	FALSE	FALSE	FALSE	2
CDC14A	FALSE	FALSE	FALSE	FALSE	FALSE	TRUE	TRUE	FALSE	2
CDC14B	FALSE	FALSE	FALSE	FALSE	FALSE	TRUE	TRUE	FALSE	2
CDC25B	FALSE	FALSE	FALSE	FALSE	TRUE	FALSE	FALSE	TRUE	2
CDC5L	FALSE	FALSE	TRUE	TRUE	FALSE	FALSE	FALSE	FALSE	2
CDK1	FALSE	FALSE	FALSE	TRUE	TRUE	FALSE	FALSE	FALSE	2
CKAP4	FALSE	FALSE	FALSE	TRUE	FALSE	FALSE	FALSE	TRUE	2
CLTB	FALSE	FALSE	FALSE	FALSE	TRUE	FALSE	FALSE	TRUE	2
CLUH	FALSE	FALSE	FALSE	FALSE	TRUE	FALSE	FALSE	TRUE	2
CRBN	FALSE	FALSE	FALSE	FALSE	TRUE	FALSE	FALSE	TRUE	2
CRNKL1	FALSE	FALSE	TRUE	TRUE	FALSE	FALSE	FALSE	FALSE	2
DBNDD1	FALSE	TRUE	FALSE	FALSE	FALSE	FALSE	FALSE	TRUE	2
DDX18	FALSE	FALSE	TRUE	TRUE	FALSE	FALSE	FALSE	FALSE	2
DDX21	FALSE	FALSE	TRUE	TRUE	FALSE	FALSE	FALSE	FALSE	2
DDX3X	FALSE	FALSE	TRUE	TRUE	FALSE	FALSE	FALSE	FALSE	2
DDX42	FALSE	FALSE	FALSE	FALSE	TRUE	FALSE	FALSE	TRUE	2
DDX47	FALSE	FALSE	TRUE	TRUE	FALSE	FALSE	FALSE	FALSE	2
DDX50	FALSE	FALSE	TRUE	TRUE	FALSE	FALSE	FALSE	FALSE	2
DDX52	FALSE	FALSE	TRUE	TRUE	FALSE	FALSE	FALSE	FALSE	2
DDX56	FALSE	FALSE	TRUE	FALSE	TRUE	FALSE	FALSE	FALSE	2
DHX15	FALSE	FALSE	TRUE	TRUE	FALSE	FALSE	FALSE	FALSE	2
DKC1	FALSE	FALSE	TRUE	TRUE	FALSE	FALSE	FALSE	FALSE	2
DNM1L	FALSE	FALSE	TRUE	TRUE	FALSE	FALSE	FALSE	FALSE	2
DSP	FALSE	FALSE	TRUE	FALSE	TRUE	FALSE	FALSE	FALSE	2
DUSP23	FALSE	FALSE	FALSE	TRUE	TRUE	FALSE	FALSE	FALSE	2
DYNC1LI1	FALSE	FALSE	FALSE	FALSE	TRUE	FALSE	FALSE	TRUE	2
EIF4A3	FALSE	FALSE	FALSE	TRUE	TRUE	FALSE	FALSE	FALSE	2
EIF4E	FALSE	FALSE	FALSE	TRUE	FALSE	FALSE	TRUE	FALSE	2
EIF4G1	FALSE	FALSE	FALSE	TRUE	TRUE	FALSE	FALSE	FALSE	2
ELAVL1	FALSE	FALSE	TRUE	TRUE	FALSE	FALSE	FALSE	FALSE	2
EPHA2	FALSE	FALSE	FALSE	FALSE	FALSE	TRUE	TRUE	FALSE	2
ETV1	FALSE	FALSE	FALSE	FALSE	TRUE	FALSE	TRUE	FALSE	2
FAM219A	FALSE	TRUE	FALSE	FALSE	TRUE	FALSE	FALSE	FALSE	2
FAM83D	FALSE	FALSE	FALSE	TRUE	FALSE	FALSE	TRUE	FALSE	2
FBXL5	FALSE	FALSE	FALSE	FALSE	TRUE	FALSE	FALSE	TRUE	2
FERMT2	FALSE	TRUE	FALSE	FALSE	TRUE	FALSE	FALSE	FALSE	2
FHL2	FALSE	FALSE	FALSE	TRUE	TRUE	FALSE	FALSE	FALSE	2
FMR1	FALSE	FALSE	TRUE	TRUE	FALSE	FALSE	FALSE	FALSE	2
FOSL1	FALSE	FALSE	FALSE	FALSE	TRUE	TRUE	FALSE	FALSE	2
FUBP3	FALSE	FALSE	TRUE	TRUE	FALSE	FALSE	FALSE	FALSE	2
FZD7	FALSE	FALSE	FALSE	FALSE	FALSE	TRUE	TRUE	FALSE	2
G3BP1	FALSE	FALSE	TRUE	TRUE	FALSE	FALSE	FALSE	FALSE	2
G3BP2	FALSE	FALSE	TRUE	TRUE	FALSE	FALSE	FALSE	FALSE	2
GAR1	FALSE	FALSE	TRUE	TRUE	FALSE	FALSE	FALSE	FALSE	2
GCC2	FALSE	FALSE	TRUE	FALSE	FALSE	FALSE	FALSE	TRUE	2
GNPDA2	FALSE	FALSE	FALSE	FALSE	TRUE	FALSE	FALSE	TRUE	2
GOLGA2	FALSE	FALSE	FALSE	FALSE	TRUE	FALSE	FALSE	TRUE	2
GPR3	FALSE	FALSE	FALSE	FALSE	FALSE	TRUE	TRUE	FALSE	2
GTPBP1	FALSE	FALSE	FALSE	FALSE	TRUE	FALSE	FALSE	TRUE	2
GTPBP4	FALSE	FALSE	TRUE	TRUE	FALSE	FALSE	FALSE	FALSE	2
GTSE1	FALSE	FALSE	FALSE	TRUE	TRUE	FALSE	FALSE	FALSE	2
H1FX	FALSE	FALSE	TRUE	TRUE	FALSE	FALSE	FALSE	FALSE	2
H2AFY	FALSE	FALSE	FALSE	TRUE	TRUE	FALSE	FALSE	FALSE	2
HCRTR1	FALSE	FALSE	FALSE	FALSE	FALSE	TRUE	TRUE	FALSE	2
HDAC7	FALSE	FALSE	FALSE	FALSE	TRUE	FALSE	FALSE	TRUE	2
HIST1H1D	FALSE	FALSE	FALSE	TRUE	TRUE	FALSE	FALSE	FALSE	2
HIST1H2BJ	FALSE	FALSE	FALSE	TRUE	TRUE	FALSE	FALSE	FALSE	2
HIST1H2BK	FALSE	FALSE	FALSE	TRUE	TRUE	FALSE	FALSE	FALSE	2
HMGA1	FALSE	FALSE	FALSE	TRUE	TRUE	FALSE	FALSE	FALSE	2
HMMR	FALSE	FALSE	TRUE	TRUE	FALSE	FALSE	FALSE	FALSE	2
HNRNPA1	FALSE	FALSE	TRUE	TRUE	FALSE	FALSE	FALSE	FALSE	2
HNRNPAB	FALSE	FALSE	TRUE	TRUE	FALSE	FALSE	FALSE	FALSE	2
HNRNPC	FALSE	FALSE	TRUE	TRUE	FALSE	FALSE	FALSE	FALSE	2
HNRNPD	FALSE	FALSE	TRUE	TRUE	FALSE	FALSE	FALSE	FALSE	2
HNRNPDL	FALSE	FALSE	TRUE	TRUE	FALSE	FALSE	FALSE	FALSE	2
HNRNPF	FALSE	FALSE	TRUE	TRUE	FALSE	FALSE	FALSE	FALSE	2
HNRNPH1	FALSE	FALSE	TRUE	TRUE	FALSE	FALSE	FALSE	FALSE	2
HNRNPH2	FALSE	FALSE	TRUE	TRUE	FALSE	FALSE	FALSE	FALSE	2
HNRNPK	FALSE	FALSE	TRUE	TRUE	FALSE	FALSE	FALSE	FALSE	2
HNRNPL	FALSE	FALSE	TRUE	TRUE	FALSE	FALSE	FALSE	FALSE	2
HNRNPM	FALSE	FALSE	TRUE	TRUE	FALSE	FALSE	FALSE	FALSE	2
HNRNPR	FALSE	FALSE	TRUE	TRUE	FALSE	FALSE	FALSE	FALSE	2
HNRNPU	FALSE	FALSE	TRUE	TRUE	FALSE	FALSE	FALSE	FALSE	2
HNRNPUL1	FALSE	FALSE	TRUE	TRUE	FALSE	FALSE	FALSE	FALSE	2
HP1BP3	FALSE	FALSE	TRUE	TRUE	FALSE	FALSE	FALSE	FALSE	2
HSPA5	FALSE	FALSE	FALSE	TRUE	TRUE	FALSE	FALSE	FALSE	2
HSPA8	FALSE	FALSE	TRUE	TRUE	FALSE	FALSE	FALSE	FALSE	2
HSPA9	FALSE	FALSE	TRUE	TRUE	FALSE	FALSE	FALSE	FALSE	2
HSPB1	FALSE	FALSE	FALSE	TRUE	TRUE	FALSE	FALSE	FALSE	2
HSPD1	FALSE	FALSE	TRUE	TRUE	FALSE	FALSE	FALSE	FALSE	2
HSPG2	FALSE	FALSE	FALSE	FALSE	TRUE	FALSE	TRUE	FALSE	2
ID1	FALSE	FALSE	FALSE	FALSE	FALSE	TRUE	TRUE	FALSE	2
IDNK	FALSE	FALSE	FALSE	FALSE	TRUE	FALSE	FALSE	TRUE	2
IGF2BP1	FALSE	FALSE	TRUE	TRUE	FALSE	FALSE	FALSE	FALSE	2
IGF2BP2	FALSE	FALSE	TRUE	TRUE	FALSE	FALSE	FALSE	FALSE	2
IGF2BP3	FALSE	FALSE	TRUE	TRUE	FALSE	FALSE	FALSE	FALSE	2
ILF3	FALSE	FALSE	TRUE	TRUE	FALSE	FALSE	FALSE	FALSE	2
IMMT	FALSE	FALSE	TRUE	FALSE	FALSE	FALSE	FALSE	TRUE	2
INA	FALSE	FALSE	FALSE	TRUE	TRUE	FALSE	FALSE	FALSE	2
IPO5	FALSE	TRUE	FALSE	FALSE	FALSE	FALSE	TRUE	FALSE	2
IPPK	FALSE	TRUE	FALSE	FALSE	TRUE	FALSE	FALSE	FALSE	2
KHDRBS1	FALSE	FALSE	TRUE	TRUE	FALSE	FALSE	FALSE	FALSE	2
KRI1	FALSE	FALSE	TRUE	TRUE	FALSE	FALSE	FALSE	FALSE	2
KRT1	FALSE	FALSE	TRUE	TRUE	FALSE	FALSE	FALSE	FALSE	2
KRT10	FALSE	FALSE	TRUE	TRUE	FALSE	FALSE	FALSE	FALSE	2
KRT14	FALSE	FALSE	TRUE	TRUE	FALSE	FALSE	FALSE	FALSE	2
KRT17	FALSE	FALSE	FALSE	TRUE	TRUE	FALSE	FALSE	FALSE	2
KRT18	FALSE	FALSE	TRUE	TRUE	FALSE	FALSE	FALSE	FALSE	2
KRT2	FALSE	FALSE	TRUE	TRUE	FALSE	FALSE	FALSE	FALSE	2
KRT5	FALSE	FALSE	TRUE	TRUE	FALSE	FALSE	FALSE	FALSE	2
KRT6B	FALSE	FALSE	TRUE	TRUE	FALSE	FALSE	FALSE	FALSE	2
KRT9	FALSE	FALSE	TRUE	TRUE	FALSE	FALSE	FALSE	FALSE	2
L3MBTL3	FALSE	FALSE	TRUE	TRUE	FALSE	FALSE	FALSE	FALSE	2
LAS1L	FALSE	FALSE	TRUE	TRUE	FALSE	FALSE	FALSE	FALSE	2
LIMA1	FALSE	FALSE	TRUE	TRUE	FALSE	FALSE	FALSE	FALSE	2
LMNB1	FALSE	FALSE	TRUE	TRUE	FALSE	FALSE	FALSE	FALSE	2
LMNB2	FALSE	FALSE	TRUE	FALSE	TRUE	FALSE	FALSE	FALSE	2
LOXL3	FALSE	FALSE	FALSE	FALSE	TRUE	FALSE	FALSE	TRUE	2
LRP8	FALSE	FALSE	FALSE	FALSE	FALSE	TRUE	TRUE	FALSE	2
LUZP1	FALSE	FALSE	TRUE	TRUE	FALSE	FALSE	FALSE	FALSE	2
LY6K	FALSE	FALSE	FALSE	FALSE	TRUE	FALSE	FALSE	TRUE	2
MAFG	FALSE	FALSE	FALSE	FALSE	FALSE	TRUE	TRUE	FALSE	2
MECP2	FALSE	FALSE	TRUE	TRUE	FALSE	FALSE	FALSE	FALSE	2
MGAT4B	FALSE	FALSE	FALSE	FALSE	TRUE	FALSE	FALSE	TRUE	2
MKI67	FALSE	FALSE	TRUE	TRUE	FALSE	FALSE	FALSE	FALSE	2
MYH10	FALSE	FALSE	TRUE	FALSE	TRUE	FALSE	FALSE	FALSE	2
MYH11	FALSE	FALSE	TRUE	FALSE	FALSE	FALSE	FALSE	TRUE	2
NAT10	FALSE	FALSE	TRUE	TRUE	FALSE	FALSE	FALSE	FALSE	2
NCBP1	FALSE	FALSE	TRUE	TRUE	FALSE	FALSE	FALSE	FALSE	2
NCL	FALSE	FALSE	TRUE	TRUE	FALSE	FALSE	FALSE	FALSE	2
NCOA5	FALSE	FALSE	TRUE	TRUE	FALSE	FALSE	FALSE	FALSE	2
NEXN	FALSE	FALSE	FALSE	FALSE	TRUE	FALSE	FALSE	TRUE	2
NF1	FALSE	FALSE	FALSE	FALSE	FALSE	TRUE	TRUE	FALSE	2
NONO	FALSE	FALSE	TRUE	TRUE	FALSE	FALSE	FALSE	FALSE	2
NOP56	FALSE	FALSE	TRUE	TRUE	FALSE	FALSE	FALSE	FALSE	2
NOP58	FALSE	FALSE	TRUE	TRUE	FALSE	FALSE	FALSE	FALSE	2
NRG1	FALSE	FALSE	FALSE	FALSE	TRUE	FALSE	FALSE	TRUE	2
NUFIP2	FALSE	FALSE	TRUE	TRUE	FALSE	FALSE	FALSE	FALSE	2
OSGIN1	FALSE	FALSE	FALSE	FALSE	TRUE	TRUE	FALSE	FALSE	2
PABPC1	FALSE	FALSE	TRUE	TRUE	FALSE	FALSE	FALSE	FALSE	2
PATZ1	FALSE	FALSE	FALSE	FALSE	TRUE	FALSE	FALSE	TRUE	2
PBRM1	FALSE	FALSE	TRUE	TRUE	FALSE	FALSE	FALSE	FALSE	2
PDCD5	FALSE	FALSE	FALSE	FALSE	TRUE	FALSE	FALSE	TRUE	2
PDE4DIP	FALSE	FALSE	FALSE	FALSE	TRUE	FALSE	FALSE	TRUE	2
PDHB	FALSE	FALSE	FALSE	FALSE	TRUE	FALSE	FALSE	TRUE	2
PDLIM7	FALSE	FALSE	FALSE	TRUE	TRUE	FALSE	FALSE	FALSE	2
PDZD2	FALSE	FALSE	FALSE	FALSE	FALSE	FALSE	TRUE	TRUE	2
PER2	FALSE	FALSE	FALSE	FALSE	FALSE	TRUE	TRUE	FALSE	2
PES1	FALSE	FALSE	TRUE	FALSE	TRUE	FALSE	FALSE	FALSE	2
PKN3	FALSE	TRUE	FALSE	FALSE	TRUE	FALSE	FALSE	FALSE	2
PLAC9	FALSE	FALSE	FALSE	FALSE	TRUE	FALSE	FALSE	TRUE	2
PLK3	FALSE	FALSE	FALSE	FALSE	FALSE	TRUE	TRUE	FALSE	2
POLDIP3	FALSE	FALSE	FALSE	TRUE	TRUE	FALSE	FALSE	FALSE	2
POLR3H	FALSE	FALSE	FALSE	FALSE	TRUE	FALSE	FALSE	TRUE	2
PPM1F	FALSE	FALSE	FALSE	FALSE	TRUE	FALSE	FALSE	TRUE	2
PPP1CB	FALSE	FALSE	FALSE	TRUE	FALSE	FALSE	FALSE	TRUE	2
PRKDC	FALSE	FALSE	TRUE	TRUE	FALSE	FALSE	FALSE	FALSE	2
PRPF19	FALSE	FALSE	TRUE	TRUE	FALSE	FALSE	FALSE	FALSE	2
PRPF3	FALSE	FALSE	TRUE	TRUE	FALSE	FALSE	FALSE	FALSE	2
PRPF8	FALSE	FALSE	TRUE	TRUE	FALSE	FALSE	FALSE	FALSE	2
PSIP1	FALSE	FALSE	TRUE	TRUE	FALSE	FALSE	FALSE	FALSE	2
PTBP1	FALSE	FALSE	TRUE	TRUE	FALSE	FALSE	FALSE	FALSE	2
PTPN9	FALSE	FALSE	FALSE	FALSE	FALSE	TRUE	TRUE	FALSE	2
PURA	FALSE	FALSE	FALSE	TRUE	FALSE	FALSE	FALSE	TRUE	2
RAP1B	FALSE	FALSE	FALSE	FALSE	TRUE	FALSE	FALSE	TRUE	2
RBBP4	FALSE	FALSE	FALSE	TRUE	FALSE	FALSE	FALSE	TRUE	2
RBM14	FALSE	FALSE	TRUE	TRUE	FALSE	FALSE	FALSE	FALSE	2
RBM39	FALSE	FALSE	TRUE	FALSE	FALSE	FALSE	FALSE	TRUE	2
RPL10A	FALSE	FALSE	TRUE	TRUE	FALSE	FALSE	FALSE	FALSE	2
RPL11	FALSE	FALSE	TRUE	TRUE	FALSE	FALSE	FALSE	FALSE	2
RPL13	FALSE	FALSE	TRUE	TRUE	FALSE	FALSE	FALSE	FALSE	2
RPL15	FALSE	FALSE	TRUE	TRUE	FALSE	FALSE	FALSE	FALSE	2
RPL19	FALSE	FALSE	TRUE	TRUE	FALSE	FALSE	FALSE	FALSE	2
RPL23A	FALSE	FALSE	TRUE	TRUE	FALSE	FALSE	FALSE	FALSE	2
RPL27	FALSE	FALSE	TRUE	TRUE	FALSE	FALSE	FALSE	FALSE	2
RPL29	FALSE	FALSE	TRUE	TRUE	FALSE	FALSE	FALSE	FALSE	2
RPL3	FALSE	FALSE	TRUE	TRUE	FALSE	FALSE	FALSE	FALSE	2
RPL30	FALSE	FALSE	TRUE	TRUE	FALSE	FALSE	FALSE	FALSE	2
RPL31	FALSE	FALSE	FALSE	TRUE	FALSE	FALSE	FALSE	TRUE	2
RPL36A	FALSE	FALSE	FALSE	TRUE	FALSE	FALSE	FALSE	TRUE	2
RPL4	FALSE	FALSE	TRUE	TRUE	FALSE	FALSE	FALSE	FALSE	2
RPL5	FALSE	FALSE	TRUE	TRUE	FALSE	FALSE	FALSE	FALSE	2
RPL6	FALSE	FALSE	TRUE	TRUE	FALSE	FALSE	FALSE	FALSE	2
RPL7	FALSE	FALSE	TRUE	TRUE	FALSE	FALSE	FALSE	FALSE	2
RPL8	FALSE	FALSE	TRUE	TRUE	FALSE	FALSE	FALSE	FALSE	2
RPS14	FALSE	FALSE	TRUE	TRUE	FALSE	FALSE	FALSE	FALSE	2
RPS15A	FALSE	FALSE	TRUE	TRUE	FALSE	FALSE	FALSE	FALSE	2
RPS16	FALSE	FALSE	TRUE	TRUE	FALSE	FALSE	FALSE	FALSE	2
RPS18	FALSE	FALSE	TRUE	TRUE	FALSE	FALSE	FALSE	FALSE	2
RPS19BP1	FALSE	FALSE	FALSE	FALSE	TRUE	FALSE	FALSE	TRUE	2
RPS2	FALSE	FALSE	FALSE	TRUE	TRUE	FALSE	FALSE	FALSE	2
RPS23	FALSE	FALSE	TRUE	TRUE	FALSE	FALSE	FALSE	FALSE	2
RPS24	FALSE	FALSE	TRUE	TRUE	FALSE	FALSE	FALSE	FALSE	2
RPS3A	FALSE	FALSE	TRUE	TRUE	FALSE	FALSE	FALSE	FALSE	2
RPS4X	FALSE	FALSE	TRUE	TRUE	FALSE	FALSE	FALSE	FALSE	2
RPS6	FALSE	FALSE	TRUE	TRUE	FALSE	FALSE	FALSE	FALSE	2
RPS8	FALSE	FALSE	TRUE	TRUE	FALSE	FALSE	FALSE	FALSE	2
RPS9	FALSE	FALSE	TRUE	TRUE	FALSE	FALSE	FALSE	FALSE	2
RSL1D1	FALSE	FALSE	TRUE	TRUE	FALSE	FALSE	FALSE	FALSE	2
RUVBL1	FALSE	FALSE	TRUE	TRUE	FALSE	FALSE	FALSE	FALSE	2
SAMD1	FALSE	FALSE	TRUE	TRUE	FALSE	FALSE	FALSE	FALSE	2
SF3B2	FALSE	FALSE	TRUE	TRUE	FALSE	FALSE	FALSE	FALSE	2
SFPQ	FALSE	FALSE	TRUE	TRUE	FALSE	FALSE	FALSE	FALSE	2
SIN3A	FALSE	FALSE	TRUE	TRUE	FALSE	FALSE	FALSE	FALSE	2
SLC25A5	FALSE	FALSE	TRUE	TRUE	FALSE	FALSE	FALSE	FALSE	2
SMAD3	FALSE	FALSE	FALSE	FALSE	TRUE	FALSE	FALSE	TRUE	2
SMARCA2	FALSE	FALSE	TRUE	TRUE	FALSE	FALSE	FALSE	FALSE	2
SMARCA5	FALSE	FALSE	TRUE	TRUE	FALSE	FALSE	FALSE	FALSE	2
SMARCC1	FALSE	FALSE	TRUE	TRUE	FALSE	FALSE	FALSE	FALSE	2
SMARCC2	FALSE	FALSE	TRUE	TRUE	FALSE	FALSE	FALSE	FALSE	2
SMDT1	FALSE	FALSE	FALSE	FALSE	TRUE	FALSE	FALSE	TRUE	2
SNRNP200	FALSE	FALSE	TRUE	FALSE	TRUE	FALSE	FALSE	FALSE	2
SNRPD2	FALSE	FALSE	FALSE	TRUE	TRUE	FALSE	FALSE	FALSE	2
SNW1	FALSE	FALSE	TRUE	TRUE	FALSE	FALSE	FALSE	FALSE	2
SPEG	FALSE	FALSE	FALSE	FALSE	TRUE	FALSE	FALSE	TRUE	2
SPHK1	FALSE	FALSE	FALSE	FALSE	TRUE	FALSE	FALSE	TRUE	2
SPRED2	FALSE	FALSE	FALSE	FALSE	FALSE	TRUE	TRUE	FALSE	2
SPRY4	FALSE	FALSE	FALSE	FALSE	FALSE	TRUE	TRUE	FALSE	2
SREBF1	FALSE	FALSE	FALSE	FALSE	TRUE	FALSE	FALSE	TRUE	2
SREBF2	FALSE	FALSE	FALSE	FALSE	TRUE	FALSE	TRUE	FALSE	2
SRRM1	FALSE	FALSE	TRUE	TRUE	FALSE	FALSE	FALSE	FALSE	2
SRSF7	FALSE	FALSE	TRUE	FALSE	TRUE	FALSE	FALSE	FALSE	2
SRSF9	FALSE	FALSE	TRUE	TRUE	FALSE	FALSE	FALSE	FALSE	2
SUN2	FALSE	FALSE	FALSE	FALSE	TRUE	FALSE	FALSE	TRUE	2
SYNCRIP	FALSE	FALSE	TRUE	TRUE	FALSE	FALSE	FALSE	FALSE	2
THY1	FALSE	FALSE	FALSE	FALSE	TRUE	FALSE	FALSE	TRUE	2
TMBIM1	FALSE	FALSE	FALSE	FALSE	TRUE	FALSE	FALSE	TRUE	2
TMED7	FALSE	FALSE	FALSE	FALSE	TRUE	FALSE	FALSE	TRUE	2
TMEM147	FALSE	FALSE	FALSE	FALSE	TRUE	FALSE	FALSE	TRUE	2
TNFRSF1A	FALSE	FALSE	FALSE	FALSE	TRUE	FALSE	FALSE	TRUE	2
TNS3	FALSE	TRUE	FALSE	FALSE	TRUE	FALSE	FALSE	FALSE	2
TOP1	FALSE	FALSE	TRUE	TRUE	FALSE	FALSE	FALSE	FALSE	2
TRIM28	FALSE	FALSE	TRUE	TRUE	FALSE	FALSE	FALSE	FALSE	2
TTLL12	FALSE	FALSE	FALSE	FALSE	TRUE	FALSE	TRUE	FALSE	2
TTN	FALSE	FALSE	TRUE	TRUE	FALSE	FALSE	FALSE	FALSE	2
TUBB	FALSE	FALSE	TRUE	TRUE	FALSE	FALSE	FALSE	FALSE	2
TXN2	FALSE	FALSE	FALSE	FALSE	TRUE	FALSE	FALSE	TRUE	2
U2AF2	FALSE	FALSE	TRUE	TRUE	FALSE	FALSE	FALSE	FALSE	2
UBTF	FALSE	FALSE	TRUE	FALSE	TRUE	FALSE	FALSE	FALSE	2
UNC13A	FALSE	FALSE	FALSE	FALSE	FALSE	TRUE	TRUE	FALSE	2
UPF1	FALSE	FALSE	TRUE	TRUE	FALSE	FALSE	FALSE	FALSE	2
UTP18	FALSE	FALSE	TRUE	TRUE	FALSE	FALSE	FALSE	FALSE	2
UTP3	FALSE	FALSE	TRUE	TRUE	FALSE	FALSE	FALSE	FALSE	2
VDAC2	FALSE	FALSE	FALSE	TRUE	FALSE	FALSE	FALSE	TRUE	2
VIM	FALSE	FALSE	TRUE	TRUE	FALSE	FALSE	FALSE	FALSE	2
XRCC5	FALSE	FALSE	TRUE	TRUE	FALSE	FALSE	FALSE	FALSE	2
YBX1	FALSE	FALSE	TRUE	TRUE	FALSE	FALSE	FALSE	FALSE	2
YLPM1	FALSE	FALSE	TRUE	TRUE	FALSE	FALSE	FALSE	FALSE	2
YWHAQ	FALSE	FALSE	FALSE	FALSE	TRUE	FALSE	FALSE	TRUE	2
ZDHHC5	FALSE	FALSE	FALSE	FALSE	FALSE	TRUE	TRUE	FALSE	2
ZNF326	FALSE	FALSE	TRUE	TRUE	FALSE	FALSE	FALSE	FALSE	2
ZNF638	FALSE	FALSE	TRUE	TRUE	FALSE	FALSE	FALSE	FALSE	2
ZSWIM4	FALSE	FALSE	FALSE	FALSE	FALSE	TRUE	TRUE	FALSE	2
ACP7	TRUE	FALSE	FALSE	FALSE	FALSE	FALSE	FALSE	FALSE	1
ALKBH7	TRUE	FALSE	FALSE	FALSE	FALSE	FALSE	FALSE	FALSE	1
ARHGAP33	TRUE	FALSE	FALSE	FALSE	FALSE	FALSE	FALSE	FALSE	1
ASPDH	TRUE	FALSE	FALSE	FALSE	FALSE	FALSE	FALSE	FALSE	1
BBC3	TRUE	FALSE	FALSE	FALSE	FALSE	FALSE	FALSE	FALSE	1
BICRA	TRUE	FALSE	FALSE	FALSE	FALSE	FALSE	FALSE	FALSE	1
BRSK1	TRUE	FALSE	FALSE	FALSE	FALSE	FALSE	FALSE	FALSE	1
C19orf12	TRUE	FALSE	FALSE	FALSE	FALSE	FALSE	FALSE	FALSE	1
CCDC9	TRUE	FALSE	FALSE	FALSE	FALSE	FALSE	FALSE	FALSE	1
CD320	TRUE	FALSE	FALSE	FALSE	FALSE	FALSE	FALSE	FALSE	1
CD37	TRUE	FALSE	FALSE	FALSE	FALSE	FALSE	FALSE	FALSE	1
CNTD2	TRUE	FALSE	FALSE	FALSE	FALSE	FALSE	FALSE	FALSE	1
CYP2S1	TRUE	FALSE	FALSE	FALSE	FALSE	FALSE	FALSE	FALSE	1
DEDD2	TRUE	FALSE	FALSE	FALSE	FALSE	FALSE	FALSE	FALSE	1
DYRK1B	TRUE	FALSE	FALSE	FALSE	FALSE	FALSE	FALSE	FALSE	1
ERF	TRUE	FALSE	FALSE	FALSE	FALSE	FALSE	FALSE	FALSE	1
ERICH4	TRUE	FALSE	FALSE	FALSE	FALSE	FALSE	FALSE	FALSE	1
ETV2	TRUE	FALSE	FALSE	FALSE	FALSE	FALSE	FALSE	FALSE	1
EXOC3L2	TRUE	FALSE	FALSE	FALSE	FALSE	FALSE	FALSE	FALSE	1
FBXO27	TRUE	FALSE	FALSE	FALSE	FALSE	FALSE	FALSE	FALSE	1
FFAR2	TRUE	FALSE	FALSE	FALSE	FALSE	FALSE	FALSE	FALSE	1
FLT3LG	TRUE	FALSE	FALSE	FALSE	FALSE	FALSE	FALSE	FALSE	1
FUZ	TRUE	FALSE	FALSE	FALSE	FALSE	FALSE	FALSE	FALSE	1
FXYD1	TRUE	FALSE	FALSE	FALSE	FALSE	FALSE	FALSE	FALSE	1
GNG8	TRUE	FALSE	FALSE	FALSE	FALSE	FALSE	FALSE	FALSE	1
GRAMD1A	TRUE	FALSE	FALSE	FALSE	FALSE	FALSE	FALSE	FALSE	1
GSK3A	TRUE	FALSE	FALSE	FALSE	FALSE	FALSE	FALSE	FALSE	1
ITPKC	TRUE	FALSE	FALSE	FALSE	FALSE	FALSE	FALSE	FALSE	1
JUND	TRUE	FALSE	FALSE	FALSE	FALSE	FALSE	FALSE	FALSE	1
KANK1	TRUE	FALSE	FALSE	FALSE	FALSE	FALSE	FALSE	FALSE	1
LGALS14	TRUE	FALSE	FALSE	FALSE	FALSE	FALSE	FALSE	FALSE	1
LGALS16	TRUE	FALSE	FALSE	FALSE	FALSE	FALSE	FALSE	FALSE	1
LGI4	TRUE	FALSE	FALSE	FALSE	FALSE	FALSE	FALSE	FALSE	1
LILRB5	TRUE	FALSE	FALSE	FALSE	FALSE	FALSE	FALSE	FALSE	1
MAP4K1	TRUE	FALSE	FALSE	FALSE	FALSE	FALSE	FALSE	FALSE	1
MEX3D	TRUE	FALSE	FALSE	FALSE	FALSE	FALSE	FALSE	FALSE	1
MIA	TRUE	FALSE	FALSE	FALSE	FALSE	FALSE	FALSE	FALSE	1
MPV17L2	TRUE	FALSE	FALSE	FALSE	FALSE	FALSE	FALSE	FALSE	1
NCCRP1	TRUE	FALSE	FALSE	FALSE	FALSE	FALSE	FALSE	FALSE	1
NFYB	TRUE	FALSE	FALSE	FALSE	FALSE	FALSE	FALSE	FALSE	1
PBX4	TRUE	FALSE	FALSE	FALSE	FALSE	FALSE	FALSE	FALSE	1
PHLDB3	TRUE	FALSE	FALSE	FALSE	FALSE	FALSE	FALSE	FALSE	1
PINLYP	TRUE	FALSE	FALSE	FALSE	FALSE	FALSE	FALSE	FALSE	1
PLA2G4C	TRUE	FALSE	FALSE	FALSE	FALSE	FALSE	FALSE	FALSE	1
PLEKHG2	TRUE	FALSE	FALSE	FALSE	FALSE	FALSE	FALSE	FALSE	1
PPFIA3	TRUE	FALSE	FALSE	FALSE	FALSE	FALSE	FALSE	FALSE	1
PRR19	TRUE	FALSE	FALSE	FALSE	FALSE	FALSE	FALSE	FALSE	1
PRX	TRUE	FALSE	FALSE	FALSE	FALSE	FALSE	FALSE	FALSE	1
PSG1	TRUE	FALSE	FALSE	FALSE	FALSE	FALSE	FALSE	FALSE	1
RASA1	TRUE	FALSE	FALSE	FALSE	FALSE	FALSE	FALSE	FALSE	1
SDHAF1	TRUE	FALSE	FALSE	FALSE	FALSE	FALSE	FALSE	FALSE	1
SERTAD3	TRUE	FALSE	FALSE	FALSE	FALSE	FALSE	FALSE	FALSE	1
SIRT2	TRUE	FALSE	FALSE	FALSE	FALSE	FALSE	FALSE	FALSE	1
SLC17A7	TRUE	FALSE	FALSE	FALSE	FALSE	FALSE	FALSE	FALSE	1
SLC7A9	TRUE	FALSE	FALSE	FALSE	FALSE	FALSE	FALSE	FALSE	1
SPPL3	TRUE	FALSE	FALSE	FALSE	FALSE	FALSE	FALSE	FALSE	1
SPTBN4	TRUE	FALSE	FALSE	FALSE	FALSE	FALSE	FALSE	FALSE	1
SULT2B1	TRUE	FALSE	FALSE	FALSE	FALSE	FALSE	FALSE	FALSE	1
SYCN	TRUE	FALSE	FALSE	FALSE	FALSE	FALSE	FALSE	FALSE	1
TGFB1	TRUE	FALSE	FALSE	FALSE	FALSE	FALSE	FALSE	FALSE	1
TTC9B	TRUE	FALSE	FALSE	FALSE	FALSE	FALSE	FALSE	FALSE	1
UPK1A	TRUE	FALSE	FALSE	FALSE	FALSE	FALSE	FALSE	FALSE	1
WDR87	TRUE	FALSE	FALSE	FALSE	FALSE	FALSE	FALSE	FALSE	1
YIF1B	TRUE	FALSE	FALSE	FALSE	FALSE	FALSE	FALSE	FALSE	1
ZCCHC12	TRUE	FALSE	FALSE	FALSE	FALSE	FALSE	FALSE	FALSE	1
ZNF155	TRUE	FALSE	FALSE	FALSE	FALSE	FALSE	FALSE	FALSE	1
ZNF224	TRUE	FALSE	FALSE	FALSE	FALSE	FALSE	FALSE	FALSE	1
ZNF226	TRUE	FALSE	FALSE	FALSE	FALSE	FALSE	FALSE	FALSE	1
ZNF461	TRUE	FALSE	FALSE	FALSE	FALSE	FALSE	FALSE	FALSE	1
ZNF534	TRUE	FALSE	FALSE	FALSE	FALSE	FALSE	FALSE	FALSE	1
ZNF566	TRUE	FALSE	FALSE	FALSE	FALSE	FALSE	FALSE	FALSE	1
ZNF569	TRUE	FALSE	FALSE	FALSE	FALSE	FALSE	FALSE	FALSE	1
ZNF571	TRUE	FALSE	FALSE	FALSE	FALSE	FALSE	FALSE	FALSE	1
ZNF780B	TRUE	FALSE	FALSE	FALSE	FALSE	FALSE	FALSE	FALSE	1
ZNF790	TRUE	FALSE	FALSE	FALSE	FALSE	FALSE	FALSE	FALSE	1
A1BG	FALSE	FALSE	FALSE	FALSE	TRUE	FALSE	FALSE	FALSE	1
A4GALT	FALSE	FALSE	FALSE	FALSE	TRUE	FALSE	FALSE	FALSE	1
AAGAB	FALSE	FALSE	FALSE	FALSE	FALSE	FALSE	FALSE	TRUE	1
AASDHPPT	FALSE	FALSE	FALSE	FALSE	TRUE	FALSE	FALSE	FALSE	1
ABCA1	FALSE	FALSE	FALSE	TRUE	FALSE	FALSE	FALSE	FALSE	1
ABCB8	FALSE	FALSE	FALSE	FALSE	FALSE	FALSE	FALSE	TRUE	1
ABCC1	FALSE	FALSE	FALSE	FALSE	TRUE	FALSE	FALSE	FALSE	1
ABCE1	FALSE	FALSE	FALSE	TRUE	FALSE	FALSE	FALSE	FALSE	1
ABCG2	FALSE	FALSE	FALSE	FALSE	TRUE	FALSE	FALSE	FALSE	1
ABCG5	FALSE	FALSE	FALSE	FALSE	FALSE	FALSE	FALSE	TRUE	1
ABHD14B	FALSE	FALSE	FALSE	FALSE	FALSE	FALSE	FALSE	TRUE	1
ABHD5	FALSE	FALSE	FALSE	FALSE	TRUE	FALSE	FALSE	FALSE	1
ABI2	FALSE	FALSE	FALSE	FALSE	FALSE	FALSE	FALSE	TRUE	1
ABLIM1	FALSE	FALSE	FALSE	FALSE	TRUE	FALSE	FALSE	FALSE	1
ABLIM3	FALSE	FALSE	FALSE	FALSE	TRUE	FALSE	FALSE	FALSE	1
ABT1	FALSE	FALSE	FALSE	TRUE	FALSE	FALSE	FALSE	FALSE	1
ACBD4	FALSE	FALSE	FALSE	FALSE	FALSE	FALSE	FALSE	TRUE	1
ACD	FALSE	FALSE	FALSE	FALSE	FALSE	FALSE	FALSE	TRUE	1
ACIN1	FALSE	FALSE	TRUE	FALSE	FALSE	FALSE	FALSE	FALSE	1
ACO2	FALSE	FALSE	FALSE	FALSE	TRUE	FALSE	FALSE	FALSE	1
ACOT4	FALSE	FALSE	FALSE	FALSE	TRUE	FALSE	FALSE	FALSE	1
ACP1	FALSE	FALSE	FALSE	FALSE	TRUE	FALSE	FALSE	FALSE	1
ACTC1	FALSE	FALSE	TRUE	FALSE	FALSE	FALSE	FALSE	FALSE	1
ACTN1	FALSE	FALSE	TRUE	FALSE	FALSE	FALSE	FALSE	FALSE	1
ACTN4	FALSE	FALSE	TRUE	FALSE	FALSE	FALSE	FALSE	FALSE	1
ADAM12	FALSE	FALSE	FALSE	FALSE	TRUE	FALSE	FALSE	FALSE	1
ADAMTS5	FALSE	FALSE	FALSE	FALSE	TRUE	FALSE	FALSE	FALSE	1
ADAMTSL1	FALSE	FALSE	FALSE	FALSE	TRUE	FALSE	FALSE	FALSE	1
ADARB1	FALSE	FALSE	FALSE	FALSE	TRUE	FALSE	FALSE	FALSE	1
ADD1	FALSE	FALSE	FALSE	FALSE	FALSE	FALSE	FALSE	TRUE	1
ADO	FALSE	FALSE	FALSE	FALSE	FALSE	TRUE	FALSE	FALSE	1
ADSS	FALSE	FALSE	FALSE	FALSE	TRUE	FALSE	FALSE	FALSE	1
AGPAT2	FALSE	FALSE	FALSE	FALSE	TRUE	FALSE	FALSE	FALSE	1
AGPAT5	FALSE	FALSE	FALSE	FALSE	FALSE	FALSE	FALSE	TRUE	1
AIF1L	FALSE	FALSE	FALSE	FALSE	FALSE	FALSE	FALSE	TRUE	1
AIFM1	FALSE	FALSE	FALSE	TRUE	FALSE	FALSE	FALSE	FALSE	1
AIMP2	FALSE	FALSE	FALSE	FALSE	TRUE	FALSE	FALSE	FALSE	1
AJM1	FALSE	TRUE	FALSE	FALSE	FALSE	FALSE	FALSE	FALSE	1
AKAP9	FALSE	FALSE	FALSE	FALSE	FALSE	FALSE	FALSE	TRUE	1
AKR1B1	FALSE	FALSE	FALSE	FALSE	TRUE	FALSE	FALSE	FALSE	1
AKR1B10	FALSE	FALSE	FALSE	FALSE	TRUE	FALSE	FALSE	FALSE	1
ALCAM	FALSE	FALSE	FALSE	FALSE	TRUE	FALSE	FALSE	FALSE	1
ALDH1A3	FALSE	FALSE	FALSE	FALSE	TRUE	FALSE	FALSE	FALSE	1
ALDH2	FALSE	FALSE	FALSE	FALSE	TRUE	FALSE	FALSE	FALSE	1
ALDH3A2	FALSE	FALSE	FALSE	FALSE	TRUE	FALSE	FALSE	FALSE	1
ALDH5A1	FALSE	FALSE	FALSE	FALSE	TRUE	FALSE	FALSE	FALSE	1
ALDH6A1	FALSE	FALSE	FALSE	FALSE	FALSE	FALSE	FALSE	TRUE	1
ALDH7A1	FALSE	FALSE	FALSE	FALSE	TRUE	FALSE	FALSE	FALSE	1
ALG13	FALSE	FALSE	FALSE	FALSE	TRUE	FALSE	FALSE	FALSE	1
ALG8	FALSE	FALSE	FALSE	FALSE	TRUE	FALSE	FALSE	FALSE	1
ALK	FALSE	FALSE	FALSE	FALSE	FALSE	FALSE	TRUE	FALSE	1
ALMS1	FALSE	FALSE	FALSE	TRUE	FALSE	FALSE	FALSE	FALSE	1
ALYREF	FALSE	FALSE	FALSE	TRUE	FALSE	FALSE	FALSE	FALSE	1
AMN1	FALSE	FALSE	FALSE	FALSE	FALSE	FALSE	FALSE	TRUE	1
AMOTL1	FALSE	FALSE	FALSE	FALSE	TRUE	FALSE	FALSE	FALSE	1
AMPH	FALSE	FALSE	FALSE	FALSE	TRUE	FALSE	FALSE	FALSE	1
ANAPC1	FALSE	FALSE	FALSE	FALSE	TRUE	FALSE	FALSE	FALSE	1
ANKDD1A	FALSE	FALSE	FALSE	FALSE	FALSE	FALSE	FALSE	TRUE	1
ANKEF1	FALSE	FALSE	FALSE	TRUE	FALSE	FALSE	FALSE	FALSE	1
ANKRD11	FALSE	FALSE	FALSE	FALSE	FALSE	FALSE	FALSE	TRUE	1
ANKRD17	FALSE	TRUE	FALSE	FALSE	FALSE	FALSE	FALSE	FALSE	1
ANKRD29	FALSE	FALSE	FALSE	FALSE	TRUE	FALSE	FALSE	FALSE	1
ANKRD42	FALSE	FALSE	FALSE	FALSE	FALSE	FALSE	FALSE	TRUE	1
ANKRD7	FALSE	FALSE	FALSE	TRUE	FALSE	FALSE	FALSE	FALSE	1
ANLN	FALSE	FALSE	FALSE	FALSE	TRUE	FALSE	FALSE	FALSE	1
ANP32B	FALSE	FALSE	FALSE	FALSE	TRUE	FALSE	FALSE	FALSE	1
ANP32E	FALSE	FALSE	FALSE	FALSE	TRUE	FALSE	FALSE	FALSE	1
ANTXR2	FALSE	FALSE	FALSE	FALSE	TRUE	FALSE	FALSE	FALSE	1
ANXA10	FALSE	FALSE	FALSE	FALSE	TRUE	FALSE	FALSE	FALSE	1
ANXA4	FALSE	FALSE	FALSE	FALSE	TRUE	FALSE	FALSE	FALSE	1
ANXA7	FALSE	FALSE	FALSE	FALSE	TRUE	FALSE	FALSE	FALSE	1
AP1B1	FALSE	FALSE	FALSE	FALSE	TRUE	FALSE	FALSE	FALSE	1
AP1G1	FALSE	FALSE	FALSE	FALSE	FALSE	FALSE	FALSE	TRUE	1
APC	FALSE	FALSE	FALSE	FALSE	FALSE	FALSE	FALSE	TRUE	1
APOBEC3B	FALSE	FALSE	FALSE	TRUE	FALSE	FALSE	FALSE	FALSE	1
APOBEC3C	FALSE	FALSE	FALSE	TRUE	FALSE	FALSE	FALSE	FALSE	1
AQR	FALSE	FALSE	TRUE	FALSE	FALSE	FALSE	FALSE	FALSE	1
AR	FALSE	FALSE	FALSE	FALSE	TRUE	FALSE	FALSE	FALSE	1
ARF4	FALSE	FALSE	FALSE	FALSE	TRUE	FALSE	FALSE	FALSE	1
ARHGAP24	FALSE	FALSE	FALSE	FALSE	TRUE	FALSE	FALSE	FALSE	1
ARHGDIA	FALSE	FALSE	FALSE	FALSE	FALSE	FALSE	FALSE	TRUE	1
ARHGEF17	FALSE	FALSE	TRUE	FALSE	FALSE	FALSE	FALSE	FALSE	1
ARHGEF18	FALSE	FALSE	FALSE	FALSE	TRUE	FALSE	FALSE	FALSE	1
ARHGEF33	FALSE	FALSE	FALSE	FALSE	FALSE	FALSE	FALSE	TRUE	1
ARHGEF4	FALSE	FALSE	FALSE	FALSE	FALSE	FALSE	FALSE	TRUE	1
ARHGEF6	FALSE	FALSE	FALSE	FALSE	TRUE	FALSE	FALSE	FALSE	1
ARID1B	FALSE	FALSE	FALSE	FALSE	FALSE	FALSE	FALSE	TRUE	1
ARID4B	FALSE	FALSE	FALSE	FALSE	TRUE	FALSE	FALSE	FALSE	1
ARID5B	FALSE	FALSE	FALSE	FALSE	TRUE	FALSE	FALSE	FALSE	1
ARIH1	FALSE	FALSE	FALSE	FALSE	FALSE	FALSE	FALSE	TRUE	1
ARL13B	FALSE	FALSE	FALSE	FALSE	FALSE	FALSE	FALSE	TRUE	1
ARL6IP1	FALSE	FALSE	FALSE	FALSE	TRUE	FALSE	FALSE	FALSE	1
ARL8B	FALSE	FALSE	FALSE	FALSE	TRUE	FALSE	FALSE	FALSE	1
ARL9	FALSE	FALSE	FALSE	FALSE	TRUE	FALSE	FALSE	FALSE	1
ARNTL2	FALSE	FALSE	FALSE	FALSE	FALSE	FALSE	FALSE	TRUE	1
ASCC2	FALSE	FALSE	FALSE	FALSE	TRUE	FALSE	FALSE	FALSE	1
ASIC3	FALSE	FALSE	FALSE	FALSE	FALSE	FALSE	FALSE	TRUE	1
ASIP	FALSE	FALSE	FALSE	FALSE	FALSE	FALSE	FALSE	TRUE	1
ASPHD1	FALSE	FALSE	FALSE	FALSE	FALSE	FALSE	FALSE	TRUE	1
ASS1	FALSE	FALSE	FALSE	FALSE	TRUE	FALSE	FALSE	FALSE	1
ATAD3B	FALSE	FALSE	TRUE	FALSE	FALSE	FALSE	FALSE	FALSE	1
ATAD3C	FALSE	FALSE	FALSE	TRUE	FALSE	FALSE	FALSE	FALSE	1
ATF4	FALSE	FALSE	FALSE	FALSE	TRUE	FALSE	FALSE	FALSE	1
ATG10	FALSE	FALSE	FALSE	FALSE	FALSE	FALSE	FALSE	TRUE	1
ATG101	FALSE	FALSE	FALSE	TRUE	FALSE	FALSE	FALSE	FALSE	1
ATG4D	FALSE	FALSE	FALSE	FALSE	TRUE	FALSE	FALSE	FALSE	1
ATG9A	FALSE	FALSE	FALSE	FALSE	FALSE	FALSE	FALSE	TRUE	1
ATN1	FALSE	FALSE	FALSE	FALSE	TRUE	FALSE	FALSE	FALSE	1
ATP1A1	FALSE	FALSE	FALSE	FALSE	TRUE	FALSE	FALSE	FALSE	1
ATP23	FALSE	TRUE	FALSE	FALSE	FALSE	FALSE	FALSE	FALSE	1
ATP5A1	FALSE	FALSE	FALSE	TRUE	FALSE	FALSE	FALSE	FALSE	1
ATP5C1	FALSE	FALSE	FALSE	TRUE	FALSE	FALSE	FALSE	FALSE	1
ATP5G3	FALSE	FALSE	FALSE	TRUE	FALSE	FALSE	FALSE	FALSE	1
ATP6AP1	FALSE	FALSE	FALSE	FALSE	FALSE	FALSE	FALSE	TRUE	1
ATP6AP2	FALSE	FALSE	FALSE	FALSE	TRUE	FALSE	FALSE	FALSE	1
ATP6V0B	FALSE	FALSE	FALSE	FALSE	FALSE	FALSE	FALSE	TRUE	1
ATP6V1H	FALSE	FALSE	FALSE	TRUE	FALSE	FALSE	FALSE	FALSE	1
ATRAID	FALSE	FALSE	FALSE	FALSE	TRUE	FALSE	FALSE	FALSE	1
ATRNL1	FALSE	FALSE	FALSE	FALSE	TRUE	FALSE	FALSE	FALSE	1
ATXN2	FALSE	FALSE	FALSE	TRUE	FALSE	FALSE	FALSE	FALSE	1
AZIN1	FALSE	FALSE	FALSE	FALSE	FALSE	FALSE	TRUE	FALSE	1
B4GALT1	FALSE	FALSE	FALSE	FALSE	TRUE	FALSE	FALSE	FALSE	1
B4GALT2	FALSE	FALSE	FALSE	FALSE	FALSE	FALSE	FALSE	TRUE	1
BACE1	FALSE	FALSE	FALSE	FALSE	FALSE	FALSE	FALSE	TRUE	1
BACE2	FALSE	FALSE	FALSE	FALSE	TRUE	FALSE	FALSE	FALSE	1
BAG1	FALSE	FALSE	FALSE	FALSE	TRUE	FALSE	FALSE	FALSE	1
BAG2	FALSE	FALSE	FALSE	TRUE	FALSE	FALSE	FALSE	FALSE	1
BAG3	FALSE	FALSE	FALSE	FALSE	TRUE	FALSE	FALSE	FALSE	1
BAMBI	FALSE	FALSE	FALSE	FALSE	TRUE	FALSE	FALSE	FALSE	1
BATF3	FALSE	FALSE	FALSE	FALSE	TRUE	FALSE	FALSE	FALSE	1
BAZ1B	FALSE	FALSE	TRUE	FALSE	FALSE	FALSE	FALSE	FALSE	1
BCAR3	FALSE	FALSE	FALSE	FALSE	FALSE	FALSE	FALSE	TRUE	1
BCAS2	FALSE	FALSE	FALSE	TRUE	FALSE	FALSE	FALSE	FALSE	1
BCL2L11	FALSE	FALSE	FALSE	FALSE	FALSE	FALSE	FALSE	TRUE	1
BCL2L12	FALSE	FALSE	FALSE	FALSE	TRUE	FALSE	FALSE	FALSE	1
BCL2L14	FALSE	FALSE	FALSE	FALSE	FALSE	FALSE	TRUE	FALSE	1
BCLAF1	FALSE	FALSE	TRUE	FALSE	FALSE	FALSE	FALSE	FALSE	1
BCR	FALSE	FALSE	FALSE	FALSE	TRUE	FALSE	FALSE	FALSE	1
BGN	FALSE	FALSE	FALSE	FALSE	TRUE	FALSE	FALSE	FALSE	1
BHLHE41	FALSE	FALSE	FALSE	FALSE	TRUE	FALSE	FALSE	FALSE	1
BICD2	FALSE	FALSE	FALSE	FALSE	TRUE	FALSE	FALSE	FALSE	1
BICDL1	FALSE	FALSE	FALSE	FALSE	FALSE	FALSE	FALSE	TRUE	1
BLVRA	FALSE	FALSE	FALSE	FALSE	TRUE	FALSE	FALSE	FALSE	1
BMS1	FALSE	FALSE	TRUE	FALSE	FALSE	FALSE	FALSE	FALSE	1
BNIPL	FALSE	FALSE	FALSE	FALSE	FALSE	FALSE	FALSE	TRUE	1
BOP1	FALSE	FALSE	TRUE	FALSE	FALSE	FALSE	FALSE	FALSE	1
BRAT1	FALSE	FALSE	FALSE	FALSE	FALSE	FALSE	FALSE	TRUE	1
BRD1	FALSE	FALSE	FALSE	FALSE	TRUE	FALSE	FALSE	FALSE	1
BRI3	FALSE	FALSE	FALSE	FALSE	TRUE	FALSE	FALSE	FALSE	1
BRIX1	FALSE	FALSE	TRUE	FALSE	FALSE	FALSE	FALSE	FALSE	1
BRSK2	FALSE	FALSE	FALSE	FALSE	TRUE	FALSE	FALSE	FALSE	1
BRWD1	FALSE	FALSE	FALSE	TRUE	FALSE	FALSE	FALSE	FALSE	1
BTD	FALSE	FALSE	FALSE	FALSE	FALSE	FALSE	FALSE	TRUE	1
BTF3L4	FALSE	FALSE	FALSE	FALSE	TRUE	FALSE	FALSE	FALSE	1
BTG1	FALSE	FALSE	FALSE	FALSE	TRUE	FALSE	FALSE	FALSE	1
BTG3	FALSE	FALSE	FALSE	FALSE	TRUE	FALSE	FALSE	FALSE	1
BZW1	FALSE	FALSE	FALSE	FALSE	FALSE	FALSE	FALSE	TRUE	1
BZW2	FALSE	FALSE	FALSE	FALSE	TRUE	FALSE	FALSE	FALSE	1
C10orf55	FALSE	FALSE	FALSE	FALSE	FALSE	FALSE	FALSE	TRUE	1
C11orf54	FALSE	FALSE	FALSE	TRUE	FALSE	FALSE	FALSE	FALSE	1
C11orf58	FALSE	FALSE	FALSE	FALSE	TRUE	FALSE	FALSE	FALSE	1
C11orf68	FALSE	FALSE	FALSE	FALSE	TRUE	FALSE	FALSE	FALSE	1
C11orf74	FALSE	FALSE	FALSE	FALSE	TRUE	FALSE	FALSE	FALSE	1
C12orf75	FALSE	FALSE	FALSE	FALSE	TRUE	FALSE	FALSE	FALSE	1
C12orf76	FALSE	FALSE	FALSE	FALSE	FALSE	FALSE	FALSE	TRUE	1
C14orf166	FALSE	FALSE	FALSE	TRUE	FALSE	FALSE	FALSE	FALSE	1
C14orf93	FALSE	FALSE	FALSE	FALSE	FALSE	FALSE	FALSE	TRUE	1
C19orf38	FALSE	FALSE	FALSE	FALSE	TRUE	FALSE	FALSE	FALSE	1
C19orf53	FALSE	FALSE	FALSE	TRUE	FALSE	FALSE	FALSE	FALSE	1
C19orf73	FALSE	FALSE	FALSE	FALSE	TRUE	FALSE	FALSE	FALSE	1
C1orf131	FALSE	FALSE	FALSE	FALSE	TRUE	FALSE	FALSE	FALSE	1
C1orf198	FALSE	FALSE	FALSE	FALSE	TRUE	FALSE	FALSE	FALSE	1
C22orf39	FALSE	FALSE	FALSE	FALSE	TRUE	FALSE	FALSE	FALSE	1
C2orf68	FALSE	FALSE	FALSE	FALSE	FALSE	FALSE	FALSE	TRUE	1
C3orf38	FALSE	FALSE	FALSE	FALSE	TRUE	FALSE	FALSE	FALSE	1
C3orf62	FALSE	FALSE	FALSE	FALSE	FALSE	FALSE	FALSE	TRUE	1
C4orf48	FALSE	FALSE	FALSE	FALSE	TRUE	FALSE	FALSE	FALSE	1
C5orf15	FALSE	FALSE	FALSE	FALSE	TRUE	FALSE	FALSE	FALSE	1
C5orf30	FALSE	FALSE	FALSE	FALSE	TRUE	FALSE	FALSE	FALSE	1
C6orf132	FALSE	FALSE	FALSE	FALSE	TRUE	FALSE	FALSE	FALSE	1
C7orf31	FALSE	FALSE	FALSE	FALSE	FALSE	FALSE	FALSE	TRUE	1
C8orf48	FALSE	FALSE	FALSE	FALSE	TRUE	FALSE	FALSE	FALSE	1
C9orf116	FALSE	FALSE	FALSE	FALSE	TRUE	FALSE	FALSE	FALSE	1
CAAP1	FALSE	FALSE	FALSE	TRUE	FALSE	FALSE	FALSE	FALSE	1
CACNB2	FALSE	FALSE	FALSE	FALSE	FALSE	FALSE	FALSE	TRUE	1
CACNG8	FALSE	FALSE	FALSE	FALSE	TRUE	FALSE	FALSE	FALSE	1
CACYBP	FALSE	FALSE	FALSE	FALSE	TRUE	FALSE	FALSE	FALSE	1
CALCOCO1	FALSE	TRUE	FALSE	FALSE	FALSE	FALSE	FALSE	FALSE	1
CALM1	FALSE	FALSE	FALSE	TRUE	FALSE	FALSE	FALSE	FALSE	1
CALM2	FALSE	FALSE	FALSE	FALSE	TRUE	FALSE	FALSE	FALSE	1
CAMK2D	FALSE	FALSE	FALSE	TRUE	FALSE	FALSE	FALSE	FALSE	1
CAMKK1	FALSE	FALSE	FALSE	FALSE	TRUE	FALSE	FALSE	FALSE	1
CANT1	FALSE	FALSE	FALSE	FALSE	TRUE	FALSE	FALSE	FALSE	1
CAPG	FALSE	FALSE	FALSE	FALSE	TRUE	FALSE	FALSE	FALSE	1
CAPRIN1	FALSE	FALSE	FALSE	FALSE	FALSE	FALSE	FALSE	TRUE	1
CAPS	FALSE	FALSE	FALSE	FALSE	FALSE	FALSE	FALSE	TRUE	1
CAPZA1	FALSE	FALSE	FALSE	TRUE	FALSE	FALSE	FALSE	FALSE	1
CARD10	FALSE	FALSE	FALSE	FALSE	TRUE	FALSE	FALSE	FALSE	1
CARD11	FALSE	FALSE	FALSE	TRUE	FALSE	FALSE	FALSE	FALSE	1
CARM1	FALSE	TRUE	FALSE	FALSE	FALSE	FALSE	FALSE	FALSE	1
CARS2	FALSE	FALSE	FALSE	FALSE	TRUE	FALSE	FALSE	FALSE	1
CAV1	FALSE	FALSE	FALSE	FALSE	TRUE	FALSE	FALSE	FALSE	1
CBARP	FALSE	FALSE	FALSE	FALSE	FALSE	FALSE	TRUE	FALSE	1
CBR3	FALSE	FALSE	FALSE	FALSE	TRUE	FALSE	FALSE	FALSE	1
CBX5	FALSE	FALSE	FALSE	TRUE	FALSE	FALSE	FALSE	FALSE	1
CBX6	FALSE	FALSE	FALSE	FALSE	TRUE	FALSE	FALSE	FALSE	1
CBY1	FALSE	FALSE	FALSE	FALSE	TRUE	FALSE	FALSE	FALSE	1
CCDC110	FALSE	FALSE	TRUE	FALSE	FALSE	FALSE	FALSE	FALSE	1
CCDC120	FALSE	FALSE	FALSE	FALSE	FALSE	FALSE	FALSE	TRUE	1
CCDC148	FALSE	FALSE	FALSE	FALSE	TRUE	FALSE	FALSE	FALSE	1
CCDC152	FALSE	FALSE	FALSE	FALSE	TRUE	FALSE	FALSE	FALSE	1
CCDC28B	FALSE	FALSE	FALSE	FALSE	TRUE	FALSE	FALSE	FALSE	1
CCDC86	FALSE	FALSE	FALSE	TRUE	FALSE	FALSE	FALSE	FALSE	1
CCL2	FALSE	FALSE	FALSE	FALSE	TRUE	FALSE	FALSE	FALSE	1
CCL26	FALSE	FALSE	FALSE	FALSE	TRUE	FALSE	FALSE	FALSE	1
CCNB1	FALSE	FALSE	FALSE	FALSE	TRUE	FALSE	FALSE	FALSE	1
CCNE2	FALSE	FALSE	FALSE	FALSE	TRUE	FALSE	FALSE	FALSE	1
CCNG1	FALSE	FALSE	FALSE	FALSE	FALSE	FALSE	FALSE	TRUE	1
CCSAP	FALSE	FALSE	FALSE	FALSE	FALSE	FALSE	FALSE	TRUE	1
CCT6A	FALSE	FALSE	FALSE	FALSE	TRUE	FALSE	FALSE	FALSE	1
CCT8	FALSE	FALSE	FALSE	FALSE	TRUE	FALSE	FALSE	FALSE	1
CD164	FALSE	FALSE	FALSE	FALSE	TRUE	FALSE	FALSE	FALSE	1
CD55	FALSE	FALSE	FALSE	FALSE	TRUE	FALSE	FALSE	FALSE	1
CD74	FALSE	FALSE	FALSE	FALSE	FALSE	FALSE	FALSE	TRUE	1
CD82	FALSE	FALSE	FALSE	FALSE	TRUE	FALSE	FALSE	FALSE	1
CD9	FALSE	FALSE	FALSE	FALSE	TRUE	FALSE	FALSE	FALSE	1
CDC42	FALSE	FALSE	FALSE	FALSE	TRUE	FALSE	FALSE	FALSE	1
CDC45	FALSE	FALSE	FALSE	FALSE	TRUE	FALSE	FALSE	FALSE	1
CDCP1	FALSE	FALSE	FALSE	FALSE	TRUE	FALSE	FALSE	FALSE	1
CDH15	FALSE	TRUE	FALSE	FALSE	FALSE	FALSE	FALSE	FALSE	1
CDK10	FALSE	TRUE	FALSE	FALSE	FALSE	FALSE	FALSE	FALSE	1
CDK13	FALSE	FALSE	FALSE	TRUE	FALSE	FALSE	FALSE	FALSE	1
CDK19	FALSE	FALSE	FALSE	FALSE	TRUE	FALSE	FALSE	FALSE	1
CDK2AP2	FALSE	FALSE	FALSE	FALSE	TRUE	FALSE	FALSE	FALSE	1
CDPF1	FALSE	FALSE	FALSE	FALSE	TRUE	FALSE	FALSE	FALSE	1
CEBPB	FALSE	TRUE	FALSE	FALSE	FALSE	FALSE	FALSE	FALSE	1
CEBPZ	FALSE	FALSE	TRUE	FALSE	FALSE	FALSE	FALSE	FALSE	1
CELF2	FALSE	FALSE	FALSE	TRUE	FALSE	FALSE	FALSE	FALSE	1
CENPB	FALSE	FALSE	FALSE	FALSE	TRUE	FALSE	FALSE	FALSE	1
CENPH	FALSE	FALSE	FALSE	FALSE	TRUE	FALSE	FALSE	FALSE	1
CENPJ	FALSE	FALSE	TRUE	FALSE	FALSE	FALSE	FALSE	FALSE	1
CENPK	FALSE	FALSE	FALSE	FALSE	TRUE	FALSE	FALSE	FALSE	1
CENPS	FALSE	FALSE	FALSE	FALSE	FALSE	FALSE	FALSE	TRUE	1
CENPU	FALSE	FALSE	FALSE	FALSE	TRUE	FALSE	FALSE	FALSE	1
CENPV	FALSE	FALSE	FALSE	TRUE	FALSE	FALSE	FALSE	FALSE	1
CEP290	FALSE	FALSE	FALSE	TRUE	FALSE	FALSE	FALSE	FALSE	1
CEP55	FALSE	FALSE	FALSE	TRUE	FALSE	FALSE	FALSE	FALSE	1
CERK	FALSE	FALSE	FALSE	FALSE	TRUE	FALSE	FALSE	FALSE	1
CFB	FALSE	FALSE	FALSE	FALSE	FALSE	FALSE	FALSE	TRUE	1
CFL1	FALSE	FALSE	FALSE	FALSE	TRUE	FALSE	FALSE	FALSE	1
CFL2	FALSE	FALSE	FALSE	FALSE	TRUE	FALSE	FALSE	FALSE	1
CGREF1	FALSE	FALSE	FALSE	FALSE	TRUE	FALSE	FALSE	FALSE	1
CHCHD3	FALSE	FALSE	FALSE	TRUE	FALSE	FALSE	FALSE	FALSE	1
CHCHD5	FALSE	FALSE	FALSE	FALSE	TRUE	FALSE	FALSE	FALSE	1
CHD3	FALSE	FALSE	FALSE	FALSE	TRUE	FALSE	FALSE	FALSE	1
CHD4	FALSE	FALSE	TRUE	FALSE	FALSE	FALSE	FALSE	FALSE	1
CHMP4A	FALSE	FALSE	FALSE	FALSE	FALSE	FALSE	FALSE	TRUE	1
CHMP4C	FALSE	FALSE	FALSE	FALSE	TRUE	FALSE	FALSE	FALSE	1
CHPF	FALSE	FALSE	FALSE	FALSE	FALSE	FALSE	FALSE	TRUE	1
CHPF2	FALSE	FALSE	FALSE	FALSE	TRUE	FALSE	FALSE	FALSE	1
CHRNA6	FALSE	FALSE	FALSE	FALSE	TRUE	FALSE	FALSE	FALSE	1
CHRNB1	FALSE	FALSE	FALSE	FALSE	TRUE	FALSE	FALSE	FALSE	1
CHTOP	FALSE	FALSE	FALSE	TRUE	FALSE	FALSE	FALSE	FALSE	1
CIRBP	FALSE	FALSE	FALSE	FALSE	FALSE	FALSE	TRUE	FALSE	1
CIZ1	FALSE	TRUE	FALSE	FALSE	FALSE	FALSE	FALSE	FALSE	1
CKAP2	FALSE	TRUE	FALSE	FALSE	FALSE	FALSE	FALSE	FALSE	1
CKAP5	FALSE	FALSE	FALSE	TRUE	FALSE	FALSE	FALSE	FALSE	1
CLCN7	FALSE	FALSE	FALSE	FALSE	TRUE	FALSE	FALSE	FALSE	1
CLDN11	FALSE	FALSE	FALSE	FALSE	TRUE	FALSE	FALSE	FALSE	1
CLDN24	FALSE	FALSE	FALSE	FALSE	FALSE	FALSE	FALSE	TRUE	1
CLEC11A	FALSE	FALSE	FALSE	FALSE	TRUE	FALSE	FALSE	FALSE	1
CLN6	FALSE	FALSE	FALSE	FALSE	TRUE	FALSE	FALSE	FALSE	1
CLNS1A	FALSE	FALSE	FALSE	FALSE	TRUE	FALSE	FALSE	FALSE	1
CLTC	FALSE	FALSE	TRUE	FALSE	FALSE	FALSE	FALSE	FALSE	1
CLU	FALSE	FALSE	FALSE	FALSE	TRUE	FALSE	FALSE	FALSE	1
CMAS	FALSE	FALSE	FALSE	TRUE	FALSE	FALSE	FALSE	FALSE	1
CMSS1	FALSE	FALSE	FALSE	TRUE	FALSE	FALSE	FALSE	FALSE	1
CMTM6	FALSE	FALSE	FALSE	FALSE	TRUE	FALSE	FALSE	FALSE	1
CNIH1	FALSE	FALSE	FALSE	FALSE	TRUE	FALSE	FALSE	FALSE	1
CNIH2	FALSE	FALSE	FALSE	FALSE	FALSE	FALSE	FALSE	TRUE	1
CNNM3	FALSE	FALSE	FALSE	FALSE	FALSE	FALSE	FALSE	TRUE	1
CNPY2	FALSE	FALSE	FALSE	FALSE	FALSE	FALSE	FALSE	TRUE	1
COBLL1	FALSE	FALSE	FALSE	FALSE	TRUE	FALSE	FALSE	FALSE	1
COL13A1	FALSE	FALSE	FALSE	FALSE	TRUE	FALSE	FALSE	FALSE	1
COL1A1	FALSE	FALSE	FALSE	FALSE	TRUE	FALSE	FALSE	FALSE	1
COL4A3BP	FALSE	TRUE	FALSE	FALSE	FALSE	FALSE	FALSE	FALSE	1
COL6A2	FALSE	FALSE	FALSE	FALSE	TRUE	FALSE	FALSE	FALSE	1
COL7A1	FALSE	FALSE	FALSE	FALSE	TRUE	FALSE	FALSE	FALSE	1
COL8A1	FALSE	FALSE	FALSE	FALSE	TRUE	FALSE	FALSE	FALSE	1
COLGALT1	FALSE	FALSE	FALSE	FALSE	TRUE	FALSE	FALSE	FALSE	1
COLGALT2	FALSE	FALSE	FALSE	FALSE	FALSE	FALSE	FALSE	TRUE	1
COMMD1	FALSE	FALSE	FALSE	FALSE	TRUE	FALSE	FALSE	FALSE	1
COMMD10	FALSE	FALSE	FALSE	FALSE	TRUE	FALSE	FALSE	FALSE	1
COMMD2	FALSE	FALSE	FALSE	FALSE	TRUE	FALSE	FALSE	FALSE	1
COMMD3	FALSE	FALSE	FALSE	FALSE	FALSE	FALSE	FALSE	TRUE	1
COMMD6	FALSE	FALSE	FALSE	FALSE	TRUE	FALSE	FALSE	FALSE	1
COPS3	FALSE	FALSE	FALSE	TRUE	FALSE	FALSE	FALSE	FALSE	1
COPS4	FALSE	FALSE	FALSE	FALSE	TRUE	FALSE	FALSE	FALSE	1
COPS5	FALSE	FALSE	FALSE	FALSE	TRUE	FALSE	FALSE	FALSE	1
COQ10A	FALSE	FALSE	FALSE	FALSE	FALSE	FALSE	FALSE	TRUE	1
CORO1B	FALSE	FALSE	FALSE	FALSE	FALSE	FALSE	FALSE	TRUE	1
CORT	FALSE	FALSE	FALSE	FALSE	FALSE	FALSE	FALSE	TRUE	1
COX11	FALSE	FALSE	FALSE	FALSE	TRUE	FALSE	FALSE	FALSE	1
COX6B1	FALSE	FALSE	FALSE	FALSE	TRUE	FALSE	FALSE	FALSE	1
COX6B2	FALSE	FALSE	FALSE	FALSE	FALSE	FALSE	FALSE	TRUE	1
CPA4	FALSE	FALSE	FALSE	FALSE	TRUE	FALSE	FALSE	FALSE	1
CPE	FALSE	FALSE	FALSE	FALSE	TRUE	FALSE	FALSE	FALSE	1
CPN1	FALSE	FALSE	FALSE	FALSE	TRUE	FALSE	FALSE	FALSE	1
CPNE1	FALSE	FALSE	FALSE	FALSE	TRUE	FALSE	FALSE	FALSE	1
CPNE7	FALSE	FALSE	FALSE	FALSE	TRUE	FALSE	FALSE	FALSE	1
CPSF1	FALSE	FALSE	FALSE	FALSE	TRUE	FALSE	FALSE	FALSE	1
CRABP2	FALSE	FALSE	FALSE	FALSE	TRUE	FALSE	FALSE	FALSE	1
CRAT	FALSE	FALSE	FALSE	FALSE	TRUE	FALSE	FALSE	FALSE	1
CREB3L2	FALSE	FALSE	FALSE	FALSE	TRUE	FALSE	FALSE	FALSE	1
CREBZF	FALSE	FALSE	FALSE	FALSE	FALSE	FALSE	FALSE	TRUE	1
CREG1	FALSE	FALSE	FALSE	FALSE	TRUE	FALSE	FALSE	FALSE	1
CRIP2	FALSE	FALSE	FALSE	FALSE	TRUE	FALSE	FALSE	FALSE	1
CRISPLD2	FALSE	FALSE	FALSE	FALSE	TRUE	FALSE	FALSE	FALSE	1
CRKL	FALSE	FALSE	FALSE	FALSE	TRUE	FALSE	FALSE	FALSE	1
CRYBA1	FALSE	FALSE	FALSE	FALSE	FALSE	FALSE	FALSE	TRUE	1
CRYZL1	FALSE	FALSE	FALSE	FALSE	TRUE	FALSE	FALSE	FALSE	1
CSAG1	FALSE	FALSE	FALSE	FALSE	TRUE	FALSE	FALSE	FALSE	1
CSF1	FALSE	FALSE	FALSE	FALSE	TRUE	FALSE	FALSE	FALSE	1
CSNK1E	FALSE	FALSE	FALSE	FALSE	TRUE	FALSE	FALSE	FALSE	1
CSNK2A1	FALSE	TRUE	FALSE	FALSE	FALSE	FALSE	FALSE	FALSE	1
CSRP2	FALSE	FALSE	FALSE	FALSE	TRUE	FALSE	FALSE	FALSE	1
CTCF	FALSE	FALSE	TRUE	FALSE	FALSE	FALSE	FALSE	FALSE	1
CTGF	FALSE	FALSE	FALSE	FALSE	TRUE	FALSE	FALSE	FALSE	1
CTHRC1	FALSE	FALSE	FALSE	FALSE	TRUE	FALSE	FALSE	FALSE	1
CTNNA1	FALSE	TRUE	FALSE	FALSE	FALSE	FALSE	FALSE	FALSE	1
CTSD	FALSE	FALSE	FALSE	FALSE	TRUE	FALSE	FALSE	FALSE	1
CTSV	FALSE	FALSE	FALSE	FALSE	TRUE	FALSE	FALSE	FALSE	1
CTTN	FALSE	FALSE	FALSE	FALSE	TRUE	FALSE	FALSE	FALSE	1
CXCL16	FALSE	FALSE	FALSE	FALSE	TRUE	FALSE	FALSE	FALSE	1
CXCL17	FALSE	FALSE	FALSE	FALSE	FALSE	FALSE	FALSE	TRUE	1
CYB561	FALSE	FALSE	FALSE	FALSE	FALSE	FALSE	FALSE	TRUE	1
CYB561A3	FALSE	FALSE	FALSE	FALSE	FALSE	FALSE	FALSE	TRUE	1
CYB5R3	FALSE	FALSE	FALSE	FALSE	TRUE	FALSE	FALSE	FALSE	1
CYB5RL	FALSE	FALSE	FALSE	FALSE	TRUE	FALSE	FALSE	FALSE	1
CYBC1	FALSE	FALSE	FALSE	FALSE	FALSE	FALSE	FALSE	TRUE	1
CYCS	FALSE	FALSE	FALSE	FALSE	TRUE	FALSE	FALSE	FALSE	1
CYP3A5	FALSE	FALSE	FALSE	FALSE	FALSE	FALSE	FALSE	TRUE	1
CYR61	FALSE	FALSE	FALSE	FALSE	TRUE	FALSE	FALSE	FALSE	1
CYSTM1	FALSE	FALSE	FALSE	FALSE	TRUE	FALSE	FALSE	FALSE	1
CYTL1	FALSE	FALSE	FALSE	FALSE	TRUE	FALSE	FALSE	FALSE	1
DAAM2	FALSE	FALSE	FALSE	FALSE	FALSE	FALSE	FALSE	TRUE	1
DALRD3	FALSE	FALSE	FALSE	FALSE	FALSE	FALSE	FALSE	TRUE	1
DAPK3	FALSE	FALSE	FALSE	TRUE	FALSE	FALSE	FALSE	FALSE	1
DAZAP2	FALSE	FALSE	FALSE	FALSE	FALSE	FALSE	FALSE	TRUE	1
DBN1	FALSE	FALSE	TRUE	FALSE	FALSE	FALSE	FALSE	FALSE	1
DBNL	FALSE	FALSE	FALSE	FALSE	TRUE	FALSE	FALSE	FALSE	1
DCAF13	FALSE	FALSE	FALSE	FALSE	TRUE	FALSE	FALSE	FALSE	1
DCD	FALSE	FALSE	FALSE	TRUE	FALSE	FALSE	FALSE	FALSE	1
DCK	FALSE	FALSE	FALSE	FALSE	TRUE	FALSE	FALSE	FALSE	1
DCLRE1C	FALSE	FALSE	FALSE	FALSE	FALSE	FALSE	FALSE	TRUE	1
DCPS	FALSE	FALSE	FALSE	FALSE	FALSE	FALSE	FALSE	TRUE	1
DCST1	FALSE	FALSE	FALSE	FALSE	FALSE	FALSE	FALSE	TRUE	1
DCUN1D5	FALSE	FALSE	FALSE	FALSE	TRUE	FALSE	FALSE	FALSE	1
DDAH1	FALSE	FALSE	FALSE	FALSE	TRUE	FALSE	FALSE	FALSE	1
DDB2	FALSE	FALSE	FALSE	FALSE	TRUE	FALSE	FALSE	FALSE	1
DDX1	FALSE	FALSE	TRUE	FALSE	FALSE	FALSE	FALSE	FALSE	1
DDX10	FALSE	FALSE	FALSE	FALSE	TRUE	FALSE	FALSE	FALSE	1
DDX11	FALSE	FALSE	FALSE	FALSE	TRUE	FALSE	FALSE	FALSE	1
DDX23	FALSE	FALSE	TRUE	FALSE	FALSE	FALSE	FALSE	FALSE	1
DDX24	FALSE	FALSE	TRUE	FALSE	FALSE	FALSE	FALSE	FALSE	1
DDX27	FALSE	FALSE	TRUE	FALSE	FALSE	FALSE	FALSE	FALSE	1
DDX41	FALSE	FALSE	FALSE	TRUE	FALSE	FALSE	FALSE	FALSE	1
DDX51	FALSE	FALSE	TRUE	FALSE	FALSE	FALSE	FALSE	FALSE	1
DDX55	FALSE	FALSE	FALSE	FALSE	FALSE	FALSE	FALSE	TRUE	1
DDX6	FALSE	FALSE	FALSE	TRUE	FALSE	FALSE	FALSE	FALSE	1
DENND1A	FALSE	FALSE	FALSE	FALSE	TRUE	FALSE	FALSE	FALSE	1
DENND3	FALSE	FALSE	FALSE	FALSE	TRUE	FALSE	FALSE	FALSE	1
DERL2	FALSE	FALSE	FALSE	FALSE	TRUE	FALSE	FALSE	FALSE	1
DESI1	FALSE	FALSE	FALSE	FALSE	TRUE	FALSE	FALSE	FALSE	1
DGCR2	FALSE	FALSE	FALSE	FALSE	TRUE	FALSE	FALSE	FALSE	1
DGCR6	FALSE	TRUE	FALSE	FALSE	FALSE	FALSE	FALSE	FALSE	1
DGCR6L	FALSE	FALSE	FALSE	FALSE	TRUE	FALSE	FALSE	FALSE	1
DGCR8	FALSE	FALSE	FALSE	FALSE	TRUE	FALSE	FALSE	FALSE	1
DGKD	FALSE	FALSE	FALSE	TRUE	FALSE	FALSE	FALSE	FALSE	1
DHDDS	FALSE	FALSE	FALSE	FALSE	FALSE	FALSE	FALSE	TRUE	1
DHX29	FALSE	FALSE	FALSE	FALSE	TRUE	FALSE	FALSE	FALSE	1
DHX30	FALSE	FALSE	TRUE	FALSE	FALSE	FALSE	FALSE	FALSE	1
DHX32	FALSE	FALSE	FALSE	FALSE	FALSE	FALSE	TRUE	FALSE	1
DHX9	FALSE	FALSE	TRUE	FALSE	FALSE	FALSE	FALSE	FALSE	1
DIMT1	FALSE	FALSE	FALSE	FALSE	TRUE	FALSE	FALSE	FALSE	1
DIS3	FALSE	FALSE	FALSE	FALSE	TRUE	FALSE	FALSE	FALSE	1
DKK2	FALSE	FALSE	FALSE	FALSE	TRUE	FALSE	FALSE	FALSE	1
DLG1	FALSE	FALSE	FALSE	FALSE	TRUE	FALSE	FALSE	FALSE	1
DLG3	FALSE	FALSE	FALSE	FALSE	TRUE	FALSE	FALSE	FALSE	1
DLK2	FALSE	FALSE	FALSE	FALSE	TRUE	FALSE	FALSE	FALSE	1
DLL3	FALSE	FALSE	FALSE	FALSE	TRUE	FALSE	FALSE	FALSE	1
DMKN	FALSE	FALSE	FALSE	FALSE	TRUE	FALSE	FALSE	FALSE	1
DNAH10	FALSE	FALSE	FALSE	TRUE	FALSE	FALSE	FALSE	FALSE	1
DNAH11	FALSE	FALSE	FALSE	FALSE	FALSE	FALSE	FALSE	TRUE	1
DNAH14	FALSE	FALSE	FALSE	FALSE	TRUE	FALSE	FALSE	FALSE	1
DNAJA1	FALSE	FALSE	FALSE	TRUE	FALSE	FALSE	FALSE	FALSE	1
DNAJB11	FALSE	FALSE	FALSE	FALSE	TRUE	FALSE	FALSE	FALSE	1
DNAJC10	FALSE	FALSE	TRUE	FALSE	FALSE	FALSE	FALSE	FALSE	1
DNAJC18	FALSE	FALSE	FALSE	FALSE	TRUE	FALSE	FALSE	FALSE	1
DNAJC6	FALSE	FALSE	FALSE	FALSE	TRUE	FALSE	FALSE	FALSE	1
DNAJC7	FALSE	FALSE	FALSE	FALSE	FALSE	FALSE	FALSE	TRUE	1
DNAL4	FALSE	FALSE	FALSE	FALSE	TRUE	FALSE	FALSE	FALSE	1
DNM2	FALSE	FALSE	FALSE	FALSE	FALSE	FALSE	FALSE	TRUE	1
DOCK10	FALSE	FALSE	FALSE	FALSE	TRUE	FALSE	FALSE	FALSE	1
DOK1	FALSE	FALSE	FALSE	FALSE	TRUE	FALSE	FALSE	FALSE	1
DOPEY1	FALSE	FALSE	FALSE	FALSE	TRUE	FALSE	FALSE	FALSE	1
DOT1L	FALSE	FALSE	FALSE	FALSE	TRUE	FALSE	FALSE	FALSE	1
DPY30	FALSE	FALSE	FALSE	FALSE	TRUE	FALSE	FALSE	FALSE	1
DPYSL4	FALSE	FALSE	FALSE	FALSE	TRUE	FALSE	FALSE	FALSE	1
DST	FALSE	FALSE	FALSE	FALSE	TRUE	FALSE	FALSE	FALSE	1
DSTN	FALSE	FALSE	FALSE	FALSE	TRUE	FALSE	FALSE	FALSE	1
DTD1	FALSE	FALSE	FALSE	FALSE	TRUE	FALSE	FALSE	FALSE	1
DTNBP1	FALSE	FALSE	FALSE	FALSE	TRUE	FALSE	FALSE	FALSE	1
DTX3L	FALSE	FALSE	FALSE	FALSE	FALSE	FALSE	FALSE	TRUE	1
DUS1L	FALSE	FALSE	FALSE	FALSE	TRUE	FALSE	FALSE	FALSE	1
DUSP1	FALSE	FALSE	FALSE	FALSE	TRUE	FALSE	FALSE	FALSE	1
DUSP18	FALSE	FALSE	FALSE	FALSE	TRUE	FALSE	FALSE	FALSE	1
DUSP9	FALSE	FALSE	FALSE	FALSE	TRUE	FALSE	FALSE	FALSE	1
DVL1	FALSE	FALSE	FALSE	FALSE	TRUE	FALSE	FALSE	FALSE	1
DYNC2LI1	FALSE	FALSE	FALSE	FALSE	TRUE	FALSE	FALSE	FALSE	1
DYNLL1	FALSE	FALSE	FALSE	TRUE	FALSE	FALSE	FALSE	FALSE	1
DYNLL2	FALSE	FALSE	FALSE	TRUE	FALSE	FALSE	FALSE	FALSE	1
DYRK4	FALSE	FALSE	FALSE	FALSE	TRUE	FALSE	FALSE	FALSE	1
DZIP1	FALSE	FALSE	FALSE	FALSE	TRUE	FALSE	FALSE	FALSE	1
EAPP	FALSE	FALSE	FALSE	FALSE	TRUE	FALSE	FALSE	FALSE	1
EBNA1BP2	FALSE	FALSE	FALSE	TRUE	FALSE	FALSE	FALSE	FALSE	1
ECE1	FALSE	FALSE	FALSE	FALSE	TRUE	FALSE	FALSE	FALSE	1
ECHDC2	FALSE	FALSE	FALSE	FALSE	FALSE	FALSE	FALSE	TRUE	1
ECSIT	FALSE	FALSE	FALSE	FALSE	FALSE	FALSE	FALSE	TRUE	1
ECT2L	FALSE	FALSE	FALSE	FALSE	FALSE	FALSE	FALSE	TRUE	1
EDN1	FALSE	FALSE	FALSE	FALSE	TRUE	FALSE	FALSE	FALSE	1
EEF1A1	FALSE	FALSE	FALSE	TRUE	FALSE	FALSE	FALSE	FALSE	1
EEF1A2	FALSE	FALSE	FALSE	FALSE	TRUE	FALSE	FALSE	FALSE	1
EEF2	FALSE	FALSE	FALSE	FALSE	TRUE	FALSE	FALSE	FALSE	1
EFEMP1	FALSE	FALSE	FALSE	FALSE	TRUE	FALSE	FALSE	FALSE	1
EFHD2	FALSE	FALSE	FALSE	FALSE	TRUE	FALSE	FALSE	FALSE	1
EFNA1	FALSE	FALSE	FALSE	FALSE	FALSE	FALSE	FALSE	TRUE	1
EFS	FALSE	FALSE	FALSE	FALSE	TRUE	FALSE	FALSE	FALSE	1
EFTUD2	FALSE	FALSE	TRUE	FALSE	FALSE	FALSE	FALSE	FALSE	1
EGFL7	FALSE	FALSE	FALSE	FALSE	TRUE	FALSE	FALSE	FALSE	1
EHD4	FALSE	FALSE	FALSE	FALSE	TRUE	FALSE	FALSE	FALSE	1
EID2	FALSE	FALSE	FALSE	FALSE	TRUE	FALSE	FALSE	FALSE	1
EIF2A	FALSE	FALSE	FALSE	FALSE	FALSE	FALSE	FALSE	TRUE	1
EIF2AK4	FALSE	FALSE	FALSE	FALSE	FALSE	FALSE	FALSE	TRUE	1
EIF2B2	FALSE	FALSE	FALSE	TRUE	FALSE	FALSE	FALSE	FALSE	1
EIF2B4	FALSE	FALSE	FALSE	FALSE	FALSE	FALSE	FALSE	TRUE	1
EIF2B5	FALSE	FALSE	FALSE	FALSE	FALSE	FALSE	FALSE	TRUE	1
EIF2S1	FALSE	FALSE	FALSE	FALSE	TRUE	FALSE	FALSE	FALSE	1
EIF3A	FALSE	FALSE	FALSE	TRUE	FALSE	FALSE	FALSE	FALSE	1
EIF3K	FALSE	FALSE	FALSE	FALSE	TRUE	FALSE	FALSE	FALSE	1
EIF3L	FALSE	FALSE	FALSE	FALSE	TRUE	FALSE	FALSE	FALSE	1
EIF4A1	FALSE	FALSE	FALSE	FALSE	FALSE	FALSE	FALSE	TRUE	1
EIF6	FALSE	FALSE	FALSE	TRUE	FALSE	FALSE	FALSE	FALSE	1
ELMO2	FALSE	FALSE	FALSE	TRUE	FALSE	FALSE	FALSE	FALSE	1
ELMOD3	FALSE	TRUE	FALSE	FALSE	FALSE	FALSE	FALSE	FALSE	1
ELOVL5	FALSE	FALSE	FALSE	FALSE	FALSE	FALSE	TRUE	FALSE	1
EMB	FALSE	FALSE	FALSE	FALSE	TRUE	FALSE	FALSE	FALSE	1
EMC1	FALSE	FALSE	FALSE	FALSE	FALSE	FALSE	FALSE	TRUE	1
EMD	FALSE	FALSE	FALSE	TRUE	FALSE	FALSE	FALSE	FALSE	1
EMP1	FALSE	FALSE	FALSE	FALSE	TRUE	FALSE	FALSE	FALSE	1
EMP3	FALSE	FALSE	FALSE	FALSE	TRUE	FALSE	FALSE	FALSE	1
EMX1	FALSE	FALSE	FALSE	FALSE	FALSE	FALSE	FALSE	TRUE	1
ENAH	FALSE	FALSE	FALSE	FALSE	FALSE	FALSE	FALSE	TRUE	1
ENDOD1	FALSE	FALSE	FALSE	FALSE	TRUE	FALSE	FALSE	FALSE	1
ENDOU	FALSE	FALSE	FALSE	FALSE	FALSE	FALSE	FALSE	TRUE	1
ENG	FALSE	FALSE	FALSE	FALSE	TRUE	FALSE	FALSE	FALSE	1
ENO1	FALSE	FALSE	FALSE	FALSE	FALSE	FALSE	FALSE	TRUE	1
ENO2	FALSE	FALSE	FALSE	FALSE	TRUE	FALSE	FALSE	FALSE	1
ENTPD6	FALSE	FALSE	FALSE	FALSE	TRUE	FALSE	FALSE	FALSE	1
EPB41L2	FALSE	FALSE	FALSE	FALSE	TRUE	FALSE	FALSE	FALSE	1
EPN2	FALSE	FALSE	FALSE	FALSE	TRUE	FALSE	FALSE	FALSE	1
EPS8L1	FALSE	FALSE	FALSE	FALSE	FALSE	FALSE	FALSE	TRUE	1
EPS8L2	FALSE	FALSE	FALSE	FALSE	TRUE	FALSE	FALSE	FALSE	1
ERAP2	FALSE	FALSE	FALSE	FALSE	FALSE	FALSE	FALSE	TRUE	1
ERBB3	FALSE	FALSE	FALSE	FALSE	FALSE	FALSE	FALSE	TRUE	1
ERC1	FALSE	FALSE	FALSE	FALSE	FALSE	FALSE	FALSE	TRUE	1
ERH	FALSE	FALSE	FALSE	TRUE	FALSE	FALSE	FALSE	FALSE	1
ESYT2	FALSE	FALSE	FALSE	FALSE	TRUE	FALSE	FALSE	FALSE	1
ETFA	FALSE	FALSE	FALSE	FALSE	TRUE	FALSE	FALSE	FALSE	1
ETNK2	FALSE	FALSE	FALSE	FALSE	TRUE	FALSE	FALSE	FALSE	1
EVC	FALSE	FALSE	FALSE	FALSE	TRUE	FALSE	FALSE	FALSE	1
EWSR1	FALSE	FALSE	TRUE	FALSE	FALSE	FALSE	FALSE	FALSE	1
EXOSC7	FALSE	FALSE	FALSE	FALSE	TRUE	FALSE	FALSE	FALSE	1
EYA2	FALSE	FALSE	FALSE	FALSE	FALSE	FALSE	TRUE	FALSE	1
F12	FALSE	FALSE	FALSE	FALSE	TRUE	FALSE	FALSE	FALSE	1
F2R	FALSE	FALSE	FALSE	FALSE	TRUE	FALSE	FALSE	FALSE	1
F2RL1	FALSE	FALSE	FALSE	FALSE	TRUE	FALSE	FALSE	FALSE	1
FAHD2A	FALSE	FALSE	FALSE	FALSE	FALSE	FALSE	FALSE	TRUE	1
FAIM	FALSE	FALSE	FALSE	FALSE	FALSE	FALSE	FALSE	TRUE	1
FAM102A	FALSE	FALSE	FALSE	FALSE	TRUE	FALSE	FALSE	FALSE	1
FAM107A	FALSE	FALSE	FALSE	FALSE	FALSE	FALSE	FALSE	TRUE	1
FAM111B	FALSE	FALSE	FALSE	FALSE	FALSE	FALSE	FALSE	TRUE	1
FAM120A	FALSE	FALSE	FALSE	FALSE	TRUE	FALSE	FALSE	FALSE	1
FAM126A	FALSE	FALSE	FALSE	FALSE	TRUE	FALSE	FALSE	FALSE	1
FAM129B	FALSE	FALSE	FALSE	FALSE	TRUE	FALSE	FALSE	FALSE	1
FAM131A	FALSE	FALSE	FALSE	FALSE	FALSE	FALSE	FALSE	TRUE	1
FAM161B	FALSE	FALSE	FALSE	FALSE	FALSE	FALSE	FALSE	TRUE	1
FAM169A	FALSE	FALSE	FALSE	FALSE	TRUE	FALSE	FALSE	FALSE	1
FAM174B	FALSE	FALSE	FALSE	FALSE	FALSE	FALSE	FALSE	TRUE	1
FAM200B	FALSE	FALSE	FALSE	FALSE	FALSE	FALSE	FALSE	TRUE	1
FAM207A	FALSE	FALSE	FALSE	FALSE	TRUE	FALSE	FALSE	FALSE	1
FAM20A	FALSE	FALSE	FALSE	FALSE	FALSE	FALSE	FALSE	TRUE	1
FAM20C	FALSE	FALSE	FALSE	FALSE	TRUE	FALSE	FALSE	FALSE	1
FAM219B	FALSE	FALSE	FALSE	FALSE	TRUE	FALSE	FALSE	FALSE	1
FAM89A	FALSE	FALSE	FALSE	FALSE	TRUE	FALSE	FALSE	FALSE	1
FAM98A	FALSE	FALSE	FALSE	TRUE	FALSE	FALSE	FALSE	FALSE	1
FANCA	FALSE	FALSE	FALSE	FALSE	TRUE	FALSE	FALSE	FALSE	1
FANCF	FALSE	FALSE	FALSE	FALSE	TRUE	FALSE	FALSE	FALSE	1
FANCG	FALSE	FALSE	FALSE	FALSE	TRUE	FALSE	FALSE	FALSE	1
FAU	FALSE	FALSE	FALSE	TRUE	FALSE	FALSE	FALSE	FALSE	1
FBL	FALSE	FALSE	FALSE	TRUE	FALSE	FALSE	FALSE	FALSE	1
FBLN2	FALSE	FALSE	FALSE	FALSE	TRUE	FALSE	FALSE	FALSE	1
FBN2	FALSE	FALSE	FALSE	FALSE	TRUE	FALSE	FALSE	FALSE	1
FBXL22	FALSE	FALSE	FALSE	FALSE	FALSE	FALSE	FALSE	TRUE	1
FBXO10	FALSE	FALSE	FALSE	FALSE	FALSE	FALSE	FALSE	TRUE	1
FBXO16	FALSE	FALSE	FALSE	FALSE	TRUE	FALSE	FALSE	FALSE	1
FBXO25	FALSE	FALSE	FALSE	FALSE	FALSE	FALSE	FALSE	TRUE	1
FCGRT	FALSE	FALSE	FALSE	FALSE	TRUE	FALSE	FALSE	FALSE	1
FDXR	FALSE	FALSE	FALSE	TRUE	FALSE	FALSE	FALSE	FALSE	1
FGF7	FALSE	FALSE	FALSE	FALSE	FALSE	FALSE	FALSE	TRUE	1
FH	FALSE	FALSE	FALSE	FALSE	TRUE	FALSE	FALSE	FALSE	1
FHL1	FALSE	FALSE	FALSE	TRUE	FALSE	FALSE	FALSE	FALSE	1
FHOD3	FALSE	FALSE	FALSE	FALSE	TRUE	FALSE	FALSE	FALSE	1
FIBCD1	FALSE	FALSE	FALSE	FALSE	TRUE	FALSE	FALSE	FALSE	1
FIBP	FALSE	TRUE	FALSE	FALSE	FALSE	FALSE	FALSE	FALSE	1
FILIP1L	FALSE	FALSE	FALSE	FALSE	FALSE	FALSE	FALSE	TRUE	1
FKBP9	FALSE	FALSE	FALSE	FALSE	FALSE	FALSE	FALSE	TRUE	1
FKRP	FALSE	FALSE	FALSE	FALSE	FALSE	FALSE	FALSE	TRUE	1
FLNC	FALSE	FALSE	FALSE	FALSE	FALSE	FALSE	FALSE	TRUE	1
FMNL2	FALSE	FALSE	FALSE	FALSE	FALSE	FALSE	TRUE	FALSE	1
FOS	FALSE	FALSE	FALSE	FALSE	FALSE	TRUE	FALSE	FALSE	1
FOSB	FALSE	FALSE	FALSE	FALSE	FALSE	FALSE	FALSE	TRUE	1
FOXM1	FALSE	FALSE	FALSE	FALSE	TRUE	FALSE	FALSE	FALSE	1
FOXRED2	FALSE	FALSE	FALSE	FALSE	TRUE	FALSE	FALSE	FALSE	1
FOXS1	FALSE	FALSE	FALSE	FALSE	TRUE	FALSE	FALSE	FALSE	1
FRMD4A	FALSE	FALSE	FALSE	FALSE	FALSE	FALSE	FALSE	TRUE	1
FRMD6	FALSE	FALSE	FALSE	FALSE	TRUE	FALSE	FALSE	FALSE	1
FSTL1	FALSE	FALSE	FALSE	FALSE	TRUE	FALSE	FALSE	FALSE	1
FSTL3	FALSE	FALSE	FALSE	FALSE	TRUE	FALSE	FALSE	FALSE	1
FTH1	FALSE	FALSE	FALSE	FALSE	TRUE	FALSE	FALSE	FALSE	1
FTL	FALSE	FALSE	FALSE	FALSE	TRUE	FALSE	FALSE	FALSE	1
FTSJ3	FALSE	FALSE	TRUE	FALSE	FALSE	FALSE	FALSE	FALSE	1
FUS	FALSE	FALSE	TRUE	FALSE	FALSE	FALSE	FALSE	FALSE	1
FXR2	FALSE	FALSE	FALSE	TRUE	FALSE	FALSE	FALSE	FALSE	1
FYB2	FALSE	FALSE	FALSE	FALSE	FALSE	FALSE	FALSE	TRUE	1
FYTTD1	FALSE	FALSE	FALSE	TRUE	FALSE	FALSE	FALSE	FALSE	1
FZD6	FALSE	FALSE	FALSE	FALSE	FALSE	FALSE	FALSE	TRUE	1
G0S2	FALSE	FALSE	FALSE	FALSE	TRUE	FALSE	FALSE	FALSE	1
G6PD	FALSE	FALSE	FALSE	FALSE	TRUE	FALSE	FALSE	FALSE	1
GABARAPL2	FALSE	FALSE	FALSE	FALSE	FALSE	FALSE	FALSE	TRUE	1
GABBR1	FALSE	FALSE	FALSE	FALSE	TRUE	FALSE	FALSE	FALSE	1
GABRE	FALSE	FALSE	FALSE	FALSE	TRUE	FALSE	FALSE	FALSE	1
GADD45B	FALSE	FALSE	FALSE	FALSE	TRUE	FALSE	FALSE	FALSE	1
GAK	FALSE	FALSE	FALSE	FALSE	TRUE	FALSE	FALSE	FALSE	1
GALNT13	FALSE	FALSE	FALSE	TRUE	FALSE	FALSE	FALSE	FALSE	1
GALNT7	FALSE	FALSE	FALSE	FALSE	FALSE	FALSE	FALSE	TRUE	1
GALNTL6	FALSE	FALSE	FALSE	FALSE	FALSE	FALSE	FALSE	TRUE	1
GANC	FALSE	FALSE	FALSE	FALSE	FALSE	FALSE	FALSE	TRUE	1
GAPDH	FALSE	FALSE	FALSE	TRUE	FALSE	FALSE	FALSE	FALSE	1
GART	FALSE	FALSE	FALSE	FALSE	TRUE	FALSE	FALSE	FALSE	1
GAS2L1	FALSE	FALSE	FALSE	FALSE	TRUE	FALSE	FALSE	FALSE	1
GATA3	FALSE	TRUE	FALSE	FALSE	FALSE	FALSE	FALSE	FALSE	1
GATAD2A	FALSE	FALSE	FALSE	FALSE	TRUE	FALSE	FALSE	FALSE	1
GBA2	FALSE	FALSE	FALSE	FALSE	TRUE	FALSE	FALSE	FALSE	1
GBP2	FALSE	FALSE	FALSE	TRUE	FALSE	FALSE	FALSE	FALSE	1
GBX2	FALSE	FALSE	FALSE	FALSE	FALSE	FALSE	TRUE	FALSE	1
GCNT1	FALSE	FALSE	FALSE	FALSE	TRUE	FALSE	FALSE	FALSE	1
GCNT2	FALSE	FALSE	FALSE	FALSE	TRUE	FALSE	FALSE	FALSE	1
GDF6	FALSE	FALSE	FALSE	FALSE	TRUE	FALSE	FALSE	FALSE	1
GDPD5	FALSE	FALSE	FALSE	FALSE	TRUE	FALSE	FALSE	FALSE	1
GEM	FALSE	FALSE	FALSE	FALSE	TRUE	FALSE	FALSE	FALSE	1
GEMIN4	FALSE	FALSE	FALSE	FALSE	FALSE	FALSE	FALSE	TRUE	1
GFAP	FALSE	FALSE	FALSE	FALSE	FALSE	FALSE	FALSE	TRUE	1
GFOD1	FALSE	FALSE	FALSE	FALSE	TRUE	FALSE	FALSE	FALSE	1
GGA1	FALSE	FALSE	FALSE	FALSE	TRUE	FALSE	FALSE	FALSE	1
GGA2	FALSE	FALSE	FALSE	FALSE	TRUE	FALSE	FALSE	FALSE	1
GGCT	FALSE	FALSE	FALSE	FALSE	TRUE	FALSE	FALSE	FALSE	1
GGH	FALSE	FALSE	FALSE	FALSE	TRUE	FALSE	FALSE	FALSE	1
GINS4	FALSE	FALSE	FALSE	FALSE	FALSE	FALSE	FALSE	TRUE	1
GJA1	FALSE	FALSE	FALSE	FALSE	TRUE	FALSE	FALSE	FALSE	1
GK	FALSE	FALSE	FALSE	FALSE	FALSE	FALSE	FALSE	TRUE	1
GLE1	FALSE	FALSE	FALSE	FALSE	TRUE	FALSE	FALSE	FALSE	1
GLIPR1	FALSE	FALSE	FALSE	FALSE	TRUE	FALSE	FALSE	FALSE	1
GLMP	FALSE	FALSE	FALSE	FALSE	FALSE	FALSE	FALSE	TRUE	1
GLRX3	FALSE	FALSE	FALSE	FALSE	TRUE	FALSE	FALSE	FALSE	1
GMPPB	FALSE	FALSE	FALSE	FALSE	FALSE	FALSE	FALSE	TRUE	1
GMPR	FALSE	FALSE	FALSE	FALSE	TRUE	FALSE	FALSE	FALSE	1
GNA11	FALSE	FALSE	FALSE	FALSE	TRUE	FALSE	FALSE	FALSE	1
GNAI2	FALSE	FALSE	FALSE	TRUE	FALSE	FALSE	FALSE	FALSE	1
GNAI3	FALSE	FALSE	FALSE	FALSE	TRUE	FALSE	FALSE	FALSE	1
GNAQ	FALSE	TRUE	FALSE	FALSE	FALSE	FALSE	FALSE	FALSE	1
GNAS	FALSE	FALSE	FALSE	FALSE	FALSE	FALSE	FALSE	TRUE	1
GNB3	FALSE	FALSE	FALSE	TRUE	FALSE	FALSE	FALSE	FALSE	1
GNG11	FALSE	FALSE	FALSE	FALSE	TRUE	FALSE	FALSE	FALSE	1
GNG12	FALSE	FALSE	FALSE	TRUE	FALSE	FALSE	FALSE	FALSE	1
GNG13	FALSE	TRUE	FALSE	FALSE	FALSE	FALSE	FALSE	FALSE	1
GNL2	FALSE	FALSE	TRUE	FALSE	FALSE	FALSE	FALSE	FALSE	1
GOLGA7	FALSE	FALSE	FALSE	FALSE	TRUE	FALSE	FALSE	FALSE	1
GOLM1	FALSE	FALSE	FALSE	FALSE	TRUE	FALSE	FALSE	FALSE	1
GOLT1B	FALSE	FALSE	FALSE	FALSE	TRUE	FALSE	FALSE	FALSE	1
GORASP1	FALSE	FALSE	FALSE	FALSE	FALSE	FALSE	FALSE	TRUE	1
GPANK1	FALSE	FALSE	FALSE	FALSE	TRUE	FALSE	FALSE	FALSE	1
GPN1	FALSE	FALSE	FALSE	FALSE	TRUE	FALSE	FALSE	FALSE	1
GPR160	FALSE	FALSE	FALSE	FALSE	FALSE	FALSE	FALSE	TRUE	1
GPR179	FALSE	TRUE	FALSE	FALSE	FALSE	FALSE	FALSE	FALSE	1
GPR39	FALSE	FALSE	FALSE	FALSE	TRUE	FALSE	FALSE	FALSE	1
GPR45	FALSE	TRUE	FALSE	FALSE	FALSE	FALSE	FALSE	FALSE	1
GPSM1	FALSE	FALSE	FALSE	FALSE	FALSE	FALSE	FALSE	TRUE	1
GPX2	FALSE	FALSE	FALSE	FALSE	FALSE	FALSE	FALSE	TRUE	1
GPX8	FALSE	FALSE	FALSE	FALSE	TRUE	FALSE	FALSE	FALSE	1
GRIA4	FALSE	FALSE	FALSE	FALSE	FALSE	FALSE	FALSE	TRUE	1
GRIN2A	FALSE	TRUE	FALSE	FALSE	FALSE	FALSE	FALSE	FALSE	1
GRN	FALSE	FALSE	FALSE	TRUE	FALSE	FALSE	FALSE	FALSE	1
GSR	FALSE	FALSE	FALSE	FALSE	TRUE	FALSE	FALSE	FALSE	1
GSTM4	FALSE	FALSE	FALSE	FALSE	TRUE	FALSE	FALSE	FALSE	1
GTF2F2	FALSE	FALSE	FALSE	FALSE	TRUE	FALSE	FALSE	FALSE	1
GTF2I	FALSE	FALSE	TRUE	FALSE	FALSE	FALSE	FALSE	FALSE	1
GTF3C1	FALSE	FALSE	FALSE	TRUE	FALSE	FALSE	FALSE	FALSE	1
GTPBP2	FALSE	FALSE	FALSE	FALSE	FALSE	FALSE	FALSE	TRUE	1
GUCD1	FALSE	FALSE	FALSE	FALSE	TRUE	FALSE	FALSE	FALSE	1
GYG1	FALSE	FALSE	FALSE	FALSE	FALSE	FALSE	FALSE	TRUE	1
GYPC	FALSE	FALSE	FALSE	FALSE	TRUE	FALSE	FALSE	FALSE	1
GZMH	FALSE	TRUE	FALSE	FALSE	FALSE	FALSE	FALSE	FALSE	1
H1-3	FALSE	FALSE	TRUE	FALSE	FALSE	FALSE	FALSE	FALSE	1
H2AC11	FALSE	FALSE	TRUE	FALSE	FALSE	FALSE	FALSE	FALSE	1
H2AFJ	FALSE	FALSE	FALSE	FALSE	TRUE	FALSE	FALSE	FALSE	1
H2AFX	FALSE	FALSE	FALSE	TRUE	FALSE	FALSE	FALSE	FALSE	1
H2AFZ	FALSE	FALSE	FALSE	TRUE	FALSE	FALSE	FALSE	FALSE	1
H3F3A	FALSE	FALSE	FALSE	TRUE	FALSE	FALSE	FALSE	FALSE	1
H3F3B	FALSE	TRUE	FALSE	FALSE	FALSE	FALSE	FALSE	FALSE	1
H4C1	FALSE	FALSE	TRUE	FALSE	FALSE	FALSE	FALSE	FALSE	1
HADHB	FALSE	FALSE	FALSE	TRUE	FALSE	FALSE	FALSE	FALSE	1
HAO2	FALSE	TRUE	FALSE	FALSE	FALSE	FALSE	FALSE	FALSE	1
HAUS2	FALSE	TRUE	FALSE	FALSE	FALSE	FALSE	FALSE	FALSE	1
HAUS4	FALSE	FALSE	FALSE	FALSE	FALSE	FALSE	FALSE	TRUE	1
HDAC4	FALSE	FALSE	FALSE	FALSE	FALSE	FALSE	TRUE	FALSE	1
HDAC9	FALSE	FALSE	FALSE	FALSE	FALSE	FALSE	FALSE	TRUE	1
HDGF	FALSE	FALSE	FALSE	FALSE	FALSE	FALSE	FALSE	TRUE	1
HEATR1	FALSE	FALSE	TRUE	FALSE	FALSE	FALSE	FALSE	FALSE	1
HERPUD1	FALSE	FALSE	FALSE	FALSE	TRUE	FALSE	FALSE	FALSE	1
HES1	FALSE	FALSE	FALSE	FALSE	TRUE	FALSE	FALSE	FALSE	1
HES4	FALSE	FALSE	FALSE	FALSE	TRUE	FALSE	FALSE	FALSE	1
HEXIM2	FALSE	FALSE	FALSE	FALSE	FALSE	FALSE	TRUE	FALSE	1
HHIP	FALSE	FALSE	FALSE	FALSE	TRUE	FALSE	FALSE	FALSE	1
HIRA	FALSE	FALSE	FALSE	FALSE	TRUE	FALSE	FALSE	FALSE	1
HIST1H1B	FALSE	FALSE	FALSE	TRUE	FALSE	FALSE	FALSE	FALSE	1
HIST1H1C	FALSE	FALSE	FALSE	TRUE	FALSE	FALSE	FALSE	FALSE	1
HIST1H1E	FALSE	FALSE	FALSE	TRUE	FALSE	FALSE	FALSE	FALSE	1
HIST1H2AB	FALSE	FALSE	FALSE	TRUE	FALSE	FALSE	FALSE	FALSE	1
HIST1H3A	FALSE	FALSE	FALSE	TRUE	FALSE	FALSE	FALSE	FALSE	1
HIST1H4A	FALSE	FALSE	FALSE	TRUE	FALSE	FALSE	FALSE	FALSE	1
HIST2H2AB	FALSE	FALSE	FALSE	TRUE	FALSE	FALSE	FALSE	FALSE	1
HIST2H2AC	FALSE	FALSE	FALSE	TRUE	FALSE	FALSE	FALSE	FALSE	1
HIST2H2BF	FALSE	FALSE	TRUE	FALSE	FALSE	FALSE	FALSE	FALSE	1
HIVEP1	FALSE	FALSE	FALSE	FALSE	FALSE	FALSE	TRUE	FALSE	1
HIVEP2	FALSE	FALSE	FALSE	FALSE	TRUE	FALSE	FALSE	FALSE	1
HLA-B	FALSE	FALSE	FALSE	FALSE	TRUE	FALSE	FALSE	FALSE	1
HMGB1	FALSE	FALSE	FALSE	FALSE	TRUE	FALSE	FALSE	FALSE	1
HMGB3	FALSE	FALSE	FALSE	FALSE	TRUE	FALSE	FALSE	FALSE	1
HMGCR	FALSE	FALSE	FALSE	FALSE	FALSE	FALSE	FALSE	TRUE	1
HMGN1	FALSE	FALSE	FALSE	FALSE	TRUE	FALSE	FALSE	FALSE	1
HMGXB4	FALSE	FALSE	FALSE	FALSE	TRUE	FALSE	FALSE	FALSE	1
HNRNPA3	FALSE	FALSE	FALSE	TRUE	FALSE	FALSE	FALSE	FALSE	1
HNRNPUL2	FALSE	FALSE	TRUE	FALSE	FALSE	FALSE	FALSE	FALSE	1
HOXC13	FALSE	FALSE	FALSE	FALSE	FALSE	FALSE	TRUE	FALSE	1
HPCAL1	FALSE	FALSE	FALSE	FALSE	TRUE	FALSE	FALSE	FALSE	1
HPS1	FALSE	FALSE	FALSE	FALSE	TRUE	FALSE	FALSE	FALSE	1
HPS4	FALSE	FALSE	FALSE	FALSE	TRUE	FALSE	FALSE	FALSE	1
HRNR	FALSE	FALSE	FALSE	TRUE	FALSE	FALSE	FALSE	FALSE	1
HSCB	FALSE	FALSE	FALSE	FALSE	FALSE	FALSE	FALSE	TRUE	1
HSD17B1	FALSE	FALSE	FALSE	FALSE	FALSE	FALSE	FALSE	TRUE	1
HSD17B12	FALSE	FALSE	FALSE	FALSE	FALSE	FALSE	TRUE	FALSE	1
HSDL2	FALSE	FALSE	FALSE	FALSE	FALSE	FALSE	FALSE	TRUE	1
HSF1	FALSE	FALSE	FALSE	FALSE	TRUE	FALSE	FALSE	FALSE	1
HSP90AA1	FALSE	FALSE	FALSE	FALSE	TRUE	FALSE	FALSE	FALSE	1
HSPA1A	FALSE	FALSE	TRUE	FALSE	FALSE	FALSE	FALSE	FALSE	1
HSPA1B	FALSE	FALSE	FALSE	TRUE	FALSE	FALSE	FALSE	FALSE	1
HSPA6	FALSE	FALSE	TRUE	FALSE	FALSE	FALSE	FALSE	FALSE	1
HSPBP1	FALSE	FALSE	FALSE	FALSE	TRUE	FALSE	FALSE	FALSE	1
HSPE1	FALSE	FALSE	FALSE	FALSE	FALSE	FALSE	FALSE	TRUE	1
HTRA2	FALSE	FALSE	FALSE	FALSE	FALSE	FALSE	FALSE	TRUE	1
HYI	FALSE	FALSE	FALSE	FALSE	TRUE	FALSE	FALSE	FALSE	1
IARS	FALSE	FALSE	FALSE	FALSE	TRUE	FALSE	FALSE	FALSE	1
IBTK	FALSE	FALSE	TRUE	FALSE	FALSE	FALSE	FALSE	FALSE	1
IDH2	FALSE	FALSE	FALSE	FALSE	FALSE	FALSE	FALSE	TRUE	1
IFI44L	FALSE	FALSE	FALSE	FALSE	TRUE	FALSE	FALSE	FALSE	1
IFI6	FALSE	FALSE	FALSE	FALSE	TRUE	FALSE	FALSE	FALSE	1
IFIT1	FALSE	FALSE	FALSE	FALSE	TRUE	FALSE	FALSE	FALSE	1
IFNGR1	FALSE	FALSE	FALSE	FALSE	TRUE	FALSE	FALSE	FALSE	1
IFT46	FALSE	FALSE	FALSE	FALSE	TRUE	FALSE	FALSE	FALSE	1
IFT80	FALSE	FALSE	FALSE	FALSE	FALSE	FALSE	FALSE	TRUE	1
IFT81	FALSE	FALSE	FALSE	TRUE	FALSE	FALSE	FALSE	FALSE	1
IGF1R	FALSE	FALSE	FALSE	FALSE	FALSE	FALSE	FALSE	TRUE	1
IGF2R	FALSE	FALSE	FALSE	FALSE	TRUE	FALSE	FALSE	FALSE	1
IGFBP3	FALSE	FALSE	FALSE	FALSE	TRUE	FALSE	FALSE	FALSE	1
IGFBP7	FALSE	FALSE	FALSE	FALSE	TRUE	FALSE	FALSE	FALSE	1
IGHG2	FALSE	FALSE	FALSE	TRUE	FALSE	FALSE	FALSE	FALSE	1
IGKV1-13	FALSE	FALSE	FALSE	TRUE	FALSE	FALSE	FALSE	FALSE	1
IGKV1D-33	FALSE	FALSE	TRUE	FALSE	FALSE	FALSE	FALSE	FALSE	1
IGKV4-1	FALSE	FALSE	FALSE	TRUE	FALSE	FALSE	FALSE	FALSE	1
IGLC2	FALSE	FALSE	FALSE	TRUE	FALSE	FALSE	FALSE	FALSE	1
IGLV4-60	FALSE	FALSE	FALSE	TRUE	FALSE	FALSE	FALSE	FALSE	1
IGSF3	FALSE	FALSE	FALSE	FALSE	TRUE	FALSE	FALSE	FALSE	1
IKBKB	FALSE	FALSE	FALSE	FALSE	TRUE	FALSE	FALSE	FALSE	1
IL11	FALSE	FALSE	FALSE	FALSE	TRUE	FALSE	FALSE	FALSE	1
IL32	FALSE	FALSE	FALSE	FALSE	TRUE	FALSE	FALSE	FALSE	1
IL7	FALSE	FALSE	FALSE	FALSE	FALSE	FALSE	FALSE	TRUE	1
ILK	FALSE	TRUE	FALSE	FALSE	FALSE	FALSE	FALSE	FALSE	1
INF2	FALSE	FALSE	FALSE	FALSE	TRUE	FALSE	FALSE	FALSE	1
INHBA	FALSE	FALSE	FALSE	FALSE	TRUE	FALSE	FALSE	FALSE	1
INTS6	FALSE	FALSE	FALSE	FALSE	TRUE	FALSE	FALSE	FALSE	1
IP6K1	FALSE	FALSE	FALSE	FALSE	FALSE	FALSE	FALSE	TRUE	1
IRAK1	FALSE	FALSE	FALSE	FALSE	TRUE	FALSE	FALSE	FALSE	1
IRF3	FALSE	FALSE	FALSE	FALSE	FALSE	FALSE	FALSE	TRUE	1
IRF7	FALSE	FALSE	FALSE	FALSE	TRUE	FALSE	FALSE	FALSE	1
ISG15	FALSE	FALSE	FALSE	FALSE	TRUE	FALSE	FALSE	FALSE	1
ISOC2	FALSE	FALSE	FALSE	FALSE	TRUE	FALSE	FALSE	FALSE	1
ITFG1	FALSE	FALSE	FALSE	FALSE	TRUE	FALSE	FALSE	FALSE	1
ITGA2	FALSE	FALSE	FALSE	FALSE	TRUE	FALSE	FALSE	FALSE	1
ITGB8	FALSE	FALSE	FALSE	FALSE	TRUE	FALSE	FALSE	FALSE	1
JAM3	FALSE	FALSE	FALSE	FALSE	TRUE	FALSE	FALSE	FALSE	1
JOSD1	FALSE	FALSE	FALSE	FALSE	TRUE	FALSE	FALSE	FALSE	1
JUNB	FALSE	FALSE	FALSE	TRUE	FALSE	FALSE	FALSE	FALSE	1
KANK2	FALSE	FALSE	FALSE	FALSE	TRUE	FALSE	FALSE	FALSE	1
KCNJ1	FALSE	FALSE	FALSE	FALSE	FALSE	FALSE	FALSE	TRUE	1
KCNJ10	FALSE	FALSE	FALSE	FALSE	FALSE	FALSE	FALSE	TRUE	1
KCNMA1	FALSE	FALSE	FALSE	FALSE	TRUE	FALSE	FALSE	FALSE	1
KCTD12	FALSE	FALSE	FALSE	FALSE	TRUE	FALSE	FALSE	FALSE	1
KCTD17	FALSE	FALSE	FALSE	TRUE	FALSE	FALSE	FALSE	FALSE	1
KCTD19	FALSE	FALSE	FALSE	FALSE	FALSE	FALSE	FALSE	TRUE	1
KCTD2	FALSE	FALSE	FALSE	TRUE	FALSE	FALSE	FALSE	FALSE	1
KCTD20	FALSE	FALSE	FALSE	FALSE	FALSE	FALSE	FALSE	TRUE	1
KCTD5	FALSE	FALSE	FALSE	TRUE	FALSE	FALSE	FALSE	FALSE	1
KDELR3	FALSE	FALSE	FALSE	FALSE	FALSE	FALSE	FALSE	TRUE	1
KDM1A	FALSE	FALSE	FALSE	FALSE	FALSE	FALSE	FALSE	TRUE	1
KDM5B	FALSE	FALSE	FALSE	FALSE	TRUE	FALSE	FALSE	FALSE	1
KHSRP	FALSE	FALSE	TRUE	FALSE	FALSE	FALSE	FALSE	FALSE	1
KIAA0100	FALSE	FALSE	FALSE	FALSE	TRUE	FALSE	FALSE	FALSE	1
KIDINS220	FALSE	TRUE	FALSE	FALSE	FALSE	FALSE	FALSE	FALSE	1
KIF18B	FALSE	FALSE	FALSE	FALSE	TRUE	FALSE	FALSE	FALSE	1
KIF2A	FALSE	FALSE	FALSE	FALSE	FALSE	FALSE	FALSE	TRUE	1
KIFC1	FALSE	FALSE	FALSE	FALSE	FALSE	FALSE	FALSE	TRUE	1
KIFC3	FALSE	FALSE	FALSE	FALSE	FALSE	FALSE	FALSE	TRUE	1
KISS1	FALSE	FALSE	FALSE	FALSE	TRUE	FALSE	FALSE	FALSE	1
KLC3	FALSE	FALSE	FALSE	FALSE	FALSE	FALSE	FALSE	TRUE	1
KLC4	FALSE	FALSE	FALSE	FALSE	FALSE	FALSE	FALSE	TRUE	1
KLF12	FALSE	FALSE	FALSE	FALSE	TRUE	FALSE	FALSE	FALSE	1
KLF13	FALSE	FALSE	FALSE	FALSE	TRUE	FALSE	FALSE	FALSE	1
KLHL12	FALSE	FALSE	FALSE	FALSE	FALSE	FALSE	FALSE	TRUE	1
KLHL21	FALSE	FALSE	FALSE	FALSE	TRUE	FALSE	FALSE	FALSE	1
KLHL35	FALSE	FALSE	FALSE	FALSE	TRUE	FALSE	FALSE	FALSE	1
KLHL4	FALSE	FALSE	FALSE	FALSE	TRUE	FALSE	FALSE	FALSE	1
KLHL42	FALSE	FALSE	FALSE	FALSE	FALSE	FALSE	FALSE	TRUE	1
KLHL7	FALSE	FALSE	FALSE	FALSE	TRUE	FALSE	FALSE	FALSE	1
KLRC2	FALSE	FALSE	FALSE	FALSE	TRUE	FALSE	FALSE	FALSE	1
KMT5A	FALSE	TRUE	FALSE	FALSE	FALSE	FALSE	FALSE	FALSE	1
KPNA2	FALSE	FALSE	FALSE	FALSE	TRUE	FALSE	FALSE	FALSE	1
KPNA7	FALSE	FALSE	FALSE	FALSE	FALSE	FALSE	TRUE	FALSE	1
KRR1	FALSE	FALSE	TRUE	FALSE	FALSE	FALSE	FALSE	FALSE	1
KRT19	FALSE	FALSE	TRUE	FALSE	FALSE	FALSE	FALSE	FALSE	1
KRT24	FALSE	FALSE	FALSE	TRUE	FALSE	FALSE	FALSE	FALSE	1
KRT76	FALSE	FALSE	FALSE	TRUE	FALSE	FALSE	FALSE	FALSE	1
KRT77	FALSE	FALSE	TRUE	FALSE	FALSE	FALSE	FALSE	FALSE	1
KRT8	FALSE	FALSE	TRUE	FALSE	FALSE	FALSE	FALSE	FALSE	1
KRT81	FALSE	FALSE	FALSE	FALSE	TRUE	FALSE	FALSE	FALSE	1
L3MBTL2	FALSE	FALSE	FALSE	FALSE	TRUE	FALSE	FALSE	FALSE	1
LACTB	FALSE	FALSE	FALSE	TRUE	FALSE	FALSE	FALSE	FALSE	1
LAMA3	FALSE	FALSE	FALSE	FALSE	TRUE	FALSE	FALSE	FALSE	1
LAMA4	FALSE	FALSE	FALSE	FALSE	TRUE	FALSE	FALSE	FALSE	1
LAMP1	FALSE	FALSE	FALSE	FALSE	TRUE	FALSE	FALSE	FALSE	1
LAPTM4A	FALSE	FALSE	FALSE	FALSE	TRUE	FALSE	FALSE	FALSE	1
LAPTM4B	FALSE	FALSE	FALSE	FALSE	FALSE	FALSE	FALSE	TRUE	1
LARP1	FALSE	FALSE	TRUE	FALSE	FALSE	FALSE	FALSE	FALSE	1
LARP4	FALSE	FALSE	FALSE	TRUE	FALSE	FALSE	FALSE	FALSE	1
LARP6	FALSE	FALSE	FALSE	FALSE	TRUE	FALSE	FALSE	FALSE	1
LASP1	FALSE	FALSE	FALSE	TRUE	FALSE	FALSE	FALSE	FALSE	1
LBR	FALSE	FALSE	FALSE	TRUE	FALSE	FALSE	FALSE	FALSE	1
LCA5L	FALSE	FALSE	FALSE	FALSE	FALSE	FALSE	FALSE	TRUE	1
LDHA	FALSE	FALSE	FALSE	FALSE	TRUE	FALSE	FALSE	FALSE	1
LDLR	FALSE	FALSE	FALSE	FALSE	TRUE	FALSE	FALSE	FALSE	1
LEMD2	FALSE	TRUE	FALSE	FALSE	FALSE	FALSE	FALSE	FALSE	1
LETM1	FALSE	FALSE	FALSE	FALSE	TRUE	FALSE	FALSE	FALSE	1
LGALS3BP	FALSE	FALSE	FALSE	FALSE	TRUE	FALSE	FALSE	FALSE	1
LGMN	FALSE	FALSE	FALSE	FALSE	TRUE	FALSE	FALSE	FALSE	1
LIMK2	FALSE	FALSE	FALSE	FALSE	FALSE	FALSE	FALSE	TRUE	1
LIN54	FALSE	FALSE	FALSE	FALSE	FALSE	FALSE	FALSE	TRUE	1
LITAF	FALSE	FALSE	FALSE	FALSE	TRUE	FALSE	FALSE	FALSE	1
LMAN1	FALSE	FALSE	FALSE	TRUE	FALSE	FALSE	FALSE	FALSE	1
LMF2	FALSE	FALSE	FALSE	FALSE	TRUE	FALSE	FALSE	FALSE	1
LMNA	FALSE	FALSE	FALSE	TRUE	FALSE	FALSE	FALSE	FALSE	1
LMO7	FALSE	FALSE	FALSE	FALSE	TRUE	FALSE	FALSE	FALSE	1
LNPEP	FALSE	FALSE	FALSE	FALSE	FALSE	FALSE	FALSE	TRUE	1
LONP1	FALSE	FALSE	FALSE	FALSE	TRUE	FALSE	FALSE	FALSE	1
LPCAT1	FALSE	FALSE	FALSE	FALSE	TRUE	FALSE	FALSE	FALSE	1
LPCAT2	FALSE	FALSE	FALSE	FALSE	TRUE	FALSE	FALSE	FALSE	1
LRP3	FALSE	FALSE	FALSE	FALSE	TRUE	FALSE	FALSE	FALSE	1
LRRC17	FALSE	FALSE	FALSE	FALSE	TRUE	FALSE	FALSE	FALSE	1
LRRC8A	FALSE	FALSE	FALSE	FALSE	TRUE	FALSE	FALSE	FALSE	1
LSM12	FALSE	FALSE	FALSE	TRUE	FALSE	FALSE	FALSE	FALSE	1
LTBR	FALSE	FALSE	FALSE	FALSE	TRUE	FALSE	FALSE	FALSE	1
LUC7L2	FALSE	TRUE	FALSE	FALSE	FALSE	FALSE	FALSE	FALSE	1
LUZP2	FALSE	FALSE	FALSE	FALSE	TRUE	FALSE	FALSE	FALSE	1
LYAR	FALSE	FALSE	TRUE	FALSE	FALSE	FALSE	FALSE	FALSE	1
LZTFL1	FALSE	FALSE	FALSE	FALSE	TRUE	FALSE	FALSE	FALSE	1
M1AP	FALSE	FALSE	FALSE	FALSE	FALSE	FALSE	FALSE	TRUE	1
MAD2L1	FALSE	FALSE	FALSE	FALSE	TRUE	FALSE	FALSE	FALSE	1
MADCAM1	FALSE	FALSE	FALSE	FALSE	FALSE	FALSE	FALSE	TRUE	1
MAGOHB	FALSE	FALSE	FALSE	TRUE	FALSE	FALSE	FALSE	FALSE	1
MANEAL	FALSE	FALSE	FALSE	FALSE	FALSE	FALSE	FALSE	TRUE	1
MANF	FALSE	FALSE	FALSE	FALSE	TRUE	FALSE	FALSE	FALSE	1
MAP1A	FALSE	FALSE	FALSE	FALSE	TRUE	FALSE	FALSE	FALSE	1
MAP1B	FALSE	FALSE	FALSE	FALSE	FALSE	FALSE	FALSE	TRUE	1
MAP1LC3A	FALSE	FALSE	FALSE	FALSE	TRUE	FALSE	FALSE	FALSE	1
MAP3K13	FALSE	FALSE	FALSE	FALSE	FALSE	FALSE	FALSE	TRUE	1
MAP4	FALSE	FALSE	FALSE	TRUE	FALSE	FALSE	FALSE	FALSE	1
MAPK12	FALSE	FALSE	FALSE	FALSE	TRUE	FALSE	FALSE	FALSE	1
MAPKAPK2	FALSE	FALSE	TRUE	FALSE	FALSE	FALSE	FALSE	FALSE	1
MAPRE2	FALSE	FALSE	FALSE	FALSE	TRUE	FALSE	FALSE	FALSE	1
MAPRE3	FALSE	FALSE	FALSE	FALSE	TRUE	FALSE	FALSE	FALSE	1
2023-03-04	FALSE	FALSE	FALSE	FALSE	TRUE	FALSE	FALSE	FALSE	1
MARCKSL1	FALSE	FALSE	FALSE	FALSE	TRUE	FALSE	FALSE	FALSE	1
MARF1	FALSE	FALSE	FALSE	FALSE	FALSE	FALSE	FALSE	TRUE	1
MARVELD3	FALSE	FALSE	FALSE	FALSE	FALSE	FALSE	FALSE	TRUE	1
MAST2	FALSE	FALSE	FALSE	FALSE	FALSE	FALSE	FALSE	TRUE	1
MATN3	FALSE	FALSE	FALSE	FALSE	TRUE	FALSE	FALSE	FALSE	1
MATR3	FALSE	FALSE	TRUE	FALSE	FALSE	FALSE	FALSE	FALSE	1
MBD3	FALSE	FALSE	FALSE	FALSE	TRUE	FALSE	FALSE	FALSE	1
MBNL1	FALSE	FALSE	FALSE	TRUE	FALSE	FALSE	FALSE	FALSE	1
MBTD1	FALSE	TRUE	FALSE	FALSE	FALSE	FALSE	FALSE	FALSE	1
MCCC1	FALSE	FALSE	FALSE	TRUE	FALSE	FALSE	FALSE	FALSE	1
MCFD2	FALSE	FALSE	FALSE	FALSE	FALSE	FALSE	FALSE	TRUE	1
MCM3	FALSE	FALSE	FALSE	FALSE	TRUE	FALSE	FALSE	FALSE	1
MCM5	FALSE	FALSE	FALSE	FALSE	TRUE	FALSE	FALSE	FALSE	1
MCRIP1	FALSE	FALSE	FALSE	TRUE	FALSE	FALSE	FALSE	FALSE	1
MDC1	FALSE	FALSE	TRUE	FALSE	FALSE	FALSE	FALSE	FALSE	1
MDFIC	FALSE	FALSE	FALSE	FALSE	TRUE	FALSE	FALSE	FALSE	1
MDH2	FALSE	FALSE	FALSE	FALSE	TRUE	FALSE	FALSE	FALSE	1
MDK	FALSE	FALSE	FALSE	FALSE	TRUE	FALSE	FALSE	FALSE	1
MEAF6	FALSE	FALSE	FALSE	FALSE	TRUE	FALSE	FALSE	FALSE	1
MED15	FALSE	FALSE	FALSE	FALSE	TRUE	FALSE	FALSE	FALSE	1
MED29	FALSE	FALSE	FALSE	FALSE	FALSE	FALSE	FALSE	TRUE	1
MED4	FALSE	FALSE	FALSE	FALSE	TRUE	FALSE	FALSE	FALSE	1
MEGF11	FALSE	FALSE	FALSE	FALSE	FALSE	FALSE	FALSE	TRUE	1
MEGF9	FALSE	FALSE	FALSE	FALSE	TRUE	FALSE	FALSE	FALSE	1
MEIS2	FALSE	FALSE	FALSE	FALSE	FALSE	FALSE	FALSE	TRUE	1
MEIS3	FALSE	FALSE	FALSE	FALSE	TRUE	FALSE	FALSE	FALSE	1
MESD	FALSE	FALSE	FALSE	FALSE	FALSE	FALSE	FALSE	TRUE	1
MEST	FALSE	FALSE	FALSE	FALSE	TRUE	FALSE	FALSE	FALSE	1
MFAP2	FALSE	FALSE	FALSE	FALSE	TRUE	FALSE	FALSE	FALSE	1
MFAP4	FALSE	FALSE	FALSE	TRUE	FALSE	FALSE	FALSE	FALSE	1
MFSD12	FALSE	FALSE	FALSE	FALSE	TRUE	FALSE	FALSE	FALSE	1
MFSD3	FALSE	FALSE	FALSE	FALSE	FALSE	FALSE	FALSE	TRUE	1
MGARP	FALSE	FALSE	FALSE	FALSE	TRUE	FALSE	FALSE	FALSE	1
MGAT1	FALSE	FALSE	FALSE	FALSE	FALSE	FALSE	FALSE	TRUE	1
MGMT	FALSE	FALSE	FALSE	FALSE	TRUE	FALSE	FALSE	FALSE	1
MGST1	FALSE	FALSE	FALSE	FALSE	TRUE	FALSE	FALSE	FALSE	1
MIC13	FALSE	FALSE	FALSE	TRUE	FALSE	FALSE	FALSE	FALSE	1
MICAL1	FALSE	FALSE	FALSE	FALSE	FALSE	FALSE	FALSE	TRUE	1
MICAL3	FALSE	FALSE	FALSE	FALSE	TRUE	FALSE	FALSE	FALSE	1
MICALL1	FALSE	FALSE	FALSE	FALSE	TRUE	FALSE	FALSE	FALSE	1
MIDN	FALSE	FALSE	FALSE	FALSE	FALSE	FALSE	TRUE	FALSE	1
MIEF1	FALSE	FALSE	FALSE	FALSE	TRUE	FALSE	FALSE	FALSE	1
MIF	FALSE	FALSE	FALSE	FALSE	TRUE	FALSE	FALSE	FALSE	1
MIGA1	FALSE	FALSE	FALSE	FALSE	FALSE	FALSE	FALSE	TRUE	1
MIS18A	FALSE	FALSE	FALSE	FALSE	TRUE	FALSE	FALSE	FALSE	1
MLLT11	FALSE	FALSE	FALSE	FALSE	TRUE	FALSE	FALSE	FALSE	1
MLLT6	FALSE	FALSE	FALSE	FALSE	TRUE	FALSE	FALSE	FALSE	1
MMACHC	FALSE	FALSE	FALSE	FALSE	FALSE	FALSE	FALSE	TRUE	1
MMD2	FALSE	FALSE	FALSE	TRUE	FALSE	FALSE	FALSE	FALSE	1
MME	FALSE	FALSE	FALSE	FALSE	TRUE	FALSE	FALSE	FALSE	1
MMP2	FALSE	FALSE	FALSE	FALSE	TRUE	FALSE	FALSE	FALSE	1
MMTAG2	FALSE	FALSE	FALSE	TRUE	FALSE	FALSE	FALSE	FALSE	1
MOB1A	FALSE	FALSE	FALSE	FALSE	TRUE	FALSE	FALSE	FALSE	1
MOB4	FALSE	FALSE	FALSE	FALSE	FALSE	FALSE	FALSE	TRUE	1
MOG	FALSE	FALSE	FALSE	TRUE	FALSE	FALSE	FALSE	FALSE	1
MORC2	FALSE	FALSE	TRUE	FALSE	FALSE	FALSE	FALSE	FALSE	1
MORC3	FALSE	FALSE	FALSE	FALSE	FALSE	FALSE	TRUE	FALSE	1
MORC4	FALSE	FALSE	FALSE	FALSE	TRUE	FALSE	FALSE	FALSE	1
MORF4L2	FALSE	FALSE	FALSE	TRUE	FALSE	FALSE	FALSE	FALSE	1
MOV10	FALSE	FALSE	FALSE	TRUE	FALSE	FALSE	FALSE	FALSE	1
MPDU1	FALSE	FALSE	FALSE	FALSE	FALSE	FALSE	FALSE	TRUE	1
MPI	FALSE	FALSE	FALSE	FALSE	FALSE	FALSE	FALSE	TRUE	1
MPP2	FALSE	FALSE	FALSE	FALSE	TRUE	FALSE	FALSE	FALSE	1
MPP6	FALSE	FALSE	FALSE	FALSE	FALSE	FALSE	FALSE	TRUE	1
MPPE1	FALSE	FALSE	FALSE	FALSE	FALSE	FALSE	FALSE	TRUE	1
MPRIP	FALSE	FALSE	TRUE	FALSE	FALSE	FALSE	FALSE	FALSE	1
MPST	FALSE	FALSE	FALSE	FALSE	TRUE	FALSE	FALSE	FALSE	1
MRAS	FALSE	FALSE	FALSE	FALSE	TRUE	FALSE	FALSE	FALSE	1
MRPL1	FALSE	FALSE	FALSE	FALSE	TRUE	FALSE	FALSE	FALSE	1
MRPL19	FALSE	FALSE	FALSE	FALSE	TRUE	FALSE	FALSE	FALSE	1
MRPL21	FALSE	FALSE	FALSE	FALSE	TRUE	FALSE	FALSE	FALSE	1
MRPL3	FALSE	FALSE	FALSE	FALSE	TRUE	FALSE	FALSE	FALSE	1
MRPL32	FALSE	FALSE	FALSE	FALSE	TRUE	FALSE	FALSE	FALSE	1
MRPL39	FALSE	FALSE	FALSE	FALSE	TRUE	FALSE	FALSE	FALSE	1
MRPL47	FALSE	FALSE	FALSE	FALSE	TRUE	FALSE	FALSE	FALSE	1
MRPS18C	FALSE	FALSE	FALSE	FALSE	TRUE	FALSE	FALSE	FALSE	1
MRPS6	FALSE	FALSE	FALSE	FALSE	TRUE	FALSE	FALSE	FALSE	1
MRRF	FALSE	FALSE	FALSE	FALSE	FALSE	FALSE	FALSE	TRUE	1
MSANTD3	FALSE	FALSE	FALSE	FALSE	TRUE	FALSE	FALSE	FALSE	1
MSH6	FALSE	FALSE	FALSE	TRUE	FALSE	FALSE	FALSE	FALSE	1
MSL2	FALSE	FALSE	FALSE	FALSE	FALSE	FALSE	FALSE	TRUE	1
MSMP	FALSE	FALSE	FALSE	FALSE	TRUE	FALSE	FALSE	FALSE	1
MSRB1	FALSE	FALSE	FALSE	FALSE	TRUE	FALSE	FALSE	FALSE	1
MT1F	FALSE	FALSE	FALSE	FALSE	TRUE	FALSE	FALSE	FALSE	1
MT1X	FALSE	FALSE	FALSE	FALSE	TRUE	FALSE	FALSE	FALSE	1
MT2A	FALSE	FALSE	FALSE	FALSE	TRUE	FALSE	FALSE	FALSE	1
MTA2	FALSE	FALSE	FALSE	TRUE	FALSE	FALSE	FALSE	FALSE	1
MTFP1	FALSE	FALSE	FALSE	FALSE	TRUE	FALSE	FALSE	FALSE	1
MTHFD1L	FALSE	FALSE	FALSE	FALSE	TRUE	FALSE	FALSE	FALSE	1
MTHFD2	FALSE	FALSE	FALSE	FALSE	TRUE	FALSE	FALSE	FALSE	1
MTMR7	FALSE	FALSE	FALSE	FALSE	FALSE	FALSE	FALSE	TRUE	1
MTX1	FALSE	FALSE	FALSE	FALSE	TRUE	FALSE	FALSE	FALSE	1
MVP	FALSE	FALSE	FALSE	FALSE	TRUE	FALSE	FALSE	FALSE	1
MXD3	FALSE	FALSE	FALSE	FALSE	FALSE	FALSE	FALSE	TRUE	1
MYBBP1A	FALSE	FALSE	TRUE	FALSE	FALSE	FALSE	FALSE	FALSE	1
MYEF2	FALSE	FALSE	TRUE	FALSE	FALSE	FALSE	FALSE	FALSE	1
MYEOV	FALSE	FALSE	FALSE	FALSE	FALSE	TRUE	FALSE	FALSE	1
MYH9	FALSE	FALSE	TRUE	FALSE	FALSE	FALSE	FALSE	FALSE	1
MYL12B	FALSE	FALSE	FALSE	TRUE	FALSE	FALSE	FALSE	FALSE	1
MYL6B	FALSE	FALSE	FALSE	TRUE	FALSE	FALSE	FALSE	FALSE	1
MYO1B	FALSE	FALSE	TRUE	FALSE	FALSE	FALSE	FALSE	FALSE	1
MYO1C	FALSE	FALSE	TRUE	FALSE	FALSE	FALSE	FALSE	FALSE	1
MYO1D	FALSE	FALSE	TRUE	FALSE	FALSE	FALSE	FALSE	FALSE	1
MYO5A	FALSE	FALSE	TRUE	FALSE	FALSE	FALSE	FALSE	FALSE	1
MYO9B	FALSE	FALSE	FALSE	FALSE	TRUE	FALSE	FALSE	FALSE	1
MYOCD	FALSE	FALSE	FALSE	FALSE	TRUE	FALSE	FALSE	FALSE	1
MZT1	FALSE	FALSE	FALSE	FALSE	TRUE	FALSE	FALSE	FALSE	1
NAA50	FALSE	FALSE	FALSE	FALSE	FALSE	FALSE	FALSE	TRUE	1
NACC2	FALSE	FALSE	FALSE	FALSE	TRUE	FALSE	FALSE	FALSE	1
NAE1	FALSE	FALSE	FALSE	FALSE	TRUE	FALSE	FALSE	FALSE	1
NAPEPLD	FALSE	FALSE	FALSE	FALSE	FALSE	FALSE	FALSE	TRUE	1
NAT1	FALSE	FALSE	FALSE	FALSE	TRUE	FALSE	FALSE	FALSE	1
NAXE	FALSE	FALSE	FALSE	FALSE	FALSE	FALSE	FALSE	TRUE	1
NCAPH2	FALSE	FALSE	FALSE	FALSE	TRUE	FALSE	FALSE	FALSE	1
NCBP2	FALSE	FALSE	FALSE	TRUE	FALSE	FALSE	FALSE	FALSE	1
NCLN	FALSE	FALSE	FALSE	FALSE	TRUE	FALSE	FALSE	FALSE	1
NDFIP1	FALSE	FALSE	FALSE	FALSE	TRUE	FALSE	FALSE	FALSE	1
NDP	FALSE	FALSE	FALSE	FALSE	TRUE	FALSE	FALSE	FALSE	1
NDRG4	FALSE	FALSE	FALSE	FALSE	FALSE	FALSE	FALSE	TRUE	1
NDUFA5	FALSE	FALSE	FALSE	FALSE	FALSE	FALSE	FALSE	TRUE	1
NDUFC2	FALSE	FALSE	FALSE	FALSE	TRUE	FALSE	FALSE	FALSE	1
NDUFS4	FALSE	FALSE	FALSE	FALSE	TRUE	FALSE	FALSE	FALSE	1
NDUFS5	FALSE	FALSE	FALSE	FALSE	TRUE	FALSE	FALSE	FALSE	1
NEDD9	FALSE	FALSE	FALSE	FALSE	TRUE	FALSE	FALSE	FALSE	1
NEK2	FALSE	FALSE	FALSE	TRUE	FALSE	FALSE	FALSE	FALSE	1
NELFB	FALSE	FALSE	FALSE	FALSE	TRUE	FALSE	FALSE	FALSE	1
NEMF	FALSE	FALSE	FALSE	FALSE	FALSE	FALSE	FALSE	TRUE	1
NES	FALSE	FALSE	FALSE	FALSE	TRUE	FALSE	FALSE	FALSE	1
NFE2	FALSE	TRUE	FALSE	FALSE	FALSE	FALSE	FALSE	FALSE	1
NFE2L1	FALSE	FALSE	FALSE	FALSE	TRUE	FALSE	FALSE	FALSE	1
NFIA	FALSE	FALSE	FALSE	FALSE	TRUE	FALSE	FALSE	FALSE	1
NFX1	FALSE	FALSE	FALSE	FALSE	TRUE	FALSE	FALSE	FALSE	1
NGF	FALSE	FALSE	FALSE	FALSE	TRUE	FALSE	FALSE	FALSE	1
NHP2	FALSE	FALSE	FALSE	TRUE	FALSE	FALSE	FALSE	FALSE	1
NINJ1	FALSE	FALSE	FALSE	FALSE	TRUE	FALSE	FALSE	FALSE	1
NIP7	FALSE	FALSE	FALSE	TRUE	FALSE	FALSE	FALSE	FALSE	1
NIPBL	FALSE	FALSE	FALSE	FALSE	FALSE	FALSE	FALSE	TRUE	1
NIT2	FALSE	FALSE	FALSE	FALSE	TRUE	FALSE	FALSE	FALSE	1
NKRF	FALSE	FALSE	TRUE	FALSE	FALSE	FALSE	FALSE	FALSE	1
NKX2-5	FALSE	TRUE	FALSE	FALSE	FALSE	FALSE	FALSE	FALSE	1
NLRC5	FALSE	FALSE	FALSE	FALSE	TRUE	FALSE	FALSE	FALSE	1
NLRP1	FALSE	FALSE	FALSE	FALSE	TRUE	FALSE	FALSE	FALSE	1
NME6	FALSE	FALSE	FALSE	FALSE	FALSE	FALSE	FALSE	TRUE	1
NMT2	FALSE	FALSE	FALSE	FALSE	TRUE	FALSE	FALSE	FALSE	1
NOC2L	FALSE	FALSE	TRUE	FALSE	FALSE	FALSE	FALSE	FALSE	1
NOC3L	FALSE	FALSE	TRUE	FALSE	FALSE	FALSE	FALSE	FALSE	1
NODAL	FALSE	FALSE	FALSE	FALSE	FALSE	FALSE	FALSE	TRUE	1
NOL10	FALSE	FALSE	TRUE	FALSE	FALSE	FALSE	FALSE	FALSE	1
NOL11	FALSE	FALSE	TRUE	FALSE	FALSE	FALSE	FALSE	FALSE	1
NOL6	FALSE	FALSE	TRUE	FALSE	FALSE	FALSE	FALSE	FALSE	1
NOLC1	FALSE	FALSE	TRUE	FALSE	FALSE	FALSE	FALSE	FALSE	1
NOP16	FALSE	FALSE	FALSE	TRUE	FALSE	FALSE	FALSE	FALSE	1
NOP2	FALSE	FALSE	TRUE	FALSE	FALSE	FALSE	FALSE	FALSE	1
NOSIP	FALSE	FALSE	FALSE	FALSE	TRUE	FALSE	FALSE	FALSE	1
NOVA2	FALSE	FALSE	FALSE	TRUE	FALSE	FALSE	FALSE	FALSE	1
NPC1	FALSE	FALSE	FALSE	FALSE	TRUE	FALSE	FALSE	FALSE	1
NPTX1	FALSE	FALSE	FALSE	FALSE	TRUE	FALSE	FALSE	FALSE	1
NPW	FALSE	FALSE	FALSE	FALSE	TRUE	FALSE	FALSE	FALSE	1
NQO1	FALSE	FALSE	FALSE	FALSE	TRUE	FALSE	FALSE	FALSE	1
NR0B1	FALSE	FALSE	FALSE	FALSE	TRUE	FALSE	FALSE	FALSE	1
NR0B2	FALSE	TRUE	FALSE	FALSE	FALSE	FALSE	FALSE	FALSE	1
NR3C2	FALSE	FALSE	FALSE	FALSE	FALSE	FALSE	FALSE	TRUE	1
NREP	FALSE	FALSE	FALSE	FALSE	TRUE	FALSE	FALSE	FALSE	1
NRP1	FALSE	FALSE	FALSE	FALSE	TRUE	FALSE	FALSE	FALSE	1
NRP2	FALSE	FALSE	FALSE	FALSE	FALSE	FALSE	TRUE	FALSE	1
NSA2	FALSE	FALSE	FALSE	TRUE	FALSE	FALSE	FALSE	FALSE	1
NSD3	FALSE	FALSE	FALSE	FALSE	FALSE	FALSE	FALSE	TRUE	1
NSFL1C	FALSE	FALSE	FALSE	FALSE	TRUE	FALSE	FALSE	FALSE	1
NSL1	FALSE	FALSE	FALSE	FALSE	TRUE	FALSE	FALSE	FALSE	1
NT5C3A	FALSE	FALSE	FALSE	FALSE	TRUE	FALSE	FALSE	FALSE	1
NT5C3B	FALSE	TRUE	FALSE	FALSE	FALSE	FALSE	FALSE	FALSE	1
NT5DC3	FALSE	FALSE	FALSE	FALSE	TRUE	FALSE	FALSE	FALSE	1
NTM	FALSE	FALSE	FALSE	FALSE	TRUE	FALSE	FALSE	FALSE	1
NUAK2	FALSE	FALSE	FALSE	FALSE	FALSE	TRUE	FALSE	FALSE	1
NUDCD1	FALSE	FALSE	FALSE	FALSE	FALSE	FALSE	FALSE	TRUE	1
NUDT13	FALSE	FALSE	FALSE	FALSE	FALSE	FALSE	FALSE	TRUE	1
NUDT15	FALSE	FALSE	FALSE	FALSE	TRUE	FALSE	FALSE	FALSE	1
NUDT2	FALSE	FALSE	FALSE	FALSE	TRUE	FALSE	FALSE	FALSE	1
NUDT21	FALSE	FALSE	FALSE	TRUE	FALSE	FALSE	FALSE	FALSE	1
NUF2	FALSE	FALSE	FALSE	FALSE	TRUE	FALSE	FALSE	FALSE	1
NUMA1	FALSE	FALSE	TRUE	FALSE	FALSE	FALSE	FALSE	FALSE	1
NUMB	FALSE	FALSE	FALSE	FALSE	FALSE	FALSE	FALSE	TRUE	1
NUP188	FALSE	FALSE	FALSE	FALSE	TRUE	FALSE	FALSE	FALSE	1
NUP214	FALSE	FALSE	FALSE	FALSE	TRUE	FALSE	FALSE	FALSE	1
NUP50	FALSE	FALSE	FALSE	FALSE	TRUE	FALSE	FALSE	FALSE	1
NUP93	FALSE	FALSE	TRUE	FALSE	FALSE	FALSE	FALSE	FALSE	1
NXN	FALSE	FALSE	FALSE	FALSE	TRUE	FALSE	FALSE	FALSE	1
OAS2	FALSE	FALSE	FALSE	TRUE	FALSE	FALSE	FALSE	FALSE	1
OCIAD2	FALSE	FALSE	FALSE	FALSE	TRUE	FALSE	FALSE	FALSE	1
ODF2	FALSE	FALSE	FALSE	FALSE	TRUE	FALSE	FALSE	FALSE	1
OIP5	FALSE	FALSE	FALSE	FALSE	FALSE	FALSE	FALSE	TRUE	1
OMG	FALSE	FALSE	FALSE	FALSE	FALSE	FALSE	FALSE	TRUE	1
OR13A1	FALSE	FALSE	TRUE	FALSE	FALSE	FALSE	FALSE	FALSE	1
OR4F29	FALSE	TRUE	FALSE	FALSE	FALSE	FALSE	FALSE	FALSE	1
OSBP2	FALSE	FALSE	FALSE	FALSE	FALSE	FALSE	FALSE	TRUE	1
OSTC	FALSE	FALSE	FALSE	FALSE	FALSE	FALSE	TRUE	FALSE	1
OXSM	FALSE	FALSE	FALSE	FALSE	FALSE	FALSE	FALSE	TRUE	1
PACSIN2	FALSE	FALSE	FALSE	FALSE	TRUE	FALSE	FALSE	FALSE	1
PACSIN3	FALSE	FALSE	FALSE	FALSE	TRUE	FALSE	FALSE	FALSE	1
PAG1	FALSE	FALSE	FALSE	FALSE	TRUE	FALSE	FALSE	FALSE	1
PAGE1	FALSE	FALSE	FALSE	FALSE	TRUE	FALSE	FALSE	FALSE	1
PAIP2	FALSE	FALSE	FALSE	FALSE	TRUE	FALSE	FALSE	FALSE	1
PAIP2B	FALSE	FALSE	FALSE	FALSE	TRUE	FALSE	FALSE	FALSE	1
PAN2	FALSE	FALSE	FALSE	FALSE	FALSE	FALSE	FALSE	TRUE	1
PAPSS1	FALSE	FALSE	FALSE	FALSE	TRUE	FALSE	FALSE	FALSE	1
PAQR5	FALSE	FALSE	FALSE	FALSE	FALSE	FALSE	FALSE	TRUE	1
PARD3	FALSE	FALSE	FALSE	FALSE	TRUE	FALSE	FALSE	FALSE	1
PARD6A	FALSE	FALSE	FALSE	FALSE	FALSE	FALSE	FALSE	TRUE	1
PARP1	FALSE	FALSE	TRUE	FALSE	FALSE	FALSE	FALSE	FALSE	1
PATE1	FALSE	FALSE	FALSE	FALSE	FALSE	FALSE	FALSE	TRUE	1
PAWR	FALSE	FALSE	FALSE	FALSE	TRUE	FALSE	FALSE	FALSE	1
PAX8	FALSE	TRUE	FALSE	FALSE	FALSE	FALSE	FALSE	FALSE	1
PBK	FALSE	FALSE	FALSE	FALSE	TRUE	FALSE	FALSE	FALSE	1
PCBP1	FALSE	FALSE	FALSE	TRUE	FALSE	FALSE	FALSE	FALSE	1
PCBP2	FALSE	FALSE	FALSE	TRUE	FALSE	FALSE	FALSE	FALSE	1
PCDH9	FALSE	FALSE	FALSE	FALSE	TRUE	FALSE	FALSE	FALSE	1
PCED1B	FALSE	FALSE	FALSE	FALSE	FALSE	FALSE	FALSE	TRUE	1
PCNA	FALSE	FALSE	FALSE	FALSE	TRUE	FALSE	FALSE	FALSE	1
PCNP	FALSE	FALSE	FALSE	FALSE	TRUE	FALSE	FALSE	FALSE	1
PCOLCE2	FALSE	FALSE	FALSE	FALSE	TRUE	FALSE	FALSE	FALSE	1
PDCD10	FALSE	FALSE	FALSE	FALSE	TRUE	FALSE	FALSE	FALSE	1
PDCD11	FALSE	FALSE	TRUE	FALSE	FALSE	FALSE	FALSE	FALSE	1
PDCD6	FALSE	FALSE	FALSE	FALSE	FALSE	FALSE	FALSE	TRUE	1
PDE1C	FALSE	FALSE	FALSE	FALSE	TRUE	FALSE	FALSE	FALSE	1
PDE4D	FALSE	FALSE	FALSE	FALSE	TRUE	FALSE	FALSE	FALSE	1
PDE6B	FALSE	FALSE	FALSE	FALSE	FALSE	FALSE	FALSE	TRUE	1
PDE6G	FALSE	FALSE	FALSE	FALSE	FALSE	FALSE	FALSE	TRUE	1
PDIA6	FALSE	FALSE	FALSE	FALSE	TRUE	FALSE	FALSE	FALSE	1
PDLIM3	FALSE	FALSE	FALSE	FALSE	TRUE	FALSE	FALSE	FALSE	1
PDLIM4	FALSE	FALSE	FALSE	FALSE	TRUE	FALSE	FALSE	FALSE	1
PDLIM5	FALSE	FALSE	FALSE	TRUE	FALSE	FALSE	FALSE	FALSE	1
PDXDC1	FALSE	FALSE	FALSE	FALSE	FALSE	FALSE	FALSE	TRUE	1
PDZD4	FALSE	FALSE	FALSE	FALSE	FALSE	FALSE	FALSE	TRUE	1
PEG10	FALSE	FALSE	FALSE	FALSE	TRUE	FALSE	FALSE	FALSE	1
PELP1	FALSE	FALSE	TRUE	FALSE	FALSE	FALSE	FALSE	FALSE	1
PEMT	FALSE	FALSE	FALSE	FALSE	TRUE	FALSE	FALSE	FALSE	1
PEX26	FALSE	FALSE	FALSE	FALSE	TRUE	FALSE	FALSE	FALSE	1
PFKFB3	FALSE	FALSE	FALSE	FALSE	TRUE	FALSE	FALSE	FALSE	1
PGD	FALSE	FALSE	FALSE	FALSE	TRUE	FALSE	FALSE	FALSE	1
PGF	FALSE	FALSE	FALSE	FALSE	TRUE	FALSE	FALSE	FALSE	1
PGPEP1	FALSE	FALSE	FALSE	FALSE	TRUE	FALSE	FALSE	FALSE	1
PHC2	FALSE	FALSE	FALSE	FALSE	TRUE	FALSE	FALSE	FALSE	1
PHEX	FALSE	FALSE	FALSE	FALSE	TRUE	FALSE	FALSE	FALSE	1
PHF10	FALSE	FALSE	FALSE	FALSE	TRUE	FALSE	FALSE	FALSE	1
PHF14	FALSE	FALSE	FALSE	FALSE	TRUE	FALSE	FALSE	FALSE	1
PHF5A	FALSE	FALSE	FALSE	FALSE	TRUE	FALSE	FALSE	FALSE	1
PHF6	FALSE	FALSE	FALSE	TRUE	FALSE	FALSE	FALSE	FALSE	1
PHLDA1	FALSE	FALSE	FALSE	FALSE	TRUE	FALSE	FALSE	FALSE	1
PHYHIPL	FALSE	FALSE	FALSE	FALSE	FALSE	FALSE	TRUE	FALSE	1
PI4KA	FALSE	FALSE	FALSE	FALSE	TRUE	FALSE	FALSE	FALSE	1
PIGM	FALSE	FALSE	FALSE	FALSE	TRUE	FALSE	FALSE	FALSE	1
PIGS	FALSE	TRUE	FALSE	FALSE	FALSE	FALSE	FALSE	FALSE	1
PIM1	FALSE	FALSE	FALSE	FALSE	FALSE	FALSE	TRUE	FALSE	1
PIM3	FALSE	FALSE	FALSE	FALSE	TRUE	FALSE	FALSE	FALSE	1
PINK1	FALSE	FALSE	FALSE	FALSE	FALSE	FALSE	FALSE	TRUE	1
PIP4K2B	FALSE	FALSE	FALSE	FALSE	FALSE	TRUE	FALSE	FALSE	1
PIR	FALSE	FALSE	FALSE	FALSE	TRUE	FALSE	FALSE	FALSE	1
PISD	FALSE	FALSE	FALSE	FALSE	TRUE	FALSE	FALSE	FALSE	1
PITPNC1	FALSE	FALSE	FALSE	FALSE	FALSE	FALSE	TRUE	FALSE	1
PITPNM3	FALSE	FALSE	FALSE	FALSE	TRUE	FALSE	FALSE	FALSE	1
PKN1	FALSE	FALSE	FALSE	FALSE	TRUE	FALSE	FALSE	FALSE	1
PLAC8	FALSE	FALSE	FALSE	FALSE	TRUE	FALSE	FALSE	FALSE	1
PLAT	FALSE	FALSE	FALSE	FALSE	TRUE	FALSE	FALSE	FALSE	1
PLAU	FALSE	FALSE	FALSE	FALSE	TRUE	FALSE	FALSE	FALSE	1
PLCB3	FALSE	FALSE	TRUE	FALSE	FALSE	FALSE	FALSE	FALSE	1
PLCXD1	FALSE	FALSE	FALSE	FALSE	FALSE	FALSE	FALSE	TRUE	1
PLEK2	FALSE	FALSE	FALSE	FALSE	FALSE	FALSE	FALSE	TRUE	1
PLEKHF2	FALSE	FALSE	FALSE	FALSE	TRUE	FALSE	FALSE	FALSE	1
PLEKHG1	FALSE	FALSE	FALSE	FALSE	FALSE	FALSE	FALSE	TRUE	1
PLEKHM2	FALSE	FALSE	FALSE	FALSE	TRUE	FALSE	FALSE	FALSE	1
PLP2	FALSE	FALSE	FALSE	FALSE	TRUE	FALSE	FALSE	FALSE	1
PLPP1	FALSE	FALSE	FALSE	FALSE	FALSE	FALSE	FALSE	TRUE	1
PLPP5	FALSE	FALSE	FALSE	FALSE	FALSE	FALSE	FALSE	TRUE	1
PLXNA1	FALSE	FALSE	FALSE	FALSE	TRUE	FALSE	FALSE	FALSE	1
PLXNB2	FALSE	FALSE	FALSE	FALSE	TRUE	FALSE	FALSE	FALSE	1
PLXNC1	FALSE	FALSE	FALSE	FALSE	FALSE	FALSE	FALSE	TRUE	1
PMEPA1	FALSE	FALSE	FALSE	FALSE	TRUE	FALSE	FALSE	FALSE	1
PMP22	FALSE	FALSE	FALSE	FALSE	TRUE	FALSE	FALSE	FALSE	1
PNCK	FALSE	FALSE	FALSE	TRUE	FALSE	FALSE	FALSE	FALSE	1
PNKD	FALSE	FALSE	FALSE	FALSE	TRUE	FALSE	FALSE	FALSE	1
PNN	FALSE	FALSE	TRUE	FALSE	FALSE	FALSE	FALSE	FALSE	1
PODXL	FALSE	FALSE	FALSE	FALSE	FALSE	FALSE	FALSE	TRUE	1
POLD4	FALSE	FALSE	FALSE	FALSE	FALSE	FALSE	FALSE	TRUE	1
POLR2A	FALSE	FALSE	FALSE	TRUE	FALSE	FALSE	FALSE	FALSE	1
POLR2B	FALSE	FALSE	TRUE	FALSE	FALSE	FALSE	FALSE	FALSE	1
POLR2C	FALSE	FALSE	FALSE	FALSE	TRUE	FALSE	FALSE	FALSE	1
POLR2F	FALSE	FALSE	FALSE	FALSE	TRUE	FALSE	FALSE	FALSE	1
POLR2G	FALSE	FALSE	FALSE	FALSE	TRUE	FALSE	FALSE	FALSE	1
POLR2H	FALSE	FALSE	FALSE	FALSE	FALSE	FALSE	FALSE	TRUE	1
POLR3A	FALSE	FALSE	FALSE	FALSE	TRUE	FALSE	FALSE	FALSE	1
POLR3C	FALSE	FALSE	FALSE	FALSE	FALSE	FALSE	FALSE	TRUE	1
POLRMT	FALSE	FALSE	TRUE	FALSE	FALSE	FALSE	FALSE	FALSE	1
POMT2	FALSE	FALSE	FALSE	FALSE	FALSE	FALSE	FALSE	TRUE	1
PON2	FALSE	FALSE	FALSE	FALSE	TRUE	FALSE	FALSE	FALSE	1
POPDC3	FALSE	FALSE	FALSE	FALSE	TRUE	FALSE	FALSE	FALSE	1
POR	FALSE	FALSE	FALSE	FALSE	FALSE	FALSE	FALSE	TRUE	1
POU2F3	FALSE	FALSE	FALSE	FALSE	FALSE	FALSE	TRUE	FALSE	1
PPA1	FALSE	FALSE	FALSE	FALSE	TRUE	FALSE	FALSE	FALSE	1
PPA2	FALSE	FALSE	FALSE	FALSE	TRUE	FALSE	FALSE	FALSE	1
PPAN	FALSE	FALSE	FALSE	TRUE	FALSE	FALSE	FALSE	FALSE	1
PPARG	FALSE	FALSE	FALSE	FALSE	TRUE	FALSE	FALSE	FALSE	1
PPFIBP1	FALSE	FALSE	FALSE	FALSE	TRUE	FALSE	FALSE	FALSE	1
PPIC	FALSE	FALSE	FALSE	FALSE	TRUE	FALSE	FALSE	FALSE	1
PPIL1	FALSE	FALSE	FALSE	TRUE	FALSE	FALSE	FALSE	FALSE	1
PPIL2	FALSE	FALSE	FALSE	FALSE	TRUE	FALSE	FALSE	FALSE	1
PPP1CC	FALSE	FALSE	FALSE	TRUE	FALSE	FALSE	FALSE	FALSE	1
PPP1R12A	FALSE	FALSE	FALSE	FALSE	FALSE	FALSE	FALSE	TRUE	1
PPP1R1B	FALSE	FALSE	FALSE	FALSE	FALSE	FALSE	FALSE	TRUE	1
PPP1R35	FALSE	FALSE	FALSE	FALSE	FALSE	FALSE	FALSE	TRUE	1
PPP1R9B	FALSE	FALSE	TRUE	FALSE	FALSE	FALSE	FALSE	FALSE	1
PPP2CA	FALSE	FALSE	FALSE	FALSE	TRUE	FALSE	FALSE	FALSE	1
PPP2R1B	FALSE	FALSE	FALSE	FALSE	FALSE	FALSE	FALSE	TRUE	1
PPP2R2A	FALSE	FALSE	FALSE	FALSE	FALSE	FALSE	FALSE	TRUE	1
PPP2R2B	FALSE	FALSE	FALSE	FALSE	TRUE	FALSE	FALSE	FALSE	1
PPP6R2	FALSE	FALSE	FALSE	FALSE	TRUE	FALSE	FALSE	FALSE	1
PRDX1	FALSE	FALSE	FALSE	TRUE	FALSE	FALSE	FALSE	FALSE	1
PRDX6	FALSE	FALSE	FALSE	FALSE	TRUE	FALSE	FALSE	FALSE	1
PREX1	FALSE	FALSE	FALSE	FALSE	TRUE	FALSE	FALSE	FALSE	1
PRKAA2	FALSE	FALSE	FALSE	FALSE	TRUE	FALSE	FALSE	FALSE	1
PRKAB1	FALSE	FALSE	FALSE	FALSE	FALSE	FALSE	FALSE	TRUE	1
PRKAG1	FALSE	FALSE	FALSE	FALSE	FALSE	FALSE	FALSE	TRUE	1
PRKAG2	FALSE	FALSE	FALSE	FALSE	TRUE	FALSE	FALSE	FALSE	1
PRKCI	FALSE	TRUE	FALSE	FALSE	FALSE	FALSE	FALSE	FALSE	1
PRMT1	FALSE	FALSE	FALSE	FALSE	TRUE	FALSE	FALSE	FALSE	1
PROX2	FALSE	FALSE	FALSE	FALSE	FALSE	FALSE	FALSE	TRUE	1
PRPF31	FALSE	FALSE	FALSE	FALSE	TRUE	FALSE	FALSE	FALSE	1
PRPF4B	FALSE	FALSE	TRUE	FALSE	FALSE	FALSE	FALSE	FALSE	1
PRPF6	FALSE	FALSE	FALSE	TRUE	FALSE	FALSE	FALSE	FALSE	1
PRRC2A	FALSE	FALSE	FALSE	FALSE	TRUE	FALSE	FALSE	FALSE	1
PRRC2B	FALSE	FALSE	FALSE	FALSE	TRUE	FALSE	FALSE	FALSE	1
PRSS1	FALSE	FALSE	TRUE	FALSE	FALSE	FALSE	FALSE	FALSE	1
PRSS12	FALSE	FALSE	FALSE	FALSE	TRUE	FALSE	FALSE	FALSE	1
PRSS2	FALSE	FALSE	TRUE	FALSE	FALSE	FALSE	FALSE	FALSE	1
PRSS3	FALSE	FALSE	FALSE	TRUE	FALSE	FALSE	FALSE	FALSE	1
PRSS53	FALSE	FALSE	FALSE	FALSE	FALSE	FALSE	FALSE	TRUE	1
PRUNE2	FALSE	FALSE	FALSE	FALSE	TRUE	FALSE	FALSE	FALSE	1
PSAP	FALSE	FALSE	FALSE	FALSE	TRUE	FALSE	FALSE	FALSE	1
PSCA	FALSE	FALSE	FALSE	FALSE	TRUE	FALSE	FALSE	FALSE	1
PSENEN	FALSE	FALSE	FALSE	FALSE	TRUE	FALSE	FALSE	FALSE	1
PSG5	FALSE	FALSE	FALSE	FALSE	FALSE	FALSE	FALSE	TRUE	1
PSMA1	FALSE	FALSE	FALSE	FALSE	TRUE	FALSE	FALSE	FALSE	1
PSMA2	FALSE	FALSE	FALSE	FALSE	TRUE	FALSE	FALSE	FALSE	1
PSMB8	FALSE	FALSE	FALSE	FALSE	FALSE	FALSE	FALSE	TRUE	1
PSMC4	FALSE	FALSE	FALSE	FALSE	TRUE	FALSE	FALSE	FALSE	1
PSMC6	FALSE	FALSE	FALSE	FALSE	TRUE	FALSE	FALSE	FALSE	1
PSMD4	FALSE	FALSE	FALSE	FALSE	TRUE	FALSE	FALSE	FALSE	1
PSMD6	FALSE	FALSE	FALSE	FALSE	TRUE	FALSE	FALSE	FALSE	1
PSMD8	FALSE	FALSE	FALSE	FALSE	TRUE	FALSE	FALSE	FALSE	1
PSMG1	FALSE	FALSE	FALSE	FALSE	TRUE	FALSE	FALSE	FALSE	1
PSPH	FALSE	FALSE	FALSE	FALSE	TRUE	FALSE	FALSE	FALSE	1
PSTK	FALSE	FALSE	FALSE	FALSE	TRUE	FALSE	FALSE	FALSE	1
PTGES3	FALSE	FALSE	FALSE	FALSE	TRUE	FALSE	FALSE	FALSE	1
PTGR1	FALSE	FALSE	FALSE	FALSE	TRUE	FALSE	FALSE	FALSE	1
PTK2	FALSE	FALSE	FALSE	FALSE	TRUE	FALSE	FALSE	FALSE	1
PTMS	FALSE	FALSE	FALSE	TRUE	FALSE	FALSE	FALSE	FALSE	1
PTPN21	FALSE	FALSE	FALSE	FALSE	FALSE	FALSE	FALSE	TRUE	1
PTPRK	FALSE	FALSE	FALSE	FALSE	TRUE	FALSE	FALSE	FALSE	1
PTRH1	FALSE	TRUE	FALSE	FALSE	FALSE	FALSE	FALSE	FALSE	1
PTX3	FALSE	FALSE	FALSE	FALSE	TRUE	FALSE	FALSE	FALSE	1
PUM3	FALSE	FALSE	TRUE	FALSE	FALSE	FALSE	FALSE	FALSE	1
PURB	FALSE	FALSE	FALSE	TRUE	FALSE	FALSE	FALSE	FALSE	1
PXN	FALSE	FALSE	FALSE	FALSE	TRUE	FALSE	FALSE	FALSE	1
PYGB	FALSE	FALSE	FALSE	FALSE	TRUE	FALSE	FALSE	FALSE	1
QPCT	FALSE	FALSE	FALSE	FALSE	TRUE	FALSE	FALSE	FALSE	1
RAB11FIP1	FALSE	FALSE	FALSE	FALSE	TRUE	FALSE	FALSE	FALSE	1
RAB12	FALSE	FALSE	FALSE	TRUE	FALSE	FALSE	FALSE	FALSE	1
RAB13	FALSE	FALSE	FALSE	TRUE	FALSE	FALSE	FALSE	FALSE	1
RAB1A	FALSE	FALSE	FALSE	FALSE	TRUE	FALSE	FALSE	FALSE	1
RAB24	FALSE	FALSE	FALSE	FALSE	FALSE	FALSE	FALSE	TRUE	1
RAB27B	FALSE	FALSE	FALSE	FALSE	TRUE	FALSE	FALSE	FALSE	1
RAB31	FALSE	FALSE	FALSE	FALSE	TRUE	FALSE	FALSE	FALSE	1
RAB5A	FALSE	FALSE	FALSE	FALSE	TRUE	FALSE	FALSE	FALSE	1
RAB6A	FALSE	FALSE	FALSE	FALSE	FALSE	FALSE	FALSE	TRUE	1
RABL6	FALSE	FALSE	FALSE	FALSE	TRUE	FALSE	FALSE	FALSE	1
RAC1	FALSE	FALSE	FALSE	TRUE	FALSE	FALSE	FALSE	FALSE	1
RACK1	FALSE	FALSE	FALSE	TRUE	FALSE	FALSE	FALSE	FALSE	1
RAI1	FALSE	FALSE	FALSE	FALSE	TRUE	FALSE	FALSE	FALSE	1
RALA	FALSE	FALSE	FALSE	FALSE	TRUE	FALSE	FALSE	FALSE	1
RALY	FALSE	FALSE	FALSE	TRUE	FALSE	FALSE	FALSE	FALSE	1
RAMP2	FALSE	FALSE	FALSE	FALSE	TRUE	FALSE	FALSE	FALSE	1
RAN	FALSE	FALSE	FALSE	TRUE	FALSE	FALSE	FALSE	FALSE	1
RANBP3L	FALSE	FALSE	FALSE	FALSE	FALSE	FALSE	FALSE	TRUE	1
RANGAP1	FALSE	FALSE	FALSE	FALSE	TRUE	FALSE	FALSE	FALSE	1
RANGRF	FALSE	FALSE	FALSE	FALSE	FALSE	FALSE	FALSE	TRUE	1
RAP1A	FALSE	FALSE	FALSE	FALSE	TRUE	FALSE	FALSE	FALSE	1
RAPGEF1	FALSE	FALSE	FALSE	FALSE	TRUE	FALSE	FALSE	FALSE	1
RASA3	FALSE	FALSE	FALSE	FALSE	TRUE	FALSE	FALSE	FALSE	1
RB1CC1	FALSE	TRUE	FALSE	FALSE	FALSE	FALSE	FALSE	FALSE	1
RBBP8	FALSE	FALSE	FALSE	FALSE	FALSE	FALSE	FALSE	TRUE	1
RBBP9	FALSE	FALSE	FALSE	FALSE	FALSE	FALSE	FALSE	TRUE	1
RBFOX2	FALSE	FALSE	FALSE	FALSE	TRUE	FALSE	FALSE	FALSE	1
RBM10	FALSE	FALSE	FALSE	FALSE	TRUE	FALSE	FALSE	FALSE	1
RBM22	FALSE	FALSE	FALSE	TRUE	FALSE	FALSE	FALSE	FALSE	1
RBM23	FALSE	TRUE	FALSE	FALSE	FALSE	FALSE	FALSE	FALSE	1
RBM28	FALSE	FALSE	TRUE	FALSE	FALSE	FALSE	FALSE	FALSE	1
RBM7	FALSE	FALSE	FALSE	FALSE	TRUE	FALSE	FALSE	FALSE	1
RBM8A	FALSE	FALSE	FALSE	TRUE	FALSE	FALSE	FALSE	FALSE	1
RBMS1	FALSE	FALSE	FALSE	TRUE	FALSE	FALSE	FALSE	FALSE	1
RBMS2	FALSE	FALSE	FALSE	TRUE	FALSE	FALSE	FALSE	FALSE	1
RBMXL1	FALSE	FALSE	FALSE	TRUE	FALSE	FALSE	FALSE	FALSE	1
RBP5	FALSE	FALSE	FALSE	FALSE	FALSE	FALSE	FALSE	TRUE	1
RBP7	FALSE	FALSE	FALSE	FALSE	TRUE	FALSE	FALSE	FALSE	1
RBPJ	FALSE	FALSE	FALSE	FALSE	FALSE	FALSE	TRUE	FALSE	1
RCAN1	FALSE	FALSE	FALSE	FALSE	TRUE	FALSE	FALSE	FALSE	1
RCAN3	FALSE	FALSE	FALSE	FALSE	TRUE	FALSE	FALSE	FALSE	1
RCC1	FALSE	FALSE	FALSE	TRUE	FALSE	FALSE	FALSE	FALSE	1
RCN2	FALSE	FALSE	FALSE	FALSE	TRUE	FALSE	FALSE	FALSE	1
RD3L	FALSE	FALSE	FALSE	TRUE	FALSE	FALSE	FALSE	FALSE	1
RDH13	FALSE	FALSE	FALSE	FALSE	TRUE	FALSE	FALSE	FALSE	1
RDH14	FALSE	FALSE	FALSE	FALSE	TRUE	FALSE	FALSE	FALSE	1
REC8	FALSE	FALSE	FALSE	FALSE	FALSE	FALSE	FALSE	TRUE	1
REEP3	FALSE	FALSE	FALSE	FALSE	TRUE	FALSE	FALSE	FALSE	1
RERE	FALSE	FALSE	FALSE	FALSE	TRUE	FALSE	FALSE	FALSE	1
REXO4	FALSE	FALSE	TRUE	FALSE	FALSE	FALSE	FALSE	FALSE	1
RFC4	FALSE	FALSE	FALSE	TRUE	FALSE	FALSE	FALSE	FALSE	1
RFC5	FALSE	FALSE	FALSE	TRUE	FALSE	FALSE	FALSE	FALSE	1
RGP1	FALSE	FALSE	FALSE	FALSE	TRUE	FALSE	FALSE	FALSE	1
RGS20	FALSE	FALSE	FALSE	FALSE	TRUE	FALSE	FALSE	FALSE	1
RGS5	FALSE	FALSE	FALSE	FALSE	TRUE	FALSE	FALSE	FALSE	1
RHBDD2	FALSE	FALSE	FALSE	FALSE	TRUE	FALSE	FALSE	FALSE	1
RHBDD3	FALSE	FALSE	FALSE	FALSE	TRUE	FALSE	FALSE	FALSE	1
RHEBL1	FALSE	FALSE	FALSE	FALSE	FALSE	FALSE	TRUE	FALSE	1
RHOA	FALSE	FALSE	FALSE	FALSE	TRUE	FALSE	FALSE	FALSE	1
RHOBTB1	FALSE	FALSE	FALSE	FALSE	FALSE	TRUE	FALSE	FALSE	1
RICTOR	FALSE	FALSE	FALSE	FALSE	FALSE	FALSE	TRUE	FALSE	1
RIF1	FALSE	TRUE	FALSE	FALSE	FALSE	FALSE	FALSE	FALSE	1
RIN1	FALSE	FALSE	FALSE	FALSE	TRUE	FALSE	FALSE	FALSE	1
RING1	FALSE	FALSE	FALSE	TRUE	FALSE	FALSE	FALSE	FALSE	1
RIOK2	FALSE	FALSE	FALSE	FALSE	TRUE	FALSE	FALSE	FALSE	1
RIPK4	FALSE	FALSE	FALSE	FALSE	FALSE	FALSE	TRUE	FALSE	1
RIPPLY2	FALSE	FALSE	FALSE	FALSE	TRUE	FALSE	FALSE	FALSE	1
RNASEH1	FALSE	FALSE	FALSE	FALSE	TRUE	FALSE	FALSE	FALSE	1
RNF11	FALSE	FALSE	FALSE	FALSE	TRUE	FALSE	FALSE	FALSE	1
RNF114	FALSE	FALSE	FALSE	FALSE	TRUE	FALSE	FALSE	FALSE	1
RNF115	FALSE	FALSE	FALSE	FALSE	TRUE	FALSE	FALSE	FALSE	1
RNF130	FALSE	FALSE	FALSE	FALSE	TRUE	FALSE	FALSE	FALSE	1
RNF138	FALSE	FALSE	FALSE	FALSE	TRUE	FALSE	FALSE	FALSE	1
RNF185	FALSE	FALSE	FALSE	FALSE	TRUE	FALSE	FALSE	FALSE	1
RNF24	FALSE	FALSE	FALSE	FALSE	FALSE	FALSE	TRUE	FALSE	1
RNF44	FALSE	FALSE	FALSE	FALSE	FALSE	FALSE	TRUE	FALSE	1
ROCK2	FALSE	FALSE	FALSE	TRUE	FALSE	FALSE	FALSE	FALSE	1
RPA1	FALSE	FALSE	FALSE	TRUE	FALSE	FALSE	FALSE	FALSE	1
RPE65	FALSE	TRUE	FALSE	FALSE	FALSE	FALSE	FALSE	FALSE	1
RPF2	FALSE	FALSE	FALSE	TRUE	FALSE	FALSE	FALSE	FALSE	1
RPL10	FALSE	FALSE	FALSE	TRUE	FALSE	FALSE	FALSE	FALSE	1
RPL13A	FALSE	FALSE	FALSE	TRUE	FALSE	FALSE	FALSE	FALSE	1
RPL14	FALSE	FALSE	FALSE	TRUE	FALSE	FALSE	FALSE	FALSE	1
RPL17	FALSE	FALSE	FALSE	TRUE	FALSE	FALSE	FALSE	FALSE	1
RPL18	FALSE	FALSE	TRUE	FALSE	FALSE	FALSE	FALSE	FALSE	1
RPL18A	FALSE	FALSE	FALSE	TRUE	FALSE	FALSE	FALSE	FALSE	1
RPL21	FALSE	FALSE	FALSE	TRUE	FALSE	FALSE	FALSE	FALSE	1
RPL22	FALSE	FALSE	FALSE	TRUE	FALSE	FALSE	FALSE	FALSE	1
RPL22L1	FALSE	FALSE	FALSE	FALSE	TRUE	FALSE	FALSE	FALSE	1
RPL23	FALSE	FALSE	FALSE	TRUE	FALSE	FALSE	FALSE	FALSE	1
RPL24	FALSE	FALSE	FALSE	TRUE	FALSE	FALSE	FALSE	FALSE	1
RPL26	FALSE	FALSE	FALSE	TRUE	FALSE	FALSE	FALSE	FALSE	1
RPL26L1	FALSE	FALSE	FALSE	FALSE	TRUE	FALSE	FALSE	FALSE	1
RPL27A	FALSE	FALSE	FALSE	TRUE	FALSE	FALSE	FALSE	FALSE	1
RPL28	FALSE	FALSE	FALSE	TRUE	FALSE	FALSE	FALSE	FALSE	1
RPL32	FALSE	FALSE	FALSE	TRUE	FALSE	FALSE	FALSE	FALSE	1
RPL34	FALSE	FALSE	FALSE	TRUE	FALSE	FALSE	FALSE	FALSE	1
RPL35	FALSE	FALSE	FALSE	TRUE	FALSE	FALSE	FALSE	FALSE	1
RPL36	FALSE	FALSE	FALSE	TRUE	FALSE	FALSE	FALSE	FALSE	1
RPL36AL	FALSE	FALSE	FALSE	TRUE	FALSE	FALSE	FALSE	FALSE	1
RPL37	FALSE	FALSE	FALSE	TRUE	FALSE	FALSE	FALSE	FALSE	1
RPL37A	FALSE	FALSE	FALSE	TRUE	FALSE	FALSE	FALSE	FALSE	1
RPL39	FALSE	FALSE	FALSE	TRUE	FALSE	FALSE	FALSE	FALSE	1
RPL3L	FALSE	FALSE	TRUE	FALSE	FALSE	FALSE	FALSE	FALSE	1
RPL7L1	FALSE	FALSE	FALSE	TRUE	FALSE	FALSE	FALSE	FALSE	1
RPL9	FALSE	FALSE	FALSE	TRUE	FALSE	FALSE	FALSE	FALSE	1
RPLP0	FALSE	FALSE	FALSE	TRUE	FALSE	FALSE	FALSE	FALSE	1
RPN1	FALSE	FALSE	FALSE	TRUE	FALSE	FALSE	FALSE	FALSE	1
RPP40	FALSE	FALSE	FALSE	FALSE	TRUE	FALSE	FALSE	FALSE	1
RPS10	FALSE	FALSE	FALSE	TRUE	FALSE	FALSE	FALSE	FALSE	1
RPS11	FALSE	FALSE	FALSE	TRUE	FALSE	FALSE	FALSE	FALSE	1
RPS12	FALSE	FALSE	FALSE	FALSE	TRUE	FALSE	FALSE	FALSE	1
RPS13	FALSE	FALSE	FALSE	TRUE	FALSE	FALSE	FALSE	FALSE	1
RPS15	FALSE	FALSE	FALSE	TRUE	FALSE	FALSE	FALSE	FALSE	1
RPS17	FALSE	FALSE	FALSE	TRUE	FALSE	FALSE	FALSE	FALSE	1
RPS19	FALSE	FALSE	FALSE	TRUE	FALSE	FALSE	FALSE	FALSE	1
RPS20	FALSE	FALSE	FALSE	TRUE	FALSE	FALSE	FALSE	FALSE	1
RPS25	FALSE	FALSE	FALSE	TRUE	FALSE	FALSE	FALSE	FALSE	1
RPS26	FALSE	FALSE	FALSE	TRUE	FALSE	FALSE	FALSE	FALSE	1
RPS27	FALSE	FALSE	FALSE	TRUE	FALSE	FALSE	FALSE	FALSE	1
RPS27A	FALSE	FALSE	FALSE	TRUE	FALSE	FALSE	FALSE	FALSE	1
RPS29	FALSE	FALSE	FALSE	TRUE	FALSE	FALSE	FALSE	FALSE	1
RPS3	FALSE	FALSE	FALSE	TRUE	FALSE	FALSE	FALSE	FALSE	1
RPS6KA2	FALSE	FALSE	FALSE	FALSE	TRUE	FALSE	FALSE	FALSE	1
RPS7	FALSE	FALSE	FALSE	TRUE	FALSE	FALSE	FALSE	FALSE	1
RPTOR	FALSE	FALSE	FALSE	FALSE	TRUE	FALSE	FALSE	FALSE	1
RRAS2	FALSE	FALSE	FALSE	TRUE	FALSE	FALSE	FALSE	FALSE	1
RRBP1	FALSE	FALSE	FALSE	TRUE	FALSE	FALSE	FALSE	FALSE	1
RREB1	FALSE	TRUE	FALSE	FALSE	FALSE	FALSE	FALSE	FALSE	1
RRP12	FALSE	FALSE	TRUE	FALSE	FALSE	FALSE	FALSE	FALSE	1
RRP15	FALSE	FALSE	FALSE	FALSE	TRUE	FALSE	FALSE	FALSE	1
RRP1B	FALSE	FALSE	TRUE	FALSE	FALSE	FALSE	FALSE	FALSE	1
RRP7A	FALSE	FALSE	FALSE	FALSE	TRUE	FALSE	FALSE	FALSE	1
RSRC1	FALSE	FALSE	FALSE	FALSE	TRUE	FALSE	FALSE	FALSE	1
RTCB	FALSE	FALSE	FALSE	TRUE	FALSE	FALSE	FALSE	FALSE	1
RTKN2	FALSE	FALSE	FALSE	FALSE	TRUE	FALSE	FALSE	FALSE	1
RTN3	FALSE	FALSE	FALSE	FALSE	TRUE	FALSE	FALSE	FALSE	1
RUFY2	FALSE	FALSE	FALSE	FALSE	FALSE	FALSE	FALSE	TRUE	1
RUNX1	FALSE	FALSE	FALSE	FALSE	FALSE	TRUE	FALSE	FALSE	1
RUSC1	FALSE	FALSE	FALSE	FALSE	FALSE	FALSE	FALSE	TRUE	1
RUSC2	FALSE	FALSE	FALSE	FALSE	TRUE	FALSE	FALSE	FALSE	1
RXRA	FALSE	FALSE	FALSE	FALSE	TRUE	FALSE	FALSE	FALSE	1
S100A2	FALSE	FALSE	FALSE	FALSE	TRUE	FALSE	FALSE	FALSE	1
S100A9	FALSE	FALSE	FALSE	TRUE	FALSE	FALSE	FALSE	FALSE	1
S100PBP	FALSE	FALSE	FALSE	FALSE	FALSE	FALSE	FALSE	TRUE	1
SAFB	FALSE	FALSE	TRUE	FALSE	FALSE	FALSE	FALSE	FALSE	1
SAFB2	FALSE	FALSE	TRUE	FALSE	FALSE	FALSE	FALSE	FALSE	1
SAMD9	FALSE	FALSE	FALSE	FALSE	TRUE	FALSE	FALSE	FALSE	1
SAMSN1	FALSE	FALSE	FALSE	FALSE	TRUE	FALSE	FALSE	FALSE	1
SAP18	FALSE	FALSE	FALSE	TRUE	FALSE	FALSE	FALSE	FALSE	1
SAPCD2	FALSE	FALSE	FALSE	FALSE	FALSE	FALSE	TRUE	FALSE	1
SAR1A	FALSE	FALSE	FALSE	FALSE	FALSE	FALSE	FALSE	TRUE	1
SAR1B	FALSE	FALSE	FALSE	FALSE	TRUE	FALSE	FALSE	FALSE	1
SAYSD1	FALSE	FALSE	FALSE	FALSE	TRUE	FALSE	FALSE	FALSE	1
SBDS	FALSE	FALSE	FALSE	FALSE	TRUE	FALSE	FALSE	FALSE	1
SBF1	FALSE	FALSE	FALSE	FALSE	TRUE	FALSE	FALSE	FALSE	1
SBNO2	FALSE	FALSE	FALSE	FALSE	TRUE	FALSE	FALSE	FALSE	1
SCAF1	FALSE	FALSE	FALSE	TRUE	FALSE	FALSE	FALSE	FALSE	1
SCAF4	FALSE	FALSE	FALSE	FALSE	FALSE	FALSE	TRUE	FALSE	1
SCARA3	FALSE	FALSE	FALSE	FALSE	TRUE	FALSE	FALSE	FALSE	1
SCARB1	FALSE	FALSE	FALSE	FALSE	TRUE	FALSE	FALSE	FALSE	1
SCCPDH	FALSE	FALSE	FALSE	FALSE	TRUE	FALSE	FALSE	FALSE	1
SCIMP	FALSE	FALSE	FALSE	FALSE	FALSE	FALSE	FALSE	TRUE	1
SCO2	FALSE	FALSE	FALSE	FALSE	TRUE	FALSE	FALSE	FALSE	1
SCOC	FALSE	FALSE	FALSE	FALSE	FALSE	FALSE	FALSE	TRUE	1
SCP2	FALSE	FALSE	FALSE	FALSE	TRUE	FALSE	FALSE	FALSE	1
SCRIB	FALSE	FALSE	FALSE	FALSE	TRUE	FALSE	FALSE	FALSE	1
SCRT1	FALSE	TRUE	FALSE	FALSE	FALSE	FALSE	FALSE	FALSE	1
SCYL2	FALSE	FALSE	FALSE	TRUE	FALSE	FALSE	FALSE	FALSE	1
SDC2	FALSE	FALSE	FALSE	FALSE	TRUE	FALSE	FALSE	FALSE	1
SDHA	FALSE	FALSE	FALSE	TRUE	FALSE	FALSE	FALSE	FALSE	1
SDHC	FALSE	FALSE	FALSE	FALSE	TRUE	FALSE	FALSE	FALSE	1
SDHD	FALSE	FALSE	FALSE	FALSE	TRUE	FALSE	FALSE	FALSE	1
SEC11A	FALSE	FALSE	FALSE	FALSE	FALSE	FALSE	TRUE	FALSE	1
SEC13	FALSE	FALSE	FALSE	FALSE	FALSE	FALSE	FALSE	TRUE	1
SEC16A	FALSE	FALSE	FALSE	FALSE	TRUE	FALSE	FALSE	FALSE	1
SEC24C	FALSE	FALSE	FALSE	FALSE	TRUE	FALSE	FALSE	FALSE	1
SEL1L2	FALSE	FALSE	TRUE	FALSE	FALSE	FALSE	FALSE	FALSE	1
SEMA3A	FALSE	FALSE	FALSE	FALSE	TRUE	FALSE	FALSE	FALSE	1
SEMA5A	FALSE	FALSE	FALSE	FALSE	TRUE	FALSE	FALSE	FALSE	1
2023-09-09	FALSE	FALSE	FALSE	FALSE	TRUE	FALSE	FALSE	FALSE	1
SERINC2	FALSE	FALSE	FALSE	FALSE	TRUE	FALSE	FALSE	FALSE	1
SERPINB2	FALSE	FALSE	FALSE	FALSE	TRUE	FALSE	FALSE	FALSE	1
SERPINB6	FALSE	FALSE	FALSE	TRUE	FALSE	FALSE	FALSE	FALSE	1
SERPINH1	FALSE	FALSE	FALSE	TRUE	FALSE	FALSE	FALSE	FALSE	1
SERTAD2	FALSE	FALSE	FALSE	FALSE	TRUE	FALSE	FALSE	FALSE	1
SETD2	FALSE	FALSE	FALSE	FALSE	FALSE	FALSE	FALSE	TRUE	1
SETD7	FALSE	FALSE	FALSE	FALSE	FALSE	FALSE	FALSE	TRUE	1
SETMAR	FALSE	FALSE	FALSE	FALSE	FALSE	FALSE	FALSE	TRUE	1
SF1	FALSE	FALSE	TRUE	FALSE	FALSE	FALSE	FALSE	FALSE	1
SF3A1	FALSE	FALSE	TRUE	FALSE	FALSE	FALSE	FALSE	FALSE	1
SF3A2	FALSE	FALSE	FALSE	TRUE	FALSE	FALSE	FALSE	FALSE	1
SF3A3	FALSE	FALSE	FALSE	FALSE	FALSE	FALSE	TRUE	FALSE	1
SF3B1	FALSE	FALSE	TRUE	FALSE	FALSE	FALSE	FALSE	FALSE	1
SF3B3	FALSE	FALSE	TRUE	FALSE	FALSE	FALSE	FALSE	FALSE	1
SF3B4	FALSE	FALSE	FALSE	FALSE	TRUE	FALSE	FALSE	FALSE	1
SF3B6	FALSE	FALSE	FALSE	TRUE	FALSE	FALSE	FALSE	FALSE	1
SGCB	FALSE	FALSE	FALSE	FALSE	TRUE	FALSE	FALSE	FALSE	1
SGCG	FALSE	FALSE	FALSE	FALSE	FALSE	FALSE	FALSE	TRUE	1
SGMS2	FALSE	FALSE	FALSE	FALSE	FALSE	FALSE	FALSE	TRUE	1
SGSM2	FALSE	FALSE	FALSE	FALSE	TRUE	FALSE	FALSE	FALSE	1
SGSM3	FALSE	FALSE	FALSE	FALSE	TRUE	FALSE	FALSE	FALSE	1
SH2B1	FALSE	FALSE	FALSE	FALSE	TRUE	FALSE	FALSE	FALSE	1
SH2B3	FALSE	FALSE	FALSE	FALSE	TRUE	FALSE	FALSE	FALSE	1
SH3GLB2	FALSE	FALSE	FALSE	FALSE	TRUE	FALSE	FALSE	FALSE	1
SHC3	FALSE	FALSE	FALSE	FALSE	FALSE	FALSE	TRUE	FALSE	1
SHISA5	FALSE	FALSE	FALSE	FALSE	FALSE	FALSE	FALSE	TRUE	1
SIGMAR1	FALSE	FALSE	FALSE	FALSE	TRUE	FALSE	FALSE	FALSE	1
SIRT3	FALSE	FALSE	FALSE	FALSE	FALSE	FALSE	FALSE	TRUE	1
SKP1	FALSE	FALSE	FALSE	FALSE	TRUE	FALSE	FALSE	FALSE	1
SLC16A4	FALSE	FALSE	FALSE	FALSE	FALSE	FALSE	FALSE	TRUE	1
SLC20A1	FALSE	FALSE	FALSE	FALSE	TRUE	FALSE	FALSE	FALSE	1
SLC24A5	FALSE	FALSE	FALSE	TRUE	FALSE	FALSE	FALSE	FALSE	1
SLC25A11	FALSE	FALSE	FALSE	TRUE	FALSE	FALSE	FALSE	FALSE	1
SLC25A3	FALSE	FALSE	FALSE	TRUE	FALSE	FALSE	FALSE	FALSE	1
SLC25A36	FALSE	FALSE	FALSE	FALSE	FALSE	FALSE	TRUE	FALSE	1
SLC25A37	FALSE	FALSE	FALSE	FALSE	TRUE	FALSE	FALSE	FALSE	1
SLC25A43	FALSE	FALSE	FALSE	FALSE	FALSE	FALSE	FALSE	TRUE	1
SLC25A6	FALSE	FALSE	FALSE	TRUE	FALSE	FALSE	FALSE	FALSE	1
SLC26A2	FALSE	FALSE	FALSE	FALSE	TRUE	FALSE	FALSE	FALSE	1
SLC27A4	FALSE	FALSE	FALSE	FALSE	TRUE	FALSE	FALSE	FALSE	1
SLC34A2	FALSE	FALSE	FALSE	FALSE	FALSE	FALSE	TRUE	FALSE	1
SLC35B2	FALSE	FALSE	FALSE	FALSE	TRUE	FALSE	FALSE	FALSE	1
SLC35D2	FALSE	FALSE	FALSE	FALSE	TRUE	FALSE	FALSE	FALSE	1
SLC39A4	FALSE	FALSE	FALSE	FALSE	TRUE	FALSE	FALSE	FALSE	1
SLC39A7	FALSE	FALSE	FALSE	FALSE	FALSE	FALSE	FALSE	TRUE	1
SLC44A3	FALSE	FALSE	FALSE	FALSE	FALSE	FALSE	FALSE	TRUE	1
SLC4A2	FALSE	FALSE	FALSE	FALSE	TRUE	FALSE	FALSE	FALSE	1
SLC4A4	FALSE	FALSE	FALSE	FALSE	TRUE	FALSE	FALSE	FALSE	1
SLC7A11	FALSE	FALSE	FALSE	FALSE	TRUE	FALSE	FALSE	FALSE	1
SLC7A2	FALSE	FALSE	FALSE	FALSE	TRUE	FALSE	FALSE	FALSE	1
SLC7A5	FALSE	FALSE	FALSE	FALSE	TRUE	FALSE	FALSE	FALSE	1
SLFN5	FALSE	FALSE	FALSE	FALSE	TRUE	FALSE	FALSE	FALSE	1
SLIT2	FALSE	FALSE	FALSE	FALSE	TRUE	FALSE	FALSE	FALSE	1
SMARCA4	FALSE	FALSE	TRUE	FALSE	FALSE	FALSE	FALSE	FALSE	1
SMARCAD1	FALSE	FALSE	FALSE	FALSE	FALSE	FALSE	TRUE	FALSE	1
SMC1A	FALSE	FALSE	TRUE	FALSE	FALSE	FALSE	FALSE	FALSE	1
SMC2	FALSE	FALSE	TRUE	FALSE	FALSE	FALSE	FALSE	FALSE	1
SMG5	FALSE	FALSE	FALSE	FALSE	TRUE	FALSE	FALSE	FALSE	1
SMG6	FALSE	FALSE	FALSE	FALSE	FALSE	FALSE	FALSE	TRUE	1
SMOC2	FALSE	FALSE	FALSE	FALSE	FALSE	FALSE	TRUE	FALSE	1
SMPD4	FALSE	FALSE	FALSE	FALSE	TRUE	FALSE	FALSE	FALSE	1
SMU1	FALSE	FALSE	FALSE	TRUE	FALSE	FALSE	FALSE	FALSE	1
SMYD2	FALSE	FALSE	FALSE	FALSE	TRUE	FALSE	FALSE	FALSE	1
SMYD3	FALSE	FALSE	FALSE	FALSE	TRUE	FALSE	FALSE	FALSE	1
SNAI2	FALSE	FALSE	FALSE	FALSE	TRUE	FALSE	FALSE	FALSE	1
SNAP25	FALSE	FALSE	FALSE	FALSE	TRUE	FALSE	FALSE	FALSE	1
SNAPC1	FALSE	FALSE	FALSE	FALSE	TRUE	FALSE	FALSE	FALSE	1
SNCA	FALSE	FALSE	FALSE	FALSE	TRUE	FALSE	FALSE	FALSE	1
SND1	FALSE	FALSE	FALSE	FALSE	TRUE	FALSE	FALSE	FALSE	1
SNIP1	FALSE	FALSE	FALSE	TRUE	FALSE	FALSE	FALSE	FALSE	1
SNRK	FALSE	FALSE	FALSE	FALSE	FALSE	FALSE	FALSE	TRUE	1
SNRNP40	FALSE	FALSE	FALSE	TRUE	FALSE	FALSE	FALSE	FALSE	1
SNRNP70	FALSE	FALSE	TRUE	FALSE	FALSE	FALSE	FALSE	FALSE	1
SNRPA	FALSE	FALSE	FALSE	TRUE	FALSE	FALSE	FALSE	FALSE	1
SNRPA1	FALSE	FALSE	FALSE	TRUE	FALSE	FALSE	FALSE	FALSE	1
SNRPB	FALSE	FALSE	FALSE	TRUE	FALSE	FALSE	FALSE	FALSE	1
SNRPB2	FALSE	FALSE	FALSE	FALSE	TRUE	FALSE	FALSE	FALSE	1
SNRPD3	FALSE	FALSE	FALSE	TRUE	FALSE	FALSE	FALSE	FALSE	1
SNRPE	FALSE	FALSE	FALSE	TRUE	FALSE	FALSE	FALSE	FALSE	1
SNU13	FALSE	FALSE	FALSE	TRUE	FALSE	FALSE	FALSE	FALSE	1
SNUPN	FALSE	FALSE	FALSE	FALSE	FALSE	FALSE	TRUE	FALSE	1
SNX3	FALSE	FALSE	FALSE	FALSE	TRUE	FALSE	FALSE	FALSE	1
SNX7	FALSE	FALSE	FALSE	FALSE	FALSE	FALSE	FALSE	TRUE	1
SNX9	FALSE	FALSE	FALSE	FALSE	TRUE	FALSE	FALSE	FALSE	1
SOCS4	FALSE	FALSE	FALSE	FALSE	FALSE	FALSE	FALSE	TRUE	1
SOD1	FALSE	FALSE	FALSE	FALSE	TRUE	FALSE	FALSE	FALSE	1
SON	FALSE	FALSE	TRUE	FALSE	FALSE	FALSE	FALSE	FALSE	1
SORBS1	FALSE	FALSE	FALSE	TRUE	FALSE	FALSE	FALSE	FALSE	1
SOX12	FALSE	FALSE	FALSE	FALSE	TRUE	FALSE	FALSE	FALSE	1
SOX13	FALSE	FALSE	FALSE	TRUE	FALSE	FALSE	FALSE	FALSE	1
SOX4	FALSE	FALSE	FALSE	FALSE	TRUE	FALSE	FALSE	FALSE	1
SOX9	FALSE	FALSE	FALSE	FALSE	TRUE	FALSE	FALSE	FALSE	1
SP1	FALSE	TRUE	FALSE	FALSE	FALSE	FALSE	FALSE	FALSE	1
SP140L	FALSE	FALSE	FALSE	TRUE	FALSE	FALSE	FALSE	FALSE	1
SPA17	FALSE	FALSE	FALSE	FALSE	TRUE	FALSE	FALSE	FALSE	1
SPARC	FALSE	FALSE	FALSE	FALSE	TRUE	FALSE	FALSE	FALSE	1
SPATA18	FALSE	FALSE	TRUE	FALSE	FALSE	FALSE	FALSE	FALSE	1
SPATA5	FALSE	FALSE	FALSE	TRUE	FALSE	FALSE	FALSE	FALSE	1
SPATA6	FALSE	FALSE	FALSE	FALSE	TRUE	FALSE	FALSE	FALSE	1
SPATS2L	FALSE	FALSE	FALSE	TRUE	FALSE	FALSE	FALSE	FALSE	1
SPC24	FALSE	FALSE	FALSE	FALSE	TRUE	FALSE	FALSE	FALSE	1
SPCS2	FALSE	FALSE	FALSE	FALSE	TRUE	FALSE	FALSE	FALSE	1
SPCS3	FALSE	FALSE	FALSE	FALSE	FALSE	FALSE	FALSE	TRUE	1
SPECC1L	FALSE	FALSE	FALSE	FALSE	TRUE	FALSE	FALSE	FALSE	1
SPG11	FALSE	FALSE	FALSE	FALSE	FALSE	FALSE	FALSE	TRUE	1
SPRED1	FALSE	FALSE	FALSE	FALSE	FALSE	FALSE	TRUE	FALSE	1
SPRED3	FALSE	FALSE	FALSE	FALSE	FALSE	FALSE	TRUE	FALSE	1
SPRY1	FALSE	FALSE	FALSE	FALSE	TRUE	FALSE	FALSE	FALSE	1
SPRYD7	FALSE	FALSE	FALSE	FALSE	TRUE	FALSE	FALSE	FALSE	1
SPTAN1	FALSE	FALSE	TRUE	FALSE	FALSE	FALSE	FALSE	FALSE	1
SPTBN1	FALSE	FALSE	TRUE	FALSE	FALSE	FALSE	FALSE	FALSE	1
SPTBN2	FALSE	FALSE	FALSE	FALSE	FALSE	FALSE	FALSE	TRUE	1
SQSTM1	FALSE	FALSE	FALSE	FALSE	TRUE	FALSE	FALSE	FALSE	1
SRCAP	FALSE	FALSE	FALSE	FALSE	TRUE	FALSE	FALSE	FALSE	1
SRD5A1	FALSE	FALSE	FALSE	FALSE	TRUE	FALSE	FALSE	FALSE	1
SRFBP1	FALSE	FALSE	FALSE	TRUE	FALSE	FALSE	FALSE	FALSE	1
SRI	FALSE	FALSE	FALSE	FALSE	FALSE	FALSE	FALSE	TRUE	1
SRP14	FALSE	FALSE	FALSE	TRUE	FALSE	FALSE	FALSE	FALSE	1
SRP19	FALSE	FALSE	FALSE	FALSE	TRUE	FALSE	FALSE	FALSE	1
SRP9	FALSE	FALSE	FALSE	TRUE	FALSE	FALSE	FALSE	FALSE	1
SRRM2	FALSE	FALSE	FALSE	FALSE	FALSE	FALSE	FALSE	TRUE	1
SRSF1	FALSE	FALSE	TRUE	FALSE	FALSE	FALSE	FALSE	FALSE	1
SRSF10	FALSE	FALSE	FALSE	TRUE	FALSE	FALSE	FALSE	FALSE	1
SRSF2	FALSE	FALSE	FALSE	FALSE	TRUE	FALSE	FALSE	FALSE	1
SRSF4	FALSE	FALSE	TRUE	FALSE	FALSE	FALSE	FALSE	FALSE	1
SRSF6	FALSE	FALSE	TRUE	FALSE	FALSE	FALSE	FALSE	FALSE	1
SSBP1	FALSE	FALSE	FALSE	TRUE	FALSE	FALSE	FALSE	FALSE	1
SSR2	FALSE	FALSE	FALSE	FALSE	TRUE	FALSE	FALSE	FALSE	1
SSRP1	FALSE	FALSE	TRUE	FALSE	FALSE	FALSE	FALSE	FALSE	1
SSSCA1	FALSE	FALSE	FALSE	FALSE	TRUE	FALSE	FALSE	FALSE	1
SSX4	FALSE	FALSE	FALSE	TRUE	FALSE	FALSE	FALSE	FALSE	1
STAT1	FALSE	FALSE	FALSE	FALSE	TRUE	FALSE	FALSE	FALSE	1
STAT6	FALSE	FALSE	FALSE	FALSE	TRUE	FALSE	FALSE	FALSE	1
STAU1	FALSE	FALSE	FALSE	TRUE	FALSE	FALSE	FALSE	FALSE	1
STAU2	FALSE	FALSE	FALSE	TRUE	FALSE	FALSE	FALSE	FALSE	1
STC1	FALSE	FALSE	FALSE	FALSE	TRUE	FALSE	FALSE	FALSE	1
STEAP3	FALSE	FALSE	FALSE	FALSE	TRUE	FALSE	FALSE	FALSE	1
STEAP4	FALSE	FALSE	FALSE	FALSE	FALSE	FALSE	FALSE	TRUE	1
STIM1	FALSE	FALSE	FALSE	FALSE	FALSE	FALSE	FALSE	TRUE	1
STK11	FALSE	FALSE	FALSE	FALSE	TRUE	FALSE	FALSE	FALSE	1
STK24	FALSE	FALSE	FALSE	FALSE	FALSE	FALSE	FALSE	TRUE	1
STRIP1	FALSE	FALSE	FALSE	FALSE	FALSE	FALSE	TRUE	FALSE	1
SUCLA2	FALSE	FALSE	FALSE	FALSE	TRUE	FALSE	FALSE	FALSE	1
SUCLG1	FALSE	FALSE	FALSE	FALSE	TRUE	FALSE	FALSE	FALSE	1
SVEP1	FALSE	FALSE	FALSE	FALSE	FALSE	FALSE	FALSE	TRUE	1
SYCE1L	FALSE	FALSE	FALSE	FALSE	TRUE	FALSE	FALSE	FALSE	1
SYDE1	FALSE	FALSE	FALSE	TRUE	FALSE	FALSE	FALSE	FALSE	1
TACR2	FALSE	FALSE	FALSE	FALSE	FALSE	FALSE	FALSE	TRUE	1
TAF11	FALSE	FALSE	FALSE	FALSE	FALSE	FALSE	FALSE	TRUE	1
TAF15	FALSE	FALSE	TRUE	FALSE	FALSE	FALSE	FALSE	FALSE	1
TAF3	FALSE	TRUE	FALSE	FALSE	FALSE	FALSE	FALSE	FALSE	1
TAF7	FALSE	FALSE	FALSE	FALSE	TRUE	FALSE	FALSE	FALSE	1
TAGLN2	FALSE	FALSE	FALSE	FALSE	TRUE	FALSE	FALSE	FALSE	1
TAOK2	FALSE	FALSE	FALSE	FALSE	TRUE	FALSE	FALSE	FALSE	1
TARDBP	FALSE	FALSE	FALSE	TRUE	FALSE	FALSE	FALSE	FALSE	1
TAX1BP1	FALSE	FALSE	FALSE	FALSE	TRUE	FALSE	FALSE	FALSE	1
TBC1D13	FALSE	FALSE	FALSE	FALSE	TRUE	FALSE	FALSE	FALSE	1
TBC1D14	FALSE	FALSE	FALSE	FALSE	TRUE	FALSE	FALSE	FALSE	1
TBC1D2	FALSE	FALSE	FALSE	FALSE	TRUE	FALSE	FALSE	FALSE	1
TBC1D22A	FALSE	FALSE	FALSE	FALSE	TRUE	FALSE	FALSE	FALSE	1
TBC1D4	FALSE	FALSE	FALSE	FALSE	TRUE	FALSE	FALSE	FALSE	1
TBCB	FALSE	FALSE	FALSE	FALSE	TRUE	FALSE	FALSE	FALSE	1
TBCE	FALSE	FALSE	FALSE	FALSE	TRUE	FALSE	FALSE	FALSE	1
TBK1	FALSE	FALSE	FALSE	TRUE	FALSE	FALSE	FALSE	FALSE	1
TBL3	FALSE	FALSE	TRUE	FALSE	FALSE	FALSE	FALSE	FALSE	1
TCEAL1	FALSE	FALSE	FALSE	FALSE	FALSE	FALSE	FALSE	TRUE	1
TCEAL7	FALSE	FALSE	FALSE	FALSE	TRUE	FALSE	FALSE	FALSE	1
TCF20	FALSE	FALSE	FALSE	FALSE	TRUE	FALSE	FALSE	FALSE	1
TCL1A	FALSE	FALSE	FALSE	FALSE	FALSE	FALSE	TRUE	FALSE	1
TDH	FALSE	FALSE	FALSE	TRUE	FALSE	FALSE	FALSE	FALSE	1
TEAD2	FALSE	FALSE	FALSE	FALSE	TRUE	FALSE	FALSE	FALSE	1
TELO2	FALSE	FALSE	FALSE	FALSE	TRUE	FALSE	FALSE	FALSE	1
TEX10	FALSE	FALSE	TRUE	FALSE	FALSE	FALSE	FALSE	FALSE	1
TEX264	FALSE	FALSE	FALSE	FALSE	TRUE	FALSE	FALSE	FALSE	1
TFAM	FALSE	FALSE	FALSE	TRUE	FALSE	FALSE	FALSE	FALSE	1
TFPI2	FALSE	FALSE	FALSE	FALSE	TRUE	FALSE	FALSE	FALSE	1
TGFB2	FALSE	FALSE	FALSE	FALSE	TRUE	FALSE	FALSE	FALSE	1
TGIF1	FALSE	TRUE	FALSE	FALSE	FALSE	FALSE	FALSE	FALSE	1
THAP10	FALSE	FALSE	FALSE	FALSE	TRUE	FALSE	FALSE	FALSE	1
THBS1	FALSE	FALSE	FALSE	FALSE	TRUE	FALSE	FALSE	FALSE	1
THEM6	FALSE	FALSE	FALSE	FALSE	TRUE	FALSE	FALSE	FALSE	1
THEMIS2	FALSE	FALSE	FALSE	FALSE	FALSE	FALSE	FALSE	TRUE	1
THOC5	FALSE	FALSE	FALSE	FALSE	FALSE	FALSE	FALSE	TRUE	1
THOC7	FALSE	FALSE	FALSE	FALSE	TRUE	FALSE	FALSE	FALSE	1
THRAP3	FALSE	FALSE	TRUE	FALSE	FALSE	FALSE	FALSE	FALSE	1
THYN1	FALSE	FALSE	FALSE	FALSE	TRUE	FALSE	FALSE	FALSE	1
TIA1	FALSE	FALSE	TRUE	FALSE	FALSE	FALSE	FALSE	FALSE	1
TIMM17A	FALSE	FALSE	FALSE	FALSE	TRUE	FALSE	FALSE	FALSE	1
TIPARP	FALSE	FALSE	FALSE	FALSE	FALSE	FALSE	FALSE	TRUE	1
TIPRL	FALSE	FALSE	FALSE	FALSE	TRUE	FALSE	FALSE	FALSE	1
TJAP1	FALSE	FALSE	FALSE	FALSE	TRUE	FALSE	FALSE	FALSE	1
TJP2	FALSE	FALSE	FALSE	FALSE	TRUE	FALSE	FALSE	FALSE	1
TK1	FALSE	FALSE	FALSE	FALSE	TRUE	FALSE	FALSE	FALSE	1
TLE1	FALSE	FALSE	FALSE	FALSE	TRUE	FALSE	FALSE	FALSE	1
TLR4	FALSE	FALSE	FALSE	FALSE	TRUE	FALSE	FALSE	FALSE	1
TLX2	FALSE	FALSE	FALSE	FALSE	TRUE	FALSE	FALSE	FALSE	1
TM2D2	FALSE	TRUE	FALSE	FALSE	FALSE	FALSE	FALSE	FALSE	1
TM4SF18	FALSE	FALSE	FALSE	FALSE	FALSE	FALSE	FALSE	TRUE	1
TM6SF1	FALSE	FALSE	FALSE	FALSE	FALSE	FALSE	FALSE	TRUE	1
TMA7	FALSE	FALSE	FALSE	FALSE	FALSE	FALSE	FALSE	TRUE	1
TMC5	FALSE	FALSE	FALSE	FALSE	FALSE	FALSE	FALSE	TRUE	1
TMCO1	FALSE	FALSE	FALSE	FALSE	TRUE	FALSE	FALSE	FALSE	1
TMED10	FALSE	FALSE	FALSE	FALSE	TRUE	FALSE	FALSE	FALSE	1
TMED2	FALSE	FALSE	FALSE	FALSE	TRUE	FALSE	FALSE	FALSE	1
TMED5	FALSE	FALSE	FALSE	FALSE	FALSE	FALSE	FALSE	TRUE	1
TMEM101	FALSE	FALSE	FALSE	FALSE	FALSE	FALSE	FALSE	TRUE	1
TMEM108	FALSE	FALSE	FALSE	FALSE	TRUE	FALSE	FALSE	FALSE	1
TMEM123	FALSE	FALSE	FALSE	FALSE	TRUE	FALSE	FALSE	FALSE	1
TMEM126A	FALSE	FALSE	FALSE	FALSE	FALSE	FALSE	FALSE	TRUE	1
TMEM143	FALSE	FALSE	FALSE	FALSE	FALSE	FALSE	FALSE	TRUE	1
TMEM156	FALSE	FALSE	FALSE	FALSE	TRUE	FALSE	FALSE	FALSE	1
TMEM179B	FALSE	FALSE	FALSE	FALSE	TRUE	FALSE	FALSE	FALSE	1
TMEM184B	FALSE	FALSE	FALSE	FALSE	TRUE	FALSE	FALSE	FALSE	1
TMEM201	FALSE	FALSE	FALSE	FALSE	TRUE	FALSE	FALSE	FALSE	1
TMEM205	FALSE	FALSE	FALSE	FALSE	TRUE	FALSE	FALSE	FALSE	1
TMEM214	FALSE	FALSE	FALSE	TRUE	FALSE	FALSE	FALSE	FALSE	1
TMEM25	FALSE	FALSE	FALSE	FALSE	TRUE	FALSE	FALSE	FALSE	1
TMEM44	FALSE	FALSE	FALSE	FALSE	FALSE	FALSE	FALSE	TRUE	1
TMEM50B	FALSE	FALSE	FALSE	FALSE	TRUE	FALSE	FALSE	FALSE	1
TMEM54	FALSE	FALSE	FALSE	FALSE	TRUE	FALSE	FALSE	FALSE	1
TMEM59	FALSE	FALSE	FALSE	FALSE	TRUE	FALSE	FALSE	FALSE	1
TMEM59L	FALSE	FALSE	FALSE	FALSE	TRUE	FALSE	FALSE	FALSE	1
TMEM88	FALSE	FALSE	FALSE	FALSE	TRUE	FALSE	FALSE	FALSE	1
TMEM8A	FALSE	FALSE	FALSE	FALSE	TRUE	FALSE	FALSE	FALSE	1
TMEM9B	FALSE	FALSE	FALSE	FALSE	TRUE	FALSE	FALSE	FALSE	1
TMSB15A	FALSE	FALSE	FALSE	FALSE	TRUE	FALSE	FALSE	FALSE	1
TMTC1	FALSE	FALSE	FALSE	FALSE	TRUE	FALSE	FALSE	FALSE	1
TMX2	FALSE	FALSE	FALSE	FALSE	TRUE	FALSE	FALSE	FALSE	1
TNFAIP6	FALSE	FALSE	FALSE	FALSE	TRUE	FALSE	FALSE	FALSE	1
TNFAIP8	FALSE	FALSE	FALSE	FALSE	TRUE	FALSE	FALSE	FALSE	1
TNFRSF11B	FALSE	FALSE	FALSE	FALSE	TRUE	FALSE	FALSE	FALSE	1
TNFRSF21	FALSE	FALSE	FALSE	FALSE	TRUE	FALSE	FALSE	FALSE	1
TNFSF12	FALSE	FALSE	FALSE	FALSE	TRUE	FALSE	FALSE	FALSE	1
TNNT1	FALSE	FALSE	FALSE	FALSE	TRUE	FALSE	FALSE	FALSE	1
TNPO2	FALSE	FALSE	FALSE	FALSE	TRUE	FALSE	FALSE	FALSE	1
TNRC18	FALSE	FALSE	FALSE	FALSE	FALSE	FALSE	TRUE	FALSE	1
TNRC6B	FALSE	FALSE	FALSE	FALSE	TRUE	FALSE	FALSE	FALSE	1
TOE1	FALSE	FALSE	FALSE	FALSE	FALSE	FALSE	FALSE	TRUE	1
TOM1	FALSE	FALSE	FALSE	FALSE	TRUE	FALSE	FALSE	FALSE	1
TOMM22	FALSE	FALSE	FALSE	FALSE	TRUE	FALSE	FALSE	FALSE	1
TONSL	FALSE	FALSE	FALSE	FALSE	TRUE	FALSE	FALSE	FALSE	1
TOP2A	FALSE	FALSE	TRUE	FALSE	FALSE	FALSE	FALSE	FALSE	1
TOP2B	FALSE	FALSE	TRUE	FALSE	FALSE	FALSE	FALSE	FALSE	1
TOP3A	FALSE	FALSE	FALSE	FALSE	TRUE	FALSE	FALSE	FALSE	1
TOP3B	FALSE	FALSE	FALSE	FALSE	TRUE	FALSE	FALSE	FALSE	1
TOR4A	FALSE	FALSE	FALSE	FALSE	TRUE	FALSE	FALSE	FALSE	1
TOX2	FALSE	FALSE	FALSE	FALSE	TRUE	FALSE	FALSE	FALSE	1
TP53I11	FALSE	FALSE	FALSE	FALSE	TRUE	FALSE	FALSE	FALSE	1
TPCN1	FALSE	FALSE	FALSE	FALSE	TRUE	FALSE	FALSE	FALSE	1
TPI1	FALSE	FALSE	FALSE	FALSE	FALSE	FALSE	FALSE	TRUE	1
TPM1	FALSE	FALSE	FALSE	FALSE	TRUE	FALSE	FALSE	FALSE	1
TPM2	FALSE	TRUE	FALSE	FALSE	FALSE	FALSE	FALSE	FALSE	1
TPM3	FALSE	FALSE	FALSE	FALSE	FALSE	FALSE	FALSE	TRUE	1
TPRKB	FALSE	FALSE	FALSE	FALSE	TRUE	FALSE	FALSE	FALSE	1
TRA2A	FALSE	FALSE	FALSE	TRUE	FALSE	FALSE	FALSE	FALSE	1
TRA2B	FALSE	FALSE	FALSE	TRUE	FALSE	FALSE	FALSE	FALSE	1
TRABD	FALSE	FALSE	FALSE	FALSE	TRUE	FALSE	FALSE	FALSE	1
TRAM1	FALSE	FALSE	FALSE	FALSE	TRUE	FALSE	FALSE	FALSE	1
[truncated: 16,357 more rows]
