# Supplementary material for: Multi-Omic Analysis of CIC’s Functional Networks Reveals Novel Interaction Partners and a Potential Role in Mitotic Fidelity
Source: Cancers (Basel). 2023 May 17;15(10):2805. doi: 10.3390/cancers15102805 (PMC10216487; doi:10.3390/cancers15102805)
Supplement: Supplementary file 1 [file cancers-15-02805-s001.zip › Supplemental_table_S7_scRNA_seq.xlsx]

## Sheet: S6a (G1_S)
Supplemental Table S7: scRNA-seq phase-specific DE results. a DE analysis results (DESeq2 output) comparing NHA-CICKO versus NHA-CICWT cells assigned to the G1/S phase. Base mean: mean of normalized counts for all samples. SE: standard error. Stat: Wald statistic. Adjusted p-values were obtained using the Benjamini-Hochberg method. Genes without adjusted p-values were filtered by automatic indepe…
gene name	ensembl ID	base mean	log2 fold-change	log fold-change SE	stat	p-value	adjusted p-value
THY1	ENSG00000154096	300.286	-9.71414	0.752993	-12.9007	4.4602e-38	5.71262e-34
TNNT1	ENSG00000105048	108.828	-3.95782	0.381919	-10.363	3.65411e-25	2.34009e-21
GYPC	ENSG00000136732	165.837	2.78036	0.279806	9.93673	2.8813e-23	1.23012e-19
TUBA1A	ENSG00000167552	160.447	-2.82435	0.306092	-9.22713	2.7798e-20	8.90094e-17
CPN1	ENSG00000120054	41.1777	-9.28109	1.06422	-8.721	2.75758e-18	7.06382e-15
RAB11FIP1	ENSG00000156675	32.3526	-4.34035	0.499578	-8.68803	3.68768e-18	7.87197e-15
TGFB2	ENSG00000092969	191.271	-2.04432	0.245175	-8.3382	7.54272e-17	1.3801e-13
ITGB8	ENSG00000105855	35.2159	-3.12567	0.375719	-8.31916	8.85872e-17	1.41828e-13
DSP	ENSG00000096696	31.959	-8.92372	1.09405	-8.15657	3.44685e-16	4.90526e-13
MYH10	ENSG00000133026	23.6178	-8.47736	1.09365	-7.75141	9.08756e-15	1.16394e-11
PEG10	ENSG00000242265	23.6477	-5.1835	0.673196	-7.69984	1.36237e-14	1.5863e-11
NREP	ENSG00000134986	128.363	-2.27961	0.301307	-7.56574	3.8565e-14	4.11617e-11
ETV4	ENSG00000175832	62.7712	2.54837	0.344527	7.39672	1.39592e-13	1.3753e-10
BLVRA	ENSG00000106605	27.2614	-6.64965	0.903119	-7.36298	1.79845e-13	1.64533e-10
NXN	ENSG00000167693	49.6012	-3.05213	0.423462	-7.20755	5.69666e-13	4.86419e-10
SLC7A11	ENSG00000151012	117.465	2.37756	0.330623	7.19115	6.42486e-13	5.1431e-10
ZFR2	ENSG00000105278	15.5961	-7.88438	1.10947	-7.10643	1.19084e-12	8.97195e-10
INHBA	ENSG00000122641	149.483	-2.77108	0.395969	-6.99822	2.59231e-12	1.84457e-09
RBP7	ENSG00000162444	20.3843	-3.5929	0.514217	-6.98714	2.80556e-12	1.89124e-09
DDB2	ENSG00000134574	119.378	-1.64645	0.236781	-6.95346	3.56428e-12	2.28256e-09
HIST1H1D	ENSG00000124575	38.2512	-2.98453	0.432616	-6.8988	5.2443e-12	3.19852e-09
BACE2	ENSG00000182240	13.6116	-7.68057	1.12437	-6.83098	8.43358e-12	4.90988e-09
TMEM205	ENSG00000105518	65.1649	-2.59749	0.381671	-6.80557	1.00653e-11	5.60506e-09
PAGE1	ENSG00000068985	14.6098	-7.77503	1.14645	-6.78185	1.18643e-11	6.33159e-09
RP3-512B11.3	ENSG00000261189	19.0064	-7.43036	1.10403	-6.73021	1.69419e-11	8.67966e-09
CBX6	ENSG00000183741	197.865	1.51254	0.226294	6.68397	2.32556e-11	1.14561e-08
SLC26A2	ENSG00000155850	91.471	-1.77577	0.267233	-6.64504	3.03127e-11	1.43794e-08
COMMD6	ENSG00000188243	1579.45	1.21473	0.185062	6.56393	5.2408e-11	2.39729e-08
CACNG8	ENSG00000142408	14.2499	-7.74133	1.1808	-6.55601	5.52651e-11	2.44081e-08
ADARB1	ENSG00000197381	16.4879	-3.96763	0.608549	-6.51983	7.03884e-11	3.00511e-08
TJP2	ENSG00000119139	151.355	1.36624	0.211018	6.47452	9.51138e-11	3.69157e-08
MGMT	ENSG00000170430	11.2716	-7.42146	1.14626	-6.47452	9.51128e-11	3.69157e-08
HN1	ENSG00000189159	1221.73	-1.04113	0.16057	-6.48394	8.93599e-11	3.69157e-08
MRAS	ENSG00000158186	14.4723	-4.42562	0.706657	-6.26276	3.78234e-10	1.42483e-07
MT1X	ENSG00000187193	381.497	-1.56002	0.249425	-6.25446	3.98887e-10	1.4597e-07
HPCAL1	ENSG00000115756	427.078	1.46029	0.233785	6.24629	4.20309e-10	1.49537e-07
C1orf106	ENSG00000163362	15.3553	-4.54999	0.736839	-6.17502	6.61553e-10	2.29005e-07
NPW	ENSG00000183971	13.7772	-4.88505	0.796531	-6.1329	8.62893e-10	2.9084e-07
DNAJC6	ENSG00000116675	18.0315	-3.28955	0.543015	-6.05793	1.37883e-09	4.52821e-07
NFIA	ENSG00000162599	12.1019	-6.78089	1.12695	-6.01701	1.77664e-09	5.68881e-07
RP4-555D20.2	ENSG00000261786	34.1548	-2.3893	0.400704	-5.96275	2.48031e-09	7.74826e-07
SBDS	ENSG00000126524	351.825	-1.16848	0.19727	-5.92324	3.15662e-09	9.6262e-07
FCGRT	ENSG00000104870	10.9388	-6.63714	1.13701	-5.83738	5.30267e-09	1.57945e-06
RP11-660L16.2	ENSG00000254682	85.7624	1.54312	0.264963	5.82391	5.74878e-09	1.67342e-06
CRABP2	ENSG00000143320	155.733	-1.69458	0.294461	-5.75485	8.67183e-09	2.4682e-06
LINC00704	ENSG00000231298	28.5221	3.13448	0.547182	5.7284	1.01383e-08	2.82285e-06
A1BG	ENSG00000121410	74.5035	-1.58545	0.278004	-5.70299	1.17723e-08	3.20808e-06
PLAU	ENSG00000122861	242.271	1.23121	0.216101	5.69738	1.21664e-08	3.24641e-06
TXNRD1	ENSG00000198431	758.928	1.62294	0.286798	5.65882	1.52414e-08	3.90423e-06
EEF1A2	ENSG00000101210	18.0832	-2.88556	0.509775	-5.66045	1.50974e-08	3.90423e-06
EVC	ENSG00000072840	161.068	1.90236	0.336815	5.6481	1.6223e-08	4.07419e-06
AP1B1	ENSG00000100280	137.439	1.45544	0.258192	5.63705	1.72983e-08	4.26072e-06
KISS1	ENSG00000170498	7.2527	-6.78089	1.20965	-5.60568	2.07433e-08	5.01285e-06
RPS19BP1	ENSG00000187051	1247.88	0.992263	0.177634	5.58599	2.32376e-08	5.51162e-06
FSTL1	ENSG00000163430	197.173	-1.3917	0.250358	-5.55883	2.7159e-08	6.32458e-06
AGPAT2	ENSG00000169692	85.9503	-2.44003	0.439999	-5.54553	2.93061e-08	6.70272e-06
MT1F	ENSG00000198417	11.6395	-5.39889	0.978485	-5.5176	3.43654e-08	7.72197e-06
ARID5B	ENSG00000150347	439.222	-1.21103	0.220192	-5.49988	3.80041e-08	8.39236e-06
RABL6	ENSG00000196642	476.184	0.99363	0.180774	5.49655	3.87298e-08	8.40765e-06
CSRP2	ENSG00000175183	325.478	-1.8461	0.337098	-5.47646	4.33916e-08	9.26265e-06
NLRP1	ENSG00000091592	431.107	-1.7374	0.318462	-5.4556	4.88066e-08	1.02478e-05
NOSIP	ENSG00000142546	307.251	-1.09541	0.201022	-5.44921	5.05932e-08	1.04516e-05
FAM129B	ENSG00000136830	340.302	1.10286	0.203339	5.42376	5.83589e-08	1.18645e-05
CTSD	ENSG00000117984	753.659	0.890166	0.164399	5.41466	6.14049e-08	1.19163e-05
KRTAP2-3	ENSG00000212724	20.3804	-3.83927	0.708799	-5.41659	6.07465e-08	1.19163e-05
PPM1F	ENSG00000100034	86.7921	1.54082	0.284396	5.41787	6.03125e-08	1.19163e-05
SNCA	ENSG00000145335	70.0812	2.11755	0.39129	5.41171	6.2426e-08	1.19336e-05
RTKN2	ENSG00000182010	36.2501	-1.89245	0.35099	-5.39175	6.97734e-08	1.3142e-05
CYTL1	ENSG00000170891	6.26951	-6.56243	1.21887	-5.38401	7.28457e-08	1.33295e-05
C22orf29	ENSG00000215012	99.8476	1.39978	0.259989	5.384	7.28504e-08	1.33295e-05
HMGA1	ENSG00000137309	4323.59	1.00743	0.187348	5.37735	7.559e-08	1.3636e-05
C12orf75	ENSG00000235162	1080.28	-1.07802	0.200689	-5.3716	7.80394e-08	1.38823e-05
OCIAD2	ENSG00000145247	535.565	-1.48209	0.276704	-5.35622	8.49818e-08	1.47867e-05
MYCBP2	ENSG00000005810	172.589	1.24171	0.231867	5.35526	8.5432e-08	1.47867e-05
PLP2	ENSG00000102007	839.867	-0.989443	0.184945	-5.34994	8.79824e-08	1.5025e-05
LINC00958	ENSG00000251381	11.5275	-5.9802	1.12113	-5.33409	9.60227e-08	1.61824e-05
RAB27B	ENSG00000041353	42.6136	2.05487	0.386768	5.31293	1.07878e-07	1.79442e-05
MARCKSL1	ENSG00000175130	348.822	-1.42967	0.269234	-5.31012	1.09553e-07	1.79891e-05
RGP1	ENSG00000107185	74.123	1.57609	0.297603	5.29596	1.18393e-07	1.91946e-05
SREBF2	ENSG00000198911	101.667	1.48709	0.281092	5.2904	1.22047e-07	1.95398e-05
HSPB1	ENSG00000106211	2582.72	-0.794053	0.150274	-5.28403	1.26371e-07	1.99822e-05
FBLN2	ENSG00000163520	52.6216	1.76951	0.335433	5.2753	1.32539e-07	2.048e-05
L3MBTL2	ENSG00000100395	62.5661	1.75599	0.332886	5.27505	1.32717e-07	2.048e-05
GNG11	ENSG00000127920	666.302	1.84186	0.350508	5.25483	1.48164e-07	2.25914e-05
MGARP	ENSG00000137463	78.2163	-1.94887	0.371344	-5.24814	1.53639e-07	2.28814e-05
TBC1D4	ENSG00000136111	67.135	1.55043	0.295342	5.24961	1.52418e-07	2.28814e-05
TLX2	ENSG00000115297	12.6768	-3.55296	0.681754	-5.2115	1.87323e-07	2.75774e-05
GPR56	ENSG00000205336	48.057	1.65591	0.318445	5.19999	1.99299e-07	2.9007e-05
G6PD	ENSG00000160211	260.949	1.06495	0.205056	5.19348	2.06401e-07	2.96233e-05
PLCE1-AS1	ENSG00000268894	10.291	-3.92947	0.756847	-5.1919	2.08159e-07	2.96233e-05
TMEM54	ENSG00000121900	223.597	-1.22427	0.236231	-5.18251	2.18918e-07	3.08121e-05
ANP32E	ENSG00000143401	179.882	-1.03546	0.200995	-5.15166	2.58185e-07	3.59439e-05
PYGB	ENSG00000100994	229.313	1.08264	0.210545	5.14208	2.7172e-07	3.74214e-05
TTLL12	ENSG00000100304	91.1047	1.56411	0.30481	5.13141	2.87586e-07	3.91852e-05
TMBIM1	ENSG00000135926	98.1381	1.2071	0.23574	5.12048	3.04767e-07	4.03184e-05
MDK	ENSG00000110492	504.052	-1.20602	0.235545	-5.12012	3.05347e-07	4.03184e-05
CSNK1E	ENSG00000213923	265.624	1.14143	0.22284	5.12217	3.02036e-07	4.03184e-05
PCDH9	ENSG00000184226	20.1921	2.87116	0.563778	5.09271	3.52975e-07	4.61317e-05
GMPR	ENSG00000137198	62.8912	1.66475	0.32702	5.09067	3.56794e-07	4.61598e-05
NUP188	ENSG00000095319	131.107	1.24583	0.244864	5.08784	3.6216e-07	4.6283e-05
TRIOBP	ENSG00000100106	178.062	1.27433	0.250538	5.08637	3.64974e-07	4.6283e-05
SH3GLB2	ENSG00000148341	115.769	1.12271	0.221573	5.067	4.04127e-07	5.07457e-05
LARP6	ENSG00000166173	414.701	0.94792	0.187318	5.06049	4.18187e-07	5.20013e-05
GPX8	ENSG00000164294	197.075	-1.11606	0.221982	-5.02769	4.96417e-07	6.05534e-05
CARD10	ENSG00000100065	63.5229	1.57663	0.313586	5.02773	4.96316e-07	6.05534e-05
PSMC4	ENSG00000013275	321.977	-1.19057	0.237445	-5.01409	5.32843e-07	6.43835e-05
LMF2	ENSG00000100258	139.714	1.31653	0.263507	4.99617	5.84815e-07	7.00029e-05
SERINC2	ENSG00000168528	9.46416	-4.33786	0.869699	-4.98777	6.10809e-07	7.11204e-05
HIST1H2BK	ENSG00000197903	442.848	1.22383	0.245267	4.9898	6.04431e-07	7.11204e-05
PLXNB2	ENSG00000196576	143.278	1.26809	0.254152	4.98949	6.05404e-07	7.11204e-05
EFEMP1	ENSG00000115380	93.9997	-1.28711	0.260055	-4.94937	7.44542e-07	8.59108e-05
GUCD1	ENSG00000138867	135.757	1.22638	0.249314	4.91901	8.6981e-07	9.9469e-05
PSCA	ENSG00000167653	97.8665	1.98424	0.404781	4.90202	9.48566e-07	0.000107515
SSR2	ENSG00000163479	755.807	-0.885383	0.18081	-4.89675	9.74328e-07	0.000109467
HHIP	ENSG00000164161	364.594	-1.18908	0.243563	-4.88204	1.04991e-06	0.000116933
ZC3H7B	ENSG00000100403	197.971	1.41369	0.291485	4.84996	1.23488e-06	0.000136347
CHCHD5	ENSG00000125611	248.053	0.890256	0.183766	4.8445	1.26929e-06	0.00013895
GBAS	ENSG00000146729	142.773	-1.29128	0.266651	-4.84258	1.28162e-06	0.00013911
SDC2	ENSG00000169439	136.593	-1.68818	0.349223	-4.8341	1.33752e-06	0.000143958
RCAN1	ENSG00000159200	32.1058	-1.84967	0.382854	-4.83127	1.35663e-06	0.000144797
TPM1	ENSG00000140416	2638.01	-0.926828	0.191945	-4.8286	1.37496e-06	0.000145541
SGCB	ENSG00000163069	122.956	-1.1735	0.243578	-4.81778	1.45165e-06	0.000151564
CDK2AP2	ENSG00000167797	173.155	-1.06328	0.220724	-4.81725	1.45553e-06	0.000151564
SEPT7	ENSG00000122545	396.977	-1.36054	0.283621	-4.79703	1.61037e-06	0.000165005
FAM207A	ENSG00000160256	213.528	-0.996294	0.207689	-4.79705	1.61022e-06	0.000165005
ASCC2	ENSG00000100325	95.337	1.24664	0.259989	4.79497	1.62697e-06	0.000165383
PSAP	ENSG00000197746	795.447	0.872684	0.182259	4.78814	1.68332e-06	0.000169763
PLEC	ENSG00000178209	288.77	1.19301	0.249301	4.78543	1.70624e-06	0.000170731
QPCT	ENSG00000115828	58.2002	-1.90977	0.399489	-4.78053	1.74837e-06	0.00017359
TEAD2	ENSG00000074219	4.66429	-6.1278	1.2835	-4.77427	1.8036e-06	0.000177696
ADAMTSL1	ENSG00000178031	56.71	1.48858	0.311958	4.77173	1.82648e-06	0.000178577
KCTD12	ENSG00000178695	27.7542	2.58814	0.543204	4.76458	1.89249e-06	0.000183629
CYB5R3	ENSG00000100243	427.109	0.894186	0.187834	4.76052	1.93098e-06	0.000185955
RANGAP1	ENSG00000100401	190.548	1.48159	0.311343	4.7587	1.94839e-06	0.000186231
TBC1D2	ENSG00000095383	76.5022	1.32756	0.27908	4.75692	1.96571e-06	0.000186495
TIPRL	ENSG00000143155	120.822	-1.13545	0.239187	-4.7471	2.06353e-06	0.000193913
C22orf39	ENSG00000242259	222.216	0.92338	0.194557	4.74606	2.07418e-06	0.000193913
CD164	ENSG00000135535	242.474	-1.05382	0.222374	-4.73897	2.14806e-06	0.000199365
DLL3	ENSG00000090932	73.9956	-1.25205	0.264417	-4.73512	2.18927e-06	0.000201728
ENTPD6	ENSG00000197586	104.569	1.19307	0.252308	4.72863	2.26041e-06	0.000206796
TUBB2A	ENSG00000137267	58.336	-1.75334	0.371986	-4.71347	2.43529e-06	0.000221214
TMEM184B	ENSG00000198792	105.189	1.13731	0.241868	4.70219	2.57387e-06	0.000232156
MCM5	ENSG00000100297	304.751	0.844881	0.180519	4.6803	2.86457e-06	0.00025657
DUSP23	ENSG00000158716	142.901	-3.55383	0.762121	-4.66308	3.11508e-06	0.000273336
PPP2R2B	ENSG00000156475	23.1986	3.2858	0.704648	4.66304	3.11579e-06	0.000273336
LINC00839	ENSG00000185904	68.0654	-1.36853	0.293335	-4.66543	3.07966e-06	0.000273336
PSMA2_ENSG00000106588	ENSG00000106588	444.51	-1.14359	0.246221	-4.64457	3.40781e-06	0.00029692
DESI1	ENSG00000100418	305.897	0.905633	0.195792	4.62549	3.73716e-06	0.000323416
AIM1	ENSG00000112297	54.7677	1.35701	0.294008	4.61557	3.9202e-06	0.00033698
GABRE	ENSG00000102287	20.5101	2.73263	0.592999	4.60816	4.06256e-06	0.000346889
DERL2	ENSG00000072849	235.25	-1.11859	0.243183	-4.5998	4.22902e-06	0.00035871
CHRNA6	ENSG00000147434	13.5298	-2.83828	0.617603	-4.59564	4.31424e-06	0.000363532
MLTK	ENSG00000091436	173.079	1.04819	0.228308	4.59111	4.40889e-06	0.000366682
CBR3	ENSG00000159231	160.982	-1.0817	0.235546	-4.59231	4.38357e-06	0.000366682
EGFL7	ENSG00000172889	10.9709	-3.05546	0.665756	-4.58946	4.44399e-06	0.000367217
CCT6A	ENSG00000146731	1191.17	-1.01109	0.22052	-4.58501	4.53956e-06	0.000370336
SBF1	ENSG00000100241	52.2123	1.53607	0.335016	4.58506	4.53848e-06	0.000370336
KRT81	ENSG00000205426	34.422	-1.9681	0.430794	-4.56855	4.91111e-06	0.000397069
RAMP2	ENSG00000131477	7.59414	-4.72795	1.03507	-4.56778	4.92926e-06	0.000397069
COL8A1	ENSG00000144810	68.4428	-1.47866	0.324031	-4.56332	5.03512e-06	0.00040064
PRKAG2	ENSG00000106617	80.4598	1.26325	0.276829	4.56328	5.03615e-06	0.00040064
LY6K	ENSG00000160886	103.409	1.09705	0.240759	4.55665	5.19749e-06	0.00041021
JAM3	ENSG00000166086	7.28478	-5.3032	1.16407	-4.55573	5.2205e-06	0.00041021
CPA4	ENSG00000128510	465.135	0.784814	0.17262	4.54649	5.45471e-06	0.000426
CRBN	ENSG00000113851	88.1896	-1.17186	0.2583	-4.53681	5.71109e-06	0.000442228
RAB31	ENSG00000168461	168.231	1.01194	0.223103	4.53578	5.7392e-06	0.000442228
PACSIN2	ENSG00000100266	126.875	0.973478	0.214669	4.53479	5.7661e-06	0.000442228
SNAP25	ENSG00000132639	19.1539	3.07554	0.67933	4.52731	5.9738e-06	0.000455431
GLIPR1	ENSG00000139278	594.461	-0.873143	0.193017	-4.52367	6.07769e-06	0.000460609
MTFP1	ENSG00000242114	120.24	1.41651	0.313722	4.51518	6.32641e-06	0.000476639
BATF3	ENSG00000123685	40.0886	-1.43131	0.317212	-4.51215	6.41746e-06	0.000477877
WNT5A	ENSG00000114251	3.9678	-5.90491	1.30832	-4.51334	6.38146e-06	0.000477877
SEPT9	ENSG00000184640	281.241	0.89461	0.198692	4.50249	6.71604e-06	0.00049722
C9orf89	ENSG00000165233	257.715	1.1528	0.256333	4.49727	6.88302e-06	0.000503758
SPHK1	ENSG00000176170	167.598	1.25757	0.279578	4.49811	6.85614e-06	0.000503758
IGFBP3	ENSG00000146674	83.9918	-2.07365	0.461371	-4.49453	6.97229e-06	0.000505428
KRT17	ENSG00000128422	3.91277	-5.88877	1.31032	-4.49415	6.98476e-06	0.000505428
LPCAT1	ENSG00000153395	55.8013	1.34565	0.299523	4.49264	7.03455e-06	0.000506171
LAPTM4A	ENSG00000068697	471.961	-1.27079	0.283941	-4.47555	7.62142e-06	0.000545336
RP11-395G23.3	ENSG00000254615	79.7596	1.30348	0.291823	4.4667	7.94351e-06	0.000565225
CREG1	ENSG00000143162	7.82623	-3.76584	0.84416	-4.46105	8.15581e-06	0.000577125
STK11	ENSG00000118046	69.3511	1.17033	0.262729	4.4545	8.40904e-06	0.000591775
PRMT1	ENSG00000126457	483.841	-0.953668	0.214373	-4.44864	8.64142e-06	0.000604805
VSTM1	ENSG00000189068	4.39894	-6.04088	1.35859	-4.44642	8.73127e-06	0.000607772
TMED2	ENSG00000086598	621.075	-0.678316	0.152679	-4.44275	8.88153e-06	0.000608313
ACOT4	ENSG00000177465	12.0844	-2.81632	0.633762	-4.44381	8.8378e-06	0.000608313
KIAA1199	ENSG00000103888	166.505	-1.82631	0.411067	-4.44284	8.87803e-06	0.000608313
GOLGA2	ENSG00000167110	183.766	1.09879	0.247582	4.43807	9.07676e-06	0.000618378
HES1	ENSG00000114315	86.1863	-1.289	0.290611	-4.4355	9.18601e-06	0.00062251
SOX4	ENSG00000124766	46.0474	-4.28805	0.967723	-4.43107	9.37659e-06	0.000632081
SCO2	ENSG00000130489	292.642	0.790439	0.178549	4.427	9.55519e-06	0.000640748
SPEG	ENSG00000072195	75.6693	1.38217	0.312621	4.42125	9.81337e-06	0.000651504
SOX9	ENSG00000125398	18.7784	2.48831	0.562819	4.42116	9.81733e-06	0.000651504
TXNDC12	ENSG00000117862	245.83	-0.894935	0.202948	-4.40967	1.03528e-05	0.000673087
ETNK2	ENSG00000143845	4.05522	-5.92027	1.34237	-4.41032	1.03219e-05	0.000673087
CD27-AS1	ENSG00000215039	62.3851	1.27059	0.288075	4.41062	1.03076e-05	0.000673087
TPCN1	ENSG00000186815	108.67	1.28496	0.291183	4.41289	1.01999e-05	0.000673087
AC005307.1	ENSG00000260725	3.77815	-5.83545	1.32475	-4.40496	1.05806e-05	0.000684423
TWISTNB	ENSG00000105849	100.831	-1.12585	0.255774	-4.40173	1.07391e-05	0.000691186
ISOC2	ENSG00000063241	307.594	-0.794597	0.180636	-4.39887	1.08814e-05	0.000696846
ANKRD29	ENSG00000154065	20.0245	2.32361	0.529009	4.39239	1.12112e-05	0.000714391
STAT1	ENSG00000115415	74.862	-1.35368	0.308804	-4.38363	1.16719e-05	0.000740068
POPDC3	ENSG00000132429	45.5565	1.82115	0.416502	4.37249	1.22837e-05	0.000775022
PES1	ENSG00000100029	182.34	1.0893	0.249257	4.3702	1.24135e-05	0.000779371
FAM89A	ENSG00000182118	9.34418	-3.59616	0.82403	-4.36412	1.27637e-05	0.000785947
ADSS	ENSG00000035687	95.5964	-1.12215	0.257	-4.36635	1.26343e-05	0.000785947
ESYT2	ENSG00000117868	83.2648	1.18998	0.27262	4.36497	1.27142e-05	0.000785947
TLE1	ENSG00000196781	55.3203	1.50223	0.344131	4.36529	1.26955e-05	0.000785947
TRAM1	ENSG00000067167	295.033	-0.99254	0.227782	-4.35741	1.31611e-05	0.000806544
ANXA10	ENSG00000109511	22.7006	2.0563	0.47211	4.35555	1.32731e-05	0.000808529
CTHRC1	ENSG00000164932	75.1565	-1.35225	0.310669	-4.35272	1.3446e-05	0.000808529
LITAF	ENSG00000189067	103.722	-1.09874	0.252326	-4.35445	1.33404e-05	0.000808529
CERK	ENSG00000100422	95.45	1.18101	0.271292	4.3533	1.34106e-05	0.000808529
PDE4DIP	ENSG00000178104	133.293	0.935639	0.215105	4.34968	1.36334e-05	0.000812172
DPYSL4	ENSG00000151640	3.951	-5.88905	1.35385	-4.34986	1.36227e-05	0.000812172
ACO1	ENSG00000122729	154.412	1.14464	0.263283	4.34756	1.37659e-05	0.000815055
PVRL2	ENSG00000130202	62.7467	-1.31547	0.302624	-4.34687	1.38091e-05	0.000815055
LRP3	ENSG00000130881	4.91398	-5.44974	1.25933	-4.32748	1.50825e-05	0.00088613
RALA	ENSG00000006451	244.231	-1.04554	0.242457	-4.31227	1.61585e-05	0.000945014
NES	ENSG00000132688	10.0937	-2.88399	0.669439	-4.30807	1.64685e-05	0.000957077
ETHE1	ENSG00000105755	212.818	-1.2974	0.301198	-4.30746	1.65142e-05	0.000957077
SQSTM1	ENSG00000161011	1096.7	0.684667	0.159195	4.3008	1.70183e-05	0.00098185
MIEF1	ENSG00000100335	77.4863	1.26488	0.295111	4.2861	1.81837e-05	0.00104438
XIST	ENSG00000229807	3.52569	-5.74224	1.34077	-4.28281	1.84551e-05	0.00105524
PPP2R4	ENSG00000119383	186.544	1.03501	0.24184	4.27971	1.87136e-05	0.00106526
TRIM16L	ENSG00000108448	139.794	1.12866	0.264179	4.27232	1.93453e-05	0.00109635
DMKN	ENSG00000161249	6.20589	-5.05406	1.18509	-4.26472	2.00149e-05	0.0011293
PIM3	ENSG00000198355	100.942	1.29184	0.303275	4.25962	2.0477e-05	0.00115031
TMEM156	ENSG00000121895	213.203	-0.944552	0.222225	-4.25044	2.13355e-05	0.0011933
SLFN5	ENSG00000166750	55.816	1.57827	0.372278	4.2395	2.24021e-05	0.0012475
MEG3	ENSG00000214548	6.75475	-5.1542	1.21649	-4.23694	2.26584e-05	0.00125631
CLEC11A	ENSG00000105472	41.9715	-1.60786	0.379992	-4.2313	2.32346e-05	0.00128271
RRP15	ENSG00000067533	124.061	-1.19641	0.283079	-4.22644	2.37422e-05	0.00129806
VARS	ENSG00000204394	120.024	1.04312	0.246806	4.22648	2.37374e-05	0.00129806
ABLIM1	ENSG00000099204	48.642	1.4656	0.346828	4.22573	2.38166e-05	0.00129806
DVL1	ENSG00000107404	94.6143	1.14724	0.271702	4.22243	2.41681e-05	0.00131163
BGN	ENSG00000182492	176.458	-1.60507	0.381718	-4.20487	2.61238e-05	0.00141179
TMEM59L	ENSG00000105696	9.99348	-2.9413	0.70009	-4.20132	2.65366e-05	0.00142807
LOXL3	ENSG00000115318	143.886	-1.49428	0.356046	-4.19688	2.70616e-05	0.00143965
AIMP2	ENSG00000106305	179.503	-1.0807	0.257571	-4.19571	2.72014e-05	0.00143965
HPS1	ENSG00000107521	301.626	0.824448	0.196457	4.19658	2.7098e-05	0.00143965
SPECC1L	ENSG00000100014	78.4186	1.35383	0.3225	4.19793	2.69371e-05	0.00143965
PTX3	ENSG00000163661	40.0807	1.72236	0.411043	4.19022	2.7868e-05	0.00146321
NDP	ENSG00000124479	7.10081	5.78747	1.3812	4.19017	2.78749e-05	0.00146321
MAFF	ENSG00000185022	81.8001	1.46965	0.351079	4.18609	2.83801e-05	0.00148364
TROVE2	ENSG00000116747	77.0788	-1.07989	0.258438	-4.17851	2.93431e-05	0.00152775
AMPH	ENSG00000078053	43.5415	-1.85031	0.444011	-4.16727	3.08269e-05	0.00159851
NDFIP1	ENSG00000131507	112.256	-1.06564	0.255795	-4.16601	3.09978e-05	0.00160089
IGFBP7	ENSG00000163453	2635.23	-1.53372	0.368445	-4.16268	3.14528e-05	0.00161139
MZT1	ENSG00000204899	361.207	0.806153	0.193641	4.16313	3.13909e-05	0.00161139
IGF2R	ENSG00000197081	108.508	1.00289	0.241451	4.15359	3.27292e-05	0.0016701
GADD45B	ENSG00000099860	192.322	-1.01525	0.244626	-4.15021	3.32171e-05	0.00168827
COL13A1	ENSG00000197467	48.8016	1.65694	0.399358	4.149	3.33927e-05	0.00169049
DOK1	ENSG00000115325	114.036	-1.08191	0.260919	-4.14653	3.37553e-05	0.00170212
RP11-284F21.10	ENSG00000272405	20.2451	2.84914	0.687768	4.14258	3.43414e-05	0.00171814
PPIC	ENSG00000168938	257.716	-1.26514	0.305362	-4.1431	3.42643e-05	0.00171814
ZDHHC7	ENSG00000153786	96.7456	1.02896	0.248566	4.13958	3.47942e-05	0.00173402
CLTB	ENSG00000175416	562.967	-0.660749	0.159903	-4.13218	3.59331e-05	0.00177467
SCARA3	ENSG00000168077	105.86	1.02984	0.24921	4.13241	3.58982e-05	0.00177467
CARS2	ENSG00000134905	181.947	1.00469	0.243172	4.1316	3.60254e-05	0.00177467
NDUFS4	ENSG00000164258	463.352	-1.12312	0.272002	-4.12908	3.6422e-05	0.00178733
LUZP2	ENSG00000187398	33.901	-2.03	0.492849	-4.11891	3.80668e-05	0.00186091
SMDT1	ENSG00000183172	595.722	0.885022	0.214923	4.11786	3.82405e-05	0.0018623
HPS4	ENSG00000100099	45.5738	1.47217	0.358213	4.10974	3.96099e-05	0.00192168
RP4-555D20.4	ENSG00000272121	36.3532	-1.3402	0.326561	-4.10398	4.06102e-05	0.00196277
EPB41L2	ENSG00000079819	119.972	0.975972	0.237939	4.10178	4.0998e-05	0.00197407
CLN6	ENSG00000128973	96.1703	0.995205	0.242839	4.09821	4.16352e-05	0.00198375
LPCAT2	ENSG00000087253	64.5084	-1.19188	0.29078	-4.0989	4.15113e-05	0.00198375
MPP2	ENSG00000108852	4.26981	-5.25064	1.28125	-4.09805	4.16638e-05	0.00198375
VAMP5	ENSG00000168899	4.24082	-5.23598	1.27805	-4.09685	4.18802e-05	0.00198667
RRP7A	ENSG00000189306	472.815	0.673826	0.164673	4.09191	4.27841e-05	0.00202206
BCR	ENSG00000186716	65.0965	1.23333	0.301851	4.08589	4.39083e-05	0.00206757
PI4KA	ENSG00000241973	61.7873	1.18109	0.289555	4.07898	4.52336e-05	0.00212217
PPARG	ENSG00000132170	30.1295	1.57731	0.386873	4.07706	4.56084e-05	0.00212419
DKFZP761J1410	ENSG00000105520	16.3414	-1.93757	0.47521	-4.07729	4.55637e-05	0.00212419
EXOSC7	ENSG00000075914	186.025	-0.947152	0.232557	-4.07278	4.64547e-05	0.00214026
CLUH	ENSG00000132361	70.1811	1.22965	0.30191	4.07291	4.64291e-05	0.00214026
EEF2	ENSG00000167658	2259.86	0.620126	0.152207	4.07423	4.61675e-05	0.00214026
ILF2	ENSG00000143621	404.077	-0.890578	0.219125	-4.06424	4.81892e-05	0.0021999
RNF130	ENSG00000113269	57.7147	-1.64845	0.405596	-4.06427	4.81824e-05	0.0021999
WBSCR22	ENSG00000071462	353.393	-0.842064	0.207207	-4.06388	4.82645e-05	0.0021999
PMP22	ENSG00000109099	34.7503	-1.39481	0.343455	-4.0611	4.88424e-05	0.00221835
AKR1B10	ENSG00000198074	13.0608	3.84993	0.94963	4.05414	5.03194e-05	0.00227735
GSTM4	ENSG00000168765	9.03821	-2.69045	0.664645	-4.04796	5.16665e-05	0.00232021
CAV2	ENSG00000105971	611.989	0.716597	0.177041	4.04762	5.17406e-05	0.00232021
NUDT2	ENSG00000164978	145.728	0.910202	0.224891	4.04731	5.18097e-05	0.00232021
COPS4	ENSG00000138663	97.2842	-1.54308	0.382126	-4.03815	5.38753e-05	0.00239596
RBM7	ENSG00000076053	79.197	-1.27034	0.314578	-4.03822	5.38576e-05	0.00239596
PON2	ENSG00000105854	136.75	-0.853886	0.211606	-4.03527	5.45407e-05	0.00241715
CPE	ENSG00000109472	17.0385	-1.90055	0.471283	-4.03272	5.5135e-05	0.00243507
MFAP2	ENSG00000117122	43.3886	-1.31619	0.326618	-4.02976	5.58327e-05	0.0024468
CBX3	ENSG00000122565	775.884	-0.952715	0.236501	-4.02837	5.61649e-05	0.0024468
GGCT	ENSG00000006625	483.019	-0.981603	0.243606	-4.02946	5.5904e-05	0.0024468
PXN	ENSG00000089159	120.593	0.929346	0.230669	4.02891	5.60365e-05	0.0024468
PSMD8	ENSG00000099341	831.211	-0.687647	0.170884	-4.02406	5.72023e-05	0.00248355
HSP90AA1	ENSG00000080824	2081.03	-0.881845	0.219279	-4.02157	5.78125e-05	0.00250156
KCNQ1OT1	ENSG00000269821	58.2529	-1.12372	0.279493	-4.02057	5.80578e-05	0.00250372
SAMSN1	ENSG00000155307	6.6387	5.70711	1.4224	4.01232	6.01255e-05	0.00258419
PITPNM3	ENSG00000091622	17.6438	2.33563	0.582742	4.008	6.12364e-05	0.00262313
EDN1	ENSG00000078401	115.499	-1.7186	0.428934	-4.00668	6.15779e-05	0.00262897
UBE2E2	ENSG00000182247	120.806	-0.967243	0.241469	-4.00565	6.18464e-05	0.00263165
C1orf198	ENSG00000119280	55.7366	-1.26077	0.314858	-4.00426	6.22116e-05	0.00263843
SBNO2	ENSG00000064932	44.4143	1.35732	0.339173	4.00185	6.2848e-05	0.00265662
TMCC1-AS1	ENSG00000271270	35.0094	1.51111	0.378708	3.99017	6.60269e-05	0.00278182
UBA2	ENSG00000126261	111.052	-0.925245	0.232004	-3.98806	6.66152e-05	0.0027974
ACO2	ENSG00000100412	133.295	0.914418	0.229538	3.98374	6.78401e-05	0.00283953
MATN3	ENSG00000132031	5.35251	-4.85503	1.21944	-3.98137	6.85189e-05	0.0028586
POLR3H	ENSG00000100413	340.709	0.722775	0.181625	3.97948	6.90652e-05	0.00287204
TNFRSF11B	ENSG00000164761	11.1672	-2.42468	0.609614	-3.9774	6.9672e-05	0.00288313
UBTF	ENSG00000108312	167.302	0.81924	0.205993	3.97703	6.97821e-05	0.00288313
LAMP1	ENSG00000185896	549.8	0.671661	0.169082	3.9724	7.11515e-05	0.00293025
CHMP4C	ENSG00000164695	4.01311	-5.14626	1.29646	-3.96946	7.20357e-05	0.00295716
MAPK12	ENSG00000188130	80.4353	1.01936	0.257005	3.9663	7.29961e-05	0.00298701
NR0B1	ENSG00000169297	12.1649	4.08408	1.02991	3.96546	7.32543e-05	0.00298803
TOP3B	ENSG00000100038	28.6836	1.63275	0.412125	3.96178	7.43929e-05	0.00302484
ANXA4	ENSG00000196975	52.1489	-1.19489	0.302019	-3.95634	7.61066e-05	0.00308472
PSTK	ENSG00000179988	93.1568	-1.16625	0.295228	-3.95036	7.80349e-05	0.0031529
TMEM108	ENSG00000144868	3.32638	-5.63518	1.42737	-3.94794	7.88269e-05	0.00316715
JOSD1	ENSG00000100221	99.474	1.17474	0.29757	3.94777	7.88819e-05	0.00316715
SLC20A1	ENSG00000144136	201.365	1.05828	0.268267	3.94487	7.98438e-05	0.00319575
RXRA	ENSG00000186350	95.7618	0.956469	0.242653	3.94172	8.09009e-05	0.00322797
FH	ENSG00000091483	174.262	-1.15544	0.293259	-3.94001	8.14789e-05	0.00323093
ETV5	ENSG00000244405	96.6901	0.946288	0.240174	3.94001	8.14797e-05	0.00323093
CAPG	ENSG00000042493	4.25384	-5.25185	1.33485	-3.93442	8.33969e-05	0.00329675
TNFRSF1A	ENSG00000067182	321.572	0.698864	0.177862	3.92925	8.52125e-05	0.00335816
RTN3	ENSG00000133318	214.778	-0.988264	0.25169	-3.92651	8.61866e-05	0.00338613
UAP1	ENSG00000117143	203.25	-1.00362	0.25592	-3.92159	8.79648e-05	0.00341843
CMTM6	ENSG00000091317	153.864	-0.819784	0.208945	-3.92345	8.72889e-05	0.00341843
NELFB	ENSG00000188986	149.166	0.903443	0.230394	3.92129	8.80765e-05	0.00341843
KLF12	ENSG00000118922	52.928	1.26377	0.322186	3.92249	8.76371e-05	0.00341843
MIF	ENSG00000240972	1796.36	0.843894	0.215585	3.91444	9.06137e-05	0.00350629
TAF7	ENSG00000178913	76.2633	-1.17522	0.300412	-3.91204	9.15209e-05	0.00353072
DDX54	ENSG00000123064	205.091	0.855301	0.218823	3.90865	9.28137e-05	0.00356984
SND1	ENSG00000197157	143.031	0.860393	0.220502	3.90198	9.54093e-05	0.00363691
CD59	ENSG00000085063	1286.06	-0.83296	0.213413	-3.90305	9.49879e-05	0.00363691
MIS18A	ENSG00000159055	64.981	-1.20307	0.308312	-3.90211	9.53574e-05	0.00363691
MEST	ENSG00000106484	35.0281	-1.38918	0.357117	-3.88998	0.000100254	0.00379899
SUGP2	ENSG00000064607	93.9166	1.09201	0.280721	3.89003	0.000100234	0.00379899
C9orf116	ENSG00000160345	30.7966	-1.47498	0.380423	-3.8772	0.000105664	0.00398882
KLF13	ENSG00000169926	2.97554	-5.4858	1.41507	-3.87669	0.000105887	0.00398882
SPARC	ENSG00000113140	1187.83	-0.81609	0.210553	-3.87593	0.000106217	0.00398952
FOXRED2	ENSG00000100350	57.4975	1.27735	0.329677	3.87457	0.000106815	0.00400026
LZTFL1	ENSG00000163818	13.7053	-1.95764	0.505567	-3.87217	0.000107869	0.00402795
PKN1	ENSG00000123143	127.397	0.978494	0.252961	3.86816	0.00010966	0.00408293
GGA1	ENSG00000100083	77.1926	1.11575	0.288562	3.86658	0.000110374	0.00409761
NCAPH2	ENSG00000025770	117.687	0.952077	0.246419	3.86365	0.000111704	0.00413497
SF3B4	ENSG00000143368	149.789	-0.935091	0.242201	-3.86081	0.000113011	0.00417131
C5orf30	ENSG00000181751	56.2244	-1.17781	0.305609	-3.85397	0.000116219	0.0042774
NTM	ENSG00000182667	3.74228	-5.05567	1.31245	-3.85209	0.000117115	0.00429802
AMOTL1	ENSG00000166025	110.485	0.907872	0.2358	3.85019	0.000118028	0.00431914
SGSM3	ENSG00000100359	65.9736	1.14911	0.298915	3.84428	0.000120906	0.00441188
ATP1B3	ENSG00000069849	425.851	-1.01079	0.263229	-3.83995	0.00012306	0.00447695
GBA2	ENSG00000070610	31.6686	1.42872	0.372199	3.8386	0.000123738	0.00447695
CTSV	ENSG00000136943	13.8926	-2.07723	0.541045	-3.83929	0.000123393	0.00447695
PAWR	ENSG00000177425	797.481	-0.833336	0.217854	-3.8252	0.000130666	0.00471427
AC003092.1	ENSG00000236453	5.76839	5.48674	1.43486	3.82389	0.000131365	0.00472619
VCAN	ENSG00000038427	95.6772	1.14676	0.300341	3.8182	0.00013443	0.00482292
CLNS1A	ENSG00000074201	230.941	-1.09296	0.286339	-3.81703	0.000135067	0.00483224
ADAM12	ENSG00000148848	72.0675	1.18662	0.311316	3.81163	0.000138056	0.00492539
BRI3	ENSG00000164713	1551.26	0.968433	0.254159	3.81034	0.000138776	0.00493733
CNIH1	ENSG00000100528	100.024	-0.992237	0.260859	-3.80373	0.000142532	0.00505692
CCNE2	ENSG00000175305	111.948	-0.958172	0.252021	-3.80195	0.000143561	0.00507936
ALDH1A3	ENSG00000184254	41.5304	-1.28696	0.338571	-3.80117	0.000144016	0.00508141
TMEM147	ENSG00000105677	483.678	-0.699368	0.184027	-3.80035	0.00014449	0.00508414
SCRIB	ENSG00000180900	75.7286	1.17293	0.308831	3.79796	0.000145894	0.00511947
SNAPC1	ENSG00000023608	39.9416	-1.33138	0.350796	-3.79532	0.00014745	0.00514734
SLC7A5	ENSG00000103257	363.13	1.01676	0.267904	3.79526	0.000147492	0.00514734
TBC1D13	ENSG00000107021	41.9691	1.2578	0.331738	3.79155	0.000149711	0.00518712
CDC25B	ENSG00000101224	158.081	0.915928	0.241506	3.79257	0.000149097	0.00518712
TXNRD2	ENSG00000184470	262.577	1.08829	0.287048	3.79132	0.000149847	0.00518712
PAG1	ENSG00000076641	16.3279	2.08816	0.550896	3.79049	0.000150353	0.00519063
HES4	ENSG00000188290	485.125	-0.789481	0.208364	-3.78896	0.000151281	0.00520863
CRKL	ENSG00000099942	56.4117	1.2128	0.320274	3.78675	0.00015263	0.00524098
GAS2L1	ENSG00000185340	91.0806	1.18936	0.314354	3.78351	0.000154633	0.00529557
MEIS3	ENSG00000105419	2.7192	-5.36406	1.41832	-3.78198	0.000155584	0.00529979
PPIL2	ENSG00000100023	46.1224	1.23409	0.326267	3.78247	0.000155282	0.00529979
TK1	ENSG00000167900	687.551	-0.601492	0.159114	-3.78027	0.000156661	0.00532231
CYCS	ENSG00000172115	1172.78	-1.07396	0.284288	-3.77773	0.000158263	0.00534836
CPNE1	ENSG00000214078	223.471	-0.935809	0.247681	-3.77828	0.000157913	0.00534836
TXNL1	ENSG00000091164	305.419	-0.970732	0.257014	-3.77697	0.000158751	0.00535074
HSPG2	ENSG00000142798	47.9629	1.40214	0.37138	3.77548	0.000159698	0.00536854
ARF4	ENSG00000168374	502.351	-1.14688	0.303987	-3.77279	0.000161433	0.00540903
KLHL4	ENSG00000102271	28.3147	1.53365	0.406555	3.7723	0.000161747	0.00540903
EFHD2	ENSG00000142634	264.817	0.970417	0.25753	3.76817	0.000164449	0.00547713
TMEM59	ENSG00000116209	341.035	-1.01138	0.268457	-3.76738	0.00016497	0.00547713
RAPGEF1	ENSG00000107263	61.4297	1.13053	0.300096	3.76723	0.000165067	0.00547713
NQO1	ENSG00000181019	1133.74	1.34251	0.356764	3.76301	0.000167878	0.00555604
ALDH3A2	ENSG00000072210	71.2053	0.99331	0.264151	3.76039	0.00016965	0.00560019
DLGAP1-AS1	ENSG00000177337	40.0843	1.38304	0.36834	3.75478	0.000173495	0.0057124
CRAT	ENSG00000095321	86.026	0.976871	0.260246	3.75365	0.00017428	0.00572354
RECQL4	ENSG00000160957	65.8912	1.13081	0.30136	3.75236	0.000175176	0.00573825
PHLDA1	ENSG00000139289	735.222	1.22539	0.327145	3.7457	0.00017989	0.00587763
MANF	ENSG00000145050	304.117	-0.860154	0.229865	-3.74199	0.000182569	0.00594387
PMEPA1	ENSG00000124225	13.2856	-2.57763	0.688911	-3.74161	0.000182845	0.00594387
C5orf15	ENSG00000113583	97.0287	-1.02726	0.274705	-3.7395	0.000184387	0.0059788
ABHD5	ENSG00000011198	60.1349	-1.04248	0.279231	-3.73339	0.000188917	0.00600471
PDE4D	ENSG00000113448	12.0911	2.73731	0.733319	3.73277	0.000189384	0.00600471
DST	ENSG00000151914	461.159	1.03333	0.276804	3.73308	0.000189152	0.00600471
TFPI2	ENSG00000105825	200.135	1.51719	0.406229	3.73481	0.000187854	0.00600471
CSAG1	ENSG00000198930	3.24484	-5.59578	1.49936	-3.73212	0.000189874	0.00600471
GDF6	ENSG00000156466	78.4934	-1.17941	0.31593	-3.73314	0.000189104	0.00600471
C9orf16	ENSG00000171159	702.002	0.722643	0.193603	3.7326	0.000189511	0.00600471
FANCF	ENSG00000183161	7.45801	-2.83433	0.759222	-3.7332	0.000189063	0.00600471
SDHD	ENSG00000204370	299.509	-0.891232	0.238546	-3.7361	0.000186896	0.00600471
PHF5A	ENSG00000100410	417.742	0.627956	0.168181	3.73381	0.000188606	0.00600471
COX11	ENSG00000166260	144.75	-0.975166	0.261607	-3.7276	0.000193315	0.00609847
RBFOX2	ENSG00000100320	203.253	0.701507	0.188232	3.72682	0.000193913	0.0061023
TRIM8	ENSG00000171206	113.973	1.06404	0.285559	3.72616	0.000194415	0.00610312
A4GALT	ENSG00000128274	13.5647	2.438	0.655376	3.72	0.00019922	0.00623864
PEX26	ENSG00000215193	78.6415	1.10366	0.296772	3.71887	0.000200117	0.00625145
ADAMTS5	ENSG00000154736	9.2294	-2.53453	0.682731	-3.71234	0.000205349	0.00639928
RP11-25K19.1	ENSG00000167912	32.0232	1.63674	0.441274	3.70912	0.000207983	0.00646564
RIN1	ENSG00000174791	56.4479	1.11756	0.301454	3.70722	0.000209548	0.00649853
RGS5	ENSG00000143248	17.3699	-2.60676	0.703383	-3.70603	0.000210531	0.00651325
HIPK2	ENSG00000064393	108.773	1.0517	0.283832	3.70536	0.000211094	0.00651493
GNL3	ENSG00000163938	270.623	-0.735819	0.198726	-3.70269	0.000213327	0.00655225
SOX12	ENSG00000177732	60.4498	1.13497	0.306487	3.70316	0.000212927	0.00655225
CCNC	ENSG00000112237	163.349	-0.802503	0.21697	-3.69869	0.000216717	0.00662461
FBXO16	ENSG00000214050	3.44527	-4.94221	1.33607	-3.69906	0.000216398	0.00662461
SEMA3A	ENSG00000075213	16.2592	1.9734	0.534014	3.6954	0.000219539	0.00669491
EAPP	ENSG00000129518	80.805	-0.964071	0.261239	-3.69038	0.000223919	0.0067961
COLGALT1	ENSG00000130309	142.134	0.960135	0.260143	3.6908	0.000223552	0.0067961
MPST	ENSG00000128309	346.513	0.826893	0.224113	3.68963	0.00022458	0.00680006
BZW2	ENSG00000136261	145.639	-0.879978	0.238588	-3.68828	0.000225776	0.00682013
ALDH2	ENSG00000111275	4.81672	-4.67055	1.26693	-3.68652	0.000227345	0.00685138
UBE2L6	ENSG00000156587	108.992	-1.12564	0.305601	-3.68336	0.000230177	0.00692044
COMMD10	ENSG00000145781	57.8168	-1.27004	0.345176	-3.67939	0.000233795	0.00701277
PSMC6	ENSG00000100519	111.29	-1.0619	0.288908	-3.67556	0.000237324	0.00710197
PRDX6	ENSG00000117592	702.577	-0.813907	0.221811	-3.66937	0.000243147	0.00723455
SPRY1	ENSG00000164056	7.77852	4.92391	1.34186	3.66947	0.000243053	0.00723455
ATP6AP2	ENSG00000182220	184.482	-1.05523	0.287602	-3.66905	0.000243458	0.00723455
WDFY2	ENSG00000139668	48.1714	1.1627	0.316946	3.66846	0.000244014	0.00723455
MGAT4B	ENSG00000161013	215.002	0.738827	0.201493	3.66676	0.000245642	0.0072371
HIVEP2	ENSG00000010818	22.8945	1.78746	0.487523	3.66642	0.000245975	0.0072371
GDPD5	ENSG00000158555	2.66806	-5.34145	1.45725	-3.66543	0.000246925	0.0072371
MICALL1	ENSG00000100139	51.6956	1.22766	0.334899	3.66575	0.000246613	0.0072371
GTPBP1	ENSG00000100226	44.8315	1.36187	0.371327	3.66757	0.000244869	0.0072371
MICAL3	ENSG00000243156	66.0043	1.05771	0.288626	3.66465	0.000247678	0.00724262
RAB1A	ENSG00000138069	329.78	-0.962377	0.262735	-3.66293	0.000249349	0.00727487
HMGB1	ENSG00000189403	1331.59	-0.598505	0.163431	-3.66212	0.000250139	0.00728132
DOCK10	ENSG00000135905	66.4412	1.07636	0.294278	3.65763	0.00025456	0.00739321
PSENEN	ENSG00000205155	275.13	-0.826958	0.226189	-3.65605	0.00025613	0.00742198
SPATA6	ENSG00000132122	2.80857	-5.38718	1.47583	-3.65028	0.000261958	0.00755763
TMEM8A	ENSG00000129925	44.8737	1.15824	0.317304	3.65024	0.000261992	0.00755763
TCEAL7	ENSG00000182916	3.82262	-5.09224	1.3959	-3.648	0.000264287	0.00759556
RAP1B	ENSG00000127314	311.343	-0.6771	0.185619	-3.6478	0.000264493	0.00759556
PLAT	ENSG00000104368	52.407	1.15926	0.318032	3.6451	0.000267287	0.00765863
BTF3L4	ENSG00000134717	234.006	-0.812876	0.223713	-3.63357	0.000279531	0.00799158
GGH	ENSG00000137563	305.701	-1.03221	0.28422	-3.63172	0.000281536	0.00799537
VCP	ENSG00000165280	444.921	0.754489	0.20772	3.63224	0.000280967	0.00799537
LINC00665	ENSG00000232677	51.2987	-1.07645	0.296401	-3.63173	0.000281533	0.00799537
IRAK1	ENSG00000184216	354.35	0.840231	0.231588	3.62813	0.00028548	0.00806833
FTH1	ENSG00000167996	28722.4	0.81982	0.225991	3.62767	0.000285995	0.00806833
SPCS2	ENSG00000118363	422.414	-1.06219	0.292789	-3.62784	0.000285804	0.00806833
LRRC17	ENSG00000128606	5.62055	-3.91295	1.07882	-3.62708	0.000286649	0.00806883
SLC7A2	ENSG00000003989	63.0217	-1.50672	0.415474	-3.62651	0.000287273	0.00806883
CHRNB1	ENSG00000170175	15.1226	-2.11695	0.584088	-3.62437	0.00028967	0.00811837
TMEM201	ENSG00000188807	39.8504	1.38309	0.381778	3.62276	0.000291476	0.00815116
PDLIM3	ENSG00000154553	14.1915	2.62009	0.723937	3.61923	0.000295485	0.00824524
CALM2	ENSG00000143933	3809	-1.13974	0.315209	-3.6158	0.000299419	0.00833686
RP11-173B14.5	ENSG00000261105	6.14336	-3.37809	0.935372	-3.61149	0.00030444	0.00845828
MRPL19	ENSG00000115364	194.933	-1.03625	0.287059	-3.60989	0.000306329	0.00849234
ISG15	ENSG00000187608	343.207	-1.01639	0.281827	-3.60644	0.000310421	0.00858721
SUCLA2	ENSG00000136143	52.6229	-1.40214	0.38895	-3.60492	0.000312247	0.00861909
IGSF3	ENSG00000143061	3.28025	-4.85207	1.34706	-3.60196	0.000315826	0.00866272
FIBCD1	ENSG00000130720	65.1589	1.33437	0.3704	3.6025	0.000315169	0.00866272
CTB-55O6.12	ENSG00000267169	19.0295	1.8272	0.507281	3.60194	0.000315857	0.00866272
NDUFC2	ENSG00000151366	1027.98	-0.757883	0.210991	-3.59201	0.000328139	0.00898035
RP1-74M1.3	ENSG00000272796	2.70046	-5.33956	1.48846	-3.58731	0.000334105	0.0091088
RPS12	ENSG00000112306	10092.3	0.86312	0.240611	3.58719	0.000334255	0.0091088
SLC39A4	ENSG00000147804	51.4307	-1.16152	0.323897	-3.58607	0.000335702	0.00912881
PPP2CA	ENSG00000113575	177.395	-0.952125	0.265611	-3.58466	0.000337514	0.00915864
PPP6R2	ENSG00000100239	63.879	1.32962	0.371074	3.58316	0.000339457	0.0091919
PTK2	ENSG00000169398	154.593	0.725366	0.202613	3.58005	0.000343522	0.00928234
ZSCAN18	ENSG00000121413	2.46869	-5.23375	1.46263	-3.57832	0.000345808	0.00932443
SELO	ENSG00000073169	67.6185	1.02348	0.286322	3.57457	0.000350799	0.00943916
PRRC2B	ENSG00000130723	189.315	0.746932	0.209126	3.57169	0.000354686	0.00952373
SPA17	ENSG00000064199	34.4802	-1.27706	0.357611	-3.57108	0.00035551	0.00952588
ALG8	ENSG00000159063	72.3663	-1.27324	0.35669	-3.56959	0.000357539	0.00956025
TMTC1	ENSG00000133687	9.7734	4.38648	1.23013	3.56587	0.000362657	0.0096769
SCCPDH	ENSG00000143653	161.666	-0.94288	0.264478	-3.56506	0.000363773	0.00968651
DCAF13	ENSG00000164934	178.326	-1.14029	0.319932	-3.56416	0.000365022	0.00969959
GCNT1	ENSG00000187210	21.9617	1.73934	0.488149	3.56313	0.000366463	0.00971772
PGF	ENSG00000119630	43.7108	1.81704	0.510144	3.56181	0.000368312	0.00974656
ANKRD36C	ENSG00000174501	36.5181	1.39829	0.392843	3.55942	0.000371679	0.0097952
NEDD9	ENSG00000111859	10.1532	-2.45535	0.689719	-3.55992	0.000370964	0.0097952
AP2S1	ENSG00000042753	2626.84	-0.514077	0.144558	-3.55619	0.000376267	0.00989575
PDHB	ENSG00000168291	236.321	-1.05534	0.296989	-3.55345	0.00038021	0.00997894
MED15	ENSG00000099917	96.3943	0.939622	0.264514	3.55226	0.000381931	0.0100036
PLAC9	ENSG00000189129	6.36897	-2.95332	0.832086	-3.5493	0.000386257	0.0100963
MCM3	ENSG00000112118	355.7	0.616858	0.173849	3.54824	0.000387808	0.0101162
RP11-383H13.1	ENSG00000235531	11.3771	2.64847	0.746633	3.54722	0.000389317	0.0101349
MAPRE3	ENSG00000084764	7.96296	-2.50514	0.706368	-3.54651	0.000390365	0.0101416
RHOA	ENSG00000067560	693.382	-0.799726	0.225641	-3.54425	0.000393734	0.0102084
TOX2	ENSG00000124191	12.1392	4.69699	1.32552	3.5435	0.000394859	0.0102169
BCL2L12	ENSG00000126453	200.026	-0.676703	0.191131	-3.54051	0.000399356	0.0103124
SNRNP200	ENSG00000144028	152.111	0.744791	0.210483	3.53848	0.000402431	0.0103501
SCARB1	ENSG00000073060	51.9116	1.36702	0.386297	3.53878	0.000401984	0.0103501
GS1-600G8.5	ENSG00000235385	12.0091	3.59747	1.01709	3.53703	0.000404656	0.0103865
SNX3	ENSG00000112335	937.177	-0.683553	0.19334	-3.5355	0.000407	0.0104257
PTGES3	ENSG00000110958	729.943	-0.69655	0.197068	-3.53457	0.000408441	0.0104417
RAP1A	ENSG00000116473	160.731	-0.811959	0.229941	-3.53116	0.00041374	0.0105351
U2SURP	ENSG00000163714	212.855	-0.708643	0.200659	-3.53159	0.000413074	0.0105351
AIM1L	ENSG00000176092	8.12619	-2.86177	0.810736	-3.52984	0.000415815	0.010567
NIT2	ENSG00000114021	169.904	-1.05429	0.298786	-3.52859	0.000417783	0.010596
TAX1BP1	ENSG00000106052	297.109	-0.843521	0.239115	-3.52768	0.000419214	0.0106101
SNRPB2	ENSG00000125870	238.509	-0.925118	0.262321	-3.52667	0.000420827	0.0106101
TMEM50B	ENSG00000142188	33.5871	-1.3638	0.38667	-3.52703	0.000420243	0.0106101
SMYD2	ENSG00000143499	84.2579	-0.922476	0.261624	-3.52595	0.00042196	0.0106178
WHSC1	ENSG00000109685	183.871	0.736321	0.209004	3.523	0.000426683	0.0107156
RASA3	ENSG00000185989	51.996	1.21996	0.346852	3.51722	0.000436096	0.0109306
MYO9B	ENSG00000099331	85.4629	0.904686	0.257422	3.51441	0.000440738	0.0110253
DDX17	ENSG00000100201	212.125	0.708043	0.201531	3.51331	0.000442554	0.0110492
C11orf58	ENSG00000110696	771.334	-0.959277	0.273112	-3.51239	0.000444092	0.011066
DENND3	ENSG00000105339	30.1808	1.46332	0.416844	3.51048	0.000447298	0.0111027
RP11-160O5.1	ENSG00000263470	79.3836	1.1896	0.338826	3.51093	0.000446536	0.0111027
TMCO1	ENSG00000143183	261.927	-0.951169	0.271028	-3.50948	0.00044898	0.0111229
PSMG1	ENSG00000183527	317.332	-0.961783	0.274208	-3.5075	0.000452342	0.0111846
AP006222.2	ENSG00000228463	160.355	0.771392	0.220151	3.50392	0.000458469	0.0113142
TOM1	ENSG00000100284	30.9431	1.34958	0.385738	3.4987	0.000467538	0.0115158
WNT7B	ENSG00000188064	27.5319	-1.82942	0.523909	-3.49186	0.000479669	0.0117919
GPR39	ENSG00000183840	13.5274	2.26525	0.64918	3.4894	0.000484114	0.0118784
ANKRD32	ENSG00000133302	42.8668	-1.25791	0.360666	-3.48775	0.000487105	0.011929
NSL1	ENSG00000117697	113.641	-1.12957	0.324236	-3.48377	0.000494398	0.0120845
SLC25A37	ENSG00000147454	183.418	0.796313	0.228665	3.48244	0.000496865	0.0121216
FAM120A	ENSG00000048828	128.708	0.845109	0.24281	3.48053	0.000500415	0.012185
ATRNL1	ENSG00000107518	28.3968	-1.2531	0.360843	-3.4727	0.000515258	0.0125226
NGF	ENSG00000134259	11.0903	-1.95473	0.563585	-3.46839	0.000523596	0.0127012
IFT46	ENSG00000118096	25.993	-1.27128	0.366792	-3.46594	0.000528391	0.0127933
NCLN	ENSG00000125912	149.87	0.853733	0.246518	3.46316	0.000533869	0.0129015
IL11	ENSG00000095752	144.402	-1.46167	0.422212	-3.46193	0.000536307	0.0129117
ATF4	ENSG00000128272	540.903	0.690512	0.199439	3.46228	0.00053562	0.0129117
DCK	ENSG00000156136	75.7404	-0.908488	0.262621	-3.45931	0.000541566	0.0130138
RCN2	ENSG00000117906	193.525	-0.928312	0.268397	-3.45873	0.000542734	0.0130175
MSANTD3	ENSG00000066697	199.788	0.741975	0.214677	3.45624	0.000547764	0.0131136
IARS	ENSG00000196305	236.491	0.790938	0.228933	3.45489	0.000550511	0.0131547
COPS5	ENSG00000121022	234.013	-0.745119	0.215815	-3.45259	0.000555241	0.0132431
LMNB2	ENSG00000176619	134.145	0.802546	0.232567	3.45082	0.000558896	0.0133055
GPN1	ENSG00000198522	76.8612	-1.0294	0.298484	-3.44876	0.000563176	0.0133825
MBD3	ENSG00000071655	194.778	0.911724	0.264512	3.44682	0.000567233	0.0134539
ENDOD1	ENSG00000149218	2.73993	-5.35984	1.55685	-3.44275	0.000575824	0.0136325
TOR4A	ENSG00000198113	64.7563	1.12744	0.327674	3.44075	0.000580105	0.0136832
RPS2	ENSG00000140988	71321.2	0.632916	0.183936	3.44095	0.000579674	0.0136832
GABBR1	ENSG00000204681	2.35869	-5.14111	1.49525	-3.4383	0.000585388	0.0137824
DGCR2	ENSG00000070413	38.6031	1.25098	0.364421	3.43279	0.00059741	0.0140397
UBA5	ENSG00000081307	48.3084	-1.13178	0.329845	-3.43125	0.000600799	0.0140677
EMP1	ENSG00000134531	38.2495	1.27732	0.372219	3.43163	0.000599962	0.0140677
ABCF2	ENSG00000033050	127.705	0.856955	0.249908	3.42909	0.000605617	0.0141546
YWHAQ	ENSG00000134308	913.224	-0.856395	0.249937	-3.42644	0.000611544	0.0142671
DUS1L	ENSG00000169718	120.255	0.950305	0.277385	3.42594	0.00061268	0.0142676
C11orf74	ENSG00000166352	50.2563	-1.13831	0.332313	-3.42542	0.000613847	0.0142689
SNRPD2	ENSG00000125743	1214.37	-0.636707	0.186118	-3.42098	0.000623951	0.0144775
EPN2	ENSG00000072134	61.6319	1.16361	0.340327	3.41909	0.000628304	0.0145521
PHF10	ENSG00000130024	48.1423	1.05308	0.308127	3.41768	0.00063158	0.0146016
SLC27A4	ENSG00000167114	50.233	1.41473	0.414148	3.416	0.00063549	0.0146135
UQCRFS1	ENSG00000169021	691.909	-0.781855	0.228845	-3.41652	0.00063426	0.0146135
KIAA1644	ENSG00000138944	15.782	1.92973	0.564913	3.41598	0.000635519	0.0146135
FANCG	ENSG00000221829	53.8928	0.987691	0.289226	3.41494	0.000637954	0.0146432
VAV2	ENSG00000160293	46.4599	1.16724	0.34252	3.4078	0.000654894	0.0150051
MRPS6	ENSG00000243927	229.351	-0.920904	0.270308	-3.40687	0.000657135	0.0150296
PTPRK	ENSG00000152894	58.5988	0.944073	0.277182	3.40597	0.000659284	0.0150519
ASS1	ENSG00000130707	2.24669	-5.08389	1.49361	-3.40376	0.000664658	0.0151476
CYSTM1	ENSG00000120306	152.224	-1.03085	0.303213	-3.39975	0.000674485	0.0153442
FAM219B	ENSG00000178761	53.9092	0.990508	0.291393	3.39922	0.000675778	0.0153464
MRPL32	ENSG00000106591	339.141	-0.816876	0.240374	-3.39835	0.000677927	0.0153679
SEP15	ENSG00000183291	358.118	-0.914126	0.269186	-3.3959	0.000684045	0.0154792
IFI44L	ENSG00000137959	13.4064	2.00733	0.591696	3.39249	0.000692594	0.0156451
CPNE7	ENSG00000178773	114.238	0.873232	0.257446	3.3919	0.00069409	0.0156512
MLLT6	ENSG00000108292	77.3498	0.906348	0.267302	3.39073	0.000697073	0.0156909
AASDHPPT	ENSG00000149313	95.7459	-1.03264	0.304705	-3.38897	0.000701559	0.0157555
BTG3	ENSG00000154640	165.655	-0.786652	0.232144	-3.38864	0.000702403	0.0157555
TRMU	ENSG00000100416	128.68	0.793601	0.234453	3.3849	0.000712038	0.0159437
C11orf68	ENSG00000175573	106.467	0.848396	0.250823	3.38246	0.00071841	0.0160583
H2AFY	ENSG00000113648	502.101	-0.786476	0.232619	-3.38096	0.000722332	0.0161178
PABPC4	ENSG00000090621	367.69	0.666204	0.197138	3.37938	0.000726502	0.0161546
UBE2D1	ENSG00000072401	102.042	-0.994253	0.294174	-3.37981	0.000725347	0.0161546
TMEM88	ENSG00000167874	7.83558	-2.32503	0.688163	-3.3786	0.000728563	0.0161723
MT2A	ENSG00000125148	9569.73	-0.722159	0.213959	-3.37522	0.000737576	0.0163441
BAG1	ENSG00000107262	181.744	0.744733	0.220723	3.37405	0.0007407	0.016385
DLG1	ENSG00000075711	114.308	-0.744108	0.220571	-3.37355	0.000742043	0.0163863
ALCAM	ENSG00000170017	305.603	-0.641252	0.190118	-3.37293	0.00074374	0.0163956
TNFSF12	ENSG00000239697	2.19361	-5.05619	1.49996	-3.37088	0.000749293	0.0164896
CSF1	ENSG00000184371	47.3857	1.4218	0.422423	3.36581	0.000763192	0.0167667
HYI	ENSG00000178922	312.508	-0.768187	0.228322	-3.36449	0.000766843	0.016818
TPRKB	ENSG00000144034	215.034	-0.926248	0.275523	-3.36179	0.000774398	0.0169547
RCAN3	ENSG00000117602	4.35215	-3.93408	1.17175	-3.35744	0.000786664	0.0171366
ABCG2	ENSG00000118777	15.2984	2.12284	0.632282	3.35743	0.000786721	0.0171366
STC1	ENSG00000159167	23.9237	2.45366	0.730746	3.35775	0.0007858	0.0171366
ZDHHC17	ENSG00000186908	29.4558	-1.20771	0.359776	-3.35685	0.000788354	0.017143
CACYBP	ENSG00000116161	903.086	-0.950007	0.283296	-3.3534	0.000798242	0.0172171
DYNC1LI1	ENSG00000144635	92.3987	-0.841788	0.250947	-3.35445	0.00079523	0.0172171
PAIP2	ENSG00000120727	244.16	-0.836465	0.249548	-3.35193	0.000802513	0.0172171
GCNT2	ENSG00000111846	14.7734	1.81139	0.540356	3.35221	0.00080168	0.0172171
CPSF1	ENSG00000071894	59.212	1.041	0.310306	3.35474	0.0007944	0.0172171
HMGA2	ENSG00000149948	466.803	0.7138	0.212827	3.3539	0.000796817	0.0172171
MED4	ENSG00000136146	112.062	-0.957189	0.285552	-3.35207	0.000802101	0.0172171
CBY1	ENSG00000100211	146.805	0.833428	0.248614	3.3523	0.000801424	0.0172171
COMMD1	ENSG00000173163	202.162	-0.898051	0.268093	-3.34978	0.00080876	0.0173221
PDIA6	ENSG00000143870	596.947	-0.904808	0.270201	-3.34864	0.000812083	0.0173642
TBCB	ENSG00000105254	568.211	-0.702563	0.210138	-3.34334	0.000827768	0.0176701
DKK2	ENSG00000155011	5.72718	-3.4573	1.03436	-3.34245	0.00083042	0.0176972
RNF115	ENSG00000121848	115.776	-0.706525	0.211527	-3.34011	0.000837447	0.0178173
TNFAIP8	ENSG00000145779	60.7078	-0.94453	0.28318	-3.33545	0.00085163	0.018089
RIPPLY2	ENSG00000203877	16.1878	2.01045	0.603169	3.33316	0.000858668	0.0182083
PSMD6	ENSG00000163636	194.034	-1.05138	0.315527	-3.33213	0.000861841	0.0182153
TSPAN9	ENSG00000011105	4.57759	-3.53535	1.06098	-3.33215	0.000861763	0.0182153
EIF2S1	ENSG00000134001	205.957	-0.829678	0.249088	-3.33086	0.000865789	0.0182686
LDOC1L	ENSG00000188636	21.4972	1.56875	0.471247	3.32894	0.000871764	0.0183644
FAM219A	ENSG00000164970	32.944	1.39096	0.41806	3.32718	0.000877306	0.0184508
MRPL1	ENSG00000169288	54.8847	-1.14443	0.344119	-3.32568	0.000882017	0.0185195
MTHFD1L	ENSG00000120254	183.368	0.667675	0.200886	3.32364	0.000888496	0.018625
TMX2	ENSG00000213593	130.601	-0.911447	0.274336	-3.32237	0.00089257	0.0186798
MRPL47	ENSG00000136522	211.572	-0.710023	0.213805	-3.32089	0.000897305	0.0187483
CENPU	ENSG00000151725	127.86	-0.824022	0.248388	-3.31747	0.000908354	0.0189222
EFS	ENSG00000100842	2.77265	-4.61996	1.39264	-3.3174	0.000908584	0.0189222
F2R	ENSG00000181104	82.5447	0.839619	0.253338	3.31422	0.000919001	0.0190258
DDX11	ENSG00000013573	92.9193	0.784571	0.236708	3.31451	0.000918025	0.0190258
MYOCD	ENSG00000141052	34.2634	-1.47014	0.443535	-3.31459	0.000917777	0.0190258
RABAC1	ENSG00000105404	408.922	-0.746779	0.225336	-3.31407	0.000919499	0.0190258
SCP2	ENSG00000116171	316.788	-1.00745	0.304099	-3.31291	0.000923308	0.0190691
RPP40	ENSG00000124787	70.4419	-1.13732	0.343339	-3.31253	0.00092457	0.0190691
EIF4G1	ENSG00000114867	564.523	0.720692	0.217678	3.31082	0.000930231	0.019155
THOC7	ENSG00000163634	326.329	-0.809939	0.244863	-3.30773	0.000940561	0.0193165
GART	ENSG00000159131	107.703	-0.793704	0.239966	-3.30757	0.000941093	0.0193165
SLC35D2	ENSG00000130958	33.5448	1.26631	0.382929	3.30691	0.00094331	0.0193311
NLRC5	ENSG00000140853	31.5753	1.23369	0.373561	3.30251	0.000958237	0.0196056
PHF14	ENSG00000106443	244.641	-0.666604	0.202182	-3.29705	0.000977063	0.0199589
GLRX3	ENSG00000108010	535.981	-0.818174	0.248419	-3.29353	0.000989389	0.0201785
ZP3	ENSG00000188372	2.11012	-4.98836	1.51565	-3.29124	0.000997485	0.0201925
PKN3	ENSG00000160447	34.5608	1.15331	0.350376	3.29163	0.000996074	0.0201925
PSMA1	ENSG00000129084	434.317	-0.872215	0.265036	-3.29093	0.000998558	0.0201925
GTF2F2	ENSG00000188342	99.6102	-1.07623	0.326981	-3.29142	0.000996839	0.0201925
DSTN	ENSG00000125868	2034.35	-0.65196	0.198104	-3.291	0.000998316	0.0201925
LDLR	ENSG00000130164	156.145	0.808202	0.245605	3.29066	0.000999535	0.0201925
FRMD6	ENSG00000139926	139.024	-0.970556	0.295038	-3.28959	0.00100333	0.0202372
YAE1D1	ENSG00000241127	37.2637	-1.25018	0.380199	-3.28823	0.00100819	0.0203013
GNA11	ENSG00000088256	98.36	0.862017	0.262185	3.28782	0.00100967	0.0203013
YPEL5	ENSG00000119801	51.2321	-1.09078	0.332007	-3.28541	0.00101833	0.0203032
PCOLCE2	ENSG00000163710	20.6175	1.89619	0.577088	3.28579	0.00101696	0.0203032
TJAP1	ENSG00000137221	33.8711	1.32774	0.40403	3.28623	0.00101537	0.0203032
EID2	ENSG00000176396	44.465	-1.18668	0.361225	-3.28515	0.00101928	0.0203032
ZDHHC8	ENSG00000099904	36.4177	1.36507	0.415449	3.28576	0.00101707	0.0203032
DUSP18	ENSG00000167065	4.77977	-3.27741	0.99705	-3.2871	0.00101224	0.0203032
ALDH5A1	ENSG00000112294	4.11187	-3.78521	1.15316	-3.28247	0.00102901	0.0204334
IKBKB	ENSG00000104365	38.205	1.18614	0.361328	3.28274	0.00102804	0.0204334
RP11-680A11.5	ENSG00000257605	64.8684	0.976648	0.297651	3.28118	0.00103373	0.0204954
ZNF259	ENSG00000109917	117.738	-0.858781	0.261785	-3.28049	0.00103627	0.020514
HNRNPA2B1	ENSG00000122566	2380.77	-0.624845	0.190525	-3.2796	0.00103954	0.020547
UQCR10	ENSG00000184076	1972.38	0.563343	0.171809	3.27888	0.00104219	0.0205677
CD55	ENSG00000196352	79.9153	-0.958528	0.29284	-3.27321	0.00106333	0.0209526
PAIP2B	ENSG00000124374	16.2211	-1.88853	0.577174	-3.27204	0.00106775	0.0209752
EIF3K	ENSG00000178982	892.1	-0.712524	0.217741	-3.27234	0.00106661	0.0209752
MEGF9	ENSG00000106780	25.5243	1.58584	0.485021	3.26964	0.00107684	0.0210245
ANXA7	ENSG00000138279	309.539	-0.70565	0.215759	-3.27055	0.00107339	0.0210245
BHLHE41	ENSG00000123095	27.7203	1.30837	0.400087	3.27022	0.00107463	0.0210245
ARL6IP1	ENSG00000170540	93.9619	-0.751176	0.229741	-3.26966	0.00107677	0.0210245
C1orf131	ENSG00000143633	79.968	-0.899406	0.275121	-3.26913	0.00107879	0.0210306
EHD4	ENSG00000103966	65.9776	1.02296	0.313058	3.26764	0.00108449	0.0211096
HMGN1	ENSG00000205581	1440.96	-0.673248	0.206093	-3.26672	0.00108802	0.0211462
PBK	ENSG00000168078	61.706	-1.11641	0.3418	-3.26626	0.00108977	0.0211481
PSPH	ENSG00000146733	178.547	-0.962398	0.294694	-3.26575	0.00109173	0.0211542
DNAJC18	ENSG00000170464	18.7828	-1.53919	0.471606	-3.26372	0.0010996	0.0212745
NEXN	ENSG00000162614	339.535	-0.678595	0.208112	-3.26071	0.00111132	0.0213659
MTHFD2	ENSG00000065911	337.974	-0.762568	0.233809	-3.2615	0.00110826	0.0213659
FBXL5	ENSG00000118564	41.3013	-1.00355	0.307761	-3.26082	0.00111089	0.0213659
RP11-138A9.1	ENSG00000271204	16.5739	1.69982	0.521327	3.26056	0.00111191	0.0213659
EPS8L2	ENSG00000177106	33.3941	-1.46868	0.450465	-3.26037	0.00111267	0.0213659
SRD5A1	ENSG00000145545	67.0206	-0.879791	0.270142	-3.25677	0.00112686	0.0215094
RP11-215G15.5	ENSG00000272016	20.6677	1.4884	0.456983	3.25702	0.00112589	0.0215094
DOPEY1	ENSG00000083097	13.2706	-1.7842	0.547706	-3.25758	0.00112367	0.0215094
TYMP	ENSG00000025708	79.7477	0.985887	0.302638	3.25765	0.00112339	0.0215094
TMSB15A	ENSG00000158164	44.1927	-1.15488	0.354902	-3.25407	0.00113764	0.0216829
ATRAID	ENSG00000138085	398.518	-0.659084	0.202592	-3.25325	0.00114092	0.0216909
MORC4	ENSG00000133131	131.267	0.836432	0.25715	3.2527	0.00114314	0.0216909
NT5DC3	ENSG00000111696	28.8471	1.40271	0.431194	3.25308	0.0011416	0.0216909
FBN2	ENSG00000138829	20.3473	1.58451	0.487258	3.2519	0.00114638	0.0217202
CCDC152	ENSG00000198865	36.0712	-1.22782	0.377644	-3.25126	0.00114894	0.0217366
S100A2	ENSG00000196754	105.865	-0.868466	0.267202	-3.25023	0.00115314	0.0217837
SIGMAR1	ENSG00000147955	330.293	0.750012	0.230905	3.24814	0.00116162	0.0219117
PISD	ENSG00000241878	62.5687	0.97307	0.299657	3.24728	0.00116513	0.0219455
VEGFA	ENSG00000112715	114.337	1.11766	0.344239	3.24677	0.00116723	0.0219528
PDCD10	ENSG00000114209	114.749	-0.932346	0.287314	-3.24504	0.00117433	0.022054
KCTD15	ENSG00000153885	5.30649	-3.4504	1.06364	-3.24397	0.00117878	0.0221051
DZIP1	ENSG00000134874	76.4353	0.986781	0.304244	3.24339	0.00118116	0.0221174
FHL2	ENSG00000115641	976.291	-0.720016	0.222092	-3.24198	0.00118703	0.0221896
DIS3	ENSG00000083520	132.396	0.911703	0.281248	3.24163	0.00118848	0.0221896
STC2	ENSG00000113739	2270.88	-0.576934	0.178063	-3.24005	0.00119509	0.0222805
TSPYL1	ENSG00000189241	36.4	1.10912	0.342488	3.23841	0.00120199	0.0223441
TBC1D22A	ENSG00000054611	46.3938	1.04304	0.322054	3.23872	0.00120068	0.0223441
SEC16A	ENSG00000148396	73.1145	0.890253	0.275028	3.23695	0.00120814	0.0223934
THYN1	ENSG00000151500	173.555	-0.852607	0.26337	-3.23729	0.00120669	0.0223934
DDX42	ENSG00000198231	116.331	0.708528	0.219162	3.23289	0.00122544	0.0226812
FAM73B	ENSG00000148343	25.679	1.34106	0.415136	3.23042	0.00123608	0.0228451
ZFP28	ENSG00000196867	3.67123	-4.22083	1.30676	-3.22999	0.00123796	0.0228469
COMMD2	ENSG00000114744	164.135	-0.712092	0.220543	-3.22881	0.00124308	0.0228763
ARHGAP24	ENSG00000138639	15.0152	1.81773	0.562976	3.2288	0.00124312	0.0228763
COL6A2	ENSG00000142173	123.659	0.843984	0.261444	3.22816	0.0012459	0.0228945
SH2B3	ENSG00000111252	110.714	0.885418	0.274586	3.22456	0.00126168	0.0231512
IRF7	ENSG00000185507	28.9444	-1.27221	0.395053	-3.22035	0.00128035	0.0234602
DENND1A	ENSG00000119522	46.1399	1.00901	0.313719	3.21629	0.00129861	0.0237609
USP2-AS1	ENSG00000245248	6.35899	-2.49122	0.775277	-3.21333	0.00131206	0.0239727
GEM	ENSG00000164949	18.5548	1.55897	0.485268	3.2126	0.00131539	0.0239993
TIMM17A	ENSG00000134375	516.684	-0.844782	0.263024	-3.2118	0.00131904	0.0240318
CDPF1	ENSG00000205643	62.4609	0.940182	0.292803	3.21097	0.0013229	0.0240677
PEPD	ENSG00000124299	102.729	-0.824595	0.256875	-3.2101	0.00132688	0.024106
IDNK	ENSG00000148057	21.9043	2.00402	0.624689	3.20804	0.00133645	0.0242454
PPA1	ENSG00000180817	740.174	-0.963088	0.300291	-3.20719	0.00134041	0.0242828
ASPH	ENSG00000198363	794.529	0.831198	0.259462	3.20355	0.00135744	0.024522
ATP5O	ENSG00000241837	682.194	-0.84993	0.265296	-3.2037	0.00135672	0.024522
NUP50	ENSG00000093000	82.6282	0.827379	0.258352	3.20253	0.00136227	0.0245745
DYNC2LI1	ENSG00000138036	23.2326	-1.31805	0.411961	-3.19946	0.00137687	0.0247681
FAM20C	ENSG00000177706	140.12	1.07347	0.335482	3.19978	0.00137532	0.0247681
LDHA	ENSG00000134333	2965.77	-1.10484	0.345624	-3.19664	0.00139037	0.024941
TXN2	ENSG00000100348	651.26	0.592692	0.185388	3.19703	0.00138848	0.024941
NPTX1	ENSG00000171246	13.7206	-2.17796	0.681427	-3.19617	0.00139266	0.0249471
CDC42	ENSG00000070831	420.583	-0.607558	0.190174	-3.19475	0.0013995	0.0250093
NDUFS5	ENSG00000168653	1508.46	-0.603981	0.189108	-3.19384	0.00140394	0.0250093
EMB	ENSG00000170571	55.5673	-1.13979	0.356792	-3.19454	0.00140052	0.0250093
DTD1	ENSG00000125821	273.317	-0.691152	0.216392	-3.19399	0.00140323	0.0250093
INF2	ENSG00000203485	105.01	0.773817	0.242395	3.19238	0.00141103	0.0251007
MARCH4	ENSG00000144583	8.34547	-2.2018	0.690033	-3.19087	0.00141847	0.0251631
TOMM22	ENSG00000100216	930.843	0.533827	0.167283	3.19116	0.00141702	0.0251631
IFNGR1	ENSG00000027697	31.2285	-1.30591	0.409381	-3.18996	0.00142292	0.0252072
TNFAIP6	ENSG00000123610	2.84021	-4.64011	1.4561	-3.18668	0.00143914	0.0253891
MRPS18C	ENSG00000163319	305.416	-0.666158	0.208996	-3.18742	0.0014355	0.0253891
ARHGEF6	ENSG00000129675	9.7164	2.44115	0.765999	3.18688	0.00143815	0.0253891
ARID4B	ENSG00000054267	86.904	-0.856766	0.268921	-3.18594	0.00144284	0.0254194
TMEM179B	ENSG00000185475	237.024	-0.645087	0.202554	-3.18477	0.0014487	0.0254875
C6orf1	ENSG00000186577	226.332	0.714526	0.224761	3.17905	0.00147757	0.0259598
RAI1	ENSG00000108557	42.8883	1.01554	0.319619	3.17734	0.00148632	0.0260778
RPTOR	ENSG00000141564	34.6734	1.16971	0.368255	3.17637	0.00149133	0.0261299
FHOD3	ENSG00000134775	17.3886	1.60154	0.504555	3.17416	0.00150272	0.0262934
PARD3	ENSG00000148498	66.8841	0.849201	0.26762	3.17316	0.00150788	0.0263478
PHEX	ENSG00000102174	3.32891	4.71418	1.48626	3.17184	0.00151474	0.0264316
CCDC148	ENSG00000153237	13.7321	-1.78047	0.561451	-3.17119	0.00151815	0.0264551
UBE2D2	ENSG00000131508	513.845	-0.663059	0.209116	-3.17077	0.00152037	0.0264577
UBE2A	ENSG00000077721	352.789	-0.776576	0.245085	-3.1686	0.00153174	0.0265833
ATP5J	ENSG00000154723	1182.88	-0.618081	0.195063	-3.16862	0.00153164	0.0265833
ANTXR2	ENSG00000163297	40.5586	1.30552	0.412197	3.16723	0.001539	0.0266371
DUSP1	ENSG00000120129	115.18	-1.03077	0.325412	-3.16759	0.00153707	0.0266371
CDC45	ENSG00000093009	86.6462	0.798294	0.252099	3.16659	0.00154237	0.026639
POLDIP3	ENSG00000100227	63.4594	0.966259	0.305158	3.16642	0.00154327	0.026639
RNF185	ENSG00000138942	35.1118	1.17959	0.372635	3.16554	0.00154796	0.0266841
PLXNA1	ENSG00000114554	74.3614	1.38715	0.438773	3.16143	0.00156994	0.0269706
CCBL1	ENSG00000171097	21.0487	1.51153	0.47814	3.16127	0.00157085	0.0269706
ZNF384	ENSG00000126746	53.346	0.957495	0.302917	3.16091	0.00157275	0.0269706
HIRA	ENSG00000100084	43.0566	1.03991	0.328997	3.16087	0.00157301	0.0269706
TSEN15	ENSG00000198860	92.4078	-0.971038	0.307402	-3.15886	0.00158389	0.0270487
CDCP1	ENSG00000163814	20.394	1.77188	0.560902	3.15898	0.00158322	0.0270487
NAE1	ENSG00000159593	203.808	-0.899332	0.284663	-3.15928	0.00158159	0.0270487
PRUNE2	ENSG00000106772	9.67503	2.23084	0.706926	3.15568	0.00160122	0.0272856
SERPINB2	ENSG00000197632	49.5896	3.34692	1.06066	3.1555	0.00160221	0.0272856
C19orf38	ENSG00000214212	4.89246	4.25714	1.34927	3.15515	0.00160416	0.0272856
SKP1	ENSG00000113558	1018.66	-0.925796	0.293554	-3.15376	0.00161184	0.02738
GOLM1	ENSG00000135052	136.358	0.819532	0.259954	3.1526	0.00161823	0.027452
VDAC1	ENSG00000213585	559.83	-0.861079	0.273281	-3.15089	0.00162772	0.0275765
SREBF1	ENSG00000072310	69.6051	0.984428	0.312493	3.15024	0.00163139	0.0276022
IFIT1	ENSG00000185745	6.24472	-2.93991	0.933391	-3.1497	0.00163436	0.0276159
ARL8B	ENSG00000134108	51.6889	-0.888809	0.28271	-3.14389	0.0016672	0.0278787
DNAJB11	ENSG00000090520	250.664	-0.77643	0.246875	-3.14503	0.00166067	0.0278787
GAK	ENSG00000178950	69.7603	0.922429	0.293367	3.14429	0.00166492	0.0278787
NAT1	ENSG00000171428	3.8342	-3.64314	1.15841	-3.14495	0.00166115	0.0278787
RP11-865I6.2	ENSG00000254337	2.57291	-4.48141	1.4254	-3.14396	0.00166677	0.0278787
BAG3	ENSG00000151929	154.858	0.689165	0.219209	3.14386	0.00166732	0.0278787
MLXIP	ENSG00000175727	81.1974	0.856275	0.272232	3.14538	0.00165869	0.0278787
MAPRE2	ENSG00000166974	138.008	-0.657133	0.208917	-3.14543	0.00165841	0.0278787
ARL9	ENSG00000196503	5.49575	-3.07477	0.978195	-3.14331	0.00167048	0.0278951
TUBGCP6	ENSG00000128159	19.6155	1.49916	0.477461	3.13986	0.00169027	0.0281888
EMP3	ENSG00000142227	1081.73	-0.656386	0.209075	-3.13948	0.00169249	0.028189
PCNP	ENSG00000081154	360.21	-0.620656	0.197999	-3.13464	0.00172062	0.0286205
CLCN7	ENSG00000103249	74.6164	0.971036	0.309833	3.13406	0.00172404	0.0286401
SAMD9	ENSG00000205413	11.7074	-2.04822	0.654783	-3.12808	0.00175949	0.0291158
BRD1	ENSG00000100425	25.1239	1.29075	0.412604	3.1283	0.00175823	0.0291158
TRABD	ENSG00000170638	104.193	0.897865	0.286982	3.12864	0.00175614	0.0291158
PDCD5	ENSG00000105185	1258.5	-0.530691	0.169724	-3.1268	0.00176722	0.0292058
PGD	ENSG00000142657	215.723	0.667208	0.213438	3.12601	0.00177199	0.029233
UBE2D3	ENSG00000109332	417.438	-0.617002	0.197392	-3.12577	0.00177342	0.029233
MSRB1	ENSG00000198736	156.213	-0.701604	0.224559	-3.12436	0.00178191	0.0292974
ARHGEF18	ENSG00000104880	86.1155	0.883793	0.282853	3.12456	0.00178069	0.0292974
RBMX	ENSG00000147274	346.237	-0.557186	0.178512	-3.12128	0.00180064	0.0295498
SSSCA1	ENSG00000173465	362.183	-0.770779	0.246959	-3.12108	0.00180187	0.0295498
VEGFC	ENSG00000150630	41.2515	1.21939	0.390946	3.11908	0.00181414	0.0297129
UBE2N	ENSG00000177889	360.532	-0.666081	0.213618	-3.1181	0.00182021	0.0297743
RDH14	ENSG00000240857	90.5904	-0.827421	0.265578	-3.11555	0.00183602	0.0299564
GATAD2A	ENSG00000167491	126.241	0.742439	0.238298	3.11559	0.00183579	0.0299564
STEAP3	ENSG00000115107	54.1448	1.01077	0.324588	3.11401	0.00184563	0.0300749
SLC4A2	ENSG00000164889	103.383	0.782895	0.251475	3.11322	0.0018506	0.0301175
ZBTB18	ENSG00000179456	27.1201	-1.19472	0.383844	-3.11252	0.00185496	0.0301502
PAPSS1	ENSG00000138801	49.3104	-1.10221	0.354562	-3.10866	0.00187937	0.0305082
IFI6	ENSG00000126709	34.9942	-1.08593	0.349664	-3.10564	0.00189867	0.0306661
ENO2	ENSG00000111674	79.4068	1.01521	0.326844	3.10611	0.00189566	0.0306661
NUDT15	ENSG00000136159	72.4093	-1.03074	0.331884	-3.10571	0.00189823	0.0306661
COL1A1	ENSG00000108821	1150.89	-0.760993	0.245031	-3.1057	0.00189826	0.0306661
FAM102A	ENSG00000167106	39.7383	1.22166	0.393737	3.10272	0.00191751	0.0309313
CYB5RL	ENSG00000215883	44.4528	0.981374	0.316423	3.10147	0.00192565	0.0310235
C21orf59	ENSG00000159079	150.963	-0.835104	0.269436	-3.09945	0.00193881	0.0311964
DIMT1	ENSG00000086189	102.451	-0.890756	0.287522	-3.09805	0.00194801	0.0313051
SOD1	ENSG00000142168	1398.69	-0.687435	0.221974	-3.09691	0.00195547	0.0313855
NUP214	ENSG00000126883	71.9667	0.814805	0.263354	3.09396	0.00197507	0.0316586
NSFL1C	ENSG00000088833	313.132	-0.622494	0.20122	-3.0936	0.00197743	0.0316586
DCUN1D5	ENSG00000137692	258.421	-0.964844	0.31203	-3.09216	0.00198708	0.0317735
RBM10	ENSG00000182872	116.413	0.739897	0.239391	3.09074	0.00199657	0.0318854
FSTL3	ENSG00000070404	103.322	-1.06685	0.345222	-3.09031	0.00199945	0.0318916
TMEM25	ENSG00000149582	14.4252	-1.81695	0.588254	-3.08872	0.00201023	0.0320237
TP53I11	ENSG00000175274	1.9755	-4.88817	1.58324	-3.08744	0.00201885	0.0321211
C19orf73	ENSG00000221916	10.6705	-1.75964	0.570217	-3.08592	0.00202923	0.0322462
PRRC2A	ENSG00000204469	198.822	0.800815	0.259645	3.08427	0.00204055	0.0323858
TMED10	ENSG00000170348	202.566	-0.775795	0.251829	-3.08064	0.00206558	0.0327174
VPS35	ENSG00000069329	174.373	-0.594415	0.192961	-3.0805	0.00206655	0.0327174
SUCLG1	ENSG00000163541	254.273	-0.881583	0.286433	-3.0778	0.00208538	0.0328263
WDR41	ENSG00000164253	33.773	-1.06818	0.347021	-3.07813	0.00208303	0.0328263
SRA1	ENSG00000213523	426.166	-0.543782	0.176653	-3.07826	0.00208216	0.0328263
LRRC8A	ENSG00000136802	90.5685	0.926883	0.301182	3.07749	0.00208753	0.0328263
PFKFB3	ENSG00000170525	21.1031	1.45567	0.473127	3.0767	0.00209308	0.0328263
VPS26A	ENSG00000122958	144.125	-0.921556	0.299561	-3.07636	0.00209547	0.0328263
CTTN	ENSG00000085733	186.118	0.763793	0.248072	3.07891	0.00207758	0.0328263
HERPUD1	ENSG00000051108	224.048	-1.07703	0.350117	-3.07621	0.0020965	0.0328263
CNFN	ENSG00000105427	3.65872	-3.62008	1.17655	-3.07687	0.0020919	0.0328263
CAMKK1	ENSG00000004660	12.9886	1.73225	0.563824	3.07233	0.00212398	0.033216
PHC2	ENSG00000134686	115.244	0.81193	0.264523	3.06942	0.00214476	0.0335001
PDE1C	ENSG00000154678	11.2821	-2.1313	0.694826	-3.06738	0.00215942	0.0336646
CREB3L2	ENSG00000182158	67.685	0.821611	0.267882	3.06706	0.00216174	0.0336646
DUSP9	ENSG00000130829	2.03247	-4.92318	1.60545	-3.06653	0.00216557	0.0336646
CXCL16	ENSG00000161921	5.15294	-2.78551	0.908367	-3.0665	0.00216581	0.0336646
PRSS12	ENSG00000164099	11.5409	2.23836	0.730062	3.06598	0.00216956	0.0336821
NT5C3A	ENSG00000122643	66.7556	-0.837868	0.27361	-3.06228	0.00219661	0.0340195
C8orf48	ENSG00000164743	1.85767	-4.81624	1.57268	-3.06244	0.00219537	0.0340195
HMGXB4	ENSG00000100281	157.668	0.774517	0.252972	3.06167	0.00220107	0.0340474
WDR34	ENSG00000119333	598.259	0.531878	0.173777	3.06069	0.00220824	0.0341172
STAT6	ENSG00000166888	24.1587	1.26942	0.415086	3.05821	0.00222663	0.0343599
TONSL	ENSG00000160949	61.2152	0.959632	0.313852	3.0576	0.0022312	0.034389
F12	ENSG00000131187	12.3205	-1.74399	0.570785	-3.05543	0.00224739	0.03457
DLK2	ENSG00000171462	4.8792	-3.00452	0.98338	-3.0553	0.00224834	0.03457
SLC35B2	ENSG00000157593	187.447	0.607885	0.199251	3.05085	0.00228196	0.0350266
TNFRSF21	ENSG00000146072	54.6879	0.918853	0.3012	3.05064	0.00228351	0.0350266
HSF1	ENSG00000185122	223.705	0.668519	0.219381	3.04729	0.00230915	0.0353521
SYCE1L	ENSG00000205078	34.7313	1.28912	0.423059	3.04715	0.00231025	0.0353521
GNAI3	ENSG00000065135	127.995	-0.919963	0.30228	-3.04341	0.00233912	0.0357476
PSMD4	ENSG00000159352	556.963	-0.62793	0.206349	-3.04305	0.00234196	0.0357476
SAYSD1	ENSG00000112167	45.8794	-0.900245	0.295868	-3.04272	0.00234447	0.0357476
SGSM2	ENSG00000141258	34.4991	1.24029	0.407726	3.04197	0.00235036	0.0357948
TRIM58	ENSG00000162722	19.4223	-1.47425	0.484962	-3.03993	0.00236631	0.0359949
TAGLN2	ENSG00000158710	2938.53	-0.91053	0.299561	-3.03955	0.0023693	0.0359976
C6orf132	ENSG00000188112	12.1138	-1.63345	0.537587	-3.03848	0.00237776	0.0360833
NRG1	ENSG00000157168	90.6858	0.801323	0.263788	3.03776	0.00238346	0.036127
DBNL	ENSG00000136279	182.653	-0.757599	0.249821	-3.03257	0.0024248	0.0366383
UBAP1	ENSG00000165006	50.5091	1.02617	0.338379	3.0326	0.0024246	0.0366383
H2AFJ	ENSG00000246705	137.698	-0.614635	0.202686	-3.03245	0.00242577	0.0366383
FAM169A	ENSG00000198780	3.41209	-4.16026	1.37248	-3.0312	0.00243587	0.0367475
SH2B1	ENSG00000178188	54.7787	0.928968	0.306631	3.0296	0.00244878	0.0368988
NINJ1	ENSG00000131669	322.109	0.966379	0.319088	3.02856	0.00245722	0.0369824
TMEM123	ENSG00000152558	308.553	-0.82601	0.272926	-3.0265	0.00247402	0.0371916
TRIM38	ENSG00000112343	10.7192	2.42237	0.800488	3.02612	0.00247712	0.0371945
THAP10	ENSG00000129028	12.0604	-1.69252	0.559838	-3.02323	0.00250094	0.0375083
CLDN11	ENSG00000013297	164.861	1.05738	0.350065	3.02052	0.00252337	0.0378005
UCP2	ENSG00000175567	136.541	-0.61871	0.205143	-3.016	0.00256137	0.0383248
TMEM9B	ENSG00000175348	84.0198	-0.833882	0.276542	-3.01539	0.00256651	0.0383568
KLHL35	ENSG00000149243	57.6737	-1.18772	0.394056	-3.01408	0.00257756	0.0384771
CRIP2	ENSG00000182809	213.342	-0.842561	0.279991	-3.00924	0.00261903	0.0390506
COBLL1	ENSG00000082438	26.1268	1.23476	0.410666	3.00672	0.0026408	0.0393295
THEM6	ENSG00000130193	93.8445	0.837713	0.278664	3.00618	0.00264553	0.0393542
ACP1	ENSG00000143727	764.336	-0.532023	0.177206	-3.00228	0.00267963	0.039769
PNKD	ENSG00000127838	489.255	0.611925	0.203798	3.0026	0.00267681	0.039769
KIAA0100	ENSG00000007202	159.39	0.801054	0.266898	3.00135	0.00268781	0.0398444
C16orf80	ENSG00000070761	262.327	-0.641854	0.213901	-3.00071	0.00269353	0.039848
GINS2	ENSG00000131153	726.9	-0.533163	0.177684	-3.00062	0.00269428	0.039848
KLHL7	ENSG00000122550	83.7687	-0.891296	0.297511	-2.99584	0.00273691	0.0404073
TOP3A	ENSG00000177302	46.3203	0.986874	0.329433	2.99567	0.00273841	0.0404073
LINC00342	ENSG00000232931	18.2443	1.58582	0.529485	2.99503	0.00274416	0.0404456
CRISPLD2	ENSG00000103196	11.4009	-1.88286	0.628814	-2.99431	0.00275067	0.0404949
PLEKHM2	ENSG00000116786	76.3913	0.758588	0.253473	2.99277	0.00276454	0.0406524
RIOK2	ENSG00000058729	44.8951	-1.21662	0.406741	-2.99115	0.00277932	0.0408229
LGMN	ENSG00000100600	30.7236	-1.26693	0.424006	-2.988	0.00280811	0.0411985
TIMM50	ENSG00000105197	191.411	-0.605466	0.202733	-2.98653	0.00282164	0.0413497
RHBDD2	ENSG00000005486	86.5932	-0.802537	0.268773	-2.98593	0.00282714	0.0413829
RAB3B	ENSG00000169213	226.57	-0.552807	0.185186	-2.98515	0.00283438	0.0414415
TRMT2A	ENSG00000099899	72.9137	0.854461	0.286307	2.98442	0.00284114	0.041493
LONP1	ENSG00000196365	113.136	0.761764	0.255606	2.98023	0.00288031	0.0420171
ANAPC1	ENSG00000153107	57.8894	0.828823	0.27817	2.97956	0.00288664	0.04203
MGST1	ENSG00000008394	383.477	1.17476	0.39429	2.97944	0.00288776	0.04203
RP11-818F20.5	ENSG00000257732	19.793	1.57697	0.52952	2.97812	0.00290023	0.0421637
CHD3	ENSG00000170004	161.327	0.823419	0.276752	2.97529	0.00292712	0.0425063
IL32	ENSG00000008517	68.7537	-1.23622	0.41555	-2.9749	0.00293086	0.0425124
DGCR6L	ENSG00000128185	306.091	0.670011	0.225395	2.97261	0.00295277	0.0427817
GNPDA2	ENSG00000163281	35.5528	-1.07937	0.363316	-2.9709	0.00296932	0.042973
SERTAD2	ENSG00000179833	49.4769	1.08682	0.366011	2.96937	0.00298408	0.043024
RUSC2	ENSG00000198853	48.7174	1.0746	0.361884	2.96945	0.00298335	0.043024
RP11-211G23.2	ENSG00000260877	2.80456	4.46243	1.50293	2.96915	0.00298628	0.043024
MRPL39	ENSG00000154719	79.873	-1.08262	0.364498	-2.97017	0.00297639	0.043024
HLA-B	ENSG00000234745	326.869	0.677033	0.228057	2.96871	0.00299057	0.0430373
CGREF1	ENSG00000138028	3.88466	-3.30296	1.11305	-2.96749	0.00300242	0.043111
RPL7A	ENSG00000148303	8695.15	0.494241	0.166545	2.96762	0.00300113	0.043111
INA	ENSG00000148798	160.376	-0.675491	0.227774	-2.96562	0.00302072	0.0433252
SLC4A4	ENSG00000080493	11.0611	-1.74347	0.588008	-2.96504	0.00302644	0.0433586
ABLIM3	ENSG00000173210	36.1018	1.09976	0.371043	2.96398	0.00303689	0.0434253
FOXS1	ENSG00000179772	9.94001	-1.85858	0.627076	-2.96388	0.00303787	0.0434253
RAB5A	ENSG00000144566	98.0256	-0.847983	0.286228	-2.96262	0.00305036	0.0435552
TRIM36	ENSG00000152503	4.20639	-2.99558	1.0115	-2.96153	0.00306116	0.0436299
GJA1	ENSG00000152661	180.697	-0.860473	0.290563	-2.9614	0.00306241	0.0436299
KANK2	ENSG00000197256	150.835	0.840427	0.28393	2.95998	0.00307662	0.0437837
GOLGA7	ENSG00000147533	134.6	-0.718842	0.242989	-2.95834	0.00309304	0.0439199
KLRC2	ENSG00000205809	3.62032	4.81058	1.62593	2.95866	0.00308984	0.0439199
C4orf48	ENSG00000243449	464.071	-0.764679	0.258522	-2.95789	0.00309754	0.0439247
MAP1A	ENSG00000166963	45.201	1.03062	0.348464	2.95762	0.00310025	0.0439247
UCHL5	ENSG00000116750	104.947	-0.917884	0.31051	-2.95605	0.00311604	0.0440998
DNAH14	ENSG00000185842	25.7421	-1.11858	0.378489	-2.95538	0.00312288	0.0441478
TBCE	ENSG00000116957	25.7802	-1.17428	0.397574	-2.95362	0.00314071	0.0443509
MOB1A	ENSG00000114978	156.631	-0.744412	0.252079	-2.95309	0.0031461	0.0443614
PPFIBP1	ENSG00000110841	169.772	0.872027	0.295315	2.95287	0.00314838	0.0443614
LETM1	ENSG00000168924	73.3104	0.955744	0.323783	2.9518	0.00315927	0.044417
CRYZL1	ENSG00000205758	57.894	-0.861481	0.291821	-2.95209	0.00315635	0.044417
REEP3	ENSG00000165476	158.309	-0.653398	0.221483	-2.95011	0.00317661	0.0446119
RNF114	ENSG00000124226	194.513	-0.657112	0.222783	-2.94956	0.00318232	0.044643
SMIM11	ENSG00000205670	194.809	-0.63168	0.21423	-2.94861	0.00319202	0.0447302
BTG1	ENSG00000133639	233.746	0.688063	0.233559	2.94599	0.00321925	0.0450624
BCAP31	ENSG00000185825	667.599	-0.495306	0.168182	-2.94507	0.00322884	0.0450981
ETFA	ENSG00000140374	164.958	-0.900464	0.305733	-2.94526	0.00322685	0.0450981
SLIT2	ENSG00000145147	21.1751	1.45292	0.493536	2.9439	0.00324101	0.0452189
SRCAP	ENSG00000080603	56.7877	0.87222	0.296432	2.9424	0.0032568	0.0453897
SH3BGRL3	ENSG00000142669	4676.48	-0.568065	0.193153	-2.94102	0.00327136	0.045543
GFOD1	ENSG00000145990	4.89391	-2.70783	0.921237	-2.93934	0.00328912	0.0457233
CCT8	ENSG00000156261	365.523	-1.01427	0.345095	-2.93912	0.00329145	0.0457233
CDK1	ENSG00000170312	130.688	-0.892858	0.30385	-2.93848	0.00329822	0.0457677
TELO2	ENSG00000100726	74.316	0.906717	0.308636	2.93782	0.00330527	0.0458159
PIGM	ENSG00000143315	12.3205	-1.6137	0.550107	-2.93343	0.00335242	0.0463767
UBXN6	ENSG00000167671	105.14	0.677117	0.230832	2.93338	0.00335297	0.0463767
HNRNPH3	ENSG00000096746	453.692	-0.599588	0.204489	-2.93213	0.00336651	0.0465137
SGOL1	ENSG00000129810	44.3817	-0.979335	0.334143	-2.93089	0.00337997	0.0466494
CCDC28B	ENSG00000160050	170.757	-0.698762	0.238487	-2.92997	0.00338989	0.0467207
CTD-2127H9.1	ENSG00000249740	7.74894	2.54798	0.869696	2.92974	0.00339243	0.0467207
MFSD12	ENSG00000161091	133.32	0.776538	0.265141	2.92877	0.00340304	0.0468165
PGPEP1	ENSG00000130517	50.5614	1.13824	0.388697	2.92836	0.00340759	0.0468288
CLPTM1L	ENSG00000049656	219.379	0.554299	0.18939	2.92676	0.00342514	0.0469282
DLG3	ENSG00000082458	3.01539	-3.95089	1.34995	-2.9267	0.00342581	0.0469282
PREX1	ENSG00000124126	15.9589	1.64468	0.561938	2.9268	0.00342464	0.0469282
SELT	ENSG00000198843	454.082	-0.691576	0.236333	-2.92628	0.00343043	0.0469412
GLYR1	ENSG00000140632	79.1947	0.743808	0.254262	2.92536	0.00344059	0.0470299
HSPBP1	ENSG00000133265	118.319	-0.678055	0.231846	-2.92459	0.00344906	0.0470955
LAMA3	ENSG00000053747	13.7457	1.61346	0.551969	2.9231	0.00346561	0.0472207
TSPO	ENSG00000100300	2080.24	0.569421	0.194787	2.9233	0.00346343	0.0472207
NPC1	ENSG00000141458	42.1592	1.08166	0.370201	2.92181	0.00347998	0.0473662
UBE2E1	ENSG00000170142	141.498	-0.672539	0.230281	-2.92051	0.00349459	0.0475146
NAPRT1	ENSG00000147813	23.5643	1.32727	0.454593	2.91968	0.00350392	0.0475909
GPANK1	ENSG00000204438	191.565	0.639868	0.219188	2.91926	0.0035086	0.0476039
ETV1	ENSG00000006468	24.9581	1.57145	0.538572	2.91781	0.003525	0.0477759
PATZ1	ENSG00000100105	28.5158	1.15468	0.395881	2.91673	0.00353721	0.0478906
CFL1	ENSG00000172757	5742.71	-0.65152	0.223434	-2.91594	0.00354619	0.0479615
SMYD3	ENSG00000185420	42.4174	-0.930467	0.319193	-2.91506	0.00355617	0.0480458
CCL26	ENSG00000006606	7.32561	-2.17205	0.745663	-2.91292	0.0035807	0.0482753
VAC14	ENSG00000103043	51.6077	0.896305	0.307684	2.91307	0.00357889	0.0482753
ERVMER34-1	ENSG00000226887	1.89202	-4.81489	1.65358	-2.9118	0.00359351	0.0483463
PPP1CA	ENSG00000172531	638.564	-0.551041	0.189237	-2.91191	0.00359228	0.0483463
TBC1D14	ENSG00000132405	54.8977	0.81202	0.278986	2.91061	0.0036072	0.0483559
C7orf69	ENSG00000136275	2.35663	-4.32756	1.48668	-2.91088	0.00360413	0.0483559
BRSK2	ENSG00000174672	1.71916	-4.69932	1.61444	-2.91081	0.00360499	0.0483559
GTSE1	ENSG00000075218	75.1674	0.769388	0.264356	2.91043	0.00360933	0.0483559
POLR3A	ENSG00000148606	64.2839	0.908843	0.312316	2.91001	0.00361414	0.0483697
SDHC	ENSG00000143252	377.593	-0.789309	0.271296	-2.9094	0.0036212	0.0484138
RP11-417E7.1	ENSG00000223485	14.206	1.77774	0.611246	2.90839	0.00363293	0.0485199
PLEKHF2	ENSG00000175895	29.0389	-1.02401	0.352163	-2.90777	0.0036402	0.0485663
KDM5B	ENSG00000117139	22.3348	-1.35257	0.465369	-2.90645	0.00365556	0.0487206
PRPF31	ENSG00000105618	187.196	-0.622512	0.2143	-2.90486	0.00367421	0.0489181
CENPH	ENSG00000153044	186.273	-0.707943	0.243786	-2.90395	0.00368485	0.0490089
RP13-582O9.5	ENSG00000253716	43.1294	1.21745	0.419368	2.90306	0.00369539	0.049098
ALDH7A1	ENSG00000164904	68.7209	-0.854554	0.294417	-2.90253	0.00370162	0.0491294
HMGB3	ENSG00000029993	187.803	-0.665151	0.229188	-2.90221	0.00370542	0.0491294
YWHAB	ENSG00000166913	1047.05	-0.544676	0.187717	-2.90158	0.00371281	0.0491765
TMEM66	ENSG00000133872	309.225	-0.646902	0.223002	-2.90089	0.00372107	0.049235
RDH13	ENSG00000160439	10.898	-1.58665	0.547016	-2.90056	0.003725	0.0492361
YBX2	ENSG00000006047	7.03127	-2.15517	0.744023	-2.89664	0.00377182	0.0498035
MCM2	ENSG00000073111	221.965	0.564843	0.195118	2.89489	0.00379297	0.049999
BICD2	ENSG00000185963	60.9973	0.79926	0.276105	2.89476	0.00379443	0.049999
MNT	ENSG00000070444	34.2664	1.0369	0.358273	2.89417	0.00380157	0.0500417
RALYL	ENSG00000184672	3.18832	4.62757	1.59951	2.89312	0.00381442	0.0501077
THAP7	ENSG00000184436	328.529	0.56914	0.196715	2.89323	0.00381304	0.0501077
CCL2	ENSG00000108691	39.8385	-5.55503	1.92077	-2.89209	0.00382689	0.0502201
COX6B1	ENSG00000126267	1422.2	-0.579598	0.200498	-2.8908	0.00384265	0.0503753
SVIL	ENSG00000197321	113.151	1.13679	0.393293	2.89045	0.00384695	0.0503801
PSD3	ENSG00000156011	46.5038	0.95042	0.328923	2.88949	0.00385866	0.0504819
CCDC107	ENSG00000159884	189.553	0.682802	0.236378	2.8886	0.00386961	0.0505734
NRP1	ENSG00000099250	139.95	0.695843	0.240939	2.88805	0.00387643	0.050611
ASB9	ENSG00000102048	5.44052	3.48372	1.20672	2.88694	0.00389004	0.0506468
CDKN2B	ENSG00000147883	42.6273	-1.13058	0.391547	-2.88747	0.00388356	0.0506468
PEMT	ENSG00000133027	57.5439	-0.914819	0.31689	-2.88686	0.00389104	0.0506468
ZCCHC24	ENSG00000165424	36.5134	1.16672	0.404311	2.88569	0.00390555	0.0507325
ZG16B	ENSG00000162078	5.22003	-2.61574	0.906414	-2.88581	0.00390406	0.0507325
PPIH	ENSG00000171960	133.104	-0.740021	0.256522	-2.88482	0.00391632	0.050817
TSG101	ENSG00000074319	153.214	-0.825082	0.286037	-2.88453	0.00391998	0.050817
SKAP2	ENSG00000005020	9.10234	-2.05063	0.711199	-2.88334	0.00393484	0.0509579
GPR3	ENSG00000181773	12.62	1.84266	0.640005	2.87913	0.00398776	0.0514358
SRSF7	ENSG00000115875	956.525	-0.517141	0.179616	-2.87915	0.00398748	0.0514358
MED22	ENSG00000148297	47.5149	0.907126	0.315038	2.87942	0.00398413	0.0514358
MRPL21	ENSG00000197345	426.458	-0.675774	0.234715	-2.87913	0.0039878	0.0514358
SLC35A1	ENSG00000164414	10.4472	-1.6417	0.570304	-2.87865	0.00399387	0.0514622
NOL12	ENSG00000100101	204.214	0.596871	0.207466	2.87695	0.00401533	0.0516868
EIF4E2	ENSG00000135930	301.682	-0.622786	0.216527	-2.87626	0.00402424	0.0516976
PACSIN3	ENSG00000165912	155.922	-0.718008	0.249631	-2.87628	0.00402391	0.0516976
DHX38	ENSG00000140829	105.87	0.692637	0.240935	2.87479	0.00404291	0.0518853
ELTD1	ENSG00000162618	57.5762	0.898737	0.312725	2.87389	0.00405449	0.0519819
TNRC6B	ENSG00000100354	74.407	0.734424	0.255892	2.87005	0.00410407	0.0525649
FANCA	ENSG00000187741	128.256	0.613484	0.213798	2.86945	0.00411185	0.0526119
EVC2	ENSG00000173040	1.66608	-4.66297	1.62698	-2.86602	0.00415662	0.0528679
RFK	ENSG00000135002	138.422	0.704346	0.245644	2.86735	0.00413927	0.0528679
RP11-525A16.4	ENSG00000273143	27.1783	1.25092	0.436374	2.86661	0.00414893	0.0528679
PTMS	ENSG00000159335	1392.13	-0.44778	0.156223	-2.86628	0.00415322	0.0528679
INO80	ENSG00000128908	48.878	0.890375	0.310564	2.86697	0.00414428	0.0528679
CSK	ENSG00000103653	64.3229	0.878454	0.306493	2.86615	0.00415503	0.0528679
DNAJC15	ENSG00000120675	3.35414	-4.09009	1.42837	-2.86347	0.00419034	0.0532439
CTA-384D8.36	ENSG00000272821	10.5658	2.10376	0.734911	2.86261	0.00420172	0.0533356
ANP32B	ENSG00000136938	982.715	0.443818	0.155086	2.86175	0.00421309	0.0534269
PPP2R5D	ENSG00000112640	40.5817	0.939348	0.328414	2.86025	0.00423301	0.0536265
STARD3NL	ENSG00000010270	146.33	-0.686724	0.240185	-2.85915	0.00424782	0.0536617
ARMC1	ENSG00000104442	97.438	-0.71769	0.251046	-2.85879	0.00425255	0.0536617
ZNF646	ENSG00000167395	15.0395	1.54821	0.541448	2.85939	0.00424461	0.0536617
BCAT2	ENSG00000105552	61.8779	-0.827865	0.289561	-2.85903	0.00424933	0.0536617
TMED7	ENSG00000134970	69.5965	-0.912909	0.319529	-2.85705	0.004276	0.0539045
FGFRL1	ENSG00000127418	71.1172	0.840805	0.294563	2.85442	0.00431159	0.0542998
ITGA3	ENSG00000005884	355.985	0.630011	0.220775	2.85363	0.00432227	0.0543807
ZFHX4-AS1	ENSG00000253661	42.0301	-1.14367	0.401213	-2.85052	0.00436477	0.054777
PAFAH1B3	ENSG00000079462	491.282	-0.549279	0.192703	-2.85039	0.00436659	0.054777
PVR	ENSG00000073008	96.253	-0.810615	0.284333	-2.85093	0.00435911	0.054777
ZNF530	ENSG00000183647	17.6827	-1.25068	0.438952	-2.84924	0.00438243	0.0549218
RPL8	ENSG00000161016	15752.2	0.417733	0.146639	2.84871	0.0043897	0.0549447
EIF2S2	ENSG00000125977	1469.32	-0.600958	0.210975	-2.84848	0.00439283	0.0549447
NFATC2IP	ENSG00000176953	109.171	0.661743	0.232348	2.84807	0.00439852	0.0549622
SFXN3	ENSG00000107819	46.8614	1.02995	0.361688	2.84762	0.00440474	0.0549863
SUN2	ENSG00000100242	70.6387	0.903284	0.317366	2.84619	0.00442452	0.0551794
MAP7D1	ENSG00000116871	308.108	0.513004	0.180321	2.84496	0.00444174	0.0553208
LAMA4	ENSG00000112769	108.531	2.19648	0.772116	2.84476	0.00444449	0.0553208
ACTB	ENSG00000075624	7327.89	-0.589694	0.207625	-2.84018	0.00450882	0.056067
GTPBP2	ENSG00000172432	35.3287	1.08519	0.382391	2.83789	0.00454121	0.056415
INPP1	ENSG00000151689	76.8945	0.793714	0.279799	2.83673	0.00455787	0.0565671
EPHB2	ENSG00000133216	100.297	-0.800578	0.282528	-2.83362	0.00460236	0.056789
ADI1	ENSG00000182551	620.003	-0.583891	0.206013	-2.83425	0.00459341	0.056789
REPIN1	ENSG00000214022	59.3501	0.838096	0.295706	2.83422	0.00459381	0.056789
AGPAT6	ENSG00000158669	84.9479	0.744834	0.26283	2.8339	0.00459842	0.056789
KPNB1	ENSG00000108424	689.225	0.465612	0.164289	2.83411	0.00459539	0.056789
SLC27A5	ENSG00000083807	47.5505	-1.17474	0.414563	-2.83369	0.0046014	0.056789
STMN1	ENSG00000117632	1778.3	-0.899839	0.317595	-2.83329	0.00460718	0.0567939
MARCH5	ENSG00000198060	98.3751	-0.822159	0.290275	-2.83235	0.00462075	0.0569063
AP1M1	ENSG00000072958	106.437	0.684699	0.24178	2.8319	0.00462718	0.0569308
SLC25A1	ENSG00000100075	229.431	0.711576	0.251327	2.83128	0.00463626	0.0569877
SAAL1	ENSG00000166788	66.262	-1.11318	0.393395	-2.82967	0.00465956	0.0572192
ZNF273	ENSG00000198039	11.3896	-1.70859	0.604476	-2.82657	0.00470501	0.0575136
CAV1	ENSG00000105974	2833.91	0.689649	0.244047	2.82589	0.00471497	0.0575136
SRPX2	ENSG00000102359	22.8375	1.2064	0.426904	2.82594	0.00471424	0.0575136
NFX1	ENSG00000086102	62.0273	0.783409	0.277225	2.82589	0.00471487	0.0575136
SEC24C	ENSG00000176986	96.2599	0.710948	0.25152	2.82661	0.00470438	0.0575136
DYRK4	ENSG00000010219	121.823	-0.786349	0.278098	-2.82759	0.00468996	0.0575136
HSF4	ENSG00000102878	16.4586	1.40613	0.497325	2.82738	0.00469306	0.0575136
RTN4	ENSG00000115310	969.118	-0.723014	0.255932	-2.82502	0.00472772	0.0575865
PRDX3	ENSG00000165672	721.639	-0.69194	0.244946	-2.82487	0.00472994	0.0575865
TSC1	ENSG00000165699	30.4911	1.12377	0.397877	2.82442	0.00473659	0.0576128
SNAI2	ENSG00000019549	21.8778	-1.72793	0.611873	-2.824	0.00474279	0.0576334
STARD7	ENSG00000084090	171.046	0.660031	0.233792	2.82316	0.00475528	0.0577305
FNBP1L	ENSG00000137942	27.3034	-1.18662	0.420664	-2.82083	0.0047899	0.0579887
RP11-640M9.1	ENSG00000236943	34.812	1.09574	0.388449	2.82082	0.00479013	0.0579887
MAN1B1	ENSG00000177239	110.89	0.635117	0.225143	2.82095	0.00478814	0.0579887
G0S2	ENSG00000123689	1017.41	1.92156	0.681372	2.82013	0.00480038	0.0580579
SPRYD7	ENSG00000123178	69.7294	-1.05064	0.372687	-2.8191	0.00481587	0.0581902
SMPD4	ENSG00000136699	106.982	0.741115	0.263046	2.81743	0.00484095	0.0584381
TMEM121	ENSG00000184986	10.4181	-1.97541	0.701569	-2.8157	0.00486712	0.0586988
RPF1	ENSG00000117133	133.497	-0.78508	0.278918	-2.81473	0.00488181	0.0588205
NPR3	ENSG00000113389	9.4346	-1.87244	0.665412	-2.81396	0.00489348	0.0588898
EED	ENSG00000074266	49.4058	-0.986155	0.350477	-2.81375	0.00489675	0.0588898
DBNDD1	ENSG00000003249	8.51929	-1.92281	0.683922	-2.81144	0.00493198	0.0592578
MDFIC	ENSG00000135272	78.7519	0.766319	0.272685	2.81028	0.00494991	0.0594175
BDH2	ENSG00000164039	30.9004	-1.12356	0.399928	-2.80941	0.00496328	0.0595222
PPT1	ENSG00000131238	136.535	-0.715361	0.254915	-2.80628	0.00501177	0.0600474
GSR	ENSG00000104687	52.1056	0.930468	0.331633	2.80572	0.0050205	0.0600959
GTF3C4	ENSG00000125484	72.3844	0.819989	0.292388	2.80445	0.00504021	0.0602754
FLNC	ENSG00000128591	128.98	0.832396	0.296963	2.80303	0.00506247	0.0604851
SLC39A10	ENSG00000196950	32.0391	1.0681	0.38121	2.80187	0.00508079	0.0606475
MED21	ENSG00000152944	104.393	-0.937103	0.33464	-2.80033	0.00510502	0.06088
MET	ENSG00000105976	121.988	0.707325	0.252707	2.79899	0.00512628	0.0610766
TRNP1	ENSG00000253368	5.92644	-2.24652	0.802771	-2.79846	0.00513471	0.0610768
OSGIN1	ENSG00000140961	25.7427	1.58195	0.565306	2.79839	0.00513583	0.0610768
HSD17B8	ENSG00000204228	4.10427	-2.65586	0.949322	-2.79764	0.00514771	0.0611443
CTSZ	ENSG00000101160	80.2254	-0.866996	0.309926	-2.79743	0.00515105	0.0611443
MYO1E	ENSG00000157483	44.5672	1.13319	0.405367	2.79546	0.00518259	0.0614186
RMI2	ENSG00000175643	199.724	-0.774578	0.277091	-2.79539	0.00518376	0.0614186
YIF1A	ENSG00000174851	501.833	-0.545617	0.19525	-2.79445	0.00519873	0.0615391
INSR	ENSG00000171105	1.63956	-4.61498	1.65233	-2.79301	0.00522197	0.0617572
UPP1	ENSG00000183696	829.778	-0.934711	0.334729	-2.79244	0.00523122	0.0618094
B4GALNT4	ENSG00000182272	1.63762	-4.61367	1.65256	-2.79182	0.00524118	0.06187
SH3BP4	ENSG00000130147	104.781	0.753074	0.270063	2.78851	0.00529516	0.0624497
SAR1B	ENSG00000152700	136.592	-0.815296	0.292448	-2.78784	0.00530614	0.0625216
STAMBP	ENSG00000124356	89.7661	-0.708121	0.254049	-2.78735	0.00531416	0.0625585
REXO4	ENSG00000148300	134.637	0.72103	0.258801	2.78604	0.00533556	0.0627528
SRSF2	ENSG00000161547	1009.03	-0.43531	0.156276	-2.78553	0.00534407	0.0627953
SS18	ENSG00000141380	33.257	-0.949887	0.341138	-2.78446	0.00536163	0.0628862
NAA20	ENSG00000173418	495.029	-0.712063	0.255707	-2.78469	0.00535797	0.0628862
XRCC3	ENSG00000126215	42.7174	0.922932	0.331528	2.78387	0.00537139	0.0629431
KIF3A	ENSG00000131437	36.9371	-0.977516	0.35122	-2.7832	0.00538252	0.0630158
POLR2I	ENSG00000105258	512.134	-0.536978	0.193024	-2.78192	0.00540376	0.0632067
RP5-1120P11.1	ENSG00000237686	21.781	1.22946	0.442086	2.78105	0.00541838	0.0633199
SEC61A1	ENSG00000058262	412.408	0.630804	0.226996	2.77891	0.00545408	0.0635053
TSPAN6	ENSG00000000003	41.5264	-1.00717	0.362402	-2.77915	0.00545008	0.0635053
C10orf90	ENSG00000154493	6.25898	3.03997	1.09394	2.77892	0.00545395	0.0635053
E4F1	ENSG00000167967	38.3324	0.968245	0.348316	2.77979	0.0054394	0.0635053
RPL12	ENSG00000197958	22164.7	0.610693	0.219798	2.77843	0.00546216	0.0635416
AMDHD2	ENSG00000162066	92.4383	0.67947	0.244593	2.77796	0.00547019	0.0635773
H3F3A	ENSG00000163041	2063.79	-0.720523	0.259539	-2.77616	0.00550046	0.0638133
PFKP	ENSG00000067057	210.678	0.678365	0.244328	2.77646	0.0054955	0.0638133
ADCK2	ENSG00000133597	33.1231	0.978239	0.352832	2.77253	0.00556221	0.0643629
UBE3C	ENSG00000009335	115.934	0.73841	0.266357	2.77226	0.00556692	0.0643629
RP11-390F4.6	ENSG00000236924	11.9491	1.81959	0.656433	2.77193	0.00557246	0.0643629
PLEKHG4	ENSG00000196155	52.6208	0.806285	0.290781	2.77282	0.00555726	0.0643629
KLHL22	ENSG00000099910	18.4712	1.59255	0.574532	2.7719	0.00557296	0.0643629
LRRC14	ENSG00000160959	77.6569	0.828755	0.299212	2.76979	0.00560925	0.0647237
CETN2	ENSG00000147400	181.071	-0.727632	0.262794	-2.76883	0.0056258	0.0648562
VEPH1	ENSG00000197415	10.6854	2.12675	0.768554	2.76721	0.00565376	0.0650663
ITFG1	ENSG00000129636	50.4345	-0.830359	0.300073	-2.76719	0.00565419	0.0650663
MDH1	ENSG00000014641	473.777	-0.917475	0.331629	-2.76657	0.00566491	0.0651312
KIAA1279	ENSG00000198954	84.4348	-1.01537	0.367312	-2.76433	0.005704	0.0655219
ATPAF1	ENSG00000123472	121.074	-0.609605	0.220594	-2.76347	0.00571896	0.065535
SLC2A6	ENSG00000160326	55.6336	0.926635	0.335313	2.76349	0.0057186	0.065535
GNB1L	ENSG00000185838	67.0541	0.759712	0.274921	2.76339	0.00572049	0.065535
RP11-680F8.1	ENSG00000256802	28.4504	1.16829	0.422973	2.76209	0.00574323	0.0657367
TMEM50A	ENSG00000183726	335.738	-0.591393	0.214146	-2.76164	0.00575127	0.0657698
ESAM	ENSG00000149564	2.04344	-4.13014	1.49613	-2.76055	0.00577048	0.0659307
IGFBP6	ENSG00000167779	351.03	-0.54956	0.199152	-2.7595	0.005789	0.0660833
GLYATL2	ENSG00000156689	1.63568	-4.6129	1.67199	-2.75893	0.00579906	0.0661063
RTFDC1	ENSG00000022277	361.946	-0.636529	0.230727	-2.7588	0.00580133	0.0661063
S100A11	ENSG00000163191	1282.83	-0.745641	0.270394	-2.75761	0.00582255	0.0662303
CTD-2162K18.5	ENSG00000267254	1.58454	-4.57481	1.6588	-2.7579	0.00581744	0.0662303
CHTF8	ENSG00000168802	152.486	0.5795	0.21024	2.75637	0.00584465	0.066372
N6AMT1	ENSG00000156239	42.6357	-0.932823	0.338429	-2.75633	0.00584538	0.066372
ATP5C1	ENSG00000165629	609.973	-0.690374	0.250521	-2.75576	0.00585566	0.0664298
ENPP1	ENSG00000197594	12.7094	1.70995	0.620634	2.75517	0.00586623	0.0664908
EGR1	ENSG00000120738	16.9222	-1.24765	0.453094	-2.75362	0.00589393	0.0666868
MALSU1	ENSG00000156928	244.058	-0.715653	0.259895	-2.75363	0.00589391	0.0666868
TIMP4	ENSG00000157150	7.21231	2.5091	0.911581	2.75247	0.00591479	0.0668637
OTUB1	ENSG00000167770	166.788	-0.693109	0.251923	-2.75127	0.00593646	0.0670495
KIAA1143	ENSG00000163807	84.7014	-0.959802	0.349191	-2.74864	0.00598426	0.0672582
GLT8D1	ENSG00000016864	67.3755	-0.722308	0.262759	-2.74893	0.00597893	0.0672582
PHTF2	ENSG00000006576	36.5797	-0.964071	0.350812	-2.74811	0.00599398	0.0672582
UHRF2	ENSG00000147854	65.9179	0.835892	0.304173	2.74808	0.00599459	0.0672582
TRPM3	ENSG00000083067	2.67464	4.39417	1.59932	2.74752	0.00600471	0.0672582
SNHG7	ENSG00000233016	401.827	0.670711	0.244128	2.74737	0.00600745	0.0672582
FZD8	ENSG00000177283	28.8868	1.68657	0.613874	2.74742	0.00600653	0.0672582
IMMP1L	ENSG00000148950	51.2386	-0.932716	0.339433	-2.74787	0.00599847	0.0672582
EIF2AK4	ENSG00000128829	207.867	0.671097	0.244155	2.74866	0.00598402	0.0672582
EIF4A3	ENSG00000141543	224.719	-0.745187	0.271095	-2.7488	0.00598134	0.0672582
TMED9	ENSG00000184840	1153.22	-0.616235	0.224359	-2.74664	0.0060209	0.0672912
SOD2	ENSG00000112096	158.875	0.566592	0.206281	2.7467	0.00601986	0.0672912
SEPW1	ENSG00000178980	264.86	-0.641003	0.233401	-2.74635	0.00602618	0.0672914
EGFR	ENSG00000146648	84.4608	-0.73473	0.267573	-2.74591	0.0060344	0.0673245
NPLOC4	ENSG00000182446	159.754	0.751433	0.273707	2.74539	0.00604384	0.0673712
PAIP1	ENSG00000172239	164.097	-0.651192	0.237286	-2.74434	0.00606334	0.0674986
PRDM4	ENSG00000110851	33.7729	1.02879	0.374897	2.7442	0.00606581	0.0674986
MYL12B	ENSG00000118680	1232.73	-0.782429	0.285379	-2.74171	0.00611194	0.0679528
PSMA3	ENSG00000100567	329.975	-0.780673	0.284826	-2.74087	0.00612759	0.0680678
PLEKHO2	ENSG00000241839	15.0351	1.68711	0.615759	2.73988	0.0061461	0.0681674
CHMP1A	ENSG00000131165	182.381	0.549256	0.200471	2.73982	0.0061472	0.0681674
RP11-350J20.12	ENSG00000273132	37.0906	1.50972	0.551114	2.73939	0.00615537	0.0681989
TMX1	ENSG00000139921	115.294	-0.778675	0.284282	-2.73909	0.00616095	0.0682018
P4HA2	ENSG00000072682	53.3089	-1.05511	0.385286	-2.73852	0.00617167	0.0682615
STRIP2	ENSG00000128578	9.96532	1.81917	0.664654	2.73701	0.00619995	0.0684897
EHBP1L1	ENSG00000173442	80.4446	0.776016	0.283543	2.73685	0.006203	0.0684897
PRPS1	ENSG00000147224	197.835	-0.522198	0.190845	-2.73624	0.00621456	0.0684992
LTN1	ENSG00000198862	31.0378	-0.936301	0.342157	-2.73646	0.00621039	0.0684992
HMGN2	ENSG00000198830	2829.84	-0.617116	0.225578	-2.73572	0.00622446	0.0685493
PFDN1	ENSG00000113068	405.028	-0.593109	0.216843	-2.7352	0.00623417	0.0685973
SPPL2A	ENSG00000138600	40.2127	-0.999177	0.365642	-2.73267	0.00628238	0.069026
ACSM5	ENSG00000183549	5.70566	-2.59343	0.94909	-2.73254	0.00628473	0.069026
RILP	ENSG00000167705	11.9109	-1.47601	0.540241	-2.73214	0.00629251	0.069026
MAP3K7CL	ENSG00000156265	28.7689	-1.08543	0.397298	-2.73202	0.00629469	0.069026
TCTA	ENSG00000145022	72.1895	0.743107	0.272043	2.73158	0.00630312	0.0690593
KIFC3	ENSG00000140859	244.238	0.570384	0.20892	2.73016	0.00633034	0.0692481
TXNDC17	ENSG00000129235	806.74	-0.577619	0.211573	-2.73012	0.00633116	0.0692481
RBM8A	ENSG00000131795	819.558	-0.658253	0.241394	-2.72688	0.00639371	0.0698285
CTB-171A8.1	ENSG00000266903	8.1612	2.3086	0.846633	2.7268	0.00639513	0.0698285
FAM212A	ENSG00000185614	8.21414	-1.81876	0.667112	-2.72633	0.00640437	0.0698648
GOLT1B	ENSG00000111711	193.217	-0.626698	0.229891	-2.72607	0.00640937	0.0698648
PSMC2	ENSG00000161057	275.811	-0.767005	0.281435	-2.72534	0.00642351	0.0699
HSPA13	ENSG00000155304	29.9502	-0.937852	0.34409	-2.7256	0.00641845	0.0699
FAM181B	ENSG00000182103	2.02581	-4.12824	1.51498	-2.72495	0.00643111	0.0699234
NDUFB4	ENSG00000065518	705.119	-0.477141	0.175193	-2.72351	0.00645923	0.07011
ACTL6A	ENSG00000136518	135.384	-0.729415	0.26781	-2.72363	0.00645687	0.07011
PER3	ENSG00000049246	39.5408	0.899847	0.330526	2.72247	0.00647957	0.0702423
HSPA5	ENSG00000044574	558.935	-0.868656	0.319086	-2.72233	0.00648238	0.0702423
ECH1	ENSG00000104823	210.9	-0.8748	0.321559	-2.7205	0.00651842	0.070573
TENM3	ENSG00000218336	29.6406	-1.0942	0.402529	-2.7183	0.00656179	0.0709826
LENG1	ENSG00000105617	76.0958	-0.778431	0.286412	-2.71787	0.00657034	0.0710151
XPNPEP3	ENSG00000196236	34.4814	1.1648	0.42886	2.71603	0.00660703	0.0713515
JKAMP	ENSG00000050130	56.7151	-0.800403	0.294751	-2.71553	0.00661707	0.0713997
MAPKAP1	ENSG00000119487	309.94	0.569874	0.20994	2.71446	0.00663843	0.0714496
GPR107	ENSG00000148358	55.2081	0.836257	0.308057	2.71461	0.00663529	0.0714496
ITGA7	ENSG00000135424	38.1417	1.12633	0.414936	2.71447	0.00663827	0.0714496
PIGK	ENSG00000142892	47.2505	-0.927717	0.341878	-2.71359	0.0066559	0.0715775
MRPS21	ENSG00000187145	442.399	-0.563274	0.207682	-2.71219	0.00668404	0.0718198
PTGES2	ENSG00000148334	412.273	0.614573	0.226677	2.71123	0.00670345	0.0719679
MYCBP	ENSG00000214114	72.3933	-0.747119	0.275829	-2.70863	0.00675615	0.0722796
RAB4A	ENSG00000168118	105.732	-0.683311	0.252293	-2.70841	0.0067607	0.0722796
UPRT	ENSG00000094841	22.7754	-1.23406	0.455606	-2.70862	0.00675636	0.0722796
VBP1	ENSG00000155959	378.735	-0.737948	0.272363	-2.70943	0.00673985	0.0722796
THRA	ENSG00000126351	49.633	0.899296	0.332025	2.70852	0.00675841	0.0722796
CWF19L1	ENSG00000095485	48.1651	0.919279	0.33966	2.70647	0.00680028	0.072574
FBXO3	ENSG00000110429	24.2028	-1.06342	0.392935	-2.70635	0.00680266	0.072574
CFD	ENSG00000197766	1.99413	-4.09762	1.51414	-2.70623	0.00680523	0.072574
RNF181	ENSG00000168894	415.938	-0.666241	0.246482	-2.703	0.00687167	0.0730192
CYP27A1	ENSG00000135929	1.98452	-4.09546	1.51519	-2.70293	0.00687307	0.0730192
RWDD4	ENSG00000182552	126.274	-0.59129	0.218788	-2.70257	0.00688064	0.0730192
AARS2	ENSG00000124608	10.5655	1.74729	0.64645	2.7029	0.00687372	0.0730192
SEC61G	ENSG00000132432	505.196	-0.700965	0.259373	-2.70254	0.00688118	0.0730192
CD82	ENSG00000085117	70.875	0.852366	0.315339	2.70301	0.00687144	0.0730192
PLOD1	ENSG00000083444	162.96	0.64225	0.237889	2.69978	0.00693847	0.0734456
CYP26B1	ENSG00000003137	3.737	-2.86673	1.06196	-2.69947	0.00694494	0.0734456
CTDSP1	ENSG00000144579	73.7472	0.792129	0.293451	2.69935	0.00694744	0.0734456
FAM126A	ENSG00000122591	106.872	-0.81644	0.302394	-2.69992	0.00693561	0.0734456
ARHGEF25	ENSG00000240771	1.97079	-4.09543	1.51726	-2.69923	0.00695004	0.0734456
UBE2O	ENSG00000175931	33.5401	1.21669	0.451042	2.6975	0.0069862	0.0737669
POLG	ENSG00000140521	36.8362	0.922128	0.341894	2.69711	0.00699432	0.0737918
MRGPRF	ENSG00000172935	5.06122	-2.33345	0.86537	-2.69648	0.00700767	0.0738718
ROR1	ENSG00000185483	29.026	-1.12821	0.418662	-2.69481	0.00704285	0.0741092
NDUFS3	ENSG00000213619	353.187	-0.652763	0.242244	-2.69465	0.00704625	0.0741092
PCNA	ENSG00000132646	791.055	-0.833449	0.309305	-2.69459	0.00704755	0.0741092
NBEAL2	ENSG00000160796	9.56479	1.93146	0.717245	2.69289	0.00708357	0.0743659
CHMP2B	ENSG00000083937	165.717	-0.682458	0.253416	-2.69304	0.00708046	0.0743659
KPNA2	ENSG00000182481	172.082	-0.882961	0.327947	-2.69239	0.0070943	0.0744175
UGGT1	ENSG00000136731	71.2376	0.739555	0.274766	2.69158	0.00711145	0.0745364
MAN1A1	ENSG00000111885	7.31036	2.55541	0.949644	2.69091	0.00712577	0.0746254
XRCC6	ENSG00000196419	795.183	0.513845	0.191092	2.68899	0.00716686	0.0749944
RP11-332H18.4	ENSG00000267280	24.2015	1.45263	0.540427	2.68793	0.00718954	0.0751704
MT1E	ENSG00000169715	584.58	-0.7732	0.287934	-2.68534	0.00724557	0.0756944
MRE11A	ENSG00000020922	34.8615	-1.15086	0.428718	-2.68442	0.00726559	0.0758416
CMSS1	ENSG00000184220	343.716	-0.598927	0.223197	-2.6834	0.00728768	0.0760103
CAP1	ENSG00000131236	442.498	-0.477299	0.177896	-2.68302	0.00729599	0.076035
ZNF582-AS1	ENSG00000267454	1.5787	-4.57128	1.70475	-2.68149	0.00732942	0.0763213
CHKB	ENSG00000100288	11.8828	1.68885	0.630092	2.68032	0.00735515	0.076527
MVP	ENSG00000013364	160.563	0.62638	0.233795	2.67918	0.00738029	0.0766114
C17orf51	ENSG00000212719	56.7618	0.775227	0.289357	2.67914	0.00738121	0.0766114
MAFG	ENSG00000197063	171.245	0.674825	0.251844	2.67954	0.00737238	0.0766114
KIF1C	ENSG00000129250	134.37	0.70191	0.262103	2.67799	0.00740653	0.076812
KAL1	ENSG00000011201	23.3125	-1.07558	0.401751	-2.67724	0.00742317	0.0769223
LZTS3	ENSG00000088899	4.93786	-2.26767	0.84719	-2.6767	0.00743519	0.0769846
PPA2	ENSG00000138777	115.8	-0.831337	0.310733	-2.6754	0.00746391	0.0771131
MAD2L1	ENSG00000164109	150.469	-0.92514	0.345757	-2.67569	0.00745749	0.0771131
ZDHHC24	ENSG00000174165	73.7061	-0.745653	0.278715	-2.67533	0.00746566	0.0771131
C1QBP	ENSG00000108561	1466.55	-0.516897	0.19333	-2.67365	0.00750304	0.0774367
ANGPT1	ENSG00000154188	3.58884	3.7768	1.41277	2.67333	0.00751021	0.0774483
AK2	ENSG00000004455	440.349	-0.523318	0.195825	-2.67238	0.00753155	0.0776059
ZCCHC10	ENSG00000155329	57.95	-0.840294	0.31458	-2.67116	0.00755891	0.077695
ITM2B	ENSG00000136156	229.824	-1.00154	0.374931	-2.67125	0.00755687	0.077695
FOXN3	ENSG00000053254	21.7147	1.18077	0.442106	2.67079	0.00756736	0.077695
FAM101B	ENSG00000183688	137.716	-0.605935	0.226881	-2.67071	0.00756904	0.077695
COPS3	ENSG00000141030	225.153	-0.559261	0.209431	-2.67038	0.0075766	0.077695
GDF15	ENSG00000130513	8.2442	2.93201	1.09787	2.67063	0.0075709	0.077695
TFRC	ENSG00000072274	207.631	0.524259	0.196423	2.66904	0.00760692	0.0779435
MEAF6	ENSG00000163875	255.154	-0.517723	0.193997	-2.66872	0.00761415	0.0779553
C16orf87	ENSG00000155330	87.6569	-0.643231	0.241072	-2.66821	0.00762565	0.0780106
IER5L	ENSG00000188483	65.9044	0.915443	0.343146	2.66779	0.00763515	0.0780455
LGALS3	ENSG00000131981	53.5631	-1.24704	0.467554	-2.66715	0.00764976	0.0781129
RPLP1	ENSG00000137818	15854.8	0.521965	0.195715	2.66697	0.00765394	0.0781129
FIP1L1	ENSG00000145216	86.2089	-0.709259	0.266019	-2.66619	0.00767153	0.078169
MTFR1	ENSG00000066855	80.6335	-0.667916	0.250513	-2.66619	0.00767164	0.078169
ENTPD4	ENSG00000197217	46.4574	0.837169	0.314114	2.66517	0.00769488	0.0783317
PIP5K1C	ENSG00000186111	32.4207	0.992661	0.372487	2.66496	0.00769985	0.0783317
CYR61	ENSG00000142871	1793.06	-0.580423	0.217857	-2.66424	0.00771626	0.0783443
RAC1	ENSG00000136238	1900.71	-0.49806	0.186918	-2.66459	0.00770828	0.0783443
GGT5	ENSG00000099998	8.35675	3.03139	1.13787	2.6641	0.00771943	0.0783443
IQSEC2	ENSG00000124313	26.7667	1.16426	0.437399	2.66178	0.00777279	0.0788233
RAB18	ENSG00000099246	173.861	-0.732333	0.275422	-2.65894	0.00783862	0.0794281
NPM1	ENSG00000181163	5071.74	-0.910706	0.342625	-2.65802	0.00786006	0.0795757
FBXO18	ENSG00000134452	62.6396	0.705637	0.265498	2.65778	0.00786562	0.0795757
MIB2	ENSG00000197530	42.0236	0.886561	0.333804	2.65593	0.00790903	0.0799518
MRPL42	ENSG00000198015	146.468	-0.707649	0.266573	-2.65462	0.00793982	0.0801997
AGAP3	ENSG00000133612	54.3547	0.761791	0.287046	2.6539	0.00795671	0.080307
ZBTB7A	ENSG00000178951	86.7871	0.745774	0.281052	2.65351	0.00796592	0.0803366
CNPY3	ENSG00000137161	166.642	0.543673	0.204953	2.65268	0.00798565	0.0804677
PTPRE	ENSG00000132334	1.91113	-4.06181	1.53135	-2.65243	0.00799148	0.0804677
LTBR	ENSG00000111321	148.241	0.651564	0.245854	2.65021	0.00804422	0.0809351
NDUFA9	ENSG00000139180	404.534	-0.71928	0.271458	-2.6497	0.00805643	0.0809943
KCNIP3	ENSG00000115041	19.0363	1.26786	0.478748	2.64828	0.0080903	0.081271
CEP78	ENSG00000148019	72.9116	0.688588	0.260041	2.648	0.00809693	0.0812739
PQLC1	ENSG00000122490	82.5781	0.746878	0.282161	2.647	0.00812105	0.0814521
LRRC45	ENSG00000169683	46.7312	0.926224	0.349952	2.64671	0.00812778	0.0814559
MRPL3	ENSG00000114686	386.019	-0.571341	0.215923	-2.64604	0.00814402	0.0814829
CCNB1	ENSG00000134057	118.263	-1.02843	0.388701	-2.64581	0.00814956	0.0814829
C21orf67	ENSG00000183250	3.89188	-2.54024	0.959936	-2.64626	0.0081388	0.0814829
NUF2	ENSG00000143228	32.307	-1.03708	0.392076	-2.64511	0.00816648	0.0815884
UTP20	ENSG00000120800	65.9038	0.755403	0.285632	2.64467	0.00817709	0.0816307
ZNF212	ENSG00000170260	15.4037	1.36381	0.515792	2.6441	0.00819075	0.0817034
SPCS1	ENSG00000114902	635.937	-0.855756	0.323726	-2.64346	0.00820644	0.0817326
ALKBH5	ENSG00000091542	112.597	0.635363	0.24033	2.64371	0.00820024	0.0817326
SNX2	ENSG00000205302	96.3606	-0.947384	0.358496	-2.64266	0.00822575	0.0817977
PDLIM4	ENSG00000131435	302.134	-0.702075	0.265655	-2.64281	0.00822224	0.0817977
RP5-935K16.1	ENSG00000270081	26.7012	1.18877	0.449942	2.64206	0.00824035	0.0818793
EMILIN1	ENSG00000138080	4.11824	-2.88137	1.09082	-2.64148	0.00825455	0.0819022
TRAPPC4	ENSG00000196655	516.268	-0.801823	0.303555	-2.64144	0.00825544	0.0819022
LPAR1	ENSG00000198121	86.2694	1.10538	0.418555	2.64095	0.00826741	0.0819288
ADK	ENSG00000156110	282.76	-0.707378	0.267865	-2.64081	0.00827092	0.0819288
UBQLN1	ENSG00000135018	120.677	0.598378	0.226616	2.64049	0.00827854	0.081941
KLHL23	ENSG00000213160	104.354	0.61899	0.234522	2.63937	0.00830614	0.0821506
PSMG4	ENSG00000180822	281.744	0.488446	0.185128	2.63843	0.0083292	0.082186
DUSP4	ENSG00000120875	113.109	1.05311	0.399128	2.63852	0.00832698	0.082186
CIZ1	ENSG00000148337	138.073	0.705574	0.26743	2.63835	0.00833112	0.082186
PICK1	ENSG00000100151	24.4932	1.07992	0.409343	2.63817	0.00833539	0.082186
AC026740.1	ENSG00000268885	3.63893	3.79213	1.43776	2.63752	0.00835143	0.0822177
RNF10	ENSG00000022840	96.2536	0.657542	0.249301	2.63755	0.00835082	0.0822177
MEX3A	ENSG00000254726	10.0413	-1.67388	0.634759	-2.63703	0.00836363	0.0822745
COL7A1	ENSG00000114270	54.703	1.05582	0.400628	2.63542	0.00840338	0.0825205
ISCA1	ENSG00000135070	155.677	0.555656	0.210838	2.63546	0.00840231	0.0825205
RAB40B	ENSG00000141542	69.2486	-0.672198	0.255081	-2.63523	0.00840797	0.0825205
AC002066.1	ENSG00000237813	2.18239	4.08928	1.55195	2.63493	0.00841553	0.0825314
ABL1	ENSG00000097007	82.6971	0.864661	0.328219	2.63441	0.00842844	0.0825596
TSEN34	ENSG00000170892	321.657	-0.548359	0.208162	-2.63429	0.00843129	0.0825596
TP53I3	ENSG00000115129	88.6386	-0.684275	0.259824	-2.63361	0.00844817	0.0826617
BTF3	ENSG00000145741	2412.42	-0.613424	0.232983	-2.63292	0.00846553	0.0826692
ZNF165	ENSG00000197279	4.2831	-2.4522	0.931404	-2.6328	0.0084683	0.0826692
CWC15	ENSG00000150316	283.159	-0.526883	0.200114	-2.63292	0.00846552	0.0826692
POLR2G	ENSG00000168002	380.28	-0.783351	0.297717	-2.6312	0.00850852	0.0829986
STK38L	ENSG00000211455	29.3762	-1.05849	0.402328	-2.63091	0.00851569	0.0830053
BLZF1	ENSG00000117475	36.5222	-0.840741	0.319607	-2.63054	0.00852482	0.0830311
NSMF	ENSG00000165802	83.945	0.714695	0.271795	2.62953	0.00855022	0.0832152
LIMS2	ENSG00000072163	2.91345	-3.28988	1.25129	-2.62918	0.00855899	0.0832373
PPP1R16A	ENSG00000160972	78.4311	0.82841	0.315286	2.62749	0.00860173	0.0834994
QSOX2	ENSG00000165661	58.6497	0.792364	0.301568	2.62748	0.00860188	0.0834994
RAB22A	ENSG00000124209	164.502	-0.553111	0.210521	-2.62734	0.00860549	0.0834994
GALNT11	ENSG00000178234	33.2087	0.926966	0.352917	2.62658	0.00862465	0.0835597
VPS37A	ENSG00000155975	58.5024	-0.743612	0.283138	-2.62632	0.00863128	0.0835597
DCPS	ENSG00000110063	55.8743	-0.825395	0.314265	-2.62643	0.00862868	0.0835597
SMARCB1	ENSG00000099956	246.796	0.518224	0.197352	2.62589	0.00864218	0.083602
CCT4	ENSG00000115484	558.692	-0.757318	0.288469	-2.6253	0.00865735	0.0836187
LAPTM4B	ENSG00000104341	363.531	-0.471378	0.179566	-2.6251	0.00866239	0.0836187
CLEC16A	ENSG00000038532	13.446	1.44205	0.54934	2.62506	0.00866349	0.0836187
UNC119	ENSG00000109103	40.0661	-0.798987	0.304408	-2.62473	0.00867182	0.083636
HMX2	ENSG00000188816	15.637	-1.28469	0.48983	-2.62273	0.00872274	0.0840638
FGFR1	ENSG00000077782	77.7094	0.700138	0.267022	2.62203	0.00874084	0.0841749
RFTN1	ENSG00000131378	36.4895	-0.966928	0.368975	-2.62058	0.00877813	0.084296
GOLGA3	ENSG00000090615	123.957	0.666507	0.254324	2.6207	0.00877499	0.084296
CCNDBP1	ENSG00000166946	67.1729	-0.919553	0.350803	-2.62128	0.00876005	0.084296
PTBP1	ENSG00000011304	322.47	0.621438	0.237143	2.62051	0.00877974	0.084296
PSMC1	ENSG00000100764	314.857	-0.590121	0.225256	-2.61978	0.00879856	0.0844134
PHLDB2	ENSG00000144824	72.5616	-0.829992	0.31687	-2.61934	0.00880991	0.0844389
PITRM1	ENSG00000107959	100.264	0.696675	0.265991	2.61917	0.00881439	0.0844389
HK1	ENSG00000156515	131.399	0.617904	0.236056	2.61761	0.00885471	0.0846352
RAB30	ENSG00000137502	19.9491	-1.21293	0.463309	-2.61796	0.00884561	0.0846352
HRK	ENSG00000135116	3.6421	-3.16212	1.20792	-2.61782	0.00884945	0.0846352
LMCD1	ENSG00000071282	35.6919	-0.923651	0.35321	-2.61502	0.0089222	0.0851333
TOPORS-AS1	ENSG00000235453	52.6012	0.830753	0.317694	2.61495	0.00892415	0.0851333
APLP1	ENSG00000105290	7.61298	-1.72441	0.659469	-2.61485	0.00892677	0.0851333
SUB1	ENSG00000113387	917.327	-0.615726	0.235499	-2.61456	0.00893422	0.085141
PRSS23	ENSG00000150687	1503.09	-0.87434	0.334601	-2.61308	0.00897301	0.085447
BANF1	ENSG00000175334	1036.62	-0.572583	0.219254	-2.6115	0.00901455	0.0857789
NACC1	ENSG00000160877	105.97	0.805903	0.308646	2.61109	0.0090253	0.0858174
EXOSC5	ENSG00000077348	183.139	-0.588971	0.225588	-2.61083	0.0090324	0.0858212
ZWINT	ENSG00000122952	491.732	-0.604691	0.231665	-2.61019	0.00904918	0.0859169
TLE4	ENSG00000106829	117.126	-0.614811	0.235619	-2.60935	0.00907151	0.0860014
OSBPL5	ENSG00000021762	1.47254	-4.48938	1.72036	-2.60957	0.00906571	0.0860014
PHACTR4	ENSG00000204138	65.0449	0.725046	0.278	2.60808	0.00910525	0.0861715
GRINA	ENSG00000178719	187.339	0.56632	0.217155	2.60791	0.00910964	0.0861715
NUDT21	ENSG00000167005	259.589	-0.588349	0.225588	-2.60807	0.0091054	0.0861715
ACOT7	ENSG00000097021	199.701	-0.590135	0.226318	-2.60755	0.00911917	0.086198
SLBP	ENSG00000163950	669.02	-0.54418	0.208882	-2.6052	0.00918202	0.0864432
EIF4E	ENSG00000151247	168.332	-0.688636	0.264282	-2.60568	0.00916915	0.0864432
USP5	ENSG00000111667	70.1105	0.747221	0.286815	2.60524	0.00918107	0.0864432
CD68	ENSG00000129226	43.6822	0.834323	0.320269	2.60507	0.00918561	0.0864432
LSM4	ENSG00000130520	2577.98	0.487736	0.187148	2.60616	0.00915645	0.0864432
CADM4	ENSG00000105767	2.608	-3.75627	1.44151	-2.60578	0.00916641	0.0864432
EXO5	ENSG00000164002	19.6543	-1.10443	0.424153	-2.60385	0.00921822	0.0866865
CCNG2	ENSG00000138764	4.00862	-2.6666	1.02423	-2.60352	0.00922721	0.0867074
SEMA6B	ENSG00000167680	9.75461	2.21324	0.850291	2.60293	0.00924322	0.0867941
CKS1B_ENSG00000173207	ENSG00000173207	742.701	-0.501782	0.192807	-2.60251	0.00925431	0.0868346
RNASEH2C	ENSG00000172922	490.664	-0.435367	0.167429	-2.60031	0.00931393	0.08733
ACAA2	ENSG00000167315	94.816	-0.623359	0.23981	-2.59939	0.00933898	0.0875009
NDNL2	ENSG00000185115	27.3897	-1.39215	0.535743	-2.59855	0.00936191	0.0876515
FANCC	ENSG00000158169	30.8692	1.03975	0.400363	2.59702	0.00940351	0.0879126
SLC38A10	ENSG00000157637	100.574	0.653057	0.251454	2.59713	0.00940075	0.0879126
ATN1	ENSG00000111676	87.0701	0.748898	0.288524	2.59562	0.00944211	0.0881519
CENPB	ENSG00000125817	228.419	0.605101	0.233127	2.59559	0.00944288	0.0881519
SNX7	ENSG00000162627	143.891	-0.654205	0.252202	-2.59397	0.00948746	0.0883397
SPEF2	ENSG00000152582	5.15891	-2.31185	0.891165	-2.59419	0.00948131	0.0883397
FAM120B	ENSG00000112584	24.3621	1.08516	0.418359	2.59386	0.00949059	0.0883397
CLU	ENSG00000120885	124.484	0.935642	0.360629	2.59447	0.0094737	0.0883397
TNFRSF10B	ENSG00000120889	89.2096	0.819891	0.31617	2.5932	0.00950878	0.0884448
SLAIN1	ENSG00000139737	10.6655	2.2829	0.880429	2.59294	0.00951604	0.088448
C21orf33	ENSG00000160221	91.3415	-0.602072	0.232318	-2.59158	0.00955355	0.0887323
NRG2	ENSG00000158458	10.254	1.72548	0.666106	2.5904	0.00958654	0.0889742
SYNC	ENSG00000162520	35.4711	-0.855947	0.330483	-2.58999	0.00959801	0.0890161
RRAS2	ENSG00000133818	179.227	-0.953757	0.368364	-2.58917	0.00962082	0.0891298
ACAT1	ENSG00000075239	167.251	-0.830734	0.320865	-2.58905	0.00962418	0.0891298
AKR1B1	ENSG00000085662	673.608	0.659543	0.254788	2.58859	0.00963691	0.0891458
MVD	ENSG00000167508	133.395	0.632966	0.244531	2.58849	0.00963982	0.0891458
ENG	ENSG00000106991	77.3884	1.07475	0.415458	2.58691	0.00968413	0.0894882
PTGES3L	ENSG00000267060	7.89073	-1.81988	0.703562	-2.58667	0.00969083	0.0894882
FHL3	ENSG00000183386	93.6277	-0.646945	0.250314	-2.58453	0.00975122	0.0898515
DEGS1	ENSG00000143753	159.443	-0.609236	0.235688	-2.58492	0.0097401	0.0898515
CDK14	ENSG00000058091	21.7906	1.1558	0.447159	2.58476	0.00974459	0.0898515
CD9	ENSG00000010278	125.71	-3.22419	1.24782	-2.58385	0.00977053	0.0899648
AHRR	ENSG00000063438	49.9044	0.793383	0.307398	2.58096	0.00985259	0.0906389
PDP1	ENSG00000164951	43.6565	0.876893	0.339779	2.58077	0.00985791	0.0906389
YWHAE	ENSG00000108953	916.36	-0.446627	0.17313	-2.57972	0.00988797	0.0908502
HMGCS1	ENSG00000112972	76.4723	0.684658	0.265453	2.57921	0.00990267	0.09092
HUS1	ENSG00000136273	40.9756	-0.807385	0.313134	-2.5784	0.00992598	0.0909384
ZDHHC21	ENSG00000175893	25.7746	1.01913	0.395218	2.57867	0.00991829	0.0909384
UNC5B	ENSG00000107731	1.49911	-4.47982	1.73737	-2.57851	0.0099228	0.0909384
EIF3M	ENSG00000149100	387.935	-0.85371	0.331331	-2.57661	0.0099775	0.0913451
SRSF3	ENSG00000112081	1163.73	-0.586944	0.227828	-2.57626	0.00998757	0.091372
RAB9B	ENSG00000123570	5.91686	-1.89545	0.735918	-2.57563	0.0100057	0.0914042
COMMD9	ENSG00000110442	190.86	-0.716259	0.278116	-2.5754	0.0100125	0.0914042
VAPA	ENSG00000101558	602.633	-0.474221	0.184129	-2.57549	0.01001	0.0914042
CCT2	ENSG00000166226	589.867	-0.607792	0.236027	-2.57509	0.0100214	0.0914204
ACD	ENSG00000102977	199.96	-0.501497	0.194882	-2.57334	0.0100721	0.0918176
SAR1A	ENSG00000079332	250.064	-0.482939	0.187717	-2.5727	0.0100909	0.0918682
WDR24	ENSG00000127580	18.346	1.20618	0.468846	2.57266	0.010092	0.0918682
ANPEP	ENSG00000166825	17.6782	1.53005	0.594881	2.57203	0.0101104	0.0919702
UTP11L	ENSG00000183520	259.545	-0.621092	0.241509	-2.57171	0.0101197	0.0919896
CTBP1	ENSG00000159692	227.61	0.627967	0.244386	2.56956	0.0101826	0.0923731
C4orf46	ENSG00000205208	75.2038	-0.677497	0.26366	-2.56958	0.0101821	0.0923731
EXOSC1	ENSG00000171311	319.703	-0.611001	0.237787	-2.56953	0.0101835	0.0923731
RND2	ENSG00000108830	4.95823	-2.22298	0.865462	-2.56854	0.0102127	0.0925716
INTS3	ENSG00000143624	24.0395	1.07285	0.417862	2.56748	0.010244	0.0926587
RBM42	ENSG00000126254	168.7	-0.586743	0.228517	-2.56762	0.0102401	0.0926587
TAB1	ENSG00000100324	28.6353	1.06336	0.414117	2.56777	0.0102355	0.0926587
FTL	ENSG00000087086	23219	0.481991	0.187801	2.5665	0.0102729	0.0928552
RP4-816N1.6	ENSG00000258325	16.4581	1.27768	0.498069	2.56527	0.0103096	0.0931205
UQCRC1	ENSG00000010256	479.225	-0.530468	0.206985	-2.56283	0.0103822	0.0934009
GRSF1	ENSG00000132463	123	-0.621836	0.242665	-2.56253	0.0103911	0.0934009
SETD9	ENSG00000155542	73.4193	-0.715421	0.279109	-2.56323	0.0103703	0.0934009
RP11-390P2.4	ENSG00000225177	17.6792	1.46062	0.56977	2.56352	0.0103618	0.0934009
NPTX2	ENSG00000106236	11.8044	-1.49052	0.581354	-2.56388	0.010351	0.0934009
DOCK11	ENSG00000147251	10.4924	1.6525	0.644936	2.56227	0.0103989	0.0934009
RP11-874J12.4	ENSG00000266401	4.40709	3.16202	1.23404	2.56234	0.0103969	0.0934009
MORC2	ENSG00000133422	37.5734	0.916815	0.35766	2.56337	0.0103662	0.0934009
EXD3	ENSG00000187609	27.2955	1.00747	0.39325	2.5619	0.0104103	0.093437
CD151	ENSG00000177697	715.259	-0.556584	0.217294	-2.56143	0.0104243	0.0934977
NUDC	ENSG00000090273	998.465	-0.517052	0.201974	-2.55999	0.0104675	0.0937536
C1GALT1	ENSG00000106392	61.6742	-0.819502	0.320114	-2.56003	0.0104662	0.0937536
ANXA11	ENSG00000122359	263.225	0.530943	0.207493	2.55885	0.0105019	0.0939958
ACSS1	ENSG00000154930	13.0896	1.49281	0.583544	2.55817	0.0105225	0.0941143
ANK1	ENSG00000029534	57.3392	0.839406	0.328578	2.55466	0.010629	0.0948686
C1R	ENSG00000159403	11.3645	-1.39788	0.547186	-2.55467	0.0106288	0.0948686
ZFP36	ENSG00000128016	12.8521	-1.27134	0.497579	-2.55506	0.0106171	0.0948686
RP11-462L8.1	ENSG00000229656	7.77022	1.96919	0.770924	2.55432	0.0106395	0.0948959
NPPC	ENSG00000163273	1.503	-4.48347	1.75568	-2.55369	0.0106587	0.095001
REEP5	ENSG00000129625	398.849	-0.722131	0.282841	-2.55314	0.0106758	0.0950209
ZNF354A	ENSG00000169131	18.6817	-1.10997	0.434706	-2.55337	0.0106686	0.0950209
CASP6	ENSG00000138794	43.0542	-0.92365	0.3619	-2.55223	0.0107037	0.0952037
MOV10	ENSG00000155363	61.5969	0.728278	0.285431	2.55151	0.0107258	0.0952674
LYPLA1	ENSG00000120992	213.903	-0.508756	0.199383	-2.55165	0.0107215	0.0952674
ZDHHC18	ENSG00000204160	25.3396	1.01942	0.399607	2.55104	0.0107401	0.0952708
STARD4	ENSG00000164211	42.3624	-0.794315	0.311401	-2.55077	0.0107484	0.0952708
FOSL1	ENSG00000175592	391.977	0.708072	0.277591	2.55077	0.0107485	0.0952708
VPS13A	ENSG00000197969	57.3528	0.843246	0.330639	2.55035	0.0107614	0.0953195
FBXO6	ENSG00000116663	1.49716	-4.47904	1.75665	-2.54976	0.0107797	0.0953501
TMEM206	ENSG00000065600	14.7083	-1.24953	0.490027	-2.54993	0.0107744	0.0953501
ADD1	ENSG00000087274	121.923	0.569993	0.223581	2.54938	0.0107916	0.0953891
FHL1	ENSG00000022267	156.058	-1.07966	0.423607	-2.54873	0.0108116	0.0954999
RGS19	ENSG00000171700	53.0035	-0.864658	0.339285	-2.54847	0.0108197	0.0955056
STOX1	ENSG00000165730	7.00085	-1.73337	0.680422	-2.54749	0.0108502	0.0957091
RBM4B	ENSG00000173914	52.8996	-0.822971	0.323229	-2.54609	0.0108937	0.0960263
FADS3	ENSG00000221968	94.1404	-0.865343	0.34028	-2.54303	0.0109895	0.0968048
ZNF768	ENSG00000169957	51.8471	0.939753	0.369593	2.54267	0.011001	0.0968389
PCGF5	ENSG00000180628	246.16	-0.514532	0.202415	-2.54196	0.0110232	0.0969636
KITLG	ENSG00000049130	27.6595	1.05068	0.413372	2.54174	0.0110303	0.0969636
EFNA4	ENSG00000243364	28.0789	-1.00801	0.396764	-2.54059	0.0110665	0.097053
SRP9	ENSG00000143742	850.618	-0.581745	0.229051	-2.5398	0.0110914	0.097053
CRIPT	ENSG00000119878	147.086	-0.72929	0.287131	-2.53993	0.0110876	0.097053
ZIC1	ENSG00000152977	47.5403	0.924303	0.36391	2.53992	0.0110877	0.097053
PPP1R11	ENSG00000204619	208.235	-0.4559	0.17949	-2.53998	0.0110859	0.097053
INTS1	ENSG00000164880	77.9887	0.810731	0.319236	2.5396	0.0110979	0.097053
FKTN	ENSG00000106692	25.5196	1.28442	0.505549	2.54064	0.0110649	0.097053
SERPINH1	ENSG00000149257	267.847	-0.632008	0.248871	-2.5395	0.0111011	0.097053
PRKCQ-AS1	ENSG00000237943	1.79293	-3.94289	1.5529	-2.53906	0.0111151	0.0971097
HIATL1	ENSG00000148110	46.0272	0.879858	0.34681	2.537	0.0111806	0.0976146
RP1-120G22.11	ENSG00000226944	2.03609	3.99324	1.57506	2.5353	0.0112352	0.0977581
SFRP1	ENSG00000104332	155.042	0.864339	0.340794	2.53625	0.0112047	0.0977581
LA16c-380H5.5	ENSG00000272079	18.1626	1.26865	0.500307	2.53574	0.0112209	0.0977581
IL4R	ENSG00000077238	42.0053	0.964427	0.380368	2.53551	0.0112283	0.0977581
SGTA	ENSG00000104969	160.263	0.557577	0.219897	2.53563	0.0112246	0.0977581
RNF121	ENSG00000137522	75.9497	-0.636428	0.251063	-2.53494	0.0112467	0.0977923
SRCRB4D	ENSG00000146700	4.48297	-2.30035	0.907576	-2.53461	0.0112573	0.0978178
C9orf69	ENSG00000238227	120.365	0.641662	0.253221	2.534	0.011277	0.0979228
PSMB2	ENSG00000126067	909.91	-0.563608	0.222456	-2.53357	0.0112907	0.0979751
B3GNT2	ENSG00000170340	20.3218	-1.06001	0.418509	-2.53282	0.011315	0.0981192
CTGF	ENSG00000118523	1446.47	-0.839136	0.331337	-2.53257	0.011323	0.0981221
COQ4	ENSG00000167113	353.927	0.46917	0.185378	2.53088	0.0113777	0.0985297
DOT1L	ENSG00000104885	71.2414	1.0262	0.405776	2.52897	0.0114399	0.0990013
GPN3	ENSG00000111231	184.676	-0.746591	0.295318	-2.52809	0.0114686	0.0991827
MCAT	ENSG00000100294	133.597	0.588512	0.232831	2.52763	0.0114834	0.0992439
PCCA	ENSG00000175198	14.1882	1.33637	0.528757	2.52738	0.0114916	0.0992476
KHSRP	ENSG00000088247	211.325	0.645699	0.255635	2.52587	0.0115413	0.0996101
AIP	ENSG00000110711	160.272	-0.650444	0.257609	-2.52493	0.0115721	0.0998084
SYNGR3	ENSG00000127561	19.3367	-1.42987	0.566571	-2.52373	0.0116116	0.100081
FAM134A	ENSG00000144567	63.7031	0.820752	0.325334	2.5228	0.0116426	0.100253
FLII	ENSG00000177731	100.356	0.602213	0.238744	2.52242	0.0116549	0.100253
BCL2L13	ENSG00000099968	139.739	0.575335	0.228084	2.52248	0.0116532	0.100253
MAST2	ENSG00000086015	48.6036	0.861518	0.341711	2.52119	0.011696	0.100538
POT1-AS1	ENSG00000224897	3.23056	3.60288	1.42966	2.5201	0.0117323	0.100783
SCAMP1	ENSG00000085365	32.6663	-0.845693	0.33607	-2.51642	0.0118555	0.10167
CTD-2325M2.1	ENSG00000267939	7.21994	2.14574	0.852736	2.5163	0.0118594	0.10167
CDC42EP1	ENSG00000128283	287.776	0.652337	0.259198	2.51675	0.0118444	0.10167
MDH2	ENSG00000146701	378.862	-0.549833	0.218618	-2.51504	0.011902	0.101899
MEPCE	ENSG00000146834	88.7284	0.775649	0.308381	2.51523	0.0118955	0.101899
SARDH	ENSG00000123453	28.7278	1.07669	0.428196	2.51447	0.011921	0.101994
PLLP	ENSG00000102934	3.20862	-2.91114	1.15791	-2.51413	0.0119327	0.102026
RPS6KA2	ENSG00000071242	65.246	0.769867	0.306334	2.51317	0.0119653	0.102236
ZNF362	ENSG00000160094	8.26938	-1.8427	0.733312	-2.51285	0.0119761	0.10226
C12orf5	ENSG00000078237	73.205	-0.751558	0.299189	-2.51199	0.0120054	0.102373
AP3S2	ENSG00000157823	12.0635	1.46659	0.583809	2.51211	0.0120013	0.102373
MORF4L2	ENSG00000123562	1184.89	-0.48359	0.192593	-2.51094	0.0120411	0.102547
PABPN1	ENSG00000100836	195.331	0.647578	0.257926	2.51071	0.0120488	0.102547
CTA-29F11.1	ENSG00000260708	57.4471	0.76652	0.305303	2.51068	0.0120497	0.102547
THOP1	ENSG00000172009	170.695	0.540411	0.215435	2.50847	0.0121257	0.103125
ATXN2L	ENSG00000168488	173.713	0.73384	0.292716	2.507	0.0121759	0.103483
ALG5	ENSG00000120697	73.4525	-0.999348	0.398665	-2.50674	0.0121852	0.103493
RSRC1	ENSG00000174891	186.642	-0.556743	0.222145	-2.50621	0.0122032	0.103509
CYHR1	ENSG00000187954	123.529	0.696751	0.277984	2.50644	0.0121954	0.103509
RP11-195F19.5	ENSG00000187186	38.7844	0.884041	0.352879	2.50522	0.0122374	0.103662
TOB2	ENSG00000183864	48.1108	0.87347	0.348628	2.50545	0.0122295	0.103662
MTX1	ENSG00000173171	255.684	-0.61161	0.244192	-2.50463	0.0122581	0.103729
LAT	ENSG00000213658	6.82892	2.09739	0.837519	2.50429	0.0122697	0.103729
CUEDC1	ENSG00000180891	59.8361	0.779032	0.311061	2.50443	0.0122648	0.103729
MED24	ENSG00000008838	22.1602	1.16782	0.466427	2.50376	0.0122881	0.103816
TPM3	ENSG00000143549	630.523	-0.487604	0.194918	-2.50158	0.0123639	0.10432
NPRL3	ENSG00000103148	95.979	0.60024	0.239924	2.50179	0.0123567	0.10432
TMEM248	ENSG00000106609	105.747	-0.551423	0.220539	-2.50034	0.0124074	0.104549
TRAF1	ENSG00000056558	63.4958	1.22991	0.49187	2.50048	0.0124025	0.104549
MTCH2	ENSG00000109919	343.393	-0.627835	0.251127	-2.50007	0.0124168	0.104559
B4GALT2	ENSG00000117411	139.946	0.541374	0.216645	2.4989	0.0124578	0.10457
LAMB3	ENSG00000196878	41.7976	1.40063	0.56051	2.49884	0.0124599	0.10457
MORN2	ENSG00000188010	117.276	-0.799272	0.319818	-2.49915	0.0124492	0.10457
ITGA2	ENSG00000164171	65.8521	0.853392	0.341543	2.49864	0.012467	0.10457
CADPS2	ENSG00000081803	22.2668	1.08643	0.434781	2.49879	0.0124619	0.10457
RBPMS2	ENSG00000166831	12.4372	-1.41975	0.568006	-2.49953	0.0124358	0.10457
CDC42EP4	ENSG00000179604	30.5299	1.00804	0.403536	2.49802	0.0124889	0.104684
MTA1	ENSG00000182979	75.4918	0.670051	0.268275	2.49763	0.0125028	0.104733
BRD2	ENSG00000204256	233.344	0.582851	0.233416	2.49705	0.0125232	0.104834
CCNL2	ENSG00000221978	131.345	0.528508	0.211744	2.49597	0.0125613	0.105076
PMF1	ENSG00000160783	254.668	-0.67578	0.270859	-2.49496	0.0125973	0.105076
ACOT9	ENSG00000123130	126.121	-0.648512	0.259907	-2.49517	0.0125895	0.105076
FBXW5	ENSG00000159069	271.346	0.679652	0.272436	2.49472	0.0126056	0.105076
TNFRSF12A	ENSG00000006327	2684.36	-0.489013	0.196027	-2.49461	0.0126094	0.105076
TBC1D10B	ENSG00000169221	70.0159	0.730504	0.292721	2.49556	0.0125758	0.105076
AP000350.4	ENSG00000218537	6.84167	2.06848	0.828935	2.49535	0.0125832	0.105076
TLN1	ENSG00000137076	465.148	0.640005	0.256729	2.49292	0.0126697	0.105441
ATG16L2	ENSG00000168010	14.1941	1.38329	0.554884	2.49294	0.012669	0.105441
RNF11	ENSG00000123091	114.223	-0.571908	0.229439	-2.49264	0.0126799	0.105457
THOC5	ENSG00000100296	68.7176	0.689997	0.276862	2.49221	0.0126952	0.105516
PYGL	ENSG00000100504	30.8724	0.931429	0.373921	2.49098	0.0127392	0.105813
RP3-508I15.21	ENSG00000272669	13.6305	1.34874	0.541543	2.49055	0.0127544	0.105871
BRWD1	ENSG00000185658	50.0658	-0.72818	0.29271	-2.48772	0.0128566	0.10665
BOLA3	ENSG00000163170	331.421	-0.441664	0.177567	-2.48731	0.0128713	0.106703
FRMD5	ENSG00000171877	13.169	1.40558	0.565169	2.48702	0.012882	0.106722
EIF3L	ENSG00000100129	519.787	0.607703	0.24441	2.48641	0.0129039	0.106834
TNK2	ENSG00000061938	18.0442	1.17732	0.473732	2.4852	0.0129478	0.107129
PRR14L	ENSG00000183530	63.1765	0.743196	0.299091	2.48485	0.0129606	0.107165
HIST1H2BJ	ENSG00000124635	46.6195	0.874739	0.352125	2.48417	0.0129853	0.107301
ABHD10	ENSG00000144827	35.6847	-0.816251	0.32862	-2.48387	0.0129962	0.107321
C1QTNF2	ENSG00000145861	4.94516	-2.21415	0.891971	-2.48232	0.0130532	0.107722
FDX1	ENSG00000137714	205.586	-0.504134	0.203139	-2.48172	0.0130749	0.107832
AKT3	ENSG00000117020	72.0604	-0.648012	0.261149	-2.48139	0.0130872	0.107844
NEDD1	ENSG00000139350	45.6181	-0.88732	0.357647	-2.481	0.0131016	0.107844
ARHGAP44	ENSG00000006740	7.7914	-1.74272	0.702404	-2.48108	0.0130984	0.107844
KIF15	ENSG00000163808	11.8233	-1.30354	0.52556	-2.48029	0.0131277	0.10799
ZBED6	ENSG00000257315	15.6669	-1.23121	0.496734	-2.47861	0.0131895	0.108428
PRDX1	ENSG00000117450	1767.03	-0.602327	0.243131	-2.47738	0.0132351	0.108669
ARPP21	ENSG00000172995	7.87872	1.96819	0.794617	2.47691	0.0132527	0.108669
C12orf29	ENSG00000133641	77.0402	-0.702302	0.283505	-2.47721	0.0132415	0.108669
ARG2	ENSG00000081181	19.2919	-1.19247	0.481435	-2.47691	0.0132525	0.108669
NOS1AP	ENSG00000198929	7.92838	1.85868	0.750902	2.47526	0.0133138	0.108997
GPR173	ENSG00000184194	5.69087	2.42196	0.978514	2.47514	0.0133182	0.108997
ELAC2	ENSG00000006744	80.6902	0.676055	0.273099	2.47549	0.0133053	0.108997
EBNA1BP2	ENSG00000117395	1241.29	-0.404305	0.163384	-2.47456	0.01334	0.109105
CD109	ENSG00000156535	28.3766	0.944909	0.381926	2.47406	0.0133586	0.109187
RP11-284F21.9	ENSG00000272068	2.38243	4.21008	1.70248	2.47292	0.0134015	0.109468
MCTS1	ENSG00000232119	214.588	-0.73636	0.297937	-2.47153	0.0134537	0.109685
TTC39C	ENSG00000168234	80.5448	0.705743	0.285546	2.47155	0.0134527	0.109685
EIF4ENIF1	ENSG00000184708	32.8389	0.892146	0.360945	2.4717	0.0134474	0.109685
TRIM16	ENSG00000221926	104.374	0.703193	0.284659	2.4703	0.0135	0.109992
KDELR2	ENSG00000136240	945.48	-0.652563	0.264284	-2.46917	0.0135426	0.110269
MAML3	ENSG00000196782	7.28213	1.88982	0.765619	2.46836	0.0135733	0.110379
KCNMA1	ENSG00000156113	977.171	-0.432398	0.175165	-2.46852	0.0135674	0.110379
SPG7	ENSG00000197912	103.452	0.622134	0.252348	2.46538	0.0136867	0.111231
TBXAS1	ENSG00000059377	38.4648	0.993268	0.402986	2.46477	0.0137102	0.11135
RP11-527D7.1	ENSG00000225554	5.35094	-2.7726	1.1271	-2.45995	0.0138957	0.112643
PRR16	ENSG00000184838	176.853	-0.673576	0.273783	-2.46026	0.0138838	0.112643
INTS9	ENSG00000104299	17.2302	1.2944	0.526159	2.4601	0.0138898	0.112643
EXOC3	ENSG00000180104	84.3675	0.652465	0.26532	2.45916	0.0139261	0.112743
TENC1	ENSG00000111077	49.0013	0.82498	0.335439	2.4594	0.0139168	0.112743
HSBP1	ENSG00000230989	1537.49	-0.555627	0.225961	-2.45895	0.0139344	0.112743
PHLPP1	ENSG00000081913	20.0198	1.07055	0.435708	2.45703	0.014009	0.113275
TBC1D12	ENSG00000108239	45.3957	-0.730697	0.29749	-2.45621	0.014041	0.113462
DBN1	ENSG00000113758	79.4013	-0.911615	0.37127	-2.4554	0.0140729	0.113648
ZBTB43	ENSG00000169155	40.2107	0.811234	0.33058	2.45397	0.0141288	0.114027
ACBD6	ENSG00000135847	151.413	-0.502753	0.204973	-2.45278	0.0141759	0.114103
TBC1D19	ENSG00000109680	23.1567	-1.24905	0.509246	-2.45275	0.014177	0.114103
LETM2	ENSG00000165046	29.7952	-0.847535	0.345476	-2.45324	0.0141576	0.114103
OAS3	ENSG00000111331	16.3248	-1.41204	0.575766	-2.45246	0.0141884	0.114103
TDRD3	ENSG00000083544	42.9543	0.789649	0.321924	2.4529	0.0141708	0.114103
SCFD1	ENSG00000092108	99.8437	-0.787683	0.321192	-2.45238	0.0141915	0.114103
CTSB	ENSG00000164733	468.416	0.473901	0.193262	2.45212	0.0142018	0.114113
MT-ND1	ENSG00000198888	3801.16	0.6142	0.250505	2.45184	0.0142127	0.114129
MARCH3	ENSG00000173926	41.6033	-0.801997	0.327154	-2.45144	0.0142287	0.114186
MFSD3	ENSG00000167700	82.795	0.708759	0.289166	2.45105	0.0142441	0.114238
PAQR4	ENSG00000162073	129.599	0.715721	0.292217	2.44928	0.0143141	0.114727
VPS39	ENSG00000166887	22.8908	1.04367	0.426452	2.44734	0.0143917	0.115277
PDGFRA	ENSG00000134853	1.80307	-3.931	1.60693	-2.44629	0.0144336	0.11534
PAXIP1	ENSG00000157212	29.6444	0.911164	0.372475	2.44624	0.0144355	0.11534
ST3GAL1	ENSG00000008513	15.571	1.37811	0.563316	2.44643	0.0144279	0.11534
SH3GL2	ENSG00000107295	1.88623	3.88806	1.58934	2.44633	0.0144319	0.11534
DCUN1D4	ENSG00000109184	38.876	-0.766191	0.313321	-2.44539	0.0144696	0.11554
DPM1	ENSG00000000419	233.789	-0.770935	0.315393	-2.44436	0.0145109	0.115798
POLR2F	ENSG00000100142	1139.75	0.415112	0.169857	2.44389	0.0145297	0.115876
NBPF10	ENSG00000163386	58.002	0.79469	0.325258	2.44326	0.0145552	0.115934
DCXR	ENSG00000169738	346.649	-0.561461	0.22978	-2.44348	0.0145466	0.115934
IKBIP	ENSG00000166130	251.295	-0.622442	0.254788	-2.44298	0.0145667	0.115954
NFU1	ENSG00000169599	149.16	-0.735841	0.301436	-2.44112	0.0146419	0.11648
CXCL2	ENSG00000081041	5.28341	2.76977	1.13484	2.44067	0.0146602	0.116482
NDUFAF2	ENSG00000164182	379.931	-0.521018	0.213463	-2.44079	0.0146553	0.116482
SLC1A3	ENSG00000079215	4.17447	4.02883	1.65095	2.44031	0.0146745	0.116522
JADE2	ENSG00000043143	34.8433	0.86938	0.356431	2.43913	0.0147228	0.116833
LEPROTL1	ENSG00000104660	93.3918	-0.593589	0.243409	-2.43865	0.0147423	0.116916
NUP37	ENSG00000075188	63.4753	-0.838602	0.343912	-2.43842	0.0147515	0.116917
ANKH	ENSG00000154122	54.5723	0.803705	0.329757	2.43726	0.0147989	0.117003
ITPR3	ENSG00000096433	48.2891	0.835237	0.342644	2.43763	0.0147841	0.117003
SH3BGRL	ENSG00000131171	212.839	-0.706296	0.289789	-2.43727	0.0147984	0.117003
CMTM3	ENSG00000140931	48.6663	-0.739611	0.30343	-2.4375	0.0147892	0.117003
TUBB	ENSG00000196230	1856.59	-0.427686	0.175559	-2.43613	0.0148451	0.117296
TTC38	ENSG00000075234	21.5308	1.04982	0.431129	2.43504	0.01489	0.117578
C15orf52	ENSG00000188549	43.3107	0.831786	0.34164	2.43469	0.0149047	0.117621
AHI1	ENSG00000135541	120.612	0.627036	0.257694	2.43325	0.0149638	0.117725
RMND1	ENSG00000155906	50.0119	0.719456	0.295704	2.43303	0.014973	0.117725
RP11-1002K11.1	ENSG00000272327	7.83862	2.32739	0.956297	2.43375	0.0149434	0.117725
STRAP	ENSG00000023734	843.622	-0.436531	0.179389	-2.43343	0.0149563	0.117725
HSP90B1	ENSG00000166598	743.565	-0.654801	0.269123	-2.4331	0.0149703	0.117725
TMEM160	ENSG00000130748	591.039	-0.453822	0.186519	-2.43312	0.0149695	0.117725
PHF13	ENSG00000116273	46.5849	0.774342	0.318371	2.4322	0.0150075	0.117924
WRB	ENSG00000182093	109.417	-0.735548	0.302567	-2.43102	0.0150562	0.118234
RP11-277L2.5	ENSG00000269614	1.95494	3.92791	1.61614	2.43042	0.0150813	0.118359
HADHB	ENSG00000138029	110.609	-0.8145	0.335179	-2.43004	0.0150971	0.11841
GIGYF1	ENSG00000146830	12.8617	1.44909	0.596416	2.42966	0.0151131	0.118463
BRIX1	ENSG00000113460	354.035	-0.601928	0.24789	-2.42821	0.0151737	0.118797
ST6GALNAC4	ENSG00000136840	38.294	0.894798	0.368504	2.42819	0.0151742	0.118797
NCDN	ENSG00000020129	11.9089	1.63893	0.675239	2.42718	0.0152167	0.118839
RASSF4	ENSG00000107551	27.5798	0.944499	0.389065	2.42761	0.0151986	0.118839
GEMIN4	ENSG00000179409	54.5538	0.753658	0.310495	2.42728	0.0152124	0.118839
STX8	ENSG00000170310	79.9551	-0.731565	0.301339	-2.42771	0.0151944	0.118839
PSMA5	ENSG00000143106	681.699	-0.623122	0.2568	-2.42649	0.0152457	0.118993
PTER	ENSG00000165983	4.58601	-2.14474	0.884267	-2.42545	0.0152895	0.119262
PRIM1	ENSG00000198056	100.597	-0.797956	0.329185	-2.42404	0.0153491	0.119654
TBC1D1	ENSG00000065882	86.6854	0.652814	0.269394	2.42327	0.0153816	0.119773
MYPN	ENSG00000138347	3.28463	3.64621	1.50482	2.42302	0.0153919	0.119773
TMEM38A	ENSG00000072954	7.17967	1.89785	0.78326	2.42301	0.0153924	0.119773
CAD	ENSG00000084774	72.8258	0.6925	0.285903	2.42215	0.0154288	0.119945
SUV39H1	ENSG00000101945	36.2438	0.867162	0.358028	2.42205	0.0154333	0.119945
NDUFA4	ENSG00000189043	1648.03	-0.783296	0.323467	-2.42156	0.0154539	0.11996
KCTD14	ENSG00000151364	3.44301	-2.95828	1.22157	-2.42171	0.0154476	0.11996
RILPL2	ENSG00000150977	72.5843	-0.610585	0.252344	-2.41965	0.0155353	0.120518
ENY2	ENSG00000120533	642.836	-0.560389	0.231623	-2.4194	0.0155461	0.12053
TRIM56	ENSG00000169871	58.1684	0.745898	0.308393	2.41866	0.0155778	0.120634
FOXL1	ENSG00000176678	36.0081	0.893195	0.369296	2.41864	0.0155785	0.120634
RP11-159D12.2	ENSG00000264112	4.11167	3.04998	1.26169	2.41738	0.0156327	0.120981
DGCR8	ENSG00000128191	63.8243	0.810368	0.335269	2.41707	0.0156462	0.121012
MRPS31	ENSG00000102738	43.5043	-1.09618	0.453626	-2.41648	0.0156714	0.121134
SUCLG2	ENSG00000172340	86.1152	-0.738033	0.305663	-2.41453	0.0157556	0.12149
NUP54	ENSG00000138750	54.6783	-0.673913	0.279094	-2.41465	0.0157505	0.12149
ZNF618	ENSG00000157657	26.9048	1.04868	0.434358	2.41431	0.0157648	0.12149
COMTD1	ENSG00000165644	113.53	-0.560436	0.232129	-2.41433	0.0157641	0.12149
AGAP2-AS1	ENSG00000255737	82.5553	-0.608943	0.252219	-2.41434	0.0157638	0.12149
SPEN	ENSG00000065526	78.9619	0.74056	0.306908	2.41297	0.0158232	0.121541
RAD54L	ENSG00000085999	38.375	0.833941	0.345688	2.41241	0.0158475	0.121541
RPL22L1	ENSG00000163584	787.3	-0.50994	0.211364	-2.41261	0.0158386	0.121541
PHF1	ENSG00000112511	43.3925	0.792711	0.328453	2.41347	0.0158014	0.121541
GEMIN2	ENSG00000092208	27.2989	-1.04111	0.431477	-2.41289	0.0158266	0.121541
IFI27L1	ENSG00000165948	69.6741	0.783277	0.32458	2.4132	0.0158132	0.121541
TASP1	ENSG00000089123	28.3223	-0.863597	0.357874	-2.41313	0.0158161	0.121541
RUVBL2	ENSG00000183207	245.335	-0.543281	0.22519	-2.41255	0.0158414	0.121541
BLOC1S4	ENSG00000186222	128.688	-0.525814	0.218018	-2.4118	0.0158741	0.121673
SDSL	ENSG00000139410	33.5084	1.02871	0.426576	2.41155	0.0158849	0.121683
TERF1	ENSG00000147601	95.7551	-0.652457	0.270584	-2.41129	0.0158964	0.121698
KIFC2	ENSG00000167702	29.0598	1.08849	0.451485	2.41091	0.0159126	0.121738
TBX2	ENSG00000121068	10.365	1.62372	0.673539	2.41073	0.0159206	0.121738
ARL2	ENSG00000213465	587.463	-0.61727	0.256166	-2.40964	0.0159681	0.122029
PER2	ENSG00000132326	3.36453	3.67488	1.52583	2.40845	0.0160205	0.122356
RFC4	ENSG00000163918	288.056	-0.600278	0.249419	-2.40671	0.016097	0.122511
ADAP1	ENSG00000105963	1.65442	-3.81153	1.58373	-2.40668	0.0160983	0.122511
CASP1	ENSG00000137752	63.8594	-0.938143	0.389745	-2.40707	0.016081	0.122511
THBD	ENSG00000178726	1.65819	-3.81025	1.58277	-2.40733	0.0160696	0.122511
DNM2	ENSG00000079805	97.6651	0.602491	0.250248	2.40757	0.016059	0.122511
RHBDD3	ENSG00000100263	74.8055	0.689432	0.286423	2.40704	0.0160825	0.122511
NSA2	ENSG00000164346	231.569	-0.707266	0.293919	-2.40633	0.0161135	0.122515
PRNP	ENSG00000171867	92.5752	-0.590704	0.245489	-2.40624	0.0161179	0.122515
ZFP82	ENSG00000181007	1.65247	-3.81024	1.58391	-2.40559	0.0161463	0.122659
ACTR3	ENSG00000115091	321.575	-0.651275	0.270763	-2.40533	0.0161578	0.122673
DONSON	ENSG00000159147	53.9081	-0.809816	0.336773	-2.40463	0.0161887	0.122834
LACTB2	ENSG00000147592	123.631	-0.779809	0.324514	-2.40301	0.0162608	0.123294
PKD1	ENSG00000008710	39.9463	0.945336	0.393425	2.40284	0.0162685	0.123294
CC2D1B	ENSG00000154222	41.1135	0.814068	0.338931	2.40187	0.0163115	0.123532
ZBTB7B	ENSG00000160685	21.3347	1.35328	0.563508	2.40152	0.016327	0.123532
SLC22A23	ENSG00000137266	5.75963	2.37468	0.988839	2.40148	0.0163288	0.123532
HIGD1A	ENSG00000181061	149.498	-0.82164	0.342315	-2.40025	0.016384	0.12373
PFKM	ENSG00000152556	68.7528	0.662527	0.275975	2.40068	0.0163648	0.12373
ZNF146	ENSG00000167635	54.2503	-0.689898	0.287421	-2.40031	0.0163814	0.12373
CDC42BPB	ENSG00000198752	45.5435	0.804837	0.335488	2.39901	0.0164397	0.123791
ABCC1	ENSG00000103222	73.2791	0.74085	0.308771	2.39935	0.0164243	0.123791
APCDD1L	ENSG00000198768	10.2577	-1.56182	0.650859	-2.39963	0.0164115	0.123791
ZNF726	ENSG00000213967	4.56743	2.5516	1.06331	2.39968	0.0164095	0.123791
SHKBP1	ENSG00000160410	133.756	-0.484423	0.201928	-2.39899	0.0164403	0.123791
UNKL	ENSG00000059145	62.5836	0.663196	0.276649	2.39725	0.0165187	0.124308
ARHGAP6	ENSG00000047648	11.8121	1.42804	0.59625	2.39504	0.0166185	0.124985
USP47	ENSG00000170242	77.6665	-0.604753	0.252558	-2.39452	0.0166423	0.125091
NXNL2	ENSG00000130045	7.02765	1.86238	0.778187	2.39323	0.0167005	0.125455
TCF19	ENSG00000137310	161.863	0.637906	0.266757	2.39134	0.0167872	0.125906
CCDC34	ENSG00000109881	270.321	-0.462951	0.193586	-2.39144	0.0167824	0.125906
GNS	ENSG00000135677	104.873	0.602582	0.251992	2.39127	0.0167901	0.125906
HOMER3	ENSG00000051128	185.871	0.777505	0.325237	2.39058	0.0168217	0.126069
NAV3	ENSG00000067798	15.5833	1.55909	0.652292	2.39016	0.0168408	0.126139
PLRG1	ENSG00000171566	72.5064	-0.848244	0.355085	-2.38884	0.0169014	0.126297
TYRO3	ENSG00000092445	32.4258	0.870246	0.364286	2.38891	0.0168985	0.126297
DDX52	ENSG00000141141	113.996	-0.794982	0.332701	-2.38948	0.0168723	0.126297
ADRM1	ENSG00000130706	775.64	-0.455059	0.19046	-2.38927	0.0168819	0.126297
UPF1	ENSG00000005007	60.9547	0.698002	0.292219	2.38862	0.0169117	0.1263
THRAP3	ENSG00000054118	293.663	-0.582986	0.24409	-2.3884	0.0169217	0.126302
SLC6A6	ENSG00000131389	31.2759	-0.888048	0.372048	-2.38692	0.0169904	0.126593
UBAC2	ENSG00000134882	95.5027	0.578177	0.242208	2.38711	0.0169814	0.126593
P2RX6	ENSG00000099957	17.2383	1.37364	0.575479	2.38695	0.0169887	0.126593
RP6-109B7.3	ENSG00000241990	121.453	0.919088	0.385239	2.38576	0.0170439	0.126918
COPS8	ENSG00000198612	232.189	-0.638551	0.267679	-2.38551	0.0170557	0.126931
TAOK2	ENSG00000149930	52.4745	0.681483	0.285714	2.38519	0.0170704	0.126965
FAM83D	ENSG00000101447	14.3308	-1.278	0.535853	-2.38498	0.01708	0.126965
RPS6	ENSG00000137154	13978.7	0.491132	0.206111	2.38285	0.0171793	0.127574
DHRS7	ENSG00000100612	51.647	-1.0238	0.429726	-2.38246	0.0171975	0.127574
MED6	ENSG00000133997	56.8164	-0.684468	0.287261	-2.38274	0.0171843	0.127574
YPEL2	ENSG00000175155	5.9169	-2.15187	0.90333	-2.38215	0.0172117	0.127574
SNRPB	ENSG00000125835	2610.36	-0.476587	0.200054	-2.38229	0.0172052	0.127574
MLLT4	ENSG00000130396	44.912	0.75934	0.318801	2.38186	0.0172254	0.127601
C1orf233	ENSG00000228594	42.789	-0.950101	0.399238	-2.37979	0.0173226	0.128174
APOA1	ENSG00000118137	2.26655	-3.52152	1.47974	-2.37982	0.0173211	0.128174
NR2F1	ENSG00000175745	29.698	-0.927235	0.389951	-2.37782	0.0174152	0.12871
TANGO2	ENSG00000183597	32.1498	0.891454	0.374897	2.37786	0.0174134	0.12871
IL31RA	ENSG00000164509	9.83571	1.81617	0.763936	2.37739	0.0174356	0.128787
ISYNA1	ENSG00000105655	21.2892	-1.15166	0.484484	-2.3771	0.0174495	0.128815
XKR9	ENSG00000221947	5.61186	-1.80257	0.758392	-2.37683	0.0174619	0.128832
GARS	ENSG00000106105	235.918	-0.659957	0.277814	-2.37554	0.0175234	0.129211
CSAD	ENSG00000139631	18.2248	1.16443	0.490384	2.37452	0.0175716	0.129492
TRAF7	ENSG00000131653	115.217	0.603582	0.254253	2.37394	0.0175993	0.129547
TOMM40	ENSG00000130204	399.908	-0.432135	0.182025	-2.37404	0.0175944	0.129547
PRADC1	ENSG00000135617	168.495	-0.486536	0.205065	-2.3726	0.0176635	0.129871
TP53RK	ENSG00000172315	115.145	-0.665282	0.280393	-2.37268	0.0176596	0.129871
ZNF639	ENSG00000121864	68.2324	-0.660185	0.278283	-2.37236	0.0176751	0.129881
EIF3I	ENSG00000084623	802.525	-0.54806	0.231089	-2.37164	0.0177094	0.129984
MTMR3	ENSG00000100330	28.7898	0.864215	0.364373	2.37179	0.0177024	0.129984
AP000569.9	ENSG00000273102	9.21307	1.93922	0.818087	2.37044	0.017767	0.130332
AC002467.7	ENSG00000241764	19.2055	1.10615	0.466726	2.37003	0.0177865	0.130401
TOX	ENSG00000198846	6.34487	2.02941	0.857415	2.36689	0.0179382	0.131437
GSKIP	ENSG00000100744	26.2273	-0.865473	0.365776	-2.36613	0.0179752	0.131633
POMGNT1	ENSG00000085998	76.0089	0.682652	0.288724	2.36437	0.0180607	0.131772
TMEM158	ENSG00000249992	219.827	1.49754	0.633203	2.36502	0.018029	0.131772
ZNF775	ENSG00000196456	12.6263	1.32556	0.560715	2.36405	0.0180763	0.131772
B4GALT1	ENSG00000086062	84.7925	0.657509	0.278139	2.36396	0.0180808	0.131772
PIBF1	ENSG00000083535	58.8171	0.909021	0.384587	2.36363	0.0180971	0.131772
POLR2C	ENSG00000102978	276.816	-0.533465	0.225688	-2.36373	0.0180921	0.131772
EXOC7	ENSG00000182473	118.96	0.532458	0.225126	2.36516	0.0180224	0.131772
PDE4A	ENSG00000065989	11.3503	-1.53879	0.650797	-2.36447	0.0180557	0.131772
CRLF1	ENSG00000006016	6.00741	-1.93894	0.819948	-2.36472	0.0180439	0.131772
ZNF331	ENSG00000130844	10.0919	-1.39787	0.591393	-2.36369	0.0180941	0.131772
ANKRD39	ENSG00000213337	189.325	0.517471	0.21901	2.36277	0.018139	0.131896
C10orf2	ENSG00000107815	40.7245	0.950826	0.402377	2.36302	0.0181265	0.131896
TRMT6	ENSG00000089195	131.365	-0.591113	0.250191	-2.36265	0.018145	0.131896
RP11-252A24.7	ENSG00000260539	49.3953	0.795329	0.336763	2.36169	0.018192	0.132163
SNRPE	ENSG00000182004	862.495	-0.477337	0.20227	-2.3599	0.01828	0.132205
APTX	ENSG00000137074	119.16	0.595397	0.252297	2.3599	0.0182796	0.132205
SHB	ENSG00000107338	83.4334	0.738168	0.312767	2.36012	0.0182691	0.132205
HTR7	ENSG00000148680	10.4693	1.45787	0.617681	2.36024	0.0182632	0.132205
ZNF629	ENSG00000102870	24.8694	0.982282	0.41603	2.36108	0.0182216	0.132205
TOM1L2	ENSG00000175662	33.2965	0.891608	0.377818	2.35989	0.0182803	0.132205
CNP	ENSG00000173786	100.644	0.632547	0.268024	2.36004	0.018273	0.132205
SF3A1	ENSG00000099995	124.642	0.636968	0.269802	2.36087	0.0182319	0.132205
PAPL	ENSG00000183760	7.46341	1.75956	0.745702	2.3596	0.0182946	0.132233
GBF1	ENSG00000107862	104.38	0.619849	0.262967	2.35713	0.0184168	0.133041
EXOSC8	ENSG00000120699	184.698	-0.776413	0.329445	-2.35673	0.0184367	0.13311
NPPA-AS1	ENSG00000242349	6.08393	2.09609	0.889873	2.35549	0.0184982	0.133261
KDM4A-AS1	ENSG00000236200	23.701	1.07496	0.456261	2.35601	0.0184724	0.133261
CFL2	ENSG00000165410	182.824	-0.632475	0.268552	-2.35513	0.0185161	0.133261
TNRC6A	ENSG00000090905	85.8809	0.593647	0.25202	2.35556	0.0184949	0.133261
ABR	ENSG00000159842	78.3105	0.635553	0.269868	2.35505	0.01852	0.133261
ZNF382	ENSG00000161298	5.2408	-2.09704	0.890304	-2.35542	0.018502	0.133261
GSPT1	ENSG00000103342	314.177	-0.612745	0.2603	-2.35399	0.0185731	0.133525
STX16	ENSG00000124222	95.7808	0.617306	0.262268	2.35373	0.0185863	0.133525
PSMA7	ENSG00000101182	4043.69	-0.567276	0.241015	-2.35369	0.0185879	0.133525
MGST2	ENSG00000085871	29.2594	-1.05252	0.447296	-2.35308	0.0186187	0.133596
RP9	ENSG00000164610	75.3893	-0.677666	0.287978	-2.35319	0.0186132	0.133596
CD58	ENSG00000116815	77.4423	-0.805704	0.34274	-2.35077	0.0187346	0.134052
NUCKS1	ENSG00000069275	795.216	-0.625605	0.266034	-2.35159	0.0186932	0.134052
TLR4	ENSG00000136869	43.4642	-0.777326	0.330623	-2.3511	0.0187181	0.134052
ZNF180	ENSG00000167384	15.983	-1.1132	0.473528	-2.35087	0.0187296	0.134052
TEF	ENSG00000167074	12.0579	1.35106	0.5747	2.3509	0.0187281	0.134052
TMEM259	ENSG00000182087	150.362	0.559149	0.237908	2.35027	0.0187598	0.134157
MPP7	ENSG00000150054	4.02961	-2.33704	0.994702	-2.34948	0.0187995	0.134366
IAH1	ENSG00000134330	171.261	-0.585217	0.249131	-2.34903	0.0188222	0.134393
RP11-288H12.4	ENSG00000270949	4.50604	2.52351	1.07429	2.34899	0.0188242	0.134393
UGP2	ENSG00000169764	132.217	-0.825678	0.351608	-2.34829	0.0188598	0.134572
RPAP3	ENSG00000005175	39.0904	-1.06821	0.455065	-2.34738	0.0189058	0.134825
PPP1CB	ENSG00000213639	99.342	-0.632138	0.269339	-2.347	0.0189253	0.13488
SSFA2	ENSG00000138434	138.477	0.667167	0.284286	2.34682	0.0189347	0.13488
PIK3CD	ENSG00000171608	30.7999	0.943167	0.402012	2.34611	0.0189703	0.134958
CAPZA2	ENSG00000198898	238.515	-0.545233	0.232374	-2.34636	0.0189577	0.134958
MLF2	ENSG00000089693	847.74	-0.410821	0.175117	-2.34598	0.0189772	0.134958
SP5	ENSG00000204335	1.86714	3.85661	1.64429	2.34546	0.0190034	0.135
ZMAT2	ENSG00000146007	243.262	-0.54196	0.231069	-2.34545	0.0190042	0.135
TCEAL8	ENSG00000180964	292.376	-0.846349	0.361093	-2.34386	0.0190855	0.135481
PNPLA3	ENSG00000100344	18.4711	1.09778	0.468396	2.34371	0.019093	0.135481
HCFC1	ENSG00000172534	115.211	0.707896	0.302173	2.34269	0.0191454	0.135627
USP3-AS1	ENSG00000259248	5.66178	2.11068	0.900955	2.34271	0.0191442	0.135627
CCDC40	ENSG00000141519	2.45663	-2.97413	1.26953	-2.3427	0.0191446	0.135627
RP11-354K1.1	ENSG00000227764	4.12938	2.97918	1.27214	2.34187	0.0191874	0.135825
RPA3-AS1	ENSG00000219545	47.748	-0.870945	0.371923	-2.34173	0.0191945	0.135825
ATP11A	ENSG00000068650	25.1231	0.933078	0.398547	2.3412	0.0192218	0.135904
BCL2L2	ENSG00000129473	21.3556	1.03276	0.441163	2.341	0.0192322	0.135904
EMC7	ENSG00000134153	311.842	-0.679553	0.290296	-2.3409	0.0192375	0.135904
CENPK	ENSG00000123219	205.025	-0.622133	0.265794	-2.34066	0.0192497	0.135908
FLRT2	ENSG00000185070	8.06001	1.6685	0.712889	2.34047	0.0192593	0.135908
PPAP2A	ENSG00000067113	25.7868	-0.903627	0.386155	-2.34006	0.0192804	0.135982
SAMD15	ENSG00000100583	5.01013	-1.92901	0.824491	-2.33964	0.0193024	0.136062
GPR124	ENSG00000020181	2.62614	-3.04341	1.30192	-2.33763	0.0194067	0.136497
CTSC	ENSG00000109861	570.487	-0.835341	0.357311	-2.33785	0.0193949	0.136497
SPATS2	ENSG00000123352	172.071	0.580159	0.248164	2.33781	0.0193973	0.136497
MBP	ENSG00000197971	5.30642	2.41644	1.03363	2.33782	0.0193964	0.136497
ZNF670	ENSG00000135747	6.63277	-1.75618	0.751637	-2.33647	0.0194666	0.136843
BCL7B	ENSG00000106635	160.078	-0.506686	0.216967	-2.33531	0.0195273	0.137188
LSR	ENSG00000105699	66.0784	0.822978	0.352435	2.33512	0.019537	0.137188
COASY	ENSG00000068120	136.573	0.562273	0.240815	2.33487	0.0195502	0.137205
CAAP1	ENSG00000120159	49.083	0.813134	0.348301	2.33457	0.0195658	0.137239
SRD5A3	ENSG00000128039	25.2563	-0.964893	0.413344	-2.33436	0.019577	0.137243
URB1	ENSG00000142207	33.9577	0.893708	0.382962	2.33367	0.0196129	0.137419
PPAPDC1B	ENSG00000147535	118.759	-0.604642	0.25919	-2.33282	0.0196578	0.137658
JAM2	ENSG00000154721	9.79673	1.77274	0.76011	2.33221	0.0196898	0.137807
CITED4	ENSG00000179862	205.379	0.655302	0.28108	2.33137	0.0197339	0.13804
MDC1	ENSG00000137337	40.8751	0.813293	0.348897	2.33104	0.0197512	0.138086
TTL	ENSG00000114999	105.709	0.587369	0.252013	2.33071	0.0197686	0.138132
CCHCR1	ENSG00000204536	69.6004	0.67134	0.288152	2.32981	0.0198163	0.13839
FHOD1	ENSG00000135723	131.945	0.640323	0.274869	2.32956	0.0198295	0.138407
AMPD2	ENSG00000116337	59.7869	0.786065	0.337463	2.32934	0.0198411	0.138412
KIAA2013	ENSG00000116685	86.523	0.616821	0.264858	2.32887	0.019866	0.138455
ERCC8	ENSG00000049167	25.5401	-0.883955	0.379573	-2.32881	0.0198689	0.138455
MGAT5	ENSG00000152127	32.0568	0.905236	0.388872	2.32785	0.01992	0.138736
RP1-28O10.1	ENSG00000227591	2.98943	3.50699	1.50726	2.32673	0.0199797	0.13885
LAT2	ENSG00000086730	8.08803	1.64265	0.705979	2.32676	0.0199778	0.13885
CUBN	ENSG00000107611	1.76277	3.79125	1.62927	2.32697	0.0199669	0.13885
NME1	ENSG00000239672	2095.44	-0.496658	0.213448	-2.32683	0.0199743	0.13885
FAM129A	ENSG00000135842	63.3263	0.836243	0.3596	2.32548	0.0200464	0.139238
ZNF330	ENSG00000109445	80.4762	-0.581724	0.250225	-2.3248	0.0200826	0.139414
SYMPK	ENSG00000125755	38.6269	0.864023	0.371751	2.3242	0.0201148	0.139561
STK24	ENSG00000102572	96.5328	0.645685	0.277861	2.32377	0.0201378	0.139646
TMEM106B	ENSG00000106460	60.7122	-0.767501	0.330445	-2.32263	0.020199	0.139994
KCTD1	ENSG00000134504	20.9505	1.23186	0.530568	2.32178	0.0202445	0.140234
DENND4C	ENSG00000137145	17.2431	1.10862	0.477648	2.321	0.0202867	0.140374
TCF3	ENSG00000071564	81.3541	0.633416	0.272902	2.32104	0.0202849	0.140374
TAMM41	ENSG00000144559	15.8377	-1.1308	0.487295	-2.32057	0.0203102	0.14046
LRPAP1	ENSG00000163956	235.87	-0.43674	0.188362	-2.31862	0.0204158	0.140899
DTNBP1	ENSG00000047579	123.88	-0.544605	0.234866	-2.31879	0.0204064	0.140899
RPL7L1	ENSG00000146223	398.984	0.451325	0.194655	2.31859	0.0204175	0.140899
GUSB	ENSG00000169919	44.6903	-0.766617	0.330629	-2.31866	0.0204134	0.140899
TMUB2	ENSG00000168591	46.5651	0.748721	0.323002	2.31801	0.0204488	0.141038
PRKAA2	ENSG00000162409	45.8186	0.967885	0.417685	2.31726	0.0204894	0.141243
ULBP2	ENSG00000131015	53.56	-0.897523	0.3875	-2.31619	0.0205478	0.141569
NOP9	ENSG00000196943	17.2624	1.12833	0.487267	2.31564	0.0205779	0.1417
MOCS2	ENSG00000164172	162.656	-0.591633	0.255786	-2.313	0.0207227	0.142416
LARP4B	ENSG00000107929	87.7295	0.596964	0.25804	2.31345	0.0206978	0.142416
RNF213	ENSG00000173821	140.935	0.498624	0.215581	2.31293	0.0207264	0.142416
CPT1B	ENSG00000205560	2.81622	3.43572	1.48543	2.31294	0.0207258	0.142416
TMCO3	ENSG00000150403	138.775	0.532866	0.230437	2.31241	0.0207549	0.142535
ACAP3	ENSG00000131584	63.144	0.665673	0.288026	2.31116	0.0208242	0.142801
APOM	ENSG00000204444	7.16605	1.93589	0.837626	2.31116	0.0208239	0.142801
CCDC43	ENSG00000180329	78.6777	-0.579035	0.250544	-2.31111	0.020827	0.142801
POU2F2	ENSG00000028277	35.3475	0.97706	0.423036	2.30964	0.0209083	0.143282
DGUOK	ENSG00000114956	489.092	-0.477329	0.206693	-2.30936	0.0209235	0.143293
PUS3	ENSG00000110060	34.8413	-0.887667	0.384404	-2.3092	0.0209323	0.143293
ARL6IP5	ENSG00000144746	317.574	-0.548814	0.237714	-2.30872	0.0209592	0.143324
UBAP2	ENSG00000137073	88.14	0.571637	0.247581	2.30889	0.0209495	0.143324
CAMK1	ENSG00000134072	80.1722	-0.641264	0.278079	-2.30605	0.0211081	0.144265
DUSP11	ENSG00000144048	73.3818	-0.861209	0.373497	-2.3058	0.021122	0.144283
ZDHHC3	ENSG00000163812	157	-0.490155	0.212632	-2.30518	0.0211563	0.144286
SMAD3	ENSG00000166949	177.664	0.525721	0.228026	2.30553	0.0211369	0.144286
USP36	ENSG00000055483	54.4629	0.683428	0.29645	2.30537	0.0211457	0.144286
RPLP0	ENSG00000089157	9922.85	0.346614	0.150393	2.30471	0.0211826	0.144389
NOC3L	ENSG00000173145	115.224	-0.576148	0.250041	-2.30421	0.0212107	0.144504
AL357673.1	ENSG00000248835	7.01541	1.82668	0.792961	2.30362	0.021244	0.144653
NOM1	ENSG00000146909	68.7577	0.724779	0.314683	2.3032	0.0212676	0.144737
RP11-10K16.1	ENSG00000245213	5.68479	2.11829	0.919816	2.30295	0.0212816	0.144755
TUSC3	ENSG00000104723	138.495	-0.516562	0.224331	-2.30268	0.0212966	0.144781
UMPS	ENSG00000114491	122	-0.654558	0.284284	-2.30247	0.0213085	0.144784
RHNO1	ENSG00000171792	123.997	-0.575744	0.250226	-2.3009	0.0213976	0.145313
STK16	ENSG00000115661	75.7829	0.636912	0.276919	2.29999	0.0214489	0.145569
INPP5E	ENSG00000148384	12.4965	1.34482	0.58475	2.29983	0.021458	0.145569
PILRB	ENSG00000121716	49.8197	0.68402	0.297542	2.2989	0.0215107	0.145849
VPS72	ENSG00000163159	85.8613	-0.765456	0.333063	-2.29823	0.0215488	0.14603
TBK1	ENSG00000183735	36.974	-0.902602	0.392848	-2.29758	0.0215855	0.146152
LINC00493	ENSG00000232388	357.653	-0.45753	0.199141	-2.29751	0.0215895	0.146152
SLC48A1	ENSG00000211584	14.3672	1.2307	0.535725	2.29726	0.021604	0.146172
SMC4	ENSG00000113810	329.43	-0.505053	0.219948	-2.29624	0.0216621	0.146398
NOL6	ENSG00000165271	38.9185	0.95268	0.414857	2.2964	0.0216528	0.146398
HTRA1	ENSG00000166033	17.4899	-1.17898	0.513477	-2.29607	0.0216717	0.146398
RERE	ENSG00000142599	121.221	0.689389	0.300301	2.29566	0.0216953	0.146404
ATP2C1	ENSG00000017260	102.435	0.523183	0.227891	2.29576	0.0216897	0.146404
SLC26A4	ENSG00000091137	13.2063	1.51889	0.661974	2.29448	0.0217627	0.146652
SECISBP2	ENSG00000187742	85.2628	0.620312	0.270353	2.29445	0.0217647	0.146652
MNS1	ENSG00000138587	49.8167	-0.821997	0.358259	-2.29442	0.0217665	0.146652
ARHGDIB	ENSG00000111348	76.8557	2.20357	0.960663	2.29381	0.0218016	0.146811
SDHAF1	ENSG00000205138	52.6398	-0.710096	0.309685	-2.29296	0.0218503	0.147062
SRPRB	ENSG00000144867	120.77	-0.57626	0.251419	-2.29204	0.0219036	0.147343
CAMSAP2	ENSG00000118200	47.8764	-0.68402	0.298547	-2.29117	0.0219538	0.147603
TAF7L	ENSG00000102387	18.7108	-1.21051	0.528438	-2.29073	0.0219791	0.147696
PMM1	ENSG00000100417	141.852	0.542923	0.237112	2.28973	0.0220368	0.148006
AR	ENSG00000169083	66.028	0.725917	0.317148	2.28889	0.0220857	0.148256
CCDC126	ENSG00000169193	8.67209	-1.47156	0.643122	-2.28815	0.022129	0.148404
IFT43	ENSG00000119650	98.5123	-0.595862	0.260439	-2.28792	0.0221424	0.148404
MAP1S	ENSG00000130479	38.0375	0.790116	0.34534	2.28793	0.0221414	0.148404
IFT52	ENSG00000101052	75.7575	-0.623857	0.2727	-2.2877	0.0221547	0.148409
ZNF106	ENSG00000103994	151.817	0.533648	0.233342	2.28697	0.0221975	0.148618
RGS20	ENSG00000147509	110.154	0.693293	0.303307	2.28578	0.0222671	0.149006
NEK7	ENSG00000151414	104.274	-0.562137	0.245983	-2.28527	0.0222973	0.14913
EXOC4	ENSG00000131558	54.8734	0.741872	0.324684	2.28491	0.0223183	0.149192
DNAJC10	ENSG00000077232	136.137	0.508992	0.222835	2.28417	0.0223617	0.149249
C18orf56	ENSG00000176912	55.6568	0.938116	0.410661	2.28441	0.0223477	0.149249
ZNF230	ENSG00000159882	9.96845	-1.38554	0.606586	-2.28417	0.0223617	0.149249
MAVS	ENSG00000088888	42.1886	0.749254	0.328121	2.28347	0.0224026	0.149444
KIAA0319L	ENSG00000142687	68.7241	0.688811	0.301707	2.28305	0.0224277	0.149455
RP11-112J3.16	ENSG00000227388	7.19022	2.18155	0.955516	2.28311	0.022424	0.149455
TAF9	ENSG00000085231	690.458	-0.498145	0.218281	-2.28213	0.0224816	0.149737
BNIP3L	ENSG00000104765	303.297	-0.599612	0.262798	-2.28165	0.0225101	0.149849
PALLD	ENSG00000129116	210.346	-0.467966	0.205171	-2.28085	0.0225572	0.15002
MARVELD1	ENSG00000155254	132.03	0.572838	0.251155	2.28082	0.0225592	0.15002
TMEM245	ENSG00000106771	70.5506	0.701288	0.30752	2.28046	0.0225803	0.150082
PANX2	ENSG00000073150	5.65326	2.47902	1.08716	2.28026	0.022592	0.150082
ATP5SL	ENSG00000105341	78.2314	-0.564518	0.247655	-2.27946	0.0226398	0.150322
GLUL	ENSG00000135821	39.3574	-0.925399	0.40604	-2.27908	0.0226621	0.150392
DDT	ENSG00000099977	919.456	0.437015	0.191783	2.27869	0.0226853	0.150468
SMG1	ENSG00000157106	60.9701	0.664452	0.291656	2.2782	0.0227145	0.150506
ISM1	ENSG00000101230	14.2096	1.34969	0.592414	2.27829	0.0227091	0.150506
PLSCR1	ENSG00000188313	108.225	-0.604624	0.265497	-2.27733	0.0227664	0.150772
ATP5B	ENSG00000110955	776.694	-0.472751	0.20763	-2.27689	0.0227926	0.150867
STX4	ENSG00000103496	154.617	0.513022	0.225639	2.27364	0.0229878	0.15208
TMEM60	ENSG00000135211	79.0836	-0.696641	0.306534	-2.27264	0.0230481	0.152401
ACTR10	ENSG00000131966	71.0951	-0.795381	0.350073	-2.27205	0.0230837	0.152557
METTL22	ENSG00000067365	36.6363	0.824425	0.362916	2.27167	0.0231065	0.152629
GCN1L1	ENSG00000089154	85.2694	0.629775	0.277283	2.27123	0.0231328	0.152724
VLDLR	ENSG00000147852	9.06727	-1.4621	0.643845	-2.27089	0.0231536	0.152783
VGF	ENSG00000128564	36.3735	-0.726348	0.319895	-2.27058	0.0231722	0.152827
C6orf106	ENSG00000196821	59.626	0.703408	0.30983	2.2703	0.0231894	0.152861
C4orf27	ENSG00000056050	99.8424	-0.639335	0.281801	-2.26874	0.0232839	0.153106
PDLIM7	ENSG00000196923	283.009	-0.602455	0.265565	-2.26857	0.0232942	0.153106
NHP2	ENSG00000145912	1544.82	-0.374155	0.164866	-2.26945	0.0232408	0.153106
DDAH2	ENSG00000213722	99.6626	-0.546741	0.241011	-2.26853	0.0232966	0.153106
AC009133.14	ENSG00000238045	1.84857	3.86377	1.70322	2.26851	0.0232982	0.153106
VAT1	ENSG00000108828	142.379	0.668519	0.294671	2.2687	0.0232867	0.153106
ARPC5	ENSG00000162704	989.672	-0.492265	0.217019	-2.2683	0.0233107	0.15311
CSTF3	ENSG00000176102	184.681	-0.572111	0.252325	-2.26736	0.0233682	0.153409
MXRA8	ENSG00000162576	156.153	-0.489465	0.21594	-2.26667	0.0234101	0.153605
TRIM25	ENSG00000121060	99.1202	0.55752	0.24599	2.26644	0.0234247	0.153622
RP11-792A8.4	ENSG00000272831	103.32	-0.837322	0.369553	-2.26577	0.0234654	0.15381
ZCCHC6	ENSG00000083223	20.7166	1.01798	0.449355	2.26543	0.0234863	0.153868
SH2D4A	ENSG00000104611	150.928	0.462815	0.204333	2.26501	0.0235122	0.15388
U2AF1	ENSG00000160201	738.968	-0.517668	0.228534	-2.26517	0.0235024	0.15388
CUL7	ENSG00000044090	18.4721	1.01062	0.446363	2.26411	0.0235673	0.153893
ZFPM2	ENSG00000169946	11.8474	-1.22588	0.541384	-2.26434	0.0235533	0.153893
ARHGAP32	ENSG00000134909	17.3524	1.09136	0.481966	2.26439	0.02355	0.153893
GCSH	ENSG00000140905	843.668	-0.430101	0.189916	-2.26469	0.0235319	0.153893
LPHN1	ENSG00000072071	3.79405	-2.1945	0.969303	-2.264	0.0235741	0.153893
NPRL2	ENSG00000114388	58.9421	-0.756451	0.334209	-2.26341	0.0236107	0.153975
FKBP3	ENSG00000100442	230.908	-0.626455	0.276757	-2.26355	0.0236017	0.153975
RICTOR	ENSG00000164327	54.3968	0.658047	0.290766	2.26315	0.0236264	0.153998
R3HCC1L	ENSG00000166024	35.9074	0.820314	0.362516	2.26284	0.0236458	0.154047
C9orf142	ENSG00000148362	387.716	0.527315	0.233058	2.26259	0.0236611	0.154068
RGS14	ENSG00000169220	2.35423	-2.91224	1.28744	-2.26204	0.023695	0.154132
GFRA1	ENSG00000151892	18.0113	-2.70286	1.19483	-2.26212	0.0236899	0.154132
NADK	ENSG00000008130	85.6516	0.716302	0.316723	2.26161	0.0237217	0.154227
NGDN	ENSG00000129460	74.2952	-0.6113	0.270358	-2.26108	0.0237544	0.154361
PSMA4	ENSG00000041357	751.344	-0.775454	0.34299	-2.26087	0.0237674	0.154368
SERPINE2	ENSG00000135919	269.551	-0.779603	0.345092	-2.25911	0.0238764	0.154997
ABCA7	ENSG00000064687	15.1194	-1.38415	0.612768	-2.25886	0.0238924	0.155022
UBE2V2	ENSG00000169139	364.315	-0.565654	0.250449	-2.25856	0.0239107	0.155063
KLF5	ENSG00000102554	27.8783	1.05708	0.468226	2.25762	0.0239693	0.155364
ITSN1	ENSG00000205726	97.1553	-0.625267	0.277203	-2.25563	0.0240939	0.156092
ANLN	ENSG00000011426	87.34	-0.638192	0.283109	-2.25423	0.0241818	0.156473
C9orf3	ENSG00000148120	222.976	0.536496	0.238008	2.25411	0.0241893	0.156473
USP22	ENSG00000124422	226.901	0.549284	0.243666	2.25426	0.0241801	0.156473
SLC36A4	ENSG00000180773	58.3434	-0.695553	0.308624	-2.25373	0.0242134	0.15655
TRAF4	ENSG00000076604	114.743	0.647489	0.28742	2.25276	0.024274	0.156863
QPRT	ENSG00000103485	2.07307	-3.3234	1.47548	-2.25242	0.0242959	0.156925
PGRMC1	ENSG00000101856	239.671	-0.543445	0.241615	-2.24922	0.0244988	0.158155
POLR3E	ENSG00000058600	33.14	0.881916	0.392213	2.24857	0.0245401	0.158343
BUB3	ENSG00000154473	563.646	-0.573883	0.255294	-2.24793	0.0245806	0.158447
RPN2	ENSG00000118705	373.091	-0.502278	0.223441	-2.24792	0.0245811	0.158447
ZNF514	ENSG00000144026	25.2811	0.956795	0.425679	2.24769	0.0245959	0.158463
CHD4	ENSG00000111642	254.451	0.397874	0.177047	2.24727	0.0246226	0.158555
CTD-2263F21.1	ENSG00000251257	7.18137	1.89841	0.845248	2.24598	0.0247052	0.158848
ESCO2	ENSG00000171320	35.5957	-0.796871	0.35479	-2.24604	0.0247016	0.158848
CHMP2A	ENSG00000130724	412.024	-0.475284	0.2116	-2.24615	0.0246946	0.158848
GALNT16	ENSG00000100626	2.45005	-2.98326	1.32857	-2.24547	0.0247382	0.1589
FBL	ENSG00000105202	409.002	-0.436838	0.194529	-2.24562	0.0247282	0.1589
YTHDF2	ENSG00000198492	137.208	-0.468007	0.208538	-2.24422	0.0248181	0.159006
SCOC	ENSG00000153130	157.163	-0.59493	0.265094	-2.24422	0.0248181	0.159006
CCND3	ENSG00000112576	191.571	0.455064	0.20278	2.24413	0.0248238	0.159006
RGS17	ENSG00000091844	18.7663	0.997809	0.444647	2.24405	0.0248292	0.159006
[truncated: 17,447 more rows]

## Sheet: S6b (S)
Supplemental Table S6: scRNA-seq phase-specific DE results. b DE analysis results (DESeq2 output) comparing NHA-CICKO versus NHA-CICWT cells assigned to the S phase. Base mean: mean of normalized counts for all samples. SE: standard error. Stat: Wald statistic. Adjusted p-values were obtained using the Benjamini-Hochberg method. Genes without adjusted p-values were filtered by automatic independe…
gene name	ensembl ID	base mean	log2 fold-change	log fold-change SE	stat	p-value	adjusted p-value
THY1	ENSG00000154096	128.804	-10.5729	1.04664	-10.1018	5.42623e-24	3.21721e-20
DUSP23	ENSG00000158716	66.6169	-3.50403	0.365054	-9.59866	8.09931e-22	2.40104e-18
TNNT1	ENSG00000105048	48.0937	-4.1953	0.451107	-9.3	1.40441e-20	2.77559e-17
GYPC	ENSG00000136732	78.1092	2.57271	0.294212	8.74442	2.24166e-18	3.3227e-15
INHBA	ENSG00000122641	70.0793	-2.83277	0.396489	-7.14464	9.02295e-13	1.06994e-09
TUBA1A	ENSG00000167552	71.4181	-2.19272	0.320719	-6.83689	8.09282e-12	7.99706e-09
AGPAT2	ENSG00000169692	36.4383	-2.20931	0.354671	-6.22917	4.68906e-10	3.97163e-07
HIST1H1D	ENSG00000124575	144.122	-2.04875	0.330512	-6.19872	5.69228e-10	4.21869e-07
CCL2	ENSG00000108691	44.5503	-8.28726	1.34803	-6.14769	7.86206e-10	5.17935e-07
ETV4	ENSG00000175832	30.7649	2.56126	0.419268	6.10889	1.00327e-09	5.94837e-07
NREP	ENSG00000134986	49.1785	-2.08605	0.351164	-5.94038	2.84356e-09	1.53268e-06
EVC	ENSG00000072840	81.3484	1.69705	0.291372	5.82434	5.734e-09	2.83307e-06
SLC7A11	ENSG00000151012	65.3988	1.77105	0.305162	5.80366	6.48845e-09	2.95923e-06
TGFB2	ENSG00000092969	67.3506	-1.80639	0.318142	-5.67793	1.36335e-08	5.7738e-06
PLAU	ENSG00000122861	300.803	1.34455	0.240738	5.58511	2.33553e-08	9.23156e-06
TMEM205	ENSG00000105518	25.6254	-2.28862	0.414929	-5.51569	3.47409e-08	1.28737e-05
PYGB	ENSG00000100994	109.623	1.22393	0.227967	5.36889	7.92207e-08	2.76294e-05
FSTL1	ENSG00000163430	100.693	-1.25146	0.235536	-5.31322	1.07703e-07	3.54763e-05
HSPB1	ENSG00000106211	1157.54	-0.828617	0.158135	-5.23992	1.60646e-07	5.01302e-05
CTSD	ENSG00000117984	337.238	0.924774	0.181517	5.0947	3.49298e-07	9.86186e-05
SREBF2	ENSG00000198911	55.799	1.66784	0.327246	5.09661	3.45795e-07	9.86186e-05
HPCAL1	ENSG00000115756	197.074	1.28847	0.254991	5.05299	4.34955e-07	0.000106409
SEPT7	ENSG00000122545	193.047	-1.34416	0.266722	-5.03955	4.66627e-07	0.000106409
SDC2	ENSG00000169439	64.787	-1.76143	0.347914	-5.06282	4.13107e-07	0.000106409
LINC00704	ENSG00000231298	24.2724	2.61961	0.519263	5.04486	4.53848e-07	0.000106409
TRIOBP	ENSG00000100106	109.107	1.40327	0.278434	5.03988	4.65829e-07	0.000106409
TMCO1	ENSG00000143183	120.268	-1.14814	0.228639	-5.02166	5.12272e-07	0.000112491
COMMD6	ENSG00000188243	753.757	0.924403	0.185953	4.97116	6.65532e-07	0.000140926
SERPINB2	ENSG00000197632	34.3153	2.90189	0.587864	4.93632	7.96093e-07	0.000157335
FAM207A	ENSG00000160256	93.1442	-1.19216	0.241322	-4.94009	7.80857e-07	0.000157335
MT1X	ENSG00000187193	168.923	-1.44752	0.295742	-4.89452	9.85452e-07	0.000188476
HHIP	ENSG00000164161	186.57	-1.11635	0.228947	-4.87603	1.08242e-06	0.000200551
HMGA1	ENSG00000137309	2208.54	0.941701	0.1962	4.79969	1.58909e-06	0.000285507
SBDS	ENSG00000126524	196.897	-0.971313	0.203478	-4.77354	1.81014e-06	0.000315657
GUCD1	ENSG00000138867	84.9568	1.28819	0.270959	4.75421	1.99225e-06	0.000337487
ATF4	ENSG00000128272	292.43	0.89662	0.192695	4.65306	3.27039e-06	0.000538616
PXN	ENSG00000089159	69.0066	1.28197	0.277127	4.62591	3.72951e-06	0.000597629
SGCB	ENSG00000163069	62.2401	-1.33553	0.289232	-4.61751	3.88368e-06	0.000605957
GLIPR1	ENSG00000139278	352.194	-0.868444	0.188616	-4.60431	4.13844e-06	0.000629149
C1orf198	ENSG00000119280	27.9235	-1.86923	0.407574	-4.58624	4.513e-06	0.000668939
GNG11	ENSG00000127920	269.633	1.85247	0.405921	4.56364	5.02749e-06	0.000693209
CTHRC1	ENSG00000164932	28.1205	-2.0524	0.449502	-4.56594	4.97259e-06	0.000693209
FAM129B	ENSG00000136830	170.538	1.08235	0.236663	4.57339	4.79896e-06	0.000693209
DDB2	ENSG00000134574	49.7977	-1.36861	0.300338	-4.55691	5.19127e-06	0.000699524
ADAMTSL1	ENSG00000178031	31.8178	1.70211	0.374486	4.54518	5.48894e-06	0.000702251
NUP188	ENSG00000095319	82.5885	1.24991	0.275176	4.54221	5.56684e-06	0.000702251
ARID5B	ENSG00000150347	169.628	-1.20403	0.264773	-4.54741	5.43097e-06	0.000702251
RABL6	ENSG00000196642	265.344	0.921703	0.204862	4.49913	6.82311e-06	0.000842796
TJP2	ENSG00000119139	85.9695	1.1446	0.254726	4.49346	7.00755e-06	0.000847913
CERK	ENSG00000100422	53.652	1.34644	0.302893	4.44526	8.77869e-06	0.00104098
PSCA	ENSG00000167653	55.592	2.05165	0.462895	4.4322	9.32749e-06	0.00106351
NLRP1	ENSG00000091592	236.271	-1.46903	0.331306	-4.43405	9.24803e-06	0.00106351
PLAT	ENSG00000104368	36.2586	1.52843	0.349524	4.37289	1.22611e-05	0.00136973
AP1B1	ENSG00000100280	74.1459	1.24608	0.285202	4.36911	1.24751e-05	0.00136973
OCIAD2	ENSG00000145247	230.41	-1.29196	0.296295	-4.36037	1.29845e-05	0.00137474
TPM1	ENSG00000140416	1306.38	-0.860296	0.197223	-4.36205	1.28848e-05	0.00137474
CYCS	ENSG00000172115	548.707	-1.10655	0.254059	-4.35549	1.32767e-05	0.00138101
BGN	ENSG00000182492	105.154	-1.44934	0.336106	-4.31216	1.61669e-05	0.00162463
C12orf75	ENSG00000235162	582.079	-0.890037	0.206311	-4.31405	1.60292e-05	0.00162463
TRAM1	ENSG00000067167	132.061	-1.03339	0.240801	-4.29146	1.77505e-05	0.0017253
SPECC1L	ENSG00000100014	37.9125	1.46361	0.340832	4.29422	1.75305e-05	0.0017253
PLP2	ENSG00000102007	430.025	-0.956193	0.223929	-4.27007	1.95414e-05	0.00186872
AIMP2	ENSG00000106305	75.4625	-1.32563	0.310964	-4.26296	2.0174e-05	0.0018986
HN1	ENSG00000189159	536.031	-0.787873	0.185355	-4.25061	2.13193e-05	0.00197503
DNAJB11	ENSG00000090520	125.855	-1.09354	0.257852	-4.24096	2.22569e-05	0.00203017
ENTPD6	ENSG00000197586	60.8413	1.18253	0.279532	4.2304	2.33273e-05	0.00209557
TIPRL	ENSG00000143155	58.2733	-1.24622	0.297007	-4.19594	2.71747e-05	0.0023911
SCARA3	ENSG00000168077	70.0162	1.17778	0.280834	4.19387	2.74237e-05	0.0023911
PHLDA1	ENSG00000139289	399.897	1.22355	0.292096	4.18888	2.80337e-05	0.00240886
MED15	ENSG00000099917	62.4332	1.23663	0.296029	4.17741	2.94848e-05	0.00249737
CBX6	ENSG00000183741	96.064	1.1707	0.281147	4.164	3.12718e-05	0.00261142
EFEMP1	ENSG00000115380	39.4023	-1.46953	0.354079	-4.15029	3.32048e-05	0.00266042
GPR56	ENSG00000205336	23.4651	1.69331	0.407979	4.15047	3.31789e-05	0.00266042
GTSE1	ENSG00000075218	158.211	0.932555	0.22462	4.15169	3.30022e-05	0.00266042
EFHD2	ENSG00000142634	137.655	1.10412	0.266944	4.13615	3.53182e-05	0.00279202
PAWR	ENSG00000177425	330.671	-0.911898	0.22127	-4.1212	3.76903e-05	0.00286495
DLL3	ENSG00000090932	24.6237	-1.58766	0.385082	-4.1229	3.74128e-05	0.00286495
C22orf39	ENSG00000242259	100.125	0.99641	0.241733	4.12194	3.75689e-05	0.00286495
CARD10	ENSG00000100065	36.6829	1.51141	0.367216	4.11585	3.8575e-05	0.00289508
G6PD	ENSG00000160211	123.224	0.979247	0.238196	4.11111	3.93767e-05	0.00291831
TUBB2A	ENSG00000137267	39.832	-1.60586	0.392593	-4.09039	4.30643e-05	0.0031522
SNCA	ENSG00000145335	34.0226	1.74786	0.427837	4.08534	4.40122e-05	0.0031823
LARP6	ENSG00000166173	195.385	0.775934	0.19073	4.06823	4.73714e-05	0.0033601
TXNRD2	ENSG00000184470	143.782	1.16746	0.287051	4.06709	4.76047e-05	0.0033601
DUSP5	ENSG00000138166	73.9788	1.39134	0.344924	4.03375	5.48946e-05	0.00380095
TPCN1	ENSG00000186815	55.1747	1.27738	0.316752	4.03273	5.51327e-05	0.00380095
EMP1	ENSG00000134531	31.2202	1.731	0.429906	4.02647	5.66207e-05	0.00385867
ISG15	ENSG00000187608	206.019	-1.17815	0.293711	-4.01124	6.04e-05	0.00406945
ZC3H7B	ENSG00000100403	103.077	1.12355	0.280286	4.00857	6.10886e-05	0.0040696
PSMA2_ENSG00000106588	ENSG00000106588	183.403	-1.04062	0.26003	-4.00193	6.28273e-05	0.00409344
ISOC2	ENSG00000063241	124.286	-0.872239	0.217925	-4.00248	6.2683e-05	0.00409344
DOT1L	ENSG00000104885	40.1375	1.78648	0.448028	3.98743	6.67934e-05	0.00430455
CD164	ENSG00000135535	111.848	-0.883934	0.222423	-3.97412	7.0641e-05	0.00445565
CSNK1E	ENSG00000213923	161.241	1.02645	0.258245	3.97471	7.04645e-05	0.00445565
ACO1	ENSG00000122729	82.7601	1.08756	0.274169	3.96674	7.28631e-05	0.00454743
NEXN	ENSG00000162614	180.276	-0.852925	0.215441	-3.95897	7.52741e-05	0.00460905
CRABP2	ENSG00000143320	62.691	-1.34118	0.339015	-3.9561	7.61826e-05	0.00460905
UBE2E2	ENSG00000182247	50.1257	-1.14275	0.288684	-3.95848	7.54282e-05	0.00460905
CRAT	ENSG00000095321	44.1155	1.25156	0.316622	3.95285	7.72251e-05	0.00462245
PSAP	ENSG00000197746	376.062	0.743744	0.188262	3.95058	7.79634e-05	0.00462245
TMEM54	ENSG00000121900	114.412	-0.995445	0.253454	-3.92751	8.58293e-05	0.00503844
SLC7A2	ENSG00000003989	33.8164	-1.81589	0.463435	-3.91832	8.91665e-05	0.00518302
SPARC	ENSG00000113140	589.509	-0.835403	0.213995	-3.90384	9.46768e-05	0.00539749
MDK	ENSG00000110492	242.917	-0.977961	0.25049	-3.90419	9.45406e-05	0.00539749
C22orf29	ENSG00000215012	44.5893	1.26056	0.32366	3.89471	9.83158e-05	0.00555156
SSR2	ENSG00000163479	322.332	-0.756202	0.194548	-3.88697	0.000101505	0.00567757
RCAN1	ENSG00000159200	21.8552	-2.04239	0.526023	-3.8827	0.000103304	0.0057242
LITAF	ENSG00000189067	50.1032	-1.14264	0.295087	-3.87219	0.00010786	0.00592134
UBE2D1	ENSG00000072401	51.3842	-1.12153	0.289974	-3.8677	0.000109865	0.00597604
LAPTM4A	ENSG00000068697	200.578	-1.1793	0.30542	-3.86124	0.000112813	0.00608063
GLRX3	ENSG00000108010	246.494	-1.03335	0.268219	-3.85265	0.000116846	0.00624128
RTKN2	ENSG00000182010	30.8198	-1.32829	0.345169	-3.84824	0.00011897	0.00629796
TBC1D2	ENSG00000095383	48.5366	1.17215	0.305065	3.84229	0.000121893	0.00639562
RPS19BP1	ENSG00000187051	603.063	0.724306	0.189095	3.83039	0.000127943	0.00665415
IGFBP3	ENSG00000146674	34.7809	-2.00694	0.524566	-3.8259	0.000130294	0.00667738
FSTL3	ENSG00000070404	60.0648	-1.38799	0.36285	-3.82525	0.000130642	0.00667738
SQSTM1	ENSG00000161011	474.785	0.692863	0.181355	3.82048	0.000133194	0.00674965
IGFBP7	ENSG00000163453	1227.13	-1.37608	0.361712	-3.80437	0.000142168	0.00714334
C11orf68	ENSG00000175573	44.0431	1.22889	0.323208	3.80215	0.000143443	0.00714685
PPM1F	ENSG00000100034	45.1232	1.31817	0.346894	3.79993	0.000144736	0.00715115
RALA	ENSG00000006451	120.175	-1.00553	0.265188	-3.79174	0.000149595	0.00733015
SBNO2	ENSG00000064932	31.5123	1.54265	0.407279	3.7877	0.000152051	0.00738943
POPDC3	ENSG00000132429	21.6338	1.66711	0.44072	3.78268	0.000155146	0.00742439
TRMT6	ENSG00000089195	63.9091	-1.11837	0.29567	-3.78248	0.000155275	0.00742439
FHL2	ENSG00000115641	470.499	-0.694748	0.184103	-3.7737	0.000160847	0.00751252
CTGF	ENSG00000118523	691.421	-1.14411	0.303047	-3.77537	0.000159772	0.00751252
RP11-160O5.1	ENSG00000263470	46.067	1.60251	0.424665	3.77358	0.000160919	0.00751252
SLC26A2	ENSG00000155850	35.918	-1.37904	0.365836	-3.76955	0.000163542	0.00757533
TMEM184B	ENSG00000198792	60.281	1.22166	0.324303	3.76705	0.000165187	0.00759221
MDH2	ENSG00000146701	161.124	-0.789474	0.209688	-3.765	0.000166551	0.00759602
TTLL12	ENSG00000100304	43.3238	1.29479	0.344805	3.75514	0.000173245	0.007841
RANGAP1	ENSG00000100401	125.787	1.12817	0.30097	3.74846	0.000177923	0.00798565
NCAPH2	ENSG00000025770	69.9541	1.03795	0.277027	3.74676	0.000179135	0.00798565
GGA1	ENSG00000100083	50.3091	1.23113	0.32879	3.74443	0.000180801	0.00799978
HIST1H2BK	ENSG00000197903	195.814	1.01785	0.273387	3.7231	0.000196792	0.00857926
PSTK	ENSG00000179988	41.2402	-1.21094	0.325168	-3.72404	0.000196059	0.00857926
TNFRSF1A	ENSG00000067182	154.78	0.871434	0.234355	3.71844	0.000200457	0.00867525
UAP1	ENSG00000117143	107.956	-1.08814	0.292918	-3.71484	0.000203333	0.00873596
ATXN2L	ENSG00000168488	96.1502	0.94526	0.254939	3.70778	0.000209081	0.00891829
TXNRD1	ENSG00000198431	363.568	1.22208	0.329881	3.70463	0.0002117	0.0089655
BCR	ENSG00000186716	37.7829	1.26579	0.341935	3.70186	0.000214023	0.0089996
UBE2D3	ENSG00000109332	194.813	-0.753943	0.204492	-3.68691	0.000226998	0.00941167
EPN2	ENSG00000072134	31.6826	1.32892	0.360308	3.68828	0.000225775	0.00941167
EEF2	ENSG00000167658	1105.44	0.604352	0.164537	3.67305	0.000239677	0.00986837
SBF1	ENSG00000100241	26.9303	1.54923	0.422463	3.66714	0.000245279	0.0100294
ADAM12	ENSG00000148848	40.7079	1.2313	0.336249	3.66187	0.000250377	0.0101677
SMDT1	ENSG00000183172	287.744	0.901329	0.247594	3.64035	0.000272263	0.0109813
RP11-879F14.2	ENSG00000267279	25.3997	1.47598	0.405918	3.63615	0.000276742	0.0110865
COLGALT1	ENSG00000130309	68.5519	1.16855	0.321814	3.63113	0.00028218	0.0112285
WBSCR22	ENSG00000071462	151.601	-0.844934	0.232966	-3.62685	0.000286897	0.011265
PSMG1	ENSG00000183527	145.397	-1.02161	0.281576	-3.62819	0.000285414	0.011265
MYCBP2	ENSG00000005810	88.341	0.95593	0.26434	3.61629	0.000298854	0.0116573
SPEG	ENSG00000072195	42.0965	1.2449	0.344487	3.61378	0.000301765	0.0116939
YWHAQ	ENSG00000134308	429.983	-0.855593	0.237215	-3.60683	0.000309962	0.0119335
PTGES3	ENSG00000110958	387.702	-0.703107	0.195415	-3.59802	0.000320654	0.0122655
MARCKSL1	ENSG00000175130	162.553	-1.22037	0.33943	-3.59534	0.000323972	0.012313
NDUFS4	ENSG00000164258	209.722	-1.07986	0.301159	-3.58569	0.000336186	0.0126958
PSMC4	ENSG00000013275	132.407	-1.08589	0.303031	-3.58341	0.000339133	0.0127261
MCM5	ENSG00000100297	110.403	0.949619	0.265364	3.57856	0.000345494	0.0128832
DCUN1D5	ENSG00000137692	105.865	-1.22056	0.341355	-3.57562	0.000349401	0.0129475
ATP1B3	ENSG00000069849	184.873	-0.922173	0.258451	-3.56808	0.000359605	0.0132428
TBC1D4	ENSG00000136111	38.9319	1.14356	0.320871	3.56393	0.000365341	0.013371
SH3GLB2	ENSG00000148341	65.8742	0.989816	0.278336	3.55619	0.000376274	0.0136063
SH2B3	ENSG00000111252	84.1496	1.13083	0.317994	3.55613	0.00037636	0.0136063
SPHK1	ENSG00000176170	97.3603	1.10436	0.310811	3.55317	0.000380621	0.013677
CD82	ENSG00000085117	42.8263	1.17669	0.33162	3.54829	0.000387736	0.0138487
PRRC2B	ENSG00000130723	104.788	0.889166	0.251801	3.53123	0.000413633	0.0146852
CCT6A	ENSG00000146731	554.515	-0.892017	0.253049	-3.52507	0.000423372	0.0149415
COL7A1	ENSG00000114270	45.0781	1.41723	0.403527	3.5121	0.000444574	0.0154145
RPS12	ENSG00000112306	4858.92	0.804756	0.228972	3.51464	0.000440345	0.0154145
TFPI2	ENSG00000105825	94.4861	1.38949	0.395512	3.51314	0.000442841	0.0154145
CSRP2	ENSG00000175183	157.359	-1.20041	0.343704	-3.49258	0.000478384	0.016395
MAFF	ENSG00000185022	54.0729	1.53377	0.439094	3.49303	0.000477571	0.016395
CSF1	ENSG00000184371	22.6651	1.83356	0.526043	3.48557	0.00049109	0.0165329
SRSF7	ENSG00000115875	398.33	-0.707657	0.202851	-3.48855	0.000485642	0.0165329
VDAC1	ENSG00000213585	252.706	-0.869118	0.249444	-3.48423	0.000493561	0.0165329
NDFIP1	ENSG00000131507	47.6936	-1.09879	0.315242	-3.48553	0.000491157	0.0165329
LONP1	ENSG00000196365	65.4253	0.910439	0.263251	3.45845	0.000543293	0.0180965
TMED2	ENSG00000086598	259.419	-0.672063	0.194861	-3.44894	0.000562794	0.0186414
H2AFY	ENSG00000113648	243.556	-0.745356	0.216373	-3.44478	0.000571534	0.0188257
PGF	ENSG00000119630	29.0713	1.88833	0.548655	3.44174	0.000577991	0.0188935
THBS1	ENSG00000137801	74.7278	-1.07414	0.312177	-3.44082	0.000579965	0.0188935
CPA4	ENSG00000128510	256.394	0.679091	0.197497	3.43848	0.000584983	0.0189528
KLHL35	ENSG00000149243	22.9863	-1.52147	0.443015	-3.43436	0.000593966	0.0191392
COPS4	ENSG00000138663	44	-1.27945	0.37347	-3.42585	0.000612874	0.0196418
C9orf69	ENSG00000238227	58.5895	0.962898	0.281282	3.42325	0.000618764	0.0197239
NT5C3A	ENSG00000122643	26.9393	-1.24359	0.363763	-3.41869	0.00062924	0.0198445
TMEM66	ENSG00000133872	145.062	-0.758834	0.221891	-3.41984	0.000626569	0.0198445
RAB31	ENSG00000168461	80.0181	0.951146	0.279315	3.40528	0.000660953	0.0207343
AIM1	ENSG00000112297	22.5979	1.44955	0.426418	3.39936	0.000675438	0.0210772
FBLN2	ENSG00000163520	26.1562	1.33725	0.393909	3.39482	0.000686741	0.0213177
MRPL32	ENSG00000106591	142.981	-0.874289	0.257655	-3.39325	0.000690674	0.0213282
CYB5R3	ENSG00000100243	243.918	0.814589	0.240285	3.39009	0.000698686	0.0214638
PACSIN2	ENSG00000100266	64.86	0.897491	0.264961	3.38726	0.000705953	0.0215752
PSMD8	ENSG00000099341	377.288	-0.720351	0.213291	-3.37731	0.000731989	0.0222562
RXRA	ENSG00000186350	49.4348	1.02018	0.302245	3.37533	0.000737271	0.0223025
TLE1	ENSG00000196781	25.2126	1.53594	0.455591	3.37131	0.00074812	0.0225158
FH	ENSG00000091483	91.5979	-0.99123	0.294437	-3.36653	0.000761202	0.0227938
PLXNB2	ENSG00000196576	71.5226	0.999611	0.297108	3.36448	0.00076689	0.0228487
SLC25A37	ENSG00000147454	98.1128	0.832731	0.247796	3.36055	0.000777878	0.0229526
ALG8	ENSG00000159063	35.8149	-1.43226	0.42621	-3.36046	0.000778121	0.0229526
UQCRFS1	ENSG00000169021	292.467	-0.713686	0.21281	-3.35364	0.000797562	0.0234096
HSP90AA1	ENSG00000080824	1034.68	-0.76981	0.229849	-3.3492	0.000810445	0.0236706
GOLM1	ENSG00000135052	75.551	0.894958	0.26805	3.33878	0.000841485	0.0244567
CHCHD5	ENSG00000125611	116.688	0.731043	0.219236	3.3345	0.000854532	0.0247147
PSMA1	ENSG00000129084	200.854	-0.936358	0.281409	-3.32739	0.000876628	0.0252307
DENND1A	ENSG00000119522	24.0388	1.36704	0.411646	3.32092	0.000897216	0.0256985
GBAS	ENSG00000146729	66.4623	-1.09744	0.330723	-3.31831	0.000905649	0.0258153
RNF130	ENSG00000113269	27.1321	-1.42877	0.431167	-3.31373	0.000920604	0.0258569
INA	ENSG00000148798	71.2818	-0.920856	0.277854	-3.31418	0.000919129	0.0258569
CD59	ENSG00000085063	619.772	-0.728554	0.219939	-3.31253	0.000924551	0.0258569
ACO2	ENSG00000100412	71.9471	0.888076	0.268028	3.31338	0.000921772	0.0258569
RNASEH1	ENSG00000171865	116.677	-0.775302	0.234715	-3.30316	0.000956027	0.0266117
ANTXR2	ENSG00000163297	21.4365	1.73014	0.524314	3.29981	0.000967503	0.0266806
CHPF2	ENSG00000033100	29.161	1.28111	0.388159	3.30047	0.00096522	0.0266806
HPS1	ENSG00000107521	147.675	0.788109	0.239043	3.29693	0.000977487	0.0267075
FERMT2	ENSG00000073712	59.1901	-0.911361	0.276322	-3.29818	0.000973147	0.0267075
CBX3	ENSG00000122565	329.808	-0.811915	0.246468	-3.2942	0.000987014	0.0268441
GMPR	ENSG00000137198	29.1927	1.33033	0.404347	3.29007	0.00100162	0.0271169
RPL26L1	ENSG00000037241	147.109	-1.04802	0.319522	-3.27998	0.00103816	0.0279784
G0S2	ENSG00000123689	620.816	2.19731	0.670475	3.27725	0.00104824	0.0281221
SLFN5	ENSG00000166750	34.7491	1.20091	0.367173	3.27069	0.00107285	0.0286528
IL32	ENSG00000008517	36.7798	-1.35071	0.414613	-3.25776	0.00112297	0.0298568
B4GALT1	ENSG00000086062	42.5503	1.08698	0.334009	3.25435	0.00113652	0.0300822
DST	ENSG00000151914	241.354	0.909886	0.279723	3.25281	0.00114271	0.0301117
MDFIC	ENSG00000135272	36.9561	1.16551	0.359231	3.24447	0.0011767	0.0308702
TEX264	ENSG00000164081	82.5616	-0.83977	0.258997	-3.2424	0.00118529	0.0309587
C21orf59	ENSG00000159079	70.2277	-0.945892	0.291846	-3.24106	0.00119086	0.0309676
ILF2	ENSG00000143621	196.607	-0.777138	0.240065	-3.23719	0.00120712	0.0311389
EIF4A3	ENSG00000141543	127.003	-0.8649	0.267192	-3.237	0.00120795	0.0311389
RRP15	ENSG00000067533	58.1019	-0.984543	0.304826	-3.22986	0.00123852	0.0317363
SMPD4	ENSG00000136699	59.7364	0.978464	0.303082	3.22838	0.00124493	0.0317363
C9orf16	ENSG00000171159	357.844	0.648366	0.200865	3.22786	0.00124718	0.0317363
UBE2D2	ENSG00000131508	250.589	-0.680481	0.211073	-3.22391	0.00126455	0.0320406
PPIC	ENSG00000168938	127.403	-1.13702	0.352871	-3.22219	0.00127213	0.0320957
CLTB	ENSG00000175416	290.31	-0.599946	0.186438	-3.21794	0.00129115	0.0324374
SRSF2	ENSG00000161547	479.124	-0.552909	0.171994	-3.2147	0.00130581	0.0326673
ACP1	ENSG00000143727	343.033	-0.64575	0.201365	-3.20686	0.00134194	0.0332901
SLC20A1	ENSG00000144136	106.547	0.970213	0.302484	3.20748	0.00133902	0.0332901
SNRPD2	ENSG00000125743	517.369	-0.655121	0.204602	-3.20193	0.00136511	0.0337239
CANT1	ENSG00000171302	46.8092	1.04214	0.325902	3.1977	0.00138527	0.0340799
FANCA	ENSG00000187741	66.8902	0.882507	0.276326	3.19372	0.00140454	0.0344112
ARF4	ENSG00000168374	211.375	-1.14532	0.358895	-3.19124	0.00141662	0.0344228
GGH	ENSG00000137563	144.888	-0.966925	0.302986	-3.19132	0.00141626	0.0344228
RGS20	ENSG00000147509	49.7356	0.989001	0.310086	3.18945	0.00142546	0.034496
NIT2	ENSG00000114021	78.4978	-0.947148	0.297536	-3.18331	0.00145604	0.0345178
FOXM1	ENSG00000111206	154.098	0.799982	0.251188	3.18479	0.00144858	0.0345178
NQO1	ENSG00000181019	453.804	1.21681	0.382305	3.18282	0.00145846	0.0345178
C18orf56	ENSG00000176912	29.0517	1.2909	0.405185	3.18595	0.00144278	0.0345178
MYO9B	ENSG00000099331	55.7023	0.914298	0.287274	3.18267	0.00145923	0.0345178
L3MBTL2	ENSG00000100395	33.612	1.19085	0.374216	3.18226	0.00146129	0.0345178
UCP2	ENSG00000175567	66.2131	-0.811471	0.255388	-3.17741	0.00148597	0.0346336
SPCS2	ENSG00000118363	214.438	-1.02328	0.322119	-3.17671	0.00148955	0.0346336
SPC24	ENSG00000161888	46.2061	0.965513	0.3039	3.17707	0.0014877	0.0346336
PPP6R2	ENSG00000100239	35.6649	1.10532	0.347757	3.17844	0.00148071	0.0346336
CARS2	ENSG00000134905	92.2967	0.862603	0.272209	3.1689	0.00153016	0.0353008
MIF	ENSG00000240972	881.683	0.747796	0.235914	3.16978	0.00152552	0.0353008
LDHA	ENSG00000134333	1353.71	-1.07076	0.338073	-3.16726	0.00153885	0.0353638
DTD1	ENSG00000125821	133.725	-0.713478	0.225452	-3.16465	0.00155269	0.035544
UBE3C	ENSG00000009335	66.7386	0.904342	0.285953	3.16255	0.00156394	0.0356638
COMMD10	ENSG00000145781	26.7849	-1.31797	0.417072	-3.16004	0.00157745	0.0358341
DERL2	ENSG00000072849	109.254	-0.951232	0.301286	-3.15724	0.00159271	0.0360428
PCNP	ENSG00000081154	165.26	-0.640108	0.203002	-3.1532	0.0016149	0.0361311
STC2	ENSG00000113739	910.463	-0.574072	0.181997	-3.1543	0.00160885	0.0361311
C11orf58	ENSG00000110696	339.21	-0.885389	0.280753	-3.15362	0.00161259	0.0361311
NRP1	ENSG00000099250	60.8557	0.871062	0.276981	3.14485	0.00166174	0.0369684
MBD3	ENSG00000071655	98.3122	0.837798	0.266449	3.14431	0.00166479	0.0369684
YWHAB	ENSG00000166913	498.076	-0.62379	0.198765	-3.13833	0.00169913	0.0375901
MAD2L1	ENSG00000164109	128.416	-0.929305	0.29644	-3.13488	0.00171923	0.0378933
HSPA5	ENSG00000044574	269.303	-0.930912	0.297067	-3.13368	0.00172628	0.0379078
SUCLG1	ENSG00000163541	121.97	-1.01424	0.323929	-3.13106	0.00174174	0.0381062
THOC7	ENSG00000163634	150.96	-0.764711	0.244863	-3.12301	0.00179011	0.0387356
NDUFC2	ENSG00000151366	475.184	-0.714658	0.228759	-3.12407	0.0017837	0.0387356
MFSD12	ENSG00000161091	67.4119	0.951593	0.30465	3.12356	0.00178675	0.0387356
RHOA	ENSG00000067560	329.807	-0.68081	0.218204	-3.12007	0.00180811	0.0388706
SCRIB	ENSG00000180900	36.7445	1.08614	0.348259	3.11878	0.00181601	0.0388706
TAOK2	ENSG00000149930	24.5558	1.26837	0.406586	3.11956	0.00181124	0.0388706
MTFP1	ENSG00000242114	58.3055	0.938562	0.301338	3.11465	0.00184164	0.0392774
PIR	ENSG00000087842	30.9013	1.22579	0.393987	3.11123	0.00186309	0.0395922
MANF	ENSG00000145050	172.741	-0.769093	0.247509	-3.10733	0.00188788	0.0396742
GJA1	ENSG00000152661	72.8229	-0.797832	0.256778	-3.10709	0.00188941	0.0396742
HMGB3	ENSG00000029993	101.201	-0.730199	0.235089	-3.10605	0.00189602	0.0396742
PCNA	ENSG00000132646	336.188	-0.974893	0.313532	-3.10939	0.00187474	0.0396742
PRMT1	ENSG00000126457	203.881	-0.757468	0.243922	-3.10537	0.0019004	0.0396742
GSR	ENSG00000104687	27.9589	1.15147	0.370944	3.10415	0.00190824	0.0396981
CDC42	ENSG00000070831	188.94	-0.674495	0.217764	-3.09737	0.00195246	0.0403349
SAR1B	ENSG00000152700	65.4445	-0.887972	0.286603	-3.09826	0.00194659	0.0403349
AMPH	ENSG00000078053	21.3503	-1.44809	0.468084	-3.09367	0.001977	0.0407
IRAK1	ENSG00000184216	194.224	0.638857	0.206596	3.0923	0.00198609	0.0407459
SLC7A5	ENSG00000103257	193.828	0.899358	0.291118	3.08933	0.0020061	0.0410143
HMGA2	ENSG00000149948	227.618	0.586318	0.190392	3.07954	0.0020732	0.0422406
MFAP2	ENSG00000117122	24.0912	-1.44235	0.46867	-3.07754	0.00208715	0.0423103
PEX26	ENSG00000215193	44.3914	0.993386	0.322842	3.07701	0.00209089	0.0423103
DSTN	ENSG00000125868	976.344	-0.638072	0.20763	-3.07312	0.00211835	0.0424363
RBFOX2	ENSG00000100320	122.362	0.671486	0.218506	3.07308	0.00211859	0.0424363
ATP5O	ENSG00000241837	303.732	-0.842733	0.274096	-3.07459	0.00210789	0.0424363
PKN1	ENSG00000123143	74.2119	0.897698	0.292253	3.07165	0.00212877	0.0424966
DVL1	ENSG00000107404	50.9027	1.06241	0.34617	3.06904	0.00214746	0.0425366
SRSF3	ENSG00000112081	574.732	-0.73669	0.239951	-3.07017	0.0021394	0.0425366
ATP6AP2	ENSG00000182220	79.5719	-1.05613	0.34425	-3.06792	0.00215553	0.0425366
DYRK4	ENSG00000010219	54.8798	-0.892281	0.290894	-3.06738	0.00215947	0.0425366
CALM2	ENSG00000143933	1969.23	-1.03758	0.338698	-3.06345	0.00218801	0.0429559
RAB1A	ENSG00000138069	147.545	-0.814167	0.265924	-3.06166	0.00220117	0.0429975
DOK1	ENSG00000115325	46.5096	-1.07737	0.352118	-3.05967	0.0022158	0.0429975
BRI3	ENSG00000164713	721.978	0.816032	0.266745	3.05922	0.00221913	0.0429975
SMAD3	ENSG00000166949	92.4462	0.770244	0.251626	3.06107	0.00220547	0.0429975
CENPB	ENSG00000125817	112.507	0.69541	0.227472	3.05712	0.00223475	0.0431591
MGARP	ENSG00000137463	30.1618	-1.43265	0.469014	-3.0546	0.00225359	0.0433811
LMO7	ENSG00000136153	197.91	-0.739683	0.242231	-3.05363	0.00226088	0.0433811
NMT2	ENSG00000152465	111.361	0.820982	0.269286	3.04874	0.00229803	0.0436699
SREBF1	ENSG00000072310	43.0273	1.0436	0.342229	3.04941	0.00229288	0.0436699
VAT1	ENSG00000108828	62.0019	0.98722	0.323698	3.04982	0.00228978	0.0436699
RNF138	ENSG00000134758	26.9948	-1.10505	0.362712	-3.04664	0.00231417	0.0438361
PDHB	ENSG00000168291	104.597	-1.03772	0.341465	-3.03902	0.0023735	0.0448168
MTX1	ENSG00000173171	106.288	-0.742502	0.244644	-3.03503	0.00240514	0.0450758
RBM10	ENSG00000182872	59.3339	0.910056	0.299912	3.03442	0.00241002	0.0450758
GOLT1B	ENSG00000111711	74.2045	-0.927282	0.305451	-3.03578	0.00239913	0.0450758
KPNA2	ENSG00000182481	143.607	-0.914381	0.301535	-3.03242	0.00242602	0.0452323
PDE4DIP	ENSG00000178104	67.3068	0.872978	0.288549	3.0254	0.00248301	0.0461005
ATN1	ENSG00000111676	51.1122	0.977068	0.323021	3.02478	0.00248814	0.0461005
RPL7A	ENSG00000148303	4242.3	0.494835	0.163714	3.02256	0.00250649	0.046296
LOXL3	ENSG00000115318	65.4533	-1.43139	0.474866	-3.01431	0.00257564	0.0471359
ITGA2	ENSG00000164171	34.4178	1.19838	0.397567	3.01429	0.00257582	0.0471359
PSENEN	ENSG00000205155	118.36	-0.787303	0.2611	-3.01533	0.00256702	0.0471359
PSPH	ENSG00000146733	66.3721	-0.931022	0.309143	-3.01163	0.00259852	0.0472597
PRKAG2	ENSG00000106617	42.8782	1.05363	0.349818	3.01194	0.00259585	0.0472597
NOSIP	ENSG00000142546	136.88	-0.875644	0.290847	-3.01066	0.00260678	0.0472648
CYSTM1	ENSG00000120306	73.5593	-0.853755	0.284167	-3.00441	0.00266094	0.0479536
LGALS3BP	ENSG00000108679	46.9871	1.01464	0.337702	3.00455	0.00265975	0.0479536
TNPO2	ENSG00000105576	31.3753	1.26578	0.421704	3.00158	0.00268585	0.0482557
PDLIM7	ENSG00000196923	166.588	-0.641672	0.213851	-3.00055	0.00269493	0.0482726
PHC2	ENSG00000134686	78.3189	0.879128	0.293153	2.99887	0.00270982	0.0483402
CCNB1	ENSG00000134057	78.7095	-1.07676	0.359124	-2.99829	0.00271501	0.0483402
EXOSC7	ENSG00000075914	71.5395	-0.80978	0.270349	-2.99532	0.00274161	0.0485002
BTG1	ENSG00000133639	148.683	0.6361	0.212329	2.99583	0.00273702	0.0485002
KIF18B	ENSG00000186185	33.1835	1.04937	0.350426	2.99455	0.00274854	0.0485002
SEPT9	ENSG00000184640	134.702	0.694953	0.232247	2.9923	0.0027688	0.0487128
MRPL19	ENSG00000115364	80.702	-0.956211	0.320063	-2.98758	0.00281198	0.0493262
RERE	ENSG00000142599	71.8285	0.804211	0.269451	2.98463	0.0028392	0.0494593
PLAC8	ENSG00000145287	105.703	-0.949152	0.318316	-2.98179	0.00286565	0.0494593
SND1	ENSG00000197157	71.759	0.754753	0.252807	2.98549	0.00283121	0.0494593
DDX10	ENSG00000178105	48.8065	1.05183	0.352801	2.98137	0.00286962	0.0494593
LAMP1	ENSG00000185896	286.53	0.568901	0.19074	2.9826	0.00285813	0.0494593
NFE2L1	ENSG00000082641	76.709	0.875143	0.293322	2.98356	0.00284919	0.0494593
LRRC8A	ENSG00000136802	62.2385	1.05991	0.355977	2.97747	0.00290638	0.0498517
RABAC1	ENSG00000105404	190.805	-0.722623	0.242721	-2.97717	0.00290921	0.0498517
PLEC	ENSG00000178209	151.784	0.857037	0.288264	2.97309	0.00294816	0.0503737
KIAA0368	ENSG00000136813	47.8654	0.921357	0.310051	2.97163	0.00296227	0.0504693
PNO1	ENSG00000115946	60.2241	-1.05931	0.356791	-2.96899	0.00298783	0.0507589
EPHA2	ENSG00000142627	131.102	1.08463	0.365588	2.96682	0.003009	0.0509724
GNAI3	ENSG00000065135	63.3282	-0.827441	0.279534	-2.96007	0.00307566	0.051513
U2SURP	ENSG00000163714	106.165	-0.678601	0.2291	-2.96203	0.00305622	0.051513
IFI27L1	ENSG00000165948	40.5143	1.13165	0.382233	2.96064	0.00307002	0.051513
TRIM16L	ENSG00000108448	63.6399	0.950143	0.320903	2.96084	0.00306801	0.051513
ATRAID	ENSG00000138085	184.878	-0.639145	0.216231	-2.95584	0.00311814	0.0520774
TMEM59	ENSG00000116209	160.594	-0.783716	0.265422	-2.95272	0.00314991	0.0521671
VCP	ENSG00000165280	218.135	0.672626	0.227749	2.95337	0.00314323	0.0521671
DDX17	ENSG00000100201	105.636	0.694014	0.234944	2.95395	0.00313737	0.0521671
STK11	ENSG00000118046	39.6337	0.989441	0.335241	2.95143	0.00316303	0.0522385
RPL22L1	ENSG00000163584	382.013	-0.586095	0.198762	-2.94872	0.00319091	0.0525412
CDC25B	ENSG00000101224	113.469	0.709895	0.240811	2.94793	0.00319908	0.0525412
BTF3L4	ENSG00000134717	117.479	-0.707211	0.240333	-2.94263	0.00325433	0.053156
TMBIM1	ENSG00000135926	54.7627	0.853051	0.289895	2.94262	0.00325445	0.053156
LINC00839	ENSG00000185904	31.5542	-1.15275	0.392373	-2.9379	0.00330441	0.0538237
PSMA5	ENSG00000143106	303.698	-0.699869	0.238423	-2.93541	0.00333106	0.0540782
TOPORS-AS1	ENSG00000235453	28.4183	1.11943	0.381442	2.93474	0.00333827	0.0540782
WDR34	ENSG00000119333	345.96	0.564649	0.192636	2.93118	0.00337682	0.0544053
DGCR8	ENSG00000128191	37.4236	1.01983	0.347868	2.93166	0.0033716	0.0544053
MICAL3	ENSG00000243156	37.7046	1.03612	0.353604	2.93017	0.00338779	0.0544342
ACTR3	ENSG00000115091	146.034	-0.748177	0.255441	-2.92896	0.00340098	0.0544984
TMX2	ENSG00000213593	63.8538	-0.847597	0.289474	-2.92806	0.00341088	0.0545097
UCHL5	ENSG00000116750	52.4689	-1.053	0.359982	-2.92516	0.00344282	0.0546851
TXNL1	ENSG00000091164	133.707	-0.915463	0.313027	-2.92455	0.00344953	0.0546851
CCT8	ENSG00000156261	179.023	-1.0501	0.359045	-2.92471	0.00344773	0.0546851
DIMT1	ENSG00000086189	48.1679	-0.973009	0.332867	-2.92311	0.00346553	0.0547529
HNRNPA2B1	ENSG00000122566	1053.31	-0.59834	0.204735	-2.92251	0.00347227	0.0547529
TMEM156	ENSG00000121895	88.237	-0.77226	0.264899	-2.9153	0.0035535	0.0558851
TMEM9B	ENSG00000175348	38.5546	-0.948031	0.325688	-2.91085	0.00360444	0.0565364
LAMA4	ENSG00000112769	58.3651	2.62593	0.903612	2.90604	0.0036604	0.0572626
SNX2	ENSG00000205302	46.0562	-1.05308	0.363275	-2.89885	0.00374538	0.0582979
TWISTNB	ENSG00000105849	49.8887	-0.929844	0.320771	-2.89877	0.00374625	0.0582979
FGFRL1	ENSG00000127418	40.4762	1.10893	0.382918	2.896	0.00377958	0.0583571
SFRP1	ENSG00000104332	93.382	1.07967	0.372812	2.89602	0.00377929	0.0583571
RPS2	ENSG00000140988	36015.4	0.567704	0.195973	2.89685	0.00376932	0.0583571
NELFB	ENSG00000188986	82.3378	0.773177	0.267063	2.89511	0.00379022	0.0583693
MED4	ENSG00000136146	54.2666	-0.962406	0.332558	-2.89395	0.00380427	0.0584339
MTHFD2	ENSG00000065911	198.358	-0.697017	0.241114	-2.89083	0.00384231	0.0588658
LMF2	ENSG00000100258	78.3331	0.901587	0.311983	2.88986	0.00385411	0.0588944
NPM1	ENSG00000181163	2253.81	-0.979295	0.33897	-2.88903	0.00386431	0.0588984
ITFG1	ENSG00000129636	25.3137	-1.13275	0.392677	-2.88467	0.00391823	0.0595671
MTHFD1L	ENSG00000120254	87.1022	0.712931	0.247232	2.88365	0.00393097	0.059608
SELT	ENSG00000198843	206.378	-0.684074	0.237848	-2.8761	0.00402623	0.0607164
CTTN	ENSG00000085733	85.068	0.831107	0.289037	2.87543	0.00403479	0.0607164
NPC1	ENSG00000141458	21.2846	1.19846	0.416586	2.87686	0.00401648	0.0607164
CENPU	ENSG00000151725	93.3541	-0.794436	0.276544	-2.87273	0.00406946	0.0610832
SEP15	ENSG00000183291	138.845	-0.852953	0.297096	-2.87097	0.00409215	0.0612686
UHRF2	ENSG00000147854	39.6269	0.943272	0.328746	2.8693	0.00411381	0.0612834
THYN1	ENSG00000151500	83.6526	-0.977398	0.340609	-2.86956	0.00411044	0.0612834
PHF14	ENSG00000106443	96.7045	-0.756875	0.263973	-2.86724	0.00414067	0.0613751
GGA2	ENSG00000103365	36.7279	1.01927	0.355408	2.86789	0.00413222	0.0613751
TMED10	ENSG00000170348	87.1272	-0.809137	0.282655	-2.86263	0.00420146	0.0621208
NEAT1	ENSG00000245532	415.449	0.759872	0.265664	2.86028	0.00423273	0.0624274
CLUH	ENSG00000132361	29.1962	1.09112	0.38162	2.85917	0.00424748	0.0624896
COX11	ENSG00000166260	67.027	-0.773727	0.270925	-2.85587	0.00429193	0.0629873
SSB	ENSG00000138385	362.607	-0.874298	0.306722	-2.85046	0.00436559	0.0634401
IARS	ENSG00000196305	118.817	0.681279	0.23888	2.85197	0.00434493	0.0634401
ABR	ENSG00000159842	43.5883	0.879995	0.308546	2.85207	0.00434352	0.0634401
NAA20	ENSG00000173418	235.387	-0.79595	0.279207	-2.85075	0.00436161	0.0634401
ITGA3	ENSG00000005884	196.524	0.695272	0.244187	2.84729	0.00440932	0.063919
NFKBIE	ENSG00000146232	35.0485	1.28151	0.450363	2.8455	0.00443422	0.0639672
PDLIM1	ENSG00000107438	173.069	-1.16699	0.410059	-2.84591	0.00442842	0.0639672
LAMB3	ENSG00000196878	37.3264	1.63287	0.575378	2.8379	0.00454115	0.0653507
BCAP31	ENSG00000185825	316.186	-0.518051	0.182632	-2.83659	0.00455982	0.0654605
RNF115	ENSG00000121848	54.3469	-0.796332	0.281095	-2.83297	0.00461181	0.0658878
C1orf131	ENSG00000143633	30.2655	-1.01697	0.358918	-2.83342	0.00460527	0.0658878
AK2	ENSG00000004455	210.967	-0.650685	0.229832	-2.83113	0.00463833	0.0661073
AASDHPPT	ENSG00000149313	33.694	-1.14744	0.405679	-2.82844	0.0046776	0.0665072
PSMA4	ENSG00000041357	339.216	-0.94124	0.332899	-2.82741	0.00469268	0.0665619
SF3B4	ENSG00000143368	79.8669	-0.777195	0.275131	-2.82482	0.00473076	0.0667153
MRPL47	ENSG00000136522	98.1457	-0.842481	0.298292	-2.82435	0.00473767	0.0667153
RUSC2	ENSG00000198853	36.2825	1.05232	0.372784	2.82286	0.00475975	0.0667153
POLE	ENSG00000177084	45.1787	1.03933	0.368172	2.82296	0.00475828	0.0667153
TK1	ENSG00000167900	410.522	-0.532284	0.188441	-2.82468	0.00473277	0.0667153
DYNC1LI1	ENSG00000144635	46.0087	-0.928523	0.329355	-2.81922	0.00481406	0.0668334
LY6K	ENSG00000160886	56.2557	0.860434	0.305237	2.81891	0.00481875	0.0668334
CTSC	ENSG00000109861	330.501	-0.954686	0.338423	-2.82099	0.00478763	0.0668334
CD97	ENSG00000123146	34.8681	0.928927	0.329329	2.82066	0.00479243	0.0668334
BTG3	ENSG00000154640	113.949	-0.69246	0.245682	-2.81852	0.00482454	0.0668334
NSL1	ENSG00000117697	59.8812	-0.974061	0.345852	-2.81641	0.00485641	0.066962
RAP1B	ENSG00000127314	163.214	-0.560304	0.198943	-2.81641	0.0048564	0.066962
TSG101	ENSG00000074319	71.4596	-0.856938	0.304414	-2.81504	0.00487707	0.0670909
GAS2L1	ENSG00000185340	47.3328	0.963275	0.342596	2.8117	0.0049281	0.0676359
TOP2B	ENSG00000077097	35.6868	-1.00207	0.356892	-2.80776	0.00498869	0.0683094
CACYBP	ENSG00000116161	463.92	-0.925192	0.329722	-2.80598	0.00501639	0.0683728
HNRNPDL	ENSG00000152795	354.128	-0.638151	0.227375	-2.80661	0.00500665	0.0683728
SPATC1L	ENSG00000160284	21.7951	-1.27203	0.453758	-2.80333	0.0050578	0.0687792
DUSP4	ENSG00000120875	62.0946	1.12143	0.400224	2.80202	0.00507836	0.0689007
COMMD1	ENSG00000173163	104.363	-0.845574	0.301853	-2.80128	0.00509008	0.0689021
NDUFS5	ENSG00000168653	727.251	-0.544083	0.194358	-2.79938	0.00512008	0.0691503
CRBN	ENSG00000113851	38.9312	-0.897941	0.320998	-2.79734	0.00515258	0.069431
ETFA	ENSG00000140374	79.7837	-0.894676	0.32001	-2.79577	0.00517757	0.0696095
PGD	ENSG00000142657	107.343	0.619115	0.221662	2.79306	0.00522122	0.0700308
COL13A1	ENSG00000197467	29.9128	1.13756	0.407382	2.79236	0.00523253	0.0700308
MGAT4B	ENSG00000161013	113.924	0.698835	0.250357	2.79135	0.00524886	0.0700913
PRDX6	ENSG00000117592	329.578	-0.642478	0.230389	-2.78867	0.0052925	0.0702374
VBP1	ENSG00000155959	173.458	-0.811864	0.291012	-2.7898	0.00527405	0.0702374
HMGB1	ENSG00000189403	692.29	-0.525986	0.188627	-2.7885	0.00529535	0.0702374
TOR4A	ENSG00000198113	33.5671	1.06677	0.382887	2.78614	0.00533403	0.0705926
RBM8A	ENSG00000131795	451.215	-0.603708	0.216762	-2.78511	0.00535091	0.0706582
KCTD20	ENSG00000112078	93.2057	-0.691594	0.248514	-2.78292	0.00538723	0.0708932
LEPROTL1	ENSG00000104660	41.266	-0.962931	0.346059	-2.78256	0.00539322	0.0708932
SUGP2	ENSG00000064607	51.9332	0.893369	0.321139	2.78188	0.00540458	0.0708932
IGF2R	ENSG00000197081	50.7515	0.875309	0.314793	2.78059	0.00542607	0.0710181
EHBP1L1	ENSG00000173442	43.1924	0.887561	0.319314	2.77958	0.00544286	0.0710809
SLC25A25	ENSG00000148339	22.6365	1.12104	0.403673	2.77709	0.00548477	0.0714708
COL6A2	ENSG00000142173	69.4861	0.950535	0.342591	2.77455	0.00552785	0.0718742
PI4KA	ENSG00000241973	34.6016	1.011	0.364497	2.77368	0.00554255	0.0719077
KIAA1279	ENSG00000198954	53.4322	-1.00123	0.361165	-2.77222	0.00556756	0.0720743
TIMM17A	ENSG00000134375	254.44	-0.794572	0.287241	-2.76622	0.00567109	0.0732547
RTN4	ENSG00000115310	473.591	-0.683257	0.247286	-2.76302	0.00572697	0.0734961
SIGMAR1	ENSG00000147955	163.945	0.682712	0.247001	2.76401	0.00570957	0.0734961
CD9	ENSG00000010278	52.3071	-2.69659	0.975958	-2.76302	0.00572689	0.0734961
PCGF5	ENSG00000180628	110.042	-0.684914	0.248206	-2.75946	0.00578974	0.0739815
ECH1	ENSG00000104823	94.1843	-0.812145	0.294242	-2.76013	0.00577784	0.0739815
RBM7	ENSG00000076053	41.097	-1.11394	0.403887	-2.75806	0.00581458	0.074139
RPP40	ENSG00000124787	27.4894	-1.15549	0.419339	-2.7555	0.00586016	0.0744247
SEC16A	ENSG00000148396	37.9819	0.990481	0.359469	2.7554	0.00586209	0.0744247
SRP72	ENSG00000174780	92.2303	-0.702308	0.255021	-2.75392	0.00588866	0.0744432
UBE2M	ENSG00000130725	191.314	-0.561428	0.203819	-2.75454	0.00587751	0.0744432
SSSCA1	ENSG00000173465	186.933	-0.687564	0.250015	-2.75009	0.00595788	0.075158
TAGLN2	ENSG00000158710	1454.41	-0.846231	0.30871	-2.74119	0.00612172	0.0770609
DPYSL2	ENSG00000092964	50.6085	0.771414	0.281545	2.73993	0.00614513	0.0771917
FGFR1	ENSG00000077782	52.345	0.868611	0.317347	2.7371	0.00619838	0.077696
ABL1	ENSG00000097007	53.0841	1.08936	0.398139	2.73612	0.00621681	0.0777626
ABLIM1	ENSG00000099204	23.5276	1.06213	0.388663	2.73278	0.00628015	0.0783895
BRIX1	ENSG00000113460	170.555	-0.644808	0.236165	-2.73033	0.00632705	0.0784793
GGCT	ENSG00000006625	246.803	-0.691417	0.253184	-2.73088	0.00631646	0.0784793
C17orf51	ENSG00000212719	25.1233	1.04029	0.381011	2.73034	0.00632695	0.0784793
ADSS	ENSG00000035687	51.7686	-0.840856	0.308403	-2.72648	0.00640131	0.0788299
SYNJ2	ENSG00000078269	51.3364	0.797424	0.292471	2.72651	0.00640082	0.0788299
RCN2	ENSG00000117906	93.413	-0.716258	0.262615	-2.7274	0.00638349	0.0788299
COL1A1	ENSG00000108821	591.655	-0.699889	0.256735	-2.72611	0.0064085	0.0788299
ATAD3A	ENSG00000197785	78.976	0.67823	0.249025	2.72354	0.00645866	0.0792824
DTWD1	ENSG00000104047	38.9649	-0.973658	0.357644	-2.72242	0.00648051	0.0793863
PPA1	ENSG00000180817	348.547	-0.921617	0.338957	-2.71898	0.00654833	0.0800516
KIAA0319L	ENSG00000142687	32.281	0.946993	0.348407	2.71807	0.00656645	0.080108
GRSF1	ENSG00000132463	59.2783	-0.732523	0.269617	-2.7169	0.0065897	0.0802266
ANP32E	ENSG00000143401	100.422	-0.661362	0.24409	-2.70949	0.00673861	0.0813711
MRPS18C	ENSG00000163319	152.725	-0.713503	0.263214	-2.71073	0.00671351	0.0813711
ZNF146	ENSG00000167635	23.9274	-1.08188	0.399204	-2.7101	0.00672622	0.0813711
FOXRED2	ENSG00000100350	30.1848	0.973137	0.359036	2.71041	0.00671991	0.0813711
ANXA7	ENSG00000138279	130.303	-0.759448	0.280401	-2.70844	0.00676011	0.0814648
CMTM6	ENSG00000091317	70.0451	-0.666236	0.246071	-2.7075	0.00677927	0.08153
EIF2S2	ENSG00000125977	727.456	-0.587765	0.217239	-2.70562	0.00681778	0.0818271
ADD1	ENSG00000087274	62.813	0.793569	0.293595	2.70294	0.00687294	0.0820076
CFL1	ENSG00000172757	2847.06	-0.569863	0.210836	-2.70287	0.00687431	0.0820076
EIF3L	ENSG00000100129	268.265	0.643796	0.238085	2.70406	0.00684985	0.0820076
SRP19	ENSG00000153037	114.698	-0.714023	0.264266	-2.7019	0.00689436	0.0820466
TNRC6B	ENSG00000100354	38.1308	0.909588	0.336712	2.70138	0.00690525	0.0820466
CLNS1A	ENSG00000074201	99.886	-0.91204	0.337765	-2.70022	0.00692944	0.0821693
PDIA6	ENSG00000143870	280.753	-0.715516	0.265599	-2.69397	0.00706063	0.083432
HPS5	ENSG00000110756	32.3603	-0.89618	0.332681	-2.69381	0.00706407	0.083432
ZNF259	ENSG00000109917	55.9547	-0.782385	0.290585	-2.69245	0.00709298	0.0836069
PSMD6	ENSG00000163636	84.557	-1.04681	0.388978	-2.69117	0.00712013	0.0837604
EIF4E2	ENSG00000135930	135.758	-0.654267	0.243535	-2.68654	0.00721957	0.084538
BZW2	ENSG00000136261	62.6398	-0.787087	0.293021	-2.68611	0.00722901	0.084538
CPNE7	ENSG00000178773	47.1521	0.886462	0.330003	2.68622	0.00722652	0.084538
CAP1	ENSG00000131236	208.767	-0.540728	0.20141	-2.68471	0.00725924	0.0847245
PDLIM4	ENSG00000131435	149.806	-0.756963	0.282029	-2.68399	0.00727494	0.0847409
MAP3K11	ENSG00000173327	35.7244	0.9253	0.345034	2.68176	0.00732356	0.08495
CFL2	ENSG00000165410	88.108	-0.720131	0.268458	-2.68247	0.00730814	0.08495
MICALL1	ENSG00000100139	28.7267	1.17832	0.439474	2.6812	0.00733588	0.08495
HYI	ENSG00000178922	162.473	-0.720035	0.268639	-2.6803	0.00735554	0.0850117
USP22	ENSG00000124422	104.856	0.675512	0.252851	2.67158	0.00754956	0.0870537
A1BG	ENSG00000121410	26.0997	-1.03676	0.388147	-2.67104	0.00756159	0.0870537
TSEN15	ENSG00000198860	44.4979	-0.9	0.337337	-2.66796	0.00763143	0.087349
BATF3	ENSG00000123685	23.9212	-1.02286	0.38334	-2.66829	0.00762388	0.087349
CCDC47	ENSG00000108588	66.4089	-0.749296	0.28085	-2.66796	0.00763143	0.087349
FIBCD1	ENSG00000130720	46.6687	1.08497	0.406814	2.66699	0.00765346	0.0874324
OAT	ENSG00000065154	62.7252	-0.905113	0.33957	-2.66546	0.00768822	0.0876605
TMEM70	ENSG00000175606	73.1978	-0.834189	0.313063	-2.6646	0.00770789	0.0877161
KPNB1	ENSG00000108424	367.411	0.467894	0.175659	2.66364	0.00772991	0.0877982
TFPI	ENSG00000003436	74.9803	0.939263	0.352854	2.66191	0.00776994	0.0880841
DCAF13	ENSG00000164934	72.0052	-1.09718	0.412438	-2.66023	0.0078088	0.0883556
VEGFA	ENSG00000112715	50.0386	1.0436	0.392763	2.65706	0.0078825	0.0890197
KHSRP	ENSG00000088247	104.715	0.712416	0.268513	2.65319	0.00797343	0.0898754
PPIL1	ENSG00000137168	40.2161	-0.803072	0.302798	-2.65217	0.00799761	0.0898997
NAE1	ENSG00000159593	88.1414	-0.912797	0.344228	-2.65172	0.00800818	0.0898997
SPG7	ENSG00000197912	53.8802	0.729305	0.275087	2.65118	0.00802108	0.0898997
PSMD4	ENSG00000159352	247.854	-0.687542	0.259444	-2.65006	0.00804765	0.0900273
ASCC2	ENSG00000100325	47.3189	0.800547	0.302476	2.64665	0.00812939	0.0907705
SNRNP200	ENSG00000144028	70.3371	0.701928	0.265331	2.64548	0.00815761	0.0909144
HSPG2	ENSG00000142798	25.2767	1.04606	0.395819	2.64279	0.00822267	0.0911257
TTL	ENSG00000114999	55.011	0.813079	0.307629	2.64305	0.00821631	0.0911257
CASP6	ENSG00000138794	21.8809	-1.17329	0.443953	-2.64282	0.00822196	0.0911257
ARL6IP1	ENSG00000170540	71.3858	-0.76183	0.288673	-2.63908	0.00831318	0.0914449
IGF2BP1	ENSG00000159217	31.8301	0.938565	0.355636	2.63912	0.00831221	0.0914449
TSEN34	ENSG00000170892	149.38	-0.639454	0.242218	-2.64	0.00829071	0.0914449
PISD	ENSG00000241878	28.7867	0.921429	0.348989	2.64028	0.00828376	0.0914449
DZIP1	ENSG00000134874	32.8296	0.920101	0.34879	2.63798	0.0083401	0.0915712
BTF3	ENSG00000145741	1109.86	-0.636689	0.241652	-2.63473	0.00842035	0.0918212
PHF10	ENSG00000130024	25.3856	1.02773	0.389981	2.63533	0.00840546	0.0918212
SLC39A4	ENSG00000147804	21.8958	-1.03157	0.391322	-2.63612	0.00838591	0.0918212
TSFM	ENSG00000123297	81.2126	-0.711744	0.270157	-2.63455	0.00842481	0.0918212
MDH1	ENSG00000014641	227.571	-0.84756	0.321907	-2.63293	0.00846513	0.0919226
HSP90B1	ENSG00000166598	334.237	-0.714255	0.27123	-2.63339	0.00845366	0.0919226
CUEDC1	ENSG00000180891	28.597	0.930502	0.353515	2.63214	0.00848478	0.0919676
UBALD2	ENSG00000185262	72.4183	0.70832	0.269358	2.62966	0.00854703	0.0924732
PPP2R4	ENSG00000119383	95.1715	0.788917	0.300639	2.62413	0.008687	0.0938164
C1D	ENSG00000197223	43.8355	-0.788434	0.300704	-2.62196	0.00874249	0.0939026
MRPL3	ENSG00000114686	171.231	-0.656571	0.250394	-2.62215	0.00873775	0.0939026
HES1	ENSG00000114315	38.5957	-0.883478	0.336869	-2.62262	0.00872578	0.0939026
FLNC	ENSG00000128591	69.4731	0.785915	0.30013	2.61858	0.00882959	0.0943255
SDHD	ENSG00000204370	136.76	-0.806794	0.307972	-2.6197	0.00880074	0.0943255
ENO2	ENSG00000111674	59.2259	0.822047	0.313859	2.61916	0.00881468	0.0943255
S100A11	ENSG00000163191	550.704	-0.775839	0.296543	-2.61628	0.0088893	0.0944528
IER5	ENSG00000162783	46.4347	0.937547	0.358249	2.61702	0.00887001	0.0944528
PES1	ENSG00000100029	87.4409	0.774566	0.296051	2.61632	0.00888822	0.0944528
ISOC1	ENSG00000066583	39.0455	-0.934111	0.357227	-2.61489	0.0089255	0.0946677
TMED9	ENSG00000184840	520.109	-0.636463	0.243841	-2.61016	0.0090501	0.0956614
MYC	ENSG00000136997	51.3976	-0.778949	0.298436	-2.6101	0.00905145	0.0956614
ITPR3	ENSG00000096433	27.2101	1.12828	0.432665	2.60775	0.00911391	0.0958838
VAV2	ENSG00000160293	25.7057	1.0434	0.400156	2.60748	0.00912101	0.0958838
SAV1	ENSG00000151748	29.4471	1.06007	0.40652	2.60768	0.00911594	0.0958838
KLHL21	ENSG00000162413	39.1918	0.858022	0.329199	2.60639	0.00915024	0.0960208
ACTL6A	ENSG00000136518	66.1966	-0.733168	0.281704	-2.60262	0.00925143	0.0967442
HLA-B	ENSG00000234745	155.661	0.626222	0.240614	2.60261	0.00925181	0.0967442
UBAC1	ENSG00000130560	85.7903	0.623027	0.239499	2.60137	0.00928514	0.0968313
SPRYD7	ENSG00000123178	30.154	-1.01714	0.391133	-2.60049	0.00930913	0.0968313
TELO2	ENSG00000100726	42.2241	0.908406	0.349308	2.60059	0.00930644	0.0968313
GNL3	ENSG00000163938	118.169	-0.60267	0.231889	-2.59896	0.00935055	0.0970918
TBC1D13	ENSG00000107021	22.6391	1.07503	0.414208	2.59538	0.00944855	0.0977836
SEPW1	ENSG00000178980	122.41	-0.648938	0.250041	-2.59532	0.00945016	0.0977836
PRSS23	ENSG00000150687	606.167	-0.875764	0.337606	-2.59404	0.00948555	0.0979788
SKP1	ENSG00000113558	432.041	-0.80466	0.310699	-2.58984	0.00960212	0.0988755
SOD1	ENSG00000142168	647.784	-0.622953	0.24055	-2.58971	0.00960571	0.0988755
PLXNA1	ENSG00000114554	39.8339	1.17466	0.454101	2.58677	0.00968789	0.0994969
TACC3	ENSG00000013810	70.7796	0.804853	0.311192	2.58636	0.00969964	0.0994969
SCP2	ENSG00000116171	142.165	-0.918168	0.355253	-2.58455	0.00975071	0.0996758
CRKL	ENSG00000099942	28.878	1.01315	0.391958	2.58484	0.00974232	0.0996758
WHSC1	ENSG00000109685	110.184	0.619945	0.239975	2.58337	0.009784	0.099844
CCNE2	ENSG00000175305	27.3884	-1.1375	0.440499	-2.58229	0.00981459	0.0998576
ARL2	ENSG00000213465	284.741	-0.551126	0.213438	-2.58214	0.00981902	0.0998576
LRRC45	ENSG00000169683	31.052	0.950923	0.36857	2.58003	0.0098791	0.100297
FHOD1	ENSG00000135723	53.734	0.738429	0.286294	2.57927	0.00990107	0.100348
EDN1	ENSG00000078401	69.8238	-1.8776	0.730231	-2.57123	0.0101337	0.10253
ALDH3A2	ENSG00000072210	34.4336	0.855698	0.33311	2.56881	0.0102047	0.103073
PLEKHM2	ENSG00000116786	42.5642	0.837159	0.326003	2.56795	0.0102301	0.103154
SNRPB2	ENSG00000125870	98.0005	-0.809616	0.315366	-2.56722	0.0102517	0.103196
PSMF1	ENSG00000125818	73.7807	-0.689278	0.268856	-2.56374	0.0103551	0.10406
USP5	ENSG00000111667	38.6125	0.833662	0.325417	2.56182	0.0104124	0.104459
SEC61A1	ENSG00000058262	218.611	0.603547	0.236032	2.55706	0.0105562	0.10519
ACYP1	ENSG00000119640	76.5123	0.857839	0.335462	2.55719	0.0105523	0.10519
GCSH	ENSG00000140905	402.579	-0.493378	0.19286	-2.55821	0.0105211	0.10519
MRPL39	ENSG00000154719	39.9228	-1.00957	0.394784	-2.55728	0.0105495	0.10519
ZFYVE27	ENSG00000155256	22.6764	1.05507	0.41348	2.55168	0.0107205	0.106648
SPCS1	ENSG00000114902	290.919	-0.855324	0.335348	-2.55055	0.0107552	0.106813
SUCLA2	ENSG00000136143	23.9803	-1.27835	0.501964	-2.5467	0.0108748	0.10782
RNF121	ENSG00000137522	32.6576	-0.873323	0.34311	-2.54532	0.0109179	0.108067
C1QBP	ENSG00000108561	645.571	-0.556298	0.218725	-2.54336	0.0109791	0.108492
EBNA1BP2	ENSG00000117395	541.035	-0.483403	0.190154	-2.54216	0.0110169	0.108588
REEP5	ENSG00000129625	150.02	-0.900894	0.354433	-2.54179	0.0110286	0.108588
SFI1	ENSG00000198089	25.5128	1.02688	0.404074	2.54131	0.0110438	0.108588
TXNDC9	ENSG00000115514	74.5128	-0.734739	0.289192	-2.54067	0.0110642	0.108608
CNPY3	ENSG00000137161	82.5886	0.609656	0.240162	2.53852	0.0111321	0.109095
RPLP1	ENSG00000137818	8090.4	0.455549	0.17952	2.5376	0.0111617	0.109204
CDKN1A	ENSG00000124762	108.342	1.94121	0.765314	2.53649	0.011197	0.109369
SSFA2	ENSG00000138434	74.4866	0.738296	0.2913	2.53449	0.0112612	0.109798
HMGN1	ENSG00000205581	676.744	-0.565239	0.223065	-2.53397	0.0112779	0.109798
LTBR	ENSG00000111321	64.3257	0.766497	0.302604	2.533	0.011309	0.10992
FNTA	ENSG00000168522	61.7016	-0.744224	0.294026	-2.53115	0.011369	0.110322
ADH5	ENSG00000197894	104.352	-0.665878	0.263339	-2.5286	0.0114519	0.110565
TAF7	ENSG00000178913	28.6133	-0.941118	0.372248	-2.5282	0.0114649	0.110565
CEP78	ENSG00000148019	53.3848	0.768491	0.303981	2.52809	0.0114687	0.110565
MMP24-AS1	ENSG00000126005	218.872	0.487741	0.192833	2.52934	0.0114276	0.110565
SNX3	ENSG00000112335	441.561	-0.504232	0.199566	-2.52664	0.011516	0.110842
RUVBL2	ENSG00000183207	117.359	-0.623618	0.246889	-2.52591	0.0115399	0.110892
PAPSS1	ENSG00000138801	23.245	-1.0803	0.428108	-2.52344	0.0116213	0.110954
GTF2H2	ENSG00000145736	27.0847	-1.02101	0.404579	-2.52363	0.011615	0.110954
PSMA3	ENSG00000100567	153.911	-0.749779	0.29701	-2.52442	0.0115889	0.110954
IL11	ENSG00000095752	122.505	-1.03871	0.411586	-2.52367	0.0116137	0.110954
TPRKB	ENSG00000144034	106.72	-0.731164	0.289951	-2.52168	0.0116796	0.111153
COQ4	ENSG00000167113	159.145	0.541217	0.214592	2.52208	0.0116663	0.111153
C7orf55	ENSG00000164898	72.6664	0.670215	0.266258	2.51716	0.0118304	0.112408
TCEAL8	ENSG00000180964	120.384	-0.875285	0.348254	-2.51335	0.011959	0.113267
MTHFS	ENSG00000136371	57.3403	-0.826475	0.328779	-2.51377	0.0119448	0.113267
SDHB	ENSG00000117118	208.227	-0.596035	0.237425	-2.51042	0.0120587	0.1136
PPT1	ENSG00000131238	65.5103	-0.676607	0.269678	-2.50895	0.0121091	0.1136
DOCK10	ENSG00000135905	25.4661	0.999485	0.397979	2.5114	0.0120252	0.1136
RAPGEF1	ENSG00000107263	37.3355	0.821275	0.327159	2.51032	0.0120621	0.1136
C9orf142	ENSG00000148362	204.681	0.576853	0.22987	2.50947	0.0120911	0.1136
FOSL1	ENSG00000175592	313.346	0.831517	0.331292	2.50992	0.0120759	0.1136
GJC1	ENSG00000182963	29.0905	0.971996	0.38763	2.50753	0.0121578	0.113876
TNFRSF10B	ENSG00000120889	49.3312	0.906413	0.361686	2.50608	0.0122078	0.114164
HIPK2	ENSG00000064393	47.6608	0.761761	0.304277	2.50351	0.0122967	0.114815
ADI1	ENSG00000182551	284.011	-0.624729	0.249772	-2.5012	0.0123775	0.114957
RAB5A	ENSG00000144566	52.0638	-0.868932	0.347532	-2.5003	0.012409	0.114957
CCDC80	ENSG00000091986	207.125	-0.690596	0.276185	-2.50048	0.0124025	0.114957
TMEM179B	ENSG00000185475	101.515	-0.571526	0.228487	-2.50135	0.012372	0.114957
INTS6	ENSG00000102786	28.2599	0.929966	0.371818	2.50113	0.0123798	0.114957
MYCBP	ENSG00000214114	40.9596	-0.802533	0.321091	-2.49939	0.0124406	0.11507
SDHC	ENSG00000143252	173.786	-0.567153	0.227067	-2.49773	0.012499	0.115251
CHORDC1	ENSG00000110172	65.2684	-0.747525	0.299236	-2.49811	0.0124857	0.115251
RNF181	ENSG00000168894	175.724	-0.678658	0.272534	-2.49018	0.012768	0.117195
JAGN1	ENSG00000171135	77.2036	-0.652145	0.261812	-2.49089	0.0127423	0.117195
MAP1A	ENSG00000166963	24.8445	0.981474	0.394143	2.49014	0.0127691	0.117195
MRPS35	ENSG00000061794	86.9256	-0.756328	0.303835	-2.48927	0.0128007	0.117303
DBNL	ENSG00000136279	87.3836	-0.722096	0.290619	-2.48468	0.0129667	0.11852
PCBP2	ENSG00000197111	352.465	0.47906	0.19282	2.4845	0.0129734	0.11852
MINPP1	ENSG00000107789	24.638	-0.988324	0.398281	-2.48147	0.0130841	0.119347
TYMP	ENSG00000025708	40.1992	0.940233	0.379748	2.47594	0.0132886	0.121027
QPCT	ENSG00000115828	24.1722	-1.09149	0.441077	-2.47459	0.0133388	0.12103
EPB41L2	ENSG00000079819	53.3366	0.710394	0.28711	2.47429	0.0133502	0.12103
CCAR2	ENSG00000158941	31.6221	0.851003	0.343868	2.47479	0.0133313	0.12103
MT-ND1	ENSG00000198888	1880.56	0.627533	0.253894	2.47164	0.0134496	0.121745
CCNC	ENSG00000112237	65.864	-0.764106	0.309508	-2.46878	0.0135576	0.122349
RRP7A	ENSG00000189306	255.116	0.504606	0.204356	2.46925	0.0135397	0.122349
AP1M1	ENSG00000072958	66.3695	0.661784	0.26816	2.46787	0.0135918	0.122471
PPP2CA	ENSG00000113575	86.6634	-0.799917	0.324437	-2.46555	0.0136803	0.122844
C16orf80	ENSG00000070761	130.254	-0.548254	0.222401	-2.46516	0.0136954	0.122844
XRCC6	ENSG00000196419	405.705	0.512211	0.207711	2.46598	0.0136639	0.122844
MT2A	ENSG00000125148	4903.32	-0.582614	0.23652	-2.46327	0.0137675	0.123119
PSMC3IP	ENSG00000131470	159.812	0.524938	0.213069	2.4637	0.0137511	0.123119
SETD8	ENSG00000183955	52.0247	0.807941	0.328073	2.46268	0.0137901	0.123135
TERF1	ENSG00000147601	43.3879	-0.864835	0.351648	-2.45938	0.0139178	0.124089
GAR1	ENSG00000109534	57.2998	-0.683444	0.278089	-2.45764	0.0139851	0.124129
TMEM167A	ENSG00000174695	170.949	-0.607626	0.247197	-2.45806	0.013969	0.124129
XPO5	ENSG00000124571	22.2152	1.00518	0.408916	2.45815	0.0139655	0.124129
TRMU	ENSG00000100416	72.7405	0.609433	0.248322	2.4542	0.0141198	0.125137
CNN3	ENSG00000117519	272.539	-0.70743	0.289038	-2.44753	0.0143839	0.126344
GPR107	ENSG00000148358	32.5068	0.857564	0.350349	2.44774	0.0143754	0.126344
HCFC1R1	ENSG00000103145	295.764	0.456926	0.186533	2.44957	0.0143028	0.126344
DPM1	ENSG00000000419	117.512	-0.707383	0.288893	-2.4486	0.0143413	0.126344
LENG1	ENSG00000105617	43.0439	-0.774802	0.31639	-2.44888	0.0143299	0.126344
SLC25A1	ENSG00000100075	116.991	0.675554	0.275973	2.4479	0.0143692	0.126344
MRPL17	ENSG00000158042	312.27	-0.598072	0.244434	-2.44676	0.0144147	0.126427
RPL12	ENSG00000197958	11197.9	0.557911	0.228467	2.44198	0.0146071	0.127698
POLR2C	ENSG00000102978	131.589	-0.623846	0.255512	-2.44155	0.0146242	0.127698
EIF4A1	ENSG00000161960	1511.13	-0.588113	0.240788	-2.44246	0.0145877	0.127698
MRPS21	ENSG00000187145	226.413	-0.623302	0.255682	-2.4378	0.0147769	0.128088
DCK	ENSG00000156136	41.2903	-0.758249	0.310799	-2.43968	0.0147003	0.128088
PRPS1	ENSG00000147224	102.757	-0.547337	0.224502	-2.43801	0.0147685	0.128088
EHD4	ENSG00000103966	39.0109	0.79931	0.327673	2.43935	0.0147136	0.128088
MYL9	ENSG00000101335	428.942	-0.622467	0.255309	-2.43809	0.0147651	0.128088
INF2	ENSG00000203485	55.8802	0.753388	0.309207	2.43652	0.0148295	0.128356
MPHOSPH10	ENSG00000124383	41.4806	-0.868035	0.356604	-2.43417	0.0149261	0.128464
C9orf114	ENSG00000198917	42.6658	0.895086	0.367507	2.43556	0.0148688	0.128464
NSMCE4A	ENSG00000107672	75.2419	-0.690263	0.283595	-2.43398	0.014934	0.128464
MRPL21	ENSG00000197345	198.851	-0.611828	0.251411	-2.43358	0.0149503	0.128464
EI24	ENSG00000149547	179.735	-0.523086	0.214913	-2.43394	0.0149354	0.128464
PIM3	ENSG00000198355	53.5296	0.886516	0.364514	2.43204	0.0150138	0.128824
BICD2	ENSG00000185963	31.644	0.871692	0.358801	2.42946	0.0151215	0.12956
FTH1	ENSG00000167996	12663.9	0.570164	0.235004	2.42619	0.0152582	0.130537
PVRL2	ENSG00000130202	33.7371	-0.84211	0.347164	-2.42568	0.0152796	0.130537
RUVBL1	ENSG00000175792	98.864	-0.592979	0.244681	-2.42348	0.0153725	0.131141
RAD54L	ENSG00000085999	28.825	0.87827	0.363546	2.41584	0.0156988	0.131249
TXNDC12	ENSG00000117862	116.177	-0.701502	0.290585	-2.4141	0.015774	0.131249
RAP1A	ENSG00000116473	74.0615	-0.604083	0.250392	-2.41254	0.0158416	0.131249
DGUOK	ENSG00000114956	222.353	-0.526643	0.217739	-2.41869	0.0155764	0.131249
COL5A2	ENSG00000204262	32.5456	-0.8872	0.367753	-2.41249	0.0158441	0.131249
PBRM1	ENSG00000163939	37.5026	-0.778855	0.322225	-2.41712	0.015644	0.131249
COL8A1	ENSG00000144810	34.1721	-0.844929	0.350045	-2.41377	0.0157884	0.131249
FHL1	ENSG00000022267	84.8531	-0.937641	0.388588	-2.41294	0.0158243	0.131249
MFSD3	ENSG00000167700	38.8513	0.824853	0.341239	2.41723	0.0156391	0.131249
TLN1	ENSG00000137076	250.653	0.582917	0.241787	2.41087	0.0159145	0.131249
HK1	ENSG00000156515	63.4577	0.709217	0.294242	2.41032	0.0159385	0.131249
EIF3M	ENSG00000149100	170.853	-0.90164	0.372769	-2.41877	0.0155733	0.131249
CDK2AP2	ENSG00000167797	85.8254	-0.697201	0.288716	-2.41483	0.0157423	0.131249
NAB2	ENSG00000166886	28.3026	1.46812	0.60845	2.41289	0.0158266	0.131249
GTF2F2	ENSG00000188342	49.4381	-0.84875	0.350995	-2.41813	0.0156006	0.131249
NFATC2IP	ENSG00000176953	71.1308	0.649909	0.2693	2.41333	0.0158077	0.131249
MT1E	ENSG00000169715	295.317	-0.769452	0.31921	-2.41049	0.0159312	0.131249
ZDHHC7	ENSG00000153786	52.5512	0.726604	0.300596	2.41721	0.0156401	0.131249
ANKRD11	ENSG00000167522	283.274	0.54492	0.225108	2.42071	0.0154904	0.131249
TAX1BP3	ENSG00000213977	223.433	-0.518035	0.214486	-2.41524	0.0157248	0.131249
KIF1C	ENSG00000129250	67.8989	0.658101	0.272943	2.41113	0.0159033	0.131249
CSNK1G2	ENSG00000133275	52.6807	0.680464	0.282123	2.41194	0.0158679	0.131249
EIF3K	ENSG00000178982	401.581	-0.619342	0.255747	-2.4217	0.0154482	0.131249
TXN2	ENSG00000100348	354.545	0.476983	0.197441	2.41583	0.0156995	0.131249
POLR3H	ENSG00000100413	150.226	0.563745	0.233411	2.41524	0.0157247	0.131249
C5orf15	ENSG00000113583	40.2264	-0.926883	0.384699	-2.40937	0.01598	0.131408
DCTPP1	ENSG00000179958	308	-0.495805	0.205982	-2.40703	0.0160826	0.132069
MTOR	ENSG00000198793	32.7525	0.879602	0.366247	2.40167	0.0163206	0.133261
PLK3	ENSG00000173846	23.1062	1.06259	0.442407	2.40184	0.0163129	0.133261
MRPL42	ENSG00000198015	76.1826	-0.602887	0.251127	-2.40072	0.0163626	0.133261
GINS2	ENSG00000131153	274.906	-0.44777	0.186445	-2.40161	0.016323	0.133261
RAE1	ENSG00000101146	47.0563	-0.809701	0.3372	-2.40125	0.0163392	0.133261
U2AF1	ENSG00000160201	389.173	-0.529448	0.220536	-2.40073	0.0163626	0.133261
AP1M2	ENSG00000129354	21.8026	1.05094	0.438093	2.39889	0.0164449	0.133748
RSL1D1	ENSG00000171490	277.743	-0.552716	0.230465	-2.39827	0.0164728	0.133791
MNS1	ENSG00000138587	40.8157	-0.887463	0.370199	-2.39726	0.0165183	0.133794
MYL12B	ENSG00000118680	673.032	-0.637952	0.266109	-2.39733	0.016515	0.133794
MPLKIP	ENSG00000168303	218.692	-0.691935	0.288872	-2.3953	0.0166068	0.134327
CCDC90B	ENSG00000137500	88.3503	-0.713259	0.298129	-2.39245	0.0167363	0.13519
TMEM165	ENSG00000134851	93.967	-0.588526	0.246252	-2.38993	0.0168515	0.13575
MPST	ENSG00000128309	155.751	0.532477	0.222769	2.39026	0.0168365	0.13575
PRKAR1A	ENSG00000108946	66.8429	-0.615107	0.257429	-2.38943	0.0168747	0.135754
AP1S2	ENSG00000182287	86.196	-0.747696	0.312984	-2.38892	0.0168978	0.135755
EEF1E1	ENSG00000124802	199.16	-0.623387	0.261272	-2.38597	0.0170343	0.136603
TCF19	ENSG00000137310	93.9312	0.680424	0.285217	2.38564	0.0170495	0.136603
SEC61G	ENSG00000132432	209.927	-0.619651	0.259886	-2.38432	0.0171108	0.136725
MGST1	ENSG00000008394	175.633	0.866559	0.363402	2.38457	0.0170989	0.136725
UBE2L6	ENSG00000156587	40.4937	-0.794674	0.333455	-2.38315	0.017165	0.136973
BCAS2	ENSG00000116752	128.474	-0.817892	0.343429	-2.38155	0.0172402	0.137377
LSM4	ENSG00000130520	1293.12	0.500619	0.210249	2.38108	0.0172619	0.137377
ALKBH5	ENSG00000091542	55.2637	0.671783	0.282291	2.37975	0.0173243	0.137689
VPS13A	ENSG00000197969	38.4822	0.780174	0.328008	2.37852	0.0173824	0.137965
RICTOR	ENSG00000164327	28.1214	0.887856	0.373389	2.37783	0.0174149	0.137968
HERC2	ENSG00000128731	41.9899	0.859476	0.3615	2.37753	0.0174293	0.137968
ACTB	ENSG00000075624	3688.5	-0.525394	0.221212	-2.37507	0.0175457	0.138705
DDOST	ENSG00000244038	96.4007	-0.576505	0.243086	-2.37161	0.0177109	0.139268
FIP1L1	ENSG00000145216	36.4669	-0.898698	0.37892	-2.37174	0.0177047	0.139268
PKD1	ENSG00000008710	21.4298	0.999354	0.42132	2.37196	0.0176941	0.139268
MAP2K2	ENSG00000126934	234.454	0.498008	0.209905	2.37254	0.0176662	0.139268
SNRPB	ENSG00000125835	1232.95	-0.508581	0.214677	-2.36905	0.0178338	0.140049
GDF6	ENSG00000156466	22.0993	-0.947434	0.400073	-2.36815	0.0178773	0.140204
CYR61	ENSG00000142871	1003.92	-0.530472	0.224082	-2.36731	0.0179178	0.140336
RASA3	ENSG00000185989	25.3207	1.0732	0.453541	2.36626	0.0179689	0.140366
CDC42EP1	ENSG00000128283	172.688	0.657213	0.277688	2.36673	0.0179459	0.140366
SCARB1	ENSG00000073060	23.444	1.13252	0.479223	2.36325	0.0181155	0.141325
ITM2B	ENSG00000136156	107.06	-0.932901	0.395157	-2.36083	0.0182339	0.142061
SEPT11	ENSG00000138758	102.937	-0.559296	0.237037	-2.35953	0.0182979	0.142186
GPANK1	ENSG00000204438	75.6833	0.635705	0.269371	2.35996	0.0182771	0.142186
ANKH	ENSG00000154122	24.2962	1.11301	0.471992	2.35812	0.018368	0.142405
CBR3	ENSG00000159231	84.9185	-0.622415	0.26396	-2.35799	0.018374	0.142405
GATAD1	ENSG00000157259	23.0666	0.907837	0.385224	2.35664	0.0184409	0.142737
DDIT4	ENSG00000168209	87.8444	1.85474	0.787528	2.35515	0.0185154	0.143126
SPATS2	ENSG00000123352	95.7297	0.660098	0.280414	2.35401	0.0185719	0.143376
RIOK3	ENSG00000101782	48.6773	0.700954	0.29798	2.35235	0.0186551	0.143458
ATP5SL	ENSG00000105341	40.9903	-0.753616	0.320252	-2.3532	0.0186127	0.143458
CBY1	ENSG00000100211	79.5114	0.695494	0.295648	2.35244	0.0186507	0.143458
RNF11	ENSG00000123091	47.5436	-0.667941	0.284433	-2.34833	0.018858	0.144589
DDX42	ENSG00000198231	62.0741	0.675246	0.287555	2.34823	0.0188629	0.144589
JOSD1	ENSG00000100221	46.199	0.735118	0.313085	2.34798	0.0188753	0.144589
PKN3	ENSG00000160447	26.567	0.862093	0.367549	2.34552	0.0190007	0.145362
DLG1	ENSG00000075711	49.9236	-0.778691	0.332134	-2.34451	0.0190523	0.145383
NUPR1	ENSG00000176046	78.2738	-1.08395	0.462387	-2.34425	0.0190653	0.145383
CHD3	ENSG00000170004	90.6271	0.639027	0.27262	2.34402	0.0190771	0.145383
YIF1A	ENSG00000174851	225.136	-0.554041	0.236413	-2.34353	0.0191023	0.145388
GNL1	ENSG00000204590	69.4846	0.650535	0.277914	2.34078	0.0192436	0.145791
NUDT2	ENSG00000164978	74.3035	0.6261	0.267497	2.34059	0.0192535	0.145791
COL4A1	ENSG00000187498	176.294	-0.98549	0.420893	-2.34143	0.0192101	0.145791
DGCR6L	ENSG00000128185	169.532	0.637797	0.272383	2.34154	0.0192042	0.145791
CIAPIN1	ENSG00000005194	71.0127	-0.750875	0.321069	-2.33867	0.0193526	0.146354
TCF25	ENSG00000141002	159.773	0.52894	0.226264	2.33771	0.0194021	0.146541
UBE2V2	ENSG00000169139	192.535	-0.61808	0.264594	-2.33596	0.0194936	0.147045
MRPL22	ENSG00000082515	205.739	-0.579254	0.248141	-2.33437	0.0195764	0.147295
PPP1R35	ENSG00000160813	65.9502	0.598055	0.256186	2.33445	0.0195721	0.147295
RRAS2	ENSG00000133818	90.5104	-0.856681	0.367261	-2.33262	0.019668	0.147691
SAAL1	ENSG00000166788	31.7177	-1.1592	0.497095	-2.33194	0.0197038	0.147691
PSMA7	ENSG00000101182	1877.84	-0.555946	0.238402	-2.33197	0.0197021	0.147691
PAIP2	ENSG00000120727	118.026	-0.691897	0.296819	-2.33104	0.0197513	0.14786
SNX7	ENSG00000162627	76.0462	-0.66422	0.28559	-2.32579	0.02003	0.148539
ACBD6	ENSG00000135847	67.5186	-0.595408	0.255976	-2.32603	0.0200169	0.148539
ZMIZ2	ENSG00000122515	27.5839	1.04912	0.450531	2.32862	0.019879	0.148539
ABCF2	ENSG00000033050	65.5745	0.647173	0.278267	2.32573	0.0200331	0.148539
CIZ1	ENSG00000148337	64.8058	0.725822	0.3121	2.3256	0.0200396	0.148539
BANF1	ENSG00000175334	475.286	-0.534803	0.229798	-2.32728	0.0199505	0.148539
SLC7A1	ENSG00000139514	51.1788	0.79498	0.341845	2.32555	0.0200424	0.148539
ETHE1	ENSG00000105755	93.7952	-0.849613	0.364968	-2.32791	0.0199168	0.148539
RP11-395G23.3	ENSG00000254615	30.8989	0.838194	0.360557	2.32472	0.0200869	0.148683
EIF2S1	ENSG00000134001	99.8929	-0.673713	0.289958	-2.32349	0.020153	0.14873
MAVS	ENSG00000088888	21.3285	0.989191	0.425788	2.3232	0.0201685	0.14873
LDLR	ENSG00000130164	70.5657	0.661019	0.284511	2.32335	0.0201602	0.14873
COMMD9	ENSG00000110442	89.3303	-0.593451	0.255618	-2.32163	0.0202528	0.148796
CHD4	ENSG00000111642	140.401	0.482001	0.207551	2.32232	0.0202156	0.148796
CNIH1	ENSG00000100528	43.4044	-0.74142	0.319339	-2.32173	0.0202473	0.148796
VPS72	ENSG00000163159	43.9474	-0.741316	0.319721	-2.31863	0.0204148	0.14888
C6orf1	ENSG00000186577	123.914	0.618002	0.266525	2.31874	0.0204091	0.14888
SNX9	ENSG00000130340	47.1284	0.707946	0.30529	2.31893	0.0203987	0.14888
MORC4	ENSG00000133131	76.4897	0.700744	0.302214	2.3187	0.0204111	0.14888
UQCRC2	ENSG00000140740	88.3669	-0.650089	0.280251	-2.31966	0.0203591	0.14888
ICT1	ENSG00000167862	102.805	-0.58441	0.252003	-2.31906	0.020392	0.14888
FSD1	ENSG00000105255	22.8458	-1.07081	0.462011	-2.31772	0.0204644	0.149058
MOB4	ENSG00000115540	29.9554	-0.811611	0.350284	-2.31701	0.0205031	0.149157
BOLA3	ENSG00000163170	161.044	-0.551185	0.238254	-2.31344	0.0206987	0.149946
KIAA1143	ENSG00000163807	44.6753	-0.716777	0.309967	-2.31243	0.0207542	0.149946
RSRC1	ENSG00000174891	79.4256	-0.6319	0.27317	-2.31321	0.0207111	0.149946
FAM20C	ENSG00000177706	70.1577	0.861038	0.372021	2.31449	0.020641	0.149946
PRKRIR	ENSG00000137492	24.9421	-0.983074	0.425157	-2.31226	0.0207633	0.149946
UBE2N	ENSG00000177889	184.631	-0.493939	0.213586	-2.31261	0.0207443	0.149946
C1GALT1C1	ENSG00000171155	37.3082	-0.979794	0.424318	-2.3091	0.0209378	0.150473
CTSB	ENSG00000164733	218.032	0.475817	0.206059	2.30914	0.020936	0.150473
RP11-660L16.2	ENSG00000254682	27.0734	0.875599	0.379191	2.30912	0.0209367	0.150473
NEDD1	ENSG00000139350	23.5647	-0.902425	0.390776	-2.30931	0.0209263	0.150473
TMEM123	ENSG00000152558	136.965	-0.623757	0.270278	-2.30784	0.0210082	0.150796
MAPK12	ENSG00000188130	44.8297	0.710332	0.30796	2.30658	0.0210784	0.151117
POLR2G	ENSG00000168002	172.896	-0.700848	0.304122	-2.3045	0.0211948	0.151768
SGTA	ENSG00000104969	76.856	0.642313	0.278872	2.30326	0.0212643	0.152082
KIAA2013	ENSG00000116685	46.9956	0.699091	0.304063	2.29916	0.0214957	0.153035
ETV5	ENSG00000244405	50.1253	0.723372	0.314652	2.29896	0.0215072	0.153035
SCFD1	ENSG00000092108	44.8223	-0.737697	0.320793	-2.2996	0.0214708	0.153035
ATP6V1D	ENSG00000100554	117.677	-0.530486	0.23083	-2.29817	0.0215524	0.153035
CCNDBP1	ENSG00000166946	27.7341	-0.932045	0.405508	-2.29846	0.0215354	0.153035
TRIM25	ENSG00000121060	39.4794	0.809957	0.352365	2.29863	0.0215259	0.153035
GABPB1	ENSG00000104064	21.3079	-1.04484	0.45492	-2.29676	0.0216322	0.153418
RDH14	ENSG00000240857	42.4719	-0.75366	0.328639	-2.29328	0.021832	0.154465
MME	ENSG00000196549	28.3156	0.922856	0.402356	2.29363	0.0218119	0.154465
NUDCD1	ENSG00000120526	26.528	-0.989266	0.431477	-2.29274	0.0218629	0.1545
EIF4B	ENSG00000063046	136.192	0.560002	0.244302	2.29225	0.021891	0.154514
DESI1	ENSG00000100418	171.559	0.476534	0.208275	2.288	0.0221374	0.156067
NDUFS3	ENSG00000213619	179.67	-0.589507	0.257739	-2.28723	0.0221827	0.156201
PCMT1	ENSG00000120265	133.833	-0.706622	0.309051	-2.28643	0.0222292	0.156342
UBE2A	ENSG00000077721	183.663	-0.527766	0.231043	-2.28428	0.0223553	0.156487
NSMF	ENSG00000165802	33.5469	0.763911	0.334309	2.28505	0.0223101	0.156487
HDAC7	ENSG00000061273	35.8756	0.868734	0.380295	2.28437	0.0223498	0.156487
NBR1	ENSG00000188554	37.284	0.752159	0.329135	2.28526	0.0222977	0.156487
DPP9	ENSG00000142002	48.7622	0.703136	0.30794	2.28335	0.0224095	0.156682
GCN1L1	ENSG00000089154	42.9452	0.702821	0.30797	2.28211	0.022483	0.15701
CCZ1	ENSG00000122674	32.8445	-0.818241	0.359549	-2.27574	0.0228615	0.159353
PSMC2	ENSG00000161057	134.163	-0.706309	0.31045	-2.27511	0.0228991	0.159353
UQCR10	ENSG00000184076	1007.15	0.469044	0.206136	2.27541	0.0228812	0.159353
DUS1L	ENSG00000169718	60.5173	0.746066	0.328037	2.27434	0.0229458	0.159491
BCAS4	ENSG00000124243	40.5321	-0.818084	0.359808	-2.27367	0.0229861	0.159584
PEPD	ENSG00000124299	46.5278	-0.793489	0.349094	-2.273	0.0230263	0.159676
FAM111B	ENSG00000189057	57.5369	-0.7209	0.31731	-2.27191	0.0230919	0.159944
JKAMP	ENSG00000050130	27.4838	-0.863652	0.380283	-2.27108	0.0231424	0.160107
SEC24C	ENSG00000176986	46.6389	0.72427	0.319465	2.26714	0.0233818	0.161574
STARD7	ENSG00000084090	86.0595	0.63977	0.282499	2.26468	0.0235321	0.162423
RP11-22P6.3	ENSG00000260442	36.8239	0.806049	0.355998	2.2642	0.023562	0.162441
TNFAIP8	ENSG00000145779	22.2723	-0.92822	0.4101	-2.2634	0.0236113	0.162591
LTV1	ENSG00000135521	39.5171	-0.779674	0.344567	-2.26276	0.0236502	0.162671
PSMD12	ENSG00000197170	100.134	-0.674651	0.298816	-2.25775	0.0239613	0.164429
CPNE1	ENSG00000214078	96.0742	-0.658623	0.291663	-2.25817	0.0239351	0.164429
UTP11L	ENSG00000183520	120.464	-0.560627	0.248474	-2.25628	0.0240531	0.164868
RP11-252A24.7	ENSG00000260539	27.07	0.978109	0.433794	2.25478	0.0241474	0.165323
SRP9	ENSG00000143742	419.35	-0.508478	0.225855	-2.25135	0.0243634	0.16619
GMPS	ENSG00000163655	71.9281	-0.675406	0.30019	-2.24992	0.0244537	0.16619
SYAP1	ENSG00000169895	144.456	-0.54848	0.243768	-2.25001	0.0244484	0.16619
VAMP7	ENSG00000124333	38.8381	-0.708044	0.314652	-2.25024	0.0244334	0.16619
FARP1	ENSG00000152767	25.5443	0.981583	0.435975	2.25147	0.0243561	0.16619
VRK1	ENSG00000100749	42.154	-0.775942	0.344915	-2.24966	0.0244703	0.16619
SGSM3	ENSG00000100359	28.2656	0.852927	0.379077	2.25001	0.0244485	0.16619
CUL1	ENSG00000055130	33.3177	0.754246	0.335528	2.24794	0.0245799	0.16649
RTN3	ENSG00000133318	110.049	-0.623851	0.277482	-2.24826	0.0245597	0.16649
LENG8	ENSG00000167615	31.4175	0.971527	0.432241	2.24765	0.0245986	0.16649
HIST1H2AC	ENSG00000180573	31.3228	0.957035	0.426154	2.24575	0.0247199	0.166603
EFTUD2	ENSG00000108883	61.3881	0.630792	0.28089	2.24569	0.0247237	0.166603
PLCB4	ENSG00000101333	26.2902	-0.919249	0.409372	-2.24551	0.0247354	0.166603
ZFAS1	ENSG00000177410	320.918	-0.4	0.178159	-2.24519	0.0247558	0.166603
URI1	ENSG00000105176	71.716	-0.595399	0.265183	-2.24524	0.024753	0.166603
PPID	ENSG00000171497	41.6879	-0.709148	0.316282	-2.24214	0.0249522	0.167355
NOL7	ENSG00000225921	328.122	-0.498794	0.222446	-2.24231	0.0249411	0.167355
CTSZ	ENSG00000101160	34.6701	-0.732754	0.326738	-2.24264	0.0249201	0.167355
IGFBP6	ENSG00000167779	153.791	-0.543123	0.242379	-2.2408	0.0250393	0.167432
CLCN7	ENSG00000103249	36.7532	0.747993	0.333828	2.24065	0.0250485	0.167432
NIP7	ENSG00000132603	86.7507	-0.521101	0.232484	-2.24145	0.0249972	0.167432
TBCA	ENSG00000171530	291.9	-0.453957	0.202652	-2.24008	0.0250858	0.167493
CC2D1B	ENSG00000154222	23.8999	0.965504	0.431188	2.23917	0.0251448	0.167698
NUDT21	ENSG00000167005	134.819	-0.589044	0.263361	-2.23665	0.0253095	0.168607
PI4K2A	ENSG00000155252	47.1855	0.699148	0.312654	2.23617	0.0253406	0.168624
MAP7D1	ENSG00000116871	172.28	0.443422	0.198371	2.23532	0.0253965	0.168807
THEM6	ENSG00000130193	47.6733	0.742742	0.332658	2.23275	0.0255656	0.169741
MORF4L1	ENSG00000185787	369.658	-0.610691	0.273837	-2.23013	0.025739	0.170548
GATAD2A	ENSG00000167491	64.9167	0.666783	0.299	2.23004	0.0257447	0.170548
ARHGEF2	ENSG00000116584	32.7588	0.964829	0.433297	2.22672	0.0259662	0.171642
SMC6	ENSG00000163029	35.8578	-0.999968	0.449149	-2.22636	0.0259898	0.171642
SF3B14	ENSG00000115128	449.846	-0.477537	0.214502	-2.22626	0.0259967	0.171642
SEMA7A	ENSG00000138623	49.2479	1.03763	0.466306	2.22522	0.0260664	0.171911
ZMPSTE24	ENSG00000084073	34.8191	-0.721536	0.324453	-2.22385	0.0261583	0.172155
NBPF10	ENSG00000163386	33.5068	0.809001	0.363932	2.22294	0.0262196	0.172155
HSF1	ENSG00000185122	108.492	0.53301	0.239747	2.22322	0.026201	0.172155
AKT1S1	ENSG00000204673	70.8229	-0.557393	0.250671	-2.2236	0.0261755	0.172155
TAF9	ENSG00000085231	335.274	-0.50266	0.226214	-2.22206	0.0262793	0.172356
RP11-111M22.3	ENSG00000255135	50.3158	0.712945	0.320947	2.22138	0.0263255	0.172469
PTPLA	ENSG00000165996	80.8382	-0.661374	0.297934	-2.21987	0.0264279	0.172948
EIF6	ENSG00000242372	846.409	-0.554048	0.249761	-2.21831	0.0265338	0.17345
KLF6	ENSG00000067082	113.019	0.65832	0.296979	2.21672	0.0266422	0.173775
ARHGEF18	ENSG00000104880	44.723	0.697796	0.314777	2.2168	0.0266371	0.173775
DDR2	ENSG00000162733	50.8313	0.876338	0.395451	2.21605	0.0266883	0.173885
NUCKS1	ENSG00000069275	428.567	-0.547039	0.246926	-2.2154	0.0267328	0.173983
EPHB2	ENSG00000133216	50.7306	-0.806043	0.364016	-2.21431	0.0268077	0.174229
PNKD	ENSG00000127838	259.167	0.489553	0.221118	2.21399	0.0268294	0.174229
DAZAP1	ENSG00000071626	146.573	0.513208	0.2319	2.21306	0.0268938	0.174457
RP11-680A11.5	ENSG00000257605	33.9425	0.76203	0.344402	2.21261	0.0269243	0.174463
MOB1A	ENSG00000114978	79.8625	-0.55227	0.249703	-2.21171	0.026987	0.174634
TMEM126A	ENSG00000171202	92.8165	-0.562439	0.254338	-2.21138	0.0270095	0.174634
RPLP0	ENSG00000089157	4796.19	0.360671	0.163131	2.21093	0.0270407	0.174645
ATP5J	ENSG00000154723	555.586	-0.460932	0.208525	-2.21044	0.0270745	0.174673
SMIM15	ENSG00000188725	96.1125	-0.592173	0.268526	-2.20527	0.0274349	0.17668
NME1	ENSG00000239672	967.118	-0.481559	0.218381	-2.20513	0.0274452	0.17668
IAH1	ENSG00000134330	86.4289	-0.598554	0.271543	-2.20427	0.0275055	0.176818
CDK16	ENSG00000102225	76.6044	0.5835	0.264755	2.20393	0.0275294	0.176818
ALG5	ENSG00000120697	37.6895	-0.898814	0.407894	-2.20355	0.0275561	0.176818
FAM162A	ENSG00000114023	97.1202	-0.599908	0.272314	-2.203	0.0275949	0.176874
TRIM26	ENSG00000234127	21.7635	0.936833	0.425335	2.20258	0.0276244	0.176874
RPS6	ENSG00000137154	6783.39	0.446788	0.203023	2.20068	0.0277589	0.177352
SAMD1	ENSG00000141858	62.3996	0.735916	0.33438	2.20084	0.0277476	0.177352
RECQL4	ENSG00000160957	35.419	0.757158	0.344127	2.20023	0.0277908	0.177365
ARID4B	ENSG00000054267	46.0447	-0.661506	0.300899	-2.19843	0.0279185	0.177988
NF2	ENSG00000186575	68.4174	0.597385	0.27188	2.19724	0.0280033	0.178337
DDX1	ENSG00000079785	96.9935	-0.751033	0.341937	-2.19641	0.0280627	0.178523
MROH1	ENSG00000179832	22.6413	0.865665	0.394357	2.19513	0.028154	0.178721
ITGA5	ENSG00000161638	122.851	0.74692	0.340208	2.19548	0.028129	0.178721
C9orf89	ENSG00000165233	139.361	0.682378	0.310943	2.19455	0.028196	0.178796
SH3BP5	ENSG00000131370	21.5925	-0.864811	0.394254	-2.19354	0.0282686	0.179065
CAV2	ENSG00000105971	256.262	0.511249	0.233127	2.19301	0.028307	0.179116
PARD3	ENSG00000148498	32.4126	0.75516	0.344422	2.19254	0.0283403	0.179136
RFC2	ENSG00000049541	106.973	-0.54804	0.250064	-2.1916	0.0284084	0.179375
GOLGA3	ENSG00000090615	58.4396	0.628656	0.287094	2.18972	0.0285444	0.180042
UGP2	ENSG00000169764	69.3312	-0.699038	0.319361	-2.18886	0.028607	0.180054
TTC39C	ENSG00000168234	31.2574	0.742205	0.339074	2.18892	0.0286028	0.180054
THRAP3	ENSG00000054118	158.76	-0.511308	0.233653	-2.18832	0.028646	0.180108
BLOC1S4	ENSG00000186222	48.0116	-0.674594	0.308424	-2.18723	0.0287255	0.180417
TROVE2	ENSG00000116747	31.7395	-0.862729	0.394594	-2.18637	0.0287883	0.180606
CCT4	ENSG00000115484	262.082	-0.728317	0.333237	-2.18558	0.0288462	0.180606
MALSU1	ENSG00000156928	117.949	-0.64091	0.293276	-2.18535	0.0288633	0.180606
TRIM56	ENSG00000169871	28.7543	0.841692	0.385186	2.18516	0.0288774	0.180606
CCDC104	ENSG00000163001	102.045	-0.564859	0.258629	-2.18405	0.0289589	0.180924
NDUFA4	ENSG00000189043	754.526	-0.719935	0.329737	-2.18336	0.0290092	0.181048
UBA2	ENSG00000126261	59.9141	-0.578295	0.264978	-2.18242	0.0290782	0.181288
TCF3	ENSG00000071564	44.8698	0.705959	0.323565	2.18181	0.0291232	0.181378
TP53I3	ENSG00000115129	39.5194	-0.683615	0.313642	-2.1796	0.0292869	0.182015
CDKN2D	ENSG00000129355	80.1181	0.828232	0.379983	2.17965	0.0292831	0.182015
CHTF8	ENSG00000168802	73.9488	0.603061	0.276816	2.17856	0.0293646	0.182306
CCNL2	ENSG00000221978	76.1996	0.583175	0.267817	2.17751	0.0294422	0.182597
RP11-525A16.4	ENSG00000273143	21.876	1.02991	0.473239	2.1763	0.0295331	0.182658
FDX1	ENSG00000137714	100.716	-0.588179	0.270285	-2.17614	0.0295444	0.182658
MVP	ENSG00000013364	65.4472	0.587823	0.270119	2.17616	0.0295431	0.182658
RDX	ENSG00000137710	135.836	-0.572373	0.263271	-2.17408	0.0296991	0.183286
EXOSC5	ENSG00000077348	76.9054	-0.618231	0.28438	-2.17396	0.0297079	0.183286
KIAA1199	ENSG00000103888	53.4882	-1.943	0.893968	-2.17346	0.0297458	0.18333
FAM120A	ENSG00000048828	63.8399	0.593629	0.273215	2.17276	0.0297987	0.183465
FHL3	ENSG00000183386	37.986	-0.713719	0.32902	-2.16923	0.0300655	0.184201
SPATS2L	ENSG00000196141	201.867	0.508274	0.234393	2.16847	0.030123	0.184201
MRPS30	ENSG00000112996	44.679	-0.696461	0.321322	-2.16748	0.0301979	0.184201
AGPAT6	ENSG00000158669	43.2547	0.772684	0.356088	2.16992	0.0300127	0.184201
EBAG9	ENSG00000147654	42.3815	-0.687537	0.317187	-2.16761	0.0301887	0.184201
NDUFA9	ENSG00000139180	187.241	-0.608138	0.280299	-2.16961	0.0300365	0.184201
TIPIN	ENSG00000075131	31.9093	-0.809529	0.373158	-2.1694	0.0300522	0.184201
ACTG1	ENSG00000184009	3418.96	-0.330467	0.152419	-2.16815	0.0301472	0.184201
P4HB	ENSG00000185624	403.659	0.411217	0.189662	2.16816	0.0301467	0.184201
EIF2B4	ENSG00000115211	22.9516	-0.96145	0.443783	-2.16649	0.030274	0.184376
CAV1	ENSG00000105974	1266.75	0.605248	0.279444	2.1659	0.0303187	0.184376
MAPRE1	ENSG00000101367	137.491	-0.521493	0.240776	-2.16589	0.0303199	0.184376
SPTSSA	ENSG00000165389	87.7888	-0.728602	0.336515	-2.16514	0.030377	0.184534
NDUFAF2	ENSG00000164182	174.367	-0.518321	0.239596	-2.16331	0.030517	0.185195
PITRM1	ENSG00000107959	49.5509	0.655755	0.303311	2.16199	0.0306189	0.185434
ALKBH3	ENSG00000166199	29.8459	-0.788279	0.364564	-2.16225	0.0305988	0.185434
FANCG	ENSG00000221829	33.5829	0.837962	0.387721	2.16125	0.030676	0.18559
PTGR1	ENSG00000106853	129.953	0.713285	0.330151	2.16048	0.0307355	0.18576
ZNF106	ENSG00000103994	78.5774	0.548906	0.254235	2.15905	0.0308461	0.186239
TSC22D4	ENSG00000166925	68.5785	0.658743	0.305246	2.15807	0.0309226	0.186321
PSMG2	ENSG00000128789	103.861	-0.647366	0.299971	-2.15809	0.0309205	0.186321
UBE2H	ENSG00000186591	65.579	0.566252	0.262438	2.15766	0.0309541	0.186321
SCNM1	ENSG00000163156	63.1477	-0.602001	0.279326	-2.15519	0.0311466	0.186965
KLHDC3	ENSG00000124702	117.486	0.505873	0.23468	2.15559	0.0311161	0.186965
TRAPPC4	ENSG00000196655	254.477	-0.686689	0.318697	-2.15468	0.031187	0.186965
EMP2	ENSG00000213853	40.1027	-0.821496	0.381238	-2.15481	0.0311765	0.186965
NBPF1	ENSG00000219481	30.0731	-0.720756	0.334665	-2.15366	0.0312665	0.187251
CNTROB	ENSG00000170037	22.7588	0.966604	0.449329	2.15122	0.0314591	0.188215
TBC1D10B	ENSG00000169221	39.5739	0.765292	0.356122	2.14896	0.0316375	0.188901
SCO2	ENSG00000130489	127.576	0.48003	0.223352	2.14921	0.0316178	0.188901
RPL8	ENSG00000161016	7732.2	0.34328	0.160022	2.1452	0.0319366	0.190495
DESI2	ENSG00000121644	50.9716	-0.59824	0.279062	-2.14375	0.0320526	0.190995
PMM1	ENSG00000100417	76.2382	0.609707	0.284641	2.14202	0.0321915	0.19163
AKIRIN2	ENSG00000135334	25.1757	-0.848433	0.396433	-2.14017	0.0323413	0.192329
AP006222.2	ENSG00000228463	76.2509	0.550186	0.257317	2.13816	0.0325036	0.19297
TMEM158	ENSG00000249992	133.179	1.52241	0.712224	2.13754	0.0325542	0.19297
EIF4E	ENSG00000151247	82.5767	-0.711811	0.333007	-2.13753	0.0325553	0.19297
MAPKAP1	ENSG00000119487	144.878	0.476375	0.222894	2.13723	0.0325794	0.19297
MRPS12	ENSG00000128626	304.127	-0.382821	0.179155	-2.13681	0.0326133	0.192978
USP36	ENSG00000055483	30.433	0.853218	0.399393	2.13629	0.0326562	0.193039
CKAP2	ENSG00000136108	126.622	0.621732	0.291219	2.13493	0.0327666	0.193499
GOLGA2	ENSG00000167110	84.5199	0.705261	0.330434	2.13435	0.0328142	0.193587
TIMM10	ENSG00000134809	336.159	-0.392616	0.184042	-2.13329	0.0329008	0.193776
PMAIP1	ENSG00000141682	121.002	0.527202	0.247146	2.13316	0.0329115	0.193776
C11orf83	ENSG00000204922	231.611	-0.466189	0.218745	-2.1312	0.033073	0.194533
KIAA0930	ENSG00000100364	34.0447	0.705464	0.331415	2.12864	0.0332839	0.19558
FKBP10	ENSG00000141756	66.8321	0.557119	0.262259	2.12431	0.0336444	0.197412
NPEPPS	ENSG00000141279	34.624	0.739749	0.348265	2.12409	0.0336622	0.197412
PLEKHJ1	ENSG00000104886	238.685	0.414874	0.195401	2.1232	0.0337374	0.197657
HAX1	ENSG00000143575	192.748	-0.588301	0.2772	-2.1223	0.0338128	0.197903
HSPBP1	ENSG00000133265	52.2861	-0.673666	0.3176	-2.12112	0.0339121	0.198289
MARK3	ENSG00000075413	44.068	0.668584	0.315379	2.11994	0.0340112	0.198672
PPFIBP1	ENSG00000110841	92.5001	0.651952	0.307934	2.11718	0.0342447	0.199839
RGP1	ENSG00000107185	35.8856	0.785678	0.371184	2.11668	0.0342869	0.199889
PEA15	ENSG00000162734	103.954	-0.543748	0.25732	-2.11312	0.0345905	0.200085
COL6A3	ENSG00000163359	62.3204	0.6404	0.302719	2.11549	0.0343883	0.200085
PLRG1	ENSG00000171566	34.2669	-0.897743	0.424824	-2.11321	0.0345827	0.200085
NHP2	ENSG00000145912	728.626	-0.357928	0.169306	-2.11409	0.0345078	0.200085
AVPI1	ENSG00000119986	54.3899	0.842115	0.398426	2.1136	0.0345493	0.200085
NFKB2	ENSG00000077150	23.2977	0.861005	0.407421	2.11331	0.0345746	0.200085
CNOT1	ENSG00000125107	72.4517	0.533425	0.252401	2.1134	0.0345664	0.200085
CHMP1A	ENSG00000131165	90.8698	0.51931	0.245546	2.11492	0.0344369	0.200085
SLC35B2	ENSG00000157593	96.6542	0.52516	0.248751	2.11118	0.0347566	0.20085
CAMSAP2	ENSG00000118200	22.7769	-0.85276	0.404335	-2.10904	0.0349411	0.201664
AGFG1	ENSG00000173744	30.0584	0.781521	0.370607	2.10876	0.0349655	0.201664
TIMM50	ENSG00000105197	100.82	-0.501796	0.238056	-2.10789	0.0350403	0.201899
QSOX2	ENSG00000165661	29.8601	0.772385	0.36685	2.10545	0.0352522	0.20253
EFEMP2	ENSG00000172638	65.7818	-0.553072	0.262629	-2.1059	0.0352128	0.20253
IFT52	ENSG00000101052	38.8435	-0.686195	0.325885	-2.10563	0.0352362	0.20253
CCDC28B	ENSG00000160050	85.8176	-0.524451	0.249249	-2.10413	0.0353674	0.202809
POLR2I	ENSG00000105258	263.012	-0.483023	0.229562	-2.10411	0.0353693	0.202809
SVIL	ENSG00000197321	43.0849	0.929451	0.442071	2.10249	0.0355104	0.203421
EIF3I	ENSG00000084623	370.577	-0.575293	0.27387	-2.10061	0.0356754	0.204097
ANXA11	ENSG00000122359	136.032	0.481444	0.22922	2.10036	0.0356972	0.204097
CCDC51	ENSG00000164051	31.2049	-0.760398	0.362227	-2.09923	0.0357964	0.204239
NDUFB5	ENSG00000136521	160.249	-0.4816	0.229371	-2.09965	0.0357597	0.204239
EAPP	ENSG00000129518	37.3359	-0.676172	0.322196	-2.09864	0.035849	0.204239
CFDP1	ENSG00000153774	108.605	-0.464014	0.221116	-2.09851	0.0358597	0.204239
RHOC	ENSG00000155366	645.781	-0.356123	0.169891	-2.09618	0.0360661	0.204601
NME7	ENSG00000143156	32.2251	-0.886204	0.422731	-2.09638	0.0360485	0.204601
FAHD2A	ENSG00000115042	37.2096	0.691837	0.329938	2.09687	0.036005	0.204601
HERPUD1	ENSG00000051108	106.761	-0.583396	0.278358	-2.09584	0.0360959	0.204601
ZBTB7A	ENSG00000178951	52.3853	0.680592	0.324615	2.09661	0.0360277	0.204601
NARS	ENSG00000134440	114.183	-0.599526	0.286134	-2.09526	0.0361479	0.2047
ERLEC1	ENSG00000068912	83.438	-0.511482	0.2444	-2.09281	0.0363663	0.205158
ALCAM	ENSG00000170017	147.501	-0.466551	0.222973	-2.09241	0.0364018	0.205158
ZMAT2	ENSG00000146007	113.379	-0.512603	0.244851	-2.09353	0.036302	0.205158
PDCD5	ENSG00000105185	624.213	-0.428324	0.204636	-2.0931	0.0363401	0.205158
FTL	ENSG00000087086	9957.49	0.375684	0.179539	2.0925	0.0363939	0.205158
GOT1	ENSG00000120053	45.5496	-0.673892	0.322402	-2.09022	0.0365977	0.206066
UBA5	ENSG00000081307	21.8311	-0.935871	0.448874	-2.08493	0.0370757	0.206669
MCM4	ENSG00000104738	106.315	0.488546	0.234181	2.08619	0.0369614	0.206669
LPAR1	ENSG00000198121	41.1231	0.857613	0.410965	2.08683	0.0369037	0.206669
ENG	ENSG00000106991	44.9564	0.972959	0.466479	2.08575	0.0370012	0.206669
FBXW5	ENSG00000159069	147.348	0.587385	0.281785	2.08452	0.0371129	0.206669
MARVELD1	ENSG00000155254	60.1604	0.611403	0.293221	2.08512	0.037058	0.206669
PRDX3	ENSG00000165672	347.364	-0.634208	0.30381	-2.08752	0.0368413	0.206669
MZT1	ENSG00000204899	264.217	0.596348	0.286007	2.08508	0.0370619	0.206669
GNPNAT1	ENSG00000100522	54.8368	-0.569992	0.273237	-2.08607	0.0369721	0.206669
SLC35B1	ENSG00000121073	86.5561	-0.491487	0.235481	-2.08716	0.0368734	0.206669
TMEM147	ENSG00000105677	225.123	-0.473806	0.22731	-2.08441	0.037123	0.206669
POLR2F	ENSG00000100142	579.024	0.356084	0.170602	2.08722	0.0368682	0.206669
TIMM8A	ENSG00000126953	101.777	-0.486519	0.233469	-2.08386	0.0371725	0.20675
CWC15	ENSG00000150316	142.875	-0.464902	0.223184	-2.08305	0.037247	0.20697
UGGT1	ENSG00000136731	31.2316	0.784609	0.376953	2.08145	0.0373927	0.207586
STT3B	ENSG00000163527	43.0391	-0.63797	0.306619	-2.08066	0.0374653	0.2076
DDX11	ENSG00000013573	49.7116	0.631425	0.303424	2.081	0.0374342	0.2076
SNRPE	ENSG00000182004	414.641	-0.424358	0.203992	-2.08027	0.0375012	0.207605
ARHGAP23	ENSG00000225485	29.1575	0.78995	0.380175	2.07786	0.0377222	0.208633
UHMK1	ENSG00000152332	38.8536	-0.640069	0.308273	-2.07631	0.0378657	0.209089
CPSF1	ENSG00000071894	29.4299	0.734013	0.353536	2.0762	0.0378751	0.209089
CALD1	ENSG00000122786	361.116	-0.52801	0.254531	-2.07444	0.0380382	0.209295
PTMS	ENSG00000159335	618.042	-0.36261	0.174813	-2.07428	0.0380536	0.209295
CXXC1	ENSG00000154832	33.5213	0.768083	0.370252	2.07449	0.0380342	0.209295
TBC1D10A	ENSG00000099992	26.7211	0.769478	0.370946	2.07437	0.0380453	0.209295
PHACTR4	ENSG00000204138	38.1684	0.688946	0.332247	2.0736	0.0381169	0.209398
VARS	ENSG00000204394	62.4945	0.567872	0.273896	2.07331	0.038143	0.209398
IER2	ENSG00000160888	112.726	0.58861	0.284103	2.07182	0.0382821	0.209967
SCCPDH	ENSG00000143653	84.6808	-0.58688	0.283439	-2.07057	0.0383993	0.210064
COQ5	ENSG00000110871	32.3144	-0.724241	0.349719	-2.07092	0.0383658	0.210064
TBCB	ENSG00000105254	264.878	-0.488235	0.235806	-2.07049	0.0384061	0.210064
MICU2	ENSG00000165487	22.1396	-0.8769	0.423873	-2.06878	0.0385668	0.210749
STK16	ENSG00000115661	34.9635	0.681316	0.329674	2.06663	0.0387688	0.211658
MED8	ENSG00000159479	89.4533	-0.545103	0.263928	-2.06535	0.0388901	0.211812
RRP9	ENSG00000114767	45.6233	-0.671016	0.324891	-2.06536	0.0388891	0.211812
ENOPH1	ENSG00000145293	53.4238	-0.588222	0.284878	-2.06482	0.03894	0.211812
UPP1	ENSG00000183696	291.299	-0.655604	0.317456	-2.06518	0.0389061	0.211812
EMC7	ENSG00000134153	152.217	-0.566224	0.274333	-2.064	0.0390175	0.212039
MYO19	ENSG00000141140	87.6774	0.62057	0.300806	2.06302	0.0391104	0.212349
PHAX	ENSG00000164902	82.3731	-0.55694	0.270253	-2.06081	0.0393211	0.21316
PRRC2A	ENSG00000204469	112.14	0.5751	0.27908	2.0607	0.0393315	0.21316
EMC3	ENSG00000125037	70.7234	-0.570804	0.277261	-2.05872	0.0395209	0.213469
BDNF	ENSG00000176697	52.5016	-0.628174	0.305146	-2.0586	0.0395327	0.213469
TUBA1B	ENSG00000123416	3196.22	-0.523624	0.254293	-2.05913	0.0394814	0.213469
C12orf45	ENSG00000151131	41.2918	-0.722865	0.351104	-2.05883	0.0395104	0.213469
RP6-109B7.3	ENSG00000241990	55.6425	0.850694	0.413466	2.05747	0.039641	0.213859
LOXL2	ENSG00000134013	130.825	0.457364	0.222437	2.05615	0.0397684	0.21416
ZNF22	ENSG00000165512	63.8954	-0.634337	0.308508	-2.05614	0.0397689	0.21416
PRCP	ENSG00000137509	21.6328	-0.866194	0.421688	-2.05411	0.0399652	0.214826
GAS6	ENSG00000183087	204.497	0.747726	0.363956	2.05444	0.0399333	0.214826
EIF4G1	ENSG00000114867	298.501	0.49015	0.238942	2.05134	0.0402341	0.21588
GPR176	ENSG00000166073	47.6422	0.725104	0.353459	2.05145	0.0402232	0.21588
PRDX4	ENSG00000123131	443.41	-0.455755	0.22223	-2.05083	0.0402837	0.215951
CD55	ENSG00000196352	37.916	-0.784578	0.382709	-2.05006	0.0403583	0.215961
SMC4	ENSG00000113810	297.656	-0.430615	0.21004	-2.05016	0.0403489	0.215961
CNBP	ENSG00000169714	470.549	-0.452206	0.220683	-2.04912	0.0404506	0.216057
PSMC6	ENSG00000100519	58.7468	-0.726414	0.354551	-2.04883	0.040479	0.216057
DUSP14	ENSG00000161326	102.565	-0.512248	0.250028	-2.04876	0.0404856	0.216057
RILPL2	ENSG00000150977	30.3672	-0.714892	0.349091	-2.04787	0.0405732	0.216329
TCTA	ENSG00000145022	35.7497	0.687742	0.336122	2.04611	0.0407456	0.216859
MLLT6	ENSG00000108292	35.5041	0.794631	0.388323	2.04632	0.0407252	0.216859
SH3BGRL3	ENSG00000142669	2279.86	-0.438565	0.214552	-2.0441	0.0409439	0.217719
WWC3	ENSG00000047644	26.9889	1.25701	0.615107	2.04356	0.0409966	0.217804
SMARCC1	ENSG00000173473	70.0302	-0.540943	0.264958	-2.04162	0.0411895	0.218437
XPO7	ENSG00000130227	23.7147	0.803814	0.393667	2.04186	0.0411653	0.218437
KIF2C	ENSG00000142945	60.4253	0.590822	0.289748	2.03909	0.0414415	0.218563
CHAC2	ENSG00000143942	32.9566	-0.719221	0.352584	-2.03986	0.0413642	0.218563
GPX8	ENSG00000164294	91.1802	-0.576113	0.282506	-2.03929	0.0414208	0.218563
ATRX	ENSG00000085224	95.8666	-0.48229	0.236432	-2.03987	0.0413629	0.218563
PPHLN1	ENSG00000134283	58.6552	-0.54605	0.267803	-2.039	0.0414501	0.218563
AP2S1	ENSG00000042753	1320.39	-0.393166	0.192648	-2.04085	0.041266	0.218563
NUP50	ENSG00000093000	47.8574	0.612857	0.300599	2.03879	0.0414713	0.218563
UBTF	ENSG00000108312	71.5139	0.546231	0.267998	2.03819	0.0415313	0.218685
SEC11C	ENSG00000166562	102.264	-0.565835	0.277712	-2.03749	0.0416011	0.218858
GSPT1	ENSG00000103342	134.569	-0.560478	0.275203	-2.0366	0.0416906	0.219134
GBA	ENSG00000177628	67.9976	0.632579	0.310791	2.03538	0.0418124	0.21958
HOOK2	ENSG00000095066	22.3804	0.913021	0.448699	2.03482	0.0418689	0.219682
RARS	ENSG00000113643	74.0845	-0.823562	0.404981	-2.03358	0.0419936	0.220142
LPCAT2	ENSG00000087253	28.6695	-0.772153	0.380094	-2.03148	0.0422064	0.221062
GRINA	ENSG00000178719	82.8344	0.591999	0.291589	2.03025	0.0423308	0.221322
STX4	ENSG00000103496	65.9065	0.534771	0.263383	2.03039	0.0423168	0.221322
MGLL	ENSG00000074416	50.3634	0.598359	0.294815	2.02961	0.0423959	0.221467
RAC1	ENSG00000136238	1001.15	-0.387726	0.191262	-2.0272	0.042642	0.222487
STC1	ENSG00000159167	22.1296	2.15979	1.06577	2.02651	0.0427129	0.222487
DICER1	ENSG00000100697	22.7878	-0.812779	0.401129	-2.02623	0.0427413	0.222487
RUNX1	ENSG00000159216	36.0418	0.677596	0.334395	2.02634	0.0427304	0.222487
NDUFS2	ENSG00000158864	58.6745	-0.571752	0.282364	-2.02488	0.0428799	0.223013
PACSIN3	ENSG00000165912	61.3272	-0.582243	0.287663	-2.02405	0.0429654	0.223262
ELTD1	ENSG00000162618	29.6396	0.721665	0.356689	2.02324	0.0430489	0.223367
TRIP12	ENSG00000153827	45.4672	0.667805	0.330087	2.02312	0.0430609	0.223367
DUSP11	ENSG00000144048	36.3607	-0.693316	0.343066	-2.02094	0.043286	0.224142
C10orf32	ENSG00000166275	36.1407	0.703833	0.348242	2.0211	0.0432691	0.224142
GLO1	ENSG00000124767	221.072	-0.523546	0.259836	-2.01491	0.043914	0.226572
CCND3	ENSG00000112576	113.588	0.497287	0.246841	2.0146	0.0439463	0.226572
BTBD10	ENSG00000148925	29.5747	-0.766305	0.38035	-2.01474	0.0439323	0.226572
CSNK2A2	ENSG00000070770	35.6265	0.667742	0.33138	2.01504	0.0439008	0.226572
PRR14L	ENSG00000183530	28.329	0.794833	0.394411	2.01524	0.0438795	0.226572
VPS26A	ENSG00000122958	77.1186	-0.597544	0.296819	-2.01316	0.044098	0.227156
CTDSPL	ENSG00000144677	47.5563	0.825592	0.410457	2.0114	0.0442835	0.227716
GMNN	ENSG00000112312	184.715	-0.577519	0.287102	-2.01155	0.0442674	0.227716
COPS3	ENSG00000141030	115.795	-0.530204	0.263686	-2.01074	0.0443531	0.227737
SEC14L2	ENSG00000100003	26.5921	0.799403	0.397588	2.01063	0.0443644	0.227737
MLF1	ENSG00000178053	37.7515	-0.651483	0.324119	-2.01001	0.04443	0.227877
EIF3D	ENSG00000100353	204.485	0.465211	0.231592	2.00876	0.0445628	0.22836
RPS20	ENSG00000008988	2095.96	0.356813	0.177787	2.00697	0.0447531	0.22894
PPP4R1	ENSG00000154845	59.1306	0.574624	0.286271	2.00727	0.0447206	0.22894
TRAF3	ENSG00000131323	22.9151	0.761963	0.379883	2.00578	0.0448794	0.229388
CHMP2B	ENSG00000083937	75.0676	-0.54919	0.273947	-2.00473	0.044992	0.229568
CDKN2AIPNL	ENSG00000237190	114.707	-0.452059	0.225457	-2.00508	0.0449547	0.229568
FAM127C	ENSG00000212747	54.6238	-0.574275	0.287151	-1.99991	0.0455101	0.231812
RNF114	ENSG00000124226	81.3854	-0.571275	0.285632	-2.00004	0.0454961	0.231812
RBMX	ENSG00000147274	179.135	-0.408826	0.2045	-1.99915	0.0455916	0.232028
MAPKAPK3	ENSG00000114738	42.7347	0.635031	0.317879	1.99772	0.0457474	0.232563
PFDN1	ENSG00000113068	205.184	-0.445499	0.223033	-1.99746	0.0457753	0.232563
NOC3L	ENSG00000173145	53.133	-0.68606	0.343571	-1.99685	0.0458412	0.232699
GRWD1	ENSG00000105447	41.4275	-0.599023	0.300069	-1.99628	0.0459032	0.232815
RTFDC1	ENSG00000022277	162.751	-0.51993	0.260641	-1.99481	0.0460633	0.233427
APIP	ENSG00000149089	51.1485	-0.677137	0.339554	-1.9942	0.0461305	0.233568
CMPK1	ENSG00000162368	120.366	-0.445825	0.223871	-1.99144	0.0464327	0.234595
FPGS	ENSG00000136877	43.1129	0.618811	0.310763	1.99126	0.046452	0.234595
ATP5C1	ENSG00000165629	273.097	-0.595737	0.29907	-1.99196	0.046375	0.234595
GOLGA7	ENSG00000147533	60.2919	-0.580048	0.291384	-1.99066	0.0465177	0.234727
NDUFA10	ENSG00000130414	75.2548	-0.522273	0.262494	-1.98966	0.0466288	0.235087
FAM126A	ENSG00000122591	44.2031	-0.690201	0.347045	-1.98879	0.0467239	0.235166
MIS18A	ENSG00000159055	31.1302	-0.755874	0.380025	-1.98901	0.0466997	0.235166
IFT81	ENSG00000122970	32.7146	-0.651427	0.327765	-1.98748	0.0468693	0.235506
TNFRSF12A	ENSG00000006327	1706.62	-0.452805	0.22783	-1.98747	0.0468708	0.235506
ZSWIM8	ENSG00000214655	24.7377	0.777413	0.391415	1.98616	0.0470153	0.23591
STRAP	ENSG00000023734	377.632	-0.406798	0.204868	-1.98566	0.0470707	0.23591
RNASEH2B	ENSG00000136104	166.142	0.527989	0.265856	1.98599	0.0470339	0.23591
ZFAND5	ENSG00000107372	69.3908	0.576039	0.290152	1.9853	0.0471109	0.235912
NGLY1	ENSG00000151092	24.9922	-0.717546	0.361544	-1.98467	0.0471808	0.236063
MCM2	ENSG00000073111	81.0513	0.474475	0.23916	1.98392	0.0472648	0.236284
MTFR1	ENSG00000066855	34.0502	-0.719304	0.362899	-1.98211	0.0474672	0.237025
CD151	ENSG00000177697	362.195	-0.528993	0.266915	-1.98188	0.0474929	0.237025
PRDX1	ENSG00000117450	777.055	-0.540579	0.273073	-1.97962	0.0477466	0.23731
TBC1D1	ENSG00000065882	49.0331	0.683923	0.345357	1.98034	0.0476657	0.23731
NOP16	ENSG00000048162	126.877	-0.516017	0.260532	-1.98063	0.0476327	0.23731
ATP6V0E2	ENSG00000171130	76.9983	0.572757	0.289332	1.97959	0.0477501	0.23731
ARL16	ENSG00000214087	222.711	0.380658	0.192273	1.97978	0.0477279	0.23731
KIFC1	ENSG00000237649	26.6082	0.752152	0.380159	1.97852	0.0478698	0.237368
CDK1	ENSG00000170312	244.668	-0.620922	0.313749	-1.97904	0.0478112	0.237368
PPIF	ENSG00000108179	224.139	0.440375	0.222664	1.97775	0.0479568	0.237368
TIMM8B	ENSG00000150779	350.766	-0.527681	0.266815	-1.9777	0.0479621	0.237368
EIF5	ENSG00000100664	411.838	-0.407427	0.205961	-1.97817	0.0479093	0.237368
HIBADH	ENSG00000106049	56.6765	-0.59778	0.3024	-1.97679	0.0480653	0.237681
THOC5	ENSG00000100296	37.7505	0.6704	0.339287	1.97591	0.0481652	0.237976
CRIP2	ENSG00000182809	112.882	-0.632965	0.320668	-1.97389	0.0483938	0.238906
RAN	ENSG00000132341	1503.61	-0.426361	0.216049	-1.97344	0.0484452	0.238961
RAI14	ENSG00000039560	105.96	-0.575707	0.29201	-1.97153	0.0486631	0.239638
PGPEP1	ENSG00000130517	26.1992	1.06444	0.539844	1.97175	0.0486377	0.239638
LEPRE1	ENSG00000117385	39.9586	0.691139	0.350634	1.97111	0.0487112	0.239675
TONSL	ENSG00000160949	26.5309	0.782645	0.39788	1.96704	0.0491785	0.241703
FAM103A1	ENSG00000169612	73.1164	-0.569221	0.289413	-1.96681	0.0492048	0.241703
ALG3	ENSG00000214160	89.1487	-0.52627	0.26778	-1.96531	0.0493788	0.241797
RAB18	ENSG00000099246	70.6838	-0.655058	0.333389	-1.96484	0.0494324	0.241797
TRIAP1	ENSG00000170855	104.359	-0.478052	0.243275	-1.96507	0.0494064	0.241797
TMCO3	ENSG00000150403	65.2653	0.58043	0.295222	1.96608	0.0492896	0.241797
CTC-524C5.2	ENSG00000263272	23.6012	-0.751152	0.382165	-1.96551	0.0493547	0.241797
CRLS1	ENSG00000088766	91.1192	-0.46825	0.238352	-1.96453	0.0494686	0.241797
NDUFB4	ENSG00000065518	294.045	-0.465771	0.23726	-1.96312	0.0496321	0.242197
PDCD10	ENSG00000114209	54.0979	-0.572306	0.291528	-1.96313	0.0496316	0.242197
DEGS1	ENSG00000143753	76.3682	-0.574995	0.293005	-1.96241	0.0497147	0.242201
EMP3	ENSG00000142227	500.85	-0.47393	0.241463	-1.96274	0.049676	0.242201
CWC27	ENSG00000153015	50.7187	-0.575186	0.293417	-1.9603	0.0499602	0.243024
RP11-350J20.12	ENSG00000273132	21.7068	1.05039	0.536045	1.95951	0.0500526	0.243024
MED19	ENSG00000156603	46.242	-0.671254	0.342615	-1.95921	0.0500886	0.243024
TRPT1	ENSG00000149743	55.1833	-0.544459	0.277804	-1.95987	0.0500115	0.243024
ZFAND6	ENSG00000086666	73.5843	-0.550223	0.280724	-1.96002	0.0499939	0.243024
NEK7	ENSG00000151414	54.5933	-0.606396	0.31008	-1.95561	0.0505113	0.244699
PSME2	ENSG00000100911	363.213	-0.459564	0.235045	-1.95522	0.0505576	0.244699
RPN2	ENSG00000118705	173.903	-0.467622	0.239162	-1.95525	0.0505537	0.244699
ADRM1	ENSG00000130706	430.374	-0.373951	0.191353	-1.95425	0.0506716	0.244851
TMEM259	ENSG00000182087	82.0662	0.564531	0.288844	1.95445	0.0506479	0.244851
MAGOH	ENSG00000162385	101.227	-0.524982	0.268846	-1.95272	0.0508528	0.245327
HIATL1	ENSG00000148110	29.361	0.755089	0.386656	1.95287	0.0508349	0.245327
CLU	ENSG00000120885	61.9123	0.755202	0.386957	1.95164	0.0509807	0.24571
KDELR1	ENSG00000105438	113.904	-0.442053	0.226537	-1.95135	0.0510152	0.24571
TMEM60	ENSG00000135211	41.6495	-0.684078	0.350766	-1.95024	0.0511479	0.246149
PSMB2	ENSG00000126067	409.454	-0.431277	0.221228	-1.94947	0.0512399	0.246192
PRPF31	ENSG00000105618	89.5602	-0.480448	0.246416	-1.94974	0.0512069	0.246192
FAM58A	ENSG00000147382	75.4112	-0.489086	0.250979	-1.94871	0.0513298	0.246225
SRCAP	ENSG00000080603	34.6164	0.680824	0.349324	1.94898	0.0512981	0.246225
TP53RK	ENSG00000172315	54.51	-0.60966	0.312934	-1.94821	0.0513899	0.246314
EMG1	ENSG00000126749	223.129	-0.430797	0.221168	-1.94783	0.051435	0.246331
COL12A1	ENSG00000111799	30.0597	0.7134	0.36643	1.94689	0.0515474	0.24667
MLF2	ENSG00000089693	376.939	-0.353315	0.181533	-1.94628	0.0516206	0.246821
ARPC3	ENSG00000111229	528.374	-0.531248	0.273165	-1.94479	0.0518002	0.247282
TPST2	ENSG00000128294	43.0884	-0.615554	0.316478	-1.94501	0.0517734	0.247282
PSMC1	ENSG00000100764	141.675	-0.481528	0.247648	-1.94441	0.0518464	0.247303
IKBKB	ENSG00000104365	24.0772	0.755039	0.38897	1.94112	0.0522432	0.24771
CDCA5	ENSG00000146670	111.052	0.512528	0.264062	1.94094	0.052266	0.24771
DERA	ENSG00000023697	136.338	-0.455016	0.234305	-1.94198	0.0521396	0.24771
MED21	ENSG00000152944	58.4086	-0.65549	0.337373	-1.94292	0.0520253	0.24771
TRIM16	ENSG00000221926	42.0282	0.629646	0.3243	1.94155	0.0521916	0.24771
GIT1	ENSG00000108262	38.0571	0.691598	0.356123	1.94202	0.052135	0.24771
POLRMT	ENSG00000099821	22.255	0.857134	0.441106	1.94315	0.0519982	0.24771
LIF	ENSG00000128342	121.07	0.847168	0.436457	1.94101	0.0522569	0.24771
MAZ	ENSG00000103495	157.038	0.4802	0.247777	1.93803	0.0526194	0.249186
C1orf233	ENSG00000228594	23.2599	-0.831994	0.429634	-1.93652	0.0528041	0.249662
DBN1	ENSG00000113758	37.3122	-0.864709	0.446526	-1.93653	0.0528034	0.249662
FADS3	ENSG00000221968	45.7386	-0.672428	0.347378	-1.93573	0.0529013	0.249922
KCTD17	ENSG00000100379	24.5096	0.752029	0.388681	1.93482	0.0530119	0.250245
DUSP1	ENSG00000120129	67.9395	-0.52167	0.269746	-1.93393	0.0531218	0.250287
TRIM8	ENSG00000171206	63.42	0.656538	0.339433	1.93422	0.0530858	0.250287
KLF16	ENSG00000129911	27.269	0.738184	0.381743	1.93372	0.0531474	0.250287
BAG3	ENSG00000151929	76.1594	0.561298	0.290452	1.9325	0.0532979	0.250796
OPN3	ENSG00000054277	42.7722	-0.686785	0.355532	-1.93171	0.0533953	0.251055
MLTK	ENSG00000091436	89.768	0.455017	0.235879	1.92902	0.0537282	0.25242
TACC2	ENSG00000138162	34.1302	0.944248	0.490085	1.9267	0.0540169	0.253576
PSMC3	ENSG00000165916	222.495	-0.562281	0.291954	-1.92592	0.0541145	0.253812
WDFY2	ENSG00000139668	24.0426	0.733895	0.381123	1.92561	0.0541528	0.253812
STARD3NL	ENSG00000010270	77.8797	-0.51997	0.270078	-1.92526	0.0541969	0.253818
UQCRC1	ENSG00000010256	239.841	-0.44572	0.231624	-1.92433	0.0543137	0.254145
SLC35C2	ENSG00000080189	70.8777	0.581733	0.302354	1.92402	0.0543525	0.254145
THEM4	ENSG00000159445	25.0937	0.878492	0.456906	1.9227	0.0545182	0.254411
INTS1	ENSG00000164880	45.4856	0.819944	0.426531	1.92235	0.0545614	0.254411
VDAC2	ENSG00000165637	503.981	-0.512901	0.26674	-1.92285	0.0544987	0.254411
PDIA3	ENSG00000167004	198.393	-0.758444	0.394572	-1.9222	0.054581	0.254411
MORN2	ENSG00000188010	49.4854	-0.66481	0.346418	-1.9191	0.0549722	0.255414
DCUN1D4	ENSG00000109184	23.9716	-0.737683	0.384324	-1.91943	0.0549303	0.255414
DENND5A	ENSG00000184014	26.6739	0.743313	0.387319	1.91912	0.0549687	0.255414
MPRIP	ENSG00000133030	81.0326	0.497803	0.259437	1.91878	0.0550117	0.255414
PSMB3	ENSG00000108294	629.78	-0.474965	0.2474	-1.91983	0.0548798	0.255414
PPP1CA	ENSG00000172531	317.909	-0.405379	0.211308	-1.91843	0.0550564	0.255422
SPTAN1	ENSG00000197694	75.0704	0.491056	0.256137	1.91716	0.0552172	0.255768
NGDN	ENSG00000129460	33.8997	-0.662598	0.345567	-1.91742	0.0551846	0.255768
DHRS7B	ENSG00000109016	32.1016	-0.697629	0.363976	-1.91669	0.0552774	0.255847
REEP3	ENSG00000165476	75.4672	-0.544114	0.28396	-1.91617	0.0553439	0.255955
SNAPC1	ENSG00000023608	35.829	-1.03511	0.540358	-1.9156	0.0554164	0.25609
PRPF4	ENSG00000136875	53.7958	0.564053	0.294559	1.91491	0.0555045	0.256209
TRABD	ENSG00000170638	51.4166	0.56362	0.294362	1.91472	0.0555286	0.256209
NPLOC4	ENSG00000182446	85.8225	0.624249	0.326133	1.91409	0.0556081	0.256377
AGPAT5	ENSG00000155189	36.649	-0.609965	0.318911	-1.91265	0.0557931	0.256824
RP11-195F19.5	ENSG00000187186	23.1813	0.767551	0.401235	1.91297	0.0557516	0.256824
BAMBI	ENSG00000095739	30.6	-0.704576	0.36844	-1.91232	0.055835	0.256824
SDHA	ENSG00000073578	98.6555	0.436811	0.228557	1.91117	0.0559826	0.256905
PAIP1	ENSG00000172239	85.8555	-0.462841	0.242147	-1.91141	0.0559522	0.256905
NUDT15	ENSG00000136159	44.4203	-0.66556	0.348182	-1.91153	0.0559365	0.256905
DDAH1	ENSG00000153904	96.5373	-0.556902	0.291487	-1.91055	0.0560623	0.257071
ARPC5	ENSG00000162704	567.146	-0.457313	0.239732	-1.9076	0.0564427	0.258067
NIFK	ENSG00000155438	67.768	-0.603942	0.316578	-1.90772	0.0564273	0.258067
CAMLG	ENSG00000164615	63.8257	-0.595354	0.311987	-1.90826	0.0563574	0.258067
RPS6KA2	ENSG00000071242	31.1051	0.675045	0.353949	1.90718	0.0564971	0.258067
TACC1	ENSG00000147526	61.77	0.5378	0.281981	1.90722	0.0564921	0.258067
PON2	ENSG00000105854	58.8992	-0.533931	0.280034	-1.90667	0.0565639	0.258173
SERF2	ENSG00000140264	2216.61	0.320018	0.16793	1.90567	0.0566935	0.258566
C8orf76	ENSG00000189376	21.4809	-0.739164	0.387991	-1.90511	0.0567659	0.258697
HNRNPU	ENSG00000153187	287.552	-0.390218	0.205051	-1.90303	0.0570365	0.259531
GNS	ENSG00000135677	43.5102	0.570519	0.299791	1.90306	0.0570332	0.259531
LYRM7	ENSG00000186687	25.6637	-0.731038	0.384237	-1.90257	0.0570968	0.259607
OTUB1	ENSG00000167770	72.9689	-0.599805	0.31534	-1.90209	0.0571593	0.259692
ATP5L	ENSG00000167283	724.141	-0.385112	0.202562	-1.90121	0.0572751	0.259717
YWHAE	ENSG00000108953	438.93	-0.368172	0.193618	-1.90154	0.0572318	0.259717
TXNDC17	ENSG00000129235	400.766	-0.492361	0.258995	-1.90104	0.0572963	0.259717
TFAM	ENSG00000108064	135.203	-0.424244	0.223239	-1.9004	0.057381	0.259902
STAMBP	ENSG00000124356	45.1494	-0.597913	0.314888	-1.89881	0.0575895	0.260647
ZMYND8	ENSG00000101040	50.6829	0.644197	0.339468	1.89767	0.0577398	0.261128
PAK1IP1	ENSG00000111845	67.115	-0.64968	0.342498	-1.89689	0.0578431	0.261197
HSBP1	ENSG00000230989	691.083	-0.435027	0.229298	-1.89721	0.0578	0.261197
PPME1	ENSG00000214517	40.2795	-0.75978	0.400641	-1.89641	0.0579055	0.261224
SMIM11	ENSG00000205670	88.8728	-0.532037	0.280585	-1.89617	0.0579371	0.261224
THG1L	ENSG00000113272	23.9202	-0.742336	0.39158	-1.89574	0.0579939	0.261281
THOC3	ENSG00000051596	64.1587	-0.591173	0.312131	-1.89399	0.0582262	0.261731
CCDC107	ENSG00000159884	108.739	0.457209	0.241341	1.89445	0.0581655	0.261731
ARL1	ENSG00000120805	80.0024	-0.572495	0.302241	-1.89417	0.0582029	0.261731
PHTF2	ENSG00000006576	22.424	-0.765239	0.404231	-1.89307	0.0583481	0.26208
STMN1	ENSG00000117632	994.603	-0.644978	0.340952	-1.8917	0.058531	0.262703
MGAT5	ENSG00000152127	23.8211	0.76129	0.4027	1.89046	0.0586963	0.263134
SLBP	ENSG00000163950	214.992	-0.492417	0.260495	-1.89031	0.0587159	0.263134
SLC43A3	ENSG00000134802	82.3723	0.464016	0.245524	1.8899	0.0587711	0.263183
PPP1R16A	ENSG00000160972	42.6537	0.771323	0.408247	1.88935	0.0588447	0.263313
NINJ1	ENSG00000131669	162.196	0.616185	0.326321	1.88828	0.0589884	0.263757
MRPL16	ENSG00000166902	103.849	-0.519934	0.275847	-1.88486	0.0594482	0.265413
MPHOSPH6	ENSG00000135698	92.7599	-0.496039	0.263169	-1.88487	0.0594475	0.265413
TAF13	ENSG00000197780	25.8819	0.741734	0.393775	1.88365	0.0596122	0.265745
ASPH	ENSG00000198363	367.496	0.474042	0.251628	1.8839	0.0595787	0.265745
AGBL5	ENSG00000084693	27.8629	0.710576	0.377613	1.88176	0.0598692	0.266588
ADK	ENSG00000156110	131.219	-0.542954	0.288561	-1.88159	0.0598913	0.266588
RPS18	ENSG00000231500	11680.9	0.356177	0.18933	1.88125	0.0599381	0.266597
C4orf27	ENSG00000056050	46.879	-0.65639	0.349072	-1.88038	0.0600559	0.266701
MET	ENSG00000105976	69.0373	0.554553	0.294866	1.8807	0.0600132	0.266701
KCNMA1	ENSG00000156113	478.307	-0.392051	0.208528	-1.88008	0.0600966	0.266701
TBCD	ENSG00000141556	31.2068	0.6462	0.34383	1.87942	0.0601874	0.266904
DYNLRB1	ENSG00000125971	375.377	-0.388805	0.207047	-1.87786	0.060401	0.267651
NDUFAF4	ENSG00000123545	64.4151	-0.58092	0.309517	-1.87686	0.0605376	0.268056
ZDHHC4	ENSG00000136247	60.057	-0.639982	0.341197	-1.8757	0.0606969	0.26839
CASC3	ENSG00000108349	36.7966	0.665255	0.35468	1.87565	0.0607036	0.26839
ABL2	ENSG00000143322	87.1731	0.700202	0.37345	1.87496	0.0607986	0.268482
F2R	ENSG00000181104	36.493	0.701832	0.374343	1.87484	0.060815	0.268482
UBB	ENSG00000170315	1622.51	-0.413732	0.220915	-1.87281	0.061094	0.269313
POP4	ENSG00000105171	80.579	-0.58268	0.311073	-1.87313	0.0610503	0.269313
LRPAP1	ENSG00000163956	101.375	-0.446394	0.238415	-1.87234	0.0611601	0.269404
PABPC4	ENSG00000090621	169.479	0.434617	0.232179	1.8719	0.0612203	0.269469
REXO2	ENSG00000076043	388.785	-0.596355	0.318767	-1.87082	0.0613707	0.269931
SH3BP4	ENSG00000130147	53.2352	0.533391	0.285233	1.87002	0.0614812	0.270016
ENY2	ENSG00000120533	306.654	-0.490943	0.262528	-1.87006	0.061476	0.270016
ELOVL5	ENSG00000012660	60.5687	0.525198	0.280968	1.86925	0.0615885	0.270152
MED16	ENSG00000175221	28.452	0.660468	0.353356	1.86913	0.0616048	0.270152
KDELR3	ENSG00000100196	73.2559	-0.578078	0.309329	-1.86881	0.0616488	0.270152
COX6B1	ENSG00000126267	671.812	-0.443299	0.237274	-1.8683	0.06172	0.270264
CD3EAP	ENSG00000117877	60.4009	-0.713143	0.382581	-1.86403	0.0623172	0.272678
SH2D4A	ENSG00000104611	65.7283	0.515603	0.276827	1.86255	0.0625258	0.273157
RFK	ENSG00000135002	75.9138	0.474991	0.25506	1.86227	0.062565	0.273157
ITFG3_ENSG00000167930	ENSG00000167930	55.1132	0.539908	0.289907	1.86235	0.0625543	0.273157
SAR1A	ENSG00000079332	115.058	-0.518488	0.278581	-1.86118	0.0627191	0.273629
SLC25A46	ENSG00000164209	26.0154	-0.734393	0.39506	-1.85894	0.0630357	0.274808
CHST3	ENSG00000122863	22.6501	0.882603	0.474943	1.85834	0.0631213	0.274979
SMIM10	ENSG00000184785	53.1424	-0.587232	0.316058	-1.85799	0.063171	0.274993
XPO6	ENSG00000169180	74.5849	0.507716	0.273418	1.85693	0.0633217	0.275447
MDC1	ENSG00000137337	22.921	0.74187	0.39965	1.8563	0.0634113	0.275635
ASL	ENSG00000126522	32.4027	-0.698474	0.376423	-1.85556	0.0635169	0.275891
AHCYL1	ENSG00000168710	69.3114	0.485042	0.261594	1.85418	0.0637134	0.276028
TAPBP	ENSG00000231925	99.369	0.4932	0.265984	1.85425	0.0637037	0.276028
CREB3L2	ENSG00000182158	33.1905	0.620599	0.334769	1.85382	0.0637655	0.276028
NID2	ENSG00000087303	53.1593	0.566701	0.305616	1.85429	0.0636978	0.276028
PPIL2	ENSG00000100023	21.9271	0.795459	0.429118	1.85371	0.0637811	0.276028
ATP5B	ENSG00000110955	345.265	-0.460239	0.248377	-1.85298	0.0638847	0.276275
CD27-AS1	ENSG00000215039	32.7295	0.640927	0.345971	1.85255	0.0639474	0.276344
CEP170	ENSG00000143702	55.8523	-0.551024	0.297543	-1.85191	0.0640384	0.276359
GCAT	ENSG00000100116	34.4738	-0.754449	0.407398	-1.85187	0.0640442	0.276359
PFKP	ENSG00000067057	108.745	0.464048	0.250672	1.85122	0.0641382	0.276363
LMNB2	ENSG00000176619	80.978	0.53158	0.287128	1.85137	0.0641168	0.276363
SEC23IP	ENSG00000107651	23.7598	-0.725543	0.392195	-1.84995	0.0643202	0.276745
MLST8	ENSG00000167965	81.2811	0.481719	0.26039	1.84999	0.0643155	0.276745
GSTP1	ENSG00000084207	919.237	-0.481912	0.26058	-1.84938	0.0644026	0.276899
DUSP12	ENSG00000081721	45.8905	-0.576082	0.31173	-1.84801	0.0646003	0.277503
DBF4	ENSG00000006634	57.7292	-0.491572	0.26613	-1.84711	0.0647305	0.277503
GREM1	ENSG00000166923	49.156	-0.569389	0.308216	-1.84737	0.0646934	0.277503
TSPO	ENSG00000100300	1031.04	0.421983	0.228376	1.84775	0.0646384	0.277503
EIF1B	ENSG00000114784	57.6946	-0.72939	0.39506	-1.84628	0.064852	0.277823
PTK2	ENSG00000169398	81.2545	0.473044	0.256335	1.84541	0.0649779	0.278138
DIS3	ENSG00000083520	54.0139	0.616882	0.334448	1.84448	0.065113	0.278138
FAM219B	ENSG00000178761	29.0488	0.649609	0.352071	1.8451	0.0650223	0.278138
DHX38	ENSG00000140829	50.5739	0.566487	0.307124	1.84449	0.0651122	0.278138
PGRMC1	ENSG00000101856	114.904	-0.596972	0.32391	-1.84302	0.0653265	0.278834
WBP4	ENSG00000120688	33.3883	-0.791047	0.429283	-1.84272	0.0653702	0.278834
RBBP7	ENSG00000102054	170.313	-0.453006	0.245882	-1.84237	0.0654205	0.278848
RPF1	ENSG00000117133	56.468	-0.612299	0.332488	-1.84157	0.0655386	0.278951
EHD1	ENSG00000110047	57.0558	0.602615	0.327222	1.84161	0.065532	0.278951
STIM2	ENSG00000109689	25.7669	0.67263	0.365496	1.84032	0.0657208	0.279263
SRA1	ENSG00000213523	209.498	-0.384557	0.20901	-1.8399	0.0657833	0.279263
APEX2	ENSG00000169188	67.2589	0.490252	0.266603	1.83888	0.0659325	0.279263
RSU1	ENSG00000148484	85.783	-0.561549	0.305346	-1.83906	0.0659067	0.279263
CSNK1D	ENSG00000141551	89.056	0.434912	0.236517	1.83882	0.0659417	0.279263
NFIC	ENSG00000141905	182.803	0.450725	0.244875	1.84063	0.0656754	0.279263
ILF3	ENSG00000129351	211.585	0.362479	0.197111	1.83896	0.0659214	0.279263
SSBP3	ENSG00000157216	23.1412	0.737221	0.401102	1.83799	0.0660644	0.279282
FYTTD1	ENSG00000122068	46.8738	-0.535476	0.291325	-1.83807	0.0660522	0.279282
ZC3HAV1	ENSG00000105939	23.843	0.738428	0.401904	1.83732	0.066162	0.279282
MVD	ENSG00000167508	70.5498	0.497711	0.270834	1.8377	0.0661072	0.279282
MAPK1	ENSG00000100030	54.0233	0.563047	0.306472	1.83719	0.0661816	0.279282
SMC3	ENSG00000108055	279.328	-0.434123	0.236421	-1.83622	0.0663244	0.279685
AZI2	ENSG00000163512	43.1939	-0.593026	0.323019	-1.83589	0.0663744	0.279697
POMGNT1	ENSG00000085998	41.3187	0.586774	0.319753	1.83509	0.0664927	0.279997
SMARCA1	ENSG00000102038	25.0614	-0.766414	0.417922	-1.83387	0.0666733	0.280382
TOR1A	ENSG00000136827	82.6553	-0.444579	0.242432	-1.83383	0.0666787	0.280382
PTBP1	ENSG00000011304	206.426	0.481917	0.262843	1.83348	0.0667314	0.280404
FUOM	ENSG00000148803	125.275	-0.419084	0.22865	-1.83286	0.0668234	0.280592
GTPBP1	ENSG00000100226	29.3066	0.767743	0.419223	1.83135	0.0670487	0.281339
ZNF469	ENSG00000225614	33.1532	-0.925391	0.505502	-1.83064	0.0671548	0.281585
IFRD1	ENSG00000006652	41.9516	-0.590861	0.322871	-1.83002	0.0672464	0.28177
TFRC	ENSG00000072274	102.089	0.43531	0.237924	1.82962	0.0673074	0.281826
NCLN	ENSG00000125912	74.7241	0.576824	0.315614	1.82762	0.0676061	0.282877
MCM3	ENSG00000112118	123.541	0.453844	0.248371	1.82728	0.0676572	0.282891
GTPBP3	ENSG00000130299	30.1713	0.661932	0.362391	1.82657	0.0677649	0.283142
MAGOHB	ENSG00000111196	128.068	-0.551342	0.301912	-1.82617	0.0678247	0.283192
SPAG9	ENSG00000008294	89.5337	0.49234	0.269665	1.82575	0.0678884	0.283258
TIMM9	ENSG00000100575	37.8951	-0.600255	0.328898	-1.82505	0.0679934	0.283298
SCAND1	ENSG00000171222	415.921	-0.340943	0.186782	-1.82535	0.067948	0.283298
RNASEH2C	ENSG00000172922	236.838	-0.367775	0.201571	-1.82454	0.0680699	0.283418
NCBP2	ENSG00000114503	94.4907	-0.422605	0.231733	-1.82367	0.0682016	0.283633
C16orf87	ENSG00000155330	39.0598	-0.672179	0.368626	-1.82347	0.0682319	0.283633
ETS2	ENSG00000157557	23.3869	0.789443	0.432986	1.82325	0.0682652	0.283633
KANK2	ENSG00000197256	70.4131	0.483199	0.265124	1.82254	0.0683729	0.283882
LPIN2	ENSG00000101577	35.9171	0.650117	0.356922	1.82146	0.0685377	0.284367
BAG1	ENSG00000107262	93.4521	0.428854	0.235671	1.81971	0.0688028	0.285267
SLC38A10	ENSG00000157637	53.6726	0.530971	0.291951	1.8187	0.0689573	0.285574
GAMT	ENSG00000130005	219.447	0.376951	0.207276	1.8186	0.0689731	0.285574
RNPEPL1	ENSG00000142327	26.5176	0.707294	0.389138	1.81759	0.0691263	0.286008
RPL37A	ENSG00000197756	3309.4	0.527448	0.2903	1.81691	0.0692309	0.286241
RIOK1	ENSG00000124784	21.8723	-0.769123	0.42367	-1.81538	0.0694654	0.286369
SURF4	ENSG00000148248	202.026	0.405267	0.223235	1.81543	0.0694585	0.286369
NUDT16L1	ENSG00000168101	36.2747	-0.580109	0.319599	-1.81511	0.0695068	0.286369
MAP3K3	ENSG00000198909	25.5053	0.738239	0.406711	1.81514	0.0695018	0.286369
DPF1	ENSG00000011332	21.6007	0.882735	0.486403	1.81482	0.0695516	0.286369
BCL2L12	ENSG00000126453	117.322	-0.426201	0.234742	-1.81562	0.069429	0.286369
MAP1B	ENSG00000131711	206.74	-0.383711	0.211547	-1.81383	0.0697037	0.286796
TMEM50A	ENSG00000183726	162.628	-0.445839	0.246141	-1.81131	0.0700923	0.28685
PIGC	ENSG00000135845	23.6936	-0.726321	0.400867	-1.81187	0.0700057	0.28685
TKT	ENSG00000163931	405.492	0.404714	0.223414	1.8115	0.0700632	0.28685
EXOC3	ENSG00000180104	40.4337	0.572062	0.315664	1.81225	0.0699475	0.28685
CTC-228N24.3	ENSG00000245937	47.4152	-0.515253	0.284539	-1.81083	0.070167	0.28685
SLC4A2	ENSG00000164889	51.4319	0.533503	0.294495	1.81159	0.0700501	0.28685
RP11-139H15.1	ENSG00000225973	35.829	-0.603432	0.332954	-1.81236	0.0699307	0.28685
TEFM	ENSG00000172171	21.6165	-0.729835	0.403087	-1.81061	0.0702007	0.28685
CTC-503J8.6	ENSG00000267427	53.2782	0.562545	0.310588	1.81123	0.070106	0.28685
UBE2S	ENSG00000108106	581.131	-0.386649	0.213327	-1.81247	0.0699137	0.28685
PCCB	ENSG00000114054	25.3033	-0.701695	0.387734	-1.80973	0.0703374	0.287211
FBLN1	ENSG00000077942	124.138	0.525058	0.290221	1.80917	0.0704249	0.287371
SELK	ENSG00000113811	185.969	-0.546524	0.30228	-1.80801	0.0706055	0.287909
WRB	ENSG00000182093	49.9186	-0.556506	0.307921	-1.8073	0.0707152	0.288158
CLSTN1	ENSG00000171603	103.034	0.466977	0.258532	1.80626	0.0708772	0.28827
GLRX2	ENSG00000023572	115.55	-0.578217	0.320058	-1.8066	0.0708247	0.28827
TMEM99	ENSG00000167920	62.3242	0.541548	0.299829	1.80619	0.0708885	0.28827
NDC1	ENSG00000058804	37.8531	0.568206	0.314734	1.80535	0.0710194	0.288605
PAPSS2	ENSG00000198682	39.6918	0.679455	0.37664	1.80399	0.0712328	0.289156
LIMD2	ENSG00000136490	94.7764	-0.647284	0.358832	-1.80386	0.0712525	0.289156
MMP2	ENSG00000087245	77.2675	0.645449	0.357958	1.80314	0.0713659	0.28922
EXOSC6	ENSG00000223496	25.7569	-0.655555	0.363533	-1.80329	0.0713429	0.28922
NUPL2	ENSG00000136243	39.0036	-0.614431	0.341171	-1.80095	0.0717112	0.29042
FAM134A	ENSG00000144567	31.1477	0.654095	0.363362	1.80012	0.0718417	0.290751
GAK	ENSG00000178950	35.9627	0.589619	0.327696	1.79928	0.0719739	0.290888
CENPH	ENSG00000153044	101.011	-0.403517	0.224238	-1.7995	0.0719394	0.290888
KPNA6	ENSG00000025800	77.2027	0.506773	0.281905	1.79767	0.0722292	0.291722
NUDT14	ENSG00000183828	26.0281	-0.757227	0.421307	-1.79733	0.0722834	0.291742
CCDC130	ENSG00000104957	21.8442	0.744653	0.414404	1.79692	0.0723476	0.291802
LASP1	ENSG00000002834	110.275	0.429675	0.239177	1.79647	0.0724198	0.291895
LYPD1	ENSG00000150551	22.1904	0.707162	0.393753	1.79595	0.0725019	0.292009
MEPCE	ENSG00000146834	54.6522	0.602921	0.335763	1.79567	0.0725467	0.292009
ZNF330	ENSG00000109445	30.9656	-0.650038	0.362503	-1.79319	0.0729421	0.293004
ITGB1	ENSG00000150093	394.656	0.32706	0.182362	1.79346	0.0728988	0.293004
ANXA2	ENSG00000182718	1557.08	-0.496711	0.276974	-1.79335	0.0729165	0.293004
SRI	ENSG00000075142	207.733	-0.535938	0.298949	-1.79274	0.0730145	0.293096
SRPK1	ENSG00000096063	147.572	-0.397584	0.222066	-1.79038	0.0733923	0.29423
PBDC1	ENSG00000102390	108.325	-0.470357	0.262717	-1.79036	0.0733961	0.29423
APOA1BP	ENSG00000163382	128.806	-0.490488	0.274919	-1.78412	0.0744041	0.294329
CDC73	ENSG00000134371	40.1051	-0.597511	0.334414	-1.78674	0.0739793	0.294329
AKT3	ENSG00000117020	37.9258	-0.598406	0.334646	-1.78818	0.0737475	0.294329
GPATCH11	ENSG00000152133	29.894	-0.671641	0.375387	-1.7892	0.0735831	0.294329
COX7A2L	ENSG00000115944	419.168	-0.41831	0.234348	-1.78499	0.0742625	0.294329
STEAP3	ENSG00000115107	25.3422	0.662047	0.370977	1.7846	0.0743258	0.294329
NME6	ENSG00000172113	40.5468	-0.674775	0.378529	-1.78263	0.0746473	0.294329
COMMD2	ENSG00000114744	92.92	-0.405287	0.227084	-1.78474	0.0743033	0.294329
MED10	ENSG00000133398	191.633	-0.430981	0.241648	-1.78351	0.0745038	0.294329
VCAN	ENSG00000038427	37.6515	0.700554	0.392709	1.7839	0.0744397	0.294329
DDX46	ENSG00000145833	279.602	-0.386137	0.215897	-1.78853	0.0736906	0.294329
TTC1	ENSG00000113312	98.8884	-0.548975	0.30784	-1.78331	0.0745352	0.294329
DDX56	ENSG00000136271	63.9692	-0.479691	0.269106	-1.78254	0.074662	0.294329
TMEM248	ENSG00000106609	45.7375	-0.551452	0.308795	-1.78582	0.0741284	0.294329
THAP1	ENSG00000131931	23.2863	-0.719162	0.402369	-1.78732	0.0738855	0.294329
DPM2	ENSG00000136908	243.578	0.383526	0.214824	1.78531	0.0742117	0.294329
LARP4B	ENSG00000107929	47.6252	0.560888	0.314268	1.78475	0.0743025	0.294329
PDDC1	ENSG00000177225	50.5536	0.719259	0.402493	1.78701	0.0739361	0.294329
HNRNPC	ENSG00000092199	335.432	-0.389132	0.218242	-1.78303	0.0745817	0.294329
RSL24D1	ENSG00000137876	108.273	-0.656007	0.367639	-1.78438	0.0743622	0.294329
VPS53	ENSG00000141252	22.4808	0.76601	0.429063	1.78531	0.0742109	0.294329
PSMB6	ENSG00000142507	773.583	-0.423399	0.23752	-1.78258	0.074654	0.294329
BRCA1	ENSG00000012048	64.4176	0.514257	0.287545	1.78844	0.0737056	0.294329
UTP18	ENSG00000011260	61.8879	-0.618973	0.3466	-1.78584	0.0741249	0.294329
MXRA7	ENSG00000182534	44.5628	-0.573647	0.321283	-1.78549	0.0741821	0.294329
GNPAT	ENSG00000116906	27.4515	-0.680055	0.381665	-1.78181	0.0747798	0.294523
B3GNT9	ENSG00000237172	26.5574	0.743988	0.41759	1.78162	0.0748106	0.294523
LRRC47	ENSG00000130764	38.5977	0.562437	0.315898	1.78044	0.0750037	0.294549
UBR4	ENSG00000127481	62.7422	0.466949	0.262277	1.78037	0.0750158	0.294549
TMED5	ENSG00000117500	43.1351	-0.617446	0.346693	-1.78096	0.0749189	0.294549
MPHOSPH9	ENSG00000051825	35.5802	0.58957	0.331011	1.78112	0.0748933	0.294549
ID3	ENSG00000117318	1332.41	-0.551138	0.309997	-1.77788	0.0754229	0.295719
CITED2	ENSG00000164442	202.131	-0.589398	0.331619	-1.77733	0.0755134	0.295719
EIF3J	ENSG00000104131	130.067	-0.680404	0.382762	-1.77761	0.0754674	0.295719
GALK1	ENSG00000108479	39.6308	-0.585291	0.329223	-1.77779	0.0754377	0.295719
H3F3A	ENSG00000163041	1037.6	-0.478778	0.269515	-1.77644	0.0756599	0.295902
RHOBTB3	ENSG00000164292	166.896	0.470138	0.264647	1.77647	0.0756555	0.295902
SUB1	ENSG00000113387	434.383	-0.506291	0.285209	-1.77516	0.0758714	0.296338
DNAJC9	ENSG00000213551	384.965	-0.36052	0.203067	-1.77537	0.0758365	0.296338
SMYD2	ENSG00000143499	40.9001	-0.600239	0.338669	-1.77235	0.0763369	0.297562
FAM168B	ENSG00000152102	78.3362	0.530045	0.299113	1.77206	0.0763853	0.297562
TRMT10C	ENSG00000174173	44.9793	-0.539141	0.304094	-1.77294	0.0762382	0.297562
GARS	ENSG00000106105	112.752	-0.490189	0.276545	-1.77255	0.0763035	0.297562
PFDN2	ENSG00000143256	473.662	-0.482228	0.272214	-1.7715	0.0764779	0.297726
CDK10	ENSG00000185324	48.29	0.572481	0.323372	1.77035	0.0766691	0.298275
ARL6IP6	ENSG00000177917	76.5134	-0.447637	0.252903	-1.77	0.0767277	0.298307
CALM1	ENSG00000198668	553.48	-0.467726	0.264613	-1.76759	0.0771301	0.299675
LACTB2	ENSG00000147592	62.7639	-0.536328	0.303499	-1.76715	0.077203	0.299762
DAP	ENSG00000112977	138.151	0.432983	0.24513	1.76634	0.0773393	0.300095
ZNF667-AS1	ENSG00000166770	33.0504	-0.80479	0.45576	-1.76582	0.0774263	0.300236
ECE1	ENSG00000117298	79.7581	0.477995	0.270758	1.76539	0.0774977	0.300316
NUDC	ENSG00000090273	481.097	-0.399739	0.226474	-1.76505	0.0775547	0.300341
MAD1L1	ENSG00000002822	43.1639	0.702236	0.398225	1.76341	0.0778307	0.301213
FKBP1A	ENSG00000088832	648.613	-0.301125	0.170809	-1.76293	0.077912	0.301331
CDC42EP3	ENSG00000163171	94.5737	-0.511512	0.290245	-1.76235	0.0780105	0.301515
MYO1C	ENSG00000197879	123.339	0.500098	0.283875	1.76168	0.0781228	0.301753
CCT3	ENSG00000163468	305.734	-0.422813	0.240228	-1.76005	0.0783996	0.302611
ACAA1	ENSG00000060971	32.9558	-0.627967	0.356907	-1.75947	0.0784982	0.302611
ARFGAP3	ENSG00000242247	76.7382	0.445853	0.253376	1.75965	0.0784676	0.302611
ATP1B1	ENSG00000143153	48.884	-0.498857	0.283602	-1.75901	0.0785764	0.302716
NDUFV3	ENSG00000160194	50.8498	-0.500134	0.284423	-1.75842	0.0786763	0.302904
RC3H2	ENSG00000056586	50.3945	0.606965	0.345565	1.75644	0.0790131	0.304003
COA5	ENSG00000183513	38.5621	0.605446	0.344891	1.75547	0.079179	0.304378
CTDSP1	ENSG00000144579	26.7149	0.69626	0.396736	1.75497	0.0792645	0.304378
NPRL3	ENSG00000103148	42.2856	0.572753	0.326312	1.75523	0.0792195	0.304378
NCAPD2	ENSG00000010292	63.8925	0.461595	0.263118	1.75432	0.079375	0.304447
SAP18	ENSG00000150459	337.841	-0.430266	0.245311	-1.75396	0.0794366	0.304447
ANKRD9	ENSG00000156381	52.5739	0.556477	0.317218	1.75424	0.0793887	0.304447
MTCH2	ENSG00000109919	162.097	-0.434697	0.247975	-1.75299	0.0796039	0.304891
C12orf5	ENSG00000078237	36.6056	-0.708102	0.404129	-1.75217	0.0797448	0.305088
DDX54	ENSG00000123064	87.4057	0.478494	0.273099	1.75209	0.0797582	0.305088
IVD	ENSG00000128928	23.0109	0.663999	0.379069	1.75166	0.0798327	0.305176
NOM1	ENSG00000146909	38.6487	0.692208	0.395538	1.75004	0.0801109	0.305845
SNRPA1	ENSG00000131876	206.198	-0.422674	0.241497	-1.75023	0.0800791	0.305845
TIMM23	ENSG00000138297	66.2154	-0.504945	0.288765	-1.74864	0.0803532	0.306573
COPS8	ENSG00000198612	105.195	-0.538037	0.307874	-1.74759	0.0805355	0.306645
ATL3	ENSG00000184743	45.0678	-0.535549	0.306494	-1.74734	0.0805789	0.306645
AMDHD2	ENSG00000162066	38.9846	0.573986	0.328389	1.74789	0.0804837	0.306645
CTA-29F11.1	ENSG00000260708	23.4204	0.72205	0.413189	1.7475	0.08055	0.306645
STIL	ENSG00000123473	26.7132	0.771567	0.441708	1.74678	0.0806753	0.30671
RAB6A	ENSG00000175582	39.8699	-0.549179	0.31442	-1.74664	0.0806996	0.30671
DLST	ENSG00000119689	26.9622	0.630082	0.36096	1.74557	0.0808851	0.307218
PPP4R2	ENSG00000163605	59.4847	-0.516926	0.296277	-1.74474	0.0810305	0.307472
TIMM13	ENSG00000099800	885.516	-0.27005	0.154792	-1.74459	0.0810555	0.307472
SYDE1	ENSG00000105137	59.3522	0.52969	0.303672	1.74429	0.0811094	0.307479
GPN3	ENSG00000111231	101.937	-0.563965	0.324314	-1.73895	0.0820439	0.310625
PFAS	ENSG00000178921	25.1342	0.66342	0.381486	1.73904	0.0820272	0.310625
RNF4	ENSG00000063978	55.8815	0.540651	0.31112	1.73775	0.082254	0.311221
ACTR2	ENSG00000138071	129.633	-0.412442	0.237459	-1.7369	0.082405	0.311453
OPTN	ENSG00000123240	106.756	0.514871	0.296446	1.73681	0.0824203	0.311453
MALAT1	ENSG00000251562	5827.76	-0.42684	0.245939	-1.73555	0.0826433	0.312097
TRAF4	ENSG00000076604	74.8356	0.565665	0.326023	1.73505	0.0827322	0.312234
NDUFA6	ENSG00000184983	345.753	0.437033	0.252229	1.73269	0.0831517	0.313617
VGLL3	ENSG00000206538	39.1122	0.609052	0.351666	1.73191	0.0832901	0.31394
MCCC2	ENSG00000131844	23.1269	-0.657451	0.379991	-1.73018	0.0835989	0.314067
ESYT2	ENSG00000117868	47.4697	0.545584	0.315367	1.73	0.0836304	0.314067
GTPBP4	ENSG00000107937	125.014	-0.420984	0.243292	-1.73036	0.0835655	0.314067
CCT2	ENSG00000166226	289.003	-0.445214	0.257166	-1.73123	0.0834101	0.314067
APEX1	ENSG00000100823	126.358	-0.464635	0.268585	-1.72994	0.0836416	0.314067
DDX19A	ENSG00000168872	56.0067	0.47329	0.273534	1.73027	0.0835812	0.314067
WIZ	ENSG00000011451	36.1045	0.621731	0.359468	1.72959	0.083704	0.314102
SEMA5A	ENSG00000112902	26.3902	-1.69984	0.984238	-1.72706	0.0841568	0.315203
NIPSNAP3A	ENSG00000136783	31.9142	-0.733979	0.424868	-1.72755	0.0840693	0.315203
SSNA1	ENSG00000176101	383.597	0.326606	0.189086	1.72728	0.0841168	0.315203
UBXN1	ENSG00000162191	218.432	-0.474528	0.275064	-1.72516	0.0844991	0.316285
RBM22	ENSG00000086589	26.8183	-0.653043	0.378686	-1.7245	0.0846181	0.316331
TERF2IP	ENSG00000166848	82.4658	-0.487497	0.282678	-1.72456	0.0846061	0.316331
PRIM1	ENSG00000198056	54.9091	-0.71126	0.412549	-1.72406	0.0846964	0.316424
SPOCD1	ENSG00000134668	29.7911	0.963228	0.558835	1.72364	0.0847737	0.31649
PPIH	ENSG00000171960	59.1229	-0.461891	0.268016	-1.72337	0.0848208	0.31649
SPNS1	ENSG00000169682	55.3353	0.537172	0.311798	1.72282	0.0849205	0.316598
FLII	ENSG00000177731	48.7861	0.536452	0.311416	1.72262	0.0849567	0.316598
CCT5	ENSG00000150753	486.28	-0.454042	0.263641	-1.7222	0.0850332	0.316685
TLE4	ENSG00000106829	49.0027	-0.504287	0.292878	-1.72183	0.0851001	0.316735
SNRNP40	ENSG00000060688	84.1726	-0.539317	0.313411	-1.7208	0.0852874	0.316997
UBE2R2	ENSG00000107341	71.3175	0.492487	0.286237	1.72056	0.085331	0.316997
IKBIP	ENSG00000166130	115.877	-0.444369	0.258189	-1.7211	0.0852326	0.316997
TPD52	ENSG00000076554	61.3114	-0.581047	0.338589	-1.71608	0.086147	0.319828
STYX	ENSG00000198252	23.0059	-0.64918	0.378394	-1.71562	0.0862315	0.319941
NACA	ENSG00000196531	2169.12	-0.394309	0.230091	-1.71371	0.0865823	0.320561
PABPN1	ENSG00000100836	94.0448	0.468262	0.273272	1.71354	0.0866135	0.320561
MAP2K7	ENSG00000076984	40.022	0.567191	0.330939	1.71388	0.08655	0.320561
TOMM40	ENSG00000130204	193.212	-0.362429	0.21151	-1.71353	0.0866148	0.320561
CNP	ENSG00000173786	51.5101	0.491904	0.28715	1.71306	0.086702	0.320684
WDR1	ENSG00000071127	292.581	0.321419	0.187829	1.71123	0.087038	0.321706
ARHGDIB	ENSG00000111348	57.1467	1.43049	0.836068	1.71097	0.0870869	0.321706
DDX21	ENSG00000165732	212.291	-0.436421	0.255128	-1.71059	0.0871564	0.321762
HNRNPK	ENSG00000165119	373.277	-0.358813	0.209857	-1.7098	0.0873035	0.322105
PAFAH1B3	ENSG00000079462	268.28	-0.400386	0.234229	-1.70938	0.0873809	0.32219
PVR	ENSG00000073008	61.7774	-0.672534	0.393876	-1.70748	0.0877337	0.32329
SNRPG	ENSG00000143977	463.784	-0.382877	0.22433	-1.70676	0.087867	0.323468
KLHL7	ENSG00000122550	36.2447	-0.602193	0.352855	-1.70663	0.0878912	0.323468
EWSR1	ENSG00000182944	220.1	0.320629	0.188133	1.70427	0.088331	0.324885
BUB3	ENSG00000154473	348.757	-0.429794	0.252232	-1.70397	0.0883875	0.324891
HYAL2	ENSG00000068001	36.0226	-0.731902	0.429777	-1.70298	0.0885714	0.324982
ACAT1	ENSG00000075239	81.3276	-0.607049	0.356468	-1.70295	0.0885765	0.324982
DDT	ENSG00000099977	508	0.394736	0.231742	1.70334	0.0885047	0.324982
PARP4	ENSG00000102699	24.4324	0.657956	0.386512	1.70229	0.0887003	0.325235
DNER	ENSG00000187957	26.3725	0.619346	0.363981	1.70159	0.0888323	0.325435
SMARCA4	ENSG00000127616	116.952	0.451072	0.265115	1.70142	0.0888648	0.325435
CCDC12	ENSG00000160799	115.607	-0.423477	0.248997	-1.70073	0.0889934	0.325705
PPCDC	ENSG00000138621	29.7764	0.635356	0.373794	1.69975	0.0891781	0.32618
SFR1	ENSG00000156384	40.4551	0.675844	0.397915	1.69846	0.0894204	0.326864
ZBED1	ENSG00000214717	26.3985	0.684529	0.403164	1.69789	0.0895283	0.327057
NBL1	ENSG00000158747	73.3207	0.500673	0.295002	1.69719	0.0896613	0.327214
EXT1	ENSG00000182197	99.9543	0.44385	0.261537	1.69708	0.0896817	0.327214
STK24	ENSG00000102572	55.3837	0.485773	0.286353	1.69641	0.0898075	0.327472
ATG9A	ENSG00000198925	28.2719	0.640293	0.378049	1.69368	0.0903262	0.328756
COQ2	ENSG00000173085	36.4771	-0.537301	0.31723	-1.69373	0.0903167	0.328756
RDH11	ENSG00000072042	49.4786	-0.522509	0.308491	-1.69376	0.0903114	0.328756
ARHGEF10	ENSG00000104728	26.6472	0.6059	0.357908	1.69289	0.090476	0.328999
STK32C	ENSG00000165752	35.2481	0.632148	0.373445	1.69275	0.0905037	0.328999
METTL16	ENSG00000127804	25.2302	0.672874	0.397606	1.69231	0.0905861	0.329096
DNTTIP2	ENSG00000067334	69.8092	-0.514529	0.304239	-1.6912	0.0907987	0.329263
NAGK	ENSG00000124357	65.8665	-0.511958	0.302627	-1.69172	0.0907001	0.329263
DAD1	ENSG00000129562	310.84	-0.49195	0.290865	-1.69133	0.0907737	0.329263
CITED4	ENSG00000179862	114.966	0.520406	0.308129	1.68892	0.0912346	0.329871
P4HA2	ENSG00000072682	25.495	-0.704997	0.417277	-1.68952	0.0911201	0.329871
UBE2B	ENSG00000119048	129.124	-0.484059	0.286558	-1.68922	0.0911774	0.329871
CCHCR1	ENSG00000204536	40.5331	0.616103	0.364865	1.68858	0.0913	0.329871
ARPC5L	ENSG00000136950	386.665	0.290403	0.171953	1.68885	0.0912474	0.329871
PWP1	ENSG00000136045	88.8	-0.497453	0.294413	-1.68965	0.0910957	0.329871
SNRPC	ENSG00000124562	251.035	-0.407799	0.241791	-1.68657	0.0916856	0.33066
GUSB	ENSG00000169919	21.6991	-0.647846	0.38412	-1.68657	0.0916859	0.33066
GHITM	ENSG00000165678	391.784	-0.404819	0.239998	-1.68676	0.0916495	0.33066
GPKOW	ENSG00000068394	23.1557	-0.673803	0.399782	-1.68543	0.0919065	0.331254
TSNAX	ENSG00000116918	27.5223	-0.688285	0.408678	-1.68417	0.0921483	0.331354
FRG1	ENSG00000109536	47.6813	-0.534707	0.317519	-1.68402	0.0921788	0.331354
DCPS	ENSG00000110063	26.8138	-0.641965	0.381251	-1.68384	0.0922135	0.331354
FKBP3	ENSG00000100442	106.284	-0.494393	0.293539	-1.68425	0.0921338	0.331354
SH2B1	ENSG00000178188	22.4301	0.677084	0.401956	1.68447	0.0920901	0.331354
TRAPPC3	ENSG00000054116	170.1	-0.393533	0.23376	-1.68349	0.0922795	0.33139
RNF213	ENSG00000173821	66.8709	0.494674	0.293989	1.68263	0.0924468	0.33179
TPM3	ENSG00000143549	324.524	-0.352657	0.209736	-1.68143	0.092679	0.331846
FEZ2	ENSG00000171055	83.5119	-0.499584	0.297786	-1.67766	0.0934138	0.331846
RPL31	ENSG00000071082	1949.43	0.306193	0.182118	1.68129	0.092706	0.331846
CLDND1	ENSG00000080822	23.1009	-0.658555	0.392338	-1.67854	0.0932419	0.331846
GTPBP8	ENSG00000163607	42.0941	-0.600551	0.35739	-1.68038	0.0928835	0.331846
HNRNPD	ENSG00000138668	242.788	-0.357649	0.21315	-1.67792	0.0933625	0.331846
ARHGAP18	ENSG00000146376	187.392	-0.455038	0.270745	-1.68069	0.0928233	0.331846
PHF19	ENSG00000119403	282.166	0.327868	0.195196	1.67968	0.0930189	0.331846
TMEM138	ENSG00000149483	40.8674	-0.537218	0.319644	-1.68067	0.0928263	0.331846
DPAGT1	ENSG00000172269	21.3117	-0.754778	0.449687	-1.67845	0.0932586	0.331846
LDHB	ENSG00000111716	1440.21	-0.582218	0.346993	-1.6779	0.0933674	0.331846
ESD	ENSG00000139684	35.2712	-0.779072	0.463984	-1.67909	0.0931338	0.331846
BCAR1	ENSG00000050820	136.958	0.442083	0.262962	1.68117	0.0927301	0.331846
TIMP2	ENSG00000035862	123.199	0.386569	0.230265	1.6788	0.0931902	0.331846
ILF3-AS1	ENSG00000267100	35.3721	0.548998	0.326865	1.67958	0.0930381	0.331846
MPV17L2	ENSG00000254858	55.3286	-0.516655	0.307937	-1.6778	0.0933869	0.331846
FBL	ENSG00000105202	193.285	-0.402849	0.239484	-1.68215	0.0925389	0.331846
ATP5F1	ENSG00000116459	281.223	-0.482963	0.288065	-1.67658	0.0936249	0.332043
RFC4	ENSG00000163918	120.994	-0.480601	0.286667	-1.67651	0.0936375	0.332043
TFE3	ENSG00000068323	35.7023	0.56112	0.334615	1.67691	0.0935594	0.332043
INPP1	ENSG00000151689	37.4044	0.57906	0.345919	1.67397	0.094136	0.332419
NUP214	ENSG00000126883	44.8357	0.556926	0.332401	1.67547	0.0938426	0.332419
TUBGCP2	ENSG00000130640	100.635	0.400021	0.238762	1.6754	0.0938566	0.332419
RIN1	ENSG00000174791	23.2116	0.676682	0.404229	1.674	0.0941298	0.332419
MRPL28	ENSG00000086504	194.094	-0.401119	0.23959	-1.67419	0.0940935	0.332419
MON1B	ENSG00000103111	32.4411	0.616813	0.368368	1.67445	0.0940424	0.332419
RP11-1094M14.11	ENSG00000267321	43.9145	0.592846	0.354009	1.67467	0.0939996	0.332419
CD320	ENSG00000167775	316.721	-0.308115	0.184119	-1.67345	0.0942379	0.332581
MEAF6	ENSG00000163875	136.673	-0.365591	0.218701	-1.67165	0.0945935	0.333414
EIF1AX	ENSG00000173674	315.751	-0.395862	0.236834	-1.67147	0.0946282	0.333414
PPP6C	ENSG00000119414	34.9522	-0.547532	0.327589	-1.6714	0.0946427	0.333414
NCAPG2	ENSG00000146918	46.6554	0.479787	0.287126	1.671	0.0947215	0.333494
ARPC4	ENSG00000241553	111.433	-0.418534	0.25083	-1.6686	0.0951973	0.334177
HNRNPH1	ENSG00000169045	65.1222	-0.470394	0.281732	-1.66965	0.0949884	0.334177
FUNDC1	ENSG00000069509	84.7375	-0.541224	0.324286	-1.66897	0.0951226	0.334177
C12orf29	ENSG00000133641	39.002	-0.59119	0.354142	-1.66936	0.0950462	0.334177
GLOD4	ENSG00000167699	53.7314	-0.525975	0.31519	-1.66876	0.0951655	0.334177
PHF1	ENSG00000112511	27.9708	0.643354	0.385754	1.66778	0.0953592	0.334519
JUND	ENSG00000130522	79.0246	0.511247	0.306588	1.66754	0.0954075	0.334519
NUP37	ENSG00000075188	35.0064	-0.607474	0.364371	-1.66718	0.0954778	0.334567
DNASE1L1	ENSG00000013563	24.2324	0.711399	0.426921	1.66635	0.0956437	0.334951
ACIN1	ENSG00000100813	81.0992	0.408856	0.245496	1.66543	0.0958279	0.335271
KIAA0100	ENSG00000007202	79.8319	0.434759	0.261066	1.66532	0.0958483	0.335271
RNPEP	ENSG00000176393	28.8073	-0.668603	0.402423	-1.66144	0.096625	0.336563
TMEM44	ENSG00000145014	23.3376	0.754657	0.454014	1.66219	0.0964746	0.336563
TMED7	ENSG00000134970	25.8526	-0.719272	0.432713	-1.66224	0.0964653	0.336563
SLC25A5	ENSG00000005022	1573.12	-0.410487	0.247101	-1.66121	0.0966719	0.336563
CCS	ENSG00000173992	26.7606	-0.63067	0.379289	-1.66277	0.0963588	0.336563
TMEM126B	ENSG00000171204	115.786	-0.430639	0.258942	-1.66307	0.0962988	0.336563
ACD	ENSG00000102977	65.7281	-0.434646	0.261596	-1.66152	0.0966096	0.336563
TBC1D22A	ENSG00000054611	22.3208	0.659462	0.396973	1.66123	0.0966679	0.336563
PITPNM1	ENSG00000110697	25.1939	0.731468	0.440598	1.66017	0.0968798	0.337089
TAX1BP1	ENSG00000106052	115.414	-0.47862	0.288653	-1.65812	0.0972942	0.338134
TSTA3	ENSG00000104522	98.4205	-0.40272	0.242869	-1.65817	0.0972826	0.338134
AHNAK	ENSG00000124942	114.286	0.518043	0.312723	1.65656	0.0976091	0.33903
RAB2A	ENSG00000104388	177.574	-0.320231	0.193413	-1.65569	0.0977855	0.339444
SDHAF2	ENSG00000167985	76.67	-0.472076	0.285207	-1.65521	0.0978829	0.339583
CYB5R1	ENSG00000159348	30.0413	-0.665349	0.402445	-1.65327	0.0982762	0.340748
ZFPL1	ENSG00000162300	38.222	-0.52586	0.3183	-1.65209	0.0985163	0.340893
KIFC3	ENSG00000140859	138.421	0.406813	0.246163	1.65262	0.0984089	0.340893
MAFG	ENSG00000197063	112.626	0.455568	0.275758	1.65206	0.0985227	0.340893
HOMER3	ENSG00000051128	100.735	0.656326	0.397307	1.65193	0.0985479	0.340893
PGK1	ENSG00000102144	430.675	-0.456634	0.276554	-1.65116	0.0987058	0.34124
IMMT	ENSG00000132305	75.0308	-0.503329	0.304914	-1.65072	0.0987949	0.341349
SMG5	ENSG00000198952	38.6147	0.548967	0.332661	1.65023	0.0988962	0.341471
SSBP1	ENSG00000106028	277.119	-0.412608	0.25015	-1.64944	0.0990573	0.341471
INTS10	ENSG00000104613	61.4809	0.42633	0.258472	1.64942	0.0990607	0.341471
EIF3F	ENSG00000175390	379.248	-0.473714	0.287157	-1.64967	0.0990108	0.341471
ABCE1	ENSG00000164163	59.3215	-0.489319	0.296769	-1.64882	0.0991848	0.341502
TMEM104	ENSG00000109066	21.9382	0.694513	0.421171	1.649	0.099147	0.341502
BAZ1A	ENSG00000198604	59.8334	-0.464238	0.28167	-1.64816	0.0993194	0.341767
IPO5	ENSG00000065150	152.364	0.461662	0.280395	1.64647	0.0996673	0.342567
EIF2AK4	ENSG00000128829	96.9741	0.50138	0.304512	1.6465	0.0996605	0.342567
PDLIM2	ENSG00000120913	330.701	-0.29405	0.178681	-1.64567	0.0998319	0.342933
TEX10	ENSG00000136891	31.2801	0.590546	0.359028	1.64484	0.100002	0.343319
EIF5A	ENSG00000132507	1049.61	-0.32972	0.200555	-1.64404	0.100168	0.343492
NDUFV2	ENSG00000178127	366.837	-0.301995	0.183677	-1.64416	0.100142	0.343492
COL6A1	ENSG00000142156	95.3951	0.583176	0.354807	1.64364	0.10025	0.343574
ALDH1B1	ENSG00000137124	29.2057	-0.842459	0.512755	-1.643	0.100382	0.343827
THAP7	ENSG00000184436	150.256	0.355835	0.216649	1.64245	0.100497	0.344023
DDX52	ENSG00000141141	52.3029	-0.531448	0.323681	-1.64189	0.100613	0.344222
AHI1	ENSG00000135541	60.0604	0.463497	0.282444	1.64102	0.100793	0.344638
GPN1	ENSG00000198522	32.8672	-0.582361	0.355468	-1.63829	0.10136	0.346378
C14orf166	ENSG00000087302	146.56	-0.466297	0.284842	-1.63704	0.101622	0.346674
RPA1	ENSG00000132383	113.812	0.446275	0.272601	1.6371	0.10161	0.346674
CIRBP	ENSG00000099622	278.142	-0.319063	0.194841	-1.63756	0.101514	0.346674
LRRC14	ENSG00000160959	35.8581	0.559517	0.341943	1.63629	0.10178	0.34701
LINC00657	ENSG00000260032	58.0699	-0.471381	0.288134	-1.63598	0.101844	0.347031
ARL6IP5	ENSG00000144746	129.824	-0.382282	0.233817	-1.63496	0.102057	0.347153
FBXW2	ENSG00000119402	52.1529	0.465623	0.284756	1.63517	0.102014	0.347153
CDC123	ENSG00000151465	197.279	-0.430648	0.263443	-1.63469	0.102114	0.347153
FAM216A	ENSG00000204856	52.0795	-0.499875	0.305649	-1.63545	0.101954	0.347153
GPSM1	ENSG00000160360	22.6166	0.720755	0.441007	1.63434	0.102188	0.347203
TMX1	ENSG00000139921	58.5316	-0.451912	0.276661	-1.63345	0.102374	0.347639
MLLT11	ENSG00000213190	100.74	-1.48061	0.907013	-1.6324	0.102594	0.3477
TRIM7	ENSG00000146054	65.3952	-0.466185	0.285518	-1.63277	0.102517	0.3477
SMG1	ENSG00000157106	30.2606	0.653249	0.400214	1.63225	0.102627	0.3477
NOL12	ENSG00000100101	103.689	0.411146	0.251778	1.63297	0.102476	0.3477
KIAA1430	ENSG00000164323	51.2577	-0.468567	0.287268	-1.63112	0.102866	0.348279
AKR1B1	ENSG00000085662	328.384	0.442209	0.271193	1.6306	0.102974	0.348279
DGCR2	ENSG00000070413	21.681	0.792266	0.485796	1.63086	0.102919	0.348279
NDUFA12	ENSG00000184752	226.325	-0.497434	0.305294	-1.62936	0.103236	0.348768
ACAA2	ENSG00000167315	45.5996	-0.503435	0.308946	-1.62953	0.103201	0.348768
FAM3C	ENSG00000196937	139.272	0.338884	0.208065	1.62874	0.103367	0.348813
LAPTM4B	ENSG00000104341	166.196	-0.321906	0.197609	-1.629	0.103312	0.348813
PPP1R12A	ENSG00000058272	83.2835	-0.455995	0.280338	-1.62659	0.103825	0.349982
NUBP1	ENSG00000103274	44.325	-0.487318	0.299601	-1.62655	0.103832	0.349982
ITGB1BP1	ENSG00000119185	369.24	-0.328397	0.202078	-1.6251	0.10414	0.350394
SNX17	ENSG00000115234	87.1393	-0.377839	0.232515	-1.62501	0.10416	0.350394
NSA2	ENSG00000164346	99.8631	-0.518767	0.319267	-1.62487	0.10419	0.350394
COQ3	ENSG00000132423	21.5217	-0.680711	0.418761	-1.62554	0.104048	0.350394
FBXO5	ENSG00000112029	53.8675	-0.511691	0.315284	-1.62295	0.1046	0.350996
CKS2	ENSG00000123975	553.413	0.36931	0.227473	1.62354	0.104475	0.350996
MARCH5	ENSG00000198060	48.5797	-0.495246	0.305157	-1.62292	0.104606	0.350996
CINP	ENSG00000100865	45.7637	-0.495722	0.305349	-1.62346	0.104492	0.350996
PROCR	ENSG00000101000	52.677	-0.635043	0.391495	-1.6221	0.104782	0.351388
B4GALT2	ENSG00000117411	65.2522	0.418111	0.257861	1.62146	0.10492	0.351462
ACYP2	ENSG00000170634	24.397	-0.652999	0.402802	-1.62114	0.104987	0.351462
PGRMC2	ENSG00000164040	98.1297	-0.397618	0.245308	-1.62089	0.105041	0.351462
SAP30	ENSG00000164105	53.6836	-0.533469	0.329117	-1.62091	0.105037	0.351462
ULBP2	ENSG00000131015	32.2232	-0.683627	0.42184	-1.62058	0.105107	0.351483
PFKL	ENSG00000141959	45.4217	0.517377	0.31939	1.61989	0.105255	0.351781
RRS1	ENSG00000179041	47.287	-0.510974	0.315656	-1.61877	0.105498	0.352193
ZNF714	ENSG00000160352	24.7145	-0.617792	0.381593	-1.61898	0.105451	0.352193
ATP2C1	ENSG00000017260	57.5755	0.438925	0.271291	1.61791	0.105681	0.352409
MOSPD1	ENSG00000101928	37.1353	-0.525808	0.324986	-1.61794	0.105676	0.352409
CD58	ENSG00000116815	31.1641	-0.700622	0.433187	-1.61737	0.105799	0.352604
METTL5	ENSG00000138382	183.086	-0.353225	0.218483	-1.61672	0.105939	0.352658
CISD2	ENSG00000145354	140.521	-0.396321	0.245219	-1.61619	0.106053	0.352658
MCTS1	ENSG00000232119	102.206	-0.45147	0.279267	-1.61662	0.10596	0.352658
RPS27L	ENSG00000185088	824.333	0.443071	0.274135	1.61625	0.10604	0.352658
WDR61	ENSG00000140395	66.4726	-0.576188	0.356591	-1.61582	0.106133	0.352725
GGNBP2	ENSG00000005955	73.4721	-0.422155	0.261309	-1.61554	0.106194	0.35273
PSMD13	ENSG00000185627	134.278	-0.41814	0.258896	-1.61509	0.106291	0.352857
VIMP	ENSG00000131871	185.114	-0.543416	0.336534	-1.61474	0.106367	0.352909
MRPL9	ENSG00000143436	160.454	-0.370719	0.229646	-1.61431	0.106461	0.353025
DMAP1	ENSG00000178028	38.2481	-0.52712	0.326811	-1.61292	0.106761	0.353033
ARPC1B	ENSG00000130429	650.799	0.301887	0.187105	1.61347	0.106643	0.353033
CTSL	ENSG00000135047	95.2426	0.41696	0.258508	1.61295	0.106756	0.353033
PMPCA	ENSG00000165688	78.7491	0.432332	0.26787	1.61396	0.106535	0.353033
IMPA2	ENSG00000141401	25.5107	0.894784	0.554487	1.61372	0.106589	0.353033
FBXO32	ENSG00000156804	80.122	-0.396306	0.245868	-1.61187	0.106991	0.353594
TOMM20	ENSG00000173726	116.725	-0.377824	0.234514	-1.6111	0.107158	0.353951
DPCD	ENSG00000166171	150.585	-0.419124	0.260343	-1.60989	0.107421	0.354424
SERPINH1	ENSG00000149257	127.858	-0.456081	0.283263	-1.6101	0.107376	0.354424
MARCKS	ENSG00000155130	151.741	-0.402682	0.250182	-1.60956	0.107495	0.354469
SERBP1	ENSG00000142864	732.944	-0.366175	0.227551	-1.6092	0.107573	0.354532
RP11-427H3.3	ENSG00000188971	24.3263	0.602796	0.374748	1.60853	0.107718	0.354812
LETM1	ENSG00000168924	31.2888	0.567997	0.353232	1.608	0.107835	0.355001
LEPROT	ENSG00000213625	134.305	-0.361215	0.224841	-1.60653	0.108157	0.355169
LIMS1	ENSG00000169756	107.405	-0.363262	0.225989	-1.60743	0.107959	0.355169
SLC41A3	ENSG00000114544	24.2456	0.635794	0.395623	1.60707	0.108038	0.355169
PPP1R10	ENSG00000204569	45.9874	0.524287	0.326374	1.6064	0.108186	0.355169
MT-ND2	ENSG00000198763	1896.67	0.396922	0.247078	1.60646	0.108173	0.355169
DUT	ENSG00000128951	477.888	-0.482674	0.300589	-1.60576	0.108326	0.355432
DNM2	ENSG00000079805	45.4657	0.511357	0.319041	1.60279	0.108981	0.357383
POLDIP3	ENSG00000100227	35.3128	0.597066	0.37263	1.6023	0.109088	0.357537
TUBGCP3	ENSG00000126216	29.8638	0.612063	0.382497	1.60018	0.109559	0.35888
PSMG4	ENSG00000180822	132.559	0.346707	0.216927	1.59826	0.109985	0.360076
RAB3B	ENSG00000169213	125.623	-0.335636	0.210075	-1.5977	0.11011	0.360288
SRP54	ENSG00000100883	41.6558	-0.615048	0.385068	-1.59725	0.110211	0.36042
NRAS	ENSG00000213281	46.4652	-0.46206	0.289415	-1.59653	0.110371	0.360742
PODXL2	ENSG00000114631	40.5225	-0.480938	0.301366	-1.59586	0.110521	0.360939
OCIAD1	ENSG00000109180	72.494	-0.425561	0.26669	-1.59571	0.110553	0.360939
HRAS	ENSG00000174775	209.648	-0.365313	0.229468	-1.592	0.111385	0.363456
AMOTL1	ENSG00000166025	52.5027	0.438112	0.275252	1.59168	0.111457	0.363492
ADRBK1	ENSG00000173020	23.4618	0.667801	0.419788	1.59081	0.111653	0.363732
THOC6	ENSG00000131652	47.1764	0.493291	0.310075	1.59087	0.111638	0.363732
SMAD7	ENSG00000101665	28.6914	0.818633	0.51488	1.58995	0.111846	0.364159
ARGLU1	ENSG00000134884	128.11	0.389355	0.245039	1.58895	0.112071	0.364491
TGFB1I1	ENSG00000140682	77.0188	-0.432719	0.272296	-1.58915	0.112026	0.364491
SRGAP2	ENSG00000163486	25.2705	0.650262	0.409472	1.58805	0.112275	0.364756
BRCC3	ENSG00000185515	47.8382	-0.512422	0.322628	-1.58828	0.112224	0.364756
C7orf50	ENSG00000146540	292.182	-0.47168	0.297081	-1.58771	0.112351	0.364802
CDK5RAP2	ENSG00000136861	74.5617	0.413827	0.260775	1.58691	0.112533	0.365192
MORF4L2	ENSG00000123562	557.44	-0.335832	0.211703	-1.58634	0.112663	0.365415
CKAP4	ENSG00000136026	181.837	0.394719	0.248908	1.5858	0.112784	0.365606
RPS8	ENSG00000142937	4126.86	0.247219	0.155936	1.58539	0.112878	0.365712
MRPS23	ENSG00000181610	165.2	-0.453489	0.286173	-1.58467	0.113041	0.366041
KRT8	ENSG00000170421	64.0005	0.560754	0.354011	1.584	0.113193	0.366334
AR	ENSG00000169083	27.5992	0.572701	0.361845	1.58272	0.113485	0.366677
MYBL1	ENSG00000185697	39.7183	0.533628	0.337055	1.58321	0.113374	0.366677
SH3GL1	ENSG00000141985	70.4118	0.461668	0.291645	1.58298	0.113426	0.366677
SNRNP27	ENSG00000124380	67.2065	-0.500425	0.316593	-1.58066	0.113956	0.367999
TPR	ENSG00000047410	148.314	-0.354775	0.224542	-1.58	0.114108	0.368046
ATG5	ENSG00000057663	65.8498	-0.479994	0.303836	-1.57978	0.114157	0.368046
DDX24	ENSG00000089737	101.646	-0.389432	0.246484	-1.57995	0.114118	0.368046
GPRC5A	ENSG00000013588	276.552	0.384959	0.243853	1.57865	0.114417	0.368683
TAB2	ENSG00000055208	21.9229	0.687063	0.435405	1.57799	0.114568	0.368778
TUBB6	ENSG00000176014	177.4	-0.39627	0.251125	-1.57798	0.114571	0.368778
OBFC1	ENSG00000107960	31.1544	0.524707	0.33261	1.57755	0.11467	0.368898
GLT8D1	ENSG00000016864	31.7219	-0.625268	0.396557	-1.57674	0.114855	0.369292
POLD2	ENSG00000106628	266.515	-0.470729	0.298705	-1.5759	0.115048	0.369339
PQBP1	ENSG00000102103	126.383	-0.456119	0.28942	-1.57597	0.115032	0.369339
FAM111A	ENSG00000166801	52.8967	-0.511679	0.324697	-1.57587	0.115056	0.369339
PCOLCE	ENSG00000106333	39.7478	0.651515	0.413539	1.57546	0.11515	0.369439
HMGN2	ENSG00000198830	1519.7	-0.345162	0.219238	-1.57437	0.115403	0.369451
SLC30A9	ENSG00000014824	50.4575	-0.454977	0.288964	-1.57451	0.115368	0.369451
TDG	ENSG00000139372	56.2021	-0.61222	0.38885	-1.57444	0.115387	0.369451
COTL1	ENSG00000103187	747.032	0.29957	0.190259	1.57454	0.115364	0.369451
MZT2A	ENSG00000173272	474.511	0.326225	0.207328	1.57347	0.115611	0.369536
PRR16	ENSG00000184838	65.5406	-0.497251	0.316298	-1.5721	0.115928	0.369536
HNRNPA0	ENSG00000177733	123.095	-0.409624	0.260519	-1.57234	0.115873	0.369536
BCL7B	ENSG00000106635	91.4877	-0.397281	0.252664	-1.57237	0.115865	0.369536
PSIP1	ENSG00000164985	245.19	0.426778	0.271305	1.57306	0.115706	0.369536
NUMA1	ENSG00000137497	47.7198	0.538017	0.342005	1.57313	0.11569	0.369536
DDX23	ENSG00000174243	42.5663	0.470437	0.299179	1.57243	0.115852	0.369536
RP11-345J4.5	ENSG00000261740	98.5117	-0.375216	0.238633	-1.57236	0.115868	0.369536
TXNDC15	ENSG00000113621	38.2751	-0.633562	0.40313	-1.57161	0.116042	0.369548
TMEM255B	ENSG00000184497	33.6015	0.9059	0.57644	1.57154	0.116057	0.369548
UBN1	ENSG00000118900	80.9004	0.397624	0.253109	1.57096	0.116192	0.369584
LSM14A	ENSG00000257103	52.1399	-0.457753	0.291341	-1.57119	0.116138	0.369584
FAM173A	ENSG00000103254	101.184	-0.447042	0.284627	-1.57063	0.11627	0.369632
FANCI	ENSG00000140525	42.9648	0.482507	0.307325	1.57002	0.11641	0.369687
RRP1B	ENSG00000160208	41.0045	-0.503686	0.320817	-1.57001	0.116412	0.369687
RP11-349A22.5	ENSG00000257621	28.7061	0.59058	0.376417	1.56895	0.116659	0.370275
BAG2	ENSG00000112208	127.881	-0.386114	0.246253	-1.56796	0.11689	0.370623
NECAB3	ENSG00000125967	27.4365	0.583801	0.372336	1.56794	0.116894	0.370623
PLA2G15	ENSG00000103066	32.573	0.558485	0.356584	1.56621	0.117299	0.37171
TFB1M	ENSG00000029639	26.3372	0.569836	0.363951	1.56569	0.11742	0.371894
SNAP29	ENSG00000099940	134.316	0.342719	0.218995	1.56496	0.117593	0.372241
YKT6	ENSG00000106636	93.6967	-0.372907	0.238347	-1.56456	0.117687	0.37234
ARHGAP21	ENSG00000107863	29.2851	0.535805	0.342526	1.56427	0.117753	0.372351
CRIPT	ENSG00000119878	72.0563	-0.532582	0.340729	-1.56306	0.118037	0.372852
LINC00941	ENSG00000235884	29.6636	0.569252	0.364174	1.56313	0.118021	0.372852
DSG2	ENSG00000046604	32.5687	-0.580639	0.371622	-1.56245	0.118183	0.373114
DHX36	ENSG00000174953	76.8835	-0.394452	0.252612	-1.56149	0.118407	0.373423
ABHD17A	ENSG00000129968	60.4783	0.468188	0.299884	1.56123	0.11847	0.373423
DNAJB1	ENSG00000132002	63.6075	0.463077	0.296518	1.56171	0.118356	0.373423
MSH2	ENSG00000095002	34.1456	-0.616145	0.39597	-1.55604	0.119699	0.3739
RAP2B	ENSG00000181467	23.9311	0.713113	0.457107	1.56006	0.118746	0.3739
NUP155	ENSG00000113569	23.7823	0.608959	0.390656	1.55881	0.119041	0.3739
SNRNP48	ENSG00000168566	27.3316	-0.613881	0.393901	-1.55847	0.119123	0.3739
C6orf106	ENSG00000196821	32.5915	0.573335	0.36862	1.55536	0.119861	0.3739
HINT3	ENSG00000111911	24.9689	0.60397	0.387865	1.55717	0.119431	0.3739
KMT2C	ENSG00000055609	21.7184	0.612386	0.39375	1.55527	0.119883	0.3739
EBP	ENSG00000147155	147.494	0.339049	0.217445	1.55924	0.118939	0.3739
PTGES2	ENSG00000148334	172.403	0.395156	0.253979	1.55586	0.119741	0.3739
AIP	ENSG00000110711	77.4376	-0.479085	0.307603	-1.55747	0.119358	0.3739
NOP10	ENSG00000182117	584.07	0.269017	0.172961	1.55536	0.119859	0.3739
ALG1	ENSG00000033011	24.8608	-0.593181	0.380364	-1.55951	0.118876	0.3739
COASY	ENSG00000068120	66.9306	0.491058	0.315173	1.55806	0.119219	0.3739
G6PC3	ENSG00000141349	67.441	-0.388967	0.249547	-1.55869	0.119069	0.3739
MIF4GD	ENSG00000125457	29.3576	-0.688485	0.442036	-1.55753	0.119344	0.3739
RPL17	ENSG00000265681	335.158	0.434037	0.278226	1.56002	0.118755	0.3739
PFDN4	ENSG00000101132	106.72	-0.524412	0.336821	-1.55694	0.119484	0.3739
CHAF1A	ENSG00000167670	100.032	0.375958	0.241545	1.55647	0.119596	0.3739
BCAT2	ENSG00000105552	29.6089	-0.5741	0.368656	-1.55728	0.119404	0.3739
HPS4	ENSG00000100099	22.757	0.657024	0.422421	1.55538	0.119857	0.3739
SRPRB	ENSG00000144867	47.2218	-0.499577	0.321417	-1.5543	0.120114	0.374424
PSMD11	ENSG00000108671	128.164	-0.352918	0.227195	-1.55337	0.120335	0.374916
EIF2B3	ENSG00000070785	49.594	-0.477315	0.30757	-1.55189	0.120689	0.375648
YIPF4	ENSG00000119820	46.4183	-0.450778	0.290477	-1.55186	0.120697	0.375648
ELAC2	ENSG00000006744	37.0725	0.48766	0.314613	1.55003	0.121134	0.376812
HIGD1A	ENSG00000181061	71.4999	-0.558383	0.360337	-1.54961	0.121235	0.376927
MAD2L2	ENSG00000116670	110.943	-0.360972	0.233081	-1.5487	0.121453	0.377277
CYHR1	ENSG00000187954	51.7937	0.462608	0.298724	1.54861	0.121474	0.377277
SLC25A14	ENSG00000102078	26.0259	-0.561282	0.362711	-1.54746	0.121752	0.377942
MRPL1	ENSG00000169288	23.9723	-0.659212	0.426178	-1.5468	0.121911	0.378238
SCOC	ENSG00000153130	84.5654	-0.451151	0.292046	-1.5448	0.122396	0.379542
EMB	ENSG00000170571	24.7783	-0.662474	0.42895	-1.54441	0.122489	0.379606
ZWINT	ENSG00000122952	445.017	-0.410376	0.265756	-1.54418	0.122544	0.379606
HARS	ENSG00000170445	79.3378	-0.541669	0.351017	-1.54314	0.122797	0.379824
PDZD11	ENSG00000120509	224.263	-0.354126	0.229444	-1.54341	0.122732	0.379824
TMEM55B	ENSG00000165782	37.5078	0.514819	0.333627	1.5431	0.122807	0.379824
SEC62	ENSG00000008952	121.466	-0.418627	0.271339	-1.54282	0.122875	0.379838
GPBP1	ENSG00000062194	81.7258	-0.431143	0.279547	-1.54229	0.123003	0.380034
GLE1	ENSG00000119392	24.1631	0.634405	0.411846	1.54039	0.123464	0.38126
TMEM219	ENSG00000149932	187.133	0.35715	0.231952	1.53976	0.123619	0.381356
SELO	ENSG00000073169	33.9364	0.52891	0.343506	1.53974	0.123624	0.381356
TBRG4	ENSG00000136270	40.696	-0.514363	0.334136	-1.53938	0.123711	0.381426
WASL	ENSG00000106299	31.1186	0.582986	0.379071	1.53793	0.124065	0.38212
CAPRIN1	ENSG00000135387	62.7502	-0.479686	0.311898	-1.53796	0.124059	0.38212
WASF2	ENSG00000158195	215.113	0.326427	0.212304	1.53755	0.12416	0.382213
SET	ENSG00000119335	637.902	0.501465	0.326289	1.53687	0.124324	0.382522
DNAJC8	ENSG00000126698	242.136	-0.373632	0.243159	-1.53658	0.124397	0.382546
S100A2	ENSG00000196754	55.0968	-0.557937	0.363577	-1.53458	0.124887	0.382664
METTL21A	ENSG00000144401	53.1507	0.472072	0.307559	1.5349	0.124808	0.382664
PPP1R7	ENSG00000115685	69.1864	-0.467154	0.304121	-1.53608	0.124519	0.382664
ISCA1	ENSG00000135070	68.9955	0.416593	0.271297	1.53556	0.124646	0.382664
CWF19L1	ENSG00000095485	30.0675	0.550587	0.358503	1.53579	0.124589	0.382664
CD276	ENSG00000103855	27.7936	0.657606	0.428518	1.5346	0.124881	0.382664
CKLF	ENSG00000217555	524.782	0.359799	0.234407	1.53494	0.124799	0.382664
CPSF6	ENSG00000111605	43.7912	-0.462825	0.301829	-1.5334	0.125176	0.383352
EID1	ENSG00000255302	388.496	-0.469391	0.306228	-1.53282	0.125321	0.383597
ALDH9A1	ENSG00000143149	35.6004	-0.527676	0.344482	-1.53179	0.125573	0.383882
SEC13	ENSG00000157020	171.458	-0.361477	0.236005	-1.53165	0.125608	0.383882
NACC1	ENSG00000160877	50.1158	0.551475	0.360024	1.53177	0.125579	0.383882
KEAP1	ENSG00000079999	67.5385	0.398791	0.260446	1.53118	0.125724	0.384038
RPS4X	ENSG00000198034	4003.82	0.34679	0.226598	1.53042	0.125914	0.384419
RP9	ENSG00000164610	38.5741	-0.487575	0.318816	-1.52933	0.126183	0.385044
GPATCH4	ENSG00000160818	173.514	-0.378322	0.24745	-1.52888	0.126293	0.38513
DCXR	ENSG00000169738	179.392	-0.363384	0.237714	-1.52866	0.126348	0.38513
GART	ENSG00000159131	52.1366	-0.465553	0.304596	-1.52843	0.126406	0.38513
SNHG7	ENSG00000233016	204.362	0.432373	0.283002	1.52781	0.126559	0.385397
CTNNBIP1	ENSG00000178585	51.5693	-0.773856	0.506879	-1.52671	0.126834	0.385838
STX8	ENSG00000170310	42.9982	-0.54709	0.358304	-1.52689	0.126789	0.385838
ATXN10	ENSG00000130638	87.2535	-0.426313	0.279394	-1.52585	0.127047	0.386289
ICAM1	ENSG00000090339	49.8423	0.686575	0.450251	1.52487	0.127291	0.386832
RPS10	ENSG00000124614	1620.93	0.396662	0.26044	1.52305	0.127747	0.388018
UBE2J2	ENSG00000160087	134.164	-0.345298	0.227191	-1.51986	0.128546	0.389748
IPO9	ENSG00000198700	68.8692	0.595036	0.391541	1.51973	0.128579	0.389748
C4orf48	ENSG00000243449	230.506	-0.524905	0.345286	-1.5202	0.12846	0.389748
CCDC91	ENSG00000123106	49.5777	-0.447514	0.294347	-1.52036	0.128421	0.389748
STOML2	ENSG00000165283	303.285	0.379072	0.249645	1.51844	0.128903	0.390334
SNW1	ENSG00000100603	66.4255	-0.403094	0.265467	-1.51844	0.128904	0.390334
ZIC1	ENSG00000152977	21.9564	0.640065	0.421631	1.51807	0.128997	0.390414
STXBP1	ENSG00000136854	26.9339	0.587221	0.387017	1.5173	0.129191	0.390763
GLYR1	ENSG00000140632	37.6246	0.479089	0.315794	1.51709	0.129244	0.390763
MFN2	ENSG00000116688	41.1534	0.51421	0.339336	1.51534	0.129686	0.391901
RQCD1	ENSG00000144580	45.6583	0.473374	0.312731	1.51368	0.130107	0.392173
SRF	ENSG00000112658	33.0558	0.640821	0.423187	1.51428	0.129956	0.392173
TAGLN	ENSG00000149591	325.061	-1.258	0.831061	-1.51372	0.130096	0.392173
RFWD3	ENSG00000168411	46.553	0.509641	0.336599	1.51409	0.130003	0.392173
AC010642.1	ENSG00000267216	41.1905	-0.519324	0.34301	-1.51402	0.13002	0.392173
ASAP2	ENSG00000151693	38.341	-0.547186	0.361704	-1.5128	0.13033	0.392248
GFPT1	ENSG00000198380	30.7832	-0.529404	0.349903	-1.513	0.130279	0.392248
ALDOA	ENSG00000149925	1340.85	-0.323445	0.213765	-1.51309	0.130257	0.392248
CASC7	ENSG00000259758	27.3051	0.610153	0.403572	1.51188	0.130564	0.392752
ACOT7	ENSG00000097021	119.337	-0.348162	0.230607	-1.50976	0.131104	0.393621
HNRNPR	ENSG00000125944	227.442	-0.408573	0.270724	-1.50919	0.131251	0.393621
DPY30	ENSG00000162961	170.141	-0.440618	0.291895	-1.50951	0.131168	0.393621
SLU7	ENSG00000164609	39.0216	-0.505465	0.334885	-1.50937	0.131205	0.393621
ABHD11	ENSG00000106077	26.1489	-0.58075	0.384806	-1.5092	0.131247	0.393621
POLL	ENSG00000166169	22.183	0.696526	0.461258	1.51006	0.131029	0.393621
HDLBP	ENSG00000115677	198.901	0.350671	0.232441	1.50864	0.13139	0.393638
AHRR	ENSG00000063438	22.1706	0.70435	0.46681	1.50886	0.131335	0.393638
CASP3	ENSG00000164305	30.252	-0.559232	0.370951	-1.50756	0.131666	0.394268
VPS37B	ENSG00000139722	28.5036	0.567411	0.376633	1.50653	0.13193	0.394662
PTPN2	ENSG00000175354	36.0349	-0.54566	0.362197	-1.50653	0.131931	0.394662
SNRNP35	ENSG00000184209	30.1098	-0.527361	0.350196	-1.5059	0.132093	0.394946
NUP54	ENSG00000138750	26.6936	-0.556153	0.369597	-1.50476	0.132387	0.395227
LRP10	ENSG00000197324	55.3265	0.446303	0.296569	1.50489	0.132353	0.395227
NDUFA3	ENSG00000170906	95.5893	-0.52849	0.351213	-1.50476	0.132386	0.395227
BNIP3L	ENSG00000104765	135.026	-0.435268	0.289639	-1.5028	0.132891	0.396334
AGAP2-AS1	ENSG00000255737	32.9166	-0.48951	0.325725	-1.50283	0.132882	0.396334
PRPF40A	ENSG00000196504	104.786	-0.439511	0.29284	-1.50086	0.133392	0.397428
C9orf37	ENSG00000203993	45.999	0.498169	0.331888	1.50102	0.133352	0.397428
MLEC	ENSG00000110917	208.161	-0.298315	0.198968	-1.49931	0.133794	0.398424
OGDH	ENSG00000105953	36.3625	0.666222	0.44446	1.49895	0.133888	0.398474
KMT2E	ENSG00000005483	58.6978	0.403548	0.269291	1.49856	0.133989	0.398474
TLK2	ENSG00000146872	21.7466	0.591553	0.394773	1.49847	0.134012	0.398474
UCK1	ENSG00000130717	63.9791	0.428898	0.286383	1.49764	0.134227	0.398913
STUB1	ENSG00000103266	362.126	0.279444	0.186633	1.49729	0.134317	0.398981
POLR2H	ENSG00000163882	185.586	-0.360904	0.241129	-1.49673	0.134464	0.399218
RPP30	ENSG00000148688	147.231	-0.392883	0.262748	-1.49528	0.13484	0.400135
[truncated: 17,447 more rows]

## Sheet: S6c (G2)
Supplemental Table S6: scRNA-seq phase-specific DE results. c DE analysis results (DESeq2 output) comparing NHA-CICKO versus NHA-CICWT cells assigned to the G2 phase. Base mean: mean of normalized counts for all samples. SE: standard error. Stat: Wald statistic. Adjusted p-values were obtained using the Benjamini-Hochberg method. Genes without adjusted p-values were filtered by automatic independ…
gene name	ensembl ID	base mean	log2 fold-change	log fold-change SE	stat	p-value	adjusted p-value
THY1	ENSG00000154096	57.349	-9.14113	1.05247	-8.68539	3.77435e-18	1.957e-14
GYPC	ENSG00000136732	39.6739	2.90602	0.378779	7.67208	1.69234e-14	4.38738e-11
DUSP23	ENSG00000158716	26.7809	-3.38675	0.484263	-6.99363	2.67869e-12	3.11763e-09
NLRP1	ENSG00000091592	90.5321	-1.97726	0.283013	-6.98648	2.8187e-12	3.11763e-09
TNNT1	ENSG00000105048	23.344	-4.84196	0.693946	-6.97743	3.00639e-12	3.11763e-09
SLC7A11	ENSG00000151012	44.5273	2.47322	0.370885	6.66843	2.58559e-11	2.23438e-08
PLAU	ENSG00000122861	105.351	1.88104	0.309322	6.08119	1.19294e-09	8.83626e-07
TUBA1A	ENSG00000167552	48.4487	-2.07203	0.342532	-6.04915	1.45614e-09	9.43762e-07
CD9	ENSG00000010278	30.4757	-2.98163	0.498848	-5.97702	2.27259e-09	1.22673e-06
TXNRD1	ENSG00000198431	175.528	1.69297	0.283557	5.97046	2.36592e-09	1.22673e-06
TGFB2	ENSG00000092969	33.4622	-2.20745	0.375498	-5.87871	4.13477e-09	1.94898e-06
NREP	ENSG00000134986	26.3884	-2.51614	0.431818	-5.82686	5.6479e-09	2.44037e-06
INHBA	ENSG00000122641	25.7942	-2.43625	0.439864	-5.53863	3.04844e-08	1.21586e-05
NEAT1	ENSG00000245532	207.42	1.15789	0.21023	5.50772	3.63516e-08	1.34631e-05
HMGA1	ENSG00000137309	953.153	1.16249	0.212535	5.46964	4.50941e-08	1.55875e-05
CTGF	ENSG00000118523	204.951	-1.35906	0.250045	-5.43528	5.47105e-08	1.71561e-05
LINC00704	ENSG00000231298	13.0825	3.46405	0.637907	5.43033	5.62494e-08	1.71561e-05
PSAP	ENSG00000197746	175.04	1.17096	0.226861	5.16159	2.44863e-07	7.0534e-05
PHLDA1	ENSG00000139289	211.127	1.56092	0.304488	5.12637	2.95387e-07	8.06094e-05
PLP2	ENSG00000102007	191.069	-1.01489	0.200851	-5.05295	4.35048e-07	0.000112786
COMMD6	ENSG00000188243	307.626	0.985988	0.196557	5.0163	5.2675e-07	0.000130057
TFPI2	ENSG00000105825	31.4591	2.33862	0.468954	4.98688	6.13632e-07	0.000144622
EVC	ENSG00000072840	36.324	1.82668	0.367752	4.96715	6.79429e-07	0.000153167
PYGB	ENSG00000100994	58.2486	1.36472	0.279914	4.87549	1.08541e-06	0.000234493
PSCA	ENSG00000167653	17.4548	2.60726	0.540971	4.8196	1.43847e-06	0.000298339
TPM1	ENSG00000140416	611.077	-1.10554	0.230178	-4.80298	1.56323e-06	0.000311745
FTH1	ENSG00000167996	6401.17	0.979218	0.204869	4.77973	1.75531e-06	0.000337085
HN1	ENSG00000189159	343.044	-1.04037	0.218949	-4.75163	2.01788e-06	0.000373668
FAM129B	ENSG00000136830	77.1287	1.25287	0.264371	4.73905	2.14726e-06	0.000383916
HSPB1	ENSG00000106211	517.389	-0.975332	0.20706	-4.71039	2.47242e-06	0.000413533
MT1X	ENSG00000187193	80.5428	-1.40538	0.298134	-4.71392	2.42991e-06	0.000413533
SLC7A2	ENSG00000003989	12.9986	-2.92361	0.62858	-4.65113	3.30122e-06	0.000534901
SBDS	ENSG00000126524	91.7507	-1.11711	0.242481	-4.60701	4.08509e-06	0.000641855
ABLIM1	ENSG00000099204	14.4853	2.36254	0.520535	4.53868	5.66079e-06	0.00084017
SPHK1	ENSG00000176170	36.4706	1.706	0.375913	4.53829	5.67135e-06	0.00084017
G6PD	ENSG00000160211	55.2546	1.39682	0.310533	4.49813	6.85539e-06	0.000987366
TRIOBP	ENSG00000100106	45.9601	1.43933	0.321144	4.48188	7.39894e-06	0.00103685
LAMA4	ENSG00000112769	27.264	2.73541	0.612749	4.46416	8.03849e-06	0.00109683
CBX6	ENSG00000183741	42.9217	1.42002	0.319203	4.44863	8.64206e-06	0.00114895
BRI3	ENSG00000164713	381.186	1.15187	0.260408	4.42333	9.71894e-06	0.00125982
SQSTM1	ENSG00000161011	215.281	0.919559	0.210009	4.37866	1.19411e-05	0.00145219
C9orf89	ENSG00000165233	69.4623	1.26495	0.289013	4.3768	1.20432e-05	0.00145219
CTSD	ENSG00000117984	164.413	1.01337	0.231236	4.38238	1.17388e-05	0.00145219
RANGAP1	ENSG00000100401	58.1338	1.3368	0.306212	4.36559	1.26779e-05	0.00149398
HPCAL1	ENSG00000115756	85.6618	1.25593	0.288684	4.35052	1.35814e-05	0.00153086
CSRP2	ENSG00000175183	55.625	-1.45585	0.334401	-4.35359	1.33926e-05	0.00153086
HHIP	ENSG00000164161	72.5124	-1.43208	0.335179	-4.27259	1.9322e-05	0.00213158
SDC2	ENSG00000169439	23.8022	-2.07026	0.485819	-4.26139	2.03161e-05	0.00219456
RPS19BP1	ENSG00000187051	259.167	0.932301	0.219299	4.25127	2.12561e-05	0.00224925
GBAS	ENSG00000146729	26.2478	-1.58768	0.376251	-4.21973	2.44592e-05	0.00253642
GMPR	ENSG00000137198	15.2235	2.37601	0.56462	4.20815	2.57472e-05	0.00256729
NQO1	ENSG00000181019	233.056	1.29274	0.307006	4.2108	2.54474e-05	0.00256729
ENTPD6	ENSG00000197586	27.9772	1.6433	0.391019	4.20261	2.63856e-05	0.00258131
SLC7A5	ENSG00000103257	88.0871	1.21844	0.290541	4.19368	2.74461e-05	0.00263533
CYB5R3	ENSG00000100243	103.583	1.01147	0.24225	4.17534	2.97546e-05	0.00280505
UAP1	ENSG00000117143	50.2673	-1.39094	0.336297	-4.13605	3.53335e-05	0.0032715
GNG11	ENSG00000127920	124.487	1.55296	0.384165	4.04243	5.29004e-05	0.00481208
ETV4	ENSG00000175832	13.1269	2.32348	0.576887	4.02762	5.6344e-05	0.00503696
SNCA	ENSG00000145335	18.3602	2.17012	0.539464	4.02274	5.75259e-05	0.00505545
EEF2	ENSG00000167658	490.774	0.736192	0.18385	4.0043	6.22001e-05	0.00537513
MYCBP2	ENSG00000005810	34.808	1.34234	0.336406	3.99024	6.60064e-05	0.00561055
FOSL1	ENSG00000175592	118.871	1.07722	0.273084	3.94467	7.99111e-05	0.00668289
CARS2	ENSG00000134905	40.6744	1.28049	0.325996	3.92792	8.56833e-05	0.00694168
RPS2	ENSG00000140988	15386.4	0.737927	0.187698	3.93145	8.44337e-05	0.00694168
SRSF3	ENSG00000112081	259.782	-0.933667	0.238	-3.92296	8.7467e-05	0.00697718
HPS1	ENSG00000107521	65.736	1.03249	0.264285	3.90673	9.35526e-05	0.00722877
RAB31	ENSG00000168461	45.7864	1.17561	0.301065	3.90484	9.4286e-05	0.00722877
C22orf39	ENSG00000242259	47.0558	1.13081	0.28969	3.90352	9.48036e-05	0.00722877
DST	ENSG00000151914	112.13	0.96755	0.24957	3.87687	0.000105809	0.00785818
ETHE1	ENSG00000105755	46.414	-1.25779	0.324489	-3.87623	0.000106089	0.00785818
ARID5B	ENSG00000150347	65.1906	-1.16181	0.300696	-3.86373	0.000111669	0.008109
ATF4	ENSG00000128272	128.838	0.932272	0.241415	3.86169	0.000112603	0.008109
PSMA2_ENSG00000106588	ENSG00000106588	78.5642	-1.30053	0.337365	-3.85497	0.000115745	0.00822106
AGPAT2	ENSG00000169692	19.0905	-2.29724	0.597802	-3.84281	0.000121633	0.00852255
UQCR10	ENSG00000184076	403.203	0.711245	0.185413	3.83601	0.000125049	0.00864508
H2AFY	ENSG00000113648	105.906	-0.905523	0.237312	-3.81575	0.000135767	0.00926256
EIF3L	ENSG00000100129	124.087	0.943812	0.248323	3.80074	0.000144263	0.00971433
NEXN	ENSG00000162614	59.9091	-1.08928	0.287687	-3.78634	0.000152884	0.00975251
PDE4DIP	ENSG00000178104	31.492	1.38542	0.365969	3.78562	0.000153325	0.00975251
SSR2	ENSG00000163479	153.512	-0.772712	0.204197	-3.78415	0.000154235	0.00975251
SERPINB2	ENSG00000197632	15.3333	2.85203	0.753151	3.7868	0.000152603	0.00975251
SPECC1L	ENSG00000100014	14.5824	1.89163	0.498935	3.79133	0.000149841	0.00975251
ANP32E	ENSG00000143401	57.3086	-1.05082	0.278384	-3.77471	0.000160194	0.0100073
TRIM16L	ENSG00000108448	38.9428	1.38341	0.370468	3.73423	0.000188291	0.0116225
HIST1H2BK	ENSG00000197903	91.8499	1.2229	0.328235	3.72568	0.000194786	0.0118819
CHCHD5	ENSG00000125611	52.3362	1.04416	0.281313	3.71174	0.000205839	0.0122914
SND1	ENSG00000197157	32.1765	1.3137	0.353977	3.71125	0.000206239	0.0122914
GPR56	ENSG00000205336	11.7491	2.00935	0.544572	3.68977	0.000224456	0.013225
ATP1B3	ENSG00000069849	81.2682	-1.04574	0.283708	-3.68598	0.000227823	0.0132726
EFEMP1	ENSG00000115380	19.6383	-1.74421	0.476087	-3.66363	0.000248664	0.0139687
SPARC	ENSG00000113140	241.58	-0.791041	0.21577	-3.66612	0.000246256	0.0139687
NUP188	ENSG00000095319	36.2266	1.36805	0.37361	3.6617	0.000250548	0.0139687
MTFP1	ENSG00000242114	25.503	1.54751	0.422155	3.66573	0.000246635	0.0139687
PPIC	ENSG00000168938	53.2431	-1.25633	0.344187	-3.65015	0.000262092	0.0143625
POLR2F	ENSG00000100142	238.217	0.740553	0.202941	3.64911	0.000263151	0.0143625
TLE1	ENSG00000196781	14.5573	1.85852	0.510507	3.64054	0.000272064	0.0146943
ISG15	ENSG00000187608	75.5047	-1.2106	0.333346	-3.63168	0.000281584	0.0150517
BAMBI	ENSG00000095739	23.934	-1.48556	0.410467	-3.61919	0.000295526	0.0154778
HMGA2	ENSG00000149948	109.028	0.862988	0.238304	3.62138	0.000293039	0.0154778
GDF6	ENSG00000156466	12.9583	-1.89483	0.525731	-3.60418	0.000313135	0.0162361
C12orf75	ENSG00000235162	255.695	-0.903505	0.25172	-3.58933	0.000331533	0.0170198
SEP15	ENSG00000183291	62.1385	-1.06979	0.298415	-3.5849	0.000337207	0.0170507
OCIAD2	ENSG00000145247	110.794	-1.14675	0.320213	-3.58121	0.000342002	0.0170507
AIMP2	ENSG00000106305	37.9232	-1.27153	0.354939	-3.58238	0.000340482	0.0170507
NDUFS4	ENSG00000164258	89.2949	-1.06513	0.297872	-3.5758	0.000349163	0.0170793
MMP24-AS1	ENSG00000126005	95.0817	0.887898	0.248289	3.57607	0.000348793	0.0170793
RAB1A	ENSG00000138069	64.5458	-0.984192	0.276368	-3.56117	0.000369212	0.0178913
MLLT11	ENSG00000213190	45.7078	-1.72009	0.483697	-3.55613	0.000376359	0.0179667
LMF2	ENSG00000100258	31.5738	1.40294	0.394616	3.55519	0.0003777	0.0179667
CSNK1E	ENSG00000213923	68.3155	1.14664	0.323119	3.54867	0.000387176	0.0182501
SCO2	ENSG00000130489	51.6769	1.04967	0.296895	3.53549	0.000407016	0.0190124
PHF14	ENSG00000106443	35.7072	-1.15451	0.327069	-3.52987	0.000415758	0.0192474
KIAA1199	ENSG00000103888	23.067	-2.00888	0.569778	-3.52572	0.000422338	0.0193789
BGN	ENSG00000182492	35.2025	-1.39577	0.397579	-3.51068	0.000446962	0.0198432
TXNRD2	ENSG00000184470	60.8415	1.16879	0.332719	3.51283	0.000443356	0.0198432
GGA1	ENSG00000100083	20.084	1.54763	0.440437	3.51385	0.00044167	0.0198432
FAM207A	ENSG00000160256	47.3459	-1.08005	0.307687	-3.5102	0.000447763	0.0198432
LAPTM4A	ENSG00000068697	89.8066	-1.12206	0.321875	-3.48602	0.000490266	0.0215426
MARCKSL1	ENSG00000175130	67.4872	-1.08295	0.310965	-3.48255	0.000496665	0.0216404
RPS12	ENSG00000112306	2157.76	0.94049	0.270611	3.47543	0.000510036	0.0220378
SELT	ENSG00000198843	90.3194	-0.910943	0.262792	-3.4664	0.000527472	0.0225181
GUCD1	ENSG00000138867	29.0651	1.21099	0.349471	3.4652	0.000529839	0.0225181
C22orf29	ENSG00000215012	22.501	1.42125	0.412134	3.44852	0.00056367	0.0237612
MVP	ENSG00000013364	36.7494	1.07475	0.31249	3.43931	0.000583189	0.0243858
PSMG1	ENSG00000183527	55.4921	-1.04384	0.303916	-3.43465	0.000593317	0.0246108
UQCRFS1	ENSG00000169021	127.757	-0.820492	0.239197	-3.43019	0.000603167	0.0248208
NUF2	ENSG00000143228	64.6505	-1.27177	0.373646	-3.40368	0.000664839	0.0267224
CYCS	ENSG00000172115	248.103	-1.01985	0.299376	-3.40657	0.000657848	0.0267224
TJP2	ENSG00000119139	27.7979	1.23052	0.361352	3.40532	0.000660869	0.0267224
ARF4	ENSG00000168374	95.1013	-1.13372	0.334068	-3.39369	0.000689589	0.027504
GGCT	ENSG00000006625	72.5796	-1.01085	0.298178	-3.39008	0.000698722	0.0275806
SMDT1	ENSG00000183172	141.52	0.836115	0.246733	3.38874	0.000702149	0.0275806
C11orf58	ENSG00000110696	139.382	-0.864373	0.255339	-3.3852	0.000711276	0.0277291
GNAI3	ENSG00000065135	29.0627	-1.27251	0.376207	-3.38246	0.000718401	0.0277978
PTGES3	ENSG00000110958	171.242	-0.767568	0.227095	-3.37993	0.000725035	0.0278467
MIF	ENSG00000240972	338.786	0.827975	0.245781	3.36876	0.000755085	0.0287876
SRSF7	ENSG00000115875	124.439	-0.810304	0.241359	-3.35726	0.000787178	0.0297921
SREBF2	ENSG00000198911	20.2102	1.53821	0.459574	3.34703	0.00081683	0.0306903
COL1A1	ENSG00000108821	291.983	-0.854841	0.255785	-3.34203	0.000831681	0.0310235
RXRA	ENSG00000186350	20.5188	1.41272	0.424015	3.33176	0.000862987	0.0319614
TMBIM1	ENSG00000135926	24.0084	1.32412	0.397715	3.32933	0.000870564	0.0320133
CBX3	ENSG00000122565	145.704	-0.801549	0.241482	-3.3193	0.000902448	0.0329521
DUSP4	ENSG00000120875	28.326	1.51756	0.458361	3.31084	0.000930178	0.0334929
BTG1	ENSG00000133639	85.2848	0.857802	0.258975	3.31229	0.000925345	0.0334929
SGCB	ENSG00000163069	27.1633	-1.24679	0.377057	-3.30663	0.000944259	0.0335341
CARD10	ENSG00000100065	16.8284	1.71504	0.518463	3.30794	0.000939841	0.0335341
CRABP2	ENSG00000143320	34.1397	-1.18798	0.363632	-3.26699	0.00108698	0.0383401
UGGT1	ENSG00000136731	17.6736	1.53863	0.471863	3.26074	0.0011112	0.0389296
GTSE1	ENSG00000075218	105.783	0.832955	0.25565	3.25819	0.00112127	0.0390188
THOC7	ENSG00000163634	59.4377	-0.959802	0.295881	-3.24388	0.00117912	0.0401199
RP11-395G23.3	ENSG00000254615	18.2031	1.40039	0.431398	3.24617	0.0011697	0.0401199
SRSF2	ENSG00000161547	182.84	-0.663766	0.204352	-3.24815	0.00116157	0.0401199
FTL	ENSG00000087086	5394.73	0.753264	0.232293	3.24274	0.00118387	0.0401199
SOD1	ENSG00000142168	267.927	-0.747527	0.230722	-3.23994	0.00119555	0.0402529
TMCO1	ENSG00000143183	54.1887	-0.999079	0.308616	-3.23729	0.00120669	0.0403658
SLC26A2	ENSG00000155850	18.7242	-1.365	0.422158	-3.23337	0.00122337	0.0406615
SEPT7	ENSG00000122545	89.4154	-1.24362	0.385376	-3.22702	0.00125087	0.0413105
SPEG	ENSG00000072195	14.0366	1.66904	0.518056	3.22173	0.0012742	0.0415516
RAB27B	ENSG00000041353	11.8235	1.85869	0.576898	3.22187	0.00127358	0.0415516
SCP2	ENSG00000116171	56.0067	-1.30113	0.404462	-3.21695	0.00129563	0.0417257
IL11	ENSG00000095752	26.5341	-1.38773	0.431204	-3.21826	0.0012897	0.0417257
CPNE7	ENSG00000178773	16.0444	1.63778	0.510806	3.20627	0.00134469	0.0430384
SCARA3	ENSG00000168077	23.5647	1.25324	0.393024	3.1887	0.00142914	0.0454607
TPCN1	ENSG00000186815	27.3666	1.2238	0.384784	3.18049	0.00147028	0.046484
MFAP2	ENSG00000117122	12.0009	-1.8496	0.582149	-3.17719	0.00148709	0.0465168
CCNC	ENSG00000112237	28.6115	-1.14502	0.360434	-3.17677	0.00148926	0.0465168
TMEM54	ENSG00000121900	41.864	-1.07612	0.339746	-3.16742	0.001538	0.0470276
ACO1	ENSG00000122729	29.6861	1.15752	0.365532	3.16668	0.00154189	0.0470276
MAFF	ENSG00000185022	14.3637	1.84253	0.581469	3.16875	0.00153095	0.0470276
HMGN1	ENSG00000205581	287.56	-0.685949	0.216407	-3.16972	0.00152585	0.0470276
SLC25A37	ENSG00000147454	33.7287	1.11231	0.351962	3.16031	0.00157599	0.0475088
TXNL1	ENSG00000091164	64.6638	-0.871666	0.275724	-3.16137	0.00157028	0.0475088
RGS20	ENSG00000147509	17.1234	1.43463	0.454305	3.15786	0.00158934	0.047535
ZC3H7B	ENSG00000100403	42.781	1.04437	0.330834	3.15678	0.0015952	0.047535
PDIA6	ENSG00000143870	115.273	-0.880789	0.28017	-3.14377	0.00166788	0.0494169
TIPRL	ENSG00000143155	27.2515	-1.14531	0.365498	-3.13356	0.00172698	0.0499733
YWHAQ	ENSG00000134308	169.316	-0.911227	0.290512	-3.13662	0.00170905	0.0499733
SRP19	ENSG00000153037	49.5151	-0.93148	0.297386	-3.13223	0.00173485	0.0499733
POLR2G	ENSG00000168002	69.3097	-1.10776	0.353293	-3.13554	0.0017154	0.0499733
RP6-109B7.3	ENSG00000241990	23.9544	1.33327	0.425621	3.13253	0.00173307	0.0499733
TMEM158	ENSG00000249992	74.3986	2.22724	0.713266	3.1226	0.00179262	0.0510848
ID1	ENSG00000125968	162.609	0.990571	0.317235	3.12251	0.00179314	0.0510848
CCT6A	ENSG00000146731	223.462	-1.03419	0.331468	-3.12003	0.0018083	0.0512351
MANF	ENSG00000145050	61.661	-0.895704	0.287759	-3.11269	0.0018539	0.0522417
MPST	ENSG00000128309	67.9838	0.856149	0.275801	3.10423	0.00190775	0.0531811
MRPL39	ENSG00000154719	18.541	-1.46674	0.472294	-3.10557	0.0018991	0.0531811
COA1	ENSG00000106603	45.4663	-0.968721	0.312483	-3.10008	0.00193469	0.0536437
INPP1	ENSG00000151689	16.2873	1.38948	0.448675	3.09684	0.00195594	0.0539445
PI4KA	ENSG00000241973	13.6574	1.53007	0.494331	3.09524	0.00196653	0.0539496
RHBDD2	ENSG00000005486	17.579	-1.35215	0.438239	-3.08541	0.0020327	0.0541121
TLE4	ENSG00000106829	18.6677	-1.28471	0.415711	-3.09039	0.00199893	0.0541121
CIZ1	ENSG00000148337	31.3703	1.11274	0.360687	3.08507	0.00203507	0.0541121
SH3GLB2	ENSG00000148341	23.4707	1.19972	0.38862	3.08713	0.00202102	0.0541121
PPM1F	ENSG00000100034	17.6217	1.55022	0.501516	3.09108	0.00199432	0.0541121
PLXNB2	ENSG00000196576	29.2152	1.12543	0.364267	3.08958	0.00200439	0.0541121
IFI27L1	ENSG00000165948	14.655	1.58676	0.514887	3.08176	0.00205777	0.0544365
PPP1R16A	ENSG00000160972	20.6083	1.45681	0.473456	3.07696	0.00209124	0.054763
PPP2R4	ENSG00000119383	44.5138	1.03627	0.336713	3.0776	0.00208676	0.054763
CALM2	ENSG00000143933	1010.22	-1.13512	0.370238	-3.0659	0.00217013	0.0556348
RICTOR	ENSG00000164327	14.2378	1.54299	0.503141	3.06671	0.00216426	0.0556348
KLF6	ENSG00000067082	63.0822	1.03148	0.336275	3.06736	0.00215962	0.0556348
SPG7	ENSG00000197912	31.1727	1.06581	0.347758	3.0648	0.00217818	0.0556348
SNRPD2	ENSG00000125743	213.612	-0.715871	0.233577	-3.06482	0.00217802	0.0556348
CTSB	ENSG00000164733	106.673	0.714807	0.233829	3.05697	0.00223587	0.0568282
AP006222.2	ENSG00000228463	40.5068	0.923284	0.302954	3.04761	0.00230672	0.0572266
ETV5	ENSG00000244405	28.3825	1.11375	0.365219	3.04954	0.00229194	0.0572266
VDAC1	ENSG00000213585	98.2779	-0.862079	0.282761	-3.0488	0.00229761	0.0572266
RPL12	ENSG00000197958	4794.59	0.705457	0.231133	3.05217	0.00227193	0.0572266
TRMT6	ENSG00000089195	24.9586	-1.13394	0.371908	-3.04897	0.00229625	0.0572266
WBSCR22	ENSG00000071462	74.6911	-0.826464	0.271573	-3.04325	0.00234039	0.0577853
TMEM156	ENSG00000121895	32.7939	-1.07094	0.352561	-3.03759	0.00238478	0.0586022
PPFIBP1	ENSG00000110841	50.193	0.968823	0.319247	3.03471	0.00240764	0.058885
CPNE1	ENSG00000214078	41.7983	-0.960068	0.316747	-3.03102	0.00243726	0.0593295
HIST1H1D	ENSG00000124575	20.5233	-1.33139	0.440021	-3.02573	0.00248033	0.0600959
PGPEP1	ENSG00000130517	12.3908	1.64071	0.543955	3.01626	0.00255917	0.0617177
NDUFA4	ENSG00000189043	316.519	-0.941708	0.31239	-3.01453	0.0025738	0.0617831
BICD2	ENSG00000185963	16.5167	1.5223	0.506688	3.00442	0.0026609	0.0632879
KRT8	ENSG00000170421	25.2071	1.1765	0.391427	3.00567	0.00264997	0.0632879
CPA4	ENSG00000128510	97.809	0.773818	0.258016	2.99911	0.00270769	0.0641068
RAP1A	ENSG00000116473	27.361	-1.12821	0.376959	-2.99292	0.00276324	0.0651246
FH	ENSG00000091483	39.2509	-1.09529	0.366567	-2.98796	0.00280843	0.06589
SRP9	ENSG00000143742	166.589	-0.686257	0.230217	-2.98092	0.00287384	0.0671211
SLC25A1	ENSG00000100075	44.0535	0.914161	0.307103	2.97672	0.00291348	0.0677417
G0S2	ENSG00000123689	133.479	1.91596	0.644508	2.97275	0.0029514	0.0683171
RNF10	ENSG00000022840	21.261	1.25828	0.423872	2.96853	0.00299224	0.0689545
CCT8	ENSG00000156261	85.2916	-1.02524	0.345662	-2.96603	0.00301671	0.0692108
PRRC2B	ENSG00000130723	41.3622	0.96321	0.325114	2.96268	0.00304973	0.0696601
RGP1	ENSG00000107185	13.7166	1.43792	0.486523	2.9555	0.00312167	0.0709085
ACO2	ENSG00000100412	27.9064	1.10151	0.372825	2.9545	0.00313174	0.0709085
MGST1	ENSG00000008394	83.8074	1.16741	0.396033	2.94775	0.00320093	0.07216
CITED4	ENSG00000179862	48.9963	1.16762	0.396689	2.94343	0.00324601	0.0726946
UHRF2	ENSG00000147854	15.2533	1.41735	0.482117	2.93984	0.00328385	0.0726946
IARS	ENSG00000196305	50.9102	0.868496	0.295158	2.94248	0.00325599	0.0726946
GLIPR1	ENSG00000139278	139.627	-0.812907	0.276611	-2.93881	0.00329474	0.0726946
SEPT9	ENSG00000184640	55.6322	0.944999	0.321408	2.94019	0.00328012	0.0726946
TAGLN2	ENSG00000158710	619.295	-0.83678	0.285509	-2.93084	0.00338048	0.073957
DIMT1	ENSG00000086189	21.4658	-1.17445	0.400681	-2.93112	0.00337738	0.073957
CDKN1A	ENSG00000124762	46.8338	3.15033	1.07816	2.92196	0.00347836	0.0749965
MRPL32	ENSG00000106591	72.6443	-0.99748	0.341082	-2.92446	0.00345053	0.0749965
CLU	ENSG00000120885	26.7886	1.171	0.401026	2.92	0.00350028	0.0749965
RPS6	ENSG00000137154	2928.9	0.62636	0.214507	2.92	0.00350032	0.0749965
SEC16A	ENSG00000148396	16.5801	1.64199	0.56197	2.92185	0.00347961	0.0749965
DUSP14	ENSG00000161326	33.6358	-1.03118	0.353423	-2.9177	0.00352628	0.0752419
HMGB3	ENSG00000029993	71.5259	-0.737749	0.25339	-2.91152	0.00359677	0.0763284
PPA1	ENSG00000180817	159.702	-0.826673	0.284015	-2.91066	0.00360665	0.0763284
CACYBP	ENSG00000116161	197.408	-0.8521	0.29325	-2.90571	0.00366416	0.0772303
TMED9	ENSG00000184840	228.826	-0.629693	0.21715	-2.8998	0.00373396	0.0780669
LAMP1	ENSG00000185896	120.538	0.652244	0.224835	2.90099	0.00371981	0.0780669
RHBDD3	ENSG00000100263	15.5819	1.33178	0.460275	2.89344	0.00381053	0.0793477
ABL1	ENSG00000097007	21.4144	1.14593	0.396353	2.89119	0.0038379	0.0795981
SCRIB	ENSG00000180900	16.6615	1.41574	0.490959	2.88363	0.00393122	0.0812087
CRAT	ENSG00000095321	21.5015	1.14149	0.396621	2.87804	0.00400155	0.0823335
NAE1	ENSG00000159593	30.1564	-1.09286	0.380346	-2.87332	0.00406183	0.0832435
SIGMAR1	ENSG00000147955	64.375	0.9582	0.333914	2.86961	0.00410985	0.0838959
TMEM9B	ENSG00000175348	17.6495	-1.30438	0.454968	-2.86698	0.00414415	0.0839353
SPCS2	ENSG00000118363	85.2386	-0.975402	0.34017	-2.8674	0.00413864	0.0839353
SUCLG1	ENSG00000163541	49.5242	-1.0047	0.351099	-2.86159	0.00421527	0.0847746
RP11-160O5.1	ENSG00000263470	28.368	1.24978	0.436778	2.86136	0.00421829	0.0847746
NIT2	ENSG00000114021	30.1376	-1.0111	0.353856	-2.85737	0.00427167	0.0855158
C9orf16	ENSG00000171159	136.367	0.736832	0.258343	2.85215	0.00434247	0.0865234
DCUN1D5	ENSG00000137692	52.913	-0.839927	0.294586	-2.85121	0.00435537	0.0865234
ANP32B	ENSG00000136938	191.813	0.559368	0.196619	2.84494	0.00444201	0.0879078
SMPD4	ENSG00000136699	27.6244	1.0683	0.37628	2.83912	0.00452379	0.088151
C4orf48	ENSG00000243449	89.9414	-0.799699	0.281424	-2.84162	0.00448853	0.088151
HNRNPA2B1	ENSG00000122566	444.978	-0.677645	0.238773	-2.83803	0.00453931	0.088151
RBMX	ENSG00000147274	87.8895	-0.719079	0.253235	-2.83957	0.0045174	0.088151
C16orf80	ENSG00000070761	51.9611	-0.81252	0.286286	-2.83814	0.00453773	0.088151
IGFBP3	ENSG00000146674	17.4067	-1.823	0.642955	-2.83535	0.00457756	0.0884203
EPN2	ENSG00000072134	14.8506	1.54651	0.545571	2.83467	0.00458728	0.0884203
PPP6R2	ENSG00000100239	14.3256	1.47946	0.522245	2.83288	0.00461311	0.0885887
PLEKHB2	ENSG00000115762	30.2123	0.967872	0.342071	2.82945	0.00466285	0.0888857
PRSS23	ENSG00000150687	254.362	-0.907084	0.320494	-2.83027	0.00465092	0.0888857
RPL8	ENSG00000161016	3264.74	0.444049	0.157226	2.82427	0.0047388	0.0900025
NELFB	ENSG00000188986	38.6378	0.895662	0.317564	2.82042	0.00479615	0.0904293
H2AFJ	ENSG00000246705	32.3194	-1.0009	0.354753	-2.82139	0.00478162	0.0904293
PLEKHM2	ENSG00000116786	18.8992	1.16699	0.414499	2.81543	0.00487118	0.0911807
ADSS	ENSG00000035687	22.4519	-1.18553	0.421026	-2.8158	0.00486554	0.0911807
HIST1H2BJ	ENSG00000124635	16.8224	1.29986	0.461963	2.81378	0.00489633	0.0913219
NAA20	ENSG00000173418	103.8	-0.848933	0.302207	-2.80911	0.0049679	0.0923245
CEP250	ENSG00000126001	21.7273	1.37584	0.489996	2.80787	0.00498705	0.0923495
URM1	ENSG00000167118	78.0642	0.76993	0.275054	2.7992	0.00512297	0.0945288
SLC4A2	ENSG00000164889	25.0917	1.01274	0.362774	2.79166	0.00524383	0.0950323
CTTN	ENSG00000085733	42.4729	0.913837	0.32759	2.78957	0.00527777	0.0950323
TRAF7	ENSG00000131653	24.2312	1.06079	0.380276	2.78952	0.00527856	0.0950323
PKN1	ENSG00000123143	32.1581	1.03346	0.370156	2.79196	0.005239	0.0950323
ECH1	ENSG00000104823	35.7826	-1.13664	0.406841	-2.79383	0.0052088	0.0950323
DESI1	ENSG00000100418	60.7049	0.739731	0.264736	2.79422	0.0052025	0.0950323
NCAPH2	ENSG00000025770	27.0231	1.02334	0.366068	2.79549	0.00518217	0.0950323
SNX3	ENSG00000112335	212.049	-0.597363	0.214309	-2.7874	0.00531333	0.0953274
SRP72	ENSG00000174780	42.4652	-0.836905	0.30088	-2.78152	0.00541052	0.0959008
WDR34	ENSG00000119333	144.951	0.707147	0.254032	2.78369	0.00537447	0.0959008
CWC15	ENSG00000150316	67.7158	-0.710915	0.255575	-2.78162	0.00540878	0.0959008
GALNT1	ENSG00000141429	97.9447	-0.755773	0.271764	-2.78099	0.00541927	0.0959008
PLEC	ENSG00000178209	66.1928	0.937316	0.337486	2.77735	0.00548038	0.0959992
THYN1	ENSG00000151500	31.1156	-0.95405	0.343368	-2.7785	0.005461	0.0959992
PXN	ENSG00000089159	38.5038	0.943148	0.339531	2.7778	0.0054728	0.0959992
H3F3A	ENSG00000163041	433.37	-0.735365	0.265178	-2.7731	0.00555252	0.0969354
MGARP	ENSG00000137463	17.3139	-1.53896	0.558548	-2.75528	0.00586413	0.102032
NPM1	ENSG00000181163	950.347	-0.825124	0.299894	-2.75139	0.0059343	0.102907
IAH1	ENSG00000134330	30.8845	-1.04298	0.379809	-2.74606	0.0060316	0.1039
FSTL1	ENSG00000163430	52.4872	-0.793807	0.289052	-2.74624	0.00602825	0.1039
GAS2L1	ENSG00000185340	24.7017	1.19518	0.435474	2.74455	0.00605948	0.104035
ATP5J	ENSG00000154723	224.877	-0.648969	0.236761	-2.74103	0.00612476	0.104808
TNRC6B	ENSG00000100354	20.9847	1.14222	0.417164	2.73807	0.0061801	0.105407
TXNDC12	ENSG00000117862	62.1524	-0.76804	0.28099	-2.73333	0.0062697	0.106585
VEGFA	ENSG00000112715	27.8217	1.04226	0.381821	2.7297	0.00633918	0.107414
UBE3C	ENSG00000009335	27.951	1.06587	0.391051	2.72564	0.00641762	0.108284
LINC00839	ENSG00000185904	12.3523	-1.45609	0.534365	-2.72489	0.00643232	0.108284
ATRAID	ENSG00000138085	73.5636	-0.67175	0.247233	-2.71707	0.00658619	0.110516
TSEN15	ENSG00000198860	20.4103	-1.13277	0.417287	-2.7146	0.00663551	0.110984
GNA11	ENSG00000088256	21.6022	1.12897	0.416783	2.70878	0.00675306	0.112587
MED15	ENSG00000099917	26.1083	1.03592	0.38298	2.70489	0.00683267	0.113549
DUSP5	ENSG00000138166	22.028	1.14674	0.424243	2.70302	0.00687135	0.113584
PSMD8	ENSG00000099341	163.708	-0.598721	0.22153	-2.70267	0.00687857	0.113584
MRPL44	ENSG00000135900	17.7564	1.1415	0.422877	2.69937	0.00694715	0.113791
GJA1	ENSG00000152661	41.4054	-0.928515	0.344168	-2.69785	0.00697888	0.113791
MDK	ENSG00000110492	108.198	-0.783059	0.290217	-2.69818	0.00697196	0.113791
COX6B1	ENSG00000126267	293.519	-0.616596	0.228296	-2.70086	0.00691596	0.113791
RPL7A	ENSG00000148303	1880.82	0.519112	0.192524	2.69634	0.00701051	0.113948
GRN	ENSG00000030582	49.3315	0.767318	0.284749	2.69471	0.00704497	0.114151
SH3BGRL3	ENSG00000142669	1014.87	-0.527302	0.195818	-2.69282	0.00708498	0.114441
RAP1B	ENSG00000127314	73.2757	-0.674455	0.250696	-2.69032	0.00713827	0.114944
LY6K	ENSG00000160886	22.8196	1.07813	0.401149	2.6876	0.00719681	0.115171
MRPL21	ENSG00000197345	85.4021	-0.72899	0.271175	-2.68827	0.00718235	0.115171
COL4A1	ENSG00000187498	75.3332	-0.924326	0.34538	-2.67625	0.00744503	0.118777
SYNJ2	ENSG00000078269	26.81	1.00125	0.37462	2.67272	0.00752398	0.119302
NOSIP	ENSG00000142546	75.6982	-0.818972	0.306395	-2.67293	0.00751927	0.119302
YBX3	ENSG00000060138	203.107	0.557568	0.208702	2.6716	0.00754915	0.119336
SMIM10	ENSG00000184785	14.7691	-1.34466	0.503983	-2.66807	0.00762887	0.12006
VCP	ENSG00000165280	103.647	0.677164	0.253921	2.66683	0.0076571	0.12006
FGD4	ENSG00000139132	17.8231	-1.23603	0.46354	-2.66651	0.00766442	0.12006
UBE2D2	ENSG00000131508	122.592	-0.606517	0.228075	-2.65929	0.00783048	0.121139
IL32	ENSG00000008517	17.4756	-1.39243	0.523343	-2.66065	0.00779906	0.121139
CYBA	ENSG00000051523	116.196	-0.966838	0.363685	-2.65845	0.00785009	0.121139
ITGA3	ENSG00000005884	89.2656	0.800339	0.30072	2.66141	0.00778136	0.121139
MICAL3	ENSG00000243156	14.9616	1.28377	0.482744	2.65932	0.00782989	0.121139
HLA-B	ENSG00000234745	69.8071	0.856444	0.322696	2.65402	0.00795381	0.122375
NDUFS5	ENSG00000168653	294.914	-0.5701	0.21512	-2.65015	0.00804565	0.123422
RP11-680A11.5	ENSG00000257605	13.4267	1.2926	0.487998	2.64878	0.00807827	0.123557
ACP1	ENSG00000143727	134.286	-0.581972	0.220245	-2.64239	0.0082323	0.124083
MAPKAP1	ENSG00000119487	66.2017	0.777383	0.294174	2.6426	0.00822724	0.124083
EAPP	ENSG00000129518	21.7637	-1.1725	0.443583	-2.64324	0.0082116	0.124083
PSMC4	ENSG00000013275	60.2943	-0.81532	0.30852	-2.64268	0.0082253	0.124083
PACSIN2	ENSG00000100266	25.532	1.01739	0.38486	2.64352	0.0082048	0.124083
STRBP	ENSG00000165209	13.8249	1.40882	0.533765	2.63941	0.00830515	0.124818
PAIP2	ENSG00000120727	49.6184	-0.859127	0.326666	-2.62999	0.0085388	0.12762
CCDC107	ENSG00000159884	54.184	0.762415	0.290117	2.62795	0.00859002	0.12762
PAWR	ENSG00000177425	129.851	-0.750868	0.285564	-2.62942	0.00855296	0.12762
UBE2S	ENSG00000108106	450.155	-0.473529	0.180143	-2.62863	0.00857306	0.12762
JOSD1	ENSG00000100221	14.966	1.2928	0.492272	2.6262	0.00863444	0.127913
TUBB2A	ENSG00000137267	29.0681	-0.894215	0.340703	-2.62462	0.00867467	0.128143
PDHB	ENSG00000168291	53.5742	-0.787117	0.300011	-2.62363	0.00869992	0.128151
ASPH	ENSG00000198363	180.395	0.682299	0.260233	2.62188	0.00874458	0.128444
CLTB	ENSG00000175416	110.916	-0.604118	0.230686	-2.61879	0.00882419	0.129183
SBF1	ENSG00000100241	14.4248	1.21171	0.462839	2.618	0.00884476	0.129183
PRKAG2	ENSG00000106617	22.7236	1.03804	0.396788	2.6161	0.00889413	0.129539
TFPI	ENSG00000003436	41.5299	0.99403	0.380753	2.61069	0.00903586	0.12966
IGFBP7	ENSG00000163453	494.978	-1.54403	0.591126	-2.61202	0.00900088	0.12966
TRAM1	ENSG00000067167	54.3236	-0.836193	0.320456	-2.60939	0.00907048	0.12966
TM9SF3	ENSG00000077147	33.2635	-0.932135	0.356577	-2.61412	0.00894572	0.12966
DDB2	ENSG00000134574	16.5027	-1.18786	0.455193	-2.60957	0.00906566	0.12966
IFT43	ENSG00000119650	16.0363	-1.18306	0.452867	-2.61237	0.00899156	0.12966
PIM3	ENSG00000198355	28.9437	0.915986	0.35107	2.60912	0.00907744	0.12966
TIMM17A	ENSG00000134375	95.472	-0.862769	0.331126	-2.60556	0.00917238	0.130274
PACSIN3	ENSG00000165912	23.6932	-1.08634	0.417069	-2.60469	0.00919579	0.130274
MZT1	ENSG00000204899	134.113	0.616142	0.236491	2.60535	0.00917804	0.130274
SUB1	ENSG00000113387	156.835	-0.658219	0.25307	-2.60094	0.00929686	0.131347
FAM20C	ENSG00000177706	24.1853	1.04565	0.403041	2.5944	0.00947555	0.132786
C9orf3	ENSG00000148120	56.5774	0.864146	0.332851	2.5962	0.0094262	0.132786
ATP5O	ENSG00000241837	128.304	-0.758703	0.292399	-2.59475	0.00946599	0.132786
SF3B4	ENSG00000143368	26.1595	-1.06153	0.410103	-2.58846	0.00964057	0.132942
NEK7	ENSG00000151414	16.5138	-1.12298	0.433437	-2.59087	0.00957336	0.132942
PDGFRB	ENSG00000113721	14.3413	-1.4523	0.56046	-2.59126	0.00956254	0.132942
AVPI1	ENSG00000119986	21.3472	1.62502	0.626898	2.59216	0.00953751	0.132942
CNIH1	ENSG00000100528	17.5368	-1.24475	0.480664	-2.58965	0.00960739	0.132942
RABAC1	ENSG00000105404	90.6681	-0.827037	0.3194	-2.58935	0.00961582	0.132942
CAV1	ENSG00000105974	538.793	0.619078	0.239308	2.58695	0.00968293	0.133172
CDC25B	ENSG00000101224	82.237	0.642263	0.24866	2.5829	0.00979739	0.13439
GSR	ENSG00000104687	14.2173	1.26401	0.489901	2.58013	0.00987626	0.135114
A1BG	ENSG00000121410	11.6822	-1.48271	0.575071	-2.57832	0.00992831	0.135469
CCT4	ENSG00000115484	110.132	-0.948736	0.368301	-2.57598	0.00999557	0.135673
C1QBP	ENSG00000108561	251.835	-0.589205	0.22867	-2.57666	0.00997602	0.135673
AGPAT6	ENSG00000158669	17.5755	1.15366	0.448533	2.57208	0.0101091	0.136855
DGCR6L	ENSG00000128185	67.3405	0.766479	0.298639	2.56657	0.0102709	0.138684
CENPA	ENSG00000115163	106.679	-0.683725	0.266512	-2.56545	0.0103041	0.138771
LSM4	ENSG00000130520	553.993	0.515903	0.20144	2.56107	0.010435	0.14017
TBC1D1	ENSG00000065882	18.6702	1.1167	0.436408	2.55885	0.0105018	0.140702
TNFRSF1A	ENSG00000067182	69.4935	0.632118	0.247129	2.55784	0.0105323	0.140748
RPP40	ENSG00000124787	13.1997	-1.25682	0.492806	-2.55033	0.0107621	0.142738
SFRP1	ENSG00000104332	37.1901	0.940786	0.369118	2.54874	0.0108113	0.142738
PTGES2	ENSG00000148334	73.3575	0.724479	0.284115	2.54995	0.0107739	0.142738
LDHA	ENSG00000134333	596.883	-0.882269	0.346192	-2.54849	0.0108189	0.142738
FSTL3	ENSG00000070404	17.2099	-1.2013	0.470902	-2.55106	0.0107396	0.142738
ANKRD11	ENSG00000167522	133.73	0.600869	0.235858	2.54758	0.0108471	0.142747
VARS	ENSG00000204394	25.9116	0.939781	0.369306	2.54472	0.0109365	0.143196
SLC35B2	ENSG00000157593	36.6725	0.817294	0.321095	2.54534	0.0109173	0.143196
TAF7	ENSG00000178913	13.4477	-1.2158	0.479065	-2.53785	0.0111536	0.145671
HNRNPDL	ENSG00000152795	201.865	-0.641738	0.252984	-2.53667	0.0111912	0.145795
GBA	ENSG00000177628	27.3739	0.995638	0.39298	2.53356	0.0112911	0.146728
KDM5B	ENSG00000117139	13.5148	-1.3785	0.544385	-2.53221	0.0113347	0.146775
CAV2	ENSG00000105971	129.717	0.594702	0.234903	2.53169	0.0113514	0.146775
RTN4	ENSG00000115310	220.246	-0.719457	0.284362	-2.53008	0.0114038	0.147062
CD59	ENSG00000085063	275.968	-0.680603	0.269092	-2.52926	0.0114303	0.147062
PSMA5	ENSG00000143106	131.148	-0.59949	0.237196	-2.52741	0.0114909	0.147476
SSSCA1	ENSG00000173465	84.8095	-0.741979	0.29372	-2.52614	0.0115323	0.147641
FAM103A1	ENSG00000169612	36.0251	-0.809077	0.320525	-2.52423	0.0115953	0.148083
TMED2	ENSG00000086598	119.913	-0.563588	0.223445	-2.52227	0.0116599	0.148301
CBR3	ENSG00000159231	53.0925	-0.786713	0.311943	-2.52198	0.0116696	0.148301
POLR2I	ENSG00000105258	108.537	-0.637605	0.253288	-2.51731	0.0118253	0.149913
ISOC2	ENSG00000063241	62.7102	-0.687934	0.273666	-2.51378	0.0119446	0.150688
MT-CYB	ENSG00000198727	1025.64	-0.545036	0.216779	-2.51425	0.0119285	0.150688
RTKN2	ENSG00000182010	12.9337	-1.25552	0.499683	-2.51262	0.0119837	0.150815
CAP1	ENSG00000131236	89.8634	-0.665572	0.266178	-2.50047	0.0124027	0.155488
RCN2	ENSG00000117906	44.0549	-0.800885	0.320432	-2.49939	0.0124406	0.155488
PRMT1	ENSG00000126457	88.6744	-0.642222	0.256964	-2.49927	0.012445	0.155488
UBE2E1	ENSG00000170142	28.6876	-0.852123	0.341292	-2.49676	0.0125335	0.155975
GALK1	ENSG00000108479	14.136	-1.21933	0.488423	-2.49645	0.0125442	0.155975
MDH1	ENSG00000014641	96.4123	-0.959169	0.384634	-2.49372	0.0126414	0.156061
SLC20A1	ENSG00000144136	39.5954	1.18063	0.473309	2.49441	0.0126166	0.156061
KCTD20	ENSG00000112078	29.6721	-0.849503	0.340552	-2.49449	0.0126139	0.156061
PDLIM4	ENSG00000131435	51.5783	-0.781599	0.313565	-2.49262	0.0126804	0.156171
KEAP1	ENSG00000079999	34.6828	0.851733	0.341844	2.49158	0.0127175	0.156257
PRDX6	ENSG00000117592	133.242	-0.675233	0.271486	-2.48717	0.0128764	0.157835
IGF2R	ENSG00000197081	24.2775	0.930167	0.374175	2.48591	0.0129219	0.158019
RALA	ENSG00000006451	53.6876	-0.756202	0.304336	-2.48476	0.0129639	0.158159
ENSA	ENSG00000143420	129.707	-0.648092	0.261223	-2.48099	0.0131019	0.158209
CNRIP1	ENSG00000119865	31.6545	-0.836803	0.33727	-2.4811	0.0130976	0.158209
DAP	ENSG00000112977	59.2676	0.728678	0.293863	2.47965	0.013151	0.158209
SEC61G	ENSG00000132432	91.4295	-0.785407	0.316365	-2.4826	0.0130428	0.158209
DERL2	ENSG00000072849	42.0838	-0.811815	0.327367	-2.47983	0.0131444	0.158209
SGSM3	ENSG00000100359	13.2172	1.21986	0.491606	2.48138	0.0130873	0.158209
MTHFD2	ENSG00000065911	72.9768	-0.653106	0.263551	-2.4781	0.0132085	0.158532
SPRYD7	ENSG00000123178	13.3158	-1.34117	0.54278	-2.47094	0.013476	0.16137
PNKD	ENSG00000127838	101.99	0.624298	0.252802	2.46951	0.0135297	0.16164
ABR	ENSG00000159842	21.5729	0.964117	0.390675	2.46782	0.0135937	0.162031
RABL6	ENSG00000196642	109.662	0.635416	0.25784	2.46438	0.0137251	0.163203
PRDX3	ENSG00000165672	136.105	-0.610119	0.247665	-2.46349	0.0137593	0.163203
NF2	ENSG00000186575	32.2543	0.843768	0.342608	2.46278	0.0137865	0.163203
UBE2D3	ENSG00000109332	87.2073	-0.668105	0.272032	-2.45598	0.0140502	0.165945
HIPK2	ENSG00000064393	21.9187	0.945695	0.385271	2.45462	0.0141033	0.166195
BANF1	ENSG00000175334	214.077	-0.575147	0.234668	-2.4509	0.0142501	0.167544
PNO1	ENSG00000115946	26.6887	-0.891965	0.364348	-2.44811	0.0143606	0.168461
ANTXR2	ENSG00000163297	14.2162	1.31813	0.5388	2.44642	0.0144282	0.168654
HSP90AA1	ENSG00000080824	419.673	-0.734693	0.300356	-2.44607	0.0144421	0.168654
HSPA5	ENSG00000044574	107.609	-0.705384	0.28871	-2.44323	0.0145565	0.169608
SMARCC1	ENSG00000173473	28.8055	-0.839147	0.343723	-2.44135	0.0146325	0.17011
PRADC1	ENSG00000135617	33.4405	-0.809273	0.332274	-2.43556	0.0148688	0.172446
MRPL22	ENSG00000082515	92.0626	-0.689414	0.28315	-2.4348	0.0148999	0.172446
MED22	ENSG00000148297	12.9434	1.20649	0.495969	2.4326	0.0149909	0.173113
RPLP0	ENSG00000089157	2092.33	0.420135	0.172802	2.43131	0.0150443	0.173344
IER3	ENSG00000137331	100.989	1.08303	0.445818	2.4293	0.0151279	0.173921
KRT18	ENSG00000111057	353.589	-0.850111	0.350136	-2.42795	0.0151845	0.174185
HMGB1	ENSG00000189403	312.166	-0.520193	0.21438	-2.4265	0.0152454	0.174498
SPCS1	ENSG00000114902	122.157	-0.878511	0.362481	-2.4236	0.0153674	0.175506
SPTSSA	ENSG00000165389	32.7957	-0.929905	0.384319	-2.41962	0.0155368	0.177051
TMEM147	ENSG00000105677	98.4233	-0.611605	0.252977	-2.41764	0.0156216	0.177628
AK2	ENSG00000004455	85.6301	-0.688976	0.285419	-2.41391	0.0157825	0.178671
CCDC80	ENSG00000091986	78.3319	-0.767053	0.317758	-2.41395	0.0157805	0.178671
CFL1	ENSG00000172757	1217.91	-0.634291	0.262852	-2.41312	0.0158168	0.178671
RDH14	ENSG00000240857	18.9238	-1.01506	0.420955	-2.41133	0.0158944	0.178769
EMP3	ENSG00000142227	224.558	-0.584991	0.242585	-2.41149	0.0158876	0.178769
ELOVL5	ENSG00000012660	27.22	0.902457	0.374682	2.40859	0.0160142	0.179726
PGF	ENSG00000119630	16.912	1.52811	0.634743	2.40745	0.0160643	0.179899
CCDC104	ENSG00000163001	43.8843	-0.801058	0.333165	-2.40439	0.0161994	0.180244
SEC61A1	ENSG00000058262	86.9442	0.739408	0.307446	2.405	0.0161724	0.180244
SKP1	ENSG00000113558	191.146	-0.80659	0.335337	-2.40531	0.0161586	0.180244
TSEN34	ENSG00000170892	72.9523	-0.649231	0.270221	-2.40259	0.0162794	0.180746
HPS4	ENSG00000100099	13.2794	1.32208	0.550694	2.40076	0.0163612	0.181266
MRPL9	ENSG00000143436	73.8101	-0.653381	0.272345	-2.39909	0.0164359	0.181706
RNASEH2C	ENSG00000172922	92.3904	-0.608915	0.254167	-2.39573	0.0165874	0.182627
SDHD	ENSG00000204370	53.151	-0.858927	0.358648	-2.3949	0.0166249	0.182627
ZNF768	ENSG00000169957	12.4549	1.2834	0.535841	2.39512	0.0166151	0.182627
ALG5	ENSG00000120697	14.3678	-1.12491	0.470026	-2.39329	0.0166978	0.183041
NOP16	ENSG00000048162	56.8647	-0.766367	0.320354	-2.39225	0.0167454	0.183174
TCEAL8	ENSG00000180964	51.9859	-0.901731	0.377139	-2.39098	0.0168035	0.183424
C1orf131	ENSG00000143633	12.6972	-1.1861	0.496497	-2.38894	0.0168973	0.183674
PRRC2A	ENSG00000204469	55.8573	0.706561	0.295761	2.38896	0.016896	0.183674
PDLIM1	ENSG00000107438	72.0601	-0.884096	0.370366	-2.38709	0.0169824	0.184213
TRIM7	ENSG00000146054	21.3831	-0.997795	0.418658	-2.38332	0.0171575	0.184951
MCM5	ENSG00000100297	25.172	0.871982	0.365796	2.3838	0.017135	0.184951
CBY1	ENSG00000100211	28.0205	0.847362	0.355323	2.38476	0.0170901	0.184951
RPL31	ENSG00000071082	811.524	0.451767	0.189781	2.38046	0.017291	0.186004
IPO5	ENSG00000065150	59.2826	0.710867	0.299223	2.37571	0.0175154	0.188027
EIF4E2	ENSG00000135930	64.6765	-0.674269	0.284164	-2.37281	0.0176532	0.188892
PSTK	ENSG00000179988	20.1278	-0.994808	0.419579	-2.37097	0.0177417	0.188892
BORA	ENSG00000136122	18.2287	1.21759	0.513504	2.37113	0.0177337	0.188892
MT2A	ENSG00000125148	2333.38	-0.518133	0.218439	-2.37198	0.0176929	0.188892
RPN2	ENSG00000118705	82.9294	-0.587903	0.248109	-2.36954	0.0178104	0.189235
PMF1	ENSG00000160783	50.8406	-0.694451	0.293319	-2.36756	0.0179059	0.189473
DIS3	ENSG00000083520	19.238	0.985095	0.415986	2.3681	0.0178798	0.189473
HIGD1A	ENSG00000181061	24.4686	-0.972524	0.410907	-2.36678	0.0179438	0.189488
STK32C	ENSG00000165752	16.4364	1.09016	0.461417	2.36264	0.0181452	0.190909
RHNO1	ENSG00000171792	61.3183	-0.694586	0.294004	-2.3625	0.018152	0.190909
GEMIN6	ENSG00000152147	25.9398	-0.893217	0.378358	-2.36077	0.0182371	0.191415
ATG3	ENSG00000144848	75.5541	-0.635717	0.269526	-2.35865	0.0183417	0.191546
MTHFD1L	ENSG00000120254	39.6835	0.784752	0.332766	2.35827	0.0183604	0.191546
LSM14A	ENSG00000257103	26.6648	-0.870391	0.36902	-2.35866	0.0183413	0.191546
TPD52	ENSG00000076554	23.0192	-0.950675	0.403527	-2.35591	0.0184772	0.192378
ARL6IP1	ENSG00000170540	112.938	-0.839294	0.35663	-2.3534	0.0186025	0.193295
CDC42EP3	ENSG00000163171	47.4403	-0.800239	0.340956	-2.34704	0.0189231	0.195841
PFKP	ENSG00000067057	56.76	0.633472	0.269849	2.3475	0.0188998	0.195841
DDX19A	ENSG00000168872	25.0048	0.921987	0.393523	2.3429	0.0191343	0.197632
ESYT2	ENSG00000117868	20.8049	1.00337	0.428779	2.34005	0.0192809	0.197963
HK1	ENSG00000156515	28.2453	0.805567	0.344217	2.34028	0.0192691	0.197963
MPHOSPH6	ENSG00000135698	30.7951	-0.824551	0.352168	-2.34136	0.0192138	0.197963
NUDT16L1	ENSG00000168101	17.1877	-1.09512	0.468154	-2.33922	0.0193238	0.198012
LARP6	ENSG00000166173	89.3192	0.675625	0.289061	2.33731	0.019423	0.198635
PDLIM7	ENSG00000196923	75.5853	-0.63928	0.273689	-2.33579	0.0195022	0.198662
ZFAND6	ENSG00000086666	40.0341	-0.815496	0.349131	-2.33579	0.0195022	0.198662
STIM2	ENSG00000109689	12.8382	1.18418	0.507699	2.33245	0.0196771	0.199269
H2AFV	ENSG00000105968	288.7	-0.69753	0.298973	-2.33309	0.0196434	0.199269
PUS1	ENSG00000177192	18.1857	1.10089	0.47193	2.33274	0.0196621	0.199269
EIF4A3	ENSG00000141543	50.1561	-0.693978	0.297957	-2.32912	0.0198528	0.200436
POLR3H	ENSG00000100413	68.4887	0.649006	0.278687	2.3288	0.0198696	0.200436
RPL17	ENSG00000265681	148.616	0.798093	0.343176	2.32561	0.0200393	0.201755
MAP3K11	ENSG00000173327	13.113	1.11073	0.477958	2.3239	0.0201308	0.201892
SUN2	ENSG00000100242	23.6764	0.922815	0.397055	2.32415	0.0201174	0.201892
MKKS	ENSG00000125863	136.222	0.520616	0.224446	2.31956	0.0203644	0.203841
FHL1	ENSG00000022267	31.0585	-0.804827	0.347272	-2.31757	0.0204729	0.204532
STT3B	ENSG00000163527	15.8092	-1.05266	0.454641	-2.31536	0.0205933	0.204767
COL8A1	ENSG00000144810	14.0499	-1.13835	0.491707	-2.3151	0.0206075	0.204767
NINJ1	ENSG00000131669	54.8293	0.846593	0.365759	2.31462	0.0206339	0.204767
PSMA4	ENSG00000041357	160.488	-0.821125	0.354813	-2.31424	0.0206544	0.204767
TCEAL3	ENSG00000196507	119.485	0.566848	0.245383	2.31006	0.0208849	0.206264
DDX11	ENSG00000013573	17.009	1.17353	0.507851	2.31077	0.0208455	0.206264
UBE2D1	ENSG00000072401	24.4655	-0.945493	0.40968	-2.30788	0.0210057	0.206803
AP2S1	ENSG00000042753	568.616	-0.413779	0.179309	-2.30764	0.0210193	0.206803
RAB18	ENSG00000099246	37.6624	-0.739627	0.320744	-2.30597	0.0211124	0.207202
PFDN4	ENSG00000101132	60.2334	-0.932228	0.404353	-2.30548	0.0211398	0.207202
SSFA2	ENSG00000138434	34.8035	0.876439	0.381574	2.29691	0.0216241	0.210591
CAPZA2	ENSG00000198898	47.5593	-0.72492	0.315472	-2.29789	0.0215681	0.210591
PSMA7	ENSG00000101182	826.758	-0.546207	0.237764	-2.29726	0.0216039	0.210591
TMEM184B	ENSG00000198792	23.1115	0.854389	0.372042	2.29649	0.021648	0.210591
S100A11	ENSG00000163191	268.044	-0.76013	0.331161	-2.29535	0.0217131	0.210828
TBC1D10B	ENSG00000169221	12.3894	1.14237	0.49796	2.2941	0.0217845	0.211127
PEX26	ENSG00000215193	15.1481	1.0274	0.448	2.2933	0.021831	0.211182
ENO2	ENSG00000111674	19.1318	0.968604	0.422829	2.29077	0.0219768	0.211816
DSTN	ENSG00000125868	398.881	-0.472634	0.206324	-2.29074	0.0219782	0.211816
DCTPP1	ENSG00000179958	85.3679	-0.595994	0.26033	-2.28938	0.0220575	0.212032
COX11	ENSG00000166260	29.7754	-0.778128	0.33995	-2.28895	0.0220824	0.212032
MPC1	ENSG00000060762	24.8649	-0.885453	0.386962	-2.28822	0.0221248	0.212047
UCK2	ENSG00000143179	25.9545	-0.88028	0.385187	-2.28533	0.0222933	0.212505
COMMD1	ENSG00000173163	44.1073	-0.814568	0.356548	-2.2846	0.0223365	0.212505
REEP5	ENSG00000129625	72.353	-0.759452	0.332219	-2.286	0.0222545	0.212505
RAC1	ENSG00000136238	453.029	-0.445152	0.19484	-2.2847	0.0223302	0.212505
C4orf46	ENSG00000205208	18.2772	-1.04907	0.459992	-2.28064	0.02257	0.212774
REPIN1	ENSG00000214022	13.9995	1.18035	0.517474	2.28099	0.0225492	0.212774
GOLGA7	ENSG00000147533	28.1716	-0.809743	0.354664	-2.28313	0.0224228	0.212774
TMX1	ENSG00000139921	22.3227	-0.878804	0.384993	-2.28265	0.0224512	0.212774
EIF3K	ENSG00000178982	175.356	-0.590198	0.258664	-2.28171	0.0225062	0.212774
NDUFS3	ENSG00000213619	72.5323	-0.583475	0.256028	-2.27895	0.0226703	0.213331
EIF3D	ENSG00000100353	90.1625	0.644419	0.283059	2.27662	0.0228088	0.214246
CHIC2	ENSG00000109220	35.7536	-1.01794	0.447618	-2.27414	0.0229579	0.215256
PSMD6	ENSG00000163636	37.4845	-1.0632	0.467837	-2.27258	0.0230516	0.215745
PHLDA3	ENSG00000174307	28.5084	1.11008	0.489214	2.26911	0.0232617	0.216951
CMTM6	ENSG00000091317	30.5109	-0.775183	0.342044	-2.26632	0.0234316	0.216951
PSMA1	ENSG00000129084	89.6442	-0.634874	0.280073	-2.26681	0.0234016	0.216951
KPNB1	ENSG00000108424	147.659	0.475801	0.209775	2.26814	0.0233204	0.216951
MAFG	ENSG00000197063	43.7902	0.760432	0.335376	2.2674	0.0233657	0.216951
BCR	ENSG00000186716	12.447	1.17326	0.517551	2.26695	0.023393	0.216951
CRBN	ENSG00000113851	14.1567	-1.17013	0.516725	-2.26451	0.0235426	0.217203
ALDH3A2	ENSG00000072210	14.5718	1.06015	0.468065	2.26496	0.0235151	0.217203
CDK2AP2	ENSG00000167797	43.4667	-0.697627	0.308506	-2.26131	0.0237399	0.217619
ITM2B	ENSG00000136156	49.1455	-0.912928	0.403761	-2.26106	0.0237555	0.217619
TK1	ENSG00000167900	144.962	-0.527377	0.233191	-2.26156	0.0237243	0.217619
RAD23A	ENSG00000179262	205.598	0.590215	0.260837	2.26277	0.0236498	0.217619
RPL37A	ENSG00000197756	1500.4	0.677933	0.300349	2.25715	0.0239987	0.219351
CFL2	ENSG00000165410	47.5977	-0.700332	0.310433	-2.25599	0.0240715	0.219351
MIEF1	ENSG00000100335	17.2402	0.966308	0.428269	2.25631	0.024051	0.219351
MDH2	ENSG00000146701	73.7781	-0.562814	0.249674	-2.25419	0.0241841	0.21999
TOMM22	ENSG00000100216	187.218	0.450479	0.20057	2.246	0.0247041	0.224327
EBNA1BP2	ENSG00000117395	234.902	-0.502051	0.223788	-2.24343	0.0248694	0.224453
RRP15	ENSG00000067533	24.4065	-0.88157	0.39285	-2.24404	0.0248301	0.224453
BZW2	ENSG00000136261	24.6931	-0.922348	0.411196	-2.24309	0.0248912	0.224453
PVRL2	ENSG00000130202	15.7561	-1.01981	0.454501	-2.2438	0.0248453	0.224453
SPATS2	ENSG00000123352	35.125	0.724974	0.323671	2.23985	0.0251009	0.225502
KLHDC2	ENSG00000165516	17.2772	-1.05597	0.471566	-2.23928	0.0251377	0.225502
NME1	ENSG00000239672	380.955	-0.563084	0.251458	-2.23928	0.0251379	0.225502
TMEM127	ENSG00000135956	11.9724	1.23015	0.549606	2.23825	0.025205	0.225713
DDX17	ENSG00000100201	46.1979	0.689613	0.308304	2.2368	0.0252995	0.226169
TSPO	ENSG00000100300	413.176	0.492468	0.220247	2.23598	0.0253531	0.226258
DZIP1	ENSG00000134874	14.9688	1.00949	0.451755	2.23459	0.0254444	0.226682
CTHRC1	ENSG00000164932	15.8109	-1.14258	0.511717	-2.23283	0.0255602	0.227172
TMED10	ENSG00000170348	40.8006	-0.811903	0.363686	-2.23242	0.0255869	0.227172
MRPL42	ENSG00000198015	30.4378	-0.830646	0.372513	-2.22985	0.0257576	0.228296
DCXR	ENSG00000169738	73.2226	-0.611	0.27435	-2.22708	0.0259418	0.229537
UGP2	ENSG00000169764	30.2287	-0.918904	0.412945	-2.22525	0.0260648	0.229776
CCNB1	ENSG00000134057	146.999	-0.812442	0.365198	-2.22466	0.0261038	0.229776
CDKN2AIPNL	ENSG00000237190	45.0587	-0.680273	0.305873	-2.22403	0.0261461	0.229776
TMEM138	ENSG00000149483	21.5262	-0.972218	0.436817	-2.22568	0.0260353	0.229776
MPLKIP	ENSG00000168303	100.255	-0.755624	0.339927	-2.2229	0.0262225	0.230057
RPL26L1	ENSG00000037241	65.4665	-0.678386	0.305273	-2.22223	0.0262678	0.230066
SCCPDH	ENSG00000143653	31.6727	-0.813554	0.366547	-2.2195	0.0264524	0.230575
USP36	ENSG00000055483	13.3584	1.11958	0.504453	2.2194	0.0264594	0.230575
ATP6V1E1	ENSG00000131100	77.7645	0.585454	0.263667	2.22043	0.0263895	0.230575
HMOX1	ENSG00000100292	20.7828	1.04473	0.471279	2.21679	0.0266373	0.231736
UBE2H	ENSG00000186591	32.5015	0.772527	0.348722	2.21531	0.0267389	0.231842
HMGXB4	ENSG00000100281	30.9062	0.790169	0.35663	2.21566	0.026715	0.231842
AGPAT1	ENSG00000204310	30.7345	0.756959	0.341812	2.21455	0.0267911	0.231906
MDFIC	ENSG00000135272	16.5847	0.984623	0.444837	2.21344	0.0268671	0.232176
ETFA	ENSG00000140374	33.9618	-0.843245	0.381148	-2.21238	0.0269403	0.232421
CHD1	ENSG00000153922	27.7834	-0.802449	0.36295	-2.21091	0.0270422	0.232913
EFHD2	ENSG00000142634	52.8018	0.642576	0.291147	2.20706	0.0273102	0.234055
EIF4G1	ENSG00000114867	130.592	0.63024	0.285526	2.20729	0.0272938	0.234055
DNM2	ENSG00000079805	23.8328	1.00706	0.456265	2.20718	0.0273013	0.234055
SH2B3	ENSG00000111252	30.7086	0.763149	0.346082	2.20511	0.0274463	0.234061
KPNA2	ENSG00000182481	193.786	-0.830177	0.376465	-2.20519	0.0274408	0.234061
IFNGR2	ENSG00000159128	25.0908	-0.931546	0.422238	-2.20621	0.0273693	0.234061
BCAS4	ENSG00000124243	17.5067	-1.05	0.476715	-2.20256	0.0276255	0.235202
NSL1	ENSG00000117697	18.3616	-0.949644	0.431533	-2.20063	0.0277623	0.235979
CNN3	ENSG00000117519	109.772	-0.626445	0.285524	-2.19402	0.0282338	0.239203
KDM5C	ENSG00000126012	13.0848	1.35962	0.619664	2.19412	0.0282264	0.239203
UHMK1	ENSG00000152332	16.5699	-1.02096	0.465657	-2.19251	0.0283425	0.239732
SEC62	ENSG00000008952	59.5128	-0.581904	0.265767	-2.18953	0.0285583	0.239791
SRI	ENSG00000075142	103.804	-0.60373	0.275532	-2.19114	0.0284414	0.239791
EBAG9	ENSG00000147654	17.2369	-1.00612	0.459578	-2.18922	0.0285806	0.239791
ANXA7	ENSG00000138279	64.1226	-0.620123	0.283138	-2.19018	0.0285112	0.239791
TMEM109	ENSG00000110108	33.3695	-0.724753	0.330894	-2.19029	0.0285035	0.239791
PTTG1IP	ENSG00000183255	67.8757	-0.566599	0.258906	-2.18844	0.0286376	0.239881
PAPSS2	ENSG00000198682	19.7235	0.877397	0.401415	2.18576	0.0288334	0.240743
CCT2	ENSG00000166226	122.831	-0.51853	0.237195	-2.18609	0.0288089	0.240743
RNASEH1	ENSG00000171865	46.7836	-0.665289	0.305095	-2.1806	0.0292133	0.241966
PDCD10	ENSG00000114209	26.3379	-0.811276	0.371707	-2.18257	0.0290676	0.241966
NDUFAF2	ENSG00000164182	72.3089	-0.56985	0.261101	-2.18249	0.0290734	0.241966
PARD3	ENSG00000148498	15.0752	1.02682	0.47084	2.18082	0.0291965	0.241966
VASP	ENSG00000125753	27.2405	-0.763762	0.350177	-2.18108	0.0291777	0.241966
RECK	ENSG00000122707	18.3587	-0.890209	0.40848	-2.17932	0.0293078	0.241976
LITAF	ENSG00000189067	15.7266	-1.03258	0.473755	-2.17957	0.0292892	0.241976
MIR4435-1HG	ENSG00000172965	120.225	0.659727	0.30303	2.1771	0.0294733	0.24257
HNRNPH3	ENSG00000096746	86.738	-0.540847	0.248407	-2.17726	0.0294611	0.24257
SLFN5	ENSG00000166750	14.4307	1.12667	0.517989	2.17509	0.0296231	0.243417
EMP1	ENSG00000134531	13.3826	1.02578	0.471791	2.17422	0.0296889	0.243472
HSBP1	ENSG00000230989	301.111	-0.464248	0.21357	-2.17375	0.0297238	0.243472
COMMD10	ENSG00000145781	12.1025	-1.28012	0.589337	-2.17214	0.0298451	0.243715
NUDT2	ENSG00000164978	27.2024	0.764172	0.351811	2.17211	0.0298475	0.243715
KRI1	ENSG00000129347	20.4238	0.872449	0.401789	2.17141	0.0299001	0.243761
UBE2Z	ENSG00000159202	44.3107	0.678561	0.312607	2.17065	0.0299575	0.243846
IER5	ENSG00000162783	21.8223	0.990947	0.457144	2.16769	0.030182	0.24454
TKT	ENSG00000163931	169.439	0.518221	0.239205	2.16643	0.0302786	0.24454
MSC	ENSG00000178860	12.0932	1.47154	0.678503	2.16881	0.0300974	0.24454
RECQL4	ENSG00000160957	13.2674	1.03583	0.478055	2.16676	0.0302529	0.24454
LMO7	ENSG00000136153	66.9206	-0.678299	0.312923	-2.16762	0.0301877	0.24454
SOD2	ENSG00000112096	31.5431	0.737753	0.34085	2.16445	0.0304299	0.24538
NDUFC1	ENSG00000109390	88.9371	-0.56002	0.258922	-2.16289	0.0305496	0.245963
KANK2	ENSG00000197256	21.2883	0.930279	0.430279	2.16204	0.0306154	0.24611
TNS3	ENSG00000136205	26.9861	-0.799706	0.370168	-2.16039	0.0307425	0.246749
DLGAP1-AS1	ENSG00000177337	14.0912	1.02636	0.4757	2.15759	0.03096	0.248111
BUB3	ENSG00000154473	212.866	-0.61394	0.284648	-2.15684	0.0310183	0.248194
ACBD6	ENSG00000135847	29.8943	-0.740732	0.343568	-2.156	0.0310838	0.248335
CNOT4	ENSG00000080802	16.5473	0.933918	0.43382	2.15278	0.0313361	0.249966
U2AF1	ENSG00000160201	166.912	-0.532659	0.247852	-2.1491	0.0316263	0.251893
AHI1	ENSG00000135541	25.7748	0.865232	0.402873	2.14765	0.0317413	0.252035
SNRPB2	ENSG00000125870	37.8205	-0.849145	0.395327	-2.14796	0.031717	0.252035
GLYR1	ENSG00000140632	16.7498	0.927784	0.432255	2.14638	0.0318426	0.252067
SUMO3	ENSG00000184900	75.6753	-0.563214	0.262366	-2.14667	0.0318192	0.252067
RPP25L	ENSG00000164967	25.7327	0.860734	0.401319	2.14476	0.031972	0.252706
HAUS8	ENSG00000131351	17.3379	-0.971883	0.453352	-2.14377	0.0320512	0.252946
LOXL3	ENSG00000115318	33.1238	-1.04346	0.487153	-2.14196	0.0321971	0.253326
C9orf69	ENSG00000238227	25.6348	0.785315	0.366564	2.14237	0.0321639	0.253326
TMEM70	ENSG00000175606	25.2271	-0.912891	0.426404	-2.1409	0.0322818	0.253608
PIF1	ENSG00000140451	53.1006	0.766247	0.358261	2.13879	0.0324525	0.254563
PDCD5	ENSG00000105185	268.148	-0.478299	0.223978	-2.13547	0.0327225	0.256293
CMSS1	ENSG00000184220	67.0746	-0.575423	0.269623	-2.13418	0.0328282	0.256733
SNRPE	ENSG00000182004	175.571	-0.425646	0.199723	-2.13118	0.0330742	0.258267
SEPW1	ENSG00000178980	52.8512	-0.614819	0.289001	-2.12739	0.0333873	0.260286
TXN2	ENSG00000100348	124.431	0.502973	0.236488	2.12684	0.0334331	0.260286
ADI1	ENSG00000182551	122.379	-0.534958	0.252116	-2.12187	0.0338484	0.26118
HYAL2	ENSG00000068001	13.206	-1.10308	0.519778	-2.12221	0.0338204	0.26118
FIP1L1	ENSG00000145216	18.957	-0.940685	0.442927	-2.12379	0.0336874	0.26118
KIF20A	ENSG00000112984	20.2519	-0.846515	0.399037	-2.1214	0.0338884	0.26118
LMAN2	ENSG00000169223	76.8213	-0.545742	0.257255	-2.12141	0.0338875	0.26118
POLR3A	ENSG00000148606	16.1441	1.0345	0.486994	2.12426	0.0336481	0.26118
SDHAF2	ENSG00000167985	31.0612	-0.785261	0.370292	-2.12065	0.0339509	0.26118
UBE2G1	ENSG00000132388	16.4903	-0.90829	0.428208	-2.12114	0.0339097	0.26118
AVEN	ENSG00000169857	16.1695	-0.923706	0.436116	-2.11803	0.0341726	0.262496
EPB41L2	ENSG00000079819	22.1701	0.857718	0.405219	2.11668	0.0342872	0.262954
DBNL	ENSG00000136279	33.4489	-0.727871	0.344037	-2.11567	0.0343725	0.262954
NSMCE4A	ENSG00000107672	29.6518	-0.778968	0.368213	-2.11554	0.0343844	0.262954
MEAF6	ENSG00000163875	50.6927	-0.649429	0.30709	-2.11478	0.0344483	0.263055
TBCA	ENSG00000171530	124.323	-0.466481	0.221139	-2.10945	0.0349058	0.263833
CSNK1A1	ENSG00000113712	60.3683	-0.546291	0.258836	-2.11057	0.0348097	0.263833
PBK	ENSG00000168078	44.4923	-0.734382	0.348095	-2.10972	0.0348826	0.263833
MORF4L1	ENSG00000185787	170.51	-0.548558	0.260049	-2.10944	0.0349064	0.263833
PSMD12	ENSG00000197170	46.5631	-0.822853	0.389832	-2.11079	0.0347904	0.263833
NCLN	ENSG00000125912	31.0688	0.784948	0.371769	2.11139	0.034739	0.263833
URI1	ENSG00000105176	30.2225	-0.803653	0.380766	-2.11062	0.0348051	0.263833
SDHC	ENSG00000143252	74.7161	-0.625943	0.297013	-2.10746	0.0350778	0.264358
SAMD4B	ENSG00000179134	20.0064	0.910351	0.431962	2.10748	0.035076	0.264358
DNAJB11	ENSG00000090520	53.1633	-0.650576	0.308852	-2.10643	0.035167	0.264646
LINC00493	ENSG00000232388	70.1156	-0.540104	0.256649	-2.10444	0.0353398	0.265561
LAMP2	ENSG00000005893	39.6352	0.699339	0.33244	2.10366	0.0354084	0.265588
HSF1	ENSG00000185122	49.873	0.63626	0.302516	2.10323	0.0354459	0.265588
APEX2	ENSG00000169188	21.3987	0.8451	0.402613	2.09904	0.0358135	0.267569
DGCR2	ENSG00000070413	12.8395	1.18879	0.566255	2.0994	0.035782	0.267569
PTGR1	ENSG00000106853	56.0324	0.753371	0.359081	2.09805	0.0359004	0.267701
DTD1	ENSG00000125821	53.3514	-0.618982	0.295081	-2.09767	0.0359344	0.267701
RRAS2	ENSG00000133818	43.8628	-0.723239	0.344902	-2.09694	0.0359987	0.267795
HIBADH	ENSG00000106049	20.0798	-0.868507	0.4152	-2.09178	0.0364582	0.269233
TMEM179B	ENSG00000185475	40.1271	-0.740924	0.354391	-2.0907	0.0365554	0.269233
NDUFC2	ENSG00000151366	202.679	-0.563127	0.268983	-2.09354	0.036301	0.269233
MT1E	ENSG00000169715	124.369	-0.602376	0.287768	-2.09327	0.0363248	0.269233
ACTG1	ENSG00000184009	1455.42	-0.366031	0.174979	-2.09185	0.0364516	0.269233
IER2	ENSG00000160888	35.1513	0.793345	0.379244	2.09191	0.0364465	0.269233
CDC42EP1	ENSG00000128283	81.5707	0.747069	0.357297	2.09089	0.0365379	0.269233
ANK1	ENSG00000029534	13.3966	1.05105	0.502875	2.09009	0.0366101	0.269253
PPP2CA	ENSG00000113575	37.9957	-0.767411	0.367424	-2.08863	0.0367414	0.269836
ILF2	ENSG00000143621	102.12	-0.645407	0.309214	-2.08725	0.0368652	0.270006
BCL2L12	ENSG00000126453	55.1859	-0.662456	0.317388	-2.08721	0.0368688	0.270006
ZNF106	ENSG00000103994	39.4563	0.659986	0.316474	2.08544	0.0370297	0.270421
CD3EAP	ENSG00000117877	21.9922	-0.972711	0.466321	-2.08593	0.0369853	0.270421
C6orf1	ENSG00000186577	49.903	0.652329	0.312945	2.08448	0.0371165	0.270674
ABL2	ENSG00000143322	33.4443	0.861268	0.414071	2.08	0.0375253	0.273095
RPLP1	ENSG00000137818	3533.19	0.500765	0.240788	2.07969	0.0375538	0.273095
ZMIZ2	ENSG00000122515	11.9972	1.21568	0.58504	2.07795	0.0377141	0.273876
NUCKS1	ENSG00000069275	240.853	-0.575965	0.277336	-2.07678	0.037822	0.274276
CHMP1A	ENSG00000131165	37.5159	0.646109	0.31139	2.07492	0.0379941	0.275139
XRCC6	ENSG00000196419	160.249	0.580776	0.280463	2.07078	0.0383794	0.277542
BBX	ENSG00000114439	74.3335	-0.650392	0.314436	-2.06844	0.0385986	0.278738
ADORA2B	ENSG00000170425	27.608	0.72637	0.35136	2.06731	0.0387053	0.27912
NIPSNAP3A	ENSG00000136783	15.0452	-1.12286	0.543506	-2.06596	0.0388323	0.279534
MBD3	ENSG00000071655	38.1158	0.672245	0.325455	2.06555	0.0388706	0.279534
DDIT4	ENSG00000168209	42.5636	1.70144	0.823959	2.06496	0.0389266	0.279549
PDE6D	ENSG00000156973	13.2306	-1.00802	0.488864	-2.06196	0.0392116	0.281206
UBE2V2	ENSG00000169139	74.8921	-0.604317	0.293279	-2.06055	0.0393459	0.281391
TRAF2	ENSG00000127191	15.6499	0.9413	0.456788	2.06069	0.0393325	0.281391
NBPF1	ENSG00000219481	15.8428	-0.928071	0.451127	-2.05723	0.0396643	0.283278
EIF2S2	ENSG00000125977	313.806	-0.438358	0.21335	-2.05464	0.0399136	0.284666
TMEM165	ENSG00000134851	37.8585	-0.699334	0.340719	-2.05253	0.0401186	0.285735
PMM1	ENSG00000100417	30.3649	0.794672	0.387332	2.05166	0.040203	0.285943
ATXN2L	ENSG00000168488	33.8171	0.736001	0.35923	2.04883	0.040479	0.287512
MCM2	ENSG00000073111	16.0477	0.936757	0.457528	2.04743	0.0406157	0.287518
PPP1R2	ENSG00000184203	26.1282	-0.766473	0.374716	-2.04548	0.040808	0.287518
PIR	ENSG00000087842	11.9618	1.07251	0.52419	2.04603	0.0407532	0.287518
IMPAD1	ENSG00000104331	14.8046	-0.922169	0.450953	-2.04494	0.0408613	0.287518
KIAA1279	ENSG00000198954	25.2273	-0.78144	0.382357	-2.04374	0.040979	0.287518
UBE2L6	ENSG00000156587	16.7604	-0.980516	0.478818	-2.04778	0.0405813	0.287518
JKAMP	ENSG00000050130	13.8389	-0.949827	0.464099	-2.04661	0.0406968	0.287518
CRIP2	ENSG00000182809	38.9351	-0.813577	0.398063	-2.04384	0.0409694	0.287518
VIMP	ENSG00000131871	89.8613	-0.615544	0.30113	-2.04411	0.0409424	0.287518
RPA3	ENSG00000106399	135.817	-0.652718	0.31948	-2.04306	0.0410461	0.2876
EIF4H	ENSG00000106682	86.0431	-0.476969	0.233886	-2.03933	0.0414174	0.288254
ASAP1	ENSG00000153317	44.1638	0.753797	0.369304	2.04113	0.0412381	0.288254
COX15	ENSG00000014919	19.2334	0.866712	0.424945	2.03959	0.0413913	0.288254
SREBF1	ENSG00000072310	17.0283	0.893044	0.437802	2.03983	0.041367	0.288254
PLAUR	ENSG00000011422	51.0309	-0.638924	0.313182	-2.0401	0.0413402	0.288254
STK11	ENSG00000118046	23.8759	0.781138	0.383265	2.03811	0.0415385	0.288709
NUDC	ENSG00000090273	195.986	-0.467592	0.229558	-2.03692	0.0416579	0.288765
EIF3M	ENSG00000149100	84.8192	-0.601701	0.295385	-2.03701	0.0416492	0.288765
RPS18	ENSG00000231500	5143.29	0.403349	0.198533	2.03165	0.0421891	0.29012
BAG1	ENSG00000107262	37.2064	0.739041	0.363401	2.03368	0.0419841	0.29012
ZDHHC24	ENSG00000174165	12.3556	-1.04551	0.514497	-2.0321	0.0421439	0.29012
DYRK4	ENSG00000010219	21.4053	-0.847516	0.416962	-2.03259	0.0420935	0.29012
FAM195A	ENSG00000172366	62.439	0.682772	0.3358	2.03327	0.0420251	0.29012
RNF40	ENSG00000103549	16.5745	0.92505	0.455123	2.03253	0.0421004	0.29012
PIEZO1	ENSG00000103335	33.9149	0.753885	0.371614	2.02868	0.0424913	0.291811
PPIF	ENSG00000108179	78.403	0.536215	0.264427	2.02783	0.0425773	0.291996
UQCC1	ENSG00000101019	20.4756	0.809408	0.399286	2.02714	0.042648	0.291996
CSNK1G2	ENSG00000133275	24.2596	0.743255	0.366721	2.02676	0.0426871	0.291996
REST	ENSG00000084093	17.7707	-0.850356	0.419943	-2.02493	0.0428745	0.292176
RAD51AP1	ENSG00000111247	26.7813	-0.882682	0.435833	-2.02527	0.0428393	0.292176
USP5	ENSG00000111667	17.5332	0.84009	0.414897	2.02482	0.0428863	0.292176
OSBPL1A	ENSG00000141447	14.629	0.920122	0.454537	2.0243	0.0429389	0.292176
STARD3	ENSG00000131748	13.9494	0.992813	0.490585	2.02373	0.0429974	0.292191
MRPL19	ENSG00000115364	38.7057	-0.798205	0.394737	-2.02212	0.0431639	0.292939
EPHB2	ENSG00000133216	24.6454	-0.931934	0.461554	-2.01912	0.0434744	0.293609
ACSL3	ENSG00000123983	22.5037	0.817497	0.404906	2.01898	0.0434892	0.293609
ACAA1	ENSG00000060971	12.5172	-1.00517	0.497729	-2.0195	0.0434352	0.293609
VBP1	ENSG00000155959	75.8758	-0.585979	0.290151	-2.01957	0.0434285	0.293609
PARK7	ENSG00000116288	499.682	-0.453029	0.224591	-2.01713	0.0436825	0.293859
PFKM	ENSG00000152556	19.0765	0.823341	0.408202	2.01699	0.0436963	0.293859
DDX5	ENSG00000108654	116.935	-0.510088	0.25285	-2.01735	0.0436586	0.293859
MICALL1	ENSG00000100139	13.5996	1.23231	0.612113	2.01321	0.0440923	0.296138
MED21	ENSG00000152944	22.5818	-1.05992	0.526647	-2.01259	0.0441576	0.296193
FAM134A	ENSG00000144567	21.7593	0.90616	0.450587	2.01106	0.0443187	0.296889
SDHB	ENSG00000117118	87.881	-0.564798	0.280935	-2.01043	0.0443862	0.296958
COMTD1	ENSG00000165644	23.9681	-0.773203	0.38482	-2.00926	0.0445096	0.2974
EEF1B2	ENSG00000114942	530.141	0.375133	0.186939	2.00671	0.0447809	0.298202
STC2	ENSG00000113739	522.006	-0.409909	0.204377	-2.00566	0.0448928	0.298202
NUDT15	ENSG00000136159	17.1589	-0.873133	0.434964	-2.00737	0.0447103	0.298202
CHTF8	ENSG00000168802	33.097	0.654758	0.326493	2.00543	0.0449172	0.298202
RBFOX2	ENSG00000100320	57.7594	0.562204	0.280271	2.00593	0.0448639	0.298202
HOMER3	ENSG00000051128	41.0102	0.779043	0.38861	2.00469	0.0449958	0.298341
FARSB	ENSG00000116120	16.8295	0.902836	0.451006	2.00183	0.0453034	0.299844
TAX1BP1	ENSG00000106052	67.9664	-0.629074	0.314385	-2.00097	0.0453959	0.299844
FNTA	ENSG00000168522	28.4284	-0.75907	0.379346	-2.00099	0.0453929	0.299844
HES4	ENSG00000188290	85.9672	-0.623675	0.312008	-1.99891	0.0456185	0.300734
DCAF13	ENSG00000164934	34.5204	-0.734849	0.367673	-1.99865	0.0456466	0.300734
BCAS2	ENSG00000116752	50.4039	-0.769426	0.385213	-1.9974	0.0457813	0.301106
MAP4K4	ENSG00000071054	37.2895	0.762021	0.381572	1.99705	0.0458193	0.301106
CDC23	ENSG00000094880	12.4679	-1.07192	0.536985	-1.99618	0.045914	0.301347
PHC2	ENSG00000134686	25.4141	0.792361	0.398319	1.98926	0.0466724	0.305551
SNRNP48	ENSG00000168566	14.7461	-0.917187	0.460984	-1.98963	0.0466316	0.305551
PPIA	ENSG00000196262	563.71	-0.580693	0.292203	-1.9873	0.0468895	0.305814
TMX2	ENSG00000213593	35.8502	-0.655204	0.329628	-1.98771	0.046844	0.305814
PSME2	ENSG00000100911	146.133	-0.562433	0.283004	-1.98737	0.0468814	0.305814
PFDN2	ENSG00000143256	186.175	-0.554977	0.279522	-1.98545	0.0470942	0.305994
SNX2	ENSG00000205302	21.7847	-0.837658	0.421895	-1.98547	0.0470925	0.305994
EIF3J	ENSG00000104131	52.6355	-0.788673	0.397152	-1.98582	0.0470532	0.305994
CYHR1	ENSG00000187954	21.399	0.751894	0.379083	1.98346	0.0473165	0.306528
NUP214	ENSG00000126883	12.9673	0.998885	0.503693	1.98312	0.0473537	0.306528
ZNF22	ENSG00000165512	36.5155	-0.677683	0.341702	-1.98326	0.0473383	0.306528
MME	ENSG00000196549	12.0282	1.09462	0.552384	1.98163	0.0475209	0.306957
BTF3	ENSG00000145741	491.117	-0.438461	0.22128	-1.98147	0.0475384	0.306957
C1D	ENSG00000197223	20.0097	-0.856262	0.432581	-1.97942	0.0477683	0.308058
PI4K2A	ENSG00000155252	24.3375	0.787393	0.398573	1.97553	0.0482083	0.309224
FOXM1	ENSG00000111206	86.7712	0.515279	0.260797	1.97579	0.0481789	0.309224
TAX1BP3	ENSG00000213977	92.1975	-0.530031	0.268159	-1.97655	0.0480921	0.309224
SUMO2	ENSG00000188612	315.835	-0.465299	0.235572	-1.97518	0.0482472	0.309224
TYMP	ENSG00000025708	15.4239	1.01327	0.512484	1.97717	0.0480229	0.309224
MCTS1	ENSG00000232119	40.3465	-0.725006	0.367612	-1.9722	0.0485864	0.311013
FAM126A	ENSG00000122591	25.1701	-0.960679	0.487389	-1.97107	0.0487156	0.311455
ASCC3	ENSG00000112249	18.5882	-0.898488	0.456172	-1.96963	0.0488813	0.311584
RAB6A	ENSG00000175582	20.2735	-0.799204	0.405935	-1.9688	0.0489761	0.311584
STK24	ENSG00000102572	16.9122	0.829942	0.42148	1.96911	0.0489401	0.311584
LPCAT2	ENSG00000087253	12.5913	-1.02957	0.522918	-1.9689	0.0489648	0.311584
CCND3	ENSG00000112576	27.4733	0.781185	0.396982	1.96781	0.0490901	0.311926
UBE2N	ENSG00000177889	63.8393	-0.653214	0.332264	-1.96595	0.0493047	0.312907
JAGN1	ENSG00000171135	33.6587	-0.788804	0.401882	-1.96278	0.049672	0.314853
EXOSC7	ENSG00000075914	37.8249	-0.757846	0.386473	-1.96093	0.0498874	0.315832
SNRPB	ENSG00000125835	509.587	-0.400724	0.204457	-1.95994	0.050003	0.316178
ALG8	ENSG00000159063	13.9665	-1.00229	0.511673	-1.95886	0.0501294	0.316538
ATXN10	ENSG00000130638	35.8236	-0.733061	0.374315	-1.95841	0.0501821	0.316538
FLNC	ENSG00000128591	28.1677	0.785101	0.401155	1.9571	0.0503357	0.316736
TRABD	ENSG00000170638	22.5943	0.741269	0.378711	1.95735	0.0503067	0.316736
KDELR1	ENSG00000105438	53.4221	-0.585759	0.29942	-1.95631	0.0504287	0.31686
TTLL12	ENSG00000100304	15.8649	0.933373	0.47721	1.95589	0.0504777	0.31686
LPGAT1	ENSG00000123684	15.9838	-0.899345	0.460325	-1.95372	0.0507347	0.316974
CNBP	ENSG00000169714	187.33	-0.435117	0.222718	-1.95367	0.0507403	0.316974
RBM7	ENSG00000076053	20.3825	-0.780801	0.399566	-1.95412	0.0506867	0.316974
GADD45B	ENSG00000099860	42.6598	-0.614048	0.31418	-1.95445	0.0506486	0.316974
STX4	ENSG00000103496	33.3972	0.634211	0.324827	1.95246	0.0508837	0.317487
PON2	ENSG00000105854	29.3056	-0.684808	0.351495	-1.94827	0.0513822	0.320212
ASL	ENSG00000126522	12.997	-0.948275	0.487092	-1.94681	0.0515575	0.320919
OXLD1	ENSG00000204237	48.434	0.600098	0.308352	1.94615	0.0516373	0.321031
XPO7	ENSG00000130227	12.2187	0.984053	0.506362	1.94338	0.0519706	0.322715
SWI5	ENSG00000175854	72.5932	0.482008	0.248256	1.94158	0.0521884	0.323681
CTNNBIP1	ENSG00000178585	21.8158	-0.921507	0.475022	-1.93993	0.0523887	0.324101
KIAA2013	ENSG00000116685	25.4184	0.72009	0.371263	1.93957	0.0524319	0.324101
GLRX3	ENSG00000108010	112.794	-0.552011	0.284619	-1.93947	0.0524437	0.324101
CIAPIN1	ENSG00000005194	35.1238	-0.651594	0.336157	-1.93836	0.0525789	0.324549
ZWINT	ENSG00000122952	162.67	-0.48339	0.249451	-1.93782	0.0526452	0.324572
HSPH1	ENSG00000120694	13.7442	-0.924438	0.477434	-1.93626	0.0528357	0.32536
LYPLA2	ENSG00000011009	40.8697	0.620802	0.321664	1.92997	0.0536109	0.325876
MGAT4B	ENSG00000161013	44.3055	0.628386	0.325266	1.93192	0.0533699	0.325876
EEF1E1	ENSG00000124802	78.4245	-0.641445	0.331884	-1.93274	0.0532683	0.325876
CREB3L2	ENSG00000182158	24.3849	0.716225	0.370194	1.93473	0.0530234	0.325876
EIF1AX	ENSG00000173674	119.831	-0.513131	0.265328	-1.93395	0.0531198	0.325876
MORC4	ENSG00000133131	30.5054	0.798201	0.412781	1.93371	0.0531485	0.325876
TACC2	ENSG00000138162	18.0537	0.830197	0.430049	1.93047	0.0535482	0.325876
YAP1	ENSG00000137693	12.2289	-0.959156	0.496669	-1.93118	0.0534612	0.325876
SPRYD4	ENSG00000176422	14.344	0.903379	0.467475	1.93246	0.0533024	0.325876
ACIN1	ENSG00000100813	35.66	0.672725	0.347997	1.93313	0.0532201	0.325876
MRPS6	ENSG00000243927	41.4934	-0.647764	0.335465	-1.93094	0.05349	0.325876
MAP2K2	ENSG00000126934	111.045	0.556093	0.28829	1.92893	0.0537391	0.326273
CENPF	ENSG00000117724	191.385	-0.523609	0.271697	-1.92718	0.0539577	0.326618
ILF3	ENSG00000129351	94.3956	0.513275	0.266365	1.92696	0.0539848	0.326618
PHF5A	ENSG00000100410	75.3168	0.46863	0.243135	1.92745	0.0539238	0.326618
VAT1	ENSG00000108828	36.8467	0.793248	0.411991	1.9254	0.054179	0.32741
SMAD3	ENSG00000166949	41.0695	0.638935	0.332328	1.9226	0.0545298	0.328382
TGFB1I1	ENSG00000140682	30.3252	-0.683178	0.355303	-1.9228	0.0545051	0.328382
PCNA	ENSG00000132646	65.6862	-0.644096	0.334839	-1.9236	0.0544048	0.328382
MOB1A	ENSG00000114978	37.1189	-0.676016	0.352212	-1.91934	0.0549408	0.329708
SAAL1	ENSG00000166788	15.1252	-0.957494	0.498758	-1.91976	0.0548888	0.329708
SOCS1	ENSG00000185338	17.6308	0.907202	0.472447	1.92022	0.0548304	0.329708
SMC4	ENSG00000113810	199.487	-0.481098	0.25074	-1.91872	0.0550204	0.329804
AMOTL1	ENSG00000166025	16.8636	0.828167	0.431878	1.9176	0.0551621	0.330272
MRPS21	ENSG00000187145	93.2514	-0.465632	0.24316	-1.91492	0.0555032	0.331931
MLXIP	ENSG00000175727	21.7358	0.760928	0.397716	1.91325	0.0557167	0.332587
VAPA	ENSG00000101558	142.558	-0.480688	0.251268	-1.91305	0.0557412	0.332587
MFN2	ENSG00000116688	17.9561	0.869484	0.456408	1.90506	0.0567724	0.333369
RNF115	ENSG00000121848	25.9326	-0.74343	0.389505	-1.90866	0.0563064	0.333369
MORN2	ENSG00000188010	22.663	-0.856473	0.448608	-1.90918	0.0562391	0.333369
NDUFB3	ENSG00000119013	105.918	0.463289	0.243089	1.90584	0.0566706	0.333369
GNB4	ENSG00000114450	13.248	-0.92109	0.482678	-1.90829	0.0563538	0.333369
MAD2L1	ENSG00000164109	76.1178	-0.698816	0.366622	-1.9061	0.0566378	0.333369
JADE1	ENSG00000077684	13.5958	0.945809	0.495461	1.90895	0.0562689	0.333369
ITGA2	ENSG00000164171	16.5823	0.912709	0.479011	1.9054	0.0567277	0.333369
NOL7	ENSG00000225921	143.263	-0.464864	0.243243	-1.9111	0.0559912	0.333369
MRPL17	ENSG00000158042	106.566	-0.526594	0.276228	-1.90637	0.0566018	0.333369
ARL2	ENSG00000213465	120.587	-0.458904	0.240879	-1.90512	0.0567643	0.333369
MTHFS	ENSG00000136371	18.3818	-0.794321	0.416523	-1.90703	0.0565168	0.333369
CANT1	ENSG00000171302	25.6012	0.828543	0.434829	1.90545	0.056722	0.333369
KHSRP	ENSG00000088247	44.8123	0.645185	0.33861	1.90539	0.056729	0.333369
DDR2	ENSG00000162733	19.0535	0.807038	0.423859	1.90403	0.0569068	0.33378
ATG9A	ENSG00000198925	11.7757	1.01464	0.533252	1.90273	0.0570754	0.334391
ACTB	ENSG00000075624	1620.79	-0.487691	0.25667	-1.90007	0.057424	0.335664
ADK	ENSG00000156110	57.5071	-0.562035	0.295871	-1.89959	0.0574869	0.335664
TNFRSF12A	ENSG00000006327	615.271	-0.407412	0.214369	-1.90052	0.0573652	0.335664
THBS1	ENSG00000137801	38.1145	-0.794744	0.41882	-1.89758	0.0577516	0.33683
PLXNA1	ENSG00000114554	16.9354	0.982109	0.517972	1.89607	0.0579512	0.337615
STK16	ENSG00000115661	19.804	0.877218	0.46279	1.8955	0.0580263	0.337673
FAM199X	ENSG00000123575	15.4747	0.915807	0.483929	1.89244	0.0584324	0.339342
FAM111A	ENSG00000166801	11.5931	-1.06445	0.5625	-1.89235	0.058444	0.339342
FTSJ2	ENSG00000122687	20.8715	-0.798323	0.422544	-1.88933	0.0588483	0.339493
GPR107	ENSG00000148358	11.8483	0.977194	0.516914	1.89044	0.0586993	0.339493
PSMC3	ENSG00000165916	91.4011	-0.580756	0.307406	-1.88922	0.0588629	0.339493
C17orf75	ENSG00000108666	12.9079	-0.934774	0.494556	-1.89013	0.0587407	0.339493
AP3D1	ENSG00000065000	51.9143	0.525966	0.278366	1.88948	0.058828	0.339493
AP1B1	ENSG00000100280	26.6174	0.708046	0.374303	1.89164	0.058539	0.339493
CES2	ENSG00000172831	16.0762	1.00325	0.532016	1.88575	0.0593288	0.3418
TP53RK	ENSG00000172315	24.3432	-0.717849	0.381093	-1.88366	0.0596112	0.343045
DGUOK	ENSG00000114956	100.74	-0.43886	0.233064	-1.883	0.0597001	0.343176
SMARCB1	ENSG00000099956	51.5775	0.548268	0.291253	1.88245	0.0597755	0.343229
PTMS	ENSG00000159335	292.142	-0.365637	0.194541	-1.87948	0.0601785	0.345161
OAT	ENSG00000065154	28.4811	-0.673329	0.358433	-1.87853	0.0603081	0.345522
CD151	ENSG00000177697	151.091	-0.512475	0.273105	-1.87648	0.0605894	0.346225
CHORDC1	ENSG00000110172	27.1722	-0.711265	0.379104	-1.87618	0.0606312	0.346225
LGALS3BP	ENSG00000108679	20.9815	0.780403	0.415765	1.87703	0.060514	0.346225
ITGB1	ENSG00000150093	177.325	0.396531	0.211437	1.87541	0.0607362	0.346444
NDUFA6	ENSG00000184983	124.292	0.422916	0.225795	1.87301	0.0610674	0.34795
RPS28	ENSG00000233927	1349.59	0.498167	0.266263	1.87096	0.0613503	0.349178
MORF4L2	ENSG00000123562	297.1	-0.410008	0.219285	-1.86975	0.0615179	0.349748
YTHDF2	ENSG00000198492	23.1171	-0.716356	0.383938	-1.86581	0.0620678	0.349869
HADHB	ENSG00000138029	23.8614	-0.792584	0.425309	-1.86355	0.0623853	0.349869
FAM208A	ENSG00000163946	12.064	-1.03243	0.553718	-1.86454	0.062246	0.349869
IRAK1	ENSG00000184216	75.5269	0.47373	0.254239	1.86333	0.0624164	0.349869
FAM49B	ENSG00000153310	38.4438	-0.615574	0.32985	-1.86623	0.0620097	0.349869
TOR1A	ENSG00000136827	31.6819	-0.620468	0.332566	-1.8657	0.0620837	0.349869
KDM2A	ENSG00000173120	15.6821	0.950607	0.509579	1.86547	0.0621149	0.349869
CLN6	ENSG00000128973	19.2853	0.907721	0.486206	1.86695	0.0619089	0.349869
FXR2	ENSG00000129245	17.5636	0.875884	0.469134	1.86702	0.0618988	0.349869
FLOT2	ENSG00000132589	17.7392	0.839824	0.450644	1.86361	0.0623764	0.349869
AFG3L2	ENSG00000141385	31.3146	0.619913	0.332019	1.8671	0.0618874	0.349869
MAPK1	ENSG00000100030	23.4194	0.71869	0.385358	1.86499	0.0621827	0.349869
MIS18A	ENSG00000159055	20.145	-0.761293	0.407543	-1.86801	0.0617611	0.349869
CPSF4	ENSG00000160917	24.1	0.833687	0.447869	1.86145	0.0626804	0.35097
NDUFA3	ENSG00000170906	43.4952	-0.698237	0.37521	-1.86092	0.0627553	0.35101
PFDN1	ENSG00000113068	89.8993	-0.49782	0.267984	-1.85765	0.0632189	0.352472
KLHL7	ENSG00000122550	16.8132	-0.944555	0.508352	-1.85807	0.0631589	0.352472
ARPC1A	ENSG00000241685	218.972	0.405116	0.218081	1.85764	0.0632207	0.352472
C12orf45	ENSG00000151131	17.5277	-0.97574	0.525903	-1.85536	0.0635448	0.353519
SMG1	ENSG00000157106	16.0206	0.942632	0.507985	1.85563	0.0635066	0.353519
HMGCL	ENSG00000117305	16.7687	0.87271	0.471262	1.85186	0.0640462	0.355927
AKR1B1	ENSG00000085662	145.34	0.617285	0.333427	1.85134	0.0641213	0.355963
CTDSP1	ENSG00000144579	12.561	1.01969	0.551626	1.84852	0.0645277	0.356404
ALCAM	ENSG00000170017	62.9672	-0.529846	0.286577	-1.84887	0.0644759	0.356404
DDX46	ENSG00000145833	100.759	-0.536623	0.290318	-1.8484	0.0645445	0.356404
PPP1R11	ENSG00000204619	39.5463	-0.566052	0.306114	-1.84915	0.0644355	0.356404
PNP	ENSG00000198805	14.5548	1.015	0.549013	1.84877	0.0644908	0.356404
LAMB3	ENSG00000196878	12.3895	1.20941	0.654471	1.84792	0.0646136	0.356406
HYI	ENSG00000178922	67.7535	-0.584822	0.316675	-1.84676	0.0647825	0.356527
CCT3	ENSG00000163468	131.319	-0.43385	0.234987	-1.84628	0.0648519	0.356527
IVNS1ABP	ENSG00000116679	11.8875	-1.07712	0.58314	-1.8471	0.0647323	0.356527
KLHDC3	ENSG00000124702	53.7756	0.556135	0.301286	1.84587	0.0649107	0.356527
FRMD6	ENSG00000139926	26.5894	-0.699032	0.379902	-1.84003	0.0657637	0.36083
UBE2M	ENSG00000130725	78.8246	-0.502393	0.273167	-1.83914	0.065894	0.361163
PSMD4	ENSG00000159352	109.659	-0.507226	0.275866	-1.83867	0.0659638	0.361164
LAMTOR2	ENSG00000116586	68.3962	-0.551345	0.300691	-1.83359	0.0667147	0.363357
DOCK10	ENSG00000135905	12.2785	1.00698	0.548866	1.83466	0.0665562	0.363357
DDX56	ENSG00000136271	25.3826	-0.665857	0.363115	-1.83374	0.0666928	0.363357
CTC-503J8.6	ENSG00000267427	23.0844	0.69196	0.377373	1.83362	0.06671	0.363357
BCL2L13	ENSG00000099968	33.0288	0.692233	0.377522	1.83362	0.0667098	0.363357
METRN	ENSG00000103260	115.974	0.464667	0.253486	1.83311	0.0667866	0.363367
STX16	ENSG00000124222	27.6165	0.675977	0.369115	1.83134	0.0670491	0.364413
LRPAP1	ENSG00000163956	46.8195	-0.557272	0.304399	-1.83073	0.067141	0.36453
UQCRQ	ENSG00000164405	330.465	-0.398849	0.218034	-1.8293	0.0673553	0.365311
ATP1A1	ENSG00000163399	45.8673	0.582756	0.318749	1.82826	0.0675107	0.36553
GNL1	ENSG00000204590	21.9982	0.761483	0.416547	1.82809	0.0675366	0.36553
PFN1	ENSG00000108518	1835.45	-0.399628	0.218696	-1.82732	0.0676518	0.365771
HAX1	ENSG00000143575	81.6951	-0.482398	0.264078	-1.82672	0.0677415	0.365875
FAM3C	ENSG00000196937	73.7239	0.472201	0.25877	1.82479	0.0680323	0.366184
MTCH2	ENSG00000109919	72.171	-0.472636	0.25886	-1.82584	0.0678747	0.366184
HDAC7	ENSG00000061273	16.304	0.876236	0.480076	1.8252	0.0679702	0.366184
L3MBTL2	ENSG00000100395	13.5136	0.951594	0.521573	1.82447	0.0680813	0.366184
JADE2	ENSG00000043143	12.7808	0.986386	0.540856	1.82375	0.06819	0.366389
TMEM167A	ENSG00000174695	73.8348	-0.515791	0.282931	-1.82302	0.0682997	0.366598
HIST1H1B	ENSG00000184357	29.0794	0.788664	0.432962	1.82155	0.0685226	0.367035
UBAC2	ENSG00000134882	17.1511	0.816509	0.448232	1.82162	0.0685127	0.367035
TFE3	ENSG00000068323	16.2877	0.877911	0.48221	1.8206	0.0686678	0.367433
ZFYVE21	ENSG00000100711	14.8338	-0.826357	0.454127	-1.81966	0.0688107	0.367818
CSNK1D	ENSG00000141551	37.2571	0.574329	0.315718	1.81912	0.0688936	0.367882
VAC14	ENSG00000103043	14.5117	0.974347	0.535917	1.81809	0.0690499	0.368337
SSB	ENSG00000138385	148.192	-0.627561	0.345431	-1.81675	0.0692561	0.368479
MRPS25	ENSG00000131368	48.9276	-0.52516	0.289175	-1.81606	0.0693608	0.368479
NHP2	ENSG00000145912	303.452	-0.412455	0.227091	-1.81626	0.0693308	0.368479
ARHGAP18	ENSG00000146376	88.8718	-0.647438	0.356488	-1.81616	0.0693461	0.368479
PPA2	ENSG00000138777	20.648	-0.850234	0.46845	-1.81499	0.069525	0.368841
BRD4	ENSG00000141867	53.2841	0.496225	0.273518	1.81423	0.0696423	0.368841
ZNF667-AS1	ENSG00000166770	12.5158	-1.10625	0.609643	-1.81459	0.0695866	0.368841
SUCLA2	ENSG00000136143	13.0726	-1.01524	0.560256	-1.81209	0.069972	0.370209
KRTCAP2	ENSG00000163463	22.2925	-0.700772	0.386843	-1.81152	0.0700611	0.370303
RSRC1	ENSG00000174891	37.1088	-0.579698	0.320203	-1.81041	0.0702324	0.37083
GLT8D1	ENSG00000016864	16.2703	-0.779004	0.430888	-1.8079	0.0706215	0.371
BRIX1	ENSG00000113460	60.3274	-0.582253	0.321971	-1.8084	0.0705437	0.371
ASB6	ENSG00000148331	13.4737	0.925085	0.511478	1.80865	0.0705053	0.371
PCBP2	ENSG00000197111	162.762	0.427029	0.236202	1.8079	0.0706224	0.371
THOP1	ENSG00000172009	39.4332	0.562492	0.310859	1.80948	0.0703766	0.371
MALAT1	ENSG00000251562	2903.17	-0.41748	0.231256	-1.80528	0.0710316	0.372423
TBCB	ENSG00000105254	116.927	-0.586167	0.324786	-1.80478	0.0711088	0.372423
FBLN1	ENSG00000077942	49.5472	0.573253	0.317615	1.80487	0.0710951	0.372423
C9orf142	ENSG00000148362	79.8459	0.534829	0.296692	1.80264	0.0714451	0.372532
TRUB1	ENSG00000165832	11.9245	-0.917632	0.509128	-1.80236	0.0714887	0.372532
CELF1	ENSG00000149187	35.4418	0.609555	0.338129	1.80273	0.0714305	0.372532
MYL6B	ENSG00000196465	119.098	0.482148	0.2675	1.80243	0.0714784	0.372532
DYNLRB1	ENSG00000125971	159.662	-0.439516	0.24372	-1.80337	0.0713307	0.372532
LENG1	ENSG00000105617	18.2786	-0.74107	0.411446	-1.80113	0.0716818	0.373163
NUDT14	ENSG00000183828	13.5925	-0.872611	0.484692	-1.80034	0.071807	0.373288
YWHAE	ENSG00000108953	180.439	-0.376001	0.208912	-1.79981	0.0718914	0.373288
FBL	ENSG00000105202	81.3841	-0.453548	0.252025	-1.79961	0.0719217	0.373288
ID3	ENSG00000117318	422.322	-0.543844	0.302503	-1.79782	0.072206	0.373641
PRDX1	ENSG00000117450	313.058	-0.632296	0.351698	-1.79784	0.0722024	0.373641
AATF	ENSG00000108270	28.8485	-0.650799	0.361983	-1.79787	0.072197	0.373641
RHOA	ENSG00000067560	146.464	-0.525771	0.292951	-1.79474	0.0726946	0.37394
VCAN	ENSG00000038427	18.9109	0.800252	0.445672	1.79561	0.0725568	0.37394
RPS20	ENSG00000008988	860.65	0.328429	0.182902	1.79566	0.0725493	0.37394
PSIP1	ENSG00000164985	92.0571	0.591899	0.329906	1.79415	0.0727898	0.37394
TUSC1	ENSG00000198680	36.0701	0.716778	0.39958	1.79383	0.0728408	0.37394
TBC1D2	ENSG00000095383	18.7272	0.769853	0.429028	1.79441	0.0727472	0.37394
DNAJC1	ENSG00000136770	48.6734	0.540216	0.300869	1.79552	0.0725711	0.37394
LYRM5	ENSG00000205707	22.0516	0.766218	0.42678	1.79535	0.0725987	0.37394
TRAPPC4	ENSG00000196655	95.5271	-0.652419	0.36392	-1.79275	0.0730127	0.374336
EMG1	ENSG00000126749	102.007	-0.422035	0.235453	-1.79244	0.0730623	0.374336
ICT1	ENSG00000167862	43.8761	-0.584278	0.326226	-1.79102	0.0732893	0.375129
SMARCE1	ENSG00000073584	23.2604	-0.685648	0.383285	-1.78888	0.0736349	0.376526
MPG	ENSG00000103152	69.1177	0.479867	0.268506	1.78717	0.0739094	0.377557
DEPDC1	ENSG00000024526	50.4862	-0.61692	0.345888	-1.78358	0.0744916	0.377985
PIGC	ENSG00000135845	13.1745	-0.914263	0.512397	-1.78429	0.074377	0.377985
PRR16	ENSG00000184838	27.9304	-0.674055	0.378222	-1.78217	0.0747221	0.377985
COQ3	ENSG00000132423	13.2478	-0.873324	0.489318	-1.78478	0.074297	0.377985
REXO2	ENSG00000076043	177.064	-0.579056	0.324766	-1.78299	0.0745873	0.377985
CCNDBP1	ENSG00000166946	16.0041	-0.797828	0.447618	-1.78238	0.0746865	0.377985
C1QL1	ENSG00000131094	32.6181	-0.641565	0.359316	-1.78552	0.0741776	0.377985
SLC39A6	ENSG00000141424	13.4877	-0.864536	0.484791	-1.78332	0.0745345	0.377985
CHERP	ENSG00000085872	15.2164	0.891283	0.499225	1.78533	0.0742073	0.377985
PES1	ENSG00000100029	35.9879	0.578364	0.324497	1.78234	0.0746939	0.377985
YWHAB	ENSG00000166913	224.657	-0.378001	0.212266	-1.78078	0.0749476	0.378756
FAM168B	ENSG00000152102	27.4948	0.663261	0.372879	1.77876	0.0752796	0.379037
MSMO1	ENSG00000052802	13.9006	-0.850888	0.478387	-1.77866	0.0752957	0.379037
PPHLN1	ENSG00000134283	26.0794	-0.68236	0.383386	-1.77983	0.0751044	0.379037
ZNF207	ENSG00000010244	42.8141	-0.53709	0.301839	-1.77939	0.075176	0.379037
MT-ND1	ENSG00000198888	757.551	0.493147	0.277749	1.77552	0.0758129	0.38127
DDX54	ENSG00000123064	40.3127	0.577166	0.325301	1.77425	0.0760221	0.381952
EIF1AD	ENSG00000175376	12.3805	-0.885324	0.499491	-1.77245	0.0763197	0.383076
ITGA5	ENSG00000161638	59.4262	0.591373	0.333863	1.7713	0.0765104	0.383662
SPCS3	ENSG00000129128	32.7662	-0.621591	0.351164	-1.77009	0.0767123	0.384303
COPS8	ENSG00000198612	50.4226	-0.599782	0.339663	-1.76581	0.077427	0.385771
TMEM123	ENSG00000152558	53.3911	-0.527582	0.298654	-1.76653	0.0773063	0.385771
NRGN	ENSG00000154146	24.8851	-0.670312	0.379516	-1.76623	0.0773578	0.385771
COPS3	ENSG00000141030	42.9523	-0.531388	0.300784	-1.76667	0.077283	0.385771
DDX52	ENSG00000141141	24.7498	-0.724141	0.410123	-1.76567	0.0774517	0.385771
DOT1L	ENSG00000104885	14.12	1.02612	0.580458	1.76778	0.0770978	0.385771
LGALS3	ENSG00000131981	13.5482	-0.937278	0.531025	-1.76504	0.0775578	0.385928
NAGK	ENSG00000124357	23.9597	-0.733526	0.415887	-1.76376	0.0777716	0.386621
DUS1L	ENSG00000169718	21.8878	0.774961	0.439683	1.76255	0.0779769	0.38727
APOA1BP	ENSG00000163382	50.5792	-0.495327	0.281247	-1.76118	0.0782074	0.38734
C1orf198	ENSG00000119280	11.71	-0.91765	0.521186	-1.7607	0.0782898	0.38734
SUCLG2	ENSG00000172340	18.943	-0.735495	0.417577	-1.76134	0.0781809	0.38734
TBC1D7	ENSG00000145979	15.4706	-0.800493	0.454631	-1.76075	0.0782802	0.38734
KIF20B	ENSG00000138182	61.3805	-0.610546	0.347082	-1.75908	0.0785634	0.388323
PRPF31	ENSG00000105618	40.5436	-0.566767	0.32237	-1.75813	0.0787262	0.388758
CABLES1	ENSG00000134508	13.804	0.843325	0.479861	1.75744	0.0788437	0.388967
FBXL3	ENSG00000005812	13.9673	0.81346	0.463868	1.75364	0.0794915	0.39179
RABIF	ENSG00000183155	22.1251	-0.754687	0.430638	-1.75249	0.0796902	0.392397
DPP9	ENSG00000142002	23.971	0.688025	0.392786	1.75166	0.079833	0.392727
RNF11	ENSG00000123091	22.2868	-0.724124	0.413631	-1.75065	0.0800061	0.393205
FAM120A	ENSG00000048828	22.7469	0.680533	0.388868	1.75003	0.0801123	0.393354
UCHL5	ENSG00000116750	20.8389	-0.751099	0.429672	-1.74808	0.0804508	0.394157
TSNAX	ENSG00000116918	13.4491	-0.822385	0.470534	-1.74777	0.0805039	0.394157
TECR	ENSG00000099797	78.1851	-0.458356	0.262175	-1.74828	0.0804158	0.394157
IMMT	ENSG00000132305	28.7623	-0.590026	0.337854	-1.74639	0.0807429	0.394669
NMT2	ENSG00000152465	57.1131	0.557036	0.318982	1.74629	0.0807606	0.394669
QDPR	ENSG00000151552	27.633	-0.613255	0.351284	-1.74575	0.0808538	0.394723
HIST1H2AC	ENSG00000180573	28.8528	0.814455	0.466643	1.74535	0.0809239	0.394723
TM2D2	ENSG00000169490	44.4953	-0.670341	0.384215	-1.7447	0.0810363	0.3949
EPRS	ENSG00000136628	40.167	-0.57357	0.328937	-1.74371	0.0812101	0.395375
LINC00969	ENSG00000242086	14.3408	0.861873	0.495268	1.74021	0.0818213	0.397464
CENPU	ENSG00000151725	22.5834	-0.708222	0.407089	-1.73973	0.0819073	0.397464
TSC22D4	ENSG00000166925	31.9264	0.597585	0.343377	1.74032	0.0818031	0.397464
MYO9B	ENSG00000099331	19.4775	0.759672	0.436717	1.73951	0.0819458	0.397464
FBXO22	ENSG00000167196	16.1866	-0.750604	0.431617	-1.73905	0.0820263	0.397483
PPT1	ENSG00000131238	29.7033	-0.633922	0.36476	-1.73792	0.0822255	0.397704
RPL39	ENSG00000198918	295.174	0.520662	0.299547	1.73816	0.0821818	0.397704
SGOL1	ENSG00000129810	40.9501	-0.635522	0.366031	-1.73625	0.0825195	0.398724
EEF1D	ENSG00000104529	586.559	0.347552	0.200621	1.73238	0.0832052	0.398724
PITRM1	ENSG00000107959	26.091	0.671102	0.386915	1.73449	0.0828304	0.398724
B3GAT3	ENSG00000149541	42.1303	0.583596	0.336393	1.73486	0.0827648	0.398724
AAMDC	ENSG00000087884	37.5991	-0.571748	0.329965	-1.73275	0.0831396	0.398724
DTWD1	ENSG00000104047	16.4177	-0.795805	0.458509	-1.73564	0.0826283	0.398724
MESDC2	ENSG00000117899	49.47	-0.534814	0.308209	-1.73523	0.0827	0.398724
NPRL3	ENSG00000103148	24.3397	0.73909	0.426537	1.73277	0.0831368	0.398724
EIF5A	ENSG00000132507	449.655	-0.355825	0.205311	-1.7331	0.0830774	0.398724
CD97	ENSG00000123146	29.5517	0.657242	0.379161	1.73341	0.0830229	0.398724
PGD	ENSG00000142657	46.8483	0.535666	0.309567	1.73037	0.0835639	0.398964
AR	ENSG00000169083	12.9668	0.916673	0.529841	1.73009	0.0836139	0.398964
UBAP1	ENSG00000165006	14.4694	0.792482	0.45806	1.73008	0.0836153	0.398964
HSP90B1	ENSG00000166598	153.908	-0.51347	0.296759	-1.73026	0.0835846	0.398964
ERH	ENSG00000100632	216.549	-0.425565	0.245999	-1.72995	0.08364	0.398964
HNRNPU	ENSG00000153187	109.848	-0.446425	0.258201	-1.72898	0.0838126	0.399019
COQ4	ENSG00000167113	67.4508	0.500882	0.289835	1.72816	0.0839594	0.399019
GSTP1	ENSG00000084207	373.152	-0.464281	0.268573	-1.7287	0.0838632	0.399019
LOXL1	ENSG00000129038	41.1154	-0.687033	0.397465	-1.72854	0.0838922	0.399019
MAGOH	ENSG00000162385	44.2768	-0.57475	0.333162	-1.72514	0.0845029	0.399222
GPC1	ENSG00000063660	11.9483	0.868521	0.503062	1.72647	0.0842629	0.399222
TAF9	ENSG00000085231	150.443	-0.394878	0.228662	-1.72691	0.0841841	0.399222
RPS4X	ENSG00000198034	1893.27	0.351188	0.203701	1.72404	0.0847015	0.399222
ODF2	ENSG00000136811	13.547	0.817128	0.473566	1.72548	0.0844415	0.399222
VPS26A	ENSG00000122958	39.5904	-0.605561	0.350617	-1.72713	0.0841443	0.399222
FADS3	ENSG00000221968	20.5718	-0.752334	0.436479	-1.72364	0.0847721	0.399222
TSPAN3	ENSG00000140391	19.841	-0.706036	0.409606	-1.72369	0.084763	0.399222
IGF2BP1	ENSG00000159217	15.6609	0.750132	0.434896	1.72485	0.0845541	0.399222
EXOC7	ENSG00000182473	24.9941	0.63506	0.368188	1.72483	0.0845584	0.399222
ENG	ENSG00000106991	13.086	0.986057	0.573085	1.72061	0.0853213	0.399738
GHITM	ENSG00000165678	168.433	-0.465313	0.27045	-1.72052	0.0853389	0.399738
EIF4B	ENSG00000063046	63.1627	0.59836	0.347516	1.72182	0.0851024	0.399738
DUT	ENSG00000128951	149.066	-0.508609	0.295619	-1.72049	0.0853443	0.399738
GABARAPL2	ENSG00000034713	153.987	-0.420448	0.24412	-1.7223	0.0850151	0.399738
POP4	ENSG00000105171	38.2406	-0.613658	0.356522	-1.72123	0.0852084	0.399738
NAA10	ENSG00000102030	150.084	-0.388879	0.22611	-1.71986	0.0854572	0.399906
ATG5	ENSG00000057663	31.0119	-0.658531	0.383016	-1.71933	0.0855545	0.4
SSR1	ENSG00000124783	32.2452	-0.632713	0.368113	-1.7188	0.0856504	0.400088
DDAH1	ENSG00000153904	32.0596	-0.620289	0.36111	-1.71773	0.0858463	0.400642
DUSP12	ENSG00000081721	23.7751	-0.761598	0.444032	-1.71519	0.0863111	0.401366
MRPS10	ENSG00000048544	46.5301	0.503659	0.29358	1.71558	0.0862397	0.401366
CETN2	ENSG00000147400	31.671	-0.634859	0.369906	-1.71627	0.0861126	0.401366
MFSD12	ENSG00000161091	30.6435	0.662787	0.386367	1.71543	0.086266	0.401366
RBM8A	ENSG00000131795	235.371	-0.529175	0.308847	-1.71339	0.0866414	0.402529
TERF1	ENSG00000147601	23.7341	-0.732112	0.427602	-1.71213	0.0868718	0.402529
PARVA	ENSG00000197702	21.4968	-0.650447	0.379896	-1.71217	0.086865	0.402529
SERPINH1	ENSG00000149257	59.0383	-0.462635	0.270097	-1.71285	0.0867407	0.402529
CD46	ENSG00000117335	12.2204	-0.847313	0.495333	-1.71059	0.0871563	0.402703
FBXO18	ENSG00000134452	17.3089	0.730247	0.42688	1.71066	0.0871438	0.402703
GIT1	ENSG00000108262	15.0515	0.807569	0.472194	1.71025	0.08722	0.402703
RUVBL2	ENSG00000183207	56.2752	-0.503262	0.294114	-1.71111	0.0870599	0.402703
FAM27A	ENSG00000182368	16.1576	1.01579	0.594633	1.70826	0.0875876	0.402965
CTSC	ENSG00000109861	121.969	-0.688875	0.403021	-1.70928	0.0873996	0.402965
DHX38	ENSG00000140829	25.5171	0.690732	0.404167	1.70903	0.0874462	0.402965
COTL1	ENSG00000103187	310.979	0.329551	0.192888	1.70851	0.087542	0.402965
TXNDC17	ENSG00000129235	150.293	-0.430636	0.25219	-1.70758	0.0877135	0.403187
MAPRE1	ENSG00000101367	64.7426	-0.487556	0.285706	-1.70649	0.0879167	0.403763
TMEM261	ENSG00000137038	99.3118	0.527293	0.309165	1.70554	0.0880939	0.404218
PSMG4	ENSG00000180822	46.5709	0.484633	0.284838	1.70143	0.0888623	0.407059
AMDHD2	ENSG00000162066	15.5579	0.75656	0.444672	1.70139	0.08887	0.407059
PBDC1	ENSG00000102390	46.514	-0.627146	0.368724	-1.70085	0.0889704	0.407159
CERK	ENSG00000100422	23.9475	0.791052	0.465311	1.70005	0.0891218	0.407493
SLC30A9	ENSG00000014824	22.3833	-0.642688	0.378495	-1.69801	0.0895057	0.407566
BAG6	ENSG00000204463	27.397	0.597648	0.352368	1.69609	0.0898687	0.407566
PHF1	ENSG00000112511	12.1575	0.943517	0.555985	1.69702	0.0896933	0.407566
MAD1L1	ENSG00000002822	20.3046	0.821757	0.484446	1.69628	0.0898322	0.407566
KDELR2	ENSG00000136240	190.455	-0.49818	0.29337	-1.69813	0.0894839	0.407566
UBAP2	ENSG00000137073	20.3886	0.714564	0.421373	1.6958	0.0899239	0.407566
NRP1	ENSG00000099250	24.4404	0.615715	0.362674	1.69771	0.089563	0.407566
[truncated: 18,304 more rows]

## Sheet: S6d (G2_M)
Supplemental Table S6: scRNA-seq phase-specific DE results. d DE analysis results (DESeq2 output) comparing NHA-CICKO versus NHA-CICWT cells assigned to the G2/M phase. Base mean: mean of normalized counts for all samples. SE: standard error. Stat: Wald statistic. Adjusted p-values were obtained using the Benjamini-Hochberg method. Genes without adjusted p-values were filtered by automatic indepe…
[truncated: 19,446 more rows]

[truncated: 1 more sheets: S6e (M_G1)]
