# Supplementary material for: Multi-Omic Analysis of CIC’s Functional Networks Reveals Novel Interaction Partners and a Potential Role in Mitotic Fidelity
Source: Cancers (Basel). 2023 May 17;15(10):2805. doi: 10.3390/cancers15102805 (PMC10216487; doi:10.3390/cancers15102805)
Supplement: Supplementary file 1 [file cancers-15-02805-s001.zip › Supplemental_Table_S11_splicing.xlsx]

## Sheet: S10a (All events detected)
Supplemental Table S11: Alternative splicing events detected in NHA cell lines. a Results of all splicing events quantified (Whippet.quant.jl output) in NHA-CICWT line, NHA-CICKO-A2 line, and NHA-CICKO-H9 line.
CellLine	ensembl_id	Node	Coord	Type	mean_entropy
NHA-WT	ENSG00000000419	15	20:49552685-49552799	CE	0
NHA-WT	ENSG00000000457	10	1:169838181-169838269	AA	0
NHA-WT	ENSG00000000457	20	1:169822215-169822913	TE	0.7389
NHA-WT	ENSG00000000457	21	1:169821804-169822214	TE	0.7389
NHA-WT	ENSG00000000457	22	1:169818772-169821803	TE	0.7389
NHA-WT	ENSG00000000460	46	1:169821931-169822226	TE	0.210233
NHA-WT	ENSG00000000460	47	1:169822227-169823221	TE	0.210233
NHA-WT	ENSG00000001036	1	6:143832800-143832827	TS	0
NHA-WT	ENSG00000001036	2	6:143832548-143832799	TS	0
NHA-WT	ENSG00000001167	11	6:41065096-41065689	TE	0
NHA-WT	ENSG00000001167	12	6:41065690-41067715	TE	0
NHA-WT	ENSG00000001460	1	1:24743086-24743424	TS	0.0137
NHA-WT	ENSG00000001460	2	1:24742967-24743085	TS	0.0137
NHA-WT	ENSG00000001630	17	7:91743008-91743157	TE	1.02483
NHA-WT	ENSG00000001630	18	7:91742899-91743007	TE	1.02483
NHA-WT	ENSG00000001630	19	7:91742726-91742898	TE	1.02483
NHA-WT	ENSG00000001630	20	7:91741465-91742725	TE	1.02483
NHA-WT	ENSG00000001631	1	7:91875415-91875480	TS	0.45585
NHA-WT	ENSG00000001631	2	7:91875374-91875414	TS	0.45585
NHA-WT	ENSG00000001631	3	7:91875258-91875373	TS	0.45585
NHA-WT	ENSG00000001631	4	7:91875245-91875257	TS	0.45585
NHA-WT	ENSG00000001631	5	7:91875239-91875244	TS	0.45585
NHA-WT	ENSG00000001631	6	7:91875238-91875238	TS	0.45585
NHA-WT	ENSG00000001631	7	7:91875235-91875237	TS	0.45585
NHA-WT	ENSG00000001631	8	7:91875230-91875234	TS	0.45585
NHA-WT	ENSG00000001631	9	7:91875229-91875229	TS	0.45585
NHA-WT	ENSG00000001631	10	7:91875227-91875228	TS	0.45585
NHA-WT	ENSG00000001631	11	7:91875220-91875226	TS	0.45585
NHA-WT	ENSG00000002016	20	12:1039217-1039310	CE	0
NHA-WT	ENSG00000002016	21	12:1039139-1039216	AD	0
NHA-WT	ENSG00000002016	30	12:1036113-1036310	RI	0
NHA-WT	ENSG00000002016	39	12:1025699-1025701	AA	0
NHA-WT	ENSG00000002016	40	12:1025650-1025698	AA	0
NHA-WT	ENSG00000002016	41	12:1025510-1025649	CE	0
NHA-WT	ENSG00000002016	44	12:1023577-1023596	AD	0
NHA-WT	ENSG00000002016	48	12:1022525-1022618	TE	1.16497
NHA-WT	ENSG00000002016	49	12:1022400-1022524	TE	1.16497
NHA-WT	ENSG00000002016	50	12:1022316-1022399	TE	1.16497
NHA-WT	ENSG00000002016	51	12:1021924-1022315	TE	1.16497
NHA-WT	ENSG00000002016	52	12:1021711-1021923	TE	1.16497
NHA-WT	ENSG00000002016	53	12:1021661-1021710	TE	1.16497
NHA-WT	ENSG00000002016	54	12:1021655-1021660	TE	1.16497
NHA-WT	ENSG00000002016	55	12:1021321-1021654	TE	1.16497
NHA-WT	ENSG00000002016	56	12:1021243-1021320	TE	1.16497
NHA-WT	ENSG00000002330	8	11:64044376-64044515	CE	0
NHA-WT	ENSG00000002330	13	11:64037780-64037809	TE	0
NHA-WT	ENSG00000002330	14	11:64037741-64037779	TE	0
NHA-WT	ENSG00000002330	15	11:64037728-64037740	TE	0
NHA-WT	ENSG00000002330	16	11:64037473-64037727	TE	0
NHA-WT	ENSG00000002330	17	11:64037306-64037472	TE	0
NHA-WT	ENSG00000002330	18	11:64037302-64037305	TE	0
NHA-WT	ENSG00000002549	30	4:17609023-17609557	TE	0
NHA-WT	ENSG00000002549	31	4:17609558-17609591	TE	0
NHA-WT	ENSG00000002549	32	4:17609592-17609595	TE	0
NHA-WT	ENSG00000002745	5	7:120978935-120979512	TE	0.8121
NHA-WT	ENSG00000002745	6	7:120979513-120981158	TE	0.8121
NHA-WT	ENSG00000002746	50	7:43601414-43601651	TE	0.527567
NHA-WT	ENSG00000002746	51	7:43601652-43605600	TE	0.527567
NHA-WT	ENSG00000003056	32	12:9093466-9093499	AA	0
NHA-WT	ENSG00000003056	33	12:9093347-9093465	TE	0.316767
NHA-WT	ENSG00000003056	34	12:9092961-9093346	TE	0.316767
NHA-WT	ENSG00000003056	35	12:9092959-9092960	TE	0.316767
NHA-WT	ENSG00000003249	1	16:90086289-90086536	TS	0.213667
NHA-WT	ENSG00000003249	2	16:90086136-90086288	TS	0.213667
NHA-WT	ENSG00000003249	11	16:90072888-90072900	TE	0.269733
NHA-WT	ENSG00000003249	12	16:90072627-90072887	TE	0.269733
NHA-WT	ENSG00000003249	13	16:90072597-90072626	TE	0.269733
NHA-WT	ENSG00000003249	14	16:90071281-90072596	TE	0.269733
NHA-WT	ENSG00000003249	15	16:90071273-90071280	TE	0.269733
NHA-WT	ENSG00000003402	1	2:201980827-201980876	TS	0.6276
NHA-WT	ENSG00000003402	2	2:201980877-201980889	TS	0.6276
NHA-WT	ENSG00000003402	3	2:201980890-201980929	TS	0.6276
NHA-WT	ENSG00000003402	4	2:201980930-201980961	TS	0.6276
NHA-WT	ENSG00000003402	5	2:201980962-201981129	TS	0.6276
NHA-WT	ENSG00000003402	6	2:201981130-201981204	TS	0.6276
NHA-WT	ENSG00000003402	32	2:202000921-202001004	TE	0
NHA-WT	ENSG00000003402	33	2:202001005-202001137	TE	0
NHA-WT	ENSG00000003402	34	2:202001138-202004600	TE	0
NHA-WT	ENSG00000003402	54	2:202028558-202028696	TE	0
NHA-WT	ENSG00000003402	55	2:202028697-202028833	TE	0
NHA-WT	ENSG00000003402	56	2:202028834-202028885	TE	0
NHA-WT	ENSG00000003402	57	2:202028886-202029001	TE	0
NHA-WT	ENSG00000003402	58	2:202029002-202029002	TE	0
NHA-WT	ENSG00000003402	59	2:202029003-202041410	TE	0
NHA-WT	ENSG00000003436	11	2:188378381-188384587	TS	0
NHA-WT	ENSG00000003436	12	2:188378374-188378380	TS	0
NHA-WT	ENSG00000003509	33	2:37475278-37475400	AA	0
NHA-WT	ENSG00000003509	34	2:37475401-37475530	TE	0.38315
NHA-WT	ENSG00000003509	35	2:37475531-37475563	TE	0.38315
NHA-WT	ENSG00000003987	30	8:17156911-17157733	TE	0.000333333
NHA-WT	ENSG00000003987	31	8:17155539-17156910	TE	0.000333333
NHA-WT	ENSG00000003989	17	8:17422459-17422783	TE	0.2317
NHA-WT	ENSG00000003989	18	8:17422784-17428070	TE	0.2317
NHA-WT	ENSG00000003989	19	8:17428071-17428082	TE	0.2317
NHA-WT	ENSG00000004139	23	17:26723046-26723175	RI	0
NHA-WT	ENSG00000004139	26	17:26723280-26723430	TE	0.644967
NHA-WT	ENSG00000004139	27	17:26723431-26723839	TE	0.644967
NHA-WT	ENSG00000004139	29	17:26725070-26725151	TE	0.163167
NHA-WT	ENSG00000004139	30	17:26725152-26725179	TE	0.163167
NHA-WT	ENSG00000004139	31	17:26725180-26728065	TE	0.163167
NHA-WT	ENSG00000004142	14	17:26674203-26675257	TE	0
NHA-WT	ENSG00000004142	15	17:26673659-26674202	TE	0
NHA-WT	ENSG00000004478	1	12:2904119-2904234	TS	0.22255
NHA-WT	ENSG00000004478	2	12:2904235-2904410	TS	0.22255
NHA-WT	ENSG00000004478	4	12:2905431-2905534	CE	0
NHA-WT	ENSG00000004478	11	12:2907993-2908253	RI	0
NHA-WT	ENSG00000004478	12	12:2908254-2908410	CE	0
NHA-WT	ENSG00000004487	24	1:23405459-23405482	AA	0
NHA-WT	ENSG00000004487	29	1:23407939-23408066	CE	0
NHA-WT	ENSG00000004487	30	1:23408067-23408712	RI	0
NHA-WT	ENSG00000004487	31	1:23408713-23408859	CE	0
NHA-WT	ENSG00000004487	32	1:23408860-23409671	RI	0
NHA-WT	ENSG00000004487	33	1:23409672-23409847	TE	0.143133
NHA-WT	ENSG00000004487	34	1:23409848-23410175	TE	0.143133
NHA-WT	ENSG00000004487	35	1:23410176-23410181	TE	0.143133
NHA-WT	ENSG00000004487	36	1:23410182-23410182	TE	0.143133
NHA-WT	ENSG00000004700	30	12:21622736-21623280	TE	0.8488
NHA-WT	ENSG00000004700	31	12:21621845-21622735	TE	0.8488
NHA-WT	ENSG00000004776	7	19:36246284-36246584	TE	0.688533
NHA-WT	ENSG00000004776	8	19:36245470-36246283	TE	0.688533
NHA-WT	ENSG00000004776	9	19:36245469-36245469	TE	0.688533
NHA-WT	ENSG00000004866	1	7:116593292-116593380	TS	0
NHA-WT	ENSG00000004866	2	7:116593381-116593395	TS	0
NHA-WT	ENSG00000004866	3	7:116593396-116593400	TS	0
NHA-WT	ENSG00000004866	4	7:116593401-116593432	TS	0
NHA-WT	ENSG00000004866	5	7:116593433-116593520	TS	0
NHA-WT	ENSG00000004866	6	7:116593521-116593556	TS	0
NHA-WT	ENSG00000004866	7	7:116593557-116593574	TS	0
NHA-WT	ENSG00000004866	8	7:116593575-116593745	TS	0
NHA-WT	ENSG00000004897	5	17:45266619-45266627	TS	2
NHA-WT	ENSG00000004897	6	17:45266618-45266618	TS	2
NHA-WT	ENSG00000004897	7	17:45266591-45266617	TS	2
NHA-WT	ENSG00000004897	8	17:45266543-45266590	TS	2
NHA-WT	ENSG00000004897	9	17:45266512-45266542	TS	2
NHA-WT	ENSG00000004897	10	17:45266112-45266302	AF	0
NHA-WT	ENSG00000004897	18	17:45235572-45235669	CE	0
NHA-WT	ENSG00000004897	24	17:45234279-45234349	CE	0
NHA-WT	ENSG00000004897	25	17:45234013-45234081	AF	0
NHA-WT	ENSG00000004897	26	17:45232153-45232230	AA	0
NHA-WT	ENSG00000004897	30	17:45229285-45229302	AA	0
NHA-WT	ENSG00000004975	50	17:7129456-7129632	TE	0
NHA-WT	ENSG00000004975	51	17:7128774-7129455	TE	0
NHA-WT	ENSG00000004975	52	17:7128660-7128773	TE	0
NHA-WT	ENSG00000005022	3	X:118602454-118602589	AD	0
NHA-WT	ENSG00000005059	17	4:110608671-110608872	TE	0.686033
NHA-WT	ENSG00000005059	18	4:110608873-110609874	TE	0.686033
NHA-WT	ENSG00000005075	6	7:102113910-102114131	TE	0
NHA-WT	ENSG00000005075	7	7:102113565-102113909	TE	0
NHA-WT	ENSG00000005156	35	17:33324053-33324736	TS	0
NHA-WT	ENSG00000005156	36	17:33324737-33324756	TS	0
NHA-WT	ENSG00000005156	45	17:33325747-33326325	RI	0
NHA-WT	ENSG00000005156	56	17:33330193-33331291	RI	0
NHA-WT	ENSG00000005156	57	17:33331292-33331391	TE	0.422033
NHA-WT	ENSG00000005156	58	17:33331392-33331823	TE	0.422033
NHA-WT	ENSG00000005156	59	17:33331824-33332083	TE	0.422033
NHA-WT	ENSG00000005187	40	16:20807692-20807811	CE	0
NHA-WT	ENSG00000005187	41	16:20808208-20808251	TE	0.284
NHA-WT	ENSG00000005187	42	16:20808252-20808314	TE	0.284
NHA-WT	ENSG00000005187	43	16:20808315-20808475	TE	0.284
NHA-WT	ENSG00000005187	44	16:20808476-20808478	TE	0.284
NHA-WT	ENSG00000005187	45	16:20808479-20808903	TE	0.284
NHA-WT	ENSG00000005189	4	16:20817818-20817820	TS	0.10865
NHA-WT	ENSG00000005189	5	16:20817821-20817842	TS	0.10865
NHA-WT	ENSG00000005189	6	16:20817843-20817848	TS	0.10865
NHA-WT	ENSG00000005189	7	16:20817849-20817873	TS	0.10865
NHA-WT	ENSG00000005189	8	16:20817874-20817938	TS	0.10865
NHA-WT	ENSG00000005189	9	16:20817939-20817945	TS	0.10865
NHA-WT	ENSG00000005189	10	16:20817946-20817978	TS	0.10865
NHA-WT	ENSG00000005189	11	16:20817979-20817984	TS	0.10865
NHA-WT	ENSG00000005189	12	16:20817985-20818019	TS	0.10865
NHA-WT	ENSG00000005189	13	16:20818020-20818027	TS	0.10865
NHA-WT	ENSG00000005189	16	16:20818044-20818057	AD	0
NHA-WT	ENSG00000005189	19	16:20818140-20818273	RI	0
NHA-WT	ENSG00000005189	59	16:20860721-20860802	TE	0
NHA-WT	ENSG00000005189	60	16:20860803-20860961	TE	0
NHA-WT	ENSG00000005189	61	16:20860962-20860987	TE	0
NHA-WT	ENSG00000005436	32	2:75891771-75891909	TE	0.321067
NHA-WT	ENSG00000005436	33	2:75891760-75891770	TE	0.321067
NHA-WT	ENSG00000005436	35	2:75891545-75891687	TE	0.885567
NHA-WT	ENSG00000005436	36	2:75891544-75891544	TE	0.885567
NHA-WT	ENSG00000005436	37	2:75889832-75891543	TE	0.885567
NHA-WT	ENSG00000005448	25	2:74652002-74652102	CE	0
NHA-WT	ENSG00000005448	28	2:74652202-74652223	AA	0
NHA-WT	ENSG00000005448	29	2:74652224-74652364	CE	0
NHA-WT	ENSG00000005483	36	7:104731663-104731761	CE	0
NHA-WT	ENSG00000005483	57	7:104752272-104752797	CE	0
NHA-WT	ENSG00000005483	58	7:104752798-104752916	RI	0
NHA-WT	ENSG00000005483	59	7:104752917-104752927	TE	0.774733
NHA-WT	ENSG00000005483	60	7:104752928-104754531	TE	0.774733
NHA-WT	ENSG00000005483	61	7:104754532-104754532	TE	0.774733
NHA-WT	ENSG00000005483	62	7:104754533-104754808	TE	0.774733
NHA-WT	ENSG00000005812	13	13:77581700-77581923	TE	0.263733
NHA-WT	ENSG00000005812	14	13:77579389-77581699	TE	0.263733
NHA-WT	ENSG00000005882	39	17:48187321-48187348	TE	0
NHA-WT	ENSG00000005882	40	17:48187349-48187573	TE	0
NHA-WT	ENSG00000005882	41	17:48187574-48188422	TE	0
NHA-WT	ENSG00000005882	42	17:48188423-48189516	TE	0
NHA-WT	ENSG00000005884	3	17:48133432-48133473	TS	0
NHA-WT	ENSG00000005884	4	17:48133474-48133801	TS	0
NHA-WT	ENSG00000005884	6	17:48133804-48133850	TS	0.8641
NHA-WT	ENSG00000005884	7	17:48133851-48134009	TS	0.8641
NHA-WT	ENSG00000005884	9	17:48141441-48141568	CE	0
NHA-WT	ENSG00000005889	31	X:24228310-24229716	TE	0.2362
NHA-WT	ENSG00000005889	32	X:24229717-24229817	TE	0.2362
NHA-WT	ENSG00000005889	33	X:24229818-24230103	TE	0.2362
NHA-WT	ENSG00000005889	34	X:24230104-24234206	TE	0.2362
NHA-WT	ENSG00000005889	35	X:24234207-24234372	TE	0.2362
NHA-WT	ENSG00000006015	9	19:18700223-18700288	AA	0
NHA-WT	ENSG00000006114	51	17:35879113-35879174	TE	0.19445
NHA-WT	ENSG00000006114	52	17:35878990-35879112	TE	0.19445
NHA-WT	ENSG00000006114	53	17:35878564-35878989	TE	0.19445
NHA-WT	ENSG00000006114	54	17:35877933-35878563	TE	0.19445
NHA-WT	ENSG00000006114	58	17:35875548-35875671	TE	0.4344
NHA-WT	ENSG00000006114	59	17:35874901-35875547	TE	0.4344
NHA-WT	ENSG00000006114	60	17:35874900-35874900	TE	0.4344
NHA-WT	ENSG00000006125	2	17:33913918-33914316	TS	0
NHA-WT	ENSG00000006125	3	17:33914317-33914332	TS	0
NHA-WT	ENSG00000006125	4	17:33914333-33914340	TS	0
NHA-WT	ENSG00000006125	5	17:33914341-33914385	TS	0
NHA-WT	ENSG00000006125	6	17:33914386-33914434	TS	0
NHA-WT	ENSG00000006125	7	17:33914435-33914447	TS	0
NHA-WT	ENSG00000006194	23	16:3340554-3341029	TE	0
NHA-WT	ENSG00000006194	24	16:3341030-3341460	TE	0
NHA-WT	ENSG00000006194	25	16:3349106-3349156	CE	0
NHA-WT	ENSG00000006194	26	16:3349157-3350912	RI	0
NHA-WT	ENSG00000006194	27	16:3350913-3351400	TE	0.1166
NHA-WT	ENSG00000006194	28	16:3351401-3351401	TE	0.1166
NHA-WT	ENSG00000006327	8	16:3070493-3070760	AD	0.605067
NHA-WT	ENSG00000006327	9	16:3070761-3071160	RI	0.333333
NHA-WT	ENSG00000006327	10	16:3071161-3071189	AA	0
NHA-WT	ENSG00000006327	13	16:3071216-3071320	CE	0
NHA-WT	ENSG00000006432	1	14:71276224-71276251	TS	0.5001
NHA-WT	ENSG00000006432	2	14:71275889-71276223	TS	0.5001
NHA-WT	ENSG00000006432	3	14:71275483-71275888	TS	0.5001
NHA-WT	ENSG00000006453	18	7:97933678-97933688	AA	0
NHA-WT	ENSG00000006453	19	7:97933508-97933677	CE	0
NHA-WT	ENSG00000006530	33	7:141352587-141352865	TE	0.330633
NHA-WT	ENSG00000006530	34	7:141352866-141352947	TE	0.330633
NHA-WT	ENSG00000006530	35	7:141352948-141355044	TE	0.330633
NHA-WT	ENSG00000006534	33	11:67795519-67795577	TE	1.12957
NHA-WT	ENSG00000006534	34	11:67795578-67795607	TE	1.12957
NHA-WT	ENSG00000006534	35	11:67795608-67795624	TE	1.12957
NHA-WT	ENSG00000006534	36	11:67795625-67796161	TE	1.12957
NHA-WT	ENSG00000006534	37	11:67796162-67796163	TE	1.12957
NHA-WT	ENSG00000006534	38	11:67796164-67796741	TE	1.12957
NHA-WT	ENSG00000006534	39	11:67796742-67796743	TE	1.12957
NHA-WT	ENSG00000006534	40	11:67796744-67796744	TE	1.12957
NHA-WT	ENSG00000006607	74	2:242433557-242433891	RI	0
NHA-WT	ENSG00000006607	75	2:242433892-242434255	TE	0.0202
NHA-WT	ENSG00000006607	76	2:242434256-242434256	TE	0.0202
NHA-WT	ENSG00000006634	1	7:87505531-87505543	TS	1.093
NHA-WT	ENSG00000006634	2	7:87505544-87505801	TS	1.093
NHA-WT	ENSG00000006634	3	7:87505802-87505848	TS	1.093
NHA-WT	ENSG00000006634	4	7:87505849-87505897	TS	1.093
NHA-WT	ENSG00000006634	5	7:87505898-87505914	TS	1.093
NHA-WT	ENSG00000006634	6	7:87505915-87506093	TS	1.093
NHA-WT	ENSG00000006652	11	7:112090563-112090632	AA	0
NHA-WT	ENSG00000006712	8	19:39880709-39880801	CE	0
NHA-WT	ENSG00000006712	29	19:39876555-39876859	TE	0.0215
NHA-WT	ENSG00000006712	30	19:39876493-39876554	TE	0.0215
NHA-WT	ENSG00000006712	31	19:39876492-39876492	TE	0.0215
NHA-WT	ENSG00000006740	36	17:12893349-12893901	TE	0.898133
NHA-WT	ENSG00000006740	37	17:12893902-12894959	TE	0.898133
NHA-WT	ENSG00000006740	38	17:12894960-12894960	TE	0.898133
NHA-WT	ENSG00000007001	14	2:158991260-158991739	TE	0.3512
NHA-WT	ENSG00000007001	15	2:158991740-158991810	TE	0.3512
NHA-WT	ENSG00000007001	16	2:158991811-158992478	TE	0.3512
NHA-WT	ENSG00000007001	17	2:158992479-158992666	TE	0.3512
NHA-WT	ENSG00000007168	42	17:2587208-2587794	TE	0.4725
NHA-WT	ENSG00000007168	43	17:2587795-2588909	TE	0.4725
NHA-WT	ENSG00000007341	2	1:113162406-113162418	TS	0.958167
NHA-WT	ENSG00000007341	3	1:113162397-113162405	TS	0.958167
NHA-WT	ENSG00000007341	4	1:113162295-113162396	TS	0.958167
NHA-WT	ENSG00000007341	5	1:113162287-113162294	TS	0.958167
NHA-WT	ENSG00000007341	6	1:113162266-113162286	TS	0.958167
NHA-WT	ENSG00000007341	9	1:113161819-113162018	AD	0
NHA-WT	ENSG00000007341	14	1:113161749-113161749	TS	0.30405
NHA-WT	ENSG00000007341	15	1:113161740-113161748	TS	0.30405
NHA-WT	ENSG00000007341	16	1:113161739-113161739	TS	0.30405
NHA-WT	ENSG00000007341	17	1:113161736-113161738	TS	0.30405
NHA-WT	ENSG00000007341	18	1:113161734-113161735	TS	0.30405
NHA-WT	ENSG00000007341	19	1:113161726-113161733	TS	0.30405
NHA-WT	ENSG00000007341	20	1:113161722-113161725	TS	0.30405
NHA-WT	ENSG00000007341	21	1:113161564-113161721	TS	0.30405
NHA-WT	ENSG00000007341	22	1:113161551-113161563	TS	0.30405
NHA-WT	ENSG00000007341	23	1:113161531-113161550	TS	0.30405
NHA-WT	ENSG00000007341	65	1:113068608-113068733	TE	0.4452
NHA-WT	ENSG00000007341	66	1:113068505-113068607	TE	0.4452
NHA-WT	ENSG00000007341	67	1:113068501-113068504	TE	0.4452
NHA-WT	ENSG00000007341	68	1:113068498-113068500	TE	0.4452
NHA-WT	ENSG00000007341	69	1:113068381-113068497	TE	0.4452
NHA-WT	ENSG00000007341	70	1:113068152-113068380	TE	0.4452
NHA-WT	ENSG00000007341	71	1:113067904-113068151	TE	0.4452
NHA-WT	ENSG00000007341	72	1:113066140-113067903	TE	0.4452
NHA-WT	ENSG00000007372	68	11:31811484-31811567	TE	0
NHA-WT	ENSG00000007372	69	11:31811470-31811483	TE	0
NHA-WT	ENSG00000007372	70	11:31811466-31811469	TE	0
NHA-WT	ENSG00000007372	71	11:31811465-31811465	TE	0
NHA-WT	ENSG00000007372	72	11:31811461-31811464	TE	0
NHA-WT	ENSG00000007372	73	11:31811378-31811460	TE	0
NHA-WT	ENSG00000007372	74	11:31810730-31811377	TE	0
NHA-WT	ENSG00000007372	75	11:31810460-31810729	TE	0
NHA-WT	ENSG00000007372	76	11:31810458-31810459	TE	0
NHA-WT	ENSG00000007372	77	11:31806340-31810457	TE	0
NHA-WT	ENSG00000007384	35	16:109825-110096	AA	0
NHA-WT	ENSG00000007384	46	16:108136-108758	TE	0.0034
NHA-WT	ENSG00000007384	47	16:108061-108135	TE	0.0034
NHA-WT	ENSG00000007384	48	16:108058-108060	TE	0.0034
NHA-WT	ENSG00000007402	50	3:50402097-50402237	TE	0
NHA-WT	ENSG00000007402	51	3:50400323-50402096	TE	0
NHA-WT	ENSG00000007402	52	3:50400286-50400322	TE	0
NHA-WT	ENSG00000007402	53	3:50400233-50400285	TE	0
NHA-WT	ENSG00000007516	51	16:1396848-1396934	AA	0
NHA-WT	ENSG00000007516	61	16:1398380-1398641	TE	0
NHA-WT	ENSG00000007516	62	16:1398642-1398756	TE	0
NHA-WT	ENSG00000007516	63	16:1398757-1398794	TE	0
NHA-WT	ENSG00000007516	64	16:1398795-1398795	TE	0
NHA-WT	ENSG00000007923	37	1:6695551-6695760	TE	0.210233
NHA-WT	ENSG00000007923	38	1:6695446-6695550	TE	0.210233
NHA-WT	ENSG00000007923	39	1:6695173-6695445	TE	0.210233
NHA-WT	ENSG00000007952	23	X:100098322-100098436	TE	0
NHA-WT	ENSG00000007952	24	X:100098313-100098321	TE	0
NHA-WT	ENSG00000008083	24	6:15520300-15520597	TE	0.258833
NHA-WT	ENSG00000008083	25	6:15520598-15522252	TE	0.258833
NHA-WT	ENSG00000008130	49	1:1684414-1684499	TE	0.0144333
NHA-WT	ENSG00000008130	50	1:1683910-1684413	TE	0.0144333
NHA-WT	ENSG00000008130	51	1:1682678-1683909	TE	0.0144333
NHA-WT	ENSG00000008130	52	1:1682671-1682677	TE	0.0144333
NHA-WT	ENSG00000008226	42	3:38158699-38158793	CE	0
NHA-WT	ENSG00000008226	43	3:38158794-38159017	RI	0
NHA-WT	ENSG00000008226	49	3:38163780-38164229	TE	0.5147
NHA-WT	ENSG00000008226	50	3:38164230-38165040	TE	0.5147
NHA-WT	ENSG00000008226	51	3:38165041-38165516	TE	0.5147
NHA-WT	ENSG00000008256	28	7:6204500-6204647	TE	0
NHA-WT	ENSG00000008256	29	7:6204371-6204499	TE	0
NHA-WT	ENSG00000008256	30	7:6201407-6204370	TE	0
NHA-WT	ENSG00000008277	52	7:87825786-87825806	TE	0
NHA-WT	ENSG00000008277	53	7:87825807-87825897	TE	0
NHA-WT	ENSG00000008277	54	7:87825898-87826072	TE	0
NHA-WT	ENSG00000008277	55	7:87826073-87826447	TE	0
NHA-WT	ENSG00000008277	56	7:87826448-87832204	TE	0
NHA-WT	ENSG00000008283	35	17:61511839-61511955	TE	1.3511
NHA-WT	ENSG00000008283	36	17:61511764-61511838	TE	1.3511
NHA-WT	ENSG00000008283	37	17:61511692-61511763	TE	1.3511
NHA-WT	ENSG00000008283	38	17:61511675-61511691	TE	1.3511
NHA-WT	ENSG00000008283	39	17:61511622-61511674	TE	1.3511
NHA-WT	ENSG00000008283	40	17:61511553-61511621	TE	1.3511
NHA-WT	ENSG00000008283	41	17:61511501-61511552	TE	1.3511
NHA-WT	ENSG00000008283	42	17:61511325-61511500	TE	1.3511
NHA-WT	ENSG00000008283	43	17:61511270-61511324	TE	1.3511
NHA-WT	ENSG00000008283	44	17:61510925-61511269	TE	1.3511
NHA-WT	ENSG00000008283	46	17:61510577-61510776	TE	0.51635
NHA-WT	ENSG00000008283	47	17:61510506-61510576	TE	0.51635
NHA-WT	ENSG00000008283	48	17:61509668-61510505	TE	0.51635
NHA-WT	ENSG00000008283	49	17:61509666-61509667	TE	0.51635
NHA-WT	ENSG00000008283	50	17:61509665-61509665	TE	0.51635
NHA-WT	ENSG00000008300	43	3:48674032-48675665	TE	0.0009
NHA-WT	ENSG00000008300	44	3:48673902-48674031	TE	0.0009
NHA-WT	ENSG00000008323	24	12:6428159-6428274	CE	0
NHA-WT	ENSG00000008323	31	12:6437302-6437651	TE	0.1467
NHA-WT	ENSG00000008323	32	12:6437652-6437671	TE	0.1467
NHA-WT	ENSG00000008323	33	12:6437672-6437672	TE	0.1467
NHA-WT	ENSG00000008382	16	19:4357250-4357336	AA	0
NHA-WT	ENSG00000008382	17	19:4357337-4357418	CE	0
NHA-WT	ENSG00000008382	19	19:4357948-4358079	AA	0
NHA-WT	ENSG00000008382	20	19:4358080-4358169	CE	0
NHA-WT	ENSG00000008382	23	19:4359913-4360035	TE	0.1396
NHA-WT	ENSG00000008382	24	19:4360036-4360065	TE	0.1396
NHA-WT	ENSG00000008382	25	19:4360066-4360069	TE	0.1396
NHA-WT	ENSG00000008382	26	19:4360070-4360076	TE	0.1396
NHA-WT	ENSG00000008382	27	19:4360077-4360078	TE	0.1396
NHA-WT	ENSG00000008382	28	19:4360079-4360083	TE	0.1396
NHA-WT	ENSG00000008441	34	19:13205449-13205463	TE	0.219233
NHA-WT	ENSG00000008441	35	19:13205464-13205498	TE	0.219233
NHA-WT	ENSG00000008441	36	19:13205499-13205569	TE	0.219233
NHA-WT	ENSG00000008441	37	19:13205570-13205572	TE	0.219233
NHA-WT	ENSG00000008441	38	19:13205573-13205584	TE	0.219233
NHA-WT	ENSG00000008441	39	19:13205585-13207015	TE	0.219233
NHA-WT	ENSG00000008441	40	19:13207016-13209610	TE	0.219233
NHA-WT	ENSG00000008516	8	16:3107034-3107210	CE	0
NHA-WT	ENSG00000008710	143	16:2139528-2140195	TE	0.189267
NHA-WT	ENSG00000008710	144	16:2138711-2139527	TE	0.189267
NHA-WT	ENSG00000008853	19	8:22865506-22865624	CE	0
NHA-WT	ENSG00000008853	24	8:22874765-22875954	TE	0.9614
NHA-WT	ENSG00000008853	25	8:22875955-22877705	TE	0.9614
NHA-WT	ENSG00000008853	26	8:22877706-22877712	TE	0.9614
NHA-WT	ENSG00000009307	44	1:115261234-115261366	CE	0
NHA-WT	ENSG00000009413	54	6:111620278-111621359	TE	0.555933
NHA-WT	ENSG00000009413	55	6:111620234-111620277	TE	0.555933
NHA-WT	ENSG00000009790	27	1:209948787-209948834	AD	0
NHA-WT	ENSG00000009790	42	1:209952720-209952775	RI	0
NHA-WT	ENSG00000009790	43	1:209952776-209952998	TE	0
NHA-WT	ENSG00000009790	44	1:209952999-209953000	TE	0
NHA-WT	ENSG00000009790	45	1:209953001-209953001	TE	0
NHA-WT	ENSG00000009790	47	1:209953815-209953951	CE	0
NHA-WT	ENSG00000009790	49	1:209954690-209954694	AA	0
NHA-WT	ENSG00000009790	51	1:209955401-209955425	AA	0
NHA-WT	ENSG00000009790	52	1:209955426-209955528	TE	0
NHA-WT	ENSG00000009790	53	1:209955529-209955652	TE	0
NHA-WT	ENSG00000009790	54	1:209955653-209955658	TE	0
NHA-WT	ENSG00000009790	55	1:209955659-209955660	TE	0
NHA-WT	ENSG00000009790	56	1:209955661-209955664	TE	0
NHA-WT	ENSG00000009790	57	1:209955665-209955665	TE	0
NHA-WT	ENSG00000009790	58	1:209955666-209955668	TE	0
NHA-WT	ENSG00000009830	1	14:77787204-77787227	TS	0.981533
NHA-WT	ENSG00000009830	2	14:77787048-77787203	TS	0.981533
NHA-WT	ENSG00000009830	3	14:77786777-77787047	TS	0.981533
NHA-WT	ENSG00000010017	14	6:13632602-13632753	CE	0
NHA-WT	ENSG00000010017	16	6:13622594-13622724	TE	0
NHA-WT	ENSG00000010017	17	6:13622565-13622593	TE	0
NHA-WT	ENSG00000010017	18	6:13621730-13622564	TE	0
NHA-WT	ENSG00000010030	1	6:36355561-36356164	TS	0
NHA-WT	ENSG00000010030	2	6:36355494-36355560	TS	0
NHA-WT	ENSG00000010030	3	6:36355313-36355493	TS	0
NHA-WT	ENSG00000010072	1	1:231472850-231473793	TS	0
NHA-WT	ENSG00000010072	2	1:231473794-231474001	TS	0
NHA-WT	ENSG00000010072	3	1:231474002-231474040	TS	0
NHA-WT	ENSG00000010072	4	1:231474041-231474350	TS	0
NHA-WT	ENSG00000010072	14	1:231488356-231488500	TE	0.0893333
NHA-WT	ENSG00000010072	15	1:231488501-231488510	TE	0.0893333
NHA-WT	ENSG00000010072	16	1:231488511-231488878	TE	0.0893333
NHA-WT	ENSG00000010072	17	1:231488879-231490769	TE	0.0893333
NHA-WT	ENSG00000010256	33	3:48636626-48637067	RI	0
NHA-WT	ENSG00000010292	5	12:6602670-6602713	AD	0
NHA-WT	ENSG00000010292	6	12:6602714-6603241	AD	0
NHA-WT	ENSG00000010292	62	12:6640493-6640642	TE	0
NHA-WT	ENSG00000010292	63	12:6640643-6641121	TE	0
NHA-WT	ENSG00000010295	18	12:6648773-6649754	TE	0
NHA-WT	ENSG00000010295	19	12:6648743-6648772	TE	0
NHA-WT	ENSG00000010295	20	12:6648705-6648742	TE	0
NHA-WT	ENSG00000010295	21	12:6648694-6648704	TE	0
NHA-WT	ENSG00000010310	28	19:46184987-46185246	TE	0.474933
NHA-WT	ENSG00000010310	29	19:46185247-46185251	TE	0.474933
NHA-WT	ENSG00000010310	30	19:46185252-46185413	TE	0.474933
NHA-WT	ENSG00000010310	31	19:46185414-46186982	TE	0.474933
NHA-WT	ENSG00000010327	96	3:52558316-52558509	TE	0
NHA-WT	ENSG00000010327	97	3:52558510-52558511	TE	0
NHA-WT	ENSG00000010361	43	19:50311671-50311745	CE	0
NHA-WT	ENSG00000010361	44	19:50311417-50311670	RI	0
NHA-WT	ENSG00000010361	51	19:50310338-50310396	TE	0.322133
NHA-WT	ENSG00000010361	52	19:50310177-50310337	TE	0.322133
NHA-WT	ENSG00000010361	53	19:50310154-50310176	TE	0.322133
NHA-WT	ENSG00000010361	54	19:50310150-50310153	TE	0.322133
NHA-WT	ENSG00000010361	55	19:50310147-50310149	TE	0.322133
NHA-WT	ENSG00000010361	56	19:50310142-50310146	TE	0.322133
NHA-WT	ENSG00000010361	57	19:50310126-50310141	TE	0.322133
NHA-WT	ENSG00000010404	32	X:148564074-148564749	TE	0
NHA-WT	ENSG00000010404	33	X:148563758-148564073	TE	0
NHA-WT	ENSG00000010404	34	X:148558521-148563757	TE	0
NHA-WT	ENSG00000010610	22	12:6923467-6923629	AD	0
NHA-WT	ENSG00000010610	23	12:6923630-6923924	RI	0
NHA-WT	ENSG00000010610	27	12:6924897-6925221	AA	0
NHA-WT	ENSG00000010610	28	12:6925222-6925370	TE	0
NHA-WT	ENSG00000010610	29	12:6925371-6925447	TE	0
NHA-WT	ENSG00000010610	30	12:6925448-6925523	TE	0
NHA-WT	ENSG00000010610	35	12:6928465-6928997	TE	0
NHA-WT	ENSG00000010610	36	12:6928998-6929974	TE	0
NHA-WT	ENSG00000010704	26	6:26094632-26094716	TE	0.3445
NHA-WT	ENSG00000010704	27	6:26094717-26094781	TE	0.3445
NHA-WT	ENSG00000010704	28	6:26094782-26095215	TE	0.3445
NHA-WT	ENSG00000010704	29	6:26095216-26095248	TE	0.3445
NHA-WT	ENSG00000010704	30	6:26095249-26095445	TE	0.3445
NHA-WT	ENSG00000010704	31	6:26095446-26098571	TE	0.3445
NHA-WT	ENSG00000010803	22	1:41512090-41512270	CE	0
NHA-WT	ENSG00000010803	32	1:41493829-41493991	CE	0
NHA-WT	ENSG00000010803	33	1:41493148-41493828	RI	0
NHA-WT	ENSG00000010803	34	1:41492876-41493147	TE	0
NHA-WT	ENSG00000010803	35	1:41492874-41492875	TE	0
NHA-WT	ENSG00000010803	36	1:41492872-41492873	TE	0
NHA-WT	ENSG00000011007	14	1:24086002-24086383	TE	0
NHA-WT	ENSG00000011007	15	1:24086384-24088549	TE	0
NHA-WT	ENSG00000011009	19	1:24120816-24120916	RI	0
NHA-WT	ENSG00000011009	22	1:24121042-24121090	CE	0
NHA-WT	ENSG00000011009	23	1:24121091-24121171	RI	0.2976
NHA-WT	ENSG00000011009	24	1:24121172-24121202	TE	0.333567
NHA-WT	ENSG00000011009	25	1:24121203-24121235	TE	0.333567
NHA-WT	ENSG00000011009	26	1:24121236-24121360	TE	0.333567
NHA-WT	ENSG00000011009	27	1:24121361-24121365	TE	0.333567
NHA-WT	ENSG00000011009	28	1:24121366-24121445	TE	0.333567
NHA-WT	ENSG00000011009	29	1:24121446-24121571	TE	0.333567
NHA-WT	ENSG00000011009	30	1:24121572-24121767	TE	0.333567
NHA-WT	ENSG00000011009	31	1:24121768-24122027	TE	0.333567
NHA-WT	ENSG00000011009	32	1:24122028-24122029	TE	0.333567
NHA-WT	ENSG00000011028	1	17:60704762-60705045	TS	0.46585
NHA-WT	ENSG00000011028	2	17:60705046-60705281	TS	0.46585
NHA-WT	ENSG00000011258	29	17:49254788-49258055	TE	0.579467
NHA-WT	ENSG00000011258	30	17:49254786-49254787	TE	0.579467
NHA-WT	ENSG00000011295	1	17:15902694-15902781	TS	0
NHA-WT	ENSG00000011295	2	17:15902782-15903097	TS	0
NHA-WT	ENSG00000011295	3	17:15903098-15903115	TS	0
NHA-WT	ENSG00000011295	4	17:15903116-15903137	TS	0
NHA-WT	ENSG00000011295	5	17:15903138-15903147	TS	0
NHA-WT	ENSG00000011295	6	17:15903148-15903346	TS	0
NHA-WT	ENSG00000011295	24	17:15928402-15928465	TS	0
NHA-WT	ENSG00000011295	25	17:15928466-15928485	TS	0
NHA-WT	ENSG00000011295	26	17:15929854-15930016	CE	0
NHA-WT	ENSG00000011295	29	17:15930688-15930849	TE	0.0777
NHA-WT	ENSG00000011295	30	17:15930850-15932096	TE	0.0777
NHA-WT	ENSG00000011295	31	17:15932097-15932100	TE	0.0777
NHA-WT	ENSG00000011295	32	17:15932101-15932226	TE	0.0777
NHA-WT	ENSG00000011332	20	19:38708438-38708516	CE	0
NHA-WT	ENSG00000011332	30	19:38704284-38704396	CE	0
NHA-WT	ENSG00000011332	33	19:38702712-38702773	TE	0.406433
NHA-WT	ENSG00000011332	34	19:38702705-38702711	TE	0.406433
NHA-WT	ENSG00000011332	35	19:38702614-38702704	TE	0.406433
NHA-WT	ENSG00000011332	36	19:38702602-38702613	TE	0.406433
NHA-WT	ENSG00000011332	37	19:38702395-38702601	TE	0.406433
NHA-WT	ENSG00000011332	38	19:38702357-38702394	TE	0.406433
NHA-WT	ENSG00000011332	39	19:38702343-38702356	TE	0.406433
NHA-WT	ENSG00000011332	40	19:38702342-38702342	TE	0.406433
NHA-WT	ENSG00000011332	41	19:38702340-38702341	TE	0.406433
NHA-WT	ENSG00000011332	42	19:38701683-38702339	TE	0.406433
NHA-WT	ENSG00000011332	43	19:38701649-38701682	TE	0.406433
NHA-WT	ENSG00000011332	44	19:38701646-38701648	TE	0.406433
NHA-WT	ENSG00000011405	43	11:17110867-17111467	TE	0
NHA-WT	ENSG00000011405	44	11:17108119-17110866	TE	0
NHA-WT	ENSG00000011426	29	7:36458853-36459088	CE	0
NHA-WT	ENSG00000011454	53	9:125865370-125865547	TE	0.303667
NHA-WT	ENSG00000011454	54	9:125865548-125865845	TE	0.303667
NHA-WT	ENSG00000011454	55	9:125865846-125867145	TE	0.303667
NHA-WT	ENSG00000011523	11	2:65299704-65300017	RI	0
NHA-WT	ENSG00000011523	12	2:65300018-65300114	CE	0
NHA-WT	ENSG00000011523	13	2:65300115-65301069	RI	0
NHA-WT	ENSG00000011523	14	2:65301070-65301283	CE	0
NHA-WT	ENSG00000011523	15	2:65301284-65301312	AD	0
NHA-WT	ENSG00000011523	17	2:65301539-65301618	TE	0
NHA-WT	ENSG00000011523	18	2:65301619-65302385	TE	0
NHA-WT	ENSG00000011590	11	19:36205425-36206364	AA	0
NHA-WT	ENSG00000011590	16	19:36207380-36207399	TE	0
NHA-WT	ENSG00000011590	17	19:36207400-36207940	TE	0
NHA-WT	ENSG00000012061	5	19:45927624-45927625	TS	0.0092
NHA-WT	ENSG00000012061	6	19:45927197-45927623	TS	0.0092
NHA-WT	ENSG00000012061	7	19:45927131-45927196	TS	0.0092
NHA-WT	ENSG00000012061	8	19:45927098-45927130	TS	0.0092
NHA-WT	ENSG00000012061	9	19:45927081-45927097	TS	0.0092
NHA-WT	ENSG00000012061	33	19:45912926-45912983	TE	0.0613667
NHA-WT	ENSG00000012061	34	19:45912877-45912925	TE	0.0613667
NHA-WT	ENSG00000012061	35	19:45912874-45912876	TE	0.0613667
NHA-WT	ENSG00000012061	36	19:45912872-45912873	TE	0.0613667
NHA-WT	ENSG00000012061	37	19:45912804-45912871	TE	0.0613667
NHA-WT	ENSG00000012061	38	19:45910592-45912803	TE	0.0613667
NHA-WT	ENSG00000012061	39	19:45910591-45910591	TE	0.0613667
NHA-WT	ENSG00000012211	24	X:49032022-49032342	TE	0
NHA-WT	ENSG00000012211	25	X:49031970-49032021	TE	0
NHA-WT	ENSG00000012211	26	X:49031731-49031969	TE	0
NHA-WT	ENSG00000012211	27	X:49031613-49031730	TE	0
NHA-WT	ENSG00000012211	28	X:49031151-49031612	TE	0
NHA-WT	ENSG00000012232	43	8:28610178-28610349	TE	0
NHA-WT	ENSG00000012232	44	8:28610350-28611204	TE	0
NHA-WT	ENSG00000012232	45	8:28611205-28613116	TE	0
NHA-WT	ENSG00000012660	21	6:53133557-53134068	TE	0.55295
NHA-WT	ENSG00000012660	22	6:53132203-53133556	TE	0.55295
NHA-WT	ENSG00000012660	23	6:53132197-53132202	TE	0.55295
NHA-WT	ENSG00000012660	24	6:53132196-53132196	TE	0.55295
NHA-WT	ENSG00000012779	25	10:45940956-45941392	TE	0
NHA-WT	ENSG00000012779	26	10:45941393-45941561	TE	0
NHA-WT	ENSG00000013288	26	4:6619220-6620521	RI	0
NHA-WT	ENSG00000013288	29	4:6621654-6621771	CE	0
NHA-WT	ENSG00000013288	30	4:6621772-6622914	RI	0
NHA-WT	ENSG00000013288	31	4:6622915-6623081	TE	1.38823
NHA-WT	ENSG00000013288	32	4:6623082-6624128	TE	1.38823
NHA-WT	ENSG00000013288	33	4:6624129-6625089	TE	1.38823
NHA-WT	ENSG00000013297	14	3:170150975-170151214	TE	0
NHA-WT	ENSG00000013297	15	3:170151215-170151880	TE	0
NHA-WT	ENSG00000013297	16	3:170151881-170151887	TE	0
NHA-WT	ENSG00000013375	37	6:83878961-83879042	CE	0
NHA-WT	ENSG00000013375	42	6:83875849-83876185	TE	0.331867
NHA-WT	ENSG00000013375	43	6:83874592-83875848	TE	0.331867
NHA-WT	ENSG00000013392	5	6:83904372-83905313	RI	0
NHA-WT	ENSG00000013392	6	6:83905314-83906382	TE	0.3322
NHA-WT	ENSG00000013392	7	6:83906383-83908651	TE	0.3322
NHA-WT	ENSG00000013563	26	X:153631063-153631182	TE	0.128433
NHA-WT	ENSG00000013563	27	X:153630828-153631062	TE	0.128433
NHA-WT	ENSG00000013563	28	X:153630102-153630827	TE	0.128433
NHA-WT	ENSG00000013563	29	X:153630099-153630101	TE	0.128433
NHA-WT	ENSG00000013563	30	X:153629579-153630098	TE	0.128433
NHA-WT	ENSG00000013573	1	12:31226779-31226793	TS	0
NHA-WT	ENSG00000013573	2	12:31226794-31226801	TS	0
NHA-WT	ENSG00000013573	3	12:31226802-31226809	TS	0
NHA-WT	ENSG00000013573	4	12:31226810-31226812	TS	0
NHA-WT	ENSG00000013573	5	12:31226813-31226815	TS	0
NHA-WT	ENSG00000013573	6	12:31226816-31226824	TS	0
NHA-WT	ENSG00000013573	7	12:31226825-31226825	TS	0
NHA-WT	ENSG00000013573	8	12:31226826-31226827	TS	0
NHA-WT	ENSG00000013573	9	12:31226828-31226831	TS	0
NHA-WT	ENSG00000013573	10	12:31226832-31226835	TS	0
NHA-WT	ENSG00000013573	11	12:31226836-31226842	TS	0
NHA-WT	ENSG00000013573	12	12:31226843-31226903	TS	0
NHA-WT	ENSG00000013573	13	12:31226904-31227025	AD	0
NHA-WT	ENSG00000013583	10	12:13128249-13128413	TE	0
NHA-WT	ENSG00000013583	11	12:13127798-13128248	TE	0
NHA-WT	ENSG00000013588	1	12:13043716-13044492	TS	0
NHA-WT	ENSG00000013588	2	12:13044493-13044512	TS	0
NHA-WT	ENSG00000013588	3	12:13044513-13044598	TS	0
NHA-WT	ENSG00000013588	11	12:13065381-13065443	TE	0
NHA-WT	ENSG00000013588	12	12:13065444-13066067	TE	0
NHA-WT	ENSG00000013588	13	12:13066068-13070871	TE	0
NHA-WT	ENSG00000014641	1	2:63815743-63816091	TS	0
NHA-WT	ENSG00000014641	2	2:63816092-63816096	TS	0
NHA-WT	ENSG00000014641	3	2:63816097-63816106	TS	0
NHA-WT	ENSG00000014641	4	2:63816107-63816112	TS	0
NHA-WT	ENSG00000014641	5	2:63816113-63816115	TS	0
NHA-WT	ENSG00000014641	6	2:63816116-63816118	TS	0
NHA-WT	ENSG00000014641	7	2:63816119-63816130	TS	0
NHA-WT	ENSG00000014641	8	2:63816131-63816131	TS	0
NHA-WT	ENSG00000014641	9	2:63816132-63816180	TS	0
NHA-WT	ENSG00000014824	7	4:42022433-42022532	CE	1
NHA-WT	ENSG00000014824	25	4:42088099-42088386	TE	0
NHA-WT	ENSG00000014824	26	4:42088387-42088393	TE	0
NHA-WT	ENSG00000014824	27	4:42088394-42092474	TE	0
NHA-WT	ENSG00000014919	9	10:101476105-101476218	CE	0
NHA-WT	ENSG00000014919	10	10:101474409-101474475	TE	0
NHA-WT	ENSG00000014919	11	10:101473272-101474408	TE	0
NHA-WT	ENSG00000015171	1	10:180405-180423	TS	0
NHA-WT	ENSG00000015171	2	10:180424-180642	TS	0
NHA-WT	ENSG00000015171	3	10:180643-180726	TS	0
NHA-WT	ENSG00000015475	17	22:18218318-18218357	TE	0.0847333
NHA-WT	ENSG00000015475	18	22:18218265-18218317	TE	0.0847333
NHA-WT	ENSG00000015475	19	22:18217988-18218264	TE	0.0847333
NHA-WT	ENSG00000015475	20	22:18216941-18217987	TE	0.0847333
NHA-WT	ENSG00000015475	21	22:18216937-18216940	TE	0.0847333
NHA-WT	ENSG00000015475	22	22:18216908-18216936	TE	0.0847333
NHA-WT	ENSG00000015475	23	22:18216906-18216907	TE	0.0847333
NHA-WT	ENSG00000015532	15	17:48434418-48434478	AA	0
NHA-WT	ENSG00000015532	22	17:48437330-48438512	AL	0
NHA-WT	ENSG00000015568	3	2:110551851-110551881	TS	0
NHA-WT	ENSG00000015568	4	2:110551882-110551884	TS	0
NHA-WT	ENSG00000015568	5	2:110551885-110551976	TS	0
NHA-WT	ENSG00000015568	6	2:110551977-110552114	TS	0
NHA-WT	ENSG00000016864	1	3:52739857-52740048	TS	0
NHA-WT	ENSG00000016864	2	3:52739808-52739856	TS	0
NHA-WT	ENSG00000016864	3	3:52739803-52739807	TS	0
NHA-WT	ENSG00000016864	4	3:52739798-52739802	TS	0
NHA-WT	ENSG00000016864	5	3:52739788-52739797	TS	0
NHA-WT	ENSG00000016864	6	3:52739781-52739787	TS	0
NHA-WT	ENSG00000016864	7	3:52739719-52739780	TS	0
NHA-WT	ENSG00000016864	33	3:52730335-52730557	RI	0
NHA-WT	ENSG00000016864	37	3:52729944-52730056	CE	0
NHA-WT	ENSG00000016864	38	3:52729604-52729943	RI	0
NHA-WT	ENSG00000016864	39	3:52729437-52729603	CE	0
NHA-WT	ENSG00000016864	40	3:52729319-52729436	RI	0
NHA-WT	ENSG00000016864	43	3:52728915-52729051	TE	0.715867
NHA-WT	ENSG00000016864	44	3:52728818-52728914	TE	0.715867
NHA-WT	ENSG00000016864	45	3:52728688-52728817	TE	0.715867
NHA-WT	ENSG00000016864	46	3:52728519-52728687	TE	0.715867
NHA-WT	ENSG00000016864	47	3:52728508-52728518	TE	0.715867
NHA-WT	ENSG00000016864	48	3:52728505-52728507	TE	0.715867
NHA-WT	ENSG00000017260	69	3:130734996-130735400	TE	0.6472
NHA-WT	ENSG00000017260	70	3:130735401-130735481	TE	0.6472
NHA-WT	ENSG00000017260	71	3:130735482-130735513	TE	0.6472
NHA-WT	ENSG00000017260	72	3:130735514-130735528	TE	0.6472
NHA-WT	ENSG00000017260	73	3:130735529-130735556	TE	0.6472
NHA-WT	ENSG00000017621	12	X:49021045-49021127	CE	0
NHA-WT	ENSG00000017621	13	X:49021128-49021200	RI	0
NHA-WT	ENSG00000017621	14	X:49021201-49021245	AA	0
NHA-WT	ENSG00000017621	17	X:49022413-49022427	AA	0
NHA-WT	ENSG00000017621	18	X:49022428-49022552	TE	0.6887
NHA-WT	ENSG00000017621	19	X:49022553-49022553	TE	0.6887
NHA-WT	ENSG00000017621	20	X:49022554-49022562	TE	0.6887
NHA-WT	ENSG00000017621	21	X:49022563-49022971	TE	0.6887
NHA-WT	ENSG00000017621	22	X:49022972-49022972	TE	0.6887
NHA-WT	ENSG00000017621	23	X:49022973-49024822	TE	0.6887
NHA-WT	ENSG00000017797	19	18:9535669-9538112	TE	0.7455
NHA-WT	ENSG00000017797	20	18:9538113-9538114	TE	0.7455
NHA-WT	ENSG00000018280	59	2:219260362-219260749	TE	0.297
NHA-WT	ENSG00000018280	60	2:219260750-219260750	TE	0.297
NHA-WT	ENSG00000018280	61	2:219260751-219261617	TE	0.297
NHA-WT	ENSG00000018408	16	3:149375471-149375551	AD	0
NHA-WT	ENSG00000018408	33	3:149238628-149238776	TE	0.31955
NHA-WT	ENSG00000018408	34	3:149238509-149238627	TE	0.31955
NHA-WT	ENSG00000018408	35	3:149238486-149238508	TE	0.31955
NHA-WT	ENSG00000018408	36	3:149238397-149238485	TE	0.31955
NHA-WT	ENSG00000018408	37	3:149238032-149238396	TE	0.31955
NHA-WT	ENSG00000018408	38	3:149235022-149238031	TE	0.31955
NHA-WT	ENSG00000018610	3	X:118699088-118699194	AD	0
NHA-WT	ENSG00000018610	6	X:118678316-118678454	CE	0
NHA-WT	ENSG00000018610	8	X:118676468-118676557	CE	0
NHA-WT	ENSG00000018610	9	X:118675291-118675383	CE	0
NHA-WT	ENSG00000018869	13	19:56896251-56896553	TE	0.138467
NHA-WT	ENSG00000018869	14	19:56896242-56896250	TE	0.138467
NHA-WT	ENSG00000018869	15	19:56895139-56896241	TE	0.138467
NHA-WT	ENSG00000018869	16	19:56894121-56895138	TE	0.138467
NHA-WT	ENSG00000019102	7	11:124618286-124618430	CE	0
NHA-WT	ENSG00000019582	21	5:149782126-149782188	CE	0
NHA-WT	ENSG00000019582	22	5:149781814-149782125	RI	0
NHA-WT	ENSG00000019582	26	5:149781427-149781567	TE	0.49725
NHA-WT	ENSG00000019582	27	5:149781262-149781426	TE	0.49725
NHA-WT	ENSG00000019582	28	5:149781233-149781261	TE	0.49725
NHA-WT	ENSG00000019582	29	5:149781200-149781232	TE	0.49725
NHA-WT	ENSG00000019991	22	7:81381232-81381435	TE	0
NHA-WT	ENSG00000019991	23	7:81380205-81381231	TE	0
NHA-WT	ENSG00000019991	38	7:81331897-81332073	TE	0
NHA-WT	ENSG00000019991	39	7:81328322-81331896	TE	0
NHA-WT	ENSG00000020181	22	8:37698604-37701494	TE	0
NHA-WT	ENSG00000020181	23	8:37701495-37702414	TE	0
NHA-WT	ENSG00000020256	16	20:50721390-50721462	TS	0.44185
NHA-WT	ENSG00000020256	17	20:50721192-50721389	TS	0.44185
NHA-WT	ENSG00000020633	5	1:25291071-25291159	AA	0
NHA-WT	ENSG00000020633	6	1:25291005-25291070	CE	0
NHA-WT	ENSG00000020922	1	11:94227052-94227074	TS	0
NHA-WT	ENSG00000020922	2	11:94227041-94227051	TS	0
NHA-WT	ENSG00000020922	3	11:94227016-94227040	TS	0
NHA-WT	ENSG00000020922	4	11:94227015-94227015	TS	0
NHA-WT	ENSG00000020922	5	11:94227010-94227014	TS	0
NHA-WT	ENSG00000020922	6	11:94227001-94227009	TS	0
NHA-WT	ENSG00000020922	7	11:94226980-94227000	TS	0
NHA-WT	ENSG00000020922	8	11:94226979-94226979	TS	0
NHA-WT	ENSG00000020922	9	11:94226957-94226978	TS	0
NHA-WT	ENSG00000020922	10	11:94226887-94226956	AD	0
NHA-WT	ENSG00000021300	49	11:73373556-73373857	TE	0
NHA-WT	ENSG00000021300	50	11:73373858-73373860	TE	0
NHA-WT	ENSG00000021300	51	11:73373861-73373864	TE	0
NHA-WT	ENSG00000021355	15	6:2833934-2834246	AA	0
NHA-WT	ENSG00000021355	16	6:2833746-2833933	TE	0.155433
NHA-WT	ENSG00000021355	17	6:2833642-2833745	TE	0.155433
NHA-WT	ENSG00000021355	18	6:2832566-2833641	TE	0.155433
NHA-WT	ENSG00000021574	18	2:32379443-32382705	TE	0.9341
NHA-WT	ENSG00000021574	19	2:32382706-32382706	TE	0.9341
NHA-WT	ENSG00000022267	24	X:135289350-135289710	TE	0
NHA-WT	ENSG00000022267	25	X:135289711-135289820	TE	0
NHA-WT	ENSG00000022267	34	X:135292030-135292113	TE	0.577133
NHA-WT	ENSG00000022267	35	X:135292114-135292226	TE	0.577133
NHA-WT	ENSG00000022267	36	X:135292227-135293518	TE	0.577133
NHA-WT	ENSG00000022567	20	8:142220700-142221796	TE	0.662333
NHA-WT	ENSG00000022567	21	8:142220628-142220699	TE	0.662333
NHA-WT	ENSG00000022567	22	8:142217265-142220627	TE	0.662333
NHA-WT	ENSG00000022840	70	12:121014393-121014681	TE	0.332933
NHA-WT	ENSG00000022840	71	12:121014682-121014685	TE	0.332933
NHA-WT	ENSG00000022840	72	12:121014686-121014689	TE	0.332933
NHA-WT	ENSG00000022840	73	12:121014690-121014691	TE	0.332933
NHA-WT	ENSG00000022840	74	12:121014692-121015050	TE	0.332933
NHA-WT	ENSG00000022840	75	12:121015051-121015397	TE	0.332933
NHA-WT	ENSG00000022976	23	14:102807660-102807856	AA	0
NHA-WT	ENSG00000022976	26	14:102808440-102808701	TE	0.331833
NHA-WT	ENSG00000022976	27	14:102808702-102808704	TE	0.331833
NHA-WT	ENSG00000022976	28	14:102808705-102809039	TE	0.331833
NHA-WT	ENSG00000022976	29	14:102809040-102809044	TE	0.331833
NHA-WT	ENSG00000023191	21	11:504997-505377	RI	0
NHA-WT	ENSG00000023191	22	11:504889-504996	AA	0
NHA-WT	ENSG00000023191	23	11:504824-504888	CE	0
NHA-WT	ENSG00000023191	25	11:503184-503570	TS	0.786567
NHA-WT	ENSG00000023191	26	11:502250-503183	TS	0.786567
NHA-WT	ENSG00000023191	33	11:500655-500738	AA	0
NHA-WT	ENSG00000023191	36	11:500484-500541	AD	0
NHA-WT	ENSG00000023191	37	11:500000-500483	RI	0
NHA-WT	ENSG00000023191	38	11:499924-499999	AA	0
NHA-WT	ENSG00000023191	43	11:499501-499600	TE	0
NHA-WT	ENSG00000023191	44	11:499400-499500	TE	0
NHA-WT	ENSG00000023191	46	11:499062-499185	TE	0.7704
NHA-WT	ENSG00000023191	47	11:499047-499061	TE	0.7704
NHA-WT	ENSG00000023191	48	11:499031-499046	TE	0.7704
NHA-WT	ENSG00000023191	53	11:498516-498627	AA	0
NHA-WT	ENSG00000023191	54	11:498457-498515	CE	0
NHA-WT	ENSG00000023191	58	11:494779-494882	RI	0
NHA-WT	ENSG00000023191	59	11:494561-494778	TE	0
NHA-WT	ENSG00000023191	60	11:494552-494560	TE	0
NHA-WT	ENSG00000023191	61	11:494548-494551	TE	0
NHA-WT	ENSG00000023191	62	11:494546-494547	TE	0
NHA-WT	ENSG00000023191	63	11:494544-494545	TE	0
NHA-WT	ENSG00000023191	64	11:494523-494543	TE	0
NHA-WT	ENSG00000023191	65	11:494516-494522	TE	0
NHA-WT	ENSG00000023191	66	11:494515-494515	TE	0
NHA-WT	ENSG00000023191	67	11:494513-494514	TE	0
NHA-WT	ENSG00000023191	68	11:494512-494512	TE	0
NHA-WT	ENSG00000023287	2	8:53627005-53627026	TS	0
NHA-WT	ENSG00000023287	3	8:53626998-53627004	TS	0
NHA-WT	ENSG00000023287	4	8:53626993-53626997	TS	0
NHA-WT	ENSG00000023287	5	8:53626988-53626992	TS	0
NHA-WT	ENSG00000023287	6	8:53626984-53626987	TS	0
NHA-WT	ENSG00000023287	7	8:53626635-53626983	TS	0
NHA-WT	ENSG00000023734	14	12:16052838-16052987	CE	0
NHA-WT	ENSG00000023734	16	12:16053881-16053946	CE	0
NHA-WT	ENSG00000024526	22	1:68942580-68942752	TE	0
NHA-WT	ENSG00000024526	23	1:68941257-68942579	TE	0
NHA-WT	ENSG00000024526	24	1:68939835-68941256	TE	0
NHA-WT	ENSG00000025293	48	20:34535407-34538288	TE	0.0039
NHA-WT	ENSG00000025293	49	20:34538289-34538303	TE	0.0039
NHA-WT	ENSG00000025434	3	11:47270190-47270230	AA	0
NHA-WT	ENSG00000025434	4	11:47270231-47270415	CE	0
NHA-WT	ENSG00000025708	1	22:50968462-50968485	TS	0.3534
NHA-WT	ENSG00000025708	2	22:50968448-50968461	TS	0.3534
NHA-WT	ENSG00000025708	3	22:50968445-50968447	TS	0.3534
NHA-WT	ENSG00000025708	4	22:50968442-50968444	TS	0.3534
NHA-WT	ENSG00000025708	5	22:50968429-50968441	TS	0.3534
NHA-WT	ENSG00000025708	6	22:50968426-50968428	TS	0.3534
NHA-WT	ENSG00000025708	7	22:50968420-50968425	TS	0.3534
NHA-WT	ENSG00000025708	8	22:50968333-50968419	TS	0.3534
NHA-WT	ENSG00000025708	9	22:50968184-50968332	RI	0
NHA-WT	ENSG00000025708	10	22:50968161-50968183	AA	0
NHA-WT	ENSG00000025708	11	22:50968149-50968160	AA	0
NHA-WT	ENSG00000025708	12	22:50967925-50968148	CE	0
NHA-WT	ENSG00000025708	13	22:50967768-50967924	RI	0
NHA-WT	ENSG00000025708	14	22:50967565-50967767	CE	0
NHA-WT	ENSG00000025708	15	22:50967040-50967564	RI	0
NHA-WT	ENSG00000025708	16	22:50966941-50967039	CE	0
NHA-WT	ENSG00000025708	21	22:50964675-50964905	CE	0
NHA-WT	ENSG00000025708	22	22:50964586-50964674	RI	0
NHA-WT	ENSG00000025708	23	22:50964571-50964585	AA	0
NHA-WT	ENSG00000025708	25	22:50964214-50964347	TE	0.82685
NHA-WT	ENSG00000025708	26	22:50964186-50964213	TE	0.82685
NHA-WT	ENSG00000025708	27	22:50964185-50964185	TE	0.82685
NHA-WT	ENSG00000025708	28	22:50964184-50964184	TE	0.82685
NHA-WT	ENSG00000025708	29	22:50964181-50964183	TE	0.82685
NHA-WT	ENSG00000025796	1	6:108279316-108279393	TS	1.2757
NHA-WT	ENSG00000025796	2	6:108279247-108279315	TS	1.2757
NHA-WT	ENSG00000025796	3	6:108279136-108279246	TS	1.2757
NHA-WT	ENSG00000025796	4	6:108279090-108279135	TS	1.2757
NHA-WT	ENSG00000025796	24	6:108222574-108222721	CE	0
NHA-WT	ENSG00000025796	25	6:108218853-108218935	CE	0
NHA-WT	ENSG00000025796	26	6:108215042-108215101	CE	0
NHA-WT	ENSG00000025796	33	6:108202353-108202454	CE	0
NHA-WT	ENSG00000025796	36	6:108197768-108197866	CE	0
NHA-WT	ENSG00000025796	39	6:108191969-108193051	TE	0
NHA-WT	ENSG00000025796	40	6:108188960-108191968	TE	0
NHA-WT	ENSG00000026025	1	10:17270258-17270513	TS	0
NHA-WT	ENSG00000026025	2	10:17270514-17270523	TS	0
NHA-WT	ENSG00000026025	6	10:17271277-17271289	TS	0
NHA-WT	ENSG00000026025	7	10:17271290-17271749	TE	0
NHA-WT	ENSG00000026025	7	10:17271290-17271749	TS	0
NHA-WT	ENSG00000026025	8	10:17271750-17271869	TE	0
NHA-WT	ENSG00000026025	9	10:17271870-17271949	TE	0
NHA-WT	ENSG00000026036	19	20:62318991-62319123	CE	0
NHA-WT	ENSG00000026036	20	20:62319124-62319289	RI	0
NHA-WT	ENSG00000026036	21	20:62319290-62319403	CE	0
NHA-WT	ENSG00000026036	28	20:62321103-62321218	CE	0
NHA-WT	ENSG00000026036	29	20:62321219-62321439	RI	0
NHA-WT	ENSG00000026036	30	20:62321440-62321563	CE	0
NHA-WT	ENSG00000026036	33	20:62323095-62323190	CE	0
NHA-WT	ENSG00000026036	34	20:62323191-62324157	RI	0
NHA-WT	ENSG00000026036	35	20:62324158-62324356	CE	0
NHA-WT	ENSG00000026036	40	20:62326681-62326833	CE	0
NHA-WT	ENSG00000026036	41	20:62326834-62327003	AD	0
NHA-WT	ENSG00000026036	42	20:62327131-62327207	CE	0
NHA-WT	ENSG00000026036	43	20:62327208-62328112	RI	0
NHA-WT	ENSG00000026036	44	20:62328113-62328544	CE	0
NHA-WT	ENSG00000026036	46	20:62329633-62330033	TE	0
NHA-WT	ENSG00000026036	47	20:62330034-62330037	TE	0
NHA-WT	ENSG00000026103	7	10:90750717-90750776	TS	0.36755
NHA-WT	ENSG00000026103	8	10:90750777-90750969	TS	0.36755
NHA-WT	ENSG00000026508	1	11:35160417-35160428	TS	0.08475
NHA-WT	ENSG00000026508	2	11:35160429-35160716	TS	0.08475
NHA-WT	ENSG00000026508	3	11:35160717-35160717	TS	0.08475
NHA-WT	ENSG00000026508	4	11:35160718-35160727	TS	0.08475
NHA-WT	ENSG00000026508	5	11:35160728-35160728	TS	0.08475
NHA-WT	ENSG00000026508	6	11:35160729-35160734	TS	0.08475
NHA-WT	ENSG00000026508	7	11:35160735-35160832	TS	0.08475
NHA-WT	ENSG00000026508	8	11:35160833-35160839	TS	0.08475
NHA-WT	ENSG00000026508	9	11:35160840-35160850	TS	0.08475
NHA-WT	ENSG00000026508	10	11:35160851-35160852	TS	0.08475
NHA-WT	ENSG00000026508	11	11:35160853-35160917	TS	0.08475
NHA-WT	ENSG00000026652	23	6:161557287-161557666	TE	0.294967
NHA-WT	ENSG00000026652	24	6:161551057-161557286	TE	0.294967
NHA-WT	ENSG00000026652	25	6:161551011-161551056	TE	0.294967
NHA-WT	ENSG00000027001	3	13:24462817-24463270	AD	0
NHA-WT	ENSG00000027075	62	14:62016403-62016520	TE	0.0516
NHA-WT	ENSG00000027075	63	14:62016521-62016664	TE	0.0516
NHA-WT	ENSG00000027075	64	14:62016665-62017690	TE	0.0516
NHA-WT	ENSG00000027075	65	14:62017691-62017694	TE	0.0516
NHA-WT	ENSG00000027847	20	5:177035540-177035623	CE	0
NHA-WT	ENSG00000027847	21	5:177035624-177035910	RI	0
NHA-WT	ENSG00000027847	23	5:177036541-177036708	TE	0.37055
NHA-WT	ENSG00000027847	24	5:177036709-177037267	TE	0.37055
NHA-WT	ENSG00000027847	25	5:177037268-177037329	TE	0.37055
NHA-WT	ENSG00000027847	26	5:177037330-177037348	TE	0.37055
NHA-WT	ENSG00000027869	17	1:156776036-156776365	TE	0.0082
NHA-WT	ENSG00000027869	18	1:156776035-156776035	TE	0.0082
NHA-WT	ENSG00000028116	33	2:58386484-58386919	TE	0.976067
NHA-WT	ENSG00000028116	34	2:58386920-58387002	TE	0.976067
NHA-WT	ENSG00000028116	35	2:58387003-58387006	TE	0.976067
NHA-WT	ENSG00000028116	36	2:58387007-58387055	TE	0.976067
NHA-WT	ENSG00000028277	48	19:42595382-42595743	TE	0.8635
NHA-WT	ENSG00000028277	49	19:42595312-42595381	TE	0.8635
NHA-WT	ENSG00000028277	50	19:42595301-42595311	TE	0.8635
NHA-WT	ENSG00000028277	51	19:42595238-42595300	TE	0.8635
NHA-WT	ENSG00000028277	52	19:42595232-42595237	TE	0.8635
NHA-WT	ENSG00000028277	53	19:42595230-42595231	TE	0.8635
NHA-WT	ENSG00000028277	54	19:42595182-42595229	TE	0.8635
NHA-WT	ENSG00000028277	55	19:42592675-42595181	TE	0.8635
NHA-WT	ENSG00000028277	56	19:42590263-42592674	TE	0.8635
NHA-WT	ENSG00000028839	1	6:134273308-134273423	TS	0
NHA-WT	ENSG00000028839	2	6:134273424-134273868	TS	0
NHA-WT	ENSG00000028839	16	6:134308099-134308637	TE	0
NHA-WT	ENSG00000028839	17	6:134308638-134311570	TE	0
NHA-WT	ENSG00000029364	1	14:69864732-69865102	TS	0.0356
NHA-WT	ENSG00000029364	2	14:69865103-69865106	TS	0.0356
NHA-WT	ENSG00000029364	3	14:69865107-69865167	TS	0.0356
NHA-WT	ENSG00000029364	4	14:69865168-69865320	AD	0
NHA-WT	ENSG00000029725	28	17:5281472-5281527	CE	0
NHA-WT	ENSG00000029725	31	17:5284684-5284800	CE	0
NHA-WT	ENSG00000029725	33	17:5286417-5286518	TE	0
NHA-WT	ENSG00000029725	34	17:5286519-5286720	TE	0
NHA-WT	ENSG00000029725	36	17:5286913-5286949	RI	0
NHA-WT	ENSG00000029725	37	17:5286950-5288057	TE	0
NHA-WT	ENSG00000029725	38	17:5288058-5289129	TE	0
NHA-WT	ENSG00000029993	10	X:150156250-150156350	TE	0
NHA-WT	ENSG00000029993	11	X:150156351-150156365	TE	0
NHA-WT	ENSG00000029993	12	X:150156366-150156405	TE	0
NHA-WT	ENSG00000029993	13	X:150156406-150159248	TE	0
NHA-WT	ENSG00000030304	13	9:113530093-113530099	AA	0
NHA-WT	ENSG00000030304	16	9:113538068-113538243	CE	0
NHA-WT	ENSG00000030304	20	9:113549970-113550118	CE	0
NHA-WT	ENSG00000030304	22	9:113562586-113563278	TE	0.324867
NHA-WT	ENSG00000030304	23	9:113563279-113563859	TE	0.324867
NHA-WT	ENSG00000032742	1	13:21140585-21141207	TS	0
NHA-WT	ENSG00000032742	2	13:21141208-21141276	TS	0
NHA-WT	ENSG00000032742	3	13:21141277-21141290	TS	0
NHA-WT	ENSG00000032742	4	13:21141291-21141304	TS	0
NHA-WT	ENSG00000032742	5	13:21141305-21141395	TS	0
NHA-WT	ENSG00000033011	1	16:5083703-5083960	TS	0
NHA-WT	ENSG00000033011	2	16:5083961-5084062	TS	0
NHA-WT	ENSG00000033011	28	16:5133683-5133758	CE	0
NHA-WT	ENSG00000033011	29	16:5134751-5135019	TE	0
NHA-WT	ENSG00000033011	30	16:5135020-5135058	TE	0
NHA-WT	ENSG00000033011	32	16:5135072-5135391	TE	0.596767
NHA-WT	ENSG00000033011	33	16:5135392-5135395	TE	0.596767
NHA-WT	ENSG00000033100	3	7:150929901-150931171	RI	0
NHA-WT	ENSG00000033100	10	7:150934460-150934679	TE	0.52825
NHA-WT	ENSG00000033100	11	7:150934680-150935905	TE	0.52825
NHA-WT	ENSG00000033100	12	7:150935906-150935908	TE	0.52825
NHA-WT	ENSG00000033170	1	14:65877310-65877839	TS	0.884367
NHA-WT	ENSG00000033170	2	14:65877840-65878580	TS	0.884367
NHA-WT	ENSG00000033170	3	14:65878581-65878582	TS	0.884367
NHA-WT	ENSG00000033170	4	14:65878583-65878591	TS	0.884367
NHA-WT	ENSG00000033170	5	14:65878592-65878608	TS	0.884367
NHA-WT	ENSG00000033170	6	14:65878609-65878653	TS	0.884367
NHA-WT	ENSG00000033170	7	14:65878654-65878711	TS	0.884367
NHA-WT	ENSG00000033170	8	14:65879535-65879723	TS	0.8249
NHA-WT	ENSG00000033170	9	14:65879724-65879725	TS	0.8249
NHA-WT	ENSG00000033170	10	14:65879726-65879736	TS	0.8249
NHA-WT	ENSG00000033170	11	14:65879737-65879739	TS	0.8249
NHA-WT	ENSG00000033170	12	14:65879740-65879786	TS	0.8249
NHA-WT	ENSG00000033170	13	14:65879787-65879932	TS	0.8249
NHA-WT	ENSG00000033627	62	17:40669945-40672352	TS	0
NHA-WT	ENSG00000033627	63	17:40672353-40672400	TS	0
NHA-WT	ENSG00000033627	64	17:40672401-40672641	TS	0
NHA-WT	ENSG00000033867	8	3:27478879-27479017	CE	0
NHA-WT	ENSG00000033867	39	3:27418255-27418336	TE	0
NHA-WT	ENSG00000033867	40	3:27418220-27418254	TE	0
NHA-WT	ENSG00000033867	41	3:27418097-27418219	TE	0
NHA-WT	ENSG00000033867	42	3:27414214-27418096	TE	0
NHA-WT	ENSG00000034533	9	3:130745032-130745350	AD	0
NHA-WT	ENSG00000034533	20	3:130737540-130737560	AA	0
NHA-WT	ENSG00000034533	27	3:130732826-130733231	TE	0
NHA-WT	ENSG00000034533	28	3:130732719-130732825	TE	0
NHA-WT	ENSG00000034677	39	8:101271392-101271474	TE	1.01703
NHA-WT	ENSG00000034677	40	8:101271291-101271391	TE	1.01703
NHA-WT	ENSG00000034677	41	8:101271113-101271290	TE	1.01703
NHA-WT	ENSG00000034677	42	8:101269570-101271112	TE	1.01703
NHA-WT	ENSG00000034677	43	8:101269288-101269569	TE	1.01703
NHA-WT	ENSG00000034693	15	6:143810280-143810510	TE	0
NHA-WT	ENSG00000034693	16	6:143810511-143811147	TE	0
NHA-WT	ENSG00000034713	9	16:75611177-75611428	TE	0.588667
NHA-WT	ENSG00000034713	10	16:75611429-75611779	TE	0.588667
NHA-WT	ENSG00000035141	12	2:70524558-70524609	TE	0.95935
NHA-WT	ENSG00000035141	13	2:70524308-70524557	TE	0.95935
NHA-WT	ENSG00000035141	14	2:70524143-70524307	TE	0.95935
NHA-WT	ENSG00000035141	15	2:70523108-70524142	TE	0.95935
NHA-WT	ENSG00000035141	16	2:70523107-70523107	TE	0.95935
NHA-WT	ENSG00000035403	18	10:75860706-75860811	AA	0
NHA-WT	ENSG00000035403	31	10:75877781-75878237	TE	0.3404
NHA-WT	ENSG00000035403	32	10:75878238-75879910	TE	0.3404
NHA-WT	ENSG00000035403	33	10:75879911-75879918	TE	0.3404
NHA-WT	ENSG00000035681	5	8:59571774-59572093	TS	0
NHA-WT	ENSG00000035681	6	8:59571754-59571773	TS	0
NHA-WT	ENSG00000035681	63	8:59498457-59498559	CE	0
NHA-WT	ENSG00000035681	64	8:59498321-59498456	RI	0
NHA-WT	ENSG00000035681	66	8:59496368-59496759	TE	0.750367
NHA-WT	ENSG00000035681	67	8:59496329-59496367	TE	0.750367
NHA-WT	ENSG00000035681	68	8:59496063-59496328	TE	0.750367
NHA-WT	ENSG00000035862	7	17:76869901-76870001	CE	0
NHA-WT	ENSG00000035862	11	17:76851624-76851946	TE	0.4834
NHA-WT	ENSG00000035862	12	17:76849063-76851623	TE	0.4834
NHA-WT	ENSG00000035862	13	17:76849059-76849062	TE	0.4834
NHA-WT	ENSG00000036672	14	11:119229845-119229940	RI	0
NHA-WT	ENSG00000036672	15	11:119229734-119229844	CE	0
NHA-WT	ENSG00000037042	16	17:40818621-40818840	TE	0.2524
NHA-WT	ENSG00000037042	17	17:40818841-40819024	TE	0.2524
NHA-WT	ENSG00000037897	1	12:58165903-58166576	TS	0
NHA-WT	ENSG00000037897	2	12:58165900-58165902	TS	0
NHA-WT	ENSG00000037897	3	12:58165898-58165899	TS	0
NHA-WT	ENSG00000037897	4	12:58165885-58165897	TS	0
NHA-WT	ENSG00000037897	5	12:58165860-58165884	TS	0
NHA-WT	ENSG00000037897	6	12:58165757-58165859	TS	0
NHA-WT	ENSG00000039123	41	5:54720548-54720813	TE	0
NHA-WT	ENSG00000039123	42	5:54720814-54720934	TE	0
NHA-WT	ENSG00000039123	43	5:54720935-54721409	TE	0
NHA-WT	ENSG00000039319	43	5:79773038-79773130	TE	0.3739
NHA-WT	ENSG00000039319	44	5:79773131-79774937	TE	0.3739
NHA-WT	ENSG00000039319	45	5:79774938-79774954	TE	0.3739
NHA-WT	ENSG00000039319	46	5:79774955-79774959	TE	0.3739
NHA-WT	ENSG00000039319	47	5:79774960-79774972	TE	0.3739
NHA-WT	ENSG00000039319	48	5:79774973-79775169	TE	0.3739
NHA-WT	ENSG00000039523	9	16:67563630-67563693	TS	0
NHA-WT	ENSG00000039523	10	16:67563694-67563762	TS	0
NHA-WT	ENSG00000039523	11	16:67563763-67563990	AD	0
NHA-WT	ENSG00000039523	46	16:67575770-67576568	TE	0.0142
NHA-WT	ENSG00000039523	47	16:67576569-67576571	TE	0.0142
NHA-WT	ENSG00000039523	51	16:67577254-67577372	CE	0
NHA-WT	ENSG00000039523	67	16:67580269-67580540	TE	0.2062
NHA-WT	ENSG00000039523	68	16:67580541-67580689	TE	0.2062
NHA-WT	ENSG00000039523	69	16:67580690-67580691	TE	0.2062
NHA-WT	ENSG00000039650	42	19:50364623-50364705	RI	0
NHA-WT	ENSG00000040531	1	17:3539762-3539772	TS	0
NHA-WT	ENSG00000040531	2	17:3539773-3540002	TS	0
NHA-WT	ENSG00000040531	16	17:3550738-3550816	CE	0
NHA-WT	ENSG00000040531	24	17:3559781-3559807	TE	0
NHA-WT	ENSG00000040531	25	17:3559808-3559820	TE	0
NHA-WT	ENSG00000040531	26	17:3559821-3559845	TE	0
NHA-WT	ENSG00000040531	31	17:3563530-3563644	CE	0
NHA-WT	ENSG00000040531	32	17:3563645-3563910	RI	0
NHA-WT	ENSG00000040531	33	17:3563911-3563980	TE	0.0158
NHA-WT	ENSG00000040531	34	17:3563981-3564331	TE	0.0158
NHA-WT	ENSG00000040531	35	17:3564332-3564832	TE	0.0158
NHA-WT	ENSG00000040531	36	17:3564833-3564836	TE	0.0158
NHA-WT	ENSG00000040933	44	2:99203939-99204036	TE	0.0257667
NHA-WT	ENSG00000040933	45	2:99204037-99204071	TE	0.0257667
NHA-WT	ENSG00000040933	46	2:99204072-99204124	TE	0.0257667
NHA-WT	ENSG00000040933	47	2:99204125-99204322	TE	0.0257667
NHA-WT	ENSG00000040933	48	2:99204323-99207496	TE	0.0257667
NHA-WT	ENSG00000040933	49	2:99207497-99210853	TE	0.0257667
NHA-WT	ENSG00000041353	3	18:52495430-52495711	TS	0.4785
NHA-WT	ENSG00000041353	4	18:52495712-52495931	TS	0.4785
NHA-WT	ENSG00000041802	30	3:194362902-194362976	TE	0
NHA-WT	ENSG00000041802	31	3:194362842-194362901	TE	0
NHA-WT	ENSG00000041802	32	3:194361517-194362841	TE	0
NHA-WT	ENSG00000042062	22	20:49211252-49211334	AA	0
NHA-WT	ENSG00000042062	31	20:49203337-49203869	TE	0.2451
NHA-WT	ENSG00000042062	32	20:49203202-49203336	TE	0.2451
NHA-WT	ENSG00000042062	33	20:49202649-49203201	TE	0.2451
NHA-WT	ENSG00000042062	34	20:49202645-49202648	TE	0.2451
NHA-WT	ENSG00000042429	1	11:93517393-93517447	TS	0.316533
NHA-WT	ENSG00000042429	2	11:93517448-93517527	TS	0.316533
NHA-WT	ENSG00000042429	3	11:93517528-93517576	TS	0.316533
NHA-WT	ENSG00000042429	4	11:93517577-93517929	TS	0.316533
NHA-WT	ENSG00000042445	27	2:85570234-85570504	TE	1.0623
NHA-WT	ENSG00000042445	28	2:85570094-85570233	TE	1.0623
NHA-WT	ENSG00000042445	29	2:85569805-85570093	TE	1.0623
NHA-WT	ENSG00000042445	30	2:85569222-85569804	TE	1.0623
NHA-WT	ENSG00000042445	31	2:85569211-85569221	TE	1.0623
NHA-WT	ENSG00000043093	19	3:182665338-182665420	CE	0
NHA-WT	ENSG00000043093	21	3:182662892-182662961	TE	0.437333
NHA-WT	ENSG00000043093	22	3:182662822-182662891	TE	0.437333
NHA-WT	ENSG00000043093	23	3:182655862-182662821	TE	0.437333
NHA-WT	ENSG00000044090	30	6:43005358-43005749	TE	0
NHA-WT	ENSG00000044090	31	6:43005355-43005357	TE	0
NHA-WT	ENSG00000044115	104	5:138269491-138269851	TE	1.06373
NHA-WT	ENSG00000044115	105	5:138269852-138269902	TE	1.06373
NHA-WT	ENSG00000044115	106	5:138269903-138270520	TE	1.06373
NHA-WT	ENSG00000044115	107	5:138270521-138270717	TE	1.06373
NHA-WT	ENSG00000044115	108	5:138270718-138270722	TE	1.06373
NHA-WT	ENSG00000044115	109	5:138270723-138270723	TE	1.06373
NHA-WT	ENSG00000046651	11	X:13756965-13757033	CE	0
NHA-WT	ENSG00000046651	12	X:13757121-13757151	CE	0
NHA-WT	ENSG00000046651	14	X:13758208-13758332	CE	0
NHA-WT	ENSG00000046651	15	X:13762534-13762638	CE	0
NHA-WT	ENSG00000046651	16	X:13764438-13764574	CE	0
NHA-WT	ENSG00000046651	17	X:13764899-13765072	CE	0
NHA-WT	ENSG00000046651	18	X:13767546-13767652	CE	0
NHA-WT	ENSG00000046651	23	X:13773270-13773361	CE	0
NHA-WT	ENSG00000046651	24	X:13774697-13774886	CE	0
NHA-WT	ENSG00000046651	32	X:13785246-13785403	CE	0
NHA-WT	ENSG00000046653	24	X:13792456-13792743	TE	0.893267
NHA-WT	ENSG00000046653	25	X:13792073-13792455	TE	0.893267
NHA-WT	ENSG00000046653	27	X:13790973-13791149	TE	0.950867
NHA-WT	ENSG00000046653	28	X:13790818-13790972	TE	0.950867
NHA-WT	ENSG00000046653	29	X:13789575-13790817	TE	0.950867
NHA-WT	ENSG00000046653	30	X:13789150-13789574	TE	0.950867
NHA-WT	ENSG00000047249	1	8:54755854-54756118	TS	0.3271
NHA-WT	ENSG00000047249	2	8:54755823-54755853	TS	0.3271
NHA-WT	ENSG00000047249	3	8:54755820-54755822	TS	0.3271
NHA-WT	ENSG00000047249	4	8:54755806-54755819	TS	0.3271
NHA-WT	ENSG00000047249	5	8:54755603-54755805	TS	0.3271
NHA-WT	ENSG00000047249	6	8:54755594-54755602	TS	0.3271
NHA-WT	ENSG00000047315	42	4:57889747-57889827	RI	0
NHA-WT	ENSG00000047315	43	4:57889828-57889917	CE	0
NHA-WT	ENSG00000047315	49	4:57897065-57897173	TE	0.2844
NHA-WT	ENSG00000047315	50	4:57897174-57897324	TE	0.2844
NHA-WT	ENSG00000047315	51	4:57897325-57897334	TE	0.2844
NHA-WT	ENSG00000047410	30	1:186319355-186319520	CE	0
NHA-WT	ENSG00000047457	31	3:148897526-148897920	TS	0
NHA-WT	ENSG00000047457	32	3:148897450-148897525	TS	0
NHA-WT	ENSG00000047457	42	3:148894037-148894138	CE	0
NHA-WT	ENSG00000047457	43	3:148894025-148894036	AD	0
NHA-WT	ENSG00000047457	45	3:148891271-148891517	TE	0
NHA-WT	ENSG00000047457	46	3:148891254-148891270	TE	0
NHA-WT	ENSG00000047457	47	3:148890286-148891253	TE	0
NHA-WT	ENSG00000047457	49	3:148880204-148880662	TE	0.7722
NHA-WT	ENSG00000047457	50	3:148880197-148880203	TE	0.7722
NHA-WT	ENSG00000047579	26	6:15524343-15524756	TE	0.8228
NHA-WT	ENSG00000047579	27	6:15524216-15524342	TE	0.8228
NHA-WT	ENSG00000047579	28	6:15523794-15524215	TE	0.8228
NHA-WT	ENSG00000047579	29	6:15523286-15523450	TE	0
NHA-WT	ENSG00000047579	30	6:15523074-15523285	TE	0
NHA-WT	ENSG00000047579	31	6:15523068-15523073	TE	0
NHA-WT	ENSG00000047579	32	6:15523041-15523067	TE	0
NHA-WT	ENSG00000047579	33	6:15523038-15523040	TE	0
NHA-WT	ENSG00000047579	34	6:15523032-15523037	TE	0
NHA-WT	ENSG00000047648	1	X:11683204-11683821	TS	0
NHA-WT	ENSG00000047648	2	X:11682949-11683203	TS	0
NHA-WT	ENSG00000047648	3	X:11682361-11682948	TS	0
NHA-WT	ENSG00000047648	30	X:11155667-11157650	TE	0.6078
NHA-WT	ENSG00000047648	31	X:11155664-11155666	TE	0.6078
NHA-WT	ENSG00000047648	32	X:11155663-11155663	TE	0.6078
NHA-WT	ENSG00000047849	52	3:47894110-47894428	TE	1.10437
NHA-WT	ENSG00000047849	53	3:47893635-47894109	TE	1.10437
NHA-WT	ENSG00000047849	54	3:47893358-47893634	TE	1.10437
NHA-WT	ENSG00000047849	55	3:47892584-47893357	TE	1.10437
NHA-WT	ENSG00000047849	56	3:47892186-47892583	TE	1.10437
NHA-WT	ENSG00000047849	57	3:47892185-47892185	TE	1.10437
NHA-WT	ENSG00000047849	58	3:47892182-47892184	TE	1.10437
NHA-WT	ENSG00000048052	57	7:18706100-18706523	TE	0
NHA-WT	ENSG00000048052	58	7:18706524-18706546	TE	0
NHA-WT	ENSG00000048052	59	7:18706547-18706602	TE	0
NHA-WT	ENSG00000048052	60	7:18706603-18706728	TE	0
NHA-WT	ENSG00000048052	61	7:18706729-18708466	TE	0
NHA-WT	ENSG00000048052	82	7:19035646-19035685	TE	1.4558
NHA-WT	ENSG00000048052	83	7:19035686-19035820	TE	1.4558
NHA-WT	ENSG00000048052	84	7:19035821-19035966	TE	1.4558
NHA-WT	ENSG00000048052	85	7:19035967-19036922	TE	1.4558
NHA-WT	ENSG00000048052	86	7:19036923-19042039	TE	1.4558
NHA-WT	ENSG00000048162	1	5:175815764-175815976	TS	0
NHA-WT	ENSG00000048162	2	5:175815600-175815763	TS	0
NHA-WT	ENSG00000048162	3	5:175815589-175815599	TS	0
NHA-WT	ENSG00000048162	4	5:175815577-175815588	TS	0
NHA-WT	ENSG00000048162	5	5:175815573-175815576	TS	0
NHA-WT	ENSG00000048162	6	5:175815570-175815572	TS	0
NHA-WT	ENSG00000048162	7	5:175815434-175815569	TS	0
NHA-WT	ENSG00000048162	8	5:175815345-175815433	RI	0
NHA-WT	ENSG00000048162	20	5:175811285-175811287	AA	0
NHA-WT	ENSG00000048342	18	4:15482821-15482914	TE	0.07
NHA-WT	ENSG00000048342	19	4:15482915-15483000	TE	0.07
NHA-WT	ENSG00000048342	20	4:15483001-15483883	TE	0.07
NHA-WT	ENSG00000048342	21	4:15483884-15483886	TE	0.07
NHA-WT	ENSG00000048342	22	4:15483887-15483941	TE	0.07
NHA-WT	ENSG00000048342	42	4:15552447-15552603	CE	0
NHA-WT	ENSG00000048342	61	4:15597708-15597766	AA	0
NHA-WT	ENSG00000048342	62	4:15597767-15597830	CE	0
NHA-WT	ENSG00000048342	65	4:15602860-15602994	TE	0.5755
NHA-WT	ENSG00000048342	66	4:15602995-15603169	TE	0.5755
NHA-WT	ENSG00000048342	67	4:15603170-15603175	TE	0.5755
NHA-WT	ENSG00000048342	68	4:15603176-15603180	TE	0.5755
NHA-WT	ENSG00000048540	61	12:16704252-16704261	TE	1.04437
NHA-WT	ENSG00000048540	62	12:16704238-16704251	TE	1.04437
NHA-WT	ENSG00000048540	63	12:16704166-16704237	TE	1.04437
NHA-WT	ENSG00000048540	64	12:16704162-16704165	TE	1.04437
NHA-WT	ENSG00000048540	65	12:16704116-16704161	TE	1.04437
NHA-WT	ENSG00000048540	66	12:16703979-16704115	TE	1.04437
NHA-WT	ENSG00000048540	67	12:16703902-16703978	TE	1.04437
NHA-WT	ENSG00000048540	68	12:16703809-16703901	TE	1.04437
NHA-WT	ENSG00000048540	69	12:16703758-16703808	TE	1.04437
NHA-WT	ENSG00000048540	70	12:16703744-16703757	TE	1.04437
NHA-WT	ENSG00000048540	71	12:16703383-16703743	TE	1.04437
NHA-WT	ENSG00000048540	72	12:16703317-16703382	TE	1.04437
NHA-WT	ENSG00000048540	73	12:16703136-16703316	TE	1.04437
NHA-WT	ENSG00000048540	74	12:16703133-16703135	TE	1.04437
NHA-WT	ENSG00000048540	75	12:16702309-16703132	TE	1.04437
NHA-WT	ENSG00000048540	76	12:16701359-16702308	TE	1.04437
NHA-WT	ENSG00000048540	77	12:16701358-16701358	TE	1.04437
NHA-WT	ENSG00000048540	78	12:16701355-16701357	TE	1.04437
NHA-WT	ENSG00000048540	79	12:16701354-16701354	TE	1.04437
NHA-WT	ENSG00000048540	80	12:16701307-16701353	TE	1.04437
NHA-WT	ENSG00000048544	6	6:42176596-42176685	CE	0
NHA-WT	ENSG00000048649	1	11:77531916-77532063	TS	0.7657
NHA-WT	ENSG00000048649	2	11:77531881-77531915	TS	0.7657
NHA-WT	ENSG00000048649	3	11:77531758-77531880	TS	0.7657
NHA-WT	ENSG00000048649	4	11:77531753-77531757	TS	0.7657
NHA-WT	ENSG00000048649	5	11:77531746-77531752	TS	0.7657
NHA-WT	ENSG00000048649	6	11:77531574-77531745	TS	0.7657
NHA-WT	ENSG00000048828	1	9:96214004-96214172	TS	0
NHA-WT	ENSG00000048828	2	9:96214173-96214665	TS	0
NHA-WT	ENSG00000048828	3	9:96214666-96214671	TS	0
NHA-WT	ENSG00000048828	27	9:96326511-96327047	TE	0.0124
NHA-WT	ENSG00000048828	28	9:96327048-96328389	TE	0.0124
NHA-WT	ENSG00000048828	29	9:96328390-96328397	TE	0.0124
NHA-WT	ENSG00000048991	28	2:136393460-136393568	CE	0
NHA-WT	ENSG00000048991	29	2:136393658-136393753	CE	0
NHA-WT	ENSG00000049449	10	11:32113156-32113346	AF	0
NHA-WT	ENSG00000049449	12	11:32118690-32118883	CE	0
NHA-WT	ENSG00000049449	25	11:32125932-32126148	TE	0
NHA-WT	ENSG00000049449	26	11:32126149-32126211	TE	0
NHA-WT	ENSG00000049449	27	11:32126212-32126230	TE	0
NHA-WT	ENSG00000049449	29	11:32126235-32126832	RI	0
NHA-WT	ENSG00000049449	30	11:32126833-32127077	TE	0.0001
NHA-WT	ENSG00000049449	31	11:32127078-32127078	TE	0.0001
NHA-WT	ENSG00000049449	32	11:32127079-32127082	TE	0.0001
NHA-WT	ENSG00000049449	33	11:32127083-32127301	TE	0.0001
NHA-WT	ENSG00000049540	72	7:73474832-73474930	AD	0
NHA-WT	ENSG00000049618	1	6:157099063-157099063	TS	0.817333
NHA-WT	ENSG00000049618	2	6:157099064-157099085	TS	0.817333
NHA-WT	ENSG00000049618	3	6:157099086-157100566	TS	0.817333
NHA-WT	ENSG00000049618	4	6:157100567-157100605	TS	0.817333
NHA-WT	ENSG00000049768	15	X:49107945-49108124	RI	0
NHA-WT	ENSG00000049768	16	X:49107795-49107944	TE	0.0215
NHA-WT	ENSG00000049768	17	X:49106900-49107794	TE	0.0215
NHA-WT	ENSG00000049768	18	X:49106897-49106899	TE	0.0215
NHA-WT	ENSG00000049860	35	5:74018124-74018293	AA	0
NHA-WT	ENSG00000050165	43	11:11985978-11986016	TE	0.0292667
NHA-WT	ENSG00000050165	44	11:11985938-11985977	TE	0.0292667
NHA-WT	ENSG00000050165	45	11:11984653-11985937	TE	0.0292667
NHA-WT	ENSG00000050344	4	7:26223321-26223404	CE	0
NHA-WT	ENSG00000050344	7	7:26224153-26225937	TE	0.3607
NHA-WT	ENSG00000050344	8	7:26225938-26226745	TE	0.3607
NHA-WT	ENSG00000050393	1	6:13814790-13814800	TS	0
NHA-WT	ENSG00000050393	2	6:13814247-13814789	TS	0
NHA-WT	ENSG00000050405	37	12:50571557-50571852	TE	1.37637
NHA-WT	ENSG00000050405	38	12:50571481-50571556	TE	1.37637
NHA-WT	ENSG00000050405	39	12:50570789-50571480	TE	1.37637
NHA-WT	ENSG00000050405	40	12:50570668-50570788	TE	1.37637
NHA-WT	ENSG00000050405	41	12:50569573-50570667	TE	1.37637
NHA-WT	ENSG00000050405	42	12:50569571-50569572	TE	1.37637
NHA-WT	ENSG00000050426	63	12:51453144-51453195	TE	0.849067
NHA-WT	ENSG00000050426	64	12:51453196-51453315	TE	0.849067
NHA-WT	ENSG00000050426	65	12:51453316-51453317	TE	0.849067
NHA-WT	ENSG00000050426	66	12:51453318-51453432	TE	0.849067
NHA-WT	ENSG00000050426	67	12:51453433-51453442	TE	0.849067
NHA-WT	ENSG00000050426	68	12:51453443-51453485	TE	0.849067
NHA-WT	ENSG00000050426	69	12:51453486-51453500	TE	0.849067
NHA-WT	ENSG00000050426	70	12:51453501-51453588	TE	0.849067
NHA-WT	ENSG00000050426	71	12:51453589-51453610	TE	0.849067
NHA-WT	ENSG00000050426	72	12:51453611-51453650	TE	0.849067
NHA-WT	ENSG00000050426	73	12:51453651-51454086	TE	0.849067
NHA-WT	ENSG00000050426	74	12:51454087-51454146	TE	0.849067
NHA-WT	ENSG00000050426	75	12:51454147-51454152	TE	0.849067
NHA-WT	ENSG00000050426	76	12:51454153-51454184	TE	0.849067
NHA-WT	ENSG00000050426	77	12:51454185-51454192	TE	0.849067
NHA-WT	ENSG00000050426	78	12:51454193-51454196	TE	0.849067
NHA-WT	ENSG00000050426	79	12:51454197-51454201	TE	0.849067
NHA-WT	ENSG00000050426	80	12:51454202-51454204	TE	0.849067
NHA-WT	ENSG00000050426	81	12:51454205-51454207	TE	0.849067
NHA-WT	ENSG00000051180	23	15:41023253-41023557	TE	0.351167
NHA-WT	ENSG00000051180	24	15:41023558-41023614	TE	0.351167
NHA-WT	ENSG00000051180	25	15:41023615-41023755	TE	0.351167
NHA-WT	ENSG00000051180	26	15:41023756-41023788	TE	0.351167
NHA-WT	ENSG00000051180	27	15:41023789-41023790	TE	0.351167
NHA-WT	ENSG00000051180	28	15:41023791-41023791	TE	0.351167
NHA-WT	ENSG00000051180	29	15:41023792-41024354	TE	0.351167
NHA-WT	ENSG00000051620	8	6:138734017-138734291	TE	0
NHA-WT	ENSG00000051620	9	6:138734292-138734310	TE	0
NHA-WT	ENSG00000051620	10	6:138734311-138743334	TE	0
NHA-WT	ENSG00000051825	1	12:123728500-123728561	TS	0
NHA-WT	ENSG00000051825	2	12:123728400-123728499	TS	0
NHA-WT	ENSG00000051825	3	12:123728369-123728399	AD	0
NHA-WT	ENSG00000052344	16	16:31143215-31143656	TE	0.507467
NHA-WT	ENSG00000052344	17	16:31142756-31143214	TE	0.507467
NHA-WT	ENSG00000052723	22	1:115316966-115316993	TE	0.4299
NHA-WT	ENSG00000052723	23	1:115316763-115316965	TE	0.4299
NHA-WT	ENSG00000052723	24	1:115315396-115316762	TE	0.4299
NHA-WT	ENSG00000052723	25	1:115312100-115315395	TE	0.4299
NHA-WT	ENSG00000053254	39	14:89629222-89629313	TE	0.4153
NHA-WT	ENSG00000053254	40	14:89628706-89629221	TE	0.4153
NHA-WT	ENSG00000053254	41	14:89627729-89628705	TE	0.4153
NHA-WT	ENSG00000053254	42	14:89622529-89627728	TE	0.4153
NHA-WT	ENSG00000053254	43	14:89622516-89622528	TE	0.4153
NHA-WT	ENSG00000053372	12	1:19585175-19585233	TE	0
NHA-WT	ENSG00000053372	13	1:19585234-19586622	TE	0
NHA-WT	ENSG00000053438	1	20:36149617-36149620	TS	0
NHA-WT	ENSG00000053438	2	20:36149621-36149805	TS	0
NHA-WT	ENSG00000053524	23	3:183017557-183017792	TE	0.291733
NHA-WT	ENSG00000053524	24	3:183016215-183017556	TE	0.291733
NHA-WT	ENSG00000053702	4	12:2944008-2944114	AA	0
NHA-WT	ENSG00000053702	5	12:2943808-2944007	CE	0
NHA-WT	ENSG00000054148	9	9:139744465-139744589	CE	0
NHA-WT	ENSG00000054148	10	9:139744590-139744954	RI	0
NHA-WT	ENSG00000054148	13	9:139745207-139745474	TE	0
NHA-WT	ENSG00000054148	14	9:139745475-139745476	TE	0
NHA-WT	ENSG00000054148	15	9:139745477-139745479	TE	0
NHA-WT	ENSG00000054148	16	9:139745480-139745488	TE	0
NHA-WT	ENSG00000054179	12	9:139943459-139943527	AA	0
NHA-WT	ENSG00000054277	2	1:241803664-241803701	TS	0.42585
NHA-WT	ENSG00000054277	3	1:241803658-241803663	TS	0.42585
NHA-WT	ENSG00000054277	4	1:241803643-241803657	TS	0.42585
NHA-WT	ENSG00000054277	5	1:241803513-241803642	TS	0.42585
NHA-WT	ENSG00000054277	6	1:241803184-241803512	TS	0.42585
NHA-WT	ENSG00000054282	40	1:243663058-243663388	TE	0.0092
NHA-WT	ENSG00000054282	41	1:243663389-243663391	TE	0.0092
NHA-WT	ENSG00000054282	42	1:243663392-243663392	TE	0.0092
NHA-WT	ENSG00000054282	43	1:243663393-243663393	TE	0.0092
NHA-WT	ENSG00000054282	44	1:243663394-243663394	TE	0.0092
NHA-WT	ENSG00000054523	66	1:10438397-10441655	TE	0.201467
NHA-WT	ENSG00000054523	67	1:10441656-10441661	TE	0.201467
NHA-WT	ENSG00000054690	64	14:68055511-68055948	TE	0.4873
NHA-WT	ENSG00000054690	65	14:68055949-68056157	TE	0.4873
NHA-WT	ENSG00000054690	66	14:68056158-68056250	TE	0.4873
NHA-WT	ENSG00000054690	67	14:68056251-68056328	TE	0.4873
NHA-WT	ENSG00000054690	68	14:68056329-68056329	TE	0.4873
NHA-WT	ENSG00000054965	12	11:73117028-73117789	TE	0.3614
NHA-WT	ENSG00000054965	13	11:73111532-73117027	TE	0.3614
NHA-WT	ENSG00000054967	26	11:73106489-73107685	TE	0.944067
NHA-WT	ENSG00000054967	27	11:73107686-73107689	TE	0.944067
NHA-WT	ENSG00000054967	28	11:73107690-73108517	TE	0.944067
NHA-WT	ENSG00000054967	29	11:73108518-73108519	TE	0.944067
NHA-WT	ENSG00000055163	87	5:156819841-156820215	TE	0.830567
NHA-WT	ENSG00000055163	88	5:156820216-156820231	TE	0.830567
NHA-WT	ENSG00000055163	89	5:156820232-156820232	TE	0.830567
NHA-WT	ENSG00000055163	90	5:156820233-156820237	TE	0.830567
NHA-WT	ENSG00000055163	91	5:156820238-156820241	TE	0.830567
NHA-WT	ENSG00000055163	92	5:156820242-156822603	TE	0.830567
NHA-WT	ENSG00000055163	93	5:156822604-156822606	TE	0.830567
NHA-WT	ENSG00000055332	4	2:37376167-37376400	AA	0
NHA-WT	ENSG00000055332	5	2:37376083-37376166	AA	0
NHA-WT	ENSG00000055332	28	2:37334489-37334538	TE	0.00846667
NHA-WT	ENSG00000055332	29	2:37334416-37334488	TE	0.00846667
NHA-WT	ENSG00000055332	30	2:37333699-37334415	TE	0.00846667
NHA-WT	ENSG00000055332	31	2:37326353-37333698	TE	0.00846667
NHA-WT	ENSG00000055609	85	7:151833669-151834009	TE	0.580933
NHA-WT	ENSG00000055609	86	7:151832618-151833668	TE	0.580933
NHA-WT	ENSG00000055609	87	7:151832014-151832617	TE	0.580933
NHA-WT	ENSG00000055609	88	7:151832010-151832013	TE	0.580933
NHA-WT	ENSG00000056097	29	5:32355754-32356045	TE	0.8313
NHA-WT	ENSG00000056097	30	5:32354958-32355753	TE	0.8313
NHA-WT	ENSG00000056097	31	5:32354735-32354957	TE	0.8313
NHA-WT	ENSG00000056097	32	5:32354457-32354734	TE	0.8313
NHA-WT	ENSG00000056097	33	5:32354456-32354456	TE	0.8313
NHA-WT	ENSG00000056586	40	9:125612078-125612101	TE	0
NHA-WT	ENSG00000056586	41	9:125611732-125612077	TE	0
NHA-WT	ENSG00000056586	42	9:125611716-125611731	TE	0
NHA-WT	ENSG00000056586	43	9:125609834-125611715	TE	0
NHA-WT	ENSG00000056586	44	9:125606835-125609833	TE	0
NHA-WT	ENSG00000056661	20	17:36891365-36891744	TE	0
NHA-WT	ENSG00000056661	21	17:36891362-36891364	TE	0
NHA-WT	ENSG00000056661	22	17:36891297-36891361	TE	0
NHA-WT	ENSG00000056661	23	17:36890533-36891296	TE	0
NHA-WT	ENSG00000056661	25	17:36890153-36890506	TE	0.0166
NHA-WT	ENSG00000056661	26	17:36890151-36890152	TE	0.0166
NHA-WT	ENSG00000056661	27	17:36890150-36890150	TE	0.0166
NHA-WT	ENSG00000056736	14	3:53898773-53898918	TE	0.764933
NHA-WT	ENSG00000056736	15	3:53898919-53899615	TE	0.764933
NHA-WT	ENSG00000056736	16	3:53899616-53899827	TE	0.764933
NHA-WT	ENSG00000056972	13	6:111894098-111894186	CE	0
NHA-WT	ENSG00000056972	23	6:111888253-111888314	AD	0
NHA-WT	ENSG00000056972	24	6:111888201-111888252	AD	0
NHA-WT	ENSG00000056972	30	6:111880440-111880754	TE	1.1001
NHA-WT	ENSG00000056972	31	6:111880222-111880439	TE	1.1001
NHA-WT	ENSG00000056972	32	6:111880189-111880221	TE	1.1001
NHA-WT	ENSG00000056972	33	6:111880164-111880188	TE	1.1001
NHA-WT	ENSG00000056972	34	6:111880148-111880163	TE	1.1001
NHA-WT	ENSG00000056972	35	6:111880143-111880147	TE	1.1001
NHA-WT	ENSG00000056972	36	6:111877657-111880142	TE	1.1001
NHA-WT	ENSG00000057019	1	3:98620171-98620533	TS	0
NHA-WT	ENSG00000057019	2	3:98620016-98620170	TS	0
NHA-WT	ENSG00000057019	3	3:98619966-98620015	TS	0
NHA-WT	ENSG00000057019	30	3:98520444-98520493	CE	0
NHA-WT	ENSG00000057019	34	3:98518680-98518685	TE	0
NHA-WT	ENSG00000057019	35	3:98516627-98518679	TE	0
NHA-WT	ENSG00000057019	36	3:98514785-98516626	TE	0
NHA-WT	ENSG00000057608	23	10:5810176-5810347	CE	0
NHA-WT	ENSG00000057608	24	10:5808457-5808601	CE	0
NHA-WT	ENSG00000057608	25	10:5808259-5808456	RI	0.657133
NHA-WT	ENSG00000057608	26	10:5808204-5808258	CE	0
NHA-WT	ENSG00000057608	27	10:5807917-5808115	TE	0.297133
NHA-WT	ENSG00000057608	28	10:5807884-5807916	TE	0.297133
NHA-WT	ENSG00000057608	29	10:5807812-5807883	TE	0.297133
NHA-WT	ENSG00000057608	30	10:5807192-5807811	TE	0.297133
NHA-WT	ENSG00000057608	31	10:5807186-5807191	TE	0.297133
NHA-WT	ENSG00000058063	48	3:182635811-182636129	TE	0
NHA-WT	ENSG00000058063	49	3:182636130-182636851	TE	0
NHA-WT	ENSG00000058063	50	3:182636852-182639423	TE	0
NHA-WT	ENSG00000058262	16	3:127783782-127783863	RI	0
NHA-WT	ENSG00000058262	17	3:127783864-127783880	CE	0
NHA-WT	ENSG00000058262	18	3:127783881-127784099	AD	0
NHA-WT	ENSG00000058262	24	3:127788319-127788594	TE	1.04873
NHA-WT	ENSG00000058262	25	3:127788595-127788682	TE	1.04873
NHA-WT	ENSG00000058262	26	3:127788683-127790520	TE	1.04873
NHA-WT	ENSG00000058262	27	3:127790521-127790525	TE	1.04873
NHA-WT	ENSG00000058262	28	3:127790526-127790526	TE	1.04873
NHA-WT	ENSG00000058272	45	12:80189418-80189539	CE	0
NHA-WT	ENSG00000058600	56	16:22343381-22343443	AA	0
NHA-WT	ENSG00000058600	58	16:22344965-22345017	TE	1.08697
NHA-WT	ENSG00000058600	59	16:22345018-22345256	TE	1.08697
NHA-WT	ENSG00000058600	60	16:22345257-22345346	TE	1.08697
NHA-WT	ENSG00000058600	61	16:22345347-22345382	TE	1.08697
NHA-WT	ENSG00000058600	62	16:22345383-22345762	TE	1.08697
NHA-WT	ENSG00000058600	63	16:22345763-22346424	TE	1.08697
NHA-WT	ENSG00000058673	41	1:203821269-203821548	TE	0.7
NHA-WT	ENSG00000058673	42	1:203821549-203821558	TE	0.7
NHA-WT	ENSG00000058673	43	1:203821559-203823162	TE	0.7
NHA-WT	ENSG00000058673	44	1:203823163-203823246	TE	0.7
NHA-WT	ENSG00000058673	45	1:203823247-203823252	TE	0.7
NHA-WT	ENSG00000058729	1	5:96518947-96518964	TS	0.1796
NHA-WT	ENSG00000058729	2	5:96518927-96518946	TS	0.1796
NHA-WT	ENSG00000058729	3	5:96518875-96518926	TS	0.1796
NHA-WT	ENSG00000058729	4	5:96518865-96518874	TS	0.1796
NHA-WT	ENSG00000058729	5	5:96518830-96518864	TS	0.1796
NHA-WT	ENSG00000059145	50	16:1417093-1417242	AD	0
NHA-WT	ENSG00000059145	54	16:1415666-1416018	TE	0.568133
NHA-WT	ENSG00000059145	55	16:1415013-1415665	TE	0.568133
NHA-WT	ENSG00000059145	56	16:1415000-1415012	TE	0.568133
NHA-WT	ENSG00000059145	58	16:1414175-1414256	TE	0.6355
NHA-WT	ENSG00000059145	59	16:1413207-1414174	TE	0.6355
NHA-WT	ENSG00000059145	60	16:1413206-1413206	TE	0.6355
NHA-WT	ENSG00000059377	1	7:139476850-139476945	TS	0
NHA-WT	ENSG00000059377	2	7:139476946-139477040	TS	0
NHA-WT	ENSG00000059378	1	7:139762734-139763521	TS	0
NHA-WT	ENSG00000059378	2	7:139762352-139762733	TS	0
NHA-WT	ENSG00000059378	3	7:139762322-139762351	TS	0
NHA-WT	ENSG00000059691	33	4:152593914-152594048	CE	0
NHA-WT	ENSG00000059691	34	4:152593761-152593913	AD	0
NHA-WT	ENSG00000059758	39	12:96674322-96674585	TE	0.48435
NHA-WT	ENSG00000059758	40	12:96674202-96674321	TE	0.48435
NHA-WT	ENSG00000059804	19	12:8082280-8082467	CE	0
NHA-WT	ENSG00000059915	22	10:104165294-104165368	AA	0
NHA-WT	ENSG00000059915	30	10:104164485-104164654	RI	0
NHA-WT	ENSG00000060237	68	12:1017641-1017958	TE	0
NHA-WT	ENSG00000060237	69	12:1017959-1018199	TE	0
NHA-WT	ENSG00000060237	70	12:1018200-1020466	TE	0
NHA-WT	ENSG00000060237	71	12:1020467-1020618	TE	0
NHA-WT	ENSG00000060982	22	12:24970743-24970983	TE	0
NHA-WT	ENSG00000060982	23	12:24970590-24970742	TE	0
NHA-WT	ENSG00000060982	24	12:24970415-24970589	TE	0
NHA-WT	ENSG00000060982	25	12:24967755-24970414	TE	0
NHA-WT	ENSG00000060982	26	12:24967737-24967754	TE	0
NHA-WT	ENSG00000060982	27	12:24964295-24967736	TE	0
NHA-WT	ENSG00000061273	83	12:48178585-48179015	RI	0
NHA-WT	ENSG00000061273	85	12:48178001-48178477	RI	0
NHA-WT	ENSG00000061273	87	12:48177624-48177669	TE	1.05463
NHA-WT	ENSG00000061273	88	12:48177583-48177623	TE	1.05463
NHA-WT	ENSG00000061273	89	12:48177504-48177582	TE	1.05463
NHA-WT	ENSG00000061273	90	12:48177457-48177503	TE	1.05463
NHA-WT	ENSG00000061273	91	12:48177434-48177456	TE	1.05463
NHA-WT	ENSG00000061273	92	12:48177421-48177433	TE	1.05463
NHA-WT	ENSG00000061273	93	12:48177299-48177420	TE	1.05463
NHA-WT	ENSG00000061273	94	12:48176509-48177298	TE	1.05463
NHA-WT	ENSG00000061273	95	12:48176505-48176508	TE	1.05463
NHA-WT	ENSG00000061656	2	20:34204802-34204945	TS	0.0948667
NHA-WT	ENSG00000061656	3	20:34204946-34204967	TS	0.0948667
NHA-WT	ENSG00000061656	4	20:34204968-34205057	TS	0.0948667
NHA-WT	ENSG00000061656	5	20:34205058-34205162	CE	0
NHA-WT	ENSG00000061656	6	20:34205442-34205508	CE	0
NHA-WT	ENSG00000061656	9	20:34205701-34205762	CE	0
NHA-WT	ENSG00000061656	12	20:34206398-34206533	RI	0
NHA-WT	ENSG00000061656	13	20:34206534-34206642	CE	0
NHA-WT	ENSG00000061656	14	20:34206643-34206690	RI	0
NHA-WT	ENSG00000061656	25	20:34208798-34208856	TE	0
NHA-WT	ENSG00000061656	26	20:34208857-34208971	TE	0
NHA-WT	ENSG00000061676	1	2:183903201-183903586	TS	0
NHA-WT	ENSG00000061676	2	2:183902720-183903200	TS	0
NHA-WT	ENSG00000061987	58	12:62986366-62986638	TE	0.7142
NHA-WT	ENSG00000061987	59	12:62986639-62986645	TE	0.7142
NHA-WT	ENSG00000061987	60	12:62986646-62986861	TE	0.7142
NHA-WT	ENSG00000061987	61	12:62986862-62987058	TE	0.7142
NHA-WT	ENSG00000061987	62	12:62987059-62989390	TE	0.7142
NHA-WT	ENSG00000061987	63	12:62989391-62991363	TE	0.7142
NHA-WT	ENSG00000062485	77	12:56667039-56667370	RI	0.304767
NHA-WT	ENSG00000062598	46	20:45001880-45002037	TE	0
NHA-WT	ENSG00000062598	47	20:45001474-45001879	TE	0
NHA-WT	ENSG00000062598	55	20:44995999-44996199	TE	1.38567
NHA-WT	ENSG00000062598	56	20:44995850-44995998	TE	1.38567
NHA-WT	ENSG00000062598	57	20:44995800-44995849	TE	1.38567
NHA-WT	ENSG00000062598	58	20:44995767-44995799	TE	1.38567
NHA-WT	ENSG00000062598	59	20:44994694-44995766	TE	1.38567
NHA-WT	ENSG00000062598	60	20:44994693-44994693	TE	1.38567
NHA-WT	ENSG00000062598	61	20:44994689-44994692	TE	1.38567
NHA-WT	ENSG00000062598	62	20:44994688-44994688	TE	1.38567
NHA-WT	ENSG00000062716	44	17:57917129-57917364	TE	0.6424
NHA-WT	ENSG00000062716	45	17:57917365-57917385	TE	0.6424
NHA-WT	ENSG00000062716	46	17:57917386-57917467	TE	0.6424
NHA-WT	ENSG00000062716	47	17:57917468-57917492	TE	0.6424
NHA-WT	ENSG00000062716	48	17:57917493-57917524	TE	0.6424
NHA-WT	ENSG00000062716	49	17:57917525-57917532	TE	0.6424
NHA-WT	ENSG00000062716	50	17:57917533-57917568	TE	0.6424
NHA-WT	ENSG00000062716	51	17:57917569-57917584	TE	0.6424
NHA-WT	ENSG00000062716	52	17:57917585-57917676	TE	0.6424
NHA-WT	ENSG00000062716	53	17:57917677-57918453	TE	0.6424
NHA-WT	ENSG00000062716	54	17:57918454-57919616	TE	0.6424
NHA-WT	ENSG00000063015	15	17:27287523-27287631	AD	0
NHA-WT	ENSG00000063015	17	17:27286856-27286910	AA	0
NHA-WT	ENSG00000063015	18	17:27286716-27286855	CE	0
NHA-WT	ENSG00000063015	23	17:27284366-27284557	CE	0
NHA-WT	ENSG00000063015	34	17:27282866-27282996	AA	0
NHA-WT	ENSG00000063015	35	17:27282149-27282865	TE	1.05417
NHA-WT	ENSG00000063015	36	17:27281924-27282148	TE	1.05417
NHA-WT	ENSG00000063015	37	17:27281923-27281923	TE	1.05417
NHA-WT	ENSG00000063015	38	17:27281919-27281922	TE	1.05417
NHA-WT	ENSG00000063046	40	12:53432196-53433021	RI	0.84745
NHA-WT	ENSG00000063046	41	12:53433022-53433127	CE	0
NHA-WT	ENSG00000063046	43	12:53433927-53434064	TE	0
NHA-WT	ENSG00000063046	44	12:53434065-53434136	TE	0
NHA-WT	ENSG00000063046	45	12:53434137-53434246	TE	0
NHA-WT	ENSG00000063046	46	12:53434247-53435993	TE	0
NHA-WT	ENSG00000063176	34	19:49132984-49133030	TE	0.48205
NHA-WT	ENSG00000063176	35	19:49133031-49133173	TE	0.48205
NHA-WT	ENSG00000063176	36	19:49133174-49133662	TE	0.48205
NHA-WT	ENSG00000063176	37	19:49133691-49133973	TE	0.0012
NHA-WT	ENSG00000063176	38	19:49133974-49133974	TE	0.0012
NHA-WT	ENSG00000063244	1	19:56165512-56166430	TS	0
NHA-WT	ENSG00000063244	2	19:56166431-56166447	TS	0
NHA-WT	ENSG00000063244	3	19:56166448-56166474	TS	0
NHA-WT	ENSG00000063244	4	19:56166475-56166519	TS	0
NHA-WT	ENSG00000063322	12	19:39888167-39888338	TE	0.996233
NHA-WT	ENSG00000063322	13	19:39888339-39889247	TE	0.996233
NHA-WT	ENSG00000063322	14	19:39889248-39890199	TE	0.996233
NHA-WT	ENSG00000063322	15	19:39890200-39890616	TE	0.996233
NHA-WT	ENSG00000063322	16	19:39890617-39891277	TE	0.996233
NHA-WT	ENSG00000063438	27	5:433968-434524	TE	0.657
NHA-WT	ENSG00000063438	28	5:434525-434972	TE	0.657
NHA-WT	ENSG00000063438	29	5:434973-435008	TE	0.657
NHA-WT	ENSG00000063438	30	5:435009-435224	TE	0.657
NHA-WT	ENSG00000063438	31	5:435225-435225	TE	0.657
NHA-WT	ENSG00000063438	32	5:435226-438406	TE	0.657
NHA-WT	ENSG00000063601	49	X:149932985-149933397	TE	0.242433
NHA-WT	ENSG00000063601	50	X:149933398-149933575	TE	0.242433
NHA-WT	ENSG00000063601	51	X:149933576-149933576	TE	0.242433
NHA-WT	ENSG00000063660	27	2:241405863-241406210	TE	0
NHA-WT	ENSG00000063660	28	2:241406211-241407493	TE	0
NHA-WT	ENSG00000063854	29	16:1859384-1859447	AA	0
NHA-WT	ENSG00000063854	30	16:1859239-1859383	CE	0
NHA-WT	ENSG00000063854	31	16:1859125-1859238	TE	0.24795
NHA-WT	ENSG00000063854	32	16:1859106-1859124	TE	0.24795
NHA-WT	ENSG00000063854	33	16:1859104-1859105	TE	0.24795
NHA-WT	ENSG00000063854	34	16:1858874-1859103	TE	0.24795
NHA-WT	ENSG00000063854	35	16:1858873-1858873	TE	0.24795
NHA-WT	ENSG00000063978	46	4:2515525-2515538	TE	1.4594
NHA-WT	ENSG00000063978	47	4:2515539-2516201	TE	1.4594
NHA-WT	ENSG00000063978	48	4:2516202-2516230	TE	1.4594
NHA-WT	ENSG00000063978	49	4:2516231-2517581	TE	1.4594
NHA-WT	ENSG00000063978	50	4:2517582-2517582	TE	1.4594
NHA-WT	ENSG00000063978	51	4:2517583-2517584	TE	1.4594
NHA-WT	ENSG00000064115	50	12:27127087-27127160	TE	0
NHA-WT	ENSG00000064115	51	12:27127029-27127086	TE	0
NHA-WT	ENSG00000064115	52	12:27126128-27127028	TE	0
NHA-WT	ENSG00000064225	1	3:98451080-98451098	TS	0.16685
NHA-WT	ENSG00000064225	2	3:98451099-98451108	TS	0.16685
NHA-WT	ENSG00000064225	3	3:98451109-98451109	TS	0.16685
NHA-WT	ENSG00000064225	4	3:98451110-98451212	TS	0.16685
NHA-WT	ENSG00000064225	5	3:98451213-98451222	TS	0.16685
NHA-WT	ENSG00000064225	6	3:98451223-98451293	TS	0.16685
NHA-WT	ENSG00000064225	7	3:98451294-98451318	TS	0.16685
NHA-WT	ENSG00000064225	8	3:98451319-98451376	TS	0.16685
NHA-WT	ENSG00000064225	57	3:98512637-98512788	TE	0.0043
NHA-WT	ENSG00000064225	58	3:98512789-98513206	TE	0.0043
NHA-WT	ENSG00000064225	59	3:98513207-98513234	TE	0.0043
NHA-WT	ENSG00000064225	60	3:98513235-98513237	TE	0.0043
NHA-WT	ENSG00000064225	61	3:98513238-98514098	TE	0.0043
NHA-WT	ENSG00000064225	62	3:98514099-98514689	TE	0.0043
NHA-WT	ENSG00000064225	64	3:98520266-98520299	CE	0
NHA-WT	ENSG00000064225	65	3:98520300-98520392	RI	0
NHA-WT	ENSG00000064225	66	3:98520393-98520461	CE	0
NHA-WT	ENSG00000064225	67	3:98539632-98539841	TE	0.649033
NHA-WT	ENSG00000064225	68	3:98539842-98540045	TE	0.649033
NHA-WT	ENSG00000064270	44	16:84494300-84494368	TS	0
NHA-WT	ENSG00000064270	45	16:84494369-84494407	TS	0
NHA-WT	ENSG00000064270	47	16:84495320-84495418	CE	0
NHA-WT	ENSG00000064270	48	16:84495419-84495593	RI	0
NHA-WT	ENSG00000064270	51	16:84497220-84497336	TE	0.772567
NHA-WT	ENSG00000064270	52	16:84497337-84497606	TE	0.772567
NHA-WT	ENSG00000064270	53	16:84497607-84497784	TE	0.772567
NHA-WT	ENSG00000064270	54	16:84497785-84497785	TE	0.772567
NHA-WT	ENSG00000064270	55	16:84497786-84497793	TE	0.772567
NHA-WT	ENSG00000064419	1	7:128695148-128695198	TS	0.453167
NHA-WT	ENSG00000064419	2	7:128694969-128695147	TS	0.453167
NHA-WT	ENSG00000064419	3	7:128694938-128694968	TS	0.453167
NHA-WT	ENSG00000064419	4	7:128694705-128694937	TS	0.453167
NHA-WT	ENSG00000064490	1	19:19303008-19303037	TS	0
NHA-WT	ENSG00000064490	2	19:19303038-19303038	TS	0
NHA-WT	ENSG00000064490	3	19:19303039-19303051	TS	0
NHA-WT	ENSG00000064490	4	19:19303052-19303082	TS	0
NHA-WT	ENSG00000064490	5	19:19303083-19303363	TS	0
NHA-WT	ENSG00000064490	36	19:19312458-19312465	AA	0
NHA-WT	ENSG00000064490	37	19:19312466-19312611	TE	0.798033
NHA-WT	ENSG00000064490	38	19:19312612-19312672	TE	0.798033
NHA-WT	ENSG00000064490	39	19:19312673-19312675	TE	0.798033
NHA-WT	ENSG00000064490	40	19:19312676-19312678	TE	0.798033
NHA-WT	ENSG00000064601	1	20:44518783-44519682	TS	0.735933
NHA-WT	ENSG00000064601	2	20:44519683-44519951	TS	0.735933
NHA-WT	ENSG00000064601	3	20:44519952-44519960	TS	0.735933
NHA-WT	ENSG00000064601	4	20:44519961-44519973	TS	0.735933
NHA-WT	ENSG00000064601	5	20:44519974-44519979	TS	0.735933
NHA-WT	ENSG00000064601	6	20:44519980-44519993	TS	0.735933
NHA-WT	ENSG00000064601	7	20:44519994-44519995	TS	0.735933
NHA-WT	ENSG00000064601	8	20:44519996-44520014	TS	0.735933
NHA-WT	ENSG00000064601	9	20:44520015-44520018	TS	0.735933
NHA-WT	ENSG00000064601	44	20:44525604-44525679	CE	0
NHA-WT	ENSG00000064601	47	20:44526356-44526422	TE	0
NHA-WT	ENSG00000064601	48	20:44526423-44526433	TE	0
NHA-WT	ENSG00000064601	50	20:44526446-44526546	RI	0
NHA-WT	ENSG00000064601	51	20:44526547-44526643	AA	0
NHA-WT	ENSG00000064601	52	20:44526644-44526748	CE	0
NHA-WT	ENSG00000064601	53	20:44527006-44527266	TE	0
NHA-WT	ENSG00000064601	54	20:44527267-44527425	TE	0
NHA-WT	ENSG00000064601	55	20:44527426-44527459	TE	0
NHA-WT	ENSG00000064607	1	19:19144626-19144832	TS	0
NHA-WT	ENSG00000064607	2	19:19144571-19144625	TS	0
NHA-WT	ENSG00000064703	1	1:112297867-112297926	TS	0
NHA-WT	ENSG00000064703	2	1:112297927-112298016	TS	0
NHA-WT	ENSG00000064726	16	15:83686713-83686977	TE	0.323067
NHA-WT	ENSG00000064726	17	15:83685174-83686712	TE	0.323067
NHA-WT	ENSG00000064763	27	12:29486565-29486667	CE	0
NHA-WT	ENSG00000064763	28	12:29486668-29487005	TE	0
NHA-WT	ENSG00000064763	29	12:29487006-29487006	TE	0
NHA-WT	ENSG00000064763	30	12:29487007-29488549	TE	0
NHA-WT	ENSG00000064932	50	19:1108564-1108703	TE	0.554533
NHA-WT	ENSG00000064932	51	19:1107641-1108563	TE	0.554533
NHA-WT	ENSG00000064932	52	19:1107640-1107640	TE	0.554533
NHA-WT	ENSG00000064932	53	19:1107636-1107639	TE	0.554533
NHA-WT	ENSG00000064995	6	6:34845750-34846497	TE	0
NHA-WT	ENSG00000064995	7	6:34845555-34845749	TE	0
NHA-WT	ENSG00000065029	1	6:35226686-35226758	TS	0.6606
NHA-WT	ENSG00000065029	2	6:35226759-35227163	TS	0.6606
NHA-WT	ENSG00000065150	23	13:98628145-98628251	CE	0
NHA-WT	ENSG00000065150	80	13:98667980-98668035	CE	0
NHA-WT	ENSG00000065150	81	13:98668983-98669105	CE	0
NHA-WT	ENSG00000065243	32	1:89298928-89299114	TE	0.115533
NHA-WT	ENSG00000065243	33	1:89299115-89299202	TE	0.115533
NHA-WT	ENSG00000065243	34	1:89299203-89299353	TE	0.115533
NHA-WT	ENSG00000065243	35	1:89299354-89299423	TE	0.115533
NHA-WT	ENSG00000065243	36	1:89299424-89301938	TE	0.115533
NHA-WT	ENSG00000065361	74	12:56495313-56495876	TE	0.933133
NHA-WT	ENSG00000065361	75	12:56495877-56496120	TE	0.933133
NHA-WT	ENSG00000065361	76	12:56496121-56496158	TE	0.933133
NHA-WT	ENSG00000065361	77	12:56496159-56496590	TE	0.933133
NHA-WT	ENSG00000065361	78	12:56496591-56496618	TE	0.933133
NHA-WT	ENSG00000065361	79	12:56496619-56497283	TE	0.933133
NHA-WT	ENSG00000065361	80	12:56497284-56497289	TE	0.933133
NHA-WT	ENSG00000065518	6	3:120315387-120315493	AD	0
NHA-WT	ENSG00000065526	21	1:16265791-16266039	TE	0.659767
NHA-WT	ENSG00000065526	22	1:16266040-16266955	TE	0.659767
NHA-WT	ENSG00000065534	53	3:123342926-123344163	TS	0.492467
NHA-WT	ENSG00000065534	54	3:123339474-123342925	TS	0.492467
NHA-WT	ENSG00000065534	55	3:123339362-123339473	TS	0.492467
NHA-WT	ENSG00000065534	56	3:123339344-123339361	TS	0.492467
NHA-WT	ENSG00000065534	57	3:123339184-123339343	RI	0
NHA-WT	ENSG00000065534	58	3:123339054-123339183	CE	0
NHA-WT	ENSG00000065534	62	3:123332952-123333196	TE	0.839767
NHA-WT	ENSG00000065534	63	3:123332911-123332951	TE	0.839767
NHA-WT	ENSG00000065534	64	3:123332892-123332910	TE	0.839767
NHA-WT	ENSG00000065534	65	3:123332876-123332891	TE	0.839767
NHA-WT	ENSG00000065534	66	3:123332187-123332875	TE	0.839767
NHA-WT	ENSG00000065534	67	3:123331157-123332186	TE	0.839767
NHA-WT	ENSG00000065534	68	3:123331145-123331156	TE	0.839767
NHA-WT	ENSG00000065534	69	3:123328896-123331144	TE	0.839767
NHA-WT	ENSG00000065600	15	1:212537824-212538718	TE	0
NHA-WT	ENSG00000065600	16	1:212537273-212537823	TE	0
NHA-WT	ENSG00000065618	66	10:105791962-105792048	CE	0
NHA-WT	ENSG00000065618	67	10:105791352-105791961	RI	0
NHA-WT	ENSG00000065618	68	10:105791046-105791351	TE	0
NHA-WT	ENSG00000065618	69	10:105791044-105791045	TE	0
NHA-WT	ENSG00000065621	21	10:106058886-106059169	TE	0.642167
NHA-WT	ENSG00000065621	22	10:106059170-106059172	TE	0.642167
NHA-WT	ENSG00000065621	23	10:106059173-106059175	TE	0.642167
NHA-WT	ENSG00000065621	24	10:106059176-106059176	TE	0.642167
NHA-WT	ENSG00000065621	25	10:106059177-106059616	TE	0.642167
NHA-WT	ENSG00000065621	26	10:106059617-106064703	TE	0.642167
NHA-WT	ENSG00000065665	32	10:12206267-12206546	TE	0.601233
NHA-WT	ENSG00000065665	33	10:12206547-12206826	TE	0.601233
NHA-WT	ENSG00000065665	34	10:12206827-12207403	TE	0.601233
NHA-WT	ENSG00000065665	35	10:12207404-12207411	TE	0.601233
NHA-WT	ENSG00000065665	37	10:12211257-12211955	TE	0.0086
NHA-WT	ENSG00000065665	38	10:12211956-12211960	TE	0.0086
NHA-WT	ENSG00000065883	1	7:39989636-39990108	TS	0
NHA-WT	ENSG00000065883	2	7:39990109-39991451	TS	0
NHA-WT	ENSG00000065883	18	7:40132384-40132563	AA	0
NHA-WT	ENSG00000065883	21	7:40133729-40135131	TE	0.957967
NHA-WT	ENSG00000065883	22	7:40135132-40135154	TE	0.957967
NHA-WT	ENSG00000065883	23	7:40135155-40136733	TE	0.957967
NHA-WT	ENSG00000065923	20	X:46466618-46466638	AA	0
NHA-WT	ENSG00000065923	24	X:46465730-46465805	TE	0.0249
NHA-WT	ENSG00000065923	25	X:46465696-46465729	TE	0.0249
NHA-WT	ENSG00000065923	26	X:46464753-46465695	TE	0.0249
NHA-WT	ENSG00000065970	1	12:8185299-8185955	TS	0
NHA-WT	ENSG00000065970	2	12:8185956-8186429	TS	0
NHA-WT	ENSG00000066027	20	1:212533980-212534264	TE	0
NHA-WT	ENSG00000066027	21	1:212534265-212535200	TE	0
NHA-WT	ENSG00000066084	45	12:51138370-51138878	TE	0.49555
NHA-WT	ENSG00000066084	46	12:51138879-51142450	TE	0.49555
NHA-WT	ENSG00000066117	1	12:50478755-50478982	TS	0
NHA-WT	ENSG00000066117	2	12:50478983-50479107	TS	0
NHA-WT	ENSG00000066117	3	12:50479108-50479110	TS	0
NHA-WT	ENSG00000066117	4	12:50479111-50479124	TS	0
NHA-WT	ENSG00000066117	5	12:50479125-50479135	TS	0
NHA-WT	ENSG00000066117	6	12:50479136-50479329	TS	0
NHA-WT	ENSG00000066135	21	1:44156516-44156720	CE	0
NHA-WT	ENSG00000066230	13	5:479951-480080	CE	0
NHA-WT	ENSG00000066248	30	2:233744085-233744389	TE	0.439367
NHA-WT	ENSG00000066248	31	2:233743925-233744084	TE	0.439367
NHA-WT	ENSG00000066248	32	2:233743396-233743924	TE	0.439367
NHA-WT	ENSG00000066322	33	1:43829721-43829808	TE	0.60345
NHA-WT	ENSG00000066322	34	1:43829686-43829720	TE	0.60345
NHA-WT	ENSG00000066322	35	1:43829665-43829685	TE	0.60345
NHA-WT	ENSG00000066322	36	1:43829546-43829664	TE	0.60345
NHA-WT	ENSG00000066322	37	1:43829507-43829545	TE	0.60345
NHA-WT	ENSG00000066322	38	1:43829442-43829506	TE	0.60345
NHA-WT	ENSG00000066322	39	1:43829427-43829441	TE	0.60345
NHA-WT	ENSG00000066322	40	1:43829399-43829426	TE	0.60345
NHA-WT	ENSG00000066322	41	1:43829073-43829398	TE	0.60345
NHA-WT	ENSG00000066322	42	1:43829068-43829072	TE	0.60345
NHA-WT	ENSG00000066379	1	6:30026676-30029030	TS	0
NHA-WT	ENSG00000066379	2	6:30029031-30029033	TS	0
NHA-WT	ENSG00000066379	3	6:30029034-30029035	TS	0
NHA-WT	ENSG00000066379	4	6:30029036-30029039	TS	0
NHA-WT	ENSG00000066379	5	6:30029040-30029106	TS	0
NHA-WT	ENSG00000066379	6	6:30029107-30029166	TS	0
NHA-WT	ENSG00000066405	2	3:137728842-137729057	TS	0.186367
NHA-WT	ENSG00000066405	3	3:137729058-137729287	TS	0.186367
NHA-WT	ENSG00000066405	7	3:137749812-137751344	TE	0.289033
NHA-WT	ENSG00000066405	8	3:137751345-137752491	TE	0.289033
NHA-WT	ENSG00000066405	9	3:137752492-137752494	TE	0.289033
NHA-WT	ENSG00000066422	1	3:101395963-101396339	TS	0.255567
NHA-WT	ENSG00000066422	2	3:101395449-101395962	TS	0.255567
NHA-WT	ENSG00000066427	44	14:92530438-92530758	TE	0
NHA-WT	ENSG00000066427	45	14:92530225-92530437	TE	0
NHA-WT	ENSG00000066427	46	14:92529118-92530224	TE	0
NHA-WT	ENSG00000066427	47	14:92527095-92529117	TE	0
NHA-WT	ENSG00000066583	2	5:128430742-128430768	AD	0
NHA-WT	ENSG00000066697	11	9:103212839-103212963	TE	0.4549
NHA-WT	ENSG00000066697	12	9:103212964-103212987	TE	0.4549
NHA-WT	ENSG00000066697	13	9:103212988-103213511	TE	0.4549
NHA-WT	ENSG00000066777	53	8:68111246-68111333	TE	0.332133
NHA-WT	ENSG00000066777	54	8:68110640-68111245	TE	0.332133
NHA-WT	ENSG00000066777	55	8:68109909-68110639	TE	0.332133
NHA-WT	ENSG00000066777	56	8:68109884-68109908	TE	0.332133
NHA-WT	ENSG00000066777	57	8:68087722-68087807	TE	0
NHA-WT	ENSG00000066777	58	8:68085747-68087721	TE	0
NHA-WT	ENSG00000066855	29	8:66631615-66631716	CE	0
NHA-WT	ENSG00000066855	36	8:66683182-66683487	TE	0
NHA-WT	ENSG00000066855	37	8:66683488-66683496	TE	0
NHA-WT	ENSG00000066923	40	7:99797859-99797951	CE	0
NHA-WT	ENSG00000066923	41	7:99797952-99798075	RI	0
NHA-WT	ENSG00000066923	64	7:99809418-99809499	CE	0
NHA-WT	ENSG00000066923	66	7:99811630-99812003	TE	0.0248
NHA-WT	ENSG00000066923	67	7:99812004-99812004	TE	0.0248
NHA-WT	ENSG00000066923	68	7:99812005-99812005	TE	0.0248
NHA-WT	ENSG00000066923	69	7:99812006-99812006	TE	0.0248
NHA-WT	ENSG00000066923	70	7:99812007-99812010	TE	0.0248
NHA-WT	ENSG00000066933	79	15:72118613-72119380	TE	0.3088
NHA-WT	ENSG00000066933	80	15:72118390-72118612	TE	0.3088
NHA-WT	ENSG00000066933	81	15:72118369-72118389	TE	0.3088
NHA-WT	ENSG00000066933	82	15:72118333-72118368	TE	0.3088
NHA-WT	ENSG00000066933	83	15:72114632-72118332	TE	0.3088
NHA-WT	ENSG00000067064	13	10:1086843-1087444	TE	0.233833
NHA-WT	ENSG00000067064	14	10:1085848-1086842	TE	0.233833
NHA-WT	ENSG00000067113	14	5:54720713-54721162	TE	0.880833
NHA-WT	ENSG00000067113	15	5:54720682-54720712	TE	0.880833
NHA-WT	ENSG00000067167	23	8:71487087-71487240	TE	0
NHA-WT	ENSG00000067167	24	8:71485677-71487086	TE	0
NHA-WT	ENSG00000067182	1	12:6451252-6451280	TS	0.4573
NHA-WT	ENSG00000067182	2	12:6451208-6451251	TS	0.4573
NHA-WT	ENSG00000067182	3	12:6451202-6451207	TS	0.4573
NHA-WT	ENSG00000067182	4	12:6451194-6451201	TS	0.4573
NHA-WT	ENSG00000067182	5	12:6451171-6451193	TS	0.4573
NHA-WT	ENSG00000067182	6	12:6451149-6451170	TS	0.4573
NHA-WT	ENSG00000067182	7	12:6451015-6451148	TS	0.4573
NHA-WT	ENSG00000067182	8	12:6450942-6451014	TS	0.4573
NHA-WT	ENSG00000067225	4	15:72523966-72524021	TS	0
NHA-WT	ENSG00000067225	5	15:72523940-72523965	TS	0
NHA-WT	ENSG00000067225	10	15:72523548-72523566	TS	0
NHA-WT	ENSG00000067225	11	15:72523532-72523547	TS	0
NHA-WT	ENSG00000067225	12	15:72523513-72523531	TS	0
NHA-WT	ENSG00000067225	13	15:72523457-72523512	TS	0
NHA-WT	ENSG00000067334	1	1:94344763-94345474	TS	0
NHA-WT	ENSG00000067334	2	1:94344721-94344762	TS	0
NHA-WT	ENSG00000067334	3	1:94344719-94344720	TS	0
NHA-WT	ENSG00000067334	4	1:94344713-94344718	TS	0
NHA-WT	ENSG00000067334	5	1:94344633-94344712	TS	0
NHA-WT	ENSG00000067369	61	15:43699414-43699768	TE	0
NHA-WT	ENSG00000067369	62	15:43699412-43699413	TE	0
NHA-WT	ENSG00000067369	63	15:43699407-43699411	TE	0
NHA-WT	ENSG00000067560	17	3:49397555-49397815	TE	0.8496
NHA-WT	ENSG00000067560	18	3:49397325-49397554	TE	0.8496
NHA-WT	ENSG00000067560	19	3:49396578-49397324	TE	0.8496
NHA-WT	ENSG00000067596	32	17:41603755-41603863	AA	0
NHA-WT	ENSG00000067606	59	1:2106193-2106272	CE	0
NHA-WT	ENSG00000067606	60	1:2106663-2106752	CE	0
NHA-WT	ENSG00000067606	61	1:2113271-2113353	CE	0
NHA-WT	ENSG00000067606	63	1:2116361-2116555	TE	1.09393
NHA-WT	ENSG00000067606	64	1:2116556-2116629	TE	1.09393
NHA-WT	ENSG00000067606	65	1:2116630-2116829	TE	1.09393
NHA-WT	ENSG00000067606	66	1:2116830-2116832	TE	1.09393
NHA-WT	ENSG00000067606	67	1:2116833-2116834	TE	1.09393
NHA-WT	ENSG00000067704	31	1:220320835-220321376	TE	0
NHA-WT	ENSG00000067704	32	1:220321377-220321380	TE	0
NHA-WT	ENSG00000067715	36	12:79842698-79844059	TE	0.2792
NHA-WT	ENSG00000067715	37	12:79844060-79844074	TE	0.2792
NHA-WT	ENSG00000067715	38	12:79844075-79845786	TE	0.2792
NHA-WT	ENSG00000067715	39	12:79845787-79845788	TE	0.2792
NHA-WT	ENSG00000067840	22	X:153070334-153070355	TE	0.78455
NHA-WT	ENSG00000067840	23	X:153068742-153070333	TE	0.78455
NHA-WT	ENSG00000067840	24	X:153067623-153068741	TE	0.78455
NHA-WT	ENSG00000067840	25	X:153067621-153067622	TE	0.78455
NHA-WT	ENSG00000068028	7	3:50375443-50375454	AA	0
NHA-WT	ENSG00000068028	8	3:50375336-50375442	CE	0
NHA-WT	ENSG00000068028	9	3:50375004-50375335	RI	0
NHA-WT	ENSG00000068078	30	4:1808843-1810592	TE	0.0544
NHA-WT	ENSG00000068078	31	4:1810593-1810598	TE	0.0544
NHA-WT	ENSG00000068078	32	4:1810599-1810599	TE	0.0544
NHA-WT	ENSG00000068079	17	17:41165391-41165396	AD	0
NHA-WT	ENSG00000068137	33	17:40821448-40821538	CE	0
NHA-WT	ENSG00000068137	34	17:40820322-40821447	RI	0
NHA-WT	ENSG00000068354	14	X:48418002-48418073	TE	0.347033
NHA-WT	ENSG00000068354	15	X:48418074-48418110	TE	0.347033
NHA-WT	ENSG00000068354	16	X:48418111-48418274	TE	0.347033
NHA-WT	ENSG00000068354	17	X:48418275-48419483	TE	0.347033
NHA-WT	ENSG00000068354	18	X:48419484-48420997	TE	0.347033
NHA-WT	ENSG00000068366	1	X:108976622-108976632	TS	0.3714
NHA-WT	ENSG00000068366	2	X:108976555-108976621	TS	0.3714
NHA-WT	ENSG00000068366	3	X:108976532-108976554	TS	0.3714
NHA-WT	ENSG00000068366	4	X:108976505-108976531	TS	0.3714
NHA-WT	ENSG00000068366	5	X:108976461-108976504	TS	0.3714
NHA-WT	ENSG00000068366	6	X:108976443-108976460	TS	0.3714
NHA-WT	ENSG00000068366	7	X:108976368-108976442	TS	0.3714
NHA-WT	ENSG00000068615	23	2:86444087-86444233	TE	0.2756
NHA-WT	ENSG00000068615	24	2:86441122-86444086	TE	0.2756
NHA-WT	ENSG00000068615	25	2:86441116-86441121	TE	0.2756
NHA-WT	ENSG00000068724	3	2:47168313-47168413	TS	0.1304
NHA-WT	ENSG00000068724	4	2:47168414-47168424	TS	0.1304
NHA-WT	ENSG00000068724	5	2:47168425-47168681	TS	0.1304
NHA-WT	ENSG00000068724	6	2:47168682-47168864	TS	0.1304
NHA-WT	ENSG00000068793	59	15:23002876-23003602	TE	0
NHA-WT	ENSG00000068793	60	15:23003603-23005943	TE	0
NHA-WT	ENSG00000068793	61	15:23005944-23006016	TE	0
NHA-WT	ENSG00000068796	36	5:61681311-61681455	TE	0.3212
NHA-WT	ENSG00000068796	37	5:61681456-61681503	TE	0.3212
NHA-WT	ENSG00000068796	38	5:61681504-61681546	TE	0.3212
NHA-WT	ENSG00000068796	39	5:61681547-61682210	TE	0.3212
NHA-WT	ENSG00000068885	1	3:160117333-160117668	TS	0.876433
NHA-WT	ENSG00000068885	2	3:160117322-160117332	TS	0.876433
NHA-WT	ENSG00000068885	3	3:160117321-160117321	TS	0.876433
NHA-WT	ENSG00000068885	4	3:160117309-160117320	TS	0.876433
NHA-WT	ENSG00000068885	5	3:160117188-160117308	TS	0.876433
NHA-WT	ENSG00000068885	6	3:160117157-160117187	AD	0
NHA-WT	ENSG00000068912	17	2:54045035-54045357	TE	0
NHA-WT	ENSG00000068912	18	2:54045358-54045956	TE	0
NHA-WT	ENSG00000069275	8	1:205687580-205687607	TE	0
NHA-WT	ENSG00000069275	9	1:205681947-205687579	TE	0
NHA-WT	ENSG00000069667	25	15:60823727-60823964	TE	0.2631
NHA-WT	ENSG00000069667	26	15:60820272-60823726	TE	0.2631
NHA-WT	ENSG00000069667	39	15:60789484-60789818	TE	0.242233
NHA-WT	ENSG00000069667	40	15:60789463-60789483	TE	0.242233
NHA-WT	ENSG00000069667	41	15:60780483-60789462	TE	0.242233
NHA-WT	ENSG00000069764	1	16:14788134-14788526	TS	0
NHA-WT	ENSG00000069764	2	16:14787990-14788133	TS	0
NHA-WT	ENSG00000069849	22	3:141644373-141644485	TE	1.08855
NHA-WT	ENSG00000069849	23	3:141644486-141644570	TE	1.08855
NHA-WT	ENSG00000069849	24	3:141644571-141644827	TE	1.08855
NHA-WT	ENSG00000069849	25	3:141644828-141645024	TE	1.08855
NHA-WT	ENSG00000069849	26	3:141645025-141645323	TE	1.08855
NHA-WT	ENSG00000069849	27	3:141645324-141645326	TE	1.08855
NHA-WT	ENSG00000069849	28	3:141645327-141645356	TE	1.08855
NHA-WT	ENSG00000069869	6	15:56279929-56280199	TE	0
NHA-WT	ENSG00000069869	7	15:56279407-56279928	TE	0
NHA-WT	ENSG00000069869	16	15:56209307-56209329	TS	0.4998
NHA-WT	ENSG00000069869	17	15:56208668-56209306	TS	0.4998
NHA-WT	ENSG00000069869	18	15:56207853-56208667	TS	0.4998
NHA-WT	ENSG00000069869	19	15:56207482-56207852	TS	0.4998
NHA-WT	ENSG00000069869	48	15:56119533-56122197	TE	0
NHA-WT	ENSG00000069869	49	15:56119120-56119532	TE	0
NHA-WT	ENSG00000069943	1	15:55611158-55611429	TS	0
NHA-WT	ENSG00000069943	2	15:55611430-55611442	TS	0
NHA-WT	ENSG00000069943	3	15:55611443-55611470	TS	0
NHA-WT	ENSG00000069943	4	15:55611471-55611611	TS	0
NHA-WT	ENSG00000069943	27	15:55647484-55647842	TE	0.0192
NHA-WT	ENSG00000069943	28	15:55647843-55647845	TE	0.0192
NHA-WT	ENSG00000069943	29	15:55647846-55647846	TE	0.0192
NHA-WT	ENSG00000069956	20	15:52342190-52342334	CE	0
NHA-WT	ENSG00000069956	21	15:52350830-52350994	CE	0
NHA-WT	ENSG00000070010	28	22:19439524-19442271	RI	0
NHA-WT	ENSG00000070010	29	22:19439401-19439523	CE	0
NHA-WT	ENSG00000070010	30	22:19438268-19439400	RI	0
NHA-WT	ENSG00000070010	31	22:19438148-19438267	TE	0.0141
NHA-WT	ENSG00000070010	32	22:19438144-19438147	TE	0.0141
NHA-WT	ENSG00000070010	33	22:19437464-19438143	TE	0.0141
NHA-WT	ENSG00000070010	34	22:19437433-19437463	TE	0.0141
NHA-WT	ENSG00000070087	41	3:149682722-149683134	TE	0
NHA-WT	ENSG00000070087	42	3:149682700-149682721	TE	0
NHA-WT	ENSG00000070087	43	3:149682691-149682699	TE	0
NHA-WT	ENSG00000070182	45	14:65220255-65220511	CE	0
NHA-WT	ENSG00000070182	49	14:65215673-65216191	TE	0
NHA-WT	ENSG00000070182	50	14:65215655-65215672	TE	0
NHA-WT	ENSG00000070182	51	14:65215025-65215654	TE	0
NHA-WT	ENSG00000070182	52	14:65213002-65215024	TE	0
NHA-WT	ENSG00000070366	52	17:1964845-1964916	TE	1.1019
NHA-WT	ENSG00000070366	53	17:1964746-1964844	TE	1.1019
NHA-WT	ENSG00000070366	54	17:1964699-1964745	TE	1.1019
NHA-WT	ENSG00000070366	55	17:1964668-1964698	TE	1.1019
NHA-WT	ENSG00000070366	56	17:1963170-1964667	TE	1.1019
NHA-WT	ENSG00000070366	57	17:1963144-1963169	TE	1.1019
NHA-WT	ENSG00000070366	58	17:1963140-1963143	TE	1.1019
NHA-WT	ENSG00000070366	59	17:1963137-1963139	TE	1.1019
NHA-WT	ENSG00000070366	60	17:1963133-1963136	TE	1.1019
NHA-WT	ENSG00000070367	1	14:57735618-57735726	TS	0.647967
NHA-WT	ENSG00000070367	2	14:57735556-57735617	TS	0.647967
NHA-WT	ENSG00000070367	3	14:57735542-57735555	TS	0.647967
NHA-WT	ENSG00000070367	4	14:57735444-57735541	TS	0.647967
NHA-WT	ENSG00000070367	5	14:57735340-57735443	TS	0.647967
NHA-WT	ENSG00000070444	19	17:2290858-2290943	TE	0
NHA-WT	ENSG00000070444	20	17:2290792-2290857	TE	0
NHA-WT	ENSG00000070444	21	17:2290638-2290791	TE	0
NHA-WT	ENSG00000070444	22	17:2290614-2290637	TE	0
NHA-WT	ENSG00000070444	23	17:2287354-2290613	TE	0
NHA-WT	ENSG00000070540	29	17:66417826-66417961	CE	0
NHA-WT	ENSG00000070610	23	9:35738749-35738900	CE	0
NHA-WT	ENSG00000070610	26	9:35738523-35738629	CE	0
NHA-WT	ENSG00000070610	27	9:35738372-35738522	RI	0
NHA-WT	ENSG00000070610	30	9:35738150-35738228	RI	0
NHA-WT	ENSG00000070610	35	9:35737602-35737744	RI	0
NHA-WT	ENSG00000070610	36	9:35737445-35737601	AA	0
NHA-WT	ENSG00000070610	37	9:35736940-35737444	TE	0.230833
NHA-WT	ENSG00000070610	38	9:35736864-35736939	TE	0.230833
NHA-WT	ENSG00000070610	39	9:35736863-35736863	TE	0.230833
NHA-WT	ENSG00000070729	48	16:57918272-57918361	TE	0
NHA-WT	ENSG00000070729	49	16:57917706-57918271	TE	0
NHA-WT	ENSG00000070729	50	16:57917503-57917705	TE	0
NHA-WT	ENSG00000070731	28	17:74563635-74564794	RI	0
NHA-WT	ENSG00000070731	29	17:74563535-74563634	CE	0
NHA-WT	ENSG00000070731	30	17:74562215-74562353	TE	0
NHA-WT	ENSG00000070731	31	17:74562188-74562214	TE	0
NHA-WT	ENSG00000070731	32	17:74561461-74562187	TE	0
NHA-WT	ENSG00000070731	33	17:74559792-74561460	TE	0
NHA-WT	ENSG00000070756	35	8:101727690-101727698	AD	0
NHA-WT	ENSG00000070756	46	8:101721687-101721779	CE	0
NHA-WT	ENSG00000070756	65	8:101715513-101715587	TE	0.1207
NHA-WT	ENSG00000070756	66	8:101715487-101715512	TE	0.1207
NHA-WT	ENSG00000070756	67	8:101715389-101715486	TE	0.1207
NHA-WT	ENSG00000070756	68	8:101715327-101715388	TE	0.1207
NHA-WT	ENSG00000070756	69	8:101715144-101715326	TE	0.1207
NHA-WT	ENSG00000070759	20	1:45809971-45811230	TE	0.8657
NHA-WT	ENSG00000070759	21	1:45809556-45809970	TE	0.8657
NHA-WT	ENSG00000070759	22	1:45809555-45809555	TE	0.8657
NHA-WT	ENSG00000070778	32	14:88934299-88934609	TE	0.5572
NHA-WT	ENSG00000070778	33	14:88934114-88934298	TE	0.5572
NHA-WT	ENSG00000070778	34	14:88932125-88934113	TE	0.5572
NHA-WT	ENSG00000070778	35	14:88932122-88932124	TE	0.5572
NHA-WT	ENSG00000070985	29	11:2426139-2426273	TE	6.66667e-05
NHA-WT	ENSG00000070985	30	11:2426133-2426138	TE	6.66667e-05
NHA-WT	ENSG00000070985	31	11:2425748-2426132	TE	6.66667e-05
NHA-WT	ENSG00000070985	32	11:2425745-2425747	TE	6.66667e-05
NHA-WT	ENSG00000071082	1	2:101618177-101618690	TS	0
NHA-WT	ENSG00000071082	2	2:101618691-101618744	TS	0
NHA-WT	ENSG00000071082	3	2:101618745-101618754	TS	0
NHA-WT	ENSG00000071082	4	2:101618755-101618772	TS	0
NHA-WT	ENSG00000071082	5	2:101618773-101618777	TS	0
NHA-WT	ENSG00000071082	10	2:101620620-101620745	CE	0
NHA-WT	ENSG00000071082	16	2:101622812-101622829	TE	1.15573
NHA-WT	ENSG00000071082	17	2:101622830-101622880	TE	1.15573
NHA-WT	ENSG00000071082	18	2:101622881-101622881	TE	1.15573
NHA-WT	ENSG00000071082	19	2:101622882-101622885	TE	1.15573
NHA-WT	ENSG00000071082	20	2:101622886-101623729	TE	1.15573
NHA-WT	ENSG00000071082	21	2:101634321-101634350	AA	0
NHA-WT	ENSG00000071082	22	2:101634351-101634751	TE	0
NHA-WT	ENSG00000071082	23	2:101634752-101634768	TE	0
NHA-WT	ENSG00000071127	8	4:10117859-10117954	RI	0
NHA-WT	ENSG00000071127	9	4:10117737-10117858	CE	0
NHA-WT	ENSG00000071246	14	14:77245289-77246318	TE	0
NHA-WT	ENSG00000071246	15	14:77246319-77249354	TE	0
NHA-WT	ENSG00000071539	1	5:892758-892998	TS	0
NHA-WT	ENSG00000071539	2	5:892999-893139	TS	0
NHA-WT	ENSG00000071539	3	5:893140-893205	TS	0
NHA-WT	ENSG00000071553	1	X:153656978-153656990	TS	0.7887
NHA-WT	ENSG00000071553	2	X:153656991-153657008	TS	0.7887
NHA-WT	ENSG00000071553	3	X:153657009-153657032	TS	0.7887
NHA-WT	ENSG00000071553	4	X:153657033-153657034	TS	0.7887
NHA-WT	ENSG00000071553	5	X:153657035-153657043	TS	0.7887
NHA-WT	ENSG00000071553	6	X:153657044-153657086	TS	0.7887
NHA-WT	ENSG00000071553	7	X:153657087-153657190	TS	0.7887
NHA-WT	ENSG00000071553	8	X:153657191-153657199	TS	0.7887
NHA-WT	ENSG00000071553	30	X:153664028-153664861	TE	0.5065
NHA-WT	ENSG00000071553	31	X:153664862-153664862	TE	0.5065
NHA-WT	ENSG00000071794	41	3:148749988-148750159	CE	0
NHA-WT	ENSG00000071794	42	3:148749151-148749987	RI	0
NHA-WT	ENSG00000071794	44	3:148748782-148749147	TE	0.6105
NHA-WT	ENSG00000071794	45	3:148748472-148748781	TE	0.6105
NHA-WT	ENSG00000071794	46	3:148747914-148748471	TE	0.6105
NHA-WT	ENSG00000071889	42	X:153735042-153735237	TE	0.3715
NHA-WT	ENSG00000071889	43	X:153734971-153735041	TE	0.3715
NHA-WT	ENSG00000071889	44	X:153734866-153734970	TE	0.3715
NHA-WT	ENSG00000071889	45	X:153734535-153734865	TE	0.3715
NHA-WT	ENSG00000071889	46	X:153734504-153734534	TE	0.3715
NHA-WT	ENSG00000071889	47	X:153734502-153734503	TE	0.3715
NHA-WT	ENSG00000071889	48	X:153734490-153734501	TE	0.3715
NHA-WT	ENSG00000071889	49	X:153733350-153734489	TE	0.3715
NHA-WT	ENSG00000071894	22	8:145624978-145625100	CE	0
NHA-WT	ENSG00000071894	23	8:145624894-145624977	RI	0
NHA-WT	ENSG00000071894	42	8:145621563-145621715	CE	0
NHA-WT	ENSG00000071894	51	8:145619932-145619976	TS	0
NHA-WT	ENSG00000071894	52	8:145619859-145619931	TS	0
NHA-WT	ENSG00000071894	53	8:145619711-145619770	AA	0
NHA-WT	ENSG00000071894	55	8:145619632-145619656	TS	0
NHA-WT	ENSG00000071894	56	8:145619594-145619631	TS	0
NHA-WT	ENSG00000071894	57	8:145619563-145619593	AD	0
NHA-WT	ENSG00000071894	58	8:145619516-145619562	RI	0
NHA-WT	ENSG00000071894	61	8:145619376-145619448	RI	0
NHA-WT	ENSG00000071894	62	8:145619328-145619375	CE	0
NHA-WT	ENSG00000071894	63	8:145619254-145619327	RI	0
NHA-WT	ENSG00000071894	64	8:145619098-145619253	CE	0
NHA-WT	ENSG00000071894	65	8:145619012-145619097	RI	0
NHA-WT	ENSG00000071994	20	6:170890880-170891353	TE	0.221967
NHA-WT	ENSG00000071994	21	6:170890835-170890879	TE	0.221967
NHA-WT	ENSG00000071994	22	6:170890833-170890834	TE	0.221967
NHA-WT	ENSG00000071994	23	6:170890177-170890832	TE	0.221967
NHA-WT	ENSG00000071994	31	6:170886682-170886805	TE	0
NHA-WT	ENSG00000071994	32	6:170886647-170886681	TE	0
NHA-WT	ENSG00000071994	33	6:170886524-170886646	TE	0
NHA-WT	ENSG00000071994	34	6:170884416-170886523	TE	0
NHA-WT	ENSG00000071994	35	6:170884383-170884415	TE	0
NHA-WT	ENSG00000072062	29	19:14202848-14203655	TE	0.267367
NHA-WT	ENSG00000072062	30	19:14202509-14202847	TE	0.267367
NHA-WT	ENSG00000072062	31	19:14202500-14202508	TE	0.267367
NHA-WT	ENSG00000072071	17	19:14270924-14271109	CE	0
NHA-WT	ENSG00000072071	37	19:14262020-14262427	TE	0.618033
[truncated: 82,168 more rows]

## Sheet: S10b (Diff. splicing WT v KO)
Supplemental Table S11: Alternative splicing events detected in NHA cell lines. b Results (Whippet.diff.jl output) of differential splicing events detected between NHA-CICWT line and NHA-CICKO lines. Significant splicing events events were those with absolute Delta Ψ > 0.1 and probability > 0.9.
Ensembl_id	gene_name	Node	Coord	Strand	Type	Psi_A	Psi_B	DeltaPsi	Probability	Complexity	Entropy	Signif	Direction
ENSG00000003249	DBNDD1	1	16:90086289-90086536	-	TS	0.088576	0.57078	-0.48221	0.995	K1	0.9756	TRUE	exclusion
ENSG00000003249	DBNDD1	2	16:90086136-90086288	-	TS	0.90669	0.4194	0.48729	0.998	K1	0.9756	TRUE	inclusion
ENSG00000003987	MTMR7	30	8:17156911-17157733	-	TE	0.0034573	0.18347	-0.18001	0.989	K1	0.9847	TRUE	exclusion
ENSG00000003987	MTMR7	31	8:17155539-17156910	-	TE	0.99654	0.81714	0.1794	0.992	K1	0.9847	TRUE	inclusion
ENSG00000004487	KDM1A	34	1:23409848-23410175	+	TE	0.025578	0.80689	-0.78131	0.912	K2	0.1436	TRUE	exclusion
ENSG00000004487	KDM1A	35	1:23410176-23410181	+	TE	0.95457	0.19027	0.7643	0.916	K2	0.1436	TRUE	inclusion
ENSG00000008283	CYB561	42	17:61511325-61511500	-	TE	0.36247	0.086749	0.27572	0.935	K4	2.2078	TRUE	inclusion
ENSG00000008283	CYB561	47	17:61510506-61510576	-	TE	0.11146	0.54062	-0.42916	0.986	K3	1.1475	TRUE	exclusion
ENSG00000008283	CYB561	48	17:61509668-61510505	-	TE	0.84867	0.44306	0.40561	0.976	K3	1.1475	TRUE	inclusion
ENSG00000009830	POMT2	1	14:77787204-77787227	-	TS	0.5421	0.13883	0.40327	0.974	K2	0.9953	TRUE	inclusion
ENSG00000009830	POMT2	2	14:77787048-77787203	-	TS	0.29008	0.8596	-0.56952	0.986	K2	0.9953	TRUE	exclusion
ENSG00000019582	CD74	26	5:149781427-149781567	-	TE	0.53636	0.091938	0.44442	0.99	K2	0.9945	TRUE	inclusion
ENSG00000019582	CD74	27	5:149781262-149781426	-	TE	0.47104	0.096747	0.37429	0.974	K2	0.9945	TRUE	inclusion
ENSG00000019582	CD74	29	5:149781200-149781232	-	TE	0.12832	0.74275	-0.61443	0.999	K2	0.9945	TRUE	exclusion
ENSG00000029153	ARNTL2	29	12:27573659-27573827	+	TE	0.50997	0.12655	0.38343	0.969	K3	1	TRUE	inclusion
ENSG00000029153	ARNTL2	30	12:27573828-27576241	+	TE	0.49782	0.87227	-0.37445	0.967	K3	1	TRUE	exclusion
ENSG00000034713	GABARAPL2	9	16:75611177-75611428	+	TE	0.37878	0.11317	0.26561	0.921	K1	0.9981	TRUE	inclusion
ENSG00000048052	HDAC9	84	7:19035821-19035966	+	TE	0.04216	0.17122	-0.12906	0.911	K3	1.9794	TRUE	exclusion
ENSG00000049618	ARID1B	2	6:157099064-157099085	+	TS	0.11717	0.89149	-0.77432	1	K2	0.8176	TRUE	exclusion
ENSG00000049618	ARID1B	3	6:157099086-157100566	+	TS	0.68512	0.10617	0.57895	0.997	K2	0.8176	TRUE	inclusion
ENSG00000058272	PPP1R12A	73	12:80167348-80168185	-	TE	0.12931	0.85094	-0.72163	1	K4	0.2414	TRUE	exclusion
ENSG00000058272	PPP1R12A	74	12:80167343-80167347	-	TE	0.87665	0.14715	0.7295	0.999	K4	0.2414	TRUE	inclusion
ENSG00000061273	HDAC7	92	12:48177421-48177433	-	TE	0.64936	0.19811	0.45124	0.907	K4	1.4266	TRUE	inclusion
ENSG00000062716	VMP1	50	17:57917533-57917568	+	TE	0.82756	0.11316	0.7144	1	K4	1.9137	TRUE	inclusion
ENSG00000063322	MED29	16	19:39890617-39891277	+	TE	0.37493	0.82522	-0.45029	0.943	K3	1.2914	TRUE	exclusion
ENSG00000064995	TAF11	6	6:34845750-34846497	-	TE	0.082737	0.56073	-0.478	0.917	K1	0.9649	TRUE	exclusion
ENSG00000064995	TAF11	7	6:34845555-34845749	-	TE	0.91593	0.4428	0.47313	0.936	K1	0.9649	TRUE	inclusion
ENSG00000065361	ERBB3	77	12:56496159-56496590	+	TE	0.50943	0.090562	0.41887	0.948	K3	1.9828	TRUE	inclusion
ENSG00000067113	PLPP1	14	5:54720713-54721162	-	TE	0.37349	0.10479	0.2687	0.921	K1	0.9786	TRUE	inclusion
ENSG00000067113	PLPP1	15	5:54720682-54720712	-	TE	0.62758	0.89501	-0.26743	0.909	K1	0.9786	TRUE	exclusion
ENSG00000067182	TNFRSF1A	5	12:6451171-6451193	-	TS	0.12338	0.88953	-0.76615	1	K3	0.6968	TRUE	exclusion
ENSG00000067182	TNFRSF1A	8	12:6450942-6451014	-	TS	0.79528	0.10851	0.68677	0.999	K3	0.6968	TRUE	inclusion
ENSG00000067840	PDZD4	24	X:153067623-153068741	-	TE	0.7281	0.11837	0.60973	0.999	K2	0.9651	TRUE	inclusion
ENSG00000068796	KIF2A	37	5:61681456-61681503	+	TE	0.10898	0.60638	-0.4974	0.97	K2	0.9969	TRUE	exclusion
ENSG00000068796	KIF2A	39	5:61681547-61682210	+	TE	0.82513	0.39492	0.43021	0.93	K2	0.9969	TRUE	inclusion
ENSG00000068885	IFT80	3	3:160117321-160117321	-	TS	0.36466	0.077099	0.28756	0.942	K3	0.9971	TRUE	inclusion
ENSG00000068885	IFT80	5	3:160117188-160117308	-	TS	0.63616	0.92254	-0.28638	0.923	K3	0.9971	TRUE	exclusion
ENSG00000069849	ATP1B3	25	3:141644828-141645024	+	TE	0.65034	0.13355	0.51679	0.993	K3	1.2003	TRUE	inclusion
ENSG00000069849	ATP1B3	26	3:141645025-141645323	+	TE	0.22598	0.86045	-0.63446	0.998	K3	1.2003	TRUE	exclusion
ENSG00000070010	UFD1	32	22:19438144-19438147	-	TE	0.084137	0.71887	-0.63473	0.911	K2	0.1475	TRUE	exclusion
ENSG00000070010	UFD1	34	22:19437433-19437463	-	TE	0.91963	0.28268	0.63695	0.905	K2	0.1475	TRUE	inclusion
ENSG00000070366	SMG6	55	17:1964668-1964698	-	TE	0.63704	0.074559	0.56248	1	K4	1.4035	TRUE	inclusion
ENSG00000070366	SMG6	56	17:1963170-1964667	-	TE	0.13562	0.65166	-0.51604	0.948	K4	1.4035	TRUE	exclusion
ENSG00000070778	PTPN21	33	14:88934114-88934298	-	TE	0.096704	0.52163	-0.42493	0.984	K2	1.6795	TRUE	exclusion
ENSG00000070778	PTPN21	34	14:88932125-88934113	-	TE	0.80264	0.29131	0.51133	0.981	K2	1.6795	TRUE	inclusion
ENSG00000071082	RPL31	4	2:101618755-101618772	+	TS	0.13691	0.89271	-0.7558	0.999	K3	0.0201	TRUE	exclusion
ENSG00000071082	RPL31	5	2:101618773-101618777	+	TS	0.87277	0.10667	0.76611	0.999	K3	0.0201	TRUE	inclusion
ENSG00000071082	RPL31	19	2:101622882-101622885	+	TE	0.26918	0.85319	-0.58401	0.938	K3	1.8585	TRUE	exclusion
ENSG00000071553	ATP6AP1	2	X:153656991-153657008	+	TS	0.081706	0.85078	-0.76907	1	K3	0.7887	TRUE	exclusion
ENSG00000071553	ATP6AP1	8	X:153657191-153657199	+	TS	0.71711	0.10374	0.61337	1	K3	0.7887	TRUE	inclusion
ENSG00000072195	SPEG	98	2:220357476-220358315	+	TE	0.07485	0.88057	-0.80572	1	K1	0	TRUE	exclusion
ENSG00000072195	SPEG	99	2:220358316-220358354	+	TE	0.92184	0.11943	0.80241	1	K1	0	TRUE	inclusion
ENSG00000072310	SREBF1	2	17:17740302-17740316	-	TS	0.11088	0.8885	-0.77762	1	K2	0	TRUE	exclusion
ENSG00000072310	SREBF1	3	17:17740132-17740301	-	TS	0.89142	0.11745	0.77397	1	K2	0	TRUE	inclusion
ENSG00000073803	MAP3K13	44	3:185200538-185200599	+	TE	0.0077146	0.15214	-0.14442	0.933	K3	1.4495	TRUE	exclusion
ENSG00000074800	ENO1	3	1:8938736-8938747	-	TS	0.88388	0.11736	0.76651	1	K2	0.009	TRUE	inclusion
ENSG00000074800	ENO1	4	1:8938639-8938735	-	TS	0.12105	0.88241	-0.76136	1	K2	0.009	TRUE	exclusion
ENSG00000075073	TACR2	7	10:71163659-71164239	-	TE	0.83848	0.96829	-0.12981	0.907	K1	0.8213	TRUE	exclusion
ENSG00000075142	SRI	27	7:87834973-87835600	-	TE	0.69794	0.12018	0.57776	0.997	K3	0.9615	TRUE	inclusion
ENSG00000075407	ZNF37A	14	10:38406318-38412276	+	TE	0.72361	0.27624	0.44737	0.972	K1	0.8937	TRUE	inclusion
ENSG00000075407	ZNF37A	15	10:38412277-38414472	+	TE	0.27806	0.72206	-0.444	0.968	K1	0.8937	TRUE	exclusion
ENSG00000077713	SLC25A43	12	X:118586918-118587145	+	TE	0.088236	0.45831	-0.37007	0.98	K2	1.0015	TRUE	exclusion
ENSG00000077713	SLC25A43	14	X:118587184-118588435	+	TE	0.90724	0.53976	0.36748	0.985	K2	1.0015	TRUE	inclusion
ENSG00000079332	SAR1A	24	10:71909979-71911134	-	TE	0.59523	0.13226	0.46297	0.98	K2	0.957	TRUE	inclusion
ENSG00000079332	SAR1A	26	10:71907045-71909959	-	TE	0.4173	0.85977	-0.44247	0.981	K2	0.957	TRUE	exclusion
ENSG00000079805	DNM2	66	19:10942101-10942560	+	TE	0.090904	0.89485	-0.80394	1	K3	0.1542	TRUE	exclusion
ENSG00000079805	DNM2	67	19:10942561-10942571	+	TE	0.88425	0.10247	0.78177	1	K3	0.1542	TRUE	inclusion
ENSG00000079999	KEAP1	1	19:10614235-10614417	-	TS	0.10752	0.64729	-0.53977	0.992	K1	0.959	TRUE	exclusion
ENSG00000079999	KEAP1	2	19:10613917-10614234	-	TS	0.89563	0.34668	0.54895	0.995	K1	0.959	TRUE	inclusion
ENSG00000082153	BZW1	36	2:201687274-201687961	+	TE	0.10806	0.44783	-0.33978	0.963	K2	1.5618	TRUE	exclusion
ENSG00000082153	BZW1	37	2:201687962-201688569	+	TE	0.89102	0.38429	0.50674	0.992	K2	1.5618	TRUE	inclusion
ENSG00000082805	ERC1	63	12:1600734-1601653	+	TE	0.092527	0.35784	-0.26531	0.92	K3	1.7411	TRUE	exclusion
ENSG00000083223	TUT7	37	9:88902874-88903659	-	TE	0.89881	0.12003	0.77878	1	K2	0.4474	TRUE	inclusion
ENSG00000083223	TUT7	38	9:88902650-88902873	-	TE	0.1024	0.84941	-0.747	1	K2	0.4474	TRUE	exclusion
ENSG00000086015	MAST2	47	1:46500501-46501738	+	TE	0.90977	0.19537	0.7144	0.907	K1	0.0001	TRUE	inclusion
ENSG00000086015	MAST2	48	1:46501739-46501796	+	TE	0.091655	0.80528	-0.71362	0.924	K1	0.0001	TRUE	exclusion
ENSG00000087274	ADD1	62	4:2929898-2930018	+	TE	0.13838	0.87469	-0.73631	1	K3	0.1797	TRUE	exclusion
ENSG00000087274	ADD1	66	4:2930251-2930287	+	TE	0.86545	0.11633	0.74911	1	K3	0.1797	TRUE	inclusion
ENSG00000087448	KLHL42	2	12:27932981-27933799	+	TS	0.11763	0.39804	-0.28041	0.92	K2	0.9478	TRUE	exclusion
ENSG00000087448	KLHL42	3	12:27933800-27934135	+	TS	0.69043	0.12917	0.56126	0.992	K2	0.9478	TRUE	inclusion
ENSG00000087460	GNAS	1	20:57414773-57414802	+	TS	0.41296	0.10003	0.31293	0.955	K2	1.5642	TRUE	inclusion
ENSG00000089050	RBBP9	7	20:18470103-18470634	-	TE	0.12304	0.70874	-0.5857	0.997	K2	0.7704	TRUE	exclusion
ENSG00000089050	RBBP9	9	20:18467184-18469931	-	TE	0.87842	0.3021	0.57632	0.992	K2	0.7704	TRUE	inclusion
ENSG00000091947	TMEM101	20	17:42088958-42089604	-	TE	0.13161	0.71222	-0.58061	0.993	K2	0.7451	TRUE	exclusion
ENSG00000092036	HAUS4	13	14:23426260-23426270	-	TS	0.92269	0.19497	0.72772	1	K4	2.8078	TRUE	inclusion
ENSG00000099866	MADCAM1	8	19:504966-505342	+	TE	0.83281	0.089218	0.74359	0.999	K2	0.5116	TRUE	inclusion
ENSG00000099866	MADCAM1	9	19:505343-505347	+	TE	0.13175	0.86365	-0.7319	0.999	K2	0.5116	TRUE	exclusion
ENSG00000100034	PPM1F	8	22:22292949-22292956	-	TS	0.35111	0.86617	-0.51505	0.993	K2	0.8909	TRUE	exclusion
ENSG00000100034	PPM1F	9	22:22292935-22292948	-	TS	0.64268	0.13494	0.50775	0.986	K2	0.8909	TRUE	inclusion
ENSG00000100105	PATZ1	11	22:31721795-31723295	-	TE	0.85044	0.086827	0.76362	1	K1	0.0401	TRUE	inclusion
ENSG00000100105	PATZ1	12	22:31721790-31721794	-	TE	0.15048	0.90706	-0.75657	1	K1	0.0401	TRUE	exclusion
ENSG00000100196	KDELR3	8	22:38878501-38878927	+	TE	0.018774	0.13196	-0.11318	0.939	K1	0.843	TRUE	exclusion
ENSG00000100196	KDELR3	9	22:38878928-38879452	+	TE	0.98149	0.86779	0.1137	0.943	K1	0.843	TRUE	inclusion
ENSG00000100209	HSCB	2	22:29138030-29138042	+	TS	0.083188	0.86104	-0.77785	1	K3	0.4506	TRUE	exclusion
ENSG00000100209	HSCB	5	22:29138139-29138319	+	TS	0.84193	0.13768	0.70425	1	K3	0.4506	TRUE	inclusion
ENSG00000100226	GTPBP1	39	22:39132034-39132180	+	TE	0.14478	0.46518	-0.3204	0.915	K1	0.9839	TRUE	exclusion
ENSG00000100242	SUN2	38	22:39138444-39138486	-	TS	0.47946	0.093308	0.38615	0.952	K1	0.9924	TRUE	inclusion
ENSG00000100242	SUN2	39	22:39138306-39138443	-	TS	0.52375	0.90506	-0.38131	0.952	K1	0.9924	TRUE	exclusion
ENSG00000100296	THOC5	53	22:29904316-29904317	-	TE	0.80844	0.11405	0.69439	0.999	K3	0.7225	TRUE	inclusion
ENSG00000100296	THOC5	55	22:29901868-29904156	-	TE	0.1015	0.88617	-0.78466	1	K3	0.7225	TRUE	exclusion
ENSG00000100348	TXN2	13	22:36863596-36863637	-	TE	0.061074	0.37639	-0.31532	0.944	K3	0.9976	TRUE	exclusion
ENSG00000100348	TXN2	15	22:36863083-36863092	-	TE	0.93987	0.22953	0.71034	0.995	K3	0.9976	TRUE	inclusion
ENSG00000100413	POLR3H	25	22:41921830-41924845	-	TE	0.68402	0.30693	0.37709	0.965	K3	1.0115	TRUE	inclusion
ENSG00000100558	PLEK2	20	14:67853704-67854104	-	TE	0.88857	0.11039	0.77818	1	K2	0	TRUE	inclusion
ENSG00000100558	PLEK2	21	14:67853700-67853703	-	TE	0.11516	0.88611	-0.77096	1	K2	0	TRUE	exclusion
ENSG00000100568	VTI1B	2	14:68141328-68141537	-	TS	0.10078	0.85615	-0.75537	1	K2	0	TRUE	exclusion
ENSG00000100568	VTI1B	3	14:68141092-68141327	-	TS	0.896	0.13844	0.75756	1	K2	0	TRUE	inclusion
ENSG00000100802	C14orf93	45	14:23456354-23456423	-	TE	0.52676	0.10497	0.42179	0.979	K3	1.0633	TRUE	inclusion
ENSG00000100815	TRIP11	2	14:92506362-92506403	-	TS	0.92648	0.24527	0.68121	0.993	K1	0.9951	TRUE	inclusion
ENSG00000100815	TRIP11	3	14:92505891-92506361	-	TS	0.072822	0.75047	-0.67765	0.991	K1	0.9951	TRUE	exclusion
ENSG00000100918	REC8	5	14:24641491-24641574	+	TS	0.49581	0.23048	0.26533	0.908	K3	0.9998	TRUE	inclusion
ENSG00000101224	CDC25B	33	20:3785866-3785884	+	TE	0.58827	0.11581	0.47246	0.993	K3	0.9704	TRUE	inclusion
ENSG00000101224	CDC25B	35	20:3786148-3786762	+	TE	0.40667	0.80373	-0.39706	0.962	K3	0.9704	TRUE	exclusion
ENSG00000101440	ASIP	4	20:32856797-32856982	+	TE	0.51183	0.13756	0.37427	0.966	K1	0.9991	TRUE	inclusion
ENSG00000101440	ASIP	5	20:32856983-32857150	+	TE	0.48415	0.86745	-0.3833	0.964	K1	0.9991	TRUE	exclusion
ENSG00000101773	RBBP8	3	18:20494084-20494085	+	TS	0.13189	0.85971	-0.72782	0.998	K2	0	TRUE	exclusion
ENSG00000101773	RBBP8	4	18:20494086-20494101	+	TS	0.87134	0.14369	0.72765	1	K2	0	TRUE	inclusion
ENSG00000102572	STK24	21	13:99108236-99108814	-	TE	0.35515	0.097458	0.25769	0.936	K1	0.8896	TRUE	inclusion
ENSG00000102572	STK24	22	13:99107675-99108235	-	TE	0.6489	0.90256	-0.25366	0.929	K1	0.8896	TRUE	exclusion
ENSG00000102683	SGCG	12	13:23898507-23898680	+	TE	0.78748	0.12295	0.66453	0.995	K2	0.461	TRUE	inclusion
ENSG00000102683	SGCG	14	13:23899081-23899304	+	TE	0.21351	0.88521	-0.6717	0.999	K2	0.461	TRUE	exclusion
ENSG00000102977	ACD	3	16:67694185-67694206	-	TS	0.85785	0.093793	0.76406	1	K4	0.5543	TRUE	inclusion
ENSG00000102977	ACD	9	16:67694025-67694117	-	TS	0.061576	0.89532	-0.83374	1	K4	0.5543	TRUE	exclusion
ENSG00000102981	PARD6A	8	16:67695799-67696633	+	TE	0.13328	0.89484	-0.76156	1	K2	0.0047	TRUE	exclusion
ENSG00000102981	PARD6A	9	16:67696634-67696677	+	TE	0.86821	0.10712	0.7611	1	K2	0.0047	TRUE	inclusion
ENSG00000102984	ZNF821	42	16:71893679-71893709	-	TE	0.66459	0.077563	0.58703	0.977	K4	1.7633	TRUE	inclusion
ENSG00000103034	NDRG4	115	16:58546005-58547314	+	TE	0.32587	0.79219	-0.46632	0.929	K3	1.4994	TRUE	exclusion
ENSG00000103534	TMC5	42	16:19509541-19509599	+	TE	0.44837	0.093625	0.35474	0.953	K2	0.9091	TRUE	inclusion
ENSG00000103534	TMC5	43	16:19509600-19510435	+	TE	0.55114	0.91044	-0.35929	0.937	K2	0.9091	TRUE	exclusion
ENSG00000103591	AAGAB	23	15:67494011-67494044	-	TE	0.35335	0.13255	0.2208	0.911	K2	0.9272	TRUE	inclusion
ENSG00000103591	AAGAB	24	15:67493371-67494010	-	TE	0.64069	0.86955	-0.22886	0.937	K2	0.9272	TRUE	exclusion
ENSG00000103852	TTC23	53	15:99676611-99677757	-	TE	0.71665	0.11248	0.60416	0.957	K3	1.6713	TRUE	inclusion
ENSG00000104133	SPG11	95	15:44854895-44855051	-	TE	0.45078	0.58222	-0.13144	0.902	K2	1.6257	TRUE	exclusion
ENSG00000104147	OIP5	6	15:41601960-41602047	-	TE	0.88946	0.10295	0.7865	1	K1	0.0638	TRUE	inclusion
ENSG00000104147	OIP5	7	15:41601466-41601959	-	TE	0.10966	0.89853	-0.78887	1	K1	0.0638	TRUE	exclusion
ENSG00000104341	LAPTM4B	1	8:98787285-98788003	+	TS	0.74647	0.090538	0.65593	0.999	K2	0.8202	TRUE	inclusion
ENSG00000104432	IL7	4	8:79717164-79717355	-	TS	0.20404	0.83627	-0.63223	0.964	K3	0.9684	TRUE	exclusion
ENSG00000104892	KLC3	26	19:45854544-45854773	+	TE	0.0062645	0.9866	-0.98034	1	K1	0	TRUE	exclusion
ENSG00000104892	KLC3	27	19:45854774-45854778	+	TE	0.9939	0.013447	0.98046	1	K1	0	TRUE	inclusion
ENSG00000105185	PDCD5	18	19:33078294-33078320	+	TE	0.090659	0.36094	-0.27028	0.957	K3	1.4758	TRUE	exclusion
ENSG00000105519	CAPS	5	19:5914283-5914283	+	TS	0.97253	0.57233	0.4002	0.908	K3	1.0211	TRUE	inclusion
ENSG00000105677	TMEM147	7	19:36036560-36036575	+	TS	0.42165	0.76816	-0.34651	0.944	K4	0.9763	TRUE	exclusion
ENSG00000105677	TMEM147	9	19:36036583-36036718	+	TS	0.57192	0.10664	0.46528	0.995	K4	0.9763	TRUE	inclusion
ENSG00000105877	DNAH11	100	7:21940625-21940734	+	TE	0.50743	0.74092	-0.23349	0.977	K1	0.9978	TRUE	exclusion
ENSG00000105877	DNAH11	101	7:21940735-21941457	+	TE	0.49269	0.25936	0.23333	0.963	K1	0.9978	TRUE	inclusion
ENSG00000105926	MPP6	29	7:24729160-24733812	+	TE	0.89445	0.25385	0.6406	0.997	K2	0.8778	TRUE	inclusion
ENSG00000105939	ZC3HAV1	1	7:138794395-138794465	-	TS	0.62235	0.13571	0.48663	0.986	K2	0.9681	TRUE	inclusion
ENSG00000105939	ZC3HAV1	3	7:138793770-138794100	-	TS	0.14834	0.57726	-0.42892	0.961	K2	0.9681	TRUE	exclusion
ENSG00000105971	CAV2	45	7:116146163-116146407	+	TE	0.76703	0.13185	0.63519	0.997	K3	0.5659	TRUE	inclusion
ENSG00000105971	CAV2	47	7:116146609-116148595	+	TE	0.23516	0.86549	-0.63033	0.999	K3	0.5659	TRUE	exclusion
ENSG00000106009	BRAT1	29	7:2577515-2578045	-	TE	0.76806	0.092719	0.67535	0.981	K2	0.9823	TRUE	inclusion
ENSG00000106009	BRAT1	30	7:2577511-2577514	-	TE	0.058474	0.90675	-0.84828	1	K2	0.9823	TRUE	exclusion
ENSG00000106258	CYP3A5	20	7:99268845-99269393	-	TE	0.10419	0.55849	-0.45429	0.972	K1	0.991	TRUE	exclusion
ENSG00000106258	CYP3A5	21	7:99268533-99268844	-	TE	0.89464	0.4375	0.45714	0.955	K1	0.991	TRUE	inclusion
ENSG00000108255	CRYBA1	7	17:27581220-27581501	+	TE	0.86073	0.094559	0.76617	1	K1	0	TRUE	inclusion
ENSG00000108255	CRYBA1	8	17:27581502-27581512	+	TE	0.1378	0.90765	-0.76985	1	K1	0	TRUE	exclusion
ENSG00000108786	HSD17B1	14	17:40706687-40707111	+	TE	0.58042	0.12453	0.45588	0.993	K1	0.9712	TRUE	inclusion
ENSG00000108786	HSD17B1	15	17:40707112-40707231	+	TE	0.41939	0.89091	-0.47153	0.995	K1	0.9712	TRUE	exclusion
ENSG00000108950	FAM20A	23	17:66533264-66533757	-	TE	0.18465	0.021402	0.16325	0.952	K3	0.8896	TRUE	inclusion
ENSG00000108961	RANGRF	5	17:8192017-8192183	+	TS	0.54052	0.12069	0.41983	0.988	K3	1.1279	TRUE	inclusion
ENSG00000108961	RANGRF	14	17:8193131-8193259	+	TE	0.090709	0.7241	-0.63339	1	K2	0.8013	TRUE	exclusion
ENSG00000108961	RANGRF	16	17:8193409-8193410	+	TE	0.91358	0.27411	0.63947	1	K2	0.8013	TRUE	inclusion
ENSG00000109586	GALNT7	1	4:174089904-174089961	+	TS	0.46599	0.06865	0.39734	0.995	K1	0.9947	TRUE	inclusion
ENSG00000109586	GALNT7	2	4:174089962-174090112	+	TS	0.53032	0.93098	-0.40066	0.986	K1	0.9947	TRUE	exclusion
ENSG00000110063	DCPS	8	11:126215242-126215611	+	TE	0.90028	0.11681	0.78347	1	K1	0	TRUE	inclusion
ENSG00000110063	DCPS	9	11:126215612-126215644	+	TE	0.10332	0.87853	-0.7752	1	K1	0	TRUE	exclusion
ENSG00000111364	DDX55	43	12:124104692-124104969	+	TE	0.10089	0.36861	-0.26772	0.943	K2	1.3998	TRUE	exclusion
ENSG00000111405	ENDOU	15	12:48104237-48104702	-	TE	0.74917	0.1795	0.56968	0.971	K2	0.9334	TRUE	inclusion
ENSG00000111669	TPI1	26	12:6979993-6980112	+	TE	0.16325	0.71067	-0.54742	0.938	K2	1.513	TRUE	exclusion
ENSG00000111725	PRKAB1	15	12:120115160-120116789	+	TS	0.5135	0.12738	0.38612	0.976	K1	0.9994	TRUE	inclusion
ENSG00000111725	PRKAB1	16	12:120116790-120117307	+	TS	0.49392	0.87155	-0.37763	0.96	K1	0.9994	TRUE	exclusion
ENSG00000112078	KCTD20	26	6:36455874-36458154	+	TE	0.4797	0.083613	0.39609	0.936	K3	1.6331	TRUE	inclusion
ENSG00000112078	KCTD20	27	6:36458155-36458920	+	TE	0.37719	0.76918	-0.392	0.925	K3	1.6331	TRUE	exclusion
ENSG00000112200	ZNF451	52	6:57035000-57035105	+	TE	0.89774	0.3655	0.53224	0.93	K2	0.9624	TRUE	inclusion
ENSG00000112237	CCNC	43	6:99991351-99991485	-	TE	0.022825	0.41885	-0.39603	0.913	K3	1.54	TRUE	exclusion
ENSG00000112473	SLC39A7	2	6:33168603-33168649	+	TS	0.52313	0.026299	0.49683	0.925	K2	0.8717	TRUE	inclusion
ENSG00000112473	SLC39A7	3	6:33168650-33168715	+	TS	0.47675	0.97393	-0.49718	0.906	K2	0.8717	TRUE	exclusion
ENSG00000113161	HMGCR	41	5:74656113-74656306	+	TE	0.72663	0.099783	0.62684	1	K3	1.0675	TRUE	inclusion
ENSG00000113328	CCNG1	39	5:162871488-162871971	+	TE	0.14773	0.68809	-0.54036	0.919	K2	0.8654	TRUE	exclusion
ENSG00000113328	CCNG1	40	5:162871972-162872020	+	TE	0.85947	0.3147	0.54477	0.949	K2	0.8654	TRUE	inclusion
ENSG00000113441	LNPEP	27	5:96364106-96364740	+	TE	0.13999	0.67501	-0.53502	0.99	K1	0.8381	TRUE	exclusion
ENSG00000113441	LNPEP	28	5:96364741-96373219	+	TE	0.86656	0.33432	0.53224	0.992	K1	0.8381	TRUE	inclusion
ENSG00000113851	CRBN	33	3:3191695-3192543	-	TE	0.0050372	0.135	-0.12996	1	K2	1.5159	TRUE	exclusion
ENSG00000114745	GORASP1	3	3:39149130-39149131	-	TS	0.85614	0.22522	0.63093	0.987	K4	1.1355	TRUE	inclusion
ENSG00000114779	ABHD14B	20	3:52002569-52003099	-	TE	0.88328	0.13018	0.75309	1	K3	0	TRUE	inclusion
ENSG00000114779	ABHD14B	21	3:52002546-52002568	-	TE	0.12245	0.86295	-0.7405	0.999	K3	0	TRUE	exclusion
ENSG00000114999	TTL	12	2:113286258-113289988	+	TE	0.14099	0.76426	-0.62327	0.998	K1	0.6133	TRUE	exclusion
ENSG00000114999	TTL	13	2:113289989-113299316	+	TE	0.85785	0.24095	0.61689	0.997	K1	0.6133	TRUE	inclusion
ENSG00000115042	FAHD2A	20	2:96078643-96078844	+	TE	0.88833	0.098526	0.78981	1	K1	0.2608	TRUE	inclusion
ENSG00000115042	FAHD2A	21	2:96078845-96082364	+	TE	0.11295	0.90339	-0.79044	1	K1	0.2608	TRUE	exclusion
ENSG00000115211	EIF2B4	39	2:27587266-27587466	-	TE	0.87886	0.25939	0.61948	1	K3	0.7373	TRUE	inclusion
ENSG00000115211	EIF2B4	40	2:27587248-27587265	-	TE	0.12322	0.74851	-0.62529	0.997	K3	0.7373	TRUE	exclusion
ENSG00000115317	HTRA2	2	2:74756852-74756901	+	TS	0.71445	0.21636	0.49809	0.919	K2	0.9795	TRUE	inclusion
ENSG00000115317	HTRA2	4	2:74756949-74757039	+	TS	0.28767	0.7841	-0.49642	0.904	K2	0.9795	TRUE	exclusion
ENSG00000115318	LOXL3	29	2:74759731-74760256	-	TE	0.79326	0.60819	0.18507	0.913	K3	1.5208	TRUE	inclusion
ENSG00000115540	MOB4	16	2:198415489-198415540	+	TE	0.45284	0.10642	0.34642	0.958	K3	1.8288	TRUE	inclusion
ENSG00000115541	HSPE1	2	2:198364864-198365072	+	TS	0.49535	0.09532	0.40003	0.987	K3	1.0486	TRUE	inclusion
ENSG00000116497	S100PBP	11	1:33283300-33283338	+	TS	0.10944	0.77441	-0.66497	1	K1	0.4984	TRUE	exclusion
ENSG00000116497	S100PBP	12	1:33283339-33283447	+	TS	0.88838	0.21229	0.67609	1	K1	0.4984	TRUE	inclusion
ENSG00000117153	KLHL12	15	1:202861533-202861787	-	TE	0.47337	0.11256	0.3608	0.919	K2	0.9993	TRUE	inclusion
ENSG00000117153	KLHL12	16	1:202860244-202861532	-	TE	0.5284	0.88737	-0.35896	0.919	K2	0.9993	TRUE	exclusion
ENSG00000117410	ATP6V0B	34	1:44443696-44443885	+	TE	0.11926	0.43374	-0.31449	0.941	K3	0.9742	TRUE	exclusion
ENSG00000117410	ATP6V0B	35	1:44443886-44443961	+	TE	0.88039	0.56271	0.31768	0.939	K3	0.9742	TRUE	inclusion
ENSG00000117411	B4GALT2	20	1:44455970-44456151	+	TE	0.71234	0.13207	0.58027	0.997	K2	0.8893	TRUE	inclusion
ENSG00000117411	B4GALT2	21	1:44456152-44456839	+	TE	0.26696	0.78063	-0.51367	0.989	K2	0.8893	TRUE	exclusion
ENSG00000117500	TMED5	12	1:93619789-93620445	-	TE	0.2284	0.019203	0.2092	0.964	K2	0.934	TRUE	inclusion
ENSG00000117500	TMED5	15	1:93615299-93617414	-	TE	0.77205	0.97036	-0.19831	0.915	K2	0.934	TRUE	exclusion
ENSG00000117682	DHDDS	55	1:26795865-26795930	+	TE	0.37999	0.08612	0.29387	0.93	K2	0.9886	TRUE	inclusion
ENSG00000117682	DHDDS	56	1:26795931-26797785	+	TE	0.62085	0.91326	-0.29241	0.944	K2	0.9886	TRUE	exclusion
ENSG00000117713	ARID1A	1	1:27022524-27022894	+	TS	0.83342	0.31323	0.52019	0.933	K1	0.9623	TRUE	inclusion
ENSG00000117713	ARID1A	2	1:27022895-27024031	+	TS	0.17336	0.68693	-0.51357	0.934	K1	0.9623	TRUE	exclusion
ENSG00000117899	MESD	15	15:81241017-81241239	-	TE	0.65498	0.38122	0.27377	0.923	K2	1.5831	TRUE	inclusion
ENSG00000118564	FBXL5	39	4:15606631-15607422	-	TE	0.89482	0.11925	0.77557	1	K2	0.0893	TRUE	inclusion
ENSG00000118564	FBXL5	41	4:15606162-15606628	-	TE	0.089926	0.88525	-0.79532	1	K2	0.0893	TRUE	exclusion
ENSG00000119471	HSDL2	19	9:115232712-115232935	+	TE	0.37372	0.038451	0.33527	0.921	K2	0.9408	TRUE	inclusion
ENSG00000119608	PROX2	8	14:75321835-75322005	-	TE	0.45448	0.055851	0.39863	0.917	K2	1.2675	TRUE	inclusion
ENSG00000119711	ALDH6A1	27	14:74523553-74526949	-	TE	0.94896	0.58578	0.36317	0.93	K2	1.0337	TRUE	inclusion
ENSG00000120278	PLEKHG1	26	6:151162975-151163192	+	TE	0.56299	0.18671	0.37627	0.936	K1	0.9799	TRUE	inclusion
ENSG00000120278	PLEKHG1	27	6:151163193-151164799	+	TE	0.43426	0.81406	-0.3798	0.926	K1	0.9799	TRUE	exclusion
ENSG00000120526	NUDCD1	1	8:110346348-110346614	-	TS	0.50137	0.067399	0.43398	0.993	K1	0.9999	TRUE	inclusion
ENSG00000120526	NUDCD1	2	8:110346122-110346347	-	TS	0.4967	0.93268	-0.43599	0.998	K1	0.9999	TRUE	exclusion
ENSG00000121310	ECHDC2	11	1:53387376-53387376	-	TS	0.25589	0.088766	0.16712	0.915	K4	1	TRUE	inclusion
ENSG00000121310	ECHDC2	13	1:53387225-53387258	-	TS	0.055515	0.50134	-0.44582	1	K4	1	TRUE	exclusion
ENSG00000121486	TRMT1L	23	1:185089185-185089403	-	TE	0.1337	0.45705	-0.32336	0.941	K2	0.9902	TRUE	exclusion
ENSG00000121486	TRMT1L	25	1:185087220-185087229	-	TE	0.86671	0.54315	0.32356	0.953	K2	0.9902	TRUE	inclusion
ENSG00000121579	NAA50	22	3:113439777-113440275	-	TE	0.12753	0.64907	-0.52154	0.987	K3	0.9921	TRUE	exclusion
ENSG00000121579	NAA50	23	3:113439162-113439776	-	TE	0.52634	0.11926	0.40708	0.978	K3	0.9921	TRUE	inclusion
ENSG00000122566	HNRNPA2B1	26	7:26229745-26229923	-	TE	0.57623	0.10636	0.46986	0.979	K2	1.4408	TRUE	inclusion
ENSG00000122642	FKBP9	41	7:33046184-33046456	+	TE	0.88536	0.57383	0.31153	0.937	K1	0.9603	TRUE	inclusion
ENSG00000122642	FKBP9	42	7:33046457-33046543	+	TE	0.11535	0.41776	-0.30241	0.95	K1	0.9603	TRUE	exclusion
ENSG00000123552	USP45	42	6:99883420-99883722	-	TE	0.012677	0.21398	-0.20131	0.975	K3	1.7638	TRUE	exclusion
ENSG00000123989	CHPF	1	2:220408296-220408509	-	TS	0.67442	0.28136	0.39305	0.965	K1	0.806	TRUE	inclusion
ENSG00000123989	CHPF	2	2:220407947-220408295	-	TS	0.316	0.71722	-0.40122	0.972	K1	0.806	TRUE	exclusion
ENSG00000125319	HROB	18	17:42239654-42239844	+	TE	0.17812	0.71997	-0.54185	0.924	K2	0.7243	TRUE	exclusion
ENSG00000125740	FOSB	14	19:45974560-45975325	+	TE	0.12918	0.86976	-0.74057	1	K1	0	TRUE	exclusion
ENSG00000125740	FOSB	15	19:45975326-45975339	+	TE	0.87086	0.12912	0.74174	1	K1	0	TRUE	inclusion
ENSG00000126456	IRF3	43	19:50165796-50165841	-	TE	0.70022	0.11247	0.58775	0.996	K2	1.0141	TRUE	inclusion
ENSG00000126456	IRF3	45	19:50165684-50165710	-	TE	0.2085	0.67108	-0.46258	0.985	K2	1.0141	TRUE	exclusion
ENSG00000126861	OMG	5	17:29621665-29623355	-	TE	0.28433	0.10033	0.184	0.976	K1	0.9476	TRUE	inclusion
ENSG00000126861	OMG	6	17:29621593-29621664	-	TE	0.71642	0.90024	-0.18382	0.981	K1	0.9476	TRUE	exclusion
ENSG00000126878	AIF1L	26	9:133996498-133996990	+	TE	0.56615	0.091526	0.47463	0.999	K2	0.9918	TRUE	inclusion
ENSG00000126878	AIF1L	27	9:133996991-133998532	+	TE	0.43392	0.90542	-0.4715	0.993	K2	0.9918	TRUE	exclusion
ENSG00000127314	RAP1B	53	12:69050145-69050178	+	TE	0.11175	0.49754	-0.38579	0.977	K2	1	TRUE	exclusion
ENSG00000127314	RAP1B	54	12:69050179-69050193	+	TE	0.8866	0.50318	0.38342	0.977	K2	1	TRUE	inclusion
ENSG00000127463	EMC1	52	1:19544642-19545438	-	TE	0.015301	0.13496	-0.11966	0.948	K3	1.6625	TRUE	exclusion
ENSG00000127914	AKAP9	79	7:91739983-91739987	+	TE	0.28175	0.91971	-0.63796	0.959	K2	0.8831	TRUE	exclusion
ENSG00000127948	POR	72	7:75616151-75616172	+	TE	0.87418	0.20052	0.67366	0.997	K3	1.3195	TRUE	inclusion
ENSG00000127954	STEAP4	9	7:87907343-87908943	-	TE	0.7439	0.33886	0.40504	0.933	K1	0.9516	TRUE	inclusion
ENSG00000127954	STEAP4	10	7:87905744-87907342	-	TE	0.25518	0.65691	-0.40174	0.932	K1	0.9516	TRUE	exclusion
ENSG00000128567	PODXL	29	7:131188890-131189267	-	TE	0.25133	0.028391	0.22293	0.924	K2	1.4816	TRUE	inclusion
ENSG00000128567	PODXL	32	7:131185021-131185022	-	TE	0.23979	0.75907	-0.51928	0.902	K2	1.4816	TRUE	exclusion
ENSG00000128591	FLNC	1	7:128470431-128470479	+	TS	0.88807	0.36817	0.5199	0.924	K1	0.9414	TRUE	inclusion
ENSG00000128591	FLNC	2	7:128470480-128471043	+	TS	0.11353	0.63058	-0.51705	0.948	K1	0.9414	TRUE	exclusion
ENSG00000128609	NDUFA5	22	7:123181891-123181911	-	TE	0.63739	0.21594	0.42145	0.913	K3	0.9943	TRUE	inclusion
ENSG00000128829	EIF2AK4	55	15:40327683-40327791	+	TE	0.034245	0.20991	-0.17567	0.947	K2	1.0033	TRUE	exclusion
ENSG00000129128	SPCS3	1	4:177241115-177241141	+	TS	0.11054	0.86674	-0.7562	0.999	K2	0.9993	TRUE	exclusion
ENSG00000129255	MPDU1	51	17:7491004-7491014	+	TE	0.06969	0.26282	-0.19313	0.908	K4	1.418	TRUE	exclusion
ENSG00000129255	MPDU1	53	17:7491109-7491135	+	TE	0.071509	0.54581	-0.4743	0.998	K4	1.418	TRUE	exclusion
ENSG00000129255	MPDU1	54	17:7491136-7491256	+	TE	0.070826	0.28742	-0.2166	0.923	K4	1.418	TRUE	exclusion
ENSG00000129255	MPDU1	55	17:7491257-7491273	+	TE	0.92742	0.098791	0.82863	1	K4	1.418	TRUE	inclusion
ENSG00000130159	ECSIT	39	19:11616744-11616772	-	TE	0.94603	0.119	0.82703	1	K3	1.4769	TRUE	inclusion
ENSG00000130775	THEMIS2	23	1:28212378-28213044	+	TE	0.45052	0.10961	0.34091	0.97	K2	0.9901	TRUE	inclusion
ENSG00000130775	THEMIS2	24	1:28213045-28213184	+	TE	0.54813	0.10985	0.43828	0.991	K2	0.9901	TRUE	inclusion
ENSG00000130775	THEMIS2	25	1:28213185-28213196	+	TE	0.10683	0.88761	-0.78078	1	K2	0.9901	TRUE	exclusion
ENSG00000131037	EPS8L1	52	19:55598896-55599057	+	TE	0.094805	0.57142	-0.47661	0.996	K3	0.9718	TRUE	exclusion
ENSG00000131037	EPS8L1	54	19:55599217-55599273	+	TE	0.39198	0.11603	0.27595	0.947	K3	0.9718	TRUE	inclusion
ENSG00000131051	RBM39	103	20:34291533-34291819	-	TE	0.77564	0.37571	0.39993	0.925	K4	1.9888	TRUE	inclusion
ENSG00000131095	GFAP	58	17:42982994-42984252	-	TE	0.87011	0.30199	0.56812	0.995	K3	0.9918	TRUE	inclusion
ENSG00000131446	MGAT1	6	5:180237921-180237938	-	TS	0.053335	0.48215	-0.42881	0.998	K1	0.9993	TRUE	exclusion
ENSG00000131446	MGAT1	7	5:180237729-180237920	-	TS	0.94191	0.51184	0.43007	0.999	K1	0.9993	TRUE	inclusion
ENSG00000131711	MAP1B	14	5:71489693-71491141	+	TE	0.92954	0.12957	0.79997	1	K2	0	TRUE	inclusion
ENSG00000131771	PPP1R1B	22	17:37792069-37792253	+	TE	0.09648	0.70832	-0.61184	1	K3	0.9732	TRUE	exclusion
ENSG00000131771	PPP1R1B	23	17:37792254-37792875	+	TE	0.88098	0.094022	0.78696	1	K3	0.9732	TRUE	inclusion
ENSG00000132305	IMMT	4	2:86422557-86422558	-	TS	0.89397	0.10624	0.78773	1	K3	0.2633	TRUE	inclusion
ENSG00000132305	IMMT	6	2:86422461-86422526	-	TS	0.084444	0.89158	-0.80714	1	K3	0.2633	TRUE	exclusion
ENSG00000132361	CLUH	55	17:2592683-2594071	-	TE	0.85178	0.14865	0.70313	1	K1	0.1851	TRUE	inclusion
ENSG00000132361	CLUH	56	17:2592680-2592682	-	TE	0.14353	0.85511	-0.71158	0.999	K1	0.1851	TRUE	exclusion
ENSG00000132763	MMACHC	7	1:45975647-45976177	+	TE	0.32068	0.043235	0.27744	0.912	K1	0.9986	TRUE	inclusion
ENSG00000132763	MMACHC	8	1:45976178-45976739	+	TE	0.67402	0.95715	-0.28313	0.914	K1	0.9986	TRUE	exclusion
ENSG00000132773	TOE1	20	1:45808754-45809431	+	TE	0.11091	0.76432	-0.65341	0.996	K2	0.8552	TRUE	exclusion
ENSG00000133107	TRPC4	2	13:38443861-38443939	-	TS	0.3647	0.10602	0.25868	0.947	K2	0.924	TRUE	inclusion
ENSG00000133107	TRPC4	3	13:38443732-38443860	-	TS	0.63978	0.89164	-0.25186	0.949	K2	0.924	TRUE	exclusion
ENSG00000133256	PDE6B	47	4:664543-664571	+	TE	0.89461	0.37966	0.51495	0.958	K3	0.9482	TRUE	inclusion
ENSG00000133392	MYH11	60	16:15797848-15797980	-	TE	0.016123	0.42638	-0.41025	0.956	K2	1.5516	TRUE	exclusion
ENSG00000133401	PDZD2	49	5:32111033-32111037	+	TE	0.05427	0.49211	-0.43784	0.903	K3	1.7136	TRUE	exclusion
ENSG00000133961	NUMB	55	14:73743286-73743916	-	TE	0.54432	0.072719	0.4716	0.986	K3	1.8712	TRUE	inclusion
ENSG00000134072	CAMK1	20	3:9799076-9799305	-	TE	0.45785	0.058796	0.39905	0.9	K3	0.9519	TRUE	inclusion
ENSG00000134138	MEIS2	1	15:37393481-37393504	-	TS	0.12989	0.68446	-0.55457	0.906	K2	0	TRUE	exclusion
ENSG00000134308	YWHAQ	13	2:9725210-9725474	-	TE	0.53537	0.16604	0.36933	0.936	K1	0.9906	TRUE	inclusion
ENSG00000134308	YWHAQ	14	2:9724101-9725209	-	TE	0.46286	0.83549	-0.37263	0.96	K1	0.9906	TRUE	exclusion
ENSG00000134970	TMED7	8	5:114951763-114952142	-	TE	0.11501	0.66779	-0.55278	0.996	K1	0.9048	TRUE	exclusion
ENSG00000134970	TMED7	9	5:114949205-114951762	-	TE	0.88723	0.33386	0.55337	0.997	K1	0.9048	TRUE	inclusion
ENSG00000134982	APC	37	5:112174752-112175205	+	TE	0.73087	0.2835	0.44737	0.979	K3	1.5089	TRUE	inclusion
ENSG00000135127	BICDL1	31	12:120531146-120531198	+	TE	0.42862	0.15109	0.27752	0.939	K3	2.088	TRUE	inclusion
ENSG00000135387	CAPRIN1	50	11:34120936-34121061	+	TE	0.48357	0.10766	0.37591	0.974	K3	1.4444	TRUE	inclusion
ENSG00000135387	CAPRIN1	52	11:34122012-34122698	+	TE	0.22569	0.69442	-0.46872	0.942	K3	1.4444	TRUE	exclusion
ENSG00000135469	COQ10A	23	12:56664243-56664253	+	TE	0.87406	0.12656	0.7475	1	K3	0.9568	TRUE	inclusion
ENSG00000135469	COQ10A	25	12:56664434-56664449	+	TE	0.12288	0.60011	-0.47723	0.985	K3	0.9568	TRUE	exclusion
ENSG00000135473	PAN2	69	12:56710731-56711131	-	TE	0.095692	0.45542	-0.35973	0.952	K3	1.3872	TRUE	exclusion
ENSG00000135473	PAN2	73	12:56710007-56710719	-	TE	0.90515	0.51755	0.3876	0.958	K3	1.3872	TRUE	inclusion
ENSG00000135482	ZC3H10	11	12:56514483-56514583	+	TE	0.74558	0.070827	0.67475	1	K2	0.6163	TRUE	inclusion
ENSG00000135482	ZC3H10	13	12:56514613-56516278	+	TE	0.25497	0.93029	-0.67532	0.999	K2	0.6163	TRUE	exclusion
ENSG00000135596	MICAL1	47	6:109765265-109765267	-	TE	0.1186	0.73818	-0.61958	0.901	K1	0	TRUE	exclusion
ENSG00000135638	EMX1	8	2:73160916-73161368	+	TE	0.3035	0.063465	0.24003	0.964	K2	1.2849	TRUE	inclusion
ENSG00000135638	EMX1	9	2:73161369-73161457	+	TE	0.60229	0.063234	0.53905	1	K2	1.2849	TRUE	inclusion
ENSG00000135638	EMX1	11	2:73161494-73162020	+	TE	0.17815	0.93105	-0.7529	1	K2	1.2849	TRUE	exclusion
ENSG00000135926	TMBIM1	49	2:219140155-219140344	-	TE	0.34485	0.057617	0.28724	0.904	K2	0.9997	TRUE	inclusion
ENSG00000135968	GCC2	20	2:109088270-109088300	+	TS	0.10175	0.56213	-0.46038	0.987	K1	0.9784	TRUE	exclusion
ENSG00000135968	GCC2	21	2:109088301-109088572	+	TS	0.89608	0.43443	0.46165	0.985	K1	0.9784	TRUE	inclusion
ENSG00000136002	ARHGEF4	43	2:131804282-131804824	+	TE	0.1556	0.80741	-0.65181	0.969	K3	1.5412	TRUE	exclusion
ENSG00000136026	CKAP4	1	12:106698030-106698057	-	TS	0.76223	0.10198	0.66024	0.994	K1	0.9603	TRUE	inclusion
ENSG00000136026	CKAP4	2	12:106697790-106698029	-	TS	0.24188	0.89947	-0.65758	0.995	K1	0.9603	TRUE	exclusion
ENSG00000136040	PLXNC1	52	12:94699432-94701451	+	TE	0.69386	0.56431	0.12955	0.931	K2	1.3988	TRUE	inclusion
ENSG00000136404	TM6SF1	24	15:83805233-83805424	+	TE	0.32405	0.11095	0.2131	0.907	K2	1.8668	TRUE	inclusion
ENSG00000136631	VPS45	1	1:150039369-150039404	+	TS	0.87312	0.11976	0.75336	1	K2	0.6595	TRUE	inclusion
ENSG00000137171	KLC4	60	6:43042647-43042825	+	TE	0.87318	0.10563	0.76754	1	K3	0.0023	TRUE	inclusion
ENSG00000137171	KLC4	64	6:43042834-43042837	+	TE	0.12961	0.89304	-0.76343	1	K3	0.0023	TRUE	exclusion
ENSG00000137494	ANKRD42	27	11:82959586-82960013	+	TE	0.66888	0.27238	0.3965	0.911	K1	0.9994	TRUE	inclusion
ENSG00000137504	CREBZF	21	11:85371296-85371378	-	TE	0.13282	0.59252	-0.4597	0.975	K3	0.9517	TRUE	exclusion
ENSG00000137504	CREBZF	24	11:85371193-85371196	-	TE	0.73147	0.13692	0.59455	0.997	K3	0.9517	TRUE	inclusion
ENSG00000137693	YAP1	1	11:101981192-101981209	+	TS	0.20514	0.59088	-0.38574	0.92	K2	0.9979	TRUE	exclusion
ENSG00000137713	PPP2R1B	28	11:111612241-111612271	-	TE	0.12674	0.84727	-0.72053	0.998	K3	0.9618	TRUE	exclusion
ENSG00000137819	PAQR5	18	15:69695920-69696843	+	TE	0.42047	0.178	0.24247	0.929	K2	1.4991	TRUE	inclusion
ENSG00000137936	BCAR3	28	1:94027351-94027677	-	TE	0.085026	0.85999	-0.77496	1	K2	1.0611	TRUE	exclusion
ENSG00000137936	BCAR3	29	1:94027348-94027350	-	TE	0.65048	0.14049	0.50999	0.989	K2	1.0611	TRUE	inclusion
ENSG00000138075	ABCG5	18	2:44039982-44040448	-	TE	0.69985	0.15286	0.547	0.991	K2	0.7665	TRUE	inclusion
ENSG00000138075	ABCG5	20	2:44039611-44039698	-	TE	0.13436	0.84192	-0.70756	0.999	K2	0.7665	TRUE	exclusion
ENSG00000138443	ABI2	12	2:204193181-204193181	+	TS	0.31353	0.10719	0.20634	0.923	K4	1.5037	TRUE	inclusion
ENSG00000138443	ABI2	14	2:204193207-204193354	+	TS	0.098076	0.35783	-0.25976	0.941	K4	1.5037	TRUE	exclusion
ENSG00000139194	RBP5	10	12:7276663-7276770	-	TE	0.010572	0.77124	-0.76067	1	K1	0.9463	TRUE	exclusion
ENSG00000139194	RBP5	11	12:7276280-7276662	-	TE	0.9896	0.22951	0.7601	1	K1	0.9463	TRUE	inclusion
ENSG00000139651	ZNF740	1	12:53574484-53574487	+	TS	0.38951	0.87133	-0.48182	0.981	K1	0.9333	TRUE	exclusion
ENSG00000139651	ZNF740	2	12:53574488-53574621	+	TS	0.61623	0.12741	0.48882	0.989	K1	0.9333	TRUE	inclusion
ENSG00000140285	FGF7	13	15:49776757-49780972	+	TE	0.25763	0.82163	-0.564	0.902	K2	1.6805	TRUE	exclusion
ENSG00000140443	IGF1R	54	15:99500290-99500521	+	TE	0.86325	0.042753	0.8205	1	K2	1	TRUE	inclusion
ENSG00000140443	IGF1R	55	15:99500522-99507758	+	TE	0.10863	0.49765	-0.38902	0.997	K2	1	TRUE	exclusion
ENSG00000140443	IGF1R	56	15:99507759-99507759	+	TE	0.11091	0.49731	-0.38639	0.992	K2	1	TRUE	exclusion
ENSG00000140832	MARVELD3	9	16:71668096-71668450	+	TE	0.61263	0.1361	0.47652	0.985	K1	0.9264	TRUE	inclusion
ENSG00000140832	MARVELD3	10	16:71668451-71670368	+	TE	0.3824	0.86778	-0.48538	0.987	K1	0.9264	TRUE	exclusion
ENSG00000140859	KIFC3	87	16:57792650-57792736	-	TE	0.55264	0.070524	0.48212	0.99	K4	1.5565	TRUE	inclusion
ENSG00000140987	ZSCAN32	30	16:3432499-3433670	-	TE	0.038713	0.60507	-0.56636	1	K3	1.4758	TRUE	exclusion
ENSG00000140987	ZSCAN32	32	16:3432086-3432357	-	TE	0.67154	0.29636	0.37517	0.957	K3	1.4758	TRUE	inclusion
ENSG00000141522	ARHGDIA	39	17:79826216-79826241	-	TE	0.068465	0.46001	-0.39155	0.984	K2	1.4341	TRUE	exclusion
ENSG00000141522	ARHGDIA	40	17:79826136-79826215	-	TE	0.93188	0.39455	0.53732	0.994	K2	1.4341	TRUE	inclusion
ENSG00000142082	SIRT3	39	11:216525-216610	-	TE	0.50145	0.14178	0.35967	0.934	K3	1.5148	TRUE	inclusion
ENSG00000143036	SLC44A3	30	1:95360374-95360585	+	TE	0.78192	0.11065	0.67128	0.995	K2	0.9892	TRUE	inclusion
ENSG00000143036	SLC44A3	31	1:95360586-95360608	+	TE	0.10463	0.6521	-0.54747	0.993	K2	0.9892	TRUE	exclusion
ENSG00000143321	HDGF	5	1:156722026-156722064	-	TS	0.13057	0.76987	-0.6393	0.999	K2	0.6632	TRUE	exclusion
ENSG00000143321	HDGF	6	1:156722021-156722025	-	TS	0.8729	0.23336	0.63954	0.999	K2	0.6632	TRUE	inclusion
ENSG00000143549	TPM3	60	1:154128840-154128841	-	TE	0.4724	0.12703	0.34537	0.967	K4	1.0105	TRUE	inclusion
ENSG00000143952	VPS54	30	2:64119280-64120034	-	TE	0.75637	0.3551	0.40127	0.926	K2	1.2577	TRUE	inclusion
ENSG00000144635	DYNC1LI1	2	3:32612318-32612350	-	TS	0.85737	0.31616	0.5412	0.965	K2	0.9996	TRUE	inclusion
ENSG00000144895	EIF2A	46	3:150301691-150301810	+	TE	0.63948	0.19466	0.44481	0.931	K3	1.1238	TRUE	inclusion
ENSG00000145014	TMEM44	37	3:194309177-194309197	-	TE	0.093488	0.49274	-0.39926	0.931	K3	1.8218	TRUE	exclusion
ENSG00000145014	TMEM44	38	3:194308602-194309176	-	TE	0.67233	0.24466	0.42767	0.914	K3	1.8218	TRUE	inclusion
ENSG00000145191	EIF2B5	4	3:183853164-183853172	+	TS	0.09001	0.63704	-0.54703	0.998	K3	0.9216	TRUE	exclusion
ENSG00000145191	EIF2B5	6	3:183853188-183853368	+	TS	0.9107	0.36442	0.54628	0.999	K3	0.9216	TRUE	inclusion
ENSG00000145391	SETD7	8	4:140477393-140477923	-	TS	0.11906	0.88286	-0.7638	1	K2	0.0833	TRUE	exclusion
ENSG00000145391	SETD7	10	4:140477252-140477362	-	TS	0.88978	0.10829	0.78149	1	K2	0.0833	TRUE	inclusion
ENSG00000146122	DAAM2	37	6:39869589-39872644	+	TE	0.0064846	0.72853	-0.72205	0.991	K1	0.5288	TRUE	exclusion
ENSG00000146122	DAAM2	38	6:39872645-39872648	+	TE	0.99332	0.27168	0.72163	0.994	K1	0.5288	TRUE	inclusion
ENSG00000147144	CCDC120	25	X:48925627-48925875	+	TE	0.80448	0.19582	0.60865	0.999	K2	1.2124	TRUE	inclusion
ENSG00000147144	CCDC120	26	X:48925876-48925890	+	TE	0.10143	0.53948	-0.43805	0.985	K2	1.2124	TRUE	exclusion
ENSG00000147364	FBXO25	25	8:419056-419690	+	TE	0.87788	0.31787	0.56	0.918	K2	1.1003	TRUE	inclusion
ENSG00000147535	PLPP5	40	8:38121835-38121868	-	TE	0.75376	0.34694	0.40682	0.923	K3	1.5267	TRUE	inclusion
ENSG00000147536	GINS4	25	8:41399929-41402549	+	TE	0.45112	0.17168	0.27945	0.906	K3	1.0666	TRUE	inclusion
ENSG00000147548	NSD3	46	8:38127215-38132543	-	TE	0.76411	0.99245	-0.22834	0.996	K2	0.9575	TRUE	exclusion
ENSG00000147912	FBXO10	22	9:37512544-37512718	-	TE	0.18295	0.024271	0.15868	0.921	K1	0.9231	TRUE	inclusion
ENSG00000147912	FBXO10	23	9:37510889-37512543	-	TE	0.81754	0.97568	-0.15813	0.935	K1	0.9231	TRUE	exclusion
ENSG00000148057	IDNK	13	9:86258344-86258539	+	TE	0.34464	0.044031	0.30061	0.903	K3	1.6006	TRUE	inclusion
ENSG00000148187	MRRF	6	9:125027193-125027204	+	TS	0.093607	0.59309	-0.49949	0.998	K3	0.9647	TRUE	exclusion
ENSG00000148187	MRRF	7	9:125027205-125027217	+	TS	0.91295	0.39653	0.51642	1	K3	0.9647	TRUE	inclusion
ENSG00000148303	RPL7A	14	9:136216908-136217094	+	RI	0.26805	0.63886	-0.37081	0.903	K1	0.9996	TRUE	exclusion
ENSG00000148444	COMMD3	2	10:22605315-22605327	+	TS	0.64091	0.36087	0.28004	0.912	K4	1.9981	TRUE	inclusion
ENSG00000149948	HMGA2	1	12:66217911-66218239	+	TS	0.75012	0.18931	0.56081	0.953	K3	0.9637	TRUE	inclusion
ENSG00000149948	HMGA2	5	12:66218903-66219161	+	TS	0.25222	0.80429	-0.55207	0.945	K3	0.9637	TRUE	exclusion
ENSG00000151006	PRSS53	23	16:31094758-31095130	-	TE	0.13228	0.86396	-0.73168	0.999	K1	0	TRUE	exclusion
ENSG00000151006	PRSS53	24	16:31094746-31094757	-	TE	0.86299	0.13311	0.72988	0.998	K1	0	TRUE	inclusion
ENSG00000151093	OXSM	2	3:25824530-25824563	+	TS	0.87856	0.11876	0.75979	1	K2	0.8588	TRUE	inclusion
ENSG00000151093	OXSM	3	3:25824564-25824771	+	TS	0.1186	0.79314	-0.67454	1	K2	0.8588	TRUE	exclusion
ENSG00000151474	FRMD4A	45	10:13688272-13688333	-	TE	0.017002	0.22895	-0.21194	0.975	K2	1.6908	TRUE	exclusion
ENSG00000151623	NR3C2	20	4:149002495-149002650	-	TE	0.148	0.6738	-0.5258	0.975	K3	1.7584	TRUE	exclusion
ENSG00000151704	KCNJ1	10	11:128709721-128709958	-	TE	0.7594	0.27143	0.48797	0.99	K3	1.2869	TRUE	inclusion
ENSG00000151704	KCNJ1	15	11:128706210-128707914	-	TE	0.23559	0.61183	-0.37624	0.962	K3	1.2869	TRUE	exclusion
ENSG00000151743	AMN1	30	12:31825104-31825211	-	TE	0.059754	0.45191	-0.39216	0.916	K2	0.9943	TRUE	exclusion
ENSG00000152348	ATG10	24	5:81549887-81550611	+	TE	0.40406	0.071068	0.33299	0.944	K1	0.9665	TRUE	inclusion
ENSG00000152348	ATG10	25	5:81550612-81551958	+	TE	0.60418	0.92801	-0.32383	0.933	K1	0.9665	TRUE	exclusion
ENSG00000152457	DCLRE1C	36	10:14950741-14951168	-	TE	0.0027677	0.14488	-0.14211	0.986	K3	1.4854	TRUE	exclusion
ENSG00000152578	GRIA4	41	11:105850467-105850988	+	TE	0.70995	0.12189	0.58807	0.999	K2	0.8555	TRUE	inclusion
ENSG00000152578	GRIA4	42	11:105850989-105852816	+	TE	0.26557	0.77053	-0.50495	0.984	K2	0.8555	TRUE	exclusion
ENSG00000153094	BCL2L11	28	2:111922221-111922625	+	TE	0.10752	0.34705	-0.23952	0.912	K3	0.9879	TRUE	exclusion
ENSG00000153130	SCOC	20	4:141302435-141302729	+	TE	0.71186	0.14349	0.56837	0.997	K4	1.7322	TRUE	inclusion
ENSG00000153790	C7orf31	20	7:25175354-25176412	-	TE	0.098926	0.74232	-0.64339	0.999	K1	0.6779	TRUE	exclusion
ENSG00000153790	C7orf31	21	7:25174316-25175353	-	TE	0.90267	0.25683	0.64584	0.998	K1	0.6779	TRUE	inclusion
ENSG00000154096	THY1	21	11:119290018-119290084	-	TE	0.055834	0.89397	-0.83813	1	K3	0.9566	TRUE	exclusion
ENSG00000154096	THY1	24	11:119288090-119289529	-	TE	0.73683	0.10798	0.62885	0.999	K3	0.9566	TRUE	inclusion
ENSG00000154380	ENAH	26	1:225685125-225685335	-	TE	0.64537	0.059591	0.58578	1	K3	0.8878	TRUE	inclusion
ENSG00000154380	ENAH	29	1:225683182-225684786	-	TE	0.35994	0.85897	-0.49903	0.993	K3	0.8878	TRUE	exclusion
ENSG00000154429	CCSAP	9	1:229459286-229461158	-	TE	0.021359	0.26437	-0.24301	0.948	K2	1.3682	TRUE	exclusion
ENSG00000154889	MPPE1	75	18:11884489-11884626	-	TE	0.53301	0.11733	0.41567	0.947	K3	1.7933	TRUE	inclusion
ENSG00000154889	MPPE1	82	18:11882621-11883469	-	TE	0.19589	0.50011	-0.30422	0.984	K3	1.7933	TRUE	exclusion
ENSG00000155189	AGPAT5	2	8:6566187-6566213	+	TS	0.11396	0.72646	-0.6125	0.997	K2	0.9589	TRUE	exclusion
ENSG00000155189	AGPAT5	3	8:6566214-6566380	+	TS	0.59714	0.14586	0.45128	0.979	K2	0.9589	TRUE	inclusion
ENSG00000156050	FAM161B	1	14:74416836-74417117	-	TS	0.099931	0.67178	-0.57185	0.993	K1	0.8321	TRUE	exclusion
ENSG00000156050	FAM161B	2	14:74416676-74416835	-	TS	0.90547	0.32985	0.57561	0.998	K1	0.8321	TRUE	inclusion
ENSG00000156574	NODAL	4	10:72192505-72192844	-	TE	0.18122	0.6846	-0.50338	0.976	K1	0.8442	TRUE	exclusion
ENSG00000156574	NODAL	5	10:72192071-72192504	-	TE	0.81439	0.32033	0.49406	0.971	K1	0.8442	TRUE	inclusion
ENSG00000157020	SEC13	46	3:10342634-10342644	-	TE	0.86454	0.094891	0.76965	1	K2	0	TRUE	inclusion
ENSG00000157168	NRG1	6	8:32406137-32406244	+	TS	0.54041	0.11971	0.4207	0.912	K2	1.3058	TRUE	inclusion
ENSG00000157578	LCA5L	29	21:40800328-40800387	-	TE	0.8952	0.13554	0.75965	1	K3	0.2585	TRUE	inclusion
ENSG00000157578	LCA5L	35	21:40800134-40800135	-	TE	0.09043	0.87749	-0.78706	1	K3	0.2585	TRUE	exclusion
ENSG00000157890	MEGF11	54	15:66194534-66194833	-	TE	0.25194	0.03281	0.21913	0.953	K1	0.9613	TRUE	inclusion
ENSG00000157890	MEGF11	55	15:66194110-66194533	-	TE	0.74882	0.96694	-0.21812	0.933	K1	0.9613	TRUE	exclusion
ENSG00000158234	FAIM	22	3:138351772-138351945	+	TE	0.082568	0.63313	-0.55056	0.998	K2	0.9514	TRUE	exclusion
ENSG00000158234	FAIM	23	3:138351946-138352211	+	TE	0.91729	0.37501	0.54228	0.997	K2	0.9514	TRUE	inclusion
ENSG00000158828	PINK1	12	1:20976927-20977809	+	TE	0.42113	0.22641	0.19471	0.908	K2	1.3986	TRUE	inclusion
ENSG00000159374	M1AP	20	2:74785843-74786001	-	TE	0.030167	0.37996	-0.3498	0.927	K3	1.2483	TRUE	exclusion
ENSG00000160360	GPSM1	19	9:139252466-139252995	+	TE	0.24979	0.041788	0.208	0.933	K2	1.0187	TRUE	inclusion
ENSG00000160360	GPSM1	20	9:139252996-139254053	+	TE	0.45316	0.94393	-0.49077	0.965	K2	1.0187	TRUE	exclusion
ENSG00000160471	COX6B2	30	19:55861781-55862168	-	TE	0.15187	0.63463	-0.48277	0.993	K2	1.2553	TRUE	exclusion
ENSG00000160753	RUSC1	43	1:155300522-155300903	+	TE	0.73318	0.09828	0.6349	0.996	K2	1.0149	TRUE	inclusion
ENSG00000160753	RUSC1	44	1:155300904-155300905	+	TE	0.085832	0.42856	-0.34273	0.977	K2	1.0149	TRUE	exclusion
ENSG00000160813	PPP1R35	2	7:100034047-100034096	-	TS	0.36874	0.74909	-0.38035	0.964	K2	0.9767	TRUE	exclusion
ENSG00000160813	PPP1R35	3	7:100033764-100034046	-	TS	0.62964	0.25675	0.37289	0.949	K2	0.9767	TRUE	inclusion
ENSG00000160886	LY6K	12	8:143784541-143784872	+	TE	0.59368	0.10115	0.49253	0.98	K2	1.3407	TRUE	inclusion
ENSG00000160886	LY6K	15	8:143785583-143786545	+	TE	0.29907	0.79171	-0.49264	0.988	K2	1.3407	TRUE	exclusion
ENSG00000161013	MGAT4B	2	5:179233555-179233934	-	TS	0.8757	0.13615	0.73955	1	K2	0	TRUE	inclusion
ENSG00000161013	MGAT4B	3	5:179233487-179233554	-	TS	0.12493	0.86447	-0.73954	1	K2	0	TRUE	exclusion
ENSG00000161048	NAPEPLD	26	7:102742971-102743120	-	TE	0.47247	0.12773	0.34474	0.946	K1	0.9977	TRUE	inclusion
ENSG00000161048	NAPEPLD	27	7:102742957-102742970	-	TE	0.52368	0.87764	-0.35395	0.938	K1	0.9977	TRUE	exclusion
ENSG00000161179	YDJC	2	22:21984326-21984327	-	TS	0.043017	0.50553	-0.46251	0.999	K3	0.9999	TRUE	exclusion
ENSG00000161179	YDJC	3	22:21984321-21984325	-	TS	0.046552	0.49004	-0.44349	0.999	K3	0.9999	TRUE	exclusion
ENSG00000161179	YDJC	5	22:21984302-21984303	-	TS	0.58447	0.11364	0.47083	0.995	K3	0.9999	TRUE	inclusion
ENSG00000161179	YDJC	6	22:21984140-21984301	-	TS	0.41426	0.1153	0.29896	0.971	K3	0.9999	TRUE	inclusion
ENSG00000161298	ZNF382	5	19:37096237-37096249	+	TS	0.13976	0.86069	-0.72093	1	K3	1.7286	TRUE	exclusion
ENSG00000161326	NA	5	17:35872283-35873589	+	TE	0.10227	0.89954	-0.79727	1	K1	0	TRUE	exclusion
ENSG00000161326	NA	6	17:35873590-35873603	+	TE	0.89727	0.1051	0.79217	1	K1	0	TRUE	inclusion
ENSG00000161558	TMEM143	31	19:48836198-48836362	-	TE	0.61197	0.099491	0.51248	0.999	K3	0.9954	TRUE	inclusion
ENSG00000161929	SCIMP	9	17:5113445-5114250	-	TE	0.26755	0.080398	0.18715	0.908	K1	0.9226	TRUE	inclusion
ENSG00000161929	SCIMP	10	17:5112256-5113444	-	TE	0.73151	0.91995	-0.18845	0.919	K1	0.9226	TRUE	exclusion
ENSG00000161960	EIF4A1	37	17:7478998-7479503	+	TE	0.16448	0.87787	-0.71339	1	K3	0.4809	TRUE	exclusion
ENSG00000162144	CYB561A3	58	11:61116310-61116361	-	TE	0.63286	0.079869	0.55299	0.901	K3	0	TRUE	inclusion
ENSG00000162144	CYB561A3	61	11:61116217-61116225	-	TE	0.12748	0.91651	-0.78902	1	K3	0	TRUE	exclusion
ENSG00000162521	RBBP4	53	1:33146127-33146252	+	TE	0.19535	0.030017	0.16533	0.92	K2	1.6949	TRUE	inclusion
ENSG00000162614	NEXN	31	1:78408599-78408884	+	TE	0.029754	0.27303	-0.24328	0.943	K3	1.2763	TRUE	exclusion
ENSG00000162623	TYW3	2	1:75198840-75198857	+	TS	0.24245	0.88844	-0.646	0.996	K2	0.9328	TRUE	exclusion
ENSG00000162627	SNX7	2	1:99127257-99127278	+	TS	0.13169	0.8695	-0.73782	1	K3	0.2034	TRUE	exclusion
ENSG00000162627	SNX7	5	1:99127418-99127467	+	TS	0.86579	0.13283	0.73296	1	K3	0.2034	TRUE	inclusion
ENSG00000162923	WDR26	38	1:224573368-224574204	-	TE	0.20892	0.78225	-0.57333	0.981	K2	0.9731	TRUE	exclusion
ENSG00000163141	BNIPL	22	1:151019164-151019321	+	TE	0.12961	0.78233	-0.65272	1	K2	0.5419	TRUE	exclusion
ENSG00000163281	GNPDA2	15	4:44704805-44705159	-	TE	0.17029	0.011602	0.15869	0.962	K2	1.4374	TRUE	inclusion
ENSG00000163357	DCST1	24	1:155021470-155021595	+	TE	0.85438	0.12772	0.72666	0.999	K1	0.103	TRUE	inclusion
ENSG00000163357	DCST1	25	1:155021596-155021740	+	TE	0.14067	0.87102	-0.73035	0.999	K1	0.103	TRUE	exclusion
ENSG00000163382	NAXE	13	1:156563674-156563921	+	TE	0.42776	0.090371	0.33739	0.98	K2	0.9758	TRUE	inclusion
ENSG00000163382	NAXE	15	1:156563924-156564091	+	TE	0.57268	0.81687	-0.24419	0.917	K2	0.9758	TRUE	exclusion
ENSG00000163659	TIPARP	12	3:156422473-156422909	+	TE	0.11946	0.51182	-0.39236	0.968	K3	0.9933	TRUE	exclusion
ENSG00000163659	TIPARP	14	3:156422929-156424539	+	TE	0.87804	0.48934	0.3887	0.96	K3	0.9933	TRUE	inclusion
ENSG00000163754	GYG1	36	3:148744547-148745134	+	TE	0.55632	0.086726	0.46959	0.99	K2	1.2332	TRUE	inclusion
ENSG00000163754	GYG1	37	3:148745135-148745418	+	TE	0.38482	0.80827	-0.42345	0.98	K2	1.2332	TRUE	exclusion
ENSG00000163762	TM4SF18	14	3:149039064-149039279	-	TE	0.12173	0.0099686	0.11176	0.93	K1	0	TRUE	inclusion
ENSG00000163762	TM4SF18	15	3:149036285-149039063	-	TE	0.87424	0.98961	-0.11536	0.933	K1	0	TRUE	exclusion
ENSG00000163788	SNRK	17	3:43388831-43389098	+	TE	0.47386	0.19613	0.27773	0.92	K3	1.8932	TRUE	inclusion
ENSG00000163840	DTX3L	1	3:122283085-122283273	+	TS	0.1615	0.78196	-0.62046	0.999	K1	0.5769	TRUE	exclusion
ENSG00000163840	DTX3L	2	3:122283274-122283460	+	TS	0.82617	0.21262	0.61355	0.996	K1	0.5769	TRUE	inclusion
ENSG00000163882	POLR2H	1	3:184079506-184079510	+	TS	0.38257	0.81212	-0.42955	0.954	K2	0.986	TRUE	exclusion
ENSG00000163882	POLR2H	2	3:184079511-184079576	+	TS	0.61856	0.19074	0.42782	0.927	K2	0.986	TRUE	inclusion
ENSG00000164023	SGMS2	22	4:108831506-108832109	+	TE	0.61831	0.083119	0.5352	0.994	K1	0.9755	TRUE	inclusion
ENSG00000164023	SGMS2	23	4:108832110-108836203	+	TE	0.37649	0.91577	-0.53928	0.991	K1	0.9755	TRUE	exclusion
ENSG00000164048	ZNF589	17	3:48327736-48328120	+	TE	0.098813	0.55356	-0.45475	0.987	K1	0.9873	TRUE	exclusion
ENSG00000164048	ZNF589	18	3:48328121-48329117	+	TE	0.90403	0.45754	0.44649	0.991	K1	0.9873	TRUE	inclusion
ENSG00000164054	SHISA5	41	3:48509310-48509616	-	TE	0.89621	0.11642	0.77979	1	K3	0.7813	TRUE	inclusion
ENSG00000164188	RANBP3L	20	5:36249435-36249799	-	TE	0.13741	0.57787	-0.44046	0.99	K1	0.9753	TRUE	exclusion
ENSG00000164188	RANBP3L	21	5:36248536-36249434	-	TE	0.86976	0.42438	0.44537	0.992	K1	0.9753	TRUE	inclusion
ENSG00000164190	NIPBL	59	5:37064629-37065604	+	TE	0.050013	0.36434	-0.31433	0.961	K1	0.9995	TRUE	exclusion
ENSG00000164190	NIPBL	60	5:37065605-37066515	+	TE	0.94972	0.63853	0.31119	0.959	K1	0.9995	TRUE	inclusion
ENSG00000164308	ERAP2	40	5:96253166-96253609	+	TE	0.12752	0.69519	-0.56768	0.987	K2	0.978	TRUE	exclusion
ENSG00000164308	ERAP2	42	5:96253637-96255420	+	TE	0.8713	0.29918	0.57212	0.991	K2	0.978	TRUE	inclusion
ENSG00000164930	FZD6	17	8:104343569-104344014	+	TE	0.41642	0.10189	0.31452	0.962	K3	1.3799	TRUE	inclusion
ENSG00000164930	FZD6	19	8:104344121-104344222	+	TE	0.18947	0.65952	-0.47006	0.989	K3	1.3799	TRUE	exclusion
ENSG00000165124	SVEP1	3	9:113341293-113341823	-	TS	0.78273	0.29539	0.48735	0.961	K2	0.996	TRUE	inclusion
ENSG00000165525	NEMF	68	14:50250546-50250819	-	TE	0.43849	0.11833	0.32016	0.944	K3	1.4591	TRUE	inclusion
ENSG00000165637	VDAC2	35	10:76990710-76991033	+	TE	0.040609	0.56993	-0.52932	0.976	K3	0.99	TRUE	exclusion
ENSG00000165637	VDAC2	39	10:76991205-76991206	+	TE	0.77949	0.21562	0.56387	0.92	K3	0.99	TRUE	inclusion
ENSG00000165995	CACNB2	30	10:18828654-18830038	+	TE	0.062358	0.24389	-0.18153	0.928	K2	1.5657	TRUE	exclusion
ENSG00000166233	ARIH1	3	15:72766986-72767276	+	TS	0.13388	0.525	-0.39113	0.972	K2	0.9764	TRUE	exclusion
ENSG00000166233	ARIH1	4	15:72767277-72767355	+	TS	0.86954	0.48537	0.38417	0.968	K2	0.9764	TRUE	inclusion
ENSG00000166321	NUDT13	17	10:74890958-74891586	+	TE	0.99321	0.88144	0.11177	0.965	K2	0.8505	TRUE	inclusion
ENSG00000166444	DENND2B	137	11:8718012-8718213	-	TE	0.79572	0.093426	0.7023	0.999	K1	0.568	TRUE	inclusion
ENSG00000166444	DENND2B	138	11:8717983-8718011	-	TE	0.2101	0.90697	-0.69687	1	K1	0.568	TRUE	exclusion
ENSG00000166747	AP1G1	2	16:71843007-71843053	-	TS	0.12963	0.87444	-0.7448	1	K3	1.667	TRUE	exclusion
ENSG00000166747	AP1G1	3	16:71842988-71843006	-	TS	0.30151	0.088745	0.21277	0.904	K3	1.667	TRUE	inclusion
ENSG00000166747	AP1G1	5	16:71842942-71842965	-	TS	0.44922	0.10081	0.34841	0.97	K3	1.667	TRUE	inclusion
ENSG00000166747	AP1G1	7	16:71842825-71842885	-	TS	0.35384	0.078141	0.2757	0.944	K3	1.667	TRUE	inclusion
ENSG00000166783	MARF1	62	16:15690624-15690794	-	TE	0.69097	0.072423	0.61855	0.999	K3	1.4839	TRUE	inclusion
ENSG00000166783	MARF1	66	16:15688245-15690027	-	TE	0.17213	0.48513	-0.313	0.968	K3	1.4839	TRUE	exclusion
ENSG00000166783	MARF1	67	16:15688244-15688244	-	TE	0.14243	0.36185	-0.21942	0.915	K3	1.4839	TRUE	exclusion
ENSG00000166839	ANKDD1A	35	15:65249578-65251033	+	TE	0.97117	0.36721	0.60395	0.969	K2	1.0072	TRUE	inclusion
ENSG00000166949	SMAD3	36	15:67483233-67483859	+	TE	0.26367	0.87388	-0.61021	0.997	K2	0.8904	TRUE	exclusion
ENSG00000167110	GOLGA2	53	9:131019346-131019560	-	TE	0.58648	0.093961	0.49252	0.991	K1	0.9748	TRUE	inclusion
ENSG00000167110	GOLGA2	54	9:131018108-131019345	-	TE	0.41667	0.904	-0.48733	0.987	K1	0.9748	TRUE	exclusion
ENSG00000167112	TRUB2	15	9:131071382-131071472	-	TE	0.47805	0.14762	0.33043	0.94	K2	0.9986	TRUE	inclusion
ENSG00000167323	STIM1	51	11:4113029-4113196	+	TE	0.70176	0.12962	0.57214	0.995	K3	0.9209	TRUE	inclusion
ENSG00000167522	ANKRD11	23	16:89367104-89367173	-	TE	0.12277	0.46207	-0.3393	0.955	K2	1	TRUE	exclusion
ENSG00000167522	ANKRD11	25	16:89365284-89367052	-	TE	0.88434	0.53558	0.34877	0.948	K2	1	TRUE	inclusion
ENSG00000167524	RSKR	36	17:26937016-26937437	-	TE	0.77844	0.30667	0.47177	0.967	K2	1.4452	TRUE	inclusion
ENSG00000167700	MFSD3	2	8:145734463-145735001	+	TS	0.955	0.049547	0.90546	1	K2	0.0003	TRUE	inclusion
ENSG00000167700	MFSD3	3	8:145735002-145735398	+	TS	0.044406	0.95219	-0.90778	1	K2	0.0003	TRUE	exclusion
ENSG00000167978	SRRM2	6	16:2802717-2802847	+	TS	0.19048	0.72519	-0.53471	0.928	K3	1.1066	TRUE	exclusion
ENSG00000168259	DNAJC7	56	17:40128559-40128681	-	TE	0.61092	0.24628	0.36465	0.902	K3	0.9999	TRUE	inclusion
ENSG00000168291	PDHB	7	3:58419544-58419545	-	TS	0.37182	0.086435	0.28539	0.963	K4	1.5849	TRUE	inclusion
ENSG00000168309	FAM107A	16	3:58549844-58551187	-	TE	0.86634	0.51803	0.34831	0.949	K2	1.469	TRUE	inclusion
ENSG00000168385	SEPTIN2	2	2:242254685-242254703	+	TS	0.69823	0.10861	0.58961	0.995	K3	1.8299	TRUE	inclusion
ENSG00000168386	FILIP1L	23	3:99549323-99549449	-	TE	0.20492	0.81376	-0.60883	0.938	K1	0.9848	TRUE	exclusion
ENSG00000168386	FILIP1L	24	3:99548985-99549322	-	TE	0.79527	0.1874	0.60788	0.944	K1	0.9848	TRUE	inclusion
ENSG00000168661	ZNF30	17	19:35436070-35436074	+	TE	0.13123	0.90342	-0.77219	1	K3	0.9329	TRUE	exclusion
ENSG00000168676	KCTD19	37	16:67323351-67323585	-	TE	0.77848	0.2521	0.52638	0.968	K2	0.9865	TRUE	inclusion
ENSG00000168676	KCTD19	38	16:67323338-67323350	-	TE	0.2253	0.74671	-0.52141	0.968	K2	0.9865	TRUE	exclusion
ENSG00000168679	SLC16A4	22	1:110905470-110905481	-	TE	0.6292	0.34171	0.28749	0.93	K2	1.6908	TRUE	inclusion
ENSG00000168763	CNNM3	1	2:97481982-97481986	+	TS	0.11326	0.89215	-0.77889	1	K1	0.0145	TRUE	exclusion
ENSG00000168763	CNNM3	2	2:97481987-97483239	+	TS	0.88575	0.11003	0.77572	1	K1	0.0145	TRUE	inclusion
ENSG00000168887	C2orf68	10	2:85838366-85838696	-	TE	0.090641	0.45922	-0.36858	0.988	K1	0.9943	TRUE	exclusion
ENSG00000168887	C2orf68	11	2:85837343-85838365	-	TE	0.90822	0.53437	0.37385	0.984	K1	0.9943	TRUE	inclusion
ENSG00000169228	RAB24	26	5:176728487-176728503	-	TE	0.098209	0.86347	-0.76526	1	K3	0.9877	TRUE	exclusion
ENSG00000169228	RAB24	27	5:176728465-176728486	-	TE	0.54804	0.094703	0.45333	0.987	K3	0.9877	TRUE	inclusion
ENSG00000169228	RAB24	30	5:176728199-176728451	-	TE	0.43759	0.13866	0.29892	0.95	K3	0.9877	TRUE	inclusion
ENSG00000169242	EFNA1	10	1:155106431-155106601	+	TE	0.12027	0.4418	-0.32153	0.905	K2	1.4932	TRUE	exclusion
ENSG00000169379	ARL13B	30	3:93772914-93772998	+	TE	0.13689	0.45128	-0.31439	0.948	K3	1.6989	TRUE	exclusion
ENSG00000169379	ARL13B	33	3:93774126-93774512	+	TE	0.86261	0.3213	0.54131	0.993	K3	1.6989	TRUE	inclusion
ENSG00000169814	BTD	27	3:15687090-15687203	+	TE	0.060596	0.88831	-0.82771	1	K3	0.4063	TRUE	exclusion
ENSG00000169814	BTD	29	3:15687223-15687329	+	TE	0.87079	0.11427	0.75652	1	K3	0.4063	TRUE	inclusion
ENSG00000169946	ZFPM2	23	8:106815826-106815828	+	TE	0.34949	0.074605	0.27489	0.967	K2	1.4684	TRUE	inclusion
ENSG00000170364	SETMAR	1	3:4344988-4345015	+	TS	0.65037	0.13535	0.51503	0.991	K3	0.9006	TRUE	inclusion
ENSG00000170364	SETMAR	2	3:4345016-4345020	+	TS	0.35312	0.86725	-0.51413	0.988	K3	0.9006	TRUE	exclusion
ENSG00000171053	PATE1	11	11:125618495-125618732	+	TE	0.81838	0.23878	0.5796	0.99	K1	0.8828	TRUE	inclusion
ENSG00000171053	PATE1	12	11:125618733-125619762	+	TE	0.18663	0.76844	-0.58181	0.991	K1	0.8828	TRUE	exclusion
ENSG00000171159	C9orf16	9	9:130925826-130926016	+	TE	0.3717	0.10399	0.26771	0.931	K2	0.9977	TRUE	inclusion
ENSG00000171202	TMEM126A	13	11:85367353-85367510	+	TE	0.52786	0.18341	0.34446	0.945	K3	0.9947	TRUE	inclusion
ENSG00000171202	TMEM126A	14	11:85367511-85367553	+	TE	0.46896	0.81371	-0.34475	0.949	K3	0.9947	TRUE	exclusion
ENSG00000171970	ZNF57	10	19:2918345-2918474	+	TE	0.21701	0.64377	-0.42676	0.929	K2	0.9974	TRUE	exclusion
ENSG00000172113	NME6	27	3:48339597-48339745	-	TE	0.11456	0.51373	-0.39917	0.984	K2	0.9992	TRUE	exclusion
ENSG00000172113	NME6	28	3:48338967-48339596	-	TE	0.87686	0.47904	0.39783	0.978	K2	0.9992	TRUE	inclusion
ENSG00000172113	NME6	43	3:48336009-48336011	-	TE	0.39164	0.11799	0.27365	0.959	K4	1.2199	TRUE	inclusion
ENSG00000172432	GTPBP2	24	6:43589004-43589253	-	TE	0.52387	0.12831	0.39557	0.955	K1	0.9809	TRUE	inclusion
ENSG00000172432	GTPBP2	25	6:43588227-43589003	-	TE	0.47343	0.87089	-0.39746	0.959	K1	0.9809	TRUE	exclusion
ENSG00000172465	TCEAL1	8	X:102884813-102885145	+	TE	0.73009	0.13901	0.59108	0.996	K2	0.6981	TRUE	inclusion
ENSG00000172465	TCEAL1	9	X:102885146-102885375	+	TE	0.12851	0.77043	-0.64192	0.996	K2	0.6981	TRUE	exclusion
ENSG00000172725	CORO1B	31	11:67205553-67205753	-	TE	0.098432	0.7158	-0.61737	0.983	K2	0.9634	TRUE	exclusion
ENSG00000172725	CORO1B	33	11:67205519-67205546	-	TE	0.89936	0.1328	0.76656	1	K2	0.9634	TRUE	inclusion
ENSG00000173421	IHO1	18	3:49293567-49295156	+	TE	0.13466	0.6169	-0.48224	0.91	K1	0.9155	TRUE	exclusion
ENSG00000173421	IHO1	19	3:49295157-49295537	+	TE	0.85922	0.38719	0.47203	0.928	K1	0.9155	TRUE	inclusion
ENSG00000173540	GMPPB	22	3:49757357-49758908	-	TE	0.84145	0.73894	0.10251	0.984	K2	0.8854	TRUE	inclusion
ENSG00000173540	GMPPB	23	3:49754277-49757356	-	TE	0.15869	0.26084	-0.10215	0.98	K2	0.8854	TRUE	exclusion
ENSG00000173890	GPR160	28	3:169802250-169803191	+	TE	0.74814	0.44746	0.30067	0.903	K3	1.5715	TRUE	inclusion
ENSG00000173898	SPTBN2	52	11:66453123-66453575	-	TE	0.14484	0.63024	-0.4854	0.969	K2	1.0621	TRUE	exclusion
ENSG00000173898	SPTBN2	53	11:66452723-66453122	-	TE	0.8386	0.36354	0.47506	0.961	K2	1.0621	TRUE	inclusion
ENSG00000174456	C12orf76	18	12:110480086-110480116	-	TE	0.14038	0.61288	-0.47249	0.985	K3	0.9377	TRUE	exclusion
ENSG00000174456	C12orf76	21	12:110478965-110479699	-	TE	0.85488	0.38793	0.46695	0.979	K3	0.9377	TRUE	inclusion
ENSG00000174473	GALNTL6	24	4:173961084-173961251	+	TE	0.066442	0.79494	-0.7285	1	K1	0.6259	TRUE	exclusion
ENSG00000174473	GALNTL6	25	4:173961252-173962710	+	TE	0.93307	0.20724	0.72582	1	K1	0.6259	TRUE	inclusion
ENSG00000174579	MSL2	9	3:135869469-135871037	-	TE	0.083341	0.49966	-0.41632	0.992	K3	1	TRUE	exclusion
ENSG00000174579	MSL2	10	3:135867764-135869468	-	TE	0.917	0.49714	0.41986	0.983	K3	1	TRUE	inclusion
ENSG00000174871	CNIH2	16	11:66051222-66051586	+	TE	0.12308	0.89601	-0.77293	1	K2	0	TRUE	exclusion
ENSG00000174871	CNIH2	17	11:66051587-66051664	+	TE	0.86746	0.11066	0.7568	1	K2	0	TRUE	inclusion
ENSG00000174939	ASPHD1	13	16:29930852-29930953	+	TE	0.033701	0.73214	-0.69844	0.971	K1	0.5871	TRUE	exclusion
ENSG00000174939	ASPHD1	14	16:29930954-29931185	+	TE	0.96517	0.26897	0.6962	0.967	K1	0.5871	TRUE	inclusion
ENSG00000175182	FAM131A	27	3:184063230-184064027	+	TE	0.91303	0.13291	0.78011	1	K2	0.1071	TRUE	inclusion
ENSG00000175182	FAM131A	28	3:184064028-184064061	+	TE	0.084393	0.85561	-0.77121	1	K2	0.1071	TRUE	exclusion
ENSG00000175279	CENPS	14	1:10502560-10502714	+	TE	0.40814	0.11953	0.28861	0.94	K2	1.5514	TRUE	inclusion
ENSG00000175279	CENPS	15	1:10502715-10502866	+	TE	0.29181	0.72824	-0.43642	0.957	K2	1.5514	TRUE	exclusion
ENSG00000175416	CLTB	18	5:175819650-175819793	-	TE	0.11991	0.5092	-0.38929	0.964	K2	0.9997	TRUE	exclusion
ENSG00000175416	CLTB	19	5:175819643-175819649	-	TE	0.46692	0.13535	0.33157	0.946	K2	0.9997	TRUE	inclusion
ENSG00000175482	POLD4	29	11:67119079-67119279	-	TE	0.18174	0.78811	-0.60637	0.992	K3	1.4318	TRUE	exclusion
ENSG00000175582	RAB6A	24	11:73388444-73388938	-	TE	0.47759	0.11109	0.3665	0.964	K3	0.9971	TRUE	inclusion
ENSG00000175582	RAB6A	25	11:73386941-73388443	-	TE	0.5184	0.89506	-0.37666	0.967	K3	0.9971	TRUE	exclusion
ENSG00000176095	IP6K1	19	3:49764346-49764460	-	TE	0.096043	0.50833	-0.41229	0.986	K3	1.4955	TRUE	exclusion
ENSG00000176095	IP6K1	20	3:49761728-49764345	-	TE	0.62135	0.31877	0.30258	0.909	K3	1.4955	TRUE	inclusion
ENSG00000176153	GPX2	8	14:65406226-65406556	-	TE	0.411	0.10098	0.31002	0.924	K2	1.5042	TRUE	inclusion
ENSG00000176155	CCDC57	53	17:80064252-80064463	-	TS	0.091182	0.87934	-0.78816	1	K1	0.1852	TRUE	exclusion
ENSG00000176155	CCDC57	54	17:80064146-80064251	-	TS	0.90908	0.12525	0.78384	1	K1	0.1852	TRUE	inclusion
ENSG00000176170	SPHK1	1	17:74372665-74372741	+	TS	0.64667	0.089431	0.55724	1	K1	0.9037	TRUE	inclusion
ENSG00000176170	SPHK1	2	17:74372742-74372893	+	TS	0.36063	0.91332	-0.55269	0.996	K1	0.9037	TRUE	exclusion
ENSG00000176871	WSB2	31	12:118470712-118471616	-	TE	0.99109	0.76294	0.22815	0.986	K3	1.3833	TRUE	inclusion
ENSG00000177807	KCNJ10	5	1:160010261-160010391	-	TE	0.89975	0.12448	0.77527	1	K1	0.1531	TRUE	inclusion
ENSG00000177807	KCNJ10	6	1:160007257-160010260	-	TE	0.093383	0.87709	-0.78371	1	K1	0.1531	TRUE	exclusion
ENSG00000177842	ZNF620	12	3:40557436-40559200	+	TE	0.48247	0.15725	0.32522	0.946	K2	0.9984	TRUE	inclusion
ENSG00000177842	ZNF620	13	3:40559201-40560227	+	TE	0.51856	0.8434	-0.32484	0.943	K2	0.9984	TRUE	exclusion
ENSG00000177889	UBE2N	11	12:93803856-93804509	-	RI	0.82283	0.49855	0.32428	0.9	K1	0.9897	TRUE	inclusion
ENSG00000178104	PDE4DIP	6	1:145075902-145075977	-	TS	0.90124	0.06323	0.83801	1	K3	0.855	TRUE	inclusion
ENSG00000178104	PDE4DIP	7	1:145075892-145075901	-	TS	0.101	0.77128	-0.67028	0.998	K3	0.855	TRUE	exclusion
ENSG00000178149	DALRD3	44	3:49052957-49052957	-	TE	0.66233	0.50552	0.15681	0.938	K3	1	TRUE	inclusion
ENSG00000178149	DALRD3	47	3:49052921-49052923	-	TE	0.33676	0.49439	-0.15763	0.932	K3	1	TRUE	exclusion
ENSG00000178163	ZNF518B	10	4:10447726-10448163	-	TE	0.73063	0.12378	0.60684	0.997	K1	0.7219	TRUE	inclusion
ENSG00000178163	ZNF518B	11	4:10441498-10447725	-	TE	0.25717	0.87533	-0.61816	1	K1	0.7219	TRUE	exclusion
ENSG00000178802	MPI	42	15:75189272-75189296	+	TE	0.12987	0.75247	-0.62261	0.917	K2	0.4084	TRUE	exclusion
ENSG00000178802	MPI	53	15:75190570-75191782	+	TE	0.85696	0.29933	0.55764	0.953	K3	1.3636	TRUE	inclusion
ENSG00000178927	CYBC1	83	17:80401325-80401331	-	TE	0.11752	0.86545	-0.74793	1	K3	0.5262	TRUE	exclusion
ENSG00000178927	CYBC1	85	17:80400520-80400775	-	TE	0.79363	0.12959	0.66404	1	K3	0.5262	TRUE	inclusion
ENSG00000179409	GEMIN4	15	17:649871-650406	-	TE	0.20019	0.03204	0.16815	0.904	K3	1.5142	TRUE	inclusion
ENSG00000179715	PCED1B	13	12:47629156-47629348	+	TE	0.7477	0.26938	0.47832	0.946	K3	1.1236	TRUE	inclusion
ENSG00000179889	PDXDC1	61	16:15130536-15131544	+	TE	0.17861	0.70901	-0.5304	0.975	K3	0.9991	TRUE	exclusion
ENSG00000180008	SOCS4	9	14:55513427-55516204	+	TE	0.086492	0.61534	-0.52885	0.999	K2	0.9343	TRUE	exclusion
ENSG00000180008	SOCS4	10	14:55516205-55516206	+	TE	0.90748	0.38572	0.52177	0.993	K2	0.9343	TRUE	inclusion
ENSG00000180398	MCFD2	27	2:47132605-47132733	-	TE	0.88029	0.1177	0.76259	1	K4	0.6198	TRUE	inclusion
ENSG00000180398	MCFD2	34	2:47129013-47131993	-	TE	0.12738	0.75891	-0.63153	0.996	K4	0.6198	TRUE	exclusion
ENSG00000180488	MIGA1	25	1:78340531-78340825	+	TE	0.64024	0.20889	0.43134	0.901	K1	0.9974	TRUE	inclusion
ENSG00000180488	MIGA1	26	1:78340826-78344106	+	TE	0.35815	0.79248	-0.43433	0.909	K1	0.9974	TRUE	exclusion
ENSG00000181027	FKRP	37	19:47258918-47258923	+	TE	0.63733	0.12976	0.50757	0.994	K5	1.4671	TRUE	inclusion
ENSG00000181027	FKRP	48	19:47261171-47261742	+	TE	0.086041	0.86664	-0.78059	1	K5	1.4671	TRUE	exclusion
ENSG00000181513	ACBD4	41	17:43221218-43221539	+	TE	0.2982	0.77114	-0.47294	0.928	K2	1	TRUE	exclusion
ENSG00000181555	SETD2	5	3:47165278-47165740	-	TS	0.62553	0.87591	-0.25038	0.924	K2	0.9261	TRUE	exclusion
ENSG00000181555	SETD2	7	3:47161973-47165025	-	TS	0.37262	0.12357	0.24906	0.923	K2	0.9261	TRUE	inclusion
ENSG00000181666	ZNF875	62	19:37854767-37854831	+	TE	0.84978	0.13087	0.71891	0.997	K4	1.677	TRUE	inclusion
ENSG00000181666	ZNF875	63	19:37854832-37855347	+	TE	0.14105	0.52028	-0.37923	0.946	K4	1.677	TRUE	exclusion
ENSG00000181929	PRKAG1	13	12:49412515-49412526	-	TS	0.049787	0.70232	-0.65253	0.921	K4	1.0204	TRUE	exclusion
ENSG00000182054	IDH2	14	15:90627409-90627585	-	TE	0.50548	0.10745	0.39803	0.985	K2	1.4265	TRUE	inclusion
ENSG00000182054	IDH2	15	15:90627246-90627408	-	TE	0.078215	0.60266	-0.52444	0.997	K2	1.4265	TRUE	exclusion
ENSG00000182057	OGFRP1	1	22:42665759-42665765	+	TS	0.099992	0.77794	-0.67795	0.938	K2	0	TRUE	exclusion
ENSG00000182057	OGFRP1	2	22:42665766-42665773	+	TS	0.89863	0.22055	0.67808	0.932	K2	0	TRUE	inclusion
ENSG00000182378	PLCXD1	29	X:219504-220020	+	TE	0.1402	0.88084	-0.74064	0.999	K1	0.0002	TRUE	exclusion
ENSG00000182378	PLCXD1	30	X:220021-220023	+	TE	0.86207	0.1213	0.74076	1	K1	0.0002	TRUE	inclusion
ENSG00000182541	LIMK2	34	22:31674724-31675720	+	TE	0.50543	0.17184	0.33359	0.913	K2	0.879	TRUE	inclusion
ENSG00000182899	RPL35A	16	3:197680532-197680873	+	RI	0.49752	0.8334	-0.33589	0.944	K1	1	TRUE	exclusion
ENSG00000183172	SMDT1	7	22:42479123-42479357	+	TE	0.077471	0.59545	-0.51798	0.996	K1	0.9535	TRUE	exclusion
ENSG00000183172	SMDT1	8	22:42479358-42480288	+	TE	0.92619	0.40745	0.51874	0.999	K1	0.9535	TRUE	inclusion
ENSG00000183281	PLGLB1	10	2:87239748-87240127	-	TE	0.86884	0.19397	0.67487	1	K2	0.4575	TRUE	inclusion
ENSG00000183281	PLGLB1	11	2:87239435-87239747	-	TE	0.13446	0.79982	-0.66536	0.998	K2	0.4575	TRUE	exclusion
ENSG00000183283	DAZAP2	32	12:51636216-51636235	+	TE	0.051005	0.78136	-0.73035	0.959	K4	2.2237	TRUE	exclusion
ENSG00000183283	DAZAP2	34	12:51636259-51636294	+	TE	0.27654	0.048223	0.22832	0.981	K4	2.2237	TRUE	inclusion
ENSG00000183308	NA	1	2:201827986-201828021	+	TS	0.16399	0.76741	-0.60342	0.988	K1	0.9538	TRUE	exclusion
ENSG00000183308	NA	2	2:201828022-201828353	+	TS	0.83406	0.23308	0.60097	0.987	K1	0.9538	TRUE	inclusion
ENSG00000184792	OSBP2	50	22:31302702-31302759	+	TE	0.52237	0.1124	0.40997	0.98	K4	1.4208	TRUE	inclusion
ENSG00000185090	MANEAL	11	1:38265894-38266120	+	TE	0.050472	0.42099	-0.37052	0.97	K2	1.305	TRUE	exclusion
ENSG00000185090	MANEAL	12	1:38266121-38266805	+	TE	0.90887	0.51833	0.39054	0.987	K2	1.305	TRUE	inclusion
ENSG00000185129	PURA	4	5:139493708-139493845	+	TE	0.83848	0.10105	0.73743	1	K2	0.6023	TRUE	inclusion
ENSG00000185442	FAM174B	1	15:93353092-93353114	-	TS	0.10411	0.43027	-0.32616	0.963	K2	0.9702	TRUE	exclusion
ENSG00000185442	FAM174B	2	15:93353029-93353091	-	TS	0.89163	0.58005	0.31158	0.946	K2	0.9702	TRUE	inclusion
ENSG00000185527	PDE6G	9	17:79617993-79618180	-	TE	0.58655	0.12162	0.46493	0.994	K2	1.5282	TRUE	inclusion
ENSG00000185527	PDE6G	10	17:79617955-79617992	-	TE	0.084645	0.42067	-0.33602	0.933	K2	1.5282	TRUE	exclusion
ENSG00000185758	CLDN24	1	4:184243562-184243579	-	TS	0.1049	0.8872	-0.78229	1	K1	0	TRUE	exclusion
ENSG00000185758	CLDN24	2	4:184242965-184243561	-	TS	0.89674	0.11316	0.78358	1	K1	0	TRUE	inclusion
ENSG00000186141	POLR3C	1	1:145610938-145611025	-	TS	0.14308	0.39881	-0.25573	0.912	K2	1.2288	TRUE	exclusion
ENSG00000186141	POLR3C	2	1:145610885-145610937	-	TS	0.85967	0.57187	0.2878	0.916	K2	1.2288	TRUE	inclusion
ENSG00000186318	BACE1	29	11:117156402-117156421	-	TE	0.70742	0.93618	-0.22876	0.947	K3	1.1071	TRUE	exclusion
ENSG00000187051	RPS19BP1	19	22:39925098-39925101	-	TE	0.89612	0.23715	0.65897	0.92	K3	0	TRUE	inclusion
ENSG00000187889	FYB2	28	1:57184544-57185322	-	TE	0.90822	0.37554	0.53268	0.943	K2	0.9987	TRUE	inclusion
ENSG00000187889	FYB2	29	1:57184477-57184543	-	TE	0.091225	0.62287	-0.53164	0.935	K2	0.9987	TRUE	exclusion
ENSG00000188315	C3orf62	11	3:49306219-49308635	-	TE	0.0076602	0.25082	-0.24316	0.901	K2	1.2169	TRUE	exclusion
ENSG00000188825	LINC00910	17	17:41454575-41454942	-	TE	0.12601	0.45565	-0.32963	0.952	K2	0.9914	TRUE	exclusion
ENSG00000188825	LINC00910	18	17:41453296-41454574	-	TE	0.88449	0.55108	0.33341	0.957	K2	0.9914	TRUE	inclusion
ENSG00000189057	FAM111B	9	11:58893910-58894867	+	TE	0.051192	0.70234	-0.65115	0.977	K2	1.3861	TRUE	exclusion
ENSG00000189057	FAM111B	10	11:58894868-58894883	+	TE	0.90587	0.21276	0.69311	0.943	K2	1.3861	TRUE	inclusion
ENSG00000189129	PLAC9	10	10:81904821-81905115	+	TE	0.89552	0.20677	0.68875	1	K2	0.7873	TRUE	inclusion
ENSG00000189308	LIN54	32	4:83846868-83848712	-	TE	0.89948	0.16632	0.73315	1	K3	0.8615	TRUE	inclusion
ENSG00000189308	LIN54	33	4:83846701-83846867	-	TE	0.1017	0.72678	-0.62508	0.999	K3	0.8615	TRUE	exclusion
ENSG00000189377	CXCL17	6	19:42932685-42933133	-	TE	0.86826	0.35785	0.51041	0.947	K1	0.8723	TRUE	inclusion
ENSG00000189377	CXCL17	7	19:42932440-42932684	-	TE	0.1201	0.64636	-0.52627	0.952	K1	0.8723	TRUE	exclusion
ENSG00000196151	WDSUB1	17	2:160092345-160092701	-	TE	0.075102	0.9068	-0.8317	1	K2	0	TRUE	exclusion
ENSG00000196151	WDSUB1	18	2:160092312-160092344	-	TE	0.92628	0.094187	0.83209	1	K2	0	TRUE	inclusion
ENSG00000196428	TSC22D2	12	3:150176467-150176648	+	TE	0.65978	0.078183	0.5816	0.999	K3	1.3177	TRUE	inclusion
ENSG00000196517	SLC6A9	36	1:44457503-44457664	-	TE	0.1933	0.5482	-0.3549	0.9	K1	0.9945	TRUE	exclusion
ENSG00000196652	ZKSCAN5	12	7:99130303-99131407	+	TE	0.23089	0.67378	-0.44289	0.951	K2	1.5534	TRUE	exclusion
ENSG00000196655	TRAPPC4	24	11:118894105-118894131	+	TE	0.88856	0.10232	0.78623	1	K4	0.0926	TRUE	inclusion
ENSG00000196655	TRAPPC4	31	11:118894385-118894844	+	TE	0.1154	0.89437	-0.77897	1	K4	0.0926	TRUE	exclusion
ENSG00000197150	ABCB8	62	7:150742651-150744869	+	TE	0.8802	0.45092	0.42928	0.924	K2	1.4908	TRUE	inclusion
ENSG00000197321	SVIL	67	10:29746267-29746276	-	TE	0.036664	0.64177	-0.60511	0.96	K2	1.3502	TRUE	exclusion
ENSG00000197361	FBXL22	7	15:63893495-63893804	+	TE	0.064647	0.4702	-0.40555	0.981	K2	0.9958	TRUE	exclusion
ENSG00000197361	FBXL22	9	15:63894619-63894627	+	TE	0.93717	0.52288	0.41429	0.993	K2	0.9958	TRUE	inclusion
ENSG00000198231	DDX42	54	17:61896295-61896459	+	TE	0.48583	0.14277	0.34306	0.961	K3	1.0141	TRUE	inclusion
ENSG00000198231	DDX42	56	17:61896570-61896607	+	TE	0.13658	0.55673	-0.42015	0.964	K3	1.0141	TRUE	exclusion
ENSG00000198363	ASPH	82	8:62413788-62416068	-	TE	0.5222	0.89353	-0.37133	0.973	K1	0.9979	TRUE	exclusion
ENSG00000198363	ASPH	83	8:62413116-62413787	-	TE	0.48146	0.10363	0.37783	0.969	K1	0.9979	TRUE	inclusion
ENSG00000198715	GLMP	31	1:156261298-156261341	-	TS	0.07747	0.46997	-0.3925	0.921	K1	0.9416	TRUE	exclusion
ENSG00000198715	GLMP	32	1:156261194-156261297	-	TS	0.9245	0.52832	0.39618	0.92	K1	0.9416	TRUE	inclusion
ENSG00000198756	COLGALT2	18	1:183898988-183899423	-	TE	0.10864	0.3701	-0.26146	0.931	K1	0.923	TRUE	exclusion
ENSG00000198756	COLGALT2	19	1:183898796-183898987	-	TE	0.88691	0.62542	0.26149	0.919	K1	0.923	TRUE	inclusion
ENSG00000198814	GK	39	X:30746849-30747287	+	TE	0.36631	0.82791	-0.4616	0.918	K2	0.9329	TRUE	exclusion
ENSG00000198814	GK	41	X:30747367-30748725	+	TE	0.63646	0.17667	0.4598	0.91	K2	0.9329	TRUE	inclusion
ENSG00000198925	ATG9A	55	2:220084104-220084775	-	TE	0.88983	0.59824	0.29159	0.922	K3	1.4662	TRUE	inclusion
ENSG00000203734	ECT2L	27	6:139223637-139223905	+	TE	0.45735	0.21406	0.24329	0.903	K1	0.9933	TRUE	inclusion
ENSG00000203734	ECT2L	28	6:139223906-139225207	+	TE	0.54307	0.78633	-0.24326	0.915	K1	0.9933	TRUE	exclusion
ENSG00000203808	BVES-AS1	11	6:105616614-105616776	+	TE	0.55962	0.13277	0.42685	0.918	K2	1.2657	TRUE	inclusion
ENSG00000203808	BVES-AS1	12	6:105616777-105616858	+	TE	0.078259	0.40082	-0.32256	0.915	K2	1.2657	TRUE	exclusion
ENSG00000204130	RUFY2	41	10:70103584-70104901	-	TE	0.1426	0.029259	0.11334	0.908	K2	1.5259	TRUE	inclusion
ENSG00000204264	PSMB8	1	6:32812429-32812480	-	TS	0.11831	0.90054	-0.78223	1	K1	0	TRUE	exclusion
ENSG00000204264	PSMB8	2	6:32812056-32812428	-	TS	0.87747	0.10251	0.77496	1	K1	0	TRUE	inclusion
ENSG00000204802	NA	1	9:46688085-46688137	-	TS	0.91679	0.19615	0.72065	0.907	K2	0.9538	TRUE	inclusion
ENSG00000204802	NA	2	9:46688082-46688084	-	TS	0.083601	0.58876	-0.50515	0.913	K2	0.9538	TRUE	exclusion
ENSG00000204922	UQCC3	4	11:62439425-62441049	+	TE	0.034554	0.32786	-0.29331	0.965	K1	0.9992	TRUE	exclusion
ENSG00000204922	UQCC3	5	11:62441050-62441159	+	TE	0.966	0.67308	0.29292	0.953	K1	0.9992	TRUE	inclusion
ENSG00000204934	ATP6V0E2-AS1	7	7:149564861-149566947	-	TE	0.88724	0.077538	0.8097	1	K1	0	TRUE	inclusion
ENSG00000204934	ATP6V0E2-AS1	8	7:149564786-149564860	-	TE	0.11668	0.92161	-0.80493	1	K1	0	TRUE	exclusion
ENSG00000204941	PSG5	21	19:43671924-43672273	-	TE	0.080114	0.37618	-0.29607	0.971	K2	0.9342	TRUE	exclusion
ENSG00000204941	PSG5	22	19:43671895-43671923	-	TE	0.92175	0.61932	0.30243	0.975	K2	0.9342	TRUE	inclusion
ENSG00000213199	ASIC3	3	7:150745775-150745853	+	TS	0.86675	0.081256	0.78549	1	K3	0.3898	TRUE	inclusion
ENSG00000213199	ASIC3	5	7:150745973-150746506	+	TS	0.13679	0.90087	-0.76407	1	K3	0.3898	TRUE	exclusion
ENSG00000213347	MXD3	22	5:176734209-176734435	-	TE	0.083598	0.86302	-0.77942	1	K2	0.0001	TRUE	exclusion
ENSG00000213347	MXD3	23	5:176734206-176734208	-	TE	0.91584	0.13888	0.77696	1	K2	0.0001	TRUE	inclusion
ENSG00000213639	PPP1CB	25	2:29022065-29024514	+	TE	0.64694	0.89827	-0.25133	0.955	K2	0.9552	TRUE	exclusion
ENSG00000213639	PPP1CB	26	2:29024515-29025796	+	TE	0.35469	0.10416	0.25052	0.952	K2	0.9552	TRUE	inclusion
ENSG00000214013	GANC	1	15:42565431-42565483	+	TS	0.89964	0.11897	0.78068	0.999	K2	1.0017	TRUE	inclusion
ENSG00000214013	GANC	2	15:42565484-42565492	+	TS	0.096149	0.84814	-0.75199	1	K2	1.0017	TRUE	exclusion
ENSG00000214021	TTLL3	47	3:9861978-9862032	+	TS	0.36015	0.11094	0.24921	0.914	K2	0.881	TRUE	inclusion
ENSG00000214029	ZNF891	3	12:133696870-133698504	-	TE	0.090254	0.53597	-0.44571	0.981	K1	0.977	TRUE	exclusion
ENSG00000214029	ZNF891	4	12:133694740-133696869	-	TE	0.90921	0.45834	0.45087	0.981	K1	0.977	TRUE	inclusion
ENSG00000214694	ARHGEF33	34	2:39201011-39201084	+	TE	0.42831	0.11743	0.31088	0.911	K2	1.0225	TRUE	inclusion
ENSG00000215241	LINC02449	2	12:8388478-8388525	+	TS	0.094831	0.76615	-0.67132	0.944	K2	0.1744	TRUE	exclusion
ENSG00000215241	LINC02449	3	12:8388526-8388595	+	TS	0.9027	0.23389	0.6688	0.944	K2	0.1744	TRUE	inclusion
ENSG00000221914	PPP2R2A	53	8:26227650-26227830	+	TE	0.8981	0.097247	0.80085	1	K3	0.9594	TRUE	inclusion
ENSG00000221914	PPP2R2A	54	8:26227831-26227840	+	TE	0.097304	0.60477	-0.50746	0.999	K3	0.9594	TRUE	exclusion
ENSG00000221914	PPP2R2A	59	8:26228646-26230196	+	TE	0.10866	0.41119	-0.30253	0.95	K3	0.9594	TRUE	exclusion
ENSG00000222047	C10orf55	6	10:75669736-75671853	-	TE	0.99548	0.75083	0.24465	0.923	K1	0.9978	TRUE	inclusion
ENSG00000222047	C10orf55	7	10:75669727-75669735	-	TE	0.004649	0.24895	-0.2443	0.929	K1	0.9978	TRUE	exclusion
ENSG00000225484	NUTM2B-AS1	2	10:81586241-81586272	-	TS	0.20407	0.49029	-0.28622	0.921	K3	1.5931	TRUE	exclusion
ENSG00000227039	ITGB2-AS1	15	21:46347860-46347885	+	TE	0.12016	0.8899	-0.76974	1	K3	0.1134	TRUE	exclusion
ENSG00000227039	ITGB2-AS1	17	21:46347944-46349593	+	TE	0.87977	0.097995	0.78178	1	K3	0.1134	TRUE	inclusion
ENSG00000227165	WDR11-AS1	11	10:122522913-122523187	-	TE	0.088041	0.4821	-0.39406	0.908	K1	0.682	TRUE	exclusion
ENSG00000228363	NA	1	2:86789193-86789197	+	TS	0.86771	0.10689	0.76081	1	K1	0	TRUE	inclusion
ENSG00000228363	NA	2	2:86789198-86789370	+	TS	0.13881	0.89366	-0.75484	1	K1	0	TRUE	exclusion
ENSG00000228363	NA	12	2:86844473-86844564	+	TE	0.040095	0.34232	-0.30222	0.933	K2	1.3157	TRUE	exclusion
ENSG00000229036	VDAC1P8	18	6:143827240-143827284	+	TE	0.013668	0.23303	-0.21936	0.951	K3	1.5657	TRUE	exclusion
ENSG00000229036	VDAC1P8	22	6:143827544-143828464	+	TE	0.78984	0.37462	0.41523	0.944	K3	1.5657	TRUE	inclusion
ENSG00000229227	NA	4	10:46947328-46947520	-	TS	0.1679	0.44042	-0.27252	0.916	K3	1.6538	TRUE	exclusion
ENSG00000230055	NA	8	17:36889969-36891274	+	TE	0.0054187	0.2628	-0.25738	0.947	K2	0.9936	TRUE	exclusion
ENSG00000230055	NA	9	17:36891275-36891297	+	TE	0.99453	0.73705	0.25748	0.952	K2	0.9936	TRUE	inclusion
ENSG00000230366	DSCR9	13	21:38593844-38594037	+	TE	0.074308	0.89463	-0.82033	1	K3	0.012	TRUE	exclusion
ENSG00000231064	THBS3-AS1	17	1:155174826-155175097	+	TE	0.69295	0.26685	0.4261	0.94	K2	1.5252	TRUE	inclusion
ENSG00000231064	THBS3-AS1	18	1:155175098-155175158	+	TE	0.21719	0.51678	-0.2996	0.905	K2	1.5252	TRUE	exclusion
ENSG00000231187	NA	1	10:46951472-46951552	+	TS	0.070915	0.45486	-0.38394	0.917	K1	0.9729	TRUE	exclusion
ENSG00000231187	NA	2	10:46951553-46951783	+	TS	0.93038	0.54633	0.38405	0.915	K1	0.9729	TRUE	inclusion
ENSG00000231889	TRAF3IP2-AS1	24	6:111897794-111897944	+	TE	0.73542	0.080111	0.65531	0.997	K3	1.1947	TRUE	inclusion
ENSG00000231889	TRAF3IP2-AS1	25	6:111897945-111897956	+	TE	0.12663	0.70293	-0.5763	1	K3	1.1947	TRUE	exclusion
ENSG00000232098	NA	5	19:58917926-58918137	-	TE	0.43023	0.10817	0.32206	0.97	K1	0.977	TRUE	inclusion
ENSG00000232098	NA	6	19:58917763-58917925	-	TE	0.57805	0.88721	-0.30917	0.966	K1	0.977	TRUE	exclusion
ENSG00000232112	TMA7	8	3:48485256-48485611	+	TE	0.87673	0.11704	0.75969	0.999	K1	0	TRUE	inclusion
ENSG00000232112	TMA7	9	3:48485612-48485616	+	TE	0.12264	0.88381	-0.76117	1	K1	0	TRUE	exclusion
ENSG00000234377	OBI1-AS1	30	13:79190098-79191460	+	TE	0.71497	0.34401	0.37096	0.93	K2	1.4069	TRUE	inclusion
ENSG00000234377	OBI1-AS1	31	13:79191461-79191463	+	TE	0.26575	0.62875	-0.363	0.914	K2	1.4069	TRUE	exclusion
ENSG00000235066	NA	9	2:118770070-118770258	+	TE	0.49996	0.10226	0.3977	0.97	K1	1	TRUE	inclusion
ENSG00000235066	NA	10	2:118770259-118770295	+	TE	0.49993	0.90155	-0.40163	0.987	K1	1	TRUE	exclusion
ENSG00000235453	SMIM27	12	9:32566389-32566927	+	TE	0.80946	0.34299	0.46647	0.94	K1	0.9952	TRUE	inclusion
ENSG00000235453	SMIM27	13	9:32566928-32567003	+	TE	0.19334	0.65816	-0.46482	0.929	K1	0.9952	TRUE	exclusion
ENSG00000237054	PRMT5-AS1	1	14:23388665-23388829	+	TS	0.1231	0.67004	-0.54693	0.992	K1	0.9175	TRUE	exclusion
ENSG00000237054	PRMT5-AS1	2	14:23388830-23389407	+	TS	0.88089	0.3258	0.55508	0.991	K1	0.9175	TRUE	inclusion
ENSG00000237649	KIFC1	1	6:33359313-33359637	+	TS	0.66219	0.11075	0.55144	0.996	K1	0.935	TRUE	inclusion
ENSG00000237649	KIFC1	2	6:33359638-33359774	+	TS	0.33218	0.89477	-0.56258	0.999	K1	0.935	TRUE	exclusion
ENSG00000237765	FAM200B	7	4:15683379-15683379	+	TS	0.054613	0.35363	-0.29902	0.913	K3	1	TRUE	exclusion
ENSG00000237765	FAM200B	8	4:15683380-15683407	+	TS	0.9437	0.64719	0.2965	0.92	K3	1	TRUE	inclusion
ENSG00000240499	NA	11	7:122019243-122019272	+	TE	0.12391	0.55759	-0.43368	0.913	K2	0.9999	TRUE	exclusion
ENSG00000241343	RPL36A	22	X:100650783-100650783	+	TE	0.89072	0.1178	0.77292	1	K3	0.0349	TRUE	inclusion
ENSG00000241343	RPL36A	23	X:100650784-100651105	+	TE	0.10871	0.87848	-0.76977	1	K3	0.0349	TRUE	exclusion
ENSG00000241563	CORT	1	1:10509776-10509970	+	TS	0.73134	0.28172	0.44963	0.932	K1	0.9918	TRUE	inclusion
ENSG00000241563	CORT	2	1:10509971-10510379	+	TS	0.2659	0.71977	-0.45387	0.929	K1	0.9918	TRUE	exclusion
ENSG00000241563	CORT	3	1:10511434-10511955	+	TE	0.10801	0.88572	-0.77771	1	K1	0	TRUE	exclusion
ENSG00000241563	CORT	4	1:10511956-10511959	+	TE	0.89131	0.11108	0.78023	1	K1	0	TRUE	inclusion
ENSG00000243415	NA	1	3:145781829-145781905	+	TS	0.25347	0.69522	-0.44176	0.95	K1	0.9651	TRUE	exclusion
ENSG00000243415	NA	2	3:145781906-145782037	+	TS	0.74724	0.30765	0.43959	0.935	K1	0.9651	TRUE	inclusion
ENSG00000243649	CFB	60	6:31919826-31919830	+	TE	0.68388	0.22761	0.45627	0.916	K2	0.9917	TRUE	inclusion
ENSG00000245080	MIR3150BHG	6	8:96081152-96081463	-	TE	0.34184	0.071073	0.27076	0.938	K1	0.9964	TRUE	inclusion
ENSG00000245080	MIR3150BHG	7	8:96079036-96081151	-	TE	0.65659	0.92843	-0.27184	0.916	K1	0.9964	TRUE	exclusion
ENSG00000247324	NA	5	16:71497836-71497970	+	TE	0.87407	0.099269	0.7748	1	K1	0.3595	TRUE	inclusion
ENSG00000247324	NA	6	16:71497971-71499844	+	TE	0.12632	0.90062	-0.7743	1	K1	0.3595	TRUE	exclusion
ENSG00000249786	EAF1-AS1	27	3:15480571-15480684	-	TE	0.11161	0.8877	-0.77609	1	K1	0.1179	TRUE	exclusion
ENSG00000249786	EAF1-AS1	28	3:15480153-15480570	-	TE	0.89395	0.11384	0.78011	1	K1	0.1179	TRUE	inclusion
ENSG00000249915	PDCD6	22	5:314802-314921	+	TE	0.47521	0.071819	0.40339	0.965	K3	0.9782	TRUE	inclusion
ENSG00000249915	PDCD6	23	5:314922-315069	+	TE	0.52054	0.93274	-0.41221	0.976	K3	0.9782	TRUE	exclusion
ENSG00000253669	GASAL1	3	8:103821162-103821794	+	TE	0.67213	0.27907	0.39307	0.906	K1	0.9859	TRUE	inclusion
ENSG00000253669	GASAL1	4	8:103821795-103822199	+	TE	0.33492	0.72503	-0.39011	0.921	K1	0.9859	TRUE	exclusion
ENSG00000253982	NA	5	8:1710247-1710790	-	TE	0.42511	0.0364	0.38871	0.939	K2	0.9901	TRUE	inclusion
ENSG00000253982	NA	6	8:1710156-1710246	-	TE	0.57789	0.96444	-0.38655	0.947	K2	0.9901	TRUE	exclusion
ENSG00000254505	CHMP4A	4	14:24682639-24682694	-	TS	0.86535	0.11519	0.75015	0.999	K3	0	TRUE	inclusion
ENSG00000254505	CHMP4A	5	14:24682615-24682638	-	TS	0.1303	0.88791	-0.75761	1	K3	0	TRUE	exclusion
ENSG00000256824	NA	3	11:63870666-63870985	+	TE	0.67793	0.89113	-0.2132	0.901	K1	0.8484	TRUE	exclusion
ENSG00000256824	NA	4	11:63870986-63871125	+	TE	0.31852	0.1048	0.21372	0.906	K1	0.8484	TRUE	inclusion
ENSG00000257727	CNPY2	16	12:56708292-56708433	-	TE	0.27762	0.87991	-0.60229	0.975	K2	0.9786	TRUE	exclusion
ENSG00000257727	CNPY2	17	12:56708274-56708291	-	TE	0.72246	0.10582	0.61664	0.982	K2	0.9786	TRUE	inclusion
ENSG00000261801	LOXL1-AS1	6	15:74220128-74220281	-	TS	0.022234	0.12449	-0.10226	0.942	K3	1.0563	TRUE	exclusion
ENSG00000267053	NA	1	19:36795482-36795522	+	TS	0.68161	0.07554	0.60607	1	K1	0.8665	TRUE	inclusion
ENSG00000267053	NA	2	19:36795523-36795714	+	TS	0.32096	0.92343	-0.60246	1	K1	0.8665	TRUE	exclusion
ENSG00000267106	ZNF561-AS1	15	19:9745398-9745538	+	TE	0.86142	0.36431	0.49711	0.912	K3	0.6391	TRUE	inclusion
ENSG00000268750	NA	11	19:58369946-58370009	+	TE	0.86082	0.11418	0.74664	1	K3	0.3395	TRUE	inclusion
ENSG00000268750	NA	13	19:58370182-58370279	+	TE	0.13195	0.8838	-0.75185	1	K3	0.3395	TRUE	exclusion
ENSG00000268894	PLCE1-AS1	8	10:96039062-96040088	-	TE	0.035724	0.40375	-0.36803	0.917	K1	0.9973	TRUE	exclusion
ENSG00000268895	A1BG-AS1	17	19:58866091-58866549	+	TE	0.16305	0.74457	-0.58152	0.92	K3	1.0973	TRUE	exclusion
ENSG00000269427	NA	1	19:16741554-16741562	+	TS	0.054604	0.5638	-0.50919	0.9	K1	0.9722	TRUE	exclusion
ENSG00000269427	NA	2	19:16741563-16741919	+	TS	0.9435	0.43741	0.50609	0.907	K1	0.9722	TRUE	inclusion
ENSG00000269985	NA	1	6:5458267-5458308	-	TS	0.80614	0.077682	0.72846	1	K1	0.4843	TRUE	inclusion
ENSG00000269985	NA	2	6:5458127-5458266	-	TS	0.19646	0.92002	-0.72357	1	K1	0.4843	TRUE	exclusion
ENSG00000000457	SCYL3	20	1:169822215-169822913	-	TE	0.0041539	0.0053796	-0.0012258	0.563	K2	0.898	FALSE	exclusion
ENSG00000000457	SCYL3	21	1:169821804-169822214	-	TE	0.78795	0.7792	0.0087502	0.551	K2	0.898	FALSE	inclusion
ENSG00000000457	SCYL3	22	1:169818772-169821803	-	TE	0.21165	0.22027	-0.0086204	0.521	K2	0.898	FALSE	exclusion
ENSG00000000460	C1orf112	46	1:169821931-169822226	+	TE	0.068816	0.042612	0.026204	0.565	K1	0.6307	FALSE	inclusion
ENSG00000000460	C1orf112	47	1:169822227-169823221	+	TE	0.93122	0.95699	-0.025779	0.567	K1	0.6307	FALSE	exclusion
ENSG00000001036	FUCA2	1	6:143832800-143832827	-	TS	0.13113	0.098708	0.032421	0.563	K1	0	FALSE	inclusion
ENSG00000001036	FUCA2	2	6:143832548-143832799	-	TS	0.87222	0.89408	-0.021866	0.538	K1	0	FALSE	exclusion
ENSG00000001630	CYP51A1	17	7:91743008-91743157	-	TE	0.12378	0.3437	-0.21993	0.675	K2	1.4768	FALSE	exclusion
ENSG00000001630	CYP51A1	18	7:91742899-91743007	-	TE	0.20525	0.080057	0.12519	0.722	K2	1.4768	FALSE	inclusion
ENSG00000001630	CYP51A1	19	7:91742726-91742898	-	TE	0.39158	0.27441	0.11717	0.55	K2	1.4768	FALSE	inclusion
ENSG00000001630	CYP51A1	20	7:91741465-91742725	-	TE	0.39198	0.4565	-0.064519	0.564	K2	1.4768	FALSE	exclusion
ENSG00000001631	KRIT1	1	7:91875415-91875480	-	TS	0.089464	0.1401	-0.050637	0.594	K4	0.9117	FALSE	exclusion
ENSG00000001631	KRIT1	2	7:91875374-91875414	-	TS	0.094852	0.14132	-0.046464	0.645	K4	0.9117	FALSE	exclusion
ENSG00000001631	KRIT1	3	7:91875258-91875373	-	TS	0.09014	0.13405	-0.04391	0.629	K4	0.9117	FALSE	exclusion
ENSG00000001631	KRIT1	4	7:91875245-91875257	-	TS	0.095442	0.14314	-0.047699	0.612	K4	0.9117	FALSE	exclusion
ENSG00000001631	KRIT1	5	7:91875239-91875244	-	TS	0.093236	0.13634	-0.043108	0.596	K4	0.9117	FALSE	exclusion
ENSG00000001631	KRIT1	6	7:91875238-91875238	-	TS	0.090695	0.13401	-0.043312	0.633	K4	0.9117	FALSE	exclusion
ENSG00000001631	KRIT1	7	7:91875235-91875237	-	TS	0.091131	0.14565	-0.054519	0.627	K4	0.9117	FALSE	exclusion
ENSG00000001631	KRIT1	8	7:91875230-91875234	-	TS	0.086923	0.13778	-0.050856	0.587	K4	0.9117	FALSE	exclusion
ENSG00000001631	KRIT1	9	7:91875229-91875229	-	TS	0.097216	0.13939	-0.042179	0.566	K4	0.9117	FALSE	exclusion
ENSG00000001631	KRIT1	10	7:91875227-91875228	-	TS	0.64062	0.70129	-0.06067	0.607	K4	0.9117	FALSE	exclusion
ENSG00000001631	KRIT1	11	7:91875220-91875226	-	TS	0.36131	0.2823	0.079011	0.66	K4	0.9117	FALSE	inclusion
ENSG00000002016	RAD52	30	12:1036113-1036310	-	RI	0.86245	0.89928	-0.03683	0.579	K0	0	FALSE	exclusion
ENSG00000002016	RAD52	39	12:1025699-1025701	-	AA	0.88007	0.8729	0.0071775	0.508	K0	0	FALSE	inclusion
ENSG00000002016	RAD52	40	12:1025650-1025698	-	AA	0.91121	0.87842	0.032791	0.591	K0	0	FALSE	inclusion
ENSG00000002016	RAD52	41	12:1025510-1025649	-	CE	0.90053	0.87268	0.027848	0.578	K0	0	FALSE	inclusion
ENSG00000002016	RAD52	48	12:1022525-1022618	-	TE	0.022987	0.32709	-0.3041	0.534	K4	1.5073	FALSE	exclusion
ENSG00000002016	RAD52	49	12:1022400-1022524	-	TE	0.022723	0.026798	-0.0040746	0.567	K4	1.5073	FALSE	exclusion
ENSG00000002016	RAD52	50	12:1022316-1022399	-	TE	0.59724	0.40915	0.18809	0.724	K4	1.5073	FALSE	inclusion
ENSG00000002016	RAD52	51	12:1021924-1022315	-	TE	0.080529	0.054973	0.025556	0.719	K4	1.5073	FALSE	inclusion
ENSG00000002016	RAD52	52	12:1021711-1021923	-	TE	0.022837	0.025501	-0.002664	0.541	K4	1.5073	FALSE	exclusion
ENSG00000002016	RAD52	53	12:1021661-1021710	-	TE	0.022006	0.025469	-0.0034638	0.532	K4	1.5073	FALSE	exclusion
ENSG00000002016	RAD52	54	12:1021655-1021660	-	TE	0.021881	0.028589	-0.0067087	0.562	K4	1.5073	FALSE	exclusion
ENSG00000002016	RAD52	55	12:1021321-1021654	-	TE	0.022913	0.057045	-0.034132	0.593	K4	1.5073	FALSE	exclusion
ENSG00000002016	RAD52	56	12:1021243-1021320	-	TE	0.34428	0.22888	0.1154	0.753	K4	1.5073	FALSE	inclusion
ENSG00000002549	LAP3	30	4:17609023-17609557	+	TE	0.92056	0.87507	0.045495	0.615	K2	0	FALSE	inclusion
ENSG00000002549	LAP3	31	4:17609558-17609591	+	TE	0.078217	0.12378	-0.045565	0.631	K2	0	FALSE	exclusion
ENSG00000002549	LAP3	32	4:17609592-17609595	+	TE	0.081336	0.12398	-0.042645	0.601	K2	0	FALSE	exclusion
ENSG00000002745	WNT16	5	7:120978935-120979512	+	TE	0.54528	0.61976	-0.074482	0.584	K1	0.9999	FALSE	exclusion
ENSG00000002745	WNT16	6	7:120979513-120981158	+	TE	0.44987	0.38091	0.068956	0.582	K1	0.9999	FALSE	inclusion
ENSG00000002746	HECW1	50	7:43601414-43601651	+	TE	0.49695	0.29337	0.20359	0.653	K1	0.9905	FALSE	inclusion
ENSG00000002746	HECW1	51	7:43601652-43605600	+	TE	0.50088	0.70535	-0.20447	0.677	K1	0.9905	FALSE	exclusion
ENSG00000003056	M6PR	32	12:9093466-9093499	-	AA	0.97394	0.95211	0.021833	0.637	K0	0	FALSE	inclusion
ENSG00000003056	M6PR	33	12:9093347-9093465	-	TE	0.2164	0.30734	-0.090936	0.532	K2	0.9502	FALSE	exclusion
ENSG00000003056	M6PR	34	12:9092961-9093346	-	TE	0.0099052	0.020003	-0.010097	0.68	K2	0.9502	FALSE	exclusion
ENSG00000003056	M6PR	35	12:9092959-9092960	-	TE	0.78318	0.69228	0.090905	0.526	K2	0.9502	FALSE	inclusion
ENSG00000003249	DBNDD1	11	16:90072888-90072900	-	TE	0.11178	0.10324	0.0085386	0.507	K3	0.8092	FALSE	inclusion
ENSG00000003249	DBNDD1	12	16:90072627-90072887	-	TE	0.11129	0.1027	0.008585	0.519	K3	0.8092	FALSE	inclusion
ENSG00000003249	DBNDD1	13	16:90072597-90072626	-	TE	0.42358	0.321	0.10259	0.606	K3	0.8092	FALSE	inclusion
ENSG00000003249	DBNDD1	14	16:90071281-90072596	-	TE	0.2144	0.42736	-0.21296	0.615	K3	0.8092	FALSE	exclusion
ENSG00000003249	DBNDD1	15	16:90071273-90071280	-	TE	0.47756	0.35463	0.12293	0.601	K3	0.8092	FALSE	inclusion
ENSG00000003402	CFLAR	1	2:201980827-201980876	+	TS	0.043587	0.093056	-0.049469	0.643	K3	0.9616	FALSE	exclusion
ENSG00000003402	CFLAR	2	2:201980877-201980889	+	TS	0.043435	0.27548	-0.23205	0.549	K3	0.9616	FALSE	exclusion
ENSG00000003402	CFLAR	3	2:201980890-201980929	+	TS	0.044093	0.22662	-0.18253	0.665	K3	0.9616	FALSE	exclusion
ENSG00000003402	CFLAR	4	2:201980930-201980961	+	TS	0.042334	0.094146	-0.051811	0.666	K3	0.9616	FALSE	exclusion
ENSG00000003402	CFLAR	5	2:201980962-201981129	+	TS	0.27478	0.1888	0.085986	0.719	K3	0.9616	FALSE	inclusion
ENSG00000003402	CFLAR	6	2:201981130-201981204	+	TS	0.7265	0.48971	0.23679	0.709	K3	0.9616	FALSE	inclusion
ENSG00000003402	CFLAR	9	2:201983214-201983245	+	TS	0.12141	0.13798	-0.016577	0.512	K2	0	FALSE	exclusion
ENSG00000003402	CFLAR	10	2:201983246-201983386	+	TS	0.11797	0.141	-0.023028	0.555	K2	0	FALSE	exclusion
ENSG00000003402	CFLAR	11	2:201983387-201983624	+	TS	0.87363	0.86215	0.011478	0.521	K2	0	FALSE	inclusion
ENSG00000003402	CFLAR	32	2:202000921-202001004	+	TE	0.028284	0.018943	0.0093414	0.527	K2	0	FALSE	inclusion
ENSG00000003402	CFLAR	33	2:202001005-202001137	+	TE	0.027244	0.018985	0.0082588	0.543	K2	0	FALSE	inclusion
ENSG00000003402	CFLAR	34	2:202001138-202004600	+	TE	0.97088	0.98091	-0.010035	0.515	K2	0	FALSE	exclusion
ENSG00000003402	CFLAR	54	2:202028558-202028696	+	TE	0.0063115	0.0066854	-0.00037395	0.515	K3	0	FALSE	exclusion
ENSG00000003402	CFLAR	55	2:202028697-202028833	+	TE	0.0061879	0.0066741	-0.00048613	0.542	K3	0	FALSE	exclusion
ENSG00000003402	CFLAR	56	2:202028834-202028885	+	TE	0.0061847	0.006619	-0.00043428	0.506	K3	0	FALSE	exclusion
ENSG00000003402	CFLAR	57	2:202028886-202029001	+	TE	0.0063324	0.0065766	-0.00024417	0.514	K3	0	FALSE	exclusion
ENSG00000003402	CFLAR	58	2:202029002-202029002	+	TE	0.0061885	0.006639	-0.00045047	0.537	K3	0	FALSE	exclusion
ENSG00000003402	CFLAR	59	2:202029003-202041410	+	TE	0.9938	0.99326	0.00053616	0.528	K3	0	FALSE	inclusion
ENSG00000003509	NDUFAF7	33	2:37475278-37475400	+	AA	0.86807	0.86267	0.0054012	0.501	K0	0	FALSE	inclusion
ENSG00000004139	SARM1	23	17:26723046-26723175	+	RI	0.95239	0.931	0.021391	0.598	K0	0	FALSE	inclusion
ENSG00000004139	SARM1	26	17:26723280-26723430	+	TE	0.31987	0.13673	0.18314	0.756	K1	0.9899	FALSE	inclusion
ENSG00000004139	SARM1	27	17:26723431-26723839	+	TE	0.67864	0.86197	-0.18333	0.792	K1	0.9899	FALSE	exclusion
ENSG00000004139	SARM1	29	17:26725070-26725151	+	TE	0.0039884	0.0057858	-0.0017974	0.571	K2	0.1796	FALSE	exclusion
ENSG00000004139	SARM1	30	17:26725152-26725179	+	TE	0.97233	0.97971	-0.0073827	0.72	K2	0.1796	FALSE	exclusion
ENSG00000004139	SARM1	31	17:26725180-26728065	+	TE	0.027677	0.020406	0.0072711	0.693	K2	0.1796	FALSE	inclusion
ENSG00000004142	POLDIP2	14	17:26674203-26675257	-	TE	0.0057134	0.0082881	-0.0025746	0.622	K1	0	FALSE	exclusion
ENSG00000004142	POLDIP2	15	17:26673659-26674202	-	TE	0.99418	0.99185	0.0023365	0.584	K1	0	FALSE	inclusion
ENSG00000004478	FKBP4	11	12:2907993-2908253	+	RI	0.89962	0.87701	0.022613	0.581	K0	0	FALSE	inclusion
ENSG00000004487	KDM1A	29	1:23407939-23408066	+	CE	0.97229	0.95971	0.012582	0.591	K0	0	FALSE	inclusion
ENSG00000004487	KDM1A	30	1:23408067-23408712	+	RI	0.96396	0.94261	0.021353	0.599	K0	0	FALSE	inclusion
ENSG00000004487	KDM1A	31	1:23408713-23408859	+	CE	0.96118	0.93428	0.026895	0.604	K0	0	FALSE	inclusion
ENSG00000004487	KDM1A	32	1:23408860-23409671	+	RI	0.96291	0.94937	0.013535	0.584	K0	0	FALSE	inclusion
ENSG00000004487	KDM1A	33	1:23409672-23409847	+	TE	0.025847	0.035573	-0.0097267	0.558	K2	0.1436	FALSE	exclusion
ENSG00000004487	KDM1A	36	1:23410182-23410182	+	TE	0.045358	0.03841	0.0069483	0.59	K2	0.1436	FALSE	inclusion
ENSG00000004700	RECQL	30	12:21622736-21623280	-	TE	0.35715	0.29014	0.067008	0.61	K1	0.9992	FALSE	inclusion
ENSG00000004700	RECQL	31	12:21621845-21622735	-	TE	0.64291	0.71012	-0.067205	0.634	K1	0.9992	FALSE	exclusion
ENSG00000004776	HSPB6	7	19:36246284-36246584	-	TE	0.055696	0.083997	-0.028301	0.612	K2	1.1055	FALSE	exclusion
ENSG00000004776	HSPB6	8	19:36245470-36246283	-	TE	0.78321	0.76224	0.020966	0.56	K2	1.1055	FALSE	inclusion
ENSG00000004776	HSPB6	9	19:36245469-36245469	-	TE	0.21654	0.22434	-0.0077976	0.516	K2	1.1055	FALSE	exclusion
ENSG00000004897	CDC27	5	17:45266619-45266627	-	TS	0.094615	0.048795	0.04582	0.653	K3	2	FALSE	inclusion
ENSG00000004897	CDC27	6	17:45266618-45266618	-	TS	0.28558	0.22615	0.059431	0.655	K3	2	FALSE	inclusion
ENSG00000004897	CDC27	7	17:45266591-45266617	-	TS	0.30119	0.22635	0.074849	0.675	K3	2	FALSE	inclusion
ENSG00000004897	CDC27	8	17:45266543-45266590	-	TS	0.29674	0.22687	0.069871	0.669	K3	2	FALSE	inclusion
ENSG00000004897	CDC27	9	17:45266512-45266542	-	TS	0.29565	0.41761	-0.12196	0.567	K3	2	FALSE	exclusion
ENSG00000004897	CDC27	10	17:45266112-45266302	-	AF	0.07369	0.038225	0.035465	0.677	K0	0	FALSE	inclusion
ENSG00000004897	CDC27	18	17:45235572-45235669	-	CE	0.92456	0.96525	-0.04069	0.725	K0	0	FALSE	exclusion
ENSG00000004897	CDC27	24	17:45234279-45234349	-	CE	0.95653	0.97132	-0.014785	0.644	K0	0	FALSE	exclusion
ENSG00000004897	CDC27	25	17:45234013-45234081	-	AF	0.10615	0.039885	0.066268	0.769	K0	0	FALSE	inclusion
ENSG00000004897	CDC27	26	17:45232153-45232230	-	AA	0.10571	0.040763	0.064949	0.711	K0	0	FALSE	inclusion
ENSG00000005059	MCUB	17	4:110608671-110608872	+	TE	0.25404	0.29415	-0.04011	0.574	K1	0.9859	FALSE	exclusion
ENSG00000005059	MCUB	18	4:110608873-110609874	+	TE	0.74494	0.70748	0.037454	0.563	K1	0.9859	FALSE	inclusion
ENSG00000005075	POLR2J	6	7:102113910-102114131	-	TE	0.033985	0.15472	-0.12074	0.707	K1	0.9988	FALSE	exclusion
ENSG00000005075	POLR2J	7	7:102113565-102113909	-	TE	0.96639	0.84603	0.12036	0.705	K1	0.9988	FALSE	inclusion
ENSG00000005156	LIG3	56	17:33330193-33331291	+	RI	0.90278	0.87924	0.023545	0.527	K0	0	FALSE	inclusion
ENSG00000005156	LIG3	57	17:33331292-33331391	+	TE	0.051295	0.060404	-0.0091088	0.546	K2	0.9909	FALSE	exclusion
ENSG00000005156	LIG3	58	17:33331392-33331823	+	TE	0.15824	0.18862	-0.030386	0.532	K2	0.9909	FALSE	exclusion
ENSG00000005156	LIG3	59	17:33331824-33332083	+	TE	0.8413	0.80803	0.03327	0.508	K2	0.9909	FALSE	inclusion
ENSG00000005187	ACSM3	40	16:20807692-20807811	+	CE	0.91962	0.9126	0.0070179	0.524	K0	0	FALSE	inclusion
ENSG00000005187	ACSM3	41	16:20808208-20808251	+	TE	0.011067	0.014616	-0.0035493	0.571	K3	0.4505	FALSE	exclusion
ENSG00000005187	ACSM3	42	16:20808252-20808314	+	TE	0.94533	0.95809	-0.012761	0.625	K3	0.4505	FALSE	exclusion
ENSG00000005187	ACSM3	43	16:20808315-20808475	+	TE	0.011299	0.014628	-0.0033296	0.588	K3	0.4505	FALSE	exclusion
ENSG00000005187	ACSM3	44	16:20808476-20808478	+	TE	0.019153	0.022544	-0.0033906	0.575	K3	0.4505	FALSE	exclusion
ENSG00000005187	ACSM3	45	16:20808479-20808903	+	TE	0.04754	0.034	0.01354	0.635	K3	0.4505	FALSE	inclusion
ENSG00000005189	REXO5	4	16:20817818-20817820	+	TS	0.04908	0.076867	-0.027787	0.565	K4	1	FALSE	exclusion
ENSG00000005189	REXO5	5	16:20817821-20817842	+	TS	0.048561	0.076452	-0.027891	0.623	K4	1	FALSE	exclusion
ENSG00000005189	REXO5	6	16:20817843-20817848	+	TS	0.045606	0.077776	-0.032171	0.636	K4	1	FALSE	exclusion
ENSG00000005189	REXO5	7	16:20817849-20817873	+	TS	0.047157	0.20766	-0.1605	0.649	K4	1	FALSE	exclusion
ENSG00000005189	REXO5	8	16:20817874-20817938	+	TS	0.91987	0.79444	0.12543	0.618	K4	1	FALSE	inclusion
ENSG00000005189	REXO5	9	16:20817939-20817945	+	TS	0.047132	0.073701	-0.026569	0.568	K4	1	FALSE	exclusion
ENSG00000005189	REXO5	10	16:20817946-20817978	+	TS	0.046207	0.074543	-0.028336	0.594	K4	1	FALSE	exclusion
ENSG00000005189	REXO5	11	16:20817979-20817984	+	TS	0.047129	0.075154	-0.028025	0.619	K4	1	FALSE	exclusion
ENSG00000005189	REXO5	12	16:20817985-20818019	+	TS	0.046332	0.076318	-0.029986	0.613	K4	1	FALSE	exclusion
ENSG00000005189	REXO5	13	16:20818020-20818027	+	TS	0.078496	0.078301	0.00019516	0.562	K4	1	FALSE	inclusion
ENSG00000005436	GCFC2	32	2:75891771-75891909	-	TE	0.23899	0.34145	-0.10246	0.678	K1	0.9747	FALSE	exclusion
ENSG00000005436	GCFC2	33	2:75891760-75891770	-	TE	0.76332	0.66218	0.10114	0.672	K1	0.9747	FALSE	inclusion
ENSG00000005436	GCFC2	35	2:75891545-75891687	-	TE	0.0033385	0.0046638	-0.0013253	0.582	K2	0.9952	FALSE	exclusion
ENSG00000005436	GCFC2	36	2:75891544-75891544	-	TE	0.59844	0.67805	-0.079605	0.63	K2	0.9952	FALSE	exclusion
ENSG00000005436	GCFC2	37	2:75889832-75891543	-	TE	0.40106	0.32142	0.079637	0.652	K2	0.9952	FALSE	inclusion
ENSG00000005448	WDR54	28	2:74652202-74652223	+	AA	0.91457	0.88159	0.032974	0.606	K0	0	FALSE	inclusion
ENSG00000005448	WDR54	29	2:74652224-74652364	+	CE	0.91645	0.90104	0.015414	0.509	K0	0	FALSE	inclusion
ENSG00000005483	KMT2E	57	7:104752272-104752797	+	CE	0.93383	0.91321	0.020625	0.565	K0	0	FALSE	inclusion
ENSG00000005483	KMT2E	58	7:104752798-104752916	+	RI	0.93973	0.91675	0.022977	0.577	K0	0	FALSE	inclusion
ENSG00000005483	KMT2E	59	7:104752917-104752927	+	TE	0.011058	0.012415	-0.001356	0.52	K2	1.3739	FALSE	exclusion
ENSG00000005483	KMT2E	60	7:104752928-104754531	+	TE	0.16177	0.15365	0.0081174	0.513	K2	1.3739	FALSE	inclusion
ENSG00000005483	KMT2E	61	7:104754532-104754532	+	TE	0.07629	0.070378	0.0059116	0.57	K2	1.3739	FALSE	inclusion
ENSG00000005483	KMT2E	62	7:104754533-104754808	+	TE	0.77353	0.78916	-0.015635	0.519	K2	1.3739	FALSE	exclusion
ENSG00000005812	FBXL3	13	13:77581700-77581923	-	TE	0.27429	0.30146	-0.027167	0.615	K1	0.8987	FALSE	exclusion
ENSG00000005812	FBXL3	14	13:77579389-77581699	-	TE	0.72677	0.70079	0.025984	0.639	K1	0.8987	FALSE	inclusion
ENSG00000005882	PDK2	39	17:48187321-48187348	+	TE	0.041897	0.065202	-0.023305	0.6	K2	0	FALSE	exclusion
ENSG00000005882	PDK2	40	17:48187349-48187573	+	TE	0.042035	0.064702	-0.022667	0.553	K2	0	FALSE	exclusion
ENSG00000005882	PDK2	41	17:48187574-48188422	+	TE	0.041349	0.065871	-0.024522	0.578	K2	0	FALSE	exclusion
ENSG00000005882	PDK2	42	17:48188423-48189516	+	TE	0.95656	0.93578	0.020776	0.575	K2	0	FALSE	inclusion
ENSG00000005884	ITGA3	3	17:48133432-48133473	+	TS	0.098696	0.13737	-0.038671	0.529	K1	0.9027	FALSE	exclusion
ENSG00000005884	ITGA3	4	17:48133474-48133801	+	TS	0.9044	0.85996	0.044436	0.565	K1	0.9027	FALSE	inclusion
ENSG00000006194	ZNF263	25	16:3349106-3349156	+	CE	0.89474	0.89544	-0.00070616	0.503	K0	0	FALSE	exclusion
ENSG00000006194	ZNF263	26	16:3349157-3350912	+	RI	0.97496	0.97326	0.0016981	0.573	K0	0	FALSE	inclusion
ENSG00000006194	ZNF263	27	16:3350913-3351400	+	TE	0.97135	0.96986	0.0014922	0.505	K1	0.1166	FALSE	inclusion
ENSG00000006194	ZNF263	28	16:3351401-3351401	+	TE	0.028003	0.030064	-0.0020611	0.518	K1	0.1166	FALSE	exclusion
ENSG00000006432	MAP3K9	1	14:71276224-71276251	-	TS	0.76605	0.57932	0.18673	0.729	K2	0.9927	FALSE	inclusion
ENSG00000006432	MAP3K9	2	14:71275889-71276223	-	TS	0.19723	0.21268	-0.015452	0.513	K2	0.9927	FALSE	exclusion
ENSG00000006432	MAP3K9	3	14:71275483-71275888	-	TS	0.13434	0.32194	-0.18759	0.74	K2	0.9927	FALSE	exclusion
ENSG00000006530	AGK	33	7:141352587-141352865	+	TE	0.020798	0.020083	0.00071537	0.525	K2	0.9919	FALSE	inclusion
ENSG00000006530	AGK	34	7:141352866-141352947	+	TE	0.19724	0.23624	-0.038996	0.606	K2	0.9919	FALSE	exclusion
ENSG00000006530	AGK	35	7:141352948-141355044	+	TE	0.80327	0.76633	0.036938	0.59	K2	0.9919	FALSE	inclusion
ENSG00000006534	ALDH3B1	33	11:67795519-67795577	+	TE	0.074375	0.075878	-0.0015024	0.504	K3	1.4084	FALSE	exclusion
ENSG00000006534	ALDH3B1	34	11:67795578-67795607	+	TE	0.072408	0.079597	-0.0071886	0.526	K3	1.4084	FALSE	exclusion
ENSG00000006534	ALDH3B1	35	11:67795608-67795624	+	TE	0.073349	0.43168	-0.35834	0.645	K3	1.4084	FALSE	exclusion
ENSG00000006534	ALDH3B1	36	11:67795625-67796161	+	TE	0.22384	0.078142	0.1457	0.852	K3	1.4084	FALSE	inclusion
ENSG00000006534	ALDH3B1	37	11:67796162-67796163	+	TE	0.073514	0.077934	-0.0044197	0.51	K3	1.4084	FALSE	exclusion
ENSG00000006534	ALDH3B1	38	11:67796164-67796741	+	TE	0.42598	0.5286	-0.10262	0.579	K3	1.4084	FALSE	exclusion
ENSG00000006534	ALDH3B1	39	11:67796742-67796743	+	TE	0.3485	0.10987	0.23863	0.837	K3	1.4084	FALSE	inclusion
ENSG00000006534	ALDH3B1	40	11:67796744-67796744	+	TE	0.14824	0.086277	0.061967	0.685	K3	1.4084	FALSE	inclusion
ENSG00000006607	FARP2	74	2:242433557-242433891	+	RI	0.94314	0.883	0.060137	0.717	K0	0	FALSE	inclusion
ENSG00000006607	FARP2	75	2:242433892-242434255	+	TE	0.95285	0.93046	0.022389	0.571	K1	0.0202	FALSE	inclusion
ENSG00000006607	FARP2	76	2:242434256-242434256	+	TE	0.04623	0.070787	-0.024557	0.602	K1	0.0202	FALSE	exclusion
ENSG00000006634	DBF4	1	7:87505531-87505543	+	TS	0.2937	0.080273	0.21343	0.847	K3	0.9792	FALSE	inclusion
ENSG00000006634	DBF4	2	7:87505544-87505801	+	TS	0.11713	0.27379	-0.15666	0.852	K3	0.9792	FALSE	exclusion
ENSG00000006634	DBF4	3	7:87505802-87505848	+	TS	0.11645	0.084972	0.031476	0.562	K3	0.9792	FALSE	inclusion
ENSG00000006634	DBF4	4	7:87505849-87505897	+	TS	0.21079	0.079596	0.1312	0.752	K3	0.9792	FALSE	inclusion
ENSG00000006634	DBF4	5	7:87505898-87505914	+	TS	0.11483	0.076993	0.037835	0.602	K3	0.9792	FALSE	inclusion
ENSG00000006634	DBF4	6	7:87505915-87506093	+	TS	0.61704	0.72369	-0.10665	0.702	K3	0.9792	FALSE	exclusion
ENSG00000006712	PAF1	8	19:39880709-39880801	-	CE	0.87684	0.85803	0.018803	0.516	K0	0	FALSE	inclusion
ENSG00000006712	PAF1	29	19:39876555-39876859	-	TE	0.098205	0.10163	-0.0034251	0.513	K2	0.0216	FALSE	exclusion
ENSG00000006712	PAF1	30	19:39876493-39876554	-	TE	0.89729	0.89851	-0.0012201	0.519	K2	0.0216	FALSE	exclusion
ENSG00000006712	PAF1	31	19:39876492-39876492	-	TE	0.10209	0.10486	-0.0027744	0.501	K2	0.0216	FALSE	exclusion
ENSG00000006740	ARHGAP44	36	17:12893349-12893901	+	TE	0.047317	0.097052	-0.049735	0.527	K2	1.4567	FALSE	exclusion
ENSG00000006740	ARHGAP44	37	17:12893902-12894959	+	TE	0.70294	0.6705	0.032437	0.574	K2	1.4567	FALSE	inclusion
ENSG00000006740	ARHGAP44	38	17:12894960-12894960	+	TE	0.28779	0.26991	0.017882	0.579	K2	1.4567	FALSE	inclusion
ENSG00000007168	PAFAH1B1	42	17:2587208-2587794	+	TE	0.12928	0.12337	0.005915	0.527	K1	0	FALSE	inclusion
ENSG00000007168	PAFAH1B1	43	17:2587795-2588909	+	TE	0.87467	0.88228	-0.0076147	0.508	K1	0	FALSE	exclusion
ENSG00000007341	ST7L	2	1:113162406-113162418	-	TS	0.0867	0.080199	0.0065001	0.569	K3	1.3201	FALSE	inclusion
ENSG00000007341	ST7L	3	1:113162397-113162405	-	TS	0.74909	0.76166	-0.012572	0.521	K3	1.3201	FALSE	exclusion
ENSG00000007341	ST7L	4	1:113162295-113162396	-	TS	0.17473	0.15439	0.020343	0.541	K3	1.3201	FALSE	inclusion
ENSG00000007341	ST7L	5	1:113162287-113162294	-	TS	0.12395	0.10166	0.022293	0.501	K3	1.3201	FALSE	inclusion
ENSG00000007341	ST7L	6	1:113162266-113162286	-	TS	0.11879	0.13144	-0.012649	0.557	K3	1.3201	FALSE	exclusion
ENSG00000007341	ST7L	65	1:113068608-113068733	-	TE	0.039876	0.064494	-0.024618	0.649	K3	1.4762	FALSE	exclusion
ENSG00000007341	ST7L	66	1:113068505-113068607	-	TE	0.039199	0.22526	-0.18606	0.659	K3	1.4762	FALSE	exclusion
ENSG00000007341	ST7L	67	1:113068501-113068504	-	TE	0.039925	0.065713	-0.025788	0.637	K3	1.4762	FALSE	exclusion
ENSG00000007341	ST7L	68	1:113068498-113068500	-	TE	0.20424	0.17483	0.029416	0.561	K3	1.4762	FALSE	inclusion
ENSG00000007341	ST7L	69	1:113068381-113068497	-	TE	0.060043	0.09703	-0.036987	0.611	K3	1.4762	FALSE	exclusion
ENSG00000007341	ST7L	70	1:113068152-113068380	-	TE	0.042262	0.076494	-0.034231	0.653	K3	1.4762	FALSE	exclusion
ENSG00000007341	ST7L	71	1:113067904-113068151	-	TE	0.040512	0.063978	-0.023466	0.672	K3	1.4762	FALSE	exclusion
ENSG00000007341	ST7L	72	1:113066140-113067903	-	TE	0.77275	0.6214	0.15135	0.606	K3	1.4762	FALSE	inclusion
ENSG00000007372	PAX6	68	11:31811484-31811567	-	TE	0.0075412	0.013789	-0.0062478	0.639	K4	0	FALSE	exclusion
ENSG00000007372	PAX6	69	11:31811470-31811483	-	TE	0.0074648	0.013868	-0.0064029	0.661	K4	0	FALSE	exclusion
ENSG00000007372	PAX6	70	11:31811466-31811469	-	TE	0.0072227	0.013972	-0.006749	0.67	K4	0	FALSE	exclusion
ENSG00000007372	PAX6	71	11:31811465-31811465	-	TE	0.0076163	0.01386	-0.0062436	0.631	K4	0	FALSE	exclusion
ENSG00000007372	PAX6	72	11:31811461-31811464	-	TE	0.0075387	0.013532	-0.0059931	0.606	K4	0	FALSE	exclusion
ENSG00000007372	PAX6	73	11:31811378-31811460	-	TE	0.0074336	0.014387	-0.0069538	0.641	K4	0	FALSE	exclusion
ENSG00000007372	PAX6	74	11:31810730-31811377	-	TE	0.0075275	0.014094	-0.0065663	0.647	K4	0	FALSE	exclusion
ENSG00000007372	PAX6	75	11:31810460-31810729	-	TE	0.007372	0.013673	-0.0063008	0.639	K4	0	FALSE	exclusion
ENSG00000007372	PAX6	76	11:31810458-31810459	-	TE	0.0076427	0.013779	-0.0061366	0.614	K4	0	FALSE	exclusion
ENSG00000007372	PAX6	77	11:31806340-31810457	-	TE	0.99251	0.98601	0.0065029	0.616	K4	0	FALSE	inclusion
ENSG00000007384	RHBDF1	46	16:108136-108758	-	TE	0.097832	0.35309	-0.25526	0.607	K2	0.0051	FALSE	exclusion
ENSG00000007384	RHBDF1	47	16:108061-108135	-	TE	0.90002	0.6408	0.25922	0.591	K2	0.0051	FALSE	inclusion
ENSG00000007384	RHBDF1	48	16:108058-108060	-	TE	0.10114	0.10531	-0.0041646	0.505	K2	0.0051	FALSE	exclusion
ENSG00000007402	CACNA2D2	50	3:50402097-50402237	-	TE	0.085365	0.058492	0.026873	0.631	K2	0	FALSE	inclusion
ENSG00000007402	CACNA2D2	51	3:50400323-50402096	-	TE	0.91125	0.94062	-0.029365	0.625	K2	0	FALSE	exclusion
ENSG00000007402	CACNA2D2	52	3:50400286-50400322	-	TE	0.086252	0.060043	0.026209	0.628	K2	0	FALSE	inclusion
ENSG00000007402	CACNA2D2	53	3:50400233-50400285	-	TE	0.087247	0.059716	0.027531	0.615	K2	0	FALSE	inclusion
ENSG00000007516	BAIAP3	61	16:1398380-1398641	+	TE	0.061078	0.10743	-0.046348	0.676	K2	0.0612	FALSE	exclusion
ENSG00000007516	BAIAP3	62	16:1398642-1398756	+	TE	0.059326	0.1065	-0.047173	0.639	K2	0.0612	FALSE	exclusion
ENSG00000007516	BAIAP3	63	16:1398757-1398794	+	TE	0.05725	0.50996	-0.45271	0.762	K2	0.0612	FALSE	exclusion
ENSG00000007516	BAIAP3	64	16:1398795-1398795	+	TE	0.94033	0.48865	0.45168	0.774	K2	0.0612	FALSE	inclusion
ENSG00000007923	DNAJC11	37	1:6695551-6695760	-	TE	0.057466	0.063553	-0.0060876	0.551	K2	0.9542	FALSE	exclusion
ENSG00000007923	DNAJC11	38	1:6695446-6695550	-	TE	0.10877	0.19826	-0.089487	0.512	K2	0.9542	FALSE	exclusion
ENSG00000007923	DNAJC11	39	1:6695173-6695445	-	TE	0.8951	0.80075	0.094344	0.508	K2	0.9542	FALSE	inclusion
ENSG00000007952	NOX1	23	X:100098322-100098436	-	TE	0.12013	0.08703	0.033095	0.601	K1	0	FALSE	inclusion
ENSG00000007952	NOX1	24	X:100098313-100098321	-	TE	0.87583	0.91434	-0.03851	0.615	K1	0	FALSE	exclusion
ENSG00000008083	JARID2	24	6:15520300-15520597	+	TE	0.075776	0.23872	-0.16294	0.7	K1	0.9661	FALSE	exclusion
ENSG00000008083	JARID2	25	6:15520598-15522252	+	TE	0.9236	0.76058	0.16302	0.67	K1	0.9661	FALSE	inclusion
ENSG00000008226	DLEC1	42	3:38158699-38158793	+	CE	0.93437	0.87043	0.063942	0.673	K0	0	FALSE	inclusion
ENSG00000008226	DLEC1	49	3:38163780-38164229	+	TE	0.0050475	0.0067536	-0.0017061	0.61	K2	0.5814	FALSE	exclusion
ENSG00000008226	DLEC1	50	3:38164230-38165040	+	TE	0.88177	0.89892	-0.017144	0.669	K2	0.5814	FALSE	exclusion
ENSG00000008226	DLEC1	51	3:38165041-38165516	+	TE	0.1186	0.10137	0.017227	0.645	K2	0.5814	FALSE	inclusion
ENSG00000008256	CYTH3	28	7:6204500-6204647	-	TE	0.098962	0.086423	0.012539	0.563	K2	0	FALSE	inclusion
ENSG00000008256	CYTH3	29	7:6204371-6204499	-	TE	0.096386	0.086113	0.010273	0.574	K2	0	FALSE	inclusion
ENSG00000008256	CYTH3	30	7:6201407-6204370	-	TE	0.90256	0.91288	-0.01032	0.532	K2	0	FALSE	exclusion
ENSG00000008277	ADAM22	52	7:87825786-87825806	+	TE	0.041505	0.054839	-0.013334	0.568	K3	0.0354	FALSE	exclusion
ENSG00000008277	ADAM22	53	7:87825807-87825897	+	TE	0.041273	0.1999	-0.15863	0.603	K3	0.0354	FALSE	exclusion
ENSG00000008277	ADAM22	54	7:87825898-87826072	+	TE	0.041474	0.053699	-0.012224	0.555	K3	0.0354	FALSE	exclusion
ENSG00000008277	ADAM22	55	7:87826073-87826447	+	TE	0.042548	0.053949	-0.011401	0.594	K3	0.0354	FALSE	exclusion
ENSG00000008277	ADAM22	56	7:87826448-87832204	+	TE	0.95756	0.79895	0.15861	0.59	K3	0.0354	FALSE	inclusion
ENSG00000008283	CYB561	35	17:61511839-61511955	-	TE	0.12987	0.086214	0.043659	0.589	K4	2.2078	FALSE	inclusion
ENSG00000008283	CYB561	36	17:61511764-61511838	-	TE	0.12542	0.086141	0.03928	0.612	K4	2.2078	FALSE	inclusion
ENSG00000008283	CYB561	37	17:61511692-61511763	-	TE	0.12695	0.083568	0.043382	0.636	K4	2.2078	FALSE	inclusion
ENSG00000008283	CYB561	38	17:61511675-61511691	-	TE	0.12527	0.15273	-0.027457	0.613	K4	2.2078	FALSE	exclusion
ENSG00000008283	CYB561	39	17:61511622-61511674	-	TE	0.12595	0.13735	-0.011404	0.576	K4	2.2078	FALSE	exclusion
ENSG00000008283	CYB561	40	17:61511553-61511621	-	TE	0.12413	0.085852	0.038279	0.6	K4	2.2078	FALSE	inclusion
ENSG00000008283	CYB561	41	17:61511501-61511552	-	TE	0.52102	0.44786	0.073169	0.577	K4	2.2078	FALSE	inclusion
ENSG00000008283	CYB561	43	17:61511270-61511324	-	TE	0.11914	0.23116	-0.11202	0.714	K4	2.2078	FALSE	exclusion
ENSG00000008283	CYB561	44	17:61510925-61511269	-	TE	0.24877	0.29264	-0.043868	0.6	K4	2.2078	FALSE	exclusion
ENSG00000008283	CYB561	46	17:61510577-61510776	-	TE	0.10684	0.082898	0.023944	0.59	K3	1.1475	FALSE	inclusion
ENSG00000008283	CYB561	49	17:61509666-61509667	-	TE	0.14028	0.10177	0.038514	0.59	K3	1.1475	FALSE	inclusion
ENSG00000008283	CYB561	50	17:61509665-61509665	-	TE	0.11982	0.08721	0.032607	0.591	K3	1.1475	FALSE	inclusion
ENSG00000008300	CELSR3	43	3:48674032-48675665	-	TE	0.063643	0.18684	-0.1232	0.513	K1	0.9304	FALSE	exclusion
ENSG00000008300	CELSR3	44	3:48673902-48674031	-	TE	0.93402	0.81351	0.12051	0.527	K1	0.9304	FALSE	inclusion
ENSG00000008323	PLEKHG6	31	12:6437302-6437651	+	TE	0.050388	0.021853	0.028535	0.693	K2	0.3946	FALSE	inclusion
ENSG00000008323	PLEKHG6	32	12:6437652-6437671	+	TE	0.94861	0.97567	-0.027063	0.675	K2	0.3946	FALSE	exclusion
ENSG00000008323	PLEKHG6	33	12:6437672-6437672	+	TE	0.029106	0.023951	0.0051557	0.558	K2	0.3946	FALSE	inclusion
ENSG00000008382	MPND	19	19:4357948-4358079	+	AA	0.91341	0.89455	0.018864	0.573	K0	0	FALSE	inclusion
ENSG00000008382	MPND	20	19:4358080-4358169	+	CE	0.91206	0.88958	0.022477	0.528	K0	0	FALSE	inclusion
ENSG00000008405	CRY1	1	12:107487292-107487607	-	TS	0.13509	0.12287	0.012218	0.528	K1	0	FALSE	inclusion
ENSG00000008405	CRY1	2	12:107486582-107487291	-	TS	0.86549	0.87683	-0.011339	0.509	K1	0	FALSE	exclusion
ENSG00000008516	MMP25	8	16:3107034-3107210	+	CE	0.88138	0.91549	-0.034108	0.588	K0	0	FALSE	exclusion
ENSG00000008710	PKD1	143	16:2139528-2140195	-	TE	0.10539	0.06677	0.038618	0.617	K1	0.5678	FALSE	inclusion
ENSG00000008710	PKD1	144	16:2138711-2139527	-	TE	0.89244	0.93027	-0.037826	0.63	K1	0.5678	FALSE	exclusion
ENSG00000008853	RHOBTB2	24	8:22874765-22875954	+	TE	0.34638	0.36503	-0.018656	0.547	K2	1.0591	FALSE	exclusion
ENSG00000008853	RHOBTB2	25	8:22875955-22877705	+	TE	0.23717	0.24436	-0.0071913	0.513	K2	1.0591	FALSE	exclusion
ENSG00000008853	RHOBTB2	26	8:22877706-22877712	+	TE	0.42755	0.40052	0.027026	0.514	K2	1.0591	FALSE	inclusion
ENSG00000009307	CSDE1	44	1:115261234-115261366	-	CE	0.90384	0.90696	-0.0031197	0.522	K0	0	FALSE	exclusion
ENSG00000009413	REV3L	54	6:111620278-111621359	-	TE	0.65869	0.77335	-0.11466	0.635	K1	0.9104	FALSE	exclusion
ENSG00000009413	REV3L	55	6:111620234-111620277	-	TE	0.34371	0.22559	0.11812	0.628	K1	0.9104	FALSE	inclusion
ENSG00000009790	TRAF3IP3	42	1:209952720-209952775	+	RI	0.89605	0.87294	0.023109	0.566	K0	0	FALSE	inclusion
ENSG00000009790	TRAF3IP3	47	1:209953815-209953951	+	CE	0.88885	0.90739	-0.018536	0.545	K0	0	FALSE	exclusion
ENSG00000009790	TRAF3IP3	52	1:209955426-209955528	+	TE	0.059391	0.054798	0.0045926	0.569	K3	0	FALSE	inclusion
ENSG00000009790	TRAF3IP3	53	1:209955529-209955652	+	TE	0.63372	0.054174	0.57955	0.802	K3	0	FALSE	inclusion
ENSG00000009790	TRAF3IP3	54	1:209955653-209955658	+	TE	0.058742	0.055347	0.0033943	0.534	K3	0	FALSE	inclusion
ENSG00000009790	TRAF3IP3	55	1:209955659-209955660	+	TE	0.057978	0.054975	0.0030027	0.55	K3	0	FALSE	inclusion
ENSG00000009790	TRAF3IP3	56	1:209955661-209955664	+	TE	0.058356	0.054155	0.0042015	0.532	K3	0	FALSE	inclusion
ENSG00000009790	TRAF3IP3	57	1:209955665-209955665	+	TE	0.056401	0.055389	0.0010121	0.548	K3	0	FALSE	inclusion
ENSG00000009790	TRAF3IP3	58	1:209955666-209955668	+	TE	0.36721	0.94586	-0.57865	0.794	K3	0	FALSE	exclusion
ENSG00000009830	POMT2	3	14:77786777-77787047	-	TS	0.2719	0.11225	0.15965	0.739	K2	0.9953	FALSE	inclusion
ENSG00000010017	RANBP9	14	6:13632602-13632753	-	CE	0.90683	0.94918	-0.04235	0.647	K0	0	FALSE	exclusion
ENSG00000010017	RANBP9	16	6:13622594-13622724	-	TE	0.022112	0.026986	-0.0048736	0.554	K2	0.5139	FALSE	exclusion
ENSG00000010017	RANBP9	17	6:13622565-13622593	-	TE	0.022142	0.044928	-0.022787	0.662	K2	0.5139	FALSE	exclusion
ENSG00000010017	RANBP9	18	6:13621730-13622564	-	TE	0.97756	0.95595	0.021604	0.597	K2	0.5139	FALSE	inclusion
ENSG00000010072	SPRTN	1	1:231472850-231473793	+	TS	0.0046287	0.0055336	-0.00090487	0.547	K2	0	FALSE	exclusion
ENSG00000010072	SPRTN	2	1:231473794-231474001	+	TS	0.0048469	0.0055615	-0.00071465	0.556	K2	0	FALSE	exclusion
ENSG00000010072	SPRTN	3	1:231474002-231474040	+	TS	0.0046613	0.005442	-0.00078076	0.52	K2	0	FALSE	exclusion
ENSG00000010072	SPRTN	4	1:231474041-231474350	+	TS	0.99537	0.99463	0.00074661	0.522	K2	0	FALSE	inclusion
ENSG00000010072	SPRTN	14	1:231488356-231488500	+	TE	0.34942	0.089905	0.25952	0.584	K2	0.268	FALSE	inclusion
ENSG00000010072	SPRTN	15	1:231488501-231488510	+	TE	0.078219	0.09158	-0.013361	0.557	K2	0.268	FALSE	exclusion
ENSG00000010072	SPRTN	16	1:231488511-231488878	+	TE	0.077902	0.088894	-0.010992	0.502	K2	0.268	FALSE	exclusion
ENSG00000010072	SPRTN	17	1:231488879-231490769	+	TE	0.65246	0.90882	-0.25636	0.557	K2	0.268	FALSE	exclusion
ENSG00000010292	NCAPD2	5	12:6602670-6602713	+	AD	0.98334	0.97932	0.00402	0.537	K0	0	FALSE	inclusion
ENSG00000010292	NCAPD2	6	12:6602714-6603241	+	AD	0.98157	0.97754	0.0040295	0.518	K0	0	FALSE	inclusion
ENSG00000010295	IFFO1	18	12:6648773-6649754	-	TE	0.50106	0.2669	0.23416	0.657	K2	0	FALSE	inclusion
ENSG00000010295	IFFO1	19	12:6648743-6648772	-	TE	0.060834	0.30736	-0.24652	0.541	K2	0	FALSE	exclusion
ENSG00000010295	IFFO1	20	12:6648705-6648742	-	TE	0.061724	0.0865	-0.024776	0.54	K2	0	FALSE	exclusion
ENSG00000010295	IFFO1	21	12:6648694-6648704	-	TE	0.49818	0.51321	-0.015034	0.531	K2	0	FALSE	exclusion
ENSG00000010310	GIPR	28	19:46184987-46185246	+	TE	0.1087	0.11389	-0.0051944	0.502	K2	1.4248	FALSE	exclusion
ENSG00000010310	GIPR	29	19:46185247-46185251	+	TE	0.14487	0.12046	0.024412	0.575	K2	1.4248	FALSE	inclusion
ENSG00000010310	GIPR	30	19:46185252-46185413	+	TE	0.24312	0.11792	0.1252	0.667	K2	1.4248	FALSE	inclusion
ENSG00000010310	GIPR	31	19:46185414-46186982	+	TE	0.72032	0.88483	-0.16451	0.658	K2	1.4248	FALSE	exclusion
ENSG00000010327	STAB1	96	3:52558316-52558509	+	TE	0.02346	0.049331	-0.025871	0.664	K1	0	FALSE	exclusion
ENSG00000010327	STAB1	97	3:52558510-52558511	+	TE	0.97626	0.9522	0.024058	0.654	K1	0	FALSE	inclusion
ENSG00000010361	FUZ	51	19:50310338-50310396	-	TE	0.067568	0.080942	-0.013374	0.566	K3	0.9664	FALSE	exclusion
ENSG00000010361	FUZ	52	19:50310177-50310337	-	TE	0.069464	0.082812	-0.013348	0.582	K3	0.9664	FALSE	exclusion
ENSG00000010361	FUZ	53	19:50310154-50310176	-	TE	0.46054	0.6957	-0.23516	0.654	K3	0.9664	FALSE	exclusion
ENSG00000010361	FUZ	54	19:50310150-50310153	-	TE	0.07118	0.08174	-0.01056	0.543	K3	0.9664	FALSE	exclusion
ENSG00000010361	FUZ	55	19:50310147-50310149	-	TE	0.070626	0.30106	-0.23043	0.544	K3	0.9664	FALSE	exclusion
ENSG00000010361	FUZ	56	19:50310142-50310146	-	TE	0.35482	0.083441	0.27138	0.848	K3	0.9664	FALSE	inclusion
ENSG00000010361	FUZ	57	19:50310126-50310141	-	TE	0.25232	0.081576	0.17074	0.81	K3	0.9664	FALSE	inclusion
ENSG00000010404	IDS	32	X:148564074-148564749	-	TE	0.11369	0.12115	-0.0074602	0.524	K2	0.6414	FALSE	exclusion
ENSG00000010404	IDS	33	X:148563758-148564073	-	TE	0.10878	0.33197	-0.22318	0.644	K2	0.6414	FALSE	exclusion
ENSG00000010404	IDS	34	X:148558521-148563757	-	TE	0.89626	0.66502	0.23124	0.674	K2	0.6414	FALSE	inclusion
ENSG00000010610	CD4	23	12:6923630-6923924	+	RI	0.8739	0.87276	0.0011402	0.534	K0	0	FALSE	inclusion
ENSG00000010610	CD4	35	12:6928465-6928997	+	TE	0.013745	0.033191	-0.019446	0.67	K1	0.4431	FALSE	exclusion
ENSG00000010610	CD4	36	12:6928998-6929974	+	TE	0.98625	0.96711	0.01914	0.678	K1	0.4431	FALSE	inclusion
ENSG00000010803	SCMH1	32	1:41493829-41493991	-	CE	0.92898	0.91535	0.013625	0.53	K0	0	FALSE	inclusion
ENSG00000010803	SCMH1	33	1:41493148-41493828	-	RI	0.95748	0.94274	0.014736	0.535	K0	0	FALSE	inclusion
ENSG00000010803	SCMH1	34	1:41492876-41493147	-	TE	0.64063	0.75567	-0.11504	0.576	K2	0	FALSE	exclusion
ENSG00000010803	SCMH1	35	1:41492874-41492875	-	TE	0.087997	0.096994	-0.0089961	0.502	K2	0	FALSE	exclusion
ENSG00000010803	SCMH1	36	1:41492872-41492873	-	TE	0.36022	0.24525	0.11497	0.602	K2	0	FALSE	inclusion
ENSG00000011007	ELOA	14	1:24086002-24086383	+	TE	0.010461	0.0098596	0.00060162	0.531	K1	0	FALSE	inclusion
ENSG00000011007	ELOA	15	1:24086384-24088549	+	TE	0.98984	0.9899	-5.7827e-05	0.521	K1	0	FALSE	exclusion
ENSG00000011009	LYPLA2	19	1:24120816-24120916	+	RI	0.8805	0.89295	-0.012444	0.549	K0	0	FALSE	exclusion
ENSG00000011009	LYPLA2	22	1:24121042-24121090	+	CE	0.897	0.8971	-9.4978e-05	0.542	K0	0	FALSE	exclusion
ENSG00000011009	LYPLA2	23	1:24121091-24121171	+	RI	0.87324	0.90423	-0.030997	0.599	K0	0	FALSE	exclusion
ENSG00000011009	LYPLA2	24	1:24121172-24121202	+	TE	0.042703	0.069893	-0.02719	0.566	K4	0.5122	FALSE	exclusion
ENSG00000011009	LYPLA2	25	1:24121203-24121235	+	TE	0.90937	0.63949	0.26987	0.565	K4	0.5122	FALSE	inclusion
ENSG00000011009	LYPLA2	26	1:24121236-24121360	+	TE	0.044452	0.074235	-0.029784	0.596	K4	0.5122	FALSE	exclusion
ENSG00000011009	LYPLA2	27	1:24121361-24121365	+	TE	0.056809	0.076426	-0.019618	0.571	K4	0.5122	FALSE	exclusion
ENSG00000011009	LYPLA2	28	1:24121366-24121445	+	TE	0.055731	0.072268	-0.016537	0.505	K4	0.5122	FALSE	exclusion
ENSG00000011009	LYPLA2	29	1:24121446-24121571	+	TE	0.046653	0.070728	-0.024075	0.592	K4	0.5122	FALSE	exclusion
ENSG00000011009	LYPLA2	30	1:24121572-24121767	+	TE	0.046889	0.071688	-0.024799	0.591	K4	0.5122	FALSE	exclusion
ENSG00000011009	LYPLA2	31	1:24121768-24122027	+	TE	0.063618	0.34475	-0.28113	0.533	K4	0.5122	FALSE	exclusion
ENSG00000011009	LYPLA2	32	1:24122028-24122029	+	TE	0.044487	0.079705	-0.035218	0.618	K4	0.5122	FALSE	exclusion
ENSG00000011258	MBTD1	29	17:49254788-49258055	-	TE	0.48104	0.26192	0.21912	0.715	K1	0.8692	FALSE	inclusion
ENSG00000011258	MBTD1	30	17:49254786-49254787	-	TE	0.51755	0.73697	-0.21942	0.731	K1	0.8692	FALSE	exclusion
ENSG00000011295	TTC19	1	17:15902694-15902781	+	TS	0.11835	0.12634	-0.0079823	0.518	K3	0.9999	FALSE	exclusion
ENSG00000011295	TTC19	2	17:15902782-15903097	+	TS	0.11891	0.12615	-0.0072369	0.538	K3	0.9999	FALSE	exclusion
ENSG00000011295	TTC19	3	17:15903098-15903115	+	TS	0.11608	0.12512	-0.0090367	0.541	K3	0.9999	FALSE	exclusion
ENSG00000011295	TTC19	4	17:15903116-15903137	+	TS	0.11612	0.12673	-0.01061	0.529	K3	0.9999	FALSE	exclusion
ENSG00000011295	TTC19	5	17:15903138-15903147	+	TS	0.52214	0.39576	0.12638	0.576	K3	0.9999	FALSE	inclusion
ENSG00000011295	TTC19	6	17:15903148-15903346	+	TS	0.48004	0.59419	-0.11415	0.572	K3	0.9999	FALSE	exclusion
ENSG00000011295	TTC19	26	17:15929854-15930016	+	CE	0.92074	0.90138	0.019366	0.602	K0	0	FALSE	inclusion
ENSG00000011295	TTC19	29	17:15930688-15930849	+	TE	0.010325	0.024631	-0.014306	0.528	K2	0.4995	FALSE	exclusion
ENSG00000011295	TTC19	30	17:15930850-15932096	+	TE	0.98041	0.96629	0.01412	0.568	K2	0.4995	FALSE	inclusion
ENSG00000011295	TTC19	31	17:15932097-15932100	+	TE	0.019416	0.019715	-0.00029859	0.514	K2	0.4995	FALSE	exclusion
ENSG00000011295	TTC19	32	17:15932101-15932226	+	TE	0.010166	0.010194	-2.8135e-05	0.502	K2	0.4995	FALSE	exclusion
ENSG00000011332	DPF1	33	19:38702712-38702773	-	TE	0.08917	0.10987	-0.020702	0.549	K4	0.3233	FALSE	exclusion
ENSG00000011332	DPF1	34	19:38702705-38702711	-	TE	0.86954	0.50408	0.36546	0.715	K4	0.3233	FALSE	inclusion
ENSG00000011332	DPF1	35	19:38702614-38702704	-	TE	0.091149	0.10712	-0.01597	0.562	K4	0.3233	FALSE	exclusion
ENSG00000011332	DPF1	36	19:38702602-38702613	-	TE	0.11629	0.12287	-0.0065779	0.534	K4	0.3233	FALSE	exclusion
ENSG00000011332	DPF1	37	19:38702395-38702601	-	TE	0.092163	0.10955	-0.017386	0.53	K4	0.3233	FALSE	exclusion
ENSG00000011332	DPF1	38	19:38702357-38702394	-	TE	0.094483	0.10964	-0.015153	0.534	K4	0.3233	FALSE	exclusion
ENSG00000011332	DPF1	39	19:38702343-38702356	-	TE	0.092431	0.10848	-0.016047	0.548	K4	0.3233	FALSE	exclusion
ENSG00000011332	DPF1	40	19:38702342-38702342	-	TE	0.093565	0.10789	-0.014326	0.537	K4	0.3233	FALSE	exclusion
ENSG00000011332	DPF1	41	19:38702340-38702341	-	TE	0.096058	0.11107	-0.015009	0.561	K4	0.3233	FALSE	exclusion
ENSG00000011332	DPF1	42	19:38701683-38702339	-	TE	0.092073	0.47414	-0.38207	0.706	K4	0.3233	FALSE	exclusion
ENSG00000011332	DPF1	43	19:38701649-38701682	-	TE	0.094604	0.11269	-0.01809	0.533	K4	0.3233	FALSE	exclusion
ENSG00000011332	DPF1	44	19:38701646-38701648	-	TE	0.091113	0.10653	-0.01542	0.559	K4	0.3233	FALSE	exclusion
ENSG00000011405	PIK3C2A	43	11:17110867-17111467	-	TE	0.1063	0.18874	-0.08244	0.509	K1	0.9676	FALSE	exclusion
ENSG00000011405	PIK3C2A	44	11:17108119-17110866	-	TE	0.89504	0.81621	0.078827	0.525	K1	0.9676	FALSE	inclusion
ENSG00000011523	CEP68	11	2:65299704-65300017	+	RI	0.93217	0.88178	0.050392	0.647	K0	0	FALSE	inclusion
ENSG00000011523	CEP68	12	2:65300018-65300114	+	CE	0.91629	0.90872	0.0075697	0.566	K0	0	FALSE	inclusion
ENSG00000011523	CEP68	13	2:65300115-65301069	+	RI	0.91157	0.90123	0.010334	0.525	K0	0	FALSE	inclusion
ENSG00000011523	CEP68	14	2:65301070-65301283	+	CE	0.89907	0.87529	0.023783	0.555	K0	0	FALSE	inclusion
ENSG00000011523	CEP68	17	2:65301539-65301618	+	TE	0.057636	0.06225	-0.0046142	0.535	K1	0	FALSE	exclusion
ENSG00000011523	CEP68	18	2:65301619-65302385	+	TE	0.9425	0.93759	0.0049075	0.503	K1	0	FALSE	inclusion
ENSG00000011590	ZBTB32	16	19:36207380-36207399	+	TE	0.087418	0.11246	-0.025039	0.561	K1	0	FALSE	exclusion
ENSG00000011590	ZBTB32	17	19:36207400-36207940	+	TE	0.91131	0.87849	0.032825	0.599	K1	0	FALSE	inclusion
ENSG00000012061	ERCC1	5	19:45927624-45927625	-	TS	0.055449	0.10107	-0.045623	0.637	K3	0.0387	FALSE	exclusion
ENSG00000012061	ERCC1	6	19:45927197-45927623	-	TS	0.054752	0.10521	-0.050453	0.656	K3	0.0387	FALSE	exclusion
ENSG00000012061	ERCC1	7	19:45927131-45927196	-	TS	0.055482	0.36418	-0.30869	0.645	K3	0.0387	FALSE	exclusion
ENSG00000012061	ERCC1	8	19:45927098-45927130	-	TS	0.9439	0.63466	0.30925	0.654	K3	0.0387	FALSE	inclusion
ENSG00000012061	ERCC1	9	19:45927081-45927097	-	TS	0.056865	0.10845	-0.051586	0.65	K3	0.0387	FALSE	exclusion
ENSG00000012061	ERCC1	33	19:45912926-45912983	-	TE	0.0010841	0.0018666	-0.00078254	0.603	K3	0.064	FALSE	exclusion
ENSG00000012061	ERCC1	34	19:45912877-45912925	-	TE	0.0010115	0.001882	-0.00087047	0.619	K3	0.064	FALSE	exclusion
ENSG00000012061	ERCC1	35	19:45912874-45912876	-	TE	0.0010409	0.001875	-0.00083412	0.611	K3	0.064	FALSE	exclusion
ENSG00000012061	ERCC1	36	19:45912872-45912873	-	TE	0.99309	0.99198	0.0011109	0.563	K3	0.064	FALSE	inclusion
ENSG00000012061	ERCC1	37	19:45912804-45912871	-	TE	0.0025395	0.003715	-0.0011755	0.628	K3	0.064	FALSE	exclusion
ENSG00000012061	ERCC1	38	19:45910592-45912803	-	TE	0.0035992	0.0045461	-0.00094691	0.564	K3	0.064	FALSE	exclusion
ENSG00000012061	ERCC1	39	19:45910591-45910591	-	TE	0.0028296	0.0035889	-0.00075931	0.59	K3	0.064	FALSE	exclusion
ENSG00000012211	PRICKLE3	24	X:49032022-49032342	-	TE	0.0011842	0.0019712	-0.00078698	0.611	K3	0	FALSE	exclusion
ENSG00000012211	PRICKLE3	25	X:49031970-49032021	-	TE	0.0011797	0.0019995	-0.00081974	0.643	K3	0	FALSE	exclusion
ENSG00000012211	PRICKLE3	26	X:49031731-49031969	-	TE	0.0012407	0.0019403	-0.00069959	0.596	K3	0	FALSE	exclusion
ENSG00000012211	PRICKLE3	27	X:49031613-49031730	-	TE	0.001157	0.0019284	-0.00077144	0.604	K3	0	FALSE	exclusion
ENSG00000012211	PRICKLE3	28	X:49031151-49031612	-	TE	0.99882	0.99801	0.00081211	0.609	K3	0	FALSE	inclusion
ENSG00000013288	MAN2B2	26	4:6619220-6620521	+	RI	0.89722	0.89103	0.006185	0.51	K0	0	FALSE	inclusion
ENSG00000013288	MAN2B2	29	4:6621654-6621771	+	CE	0.90789	0.89978	0.0081099	0.525	K0	0	FALSE	inclusion
ENSG00000013288	MAN2B2	30	4:6621772-6622914	+	RI	0.92243	0.9022	0.02023	0.575	K0	0	FALSE	inclusion
ENSG00000013288	MAN2B2	31	4:6622915-6623081	+	TE	0.34522	0.15951	0.18571	0.805	K2	1.5619	FALSE	inclusion
ENSG00000013288	MAN2B2	32	4:6623082-6624128	+	TE	0.24896	0.34381	-0.094853	0.627	K2	1.5619	FALSE	exclusion
ENSG00000013288	MAN2B2	33	4:6624129-6625089	+	TE	0.42734	0.54076	-0.11342	0.643	K2	1.5619	FALSE	exclusion
ENSG00000013297	CLDN11	14	3:170150975-170151214	+	TE	0.11182	0.38281	-0.27099	0.757	K2	0.8837	FALSE	exclusion
ENSG00000013297	CLDN11	15	3:170151215-170151880	+	TE	0.5228	0.24688	0.27592	0.65	K2	0.8837	FALSE	inclusion
ENSG00000013297	CLDN11	16	3:170151881-170151887	+	TE	0.47508	0.49057	-0.015493	0.51	K2	0.8837	FALSE	exclusion
ENSG00000013375	PGM3	42	6:83875849-83876185	-	TE	0.17144	0.1844	-0.01296	0.584	K1	0.9956	FALSE	exclusion
ENSG00000013375	PGM3	43	6:83874592-83875848	-	TE	0.82741	0.81727	0.010141	0.601	K1	0.9956	FALSE	inclusion
ENSG00000013392	RWDD2A	6	6:83905314-83906382	+	TE	0.21485	0.11097	0.10388	0.675	K1	1	FALSE	inclusion
ENSG00000013392	RWDD2A	7	6:83906383-83908651	+	TE	0.78621	0.88912	-0.10291	0.695	K1	1	FALSE	exclusion
ENSG00000013563	DNASE1L1	26	X:153631063-153631182	-	TE	0.046614	0.061411	-0.014797	0.537	K3	0.3853	FALSE	exclusion
ENSG00000013563	DNASE1L1	27	X:153630828-153631062	-	TE	0.045955	0.061027	-0.015072	0.53	K3	0.3853	FALSE	exclusion
ENSG00000013563	DNASE1L1	28	X:153630102-153630827	-	TE	0.068976	0.059567	0.0094091	0.585	K3	0.3853	FALSE	inclusion
ENSG00000013563	DNASE1L1	29	X:153630099-153630101	-	TE	0.047959	0.062156	-0.014197	0.518	K3	0.3853	FALSE	exclusion
ENSG00000013563	DNASE1L1	30	X:153629579-153630098	-	TE	0.92998	0.93925	-0.0092676	0.561	K3	0.3853	FALSE	exclusion
ENSG00000013573	DDX11	1	12:31226779-31226793	+	TS	0.065676	0.036541	0.029135	0.695	K4	0	FALSE	inclusion
ENSG00000013573	DDX11	2	12:31226794-31226801	+	TS	0.066401	0.037937	0.028465	0.679	K4	0	FALSE	inclusion
ENSG00000013573	DDX11	3	12:31226802-31226809	+	TS	0.068448	0.036264	0.032184	0.68	K4	0	FALSE	inclusion
ENSG00000013573	DDX11	4	12:31226810-31226812	+	TS	0.068849	0.037085	0.031764	0.677	K4	0	FALSE	inclusion
ENSG00000013573	DDX11	5	12:31226813-31226815	+	TS	0.068419	0.038399	0.03002	0.669	K4	0	FALSE	inclusion
ENSG00000013573	DDX11	6	12:31226816-31226824	+	TS	0.06722	0.037652	0.029568	0.692	K4	0	FALSE	inclusion
ENSG00000013573	DDX11	7	12:31226825-31226825	+	TS	0.065628	0.037399	0.028229	0.677	K4	0	FALSE	inclusion
ENSG00000013573	DDX11	8	12:31226826-31226827	+	TS	0.0669	0.036515	0.030385	0.675	K4	0	FALSE	inclusion
ENSG00000013573	DDX11	9	12:31226828-31226831	+	TS	0.063502	0.037907	0.025595	0.66	K4	0	FALSE	inclusion
ENSG00000013573	DDX11	10	12:31226832-31226835	+	TS	0.068119	0.036907	0.031212	0.675	K4	0	FALSE	inclusion
ENSG00000013573	DDX11	11	12:31226836-31226842	+	TS	0.06731	0.03843	0.02888	0.657	K4	0	FALSE	inclusion
ENSG00000013573	DDX11	12	12:31226843-31226903	+	TS	0.93188	0.96319	-0.031305	0.677	K4	0	FALSE	exclusion
ENSG00000013573	DDX11	13	12:31226904-31227025	+	AD	0.87043	0.90219	-0.031762	0.597	K0	0	FALSE	exclusion
ENSG00000013588	GPRC5A	1	12:13043716-13044492	+	TS	0.092583	0.12029	-0.027712	0.574	K2	0	FALSE	exclusion
ENSG00000013588	GPRC5A	2	12:13044493-13044512	+	TS	0.095859	0.12115	-0.025292	0.575	K2	0	FALSE	exclusion
ENSG00000013588	GPRC5A	3	12:13044513-13044598	+	TS	0.9071	0.88028	0.026823	0.601	K2	0	FALSE	inclusion
ENSG00000013588	GPRC5A	11	12:13065381-13065443	+	TE	0.07137	0.11266	-0.041293	0.605	K2	0.9971	FALSE	exclusion
ENSG00000013588	GPRC5A	12	12:13065444-13066067	+	TE	0.068697	0.2889	-0.2202	0.815	K2	0.9971	FALSE	exclusion
ENSG00000013588	GPRC5A	13	12:13066068-13070871	+	TE	0.9325	0.71274	0.21976	0.802	K2	0.9971	FALSE	inclusion
ENSG00000014919	COX15	9	10:101476105-101476218	-	CE	0.9723	0.95761	0.014689	0.578	K0	0	FALSE	inclusion
ENSG00000014919	COX15	10	10:101474409-101474475	-	TE	0.0052541	0.0082925	-0.0030384	0.586	K1	0	FALSE	exclusion
ENSG00000014919	COX15	11	10:101473272-101474408	-	TE	0.99473	0.99183	0.0029	0.589	K1	0	FALSE	inclusion
ENSG00000015475	BID	17	22:18218318-18218357	-	TE	0.010098	0.0078956	0.0022025	0.536	K3	0.0962	FALSE	inclusion
ENSG00000015475	BID	18	22:18218265-18218317	-	TE	0.0098658	0.0079644	0.0019014	0.55	K3	0.0962	FALSE	inclusion
ENSG00000015475	BID	19	22:18217988-18218264	-	TE	0.0097786	0.0080578	0.0017208	0.521	K3	0.0962	FALSE	inclusion
ENSG00000015475	BID	20	22:18216941-18217987	-	TE	0.65807	0.65865	-0.00058343	0.495	K3	0.0962	FALSE	exclusion
ENSG00000015475	BID	21	22:18216937-18216940	-	TE	0.34136	0.3416	-0.00023942	0.522	K3	0.0962	FALSE	exclusion
ENSG00000015475	BID	22	22:18216908-18216936	-	TE	0.010381	0.008008	0.0023726	0.536	K3	0.0962	FALSE	inclusion
ENSG00000015475	BID	23	22:18216906-18216907	-	TE	0.01038	0.0081181	0.0022617	0.523	K3	0.0962	FALSE	inclusion
ENSG00000015532	XYLT2	22	17:48437330-48438512	+	AL	0.8955	0.90892	-0.013419	0.543	K0	0	FALSE	exclusion
ENSG00000015568	RGPD5	3	2:110551851-110551881	+	TS	0.080794	0.12567	-0.044873	0.65	K2	0	FALSE	exclusion
ENSG00000015568	RGPD5	4	2:110551882-110551884	+	TS	0.08385	0.12949	-0.045636	0.633	K2	0	FALSE	exclusion
ENSG00000015568	RGPD5	5	2:110551885-110551976	+	TS	0.082876	0.12385	-0.040969	0.615	K2	0	FALSE	exclusion
ENSG00000015568	RGPD5	6	2:110551977-110552114	+	TS	0.91918	0.87271	0.046467	0.634	K2	0	FALSE	inclusion
ENSG00000016864	GLT8D1	33	3:52730335-52730557	-	RI	0.87023	0.90798	-0.037742	0.578	K0	0	FALSE	exclusion
ENSG00000016864	GLT8D1	37	3:52729944-52730056	-	CE	0.97622	0.97187	0.0043413	0.531	K0	0	FALSE	inclusion
ENSG00000016864	GLT8D1	38	3:52729604-52729943	-	RI	0.98762	0.98429	0.0033304	0.501	K0	0	FALSE	inclusion
ENSG00000016864	GLT8D1	39	3:52729437-52729603	-	CE	0.98637	0.98177	0.0046065	0.579	K0	0	FALSE	inclusion
ENSG00000016864	GLT8D1	40	3:52729319-52729436	-	RI	0.98164	0.97477	0.0068711	0.569	K0	0	FALSE	inclusion
ENSG00000016864	GLT8D1	43	3:52728915-52729051	-	TE	0.32119	0.10632	0.21487	0.831	K3	0.9953	FALSE	inclusion
ENSG00000016864	GLT8D1	44	3:52728818-52728914	-	TE	0.0082033	0.011251	-0.0030482	0.536	K3	0.9953	FALSE	exclusion
ENSG00000016864	GLT8D1	45	3:52728688-52728817	-	TE	0.0084484	0.011047	-0.0025987	0.54	K3	0.9953	FALSE	exclusion
ENSG00000016864	GLT8D1	46	3:52728519-52728687	-	TE	0.0083711	0.011308	-0.0029373	0.519	K3	0.9953	FALSE	exclusion
ENSG00000016864	GLT8D1	47	3:52728508-52728518	-	TE	0.0082726	0.085002	-0.07673	0.53	K3	0.9953	FALSE	exclusion
ENSG00000016864	GLT8D1	48	3:52728505-52728507	-	TE	0.67946	0.82085	-0.14139	0.797	K3	0.9953	FALSE	exclusion
ENSG00000017260	ATP2C1	69	3:130734996-130735400	+	TE	0.74876	0.48692	0.26184	0.694	K3	1.2841	FALSE	inclusion
ENSG00000017260	ATP2C1	70	3:130735401-130735481	+	TE	0.15994	0.057336	0.10261	0.693	K3	1.2841	FALSE	inclusion
ENSG00000017260	ATP2C1	71	3:130735482-130735513	+	TE	0.043864	0.072975	-0.02911	0.593	K3	1.2841	FALSE	exclusion
ENSG00000017260	ATP2C1	72	3:130735514-130735528	+	TE	0.052781	0.067368	-0.014587	0.539	K3	1.2841	FALSE	exclusion
ENSG00000017260	ATP2C1	73	3:130735529-130735556	+	TE	0.1252	0.48698	-0.36178	0.726	K3	1.2841	FALSE	exclusion
ENSG00000017621	NA	12	X:49021045-49021127	+	CE	0.87443	0.87994	-0.0055046	0.552	K0	0	FALSE	exclusion
ENSG00000017621	NA	13	X:49021128-49021200	+	RI	0.85482	0.87545	-0.020627	0.538	K0	0	FALSE	exclusion
ENSG00000017621	NA	18	X:49022428-49022552	+	TE	0.076552	0.071077	0.0054749	0.527	K3	1.0921	FALSE	inclusion
ENSG00000017621	NA	19	X:49022553-49022553	+	TE	0.61464	0.32418	0.29046	0.757	K3	1.0921	FALSE	inclusion
ENSG00000017621	NA	20	X:49022554-49022562	+	TE	0.14344	0.10023	0.043209	0.635	K3	1.0921	FALSE	inclusion
ENSG00000017621	NA	21	X:49022563-49022971	+	TE	0.24288	0.19182	0.051062	0.526	K3	1.0921	FALSE	inclusion
ENSG00000017621	NA	22	X:49022972-49022972	+	TE	0.081888	0.075595	0.0062927	0.534	K3	1.0921	FALSE	inclusion
ENSG00000017621	NA	23	X:49022973-49024822	+	TE	0.14958	0.52194	-0.37236	0.777	K3	1.0921	FALSE	exclusion
ENSG00000017797	RALBP1	19	18:9535669-9538112	+	TE	0.74133	0.7605	-0.019168	0.515	K1	0.7455	FALSE	exclusion
ENSG00000017797	RALBP1	20	18:9538113-9538114	+	TE	0.26138	0.23905	0.022332	0.517	K1	0.7455	FALSE	inclusion
ENSG00000018610	STEEP1	6	X:118678316-118678454	-	CE	0.86623	0.90984	-0.043603	0.611	K0	0	FALSE	exclusion
ENSG00000018610	STEEP1	8	X:118676468-118676557	-	CE	0.89036	0.89578	-0.0054189	0.533	K0	0	FALSE	exclusion
ENSG00000019102	VSIG2	7	11:124618286-124618430	-	CE	0.86696	0.86913	-0.0021671	0.511	K0	0	FALSE	exclusion
ENSG00000019582	CD74	22	5:149781814-149782125	-	RI	0.90245	0.90233	0.00011603	0.512	K0	0	FALSE	inclusion
ENSG00000019582	CD74	28	5:149781233-149781261	-	TE	0.12341	0.25297	-0.12956	0.774	K2	0.9945	FALSE	exclusion
ENSG00000019991	HGF	38	7:81331897-81332073	-	TE	0.097846	0.37032	-0.27247	0.735	K1	0.9937	FALSE	exclusion
ENSG00000019991	HGF	39	7:81328322-81331896	-	TE	0.90271	0.63111	0.2716	0.741	K1	0.9937	FALSE	inclusion
ENSG00000020181	ADGRA2	22	8:37698604-37701494	+	TE	0.0022841	0.0025413	-0.00025718	0.528	K1	0	FALSE	exclusion
ENSG00000020181	ADGRA2	23	8:37701495-37702414	+	TE	0.99777	0.99742	0.00035186	0.56	K1	0	FALSE	inclusion
ENSG00000020922	MRE11	1	11:94227052-94227074	-	TS	0.10318	0.090209	0.012972	0.514	K4	0	FALSE	inclusion
ENSG00000020922	MRE11	2	11:94227041-94227051	-	TS	0.10326	0.089726	0.013531	0.506	K4	0	FALSE	inclusion
ENSG00000020922	MRE11	3	11:94227016-94227040	-	TS	0.099415	0.090315	0.0091003	0.511	K4	0	FALSE	inclusion
ENSG00000020922	MRE11	4	11:94227015-94227015	-	TS	0.10107	0.092026	0.0090484	0.51	K4	0	FALSE	inclusion
ENSG00000020922	MRE11	5	11:94227010-94227014	-	TS	0.10252	0.090968	0.01155	0.531	K4	0	FALSE	inclusion
ENSG00000020922	MRE11	6	11:94227001-94227009	-	TS	0.10215	0.091853	0.010301	0.507	K4	0	FALSE	inclusion
ENSG00000020922	MRE11	7	11:94226980-94227000	-	TS	0.10515	0.093249	0.011903	0.504	K4	0	FALSE	inclusion
ENSG00000020922	MRE11	8	11:94226979-94226979	-	TS	0.10309	0.090186	0.012904	0.548	K4	0	FALSE	inclusion
ENSG00000020922	MRE11	9	11:94226957-94226978	-	TS	0.89659	0.9091	-0.012507	0.537	K4	0	FALSE	exclusion
ENSG00000021355	SERPINB1	16	6:2833746-2833933	-	TE	0.099698	0.23978	-0.14008	0.659	K2	1.476	FALSE	exclusion
ENSG00000021355	SERPINB1	17	6:2833642-2833745	-	TE	0.12363	0.37057	-0.24695	0.803	K2	1.476	FALSE	exclusion
ENSG00000021355	SERPINB1	18	6:2832566-2833641	-	TE	0.87133	0.49263	0.3787	0.868	K2	1.476	FALSE	inclusion
ENSG00000021574	SPAST	18	2:32379443-32382705	+	TE	0.63503	0.63555	-0.00052106	0.532	K1	0.9341	FALSE	exclusion
ENSG00000021574	SPAST	19	2:32382706-32382706	+	TE	0.36346	0.3641	-0.0006443	0.502	K1	0.9341	FALSE	exclusion
ENSG00000022267	FHL1	24	X:135289350-135289710	+	TE	0.085591	0.10551	-0.019923	0.532	K1	0	FALSE	exclusion
ENSG00000022267	FHL1	25	X:135289711-135289820	+	TE	0.91244	0.8979	0.014548	0.527	K1	0	FALSE	inclusion
ENSG00000022267	FHL1	34	X:135292030-135292113	+	TE	0.040307	0.035392	0.0049159	0.565	K2	0.9754	FALSE	inclusion
ENSG00000022267	FHL1	35	X:135292114-135292226	+	TE	0.2194	0.14594	0.073459	0.665	K2	0.9754	FALSE	inclusion
ENSG00000022267	FHL1	36	X:135292227-135293518	+	TE	0.78071	0.85416	-0.073451	0.664	K2	0.9754	FALSE	exclusion
ENSG00000022840	RNF10	70	12:121014393-121014681	+	TE	0.084871	0.18538	-0.1005	0.579	K3	0.9992	FALSE	exclusion
ENSG00000022840	RNF10	71	12:121014682-121014685	+	TE	0.2359	0.090727	0.14518	0.677	K3	0.9992	FALSE	inclusion
ENSG00000022840	RNF10	72	12:121014686-121014689	+	TE	0.088227	0.092005	-0.0037782	0.503	K3	0.9992	FALSE	exclusion
ENSG00000022840	RNF10	73	12:121014690-121014691	+	TE	0.086211	0.091127	-0.0049166	0.54	K3	0.9992	FALSE	exclusion
ENSG00000022840	RNF10	74	12:121014692-121015050	+	TE	0.08405	0.09187	-0.0078205	0.534	K3	0.9992	FALSE	exclusion
ENSG00000022840	RNF10	75	12:121015051-121015397	+	TE	0.76216	0.81537	-0.053207	0.581	K3	0.9992	FALSE	exclusion
ENSG00000022976	ZNF839	23	14:102807660-102807856	+	AA	0.92723	0.90656	0.020671	0.568	K0	0	FALSE	inclusion
ENSG00000022976	ZNF839	26	14:102808440-102808701	+	TE	0.20655	0.095499	0.11105	0.55	K2	0.9955	FALSE	inclusion
ENSG00000022976	ZNF839	27	14:102808702-102808704	+	TE	0.051818	0.054069	-0.0022502	0.529	K2	0.9955	FALSE	exclusion
ENSG00000022976	ZNF839	28	14:102808705-102809039	+	TE	0.49119	0.90689	-0.4157	0.794	K2	0.9955	FALSE	exclusion
ENSG00000022976	ZNF839	29	14:102809040-102809044	+	TE	0.35517	0.053664	0.3015	0.51	K2	0.9955	FALSE	inclusion
ENSG00000023191	RNH1	22	11:504889-504996	-	AA	0.89178	0.87867	0.013112	0.538	K0	0	FALSE	inclusion
ENSG00000023191	RNH1	25	11:503184-503570	-	TS	0.46467	0.59126	-0.12659	0.664	K1	0.9888	FALSE	exclusion
ENSG00000023191	RNH1	26	11:502250-503183	-	TS	0.53838	0.41031	0.12807	0.661	K1	0.9888	FALSE	inclusion
ENSG00000023191	RNH1	36	11:500484-500541	-	AD	0.92223	0.89573	0.0265	0.582	K0	0	FALSE	inclusion
ENSG00000023191	RNH1	37	11:500000-500483	-	RI	0.9033	0.8926	0.010701	0.52	K0	0	FALSE	inclusion
ENSG00000023191	RNH1	58	11:494779-494882	-	RI	0.9089	0.87553	0.033364	0.58	K0	0	FALSE	inclusion
ENSG00000023734	STRAP	16	12:16053881-16053946	+	CE	0.91604	0.87312	0.042922	0.586	K0	0	FALSE	inclusion
ENSG00000025293	PHF20	48	20:34535407-34538288	+	TE	0.90691	0.87542	0.031487	0.613	K1	0.0039	FALSE	inclusion
ENSG00000025293	PHF20	49	20:34538289-34538303	+	TE	0.093733	0.12949	-0.035752	0.59	K1	0.0039	FALSE	exclusion
ENSG00000025708	TYMP	9	22:50968184-50968332	-	RI	0.88369	0.93227	-0.048577	0.621	K0	0	FALSE	exclusion
ENSG00000025708	TYMP	10	22:50968161-50968183	-	AA	0.90638	0.9406	-0.034221	0.61	K0	0	FALSE	exclusion
ENSG00000025708	TYMP	11	22:50968149-50968160	-	AA	0.89334	0.93194	-0.038598	0.62	K0	0	FALSE	exclusion
ENSG00000025708	TYMP	12	22:50967925-50968148	-	CE	0.93535	0.93507	0.00028545	0.516	K0	0	FALSE	inclusion
ENSG00000025708	TYMP	13	22:50967768-50967924	-	RI	0.95892	0.95323	0.0056893	0.509	K0	0	FALSE	inclusion
ENSG00000025708	TYMP	14	22:50967565-50967767	-	CE	0.96256	0.96127	0.0012915	0.513	K0	0	FALSE	inclusion
ENSG00000025708	TYMP	15	22:50967040-50967564	-	RI	0.97256	0.97038	0.0021768	0.513	K0	0	FALSE	inclusion
ENSG00000025708	TYMP	16	22:50966941-50967039	-	CE	0.97512	0.96981	0.0053085	0.523	K0	0	FALSE	inclusion
ENSG00000025708	TYMP	21	22:50964675-50964905	-	CE	0.90162	0.89301	0.0086105	0.508	K0	0	FALSE	inclusion
ENSG00000025708	TYMP	22	22:50964586-50964674	-	RI	0.90652	0.8949	0.011623	0.52	K0	0	FALSE	inclusion
ENSG00000025708	TYMP	25	22:50964214-50964347	-	TE	0.7618	0.66004	0.10176	0.649	K3	0.9222	FALSE	inclusion
ENSG00000025708	TYMP	26	22:50964186-50964213	-	TE	0.24605	0.33888	-0.092832	0.665	K3	0.9222	FALSE	exclusion
ENSG00000025708	TYMP	27	22:50964185-50964185	-	TE	0.1157	0.12549	-0.0097893	0.525	K3	0.9222	FALSE	exclusion
ENSG00000025708	TYMP	28	22:50964184-50964184	-	TE	0.11416	0.12299	-0.0088336	0.537	K3	0.9222	FALSE	exclusion
ENSG00000025708	TYMP	29	22:50964181-50964183	-	TE	0.11222	0.12357	-0.011352	0.519	K3	0.9222	FALSE	exclusion
ENSG00000025796	SEC63	1	6:108279316-108279393	-	TS	0.1305	0.086475	0.044023	0.59	K2	1.3152	FALSE	inclusion
ENSG00000025796	SEC63	2	6:108279247-108279315	-	TS	0.58823	0.61299	-0.024759	0.528	K2	1.3152	FALSE	exclusion
ENSG00000025796	SEC63	3	6:108279136-108279246	-	TS	0.27848	0.32408	-0.045601	0.598	K2	1.3152	FALSE	exclusion
ENSG00000025796	SEC63	4	6:108279090-108279135	-	TS	0.26636	0.13547	0.13088	0.771	K2	1.3152	FALSE	inclusion
ENSG00000025796	SEC63	24	6:108222574-108222721	-	CE	0.89501	0.91985	-0.024836	0.553	K0	0	FALSE	exclusion
ENSG00000025796	SEC63	25	6:108218853-108218935	-	CE	0.89862	0.91469	-0.016074	0.54	K0	0	FALSE	exclusion
ENSG00000025796	SEC63	26	6:108215042-108215101	-	CE	0.87409	0.889	-0.014903	0.54	K0	0	FALSE	exclusion
ENSG00000025796	SEC63	33	6:108202353-108202454	-	CE	0.89445	0.90763	-0.013181	0.543	K0	0	FALSE	exclusion
ENSG00000025796	SEC63	36	6:108197768-108197866	-	CE	0.88805	0.88332	0.0047281	0.549	K0	0	FALSE	inclusion
ENSG00000026025	VIM	1	10:17270258-17270513	+	TS	0.070152	0.11733	-0.047176	0.638	K1	0	FALSE	exclusion
ENSG00000026025	VIM	2	10:17270514-17270523	+	TS	0.92695	0.87874	0.048213	0.617	K1	0	FALSE	inclusion
ENSG00000026025	VIM	6	10:17271277-17271289	+	TS	0.9086	0.91203	-0.0034258	0.515	K1	0	FALSE	exclusion
ENSG00000026025	VIM	7	10:17271290-17271749	+	TS	0.089779	0.08797	0.0018096	0.503	K1	0	FALSE	inclusion
ENSG00000026025	VIM	7	10:17271290-17271749	+	TE	0.044126	0.093642	-0.049516	0.548	K2	0.9431	FALSE	exclusion
ENSG00000026025	VIM	8	10:17271750-17271869	+	TE	0.042677	0.046411	-0.0037347	0.553	K2	0.9431	FALSE	exclusion
ENSG00000026025	VIM	9	10:17271870-17271949	+	TE	0.95664	0.90753	0.04911	0.526	K2	0.9431	FALSE	inclusion
ENSG00000026036	RTEL1-TNFRSF6B	19	20:62318991-62319123	+	CE	0.90058	0.91967	-0.019087	0.57	K0	0	FALSE	exclusion
ENSG00000026036	RTEL1-TNFRSF6B	20	20:62319124-62319289	+	RI	0.90987	0.90466	0.0052153	0.513	K0	0	FALSE	inclusion
ENSG00000026036	RTEL1-TNFRSF6B	21	20:62319290-62319403	+	CE	0.87316	0.86715	0.0060056	0.501	K0	0	FALSE	inclusion
ENSG00000026036	RTEL1-TNFRSF6B	28	20:62321103-62321218	+	CE	0.9147	0.91416	0.0005468	0.516	K0	0	FALSE	inclusion
ENSG00000026036	RTEL1-TNFRSF6B	29	20:62321219-62321439	+	RI	0.9382	0.92433	0.013867	0.558	K0	0	FALSE	inclusion
ENSG00000026036	RTEL1-TNFRSF6B	30	20:62321440-62321563	+	CE	0.88413	0.88689	-0.0027581	0.506	K0	0	FALSE	exclusion
ENSG00000026036	RTEL1-TNFRSF6B	33	20:62323095-62323190	+	CE	0.91661	0.92524	-0.0086291	0.534	K0	0	FALSE	exclusion
ENSG00000026036	RTEL1-TNFRSF6B	34	20:62323191-62324157	+	RI	0.95841	0.9458	0.012608	0.575	K0	0	FALSE	inclusion
ENSG00000026036	RTEL1-TNFRSF6B	35	20:62324158-62324356	+	CE	0.92015	0.89313	0.027015	0.57	K0	0	FALSE	inclusion
ENSG00000026036	RTEL1-TNFRSF6B	40	20:62326681-62326833	+	CE	0.92207	0.91601	0.006063	0.506	K0	0	FALSE	inclusion
ENSG00000026036	RTEL1-TNFRSF6B	41	20:62326834-62327003	+	AD	0.91981	0.91689	0.0029162	0.53	K0	0	FALSE	inclusion
ENSG00000026036	RTEL1-TNFRSF6B	42	20:62327131-62327207	+	CE	0.91351	0.93317	-0.019657	0.574	K0	0	FALSE	exclusion
ENSG00000026036	RTEL1-TNFRSF6B	43	20:62327208-62328112	+	RI	0.9535	0.96704	-0.01354	0.575	K0	0	FALSE	exclusion
ENSG00000026036	RTEL1-TNFRSF6B	44	20:62328113-62328544	+	CE	0.91027	0.94898	-0.038708	0.604	K0	0	FALSE	exclusion
ENSG00000026036	RTEL1-TNFRSF6B	46	20:62329633-62330033	+	TE	0.047372	0.047287	8.5124e-05	0.524	K1	0	FALSE	inclusion
ENSG00000026036	RTEL1-TNFRSF6B	47	20:62330034-62330037	+	TE	0.9509	0.95321	-0.0023101	0.524	K1	0	FALSE	exclusion
ENSG00000026103	FAS	7	10:90750717-90750776	+	TS	0.27671	0.48465	-0.20794	0.7	K1	0.9777	FALSE	exclusion
ENSG00000026103	FAS	8	10:90750777-90750969	+	TS	0.7289	0.51403	0.21488	0.71	K1	0.9777	FALSE	inclusion
ENSG00000026508	CD44	1	11:35160417-35160428	+	TS	0.1129	0.10734	0.0055618	0.535	K4	0.3136	FALSE	inclusion
ENSG00000026508	CD44	2	11:35160429-35160716	+	TS	0.11422	0.10735	0.006868	0.506	K4	0.3136	FALSE	inclusion
ENSG00000026508	CD44	3	11:35160717-35160717	+	TS	0.11169	0.10428	0.007409	0.528	K4	0.3136	FALSE	inclusion
ENSG00000026508	CD44	4	11:35160718-35160727	+	TS	0.87313	0.86926	0.0038634	0.527	K4	0.3136	FALSE	inclusion
ENSG00000026508	CD44	5	11:35160728-35160728	+	TS	0.11572	0.1052	0.010519	0.502	K4	0.3136	FALSE	inclusion
ENSG00000026508	CD44	6	11:35160729-35160734	+	TS	0.1096	0.10728	0.0023269	0.504	K4	0.3136	FALSE	inclusion
ENSG00000026508	CD44	7	11:35160735-35160832	+	TS	0.11624	0.10381	0.012429	0.517	K4	0.3136	FALSE	inclusion
ENSG00000026508	CD44	8	11:35160833-35160839	+	TS	0.11797	0.12576	-0.0077847	0.52	K4	0.3136	FALSE	exclusion
ENSG00000026508	CD44	9	11:35160840-35160850	+	TS	0.12078	0.10528	0.015497	0.561	K4	0.3136	FALSE	inclusion
ENSG00000026508	CD44	10	11:35160851-35160852	+	TS	0.11278	0.1049	0.0078876	0.542	K4	0.3136	FALSE	inclusion
ENSG00000026508	CD44	11	11:35160853-35160917	+	TS	0.11187	0.099374	0.012499	0.522	K4	0.3136	FALSE	inclusion
ENSG00000026652	AGPAT4	23	6:161557287-161557666	-	TE	0.10685	0.17034	-0.063486	0.587	K2	0.999	FALSE	exclusion
ENSG00000026652	AGPAT4	24	6:161551057-161557286	-	TE	0.56375	0.26902	0.29473	0.727	K2	0.999	FALSE	inclusion
ENSG00000026652	AGPAT4	25	6:161551011-161551056	-	TE	0.33852	0.57299	-0.23447	0.684	K2	0.999	FALSE	exclusion
ENSG00000028116	VRK2	33	2:58386484-58386919	+	TE	0.7142	0.6837	0.030505	0.615	K2	1.4991	FALSE	inclusion
ENSG00000028116	VRK2	34	2:58386920-58387002	+	TE	0.1537	0.11265	0.041049	0.507	K2	1.4991	FALSE	inclusion
ENSG00000028116	VRK2	35	2:58387003-58387006	+	TE	0.12216	0.17193	-0.049765	0.634	K2	1.4991	FALSE	exclusion
ENSG00000028116	VRK2	36	2:58387007-58387055	+	TE	0.016821	0.038634	-0.021813	0.65	K2	1.4991	FALSE	exclusion
ENSG00000028839	TBPL1	16	6:134308099-134308637	+	TE	0.011723	0.0071929	0.0045296	0.519	K1	0	FALSE	inclusion
ENSG00000028839	TBPL1	17	6:134308638-134311570	+	TE	0.98851	0.99284	-0.0043252	0.51	K1	0	FALSE	exclusion
ENSG00000029153	ARNTL2	25	12:27573329-27573466	+	TE	0.13163	0.12779	0.0038372	0.512	K3	1	FALSE	inclusion
ENSG00000029153	ARNTL2	26	12:27573467-27573482	+	TE	0.12592	0.12473	0.0011954	0.53	K3	1	FALSE	inclusion
ENSG00000029153	ARNTL2	27	12:27573483-27573523	+	TE	0.132	0.12673	0.005277	0.552	K3	1	FALSE	inclusion
ENSG00000029153	ARNTL2	28	12:27573524-27573658	+	TE	0.12652	0.12389	0.0026206	0.503	K3	1	FALSE	inclusion
ENSG00000029725	RABEP1	28	17:5281472-5281527	+	CE	0.92074	0.89162	0.029128	0.557	K0	0	FALSE	inclusion
ENSG00000029725	RABEP1	31	17:5284684-5284800	+	CE	0.89669	0.9179	-0.021212	0.581	K0	0	FALSE	exclusion
ENSG00000029725	RABEP1	33	17:5286417-5286518	+	TE	0.057334	0.18253	-0.1252	0.579	K1	0.5325	FALSE	exclusion
ENSG00000029725	RABEP1	34	17:5286519-5286720	+	TE	0.94334	0.81573	0.12761	0.557	K1	0.5325	FALSE	inclusion
ENSG00000029725	RABEP1	37	17:5286950-5288057	+	TE	0.0034399	0.0033236	0.00011633	0.544	K1	0	FALSE	inclusion
ENSG00000029725	RABEP1	38	17:5288058-5289129	+	TE	0.99654	0.99672	-0.00017794	0.517	K1	0	FALSE	exclusion
ENSG00000029993	HMGB3	10	X:150156250-150156350	+	TE	0.11904	0.063903	0.055134	0.688	K2	0	FALSE	inclusion
ENSG00000029993	HMGB3	11	X:150156351-150156365	+	TE	0.12208	0.06437	0.057706	0.712	K2	0	FALSE	inclusion
ENSG00000029993	HMGB3	12	X:150156366-150156405	+	TE	0.12293	0.062448	0.06048	0.694	K2	0	FALSE	inclusion
ENSG00000029993	HMGB3	13	X:150156406-150159248	+	TE	0.87697	0.93648	-0.059505	0.718	K2	0	FALSE	exclusion
ENSG00000030304	MUSK	16	9:113538068-113538243	+	CE	0.91772	0.94438	-0.026662	0.613	K0	0	FALSE	exclusion
ENSG00000030304	MUSK	22	9:113562586-113563278	+	TE	0.15111	0.19294	-0.041833	0.594	K1	0.9714	FALSE	exclusion
ENSG00000030304	MUSK	23	9:113563279-113563859	+	TE	0.8464	0.80799	0.038411	0.558	K1	0.9714	FALSE	inclusion
ENSG00000033011	ALG1	1	16:5083703-5083960	+	TS	0.094709	0.082436	0.012273	0.566	K1	0	FALSE	inclusion
ENSG00000033011	ALG1	2	16:5083961-5084062	+	TS	0.90871	0.91765	-0.0089337	0.528	K1	0	FALSE	exclusion
ENSG00000033011	ALG1	29	16:5134751-5135019	+	TE	0.022476	0.022151	0.0003244	0.505	K1	0	FALSE	inclusion
ENSG00000033011	ALG1	30	16:5135020-5135058	+	TE	0.97725	0.97806	-0.00081262	0.501	K1	0	FALSE	exclusion
ENSG00000033011	ALG1	32	16:5135072-5135391	+	TE	0.29709	0.018672	0.27842	0.892	K1	0.9115	FALSE	inclusion
ENSG00000033011	ALG1	33	16:5135392-5135395	+	TE	0.70362	0.98132	-0.2777	0.883	K1	0.9115	FALSE	exclusion
ENSG00000033170	FUT8	1	14:65877310-65877839	+	TS	0.019405	0.025084	-0.005679	0.573	K3	1.7475	FALSE	exclusion
ENSG00000033170	FUT8	2	14:65877840-65878580	+	TS	0.11224	0.16911	-0.056873	0.568	K3	1.7475	FALSE	exclusion
ENSG00000033170	FUT8	3	14:65878581-65878582	+	TS	0.71157	0.55584	0.15573	0.659	K3	1.7475	FALSE	inclusion
ENSG00000033170	FUT8	4	14:65878583-65878591	+	TS	0.018991	0.025399	-0.0064086	0.543	K3	1.7475	FALSE	exclusion
ENSG00000033170	FUT8	5	14:65878592-65878608	+	TS	0.18027	0.13108	0.049189	0.544	K3	1.7475	FALSE	inclusion
ENSG00000033170	FUT8	6	14:65878609-65878653	+	TS	0.024583	0.040865	-0.016282	0.572	K3	1.7475	FALSE	exclusion
ENSG00000033170	FUT8	7	14:65878654-65878711	+	TS	0.030383	0.1787	-0.14832	0.629	K3	1.7475	FALSE	exclusion
ENSG00000033170	FUT8	8	14:65879535-65879723	+	TS	0.33883	0.50812	-0.16929	0.639	K3	1.2945	FALSE	exclusion
ENSG00000033170	FUT8	9	14:65879724-65879725	+	TS	0.085004	0.28836	-0.20336	0.82	K3	1.2945	FALSE	exclusion
ENSG00000033170	FUT8	10	14:65879726-65879736	+	TS	0.11116	0.10823	0.0029336	0.509	K3	1.2945	FALSE	inclusion
ENSG00000033170	FUT8	11	14:65879737-65879739	+	TS	0.08348	0.11013	-0.026645	0.588	K3	1.2945	FALSE	exclusion
ENSG00000033170	FUT8	12	14:65879740-65879786	+	TS	0.60218	0.29506	0.30712	0.765	K3	1.2945	FALSE	inclusion
ENSG00000033170	FUT8	13	14:65879787-65879932	+	TS	0.11697	0.12915	-0.012177	0.543	K3	1.2945	FALSE	exclusion
ENSG00000033627	ATP6V0A1	62	17:40669945-40672352	+	TS	0.05431	0.054725	-0.0004147	0.523	K2	0	FALSE	exclusion
ENSG00000033627	ATP6V0A1	63	17:40672353-40672400	+	TS	0.05611	0.055434	0.0006752	0.504	K2	0	FALSE	inclusion
ENSG00000033627	ATP6V0A1	64	17:40672401-40672641	+	TS	0.94529	0.94341	0.0018776	0.522	K2	0	FALSE	inclusion
ENSG00000034533	ASTE1	27	3:130732826-130733231	-	TE	0.042846	0.1774	-0.13455	0.848	K1	0.971	FALSE	exclusion
ENSG00000034533	ASTE1	28	3:130732719-130732825	-	TE	0.95493	0.82368	0.13125	0.837	K1	0.971	FALSE	inclusion
ENSG00000034677	RNF19A	39	8:101271392-101271474	-	TE	0.044123	0.052105	-0.0079822	0.542	K3	1.5587	FALSE	exclusion
ENSG00000034677	RNF19A	40	8:101271291-101271391	-	TE	0.7117	0.34992	0.36178	0.809	K3	1.5587	FALSE	inclusion
ENSG00000034677	RNF19A	41	8:101271113-101271290	-	TE	0.19894	0.21328	-0.014336	0.557	K3	1.5587	FALSE	exclusion
ENSG00000034677	RNF19A	42	8:101269570-101271112	-	TE	0.050831	0.15548	-0.10465	0.753	K3	1.5587	FALSE	exclusion
ENSG00000034677	RNF19A	43	8:101269288-101269569	-	TE	0.12626	0.38913	-0.26286	0.758	K3	1.5587	FALSE	exclusion
ENSG00000034713	GABARAPL2	10	16:75611429-75611779	+	TE	0.62345	0.8892	-0.26575	0.898	K1	0.9981	FALSE	exclusion
ENSG00000035403	VCL	31	10:75877781-75878237	+	TE	0.13395	0.1226	0.01135	0.531	K2	1.013	FALSE	inclusion
ENSG00000035403	VCL	32	10:75878238-75879910	+	TE	0.86403	0.55073	0.3133	0.678	K2	1.013	FALSE	inclusion
ENSG00000035403	VCL	33	10:75879911-75879918	+	TE	0.014872	0.34272	-0.32785	0.6	K2	1.013	FALSE	exclusion
ENSG00000035681	NSMAF	66	8:59496368-59496759	-	TE	0.24937	0.34604	-0.096673	0.523	K2	1.3374	FALSE	exclusion
ENSG00000035681	NSMAF	67	8:59496329-59496367	-	TE	0.10833	0.25479	-0.14646	0.581	K2	1.3374	FALSE	exclusion
ENSG00000035681	NSMAF	68	8:59496063-59496328	-	TE	0.75569	0.47806	0.27763	0.746	K2	1.3374	FALSE	inclusion
ENSG00000037897	METTL1	1	12:58165903-58166576	-	TS	0.097632	0.0854	0.012232	0.559	K3	0	FALSE	inclusion
ENSG00000037897	METTL1	2	12:58165900-58165902	-	TS	0.1	0.084505	0.015499	0.536	K3	0	FALSE	inclusion
ENSG00000037897	METTL1	3	12:58165898-58165899	-	TS	0.095641	0.085941	0.0097001	0.549	K3	0	FALSE	inclusion
ENSG00000037897	METTL1	4	12:58165885-58165897	-	TS	0.10026	0.085007	0.015251	0.539	K3	0	FALSE	inclusion
ENSG00000037897	METTL1	5	12:58165860-58165884	-	TS	0.098036	0.085694	0.012342	0.514	K3	0	FALSE	inclusion
ENSG00000037897	METTL1	6	12:58165757-58165859	-	TS	0.9034	0.91288	-0.0094814	0.549	K3	0	FALSE	exclusion
ENSG00000039123	MTREX	41	5:54720548-54720813	+	TE	0.0073253	0.0087173	-0.001392	0.562	K2	0	FALSE	exclusion
ENSG00000039123	MTREX	42	5:54720814-54720934	+	TE	0.007012	0.0090841	-0.002072	0.555	K2	0	FALSE	exclusion
ENSG00000039123	MTREX	43	5:54720935-54721409	+	TE	0.99289	0.99128	0.001603	0.559	K2	0	FALSE	inclusion
ENSG00000039319	ZFYVE16	43	5:79773038-79773130	+	TE	0.2291	0.15797	0.071133	0.723	K3	0.9087	FALSE	inclusion
ENSG00000039319	ZFYVE16	44	5:79773131-79774937	+	TE	0.0056637	0.0094212	-0.0037575	0.653	K3	0.9087	FALSE	exclusion
ENSG00000039319	ZFYVE16	45	5:79774938-79774954	+	TE	0.0056375	0.016625	-0.010987	0.703	K3	0.9087	FALSE	exclusion
ENSG00000039319	ZFYVE16	46	5:79774955-79774959	+	TE	0.0056773	0.0094557	-0.0037784	0.625	K3	0.9087	FALSE	exclusion
ENSG00000039319	ZFYVE16	47	5:79774960-79774972	+	TE	0.016555	0.0094359	0.0071191	0.574	K3	0.9087	FALSE	inclusion
ENSG00000039319	ZFYVE16	48	5:79774973-79775169	+	TE	0.75975	0.83428	-0.074529	0.71	K3	0.9087	FALSE	exclusion
ENSG00000039523	RIPOR1	33	16:67574109-67574202	+	RI	0.87325	0.89026	-0.017005	0.544	K0	0	FALSE	exclusion
ENSG00000039523	RIPOR1	46	16:67575770-67576568	+	TE	0.92556	0.7713	0.15426	0.524	K1	0.0142	FALSE	inclusion
ENSG00000039523	RIPOR1	47	16:67576569-67576571	+	TE	0.076212	0.22953	-0.15332	0.52	K1	0.0142	FALSE	exclusion
ENSG00000039523	RIPOR1	51	16:67577254-67577372	+	CE	0.89184	0.87716	0.014679	0.531	K0	0	FALSE	inclusion
ENSG00000039523	RIPOR1	67	16:67580269-67580540	+	TE	0.15487	0.08223	0.072637	0.698	K2	0.618	FALSE	inclusion
ENSG00000039523	RIPOR1	68	16:67580541-67580689	+	TE	0.09202	0.082816	0.009204	0.514	K2	0.618	FALSE	inclusion
ENSG00000039523	RIPOR1	69	16:67580690-67580691	+	TE	0.84127	0.92007	-0.078799	0.692	K2	0.618	FALSE	exclusion
ENSG00000040531	CTNS	4	17:3540019-3540022	+	TS	0.071479	0.058875	0.012604	0.564	K3	0	FALSE	inclusion
ENSG00000040531	CTNS	5	17:3540023-3540025	+	TS	0.068787	0.057897	0.01089	0.569	K3	0	FALSE	inclusion
ENSG00000040531	CTNS	6	17:3540026-3540040	+	TS	0.069652	0.058992	0.01066	0.587	K3	0	FALSE	inclusion
ENSG00000040531	CTNS	7	17:3540041-3540051	+	TS	0.067675	0.058322	0.0093535	0.55	K3	0	FALSE	inclusion
ENSG00000040531	CTNS	8	17:3540052-3540053	+	TS	0.069139	0.058977	0.010162	0.583	K3	0	FALSE	inclusion
ENSG00000040531	CTNS	9	17:3540054-3540055	+	TS	0.070418	0.057099	0.013319	0.625	K3	0	FALSE	inclusion
ENSG00000040531	CTNS	10	17:3540056-3540125	+	TS	0.93011	0.94082	-0.010708	0.572	K3	0	FALSE	exclusion
ENSG00000040531	CTNS	31	17:3563530-3563644	+	CE	0.93348	0.93719	-0.0037086	0.505	K0	0	FALSE	exclusion
ENSG00000040531	CTNS	32	17:3563645-3563910	+	RI	0.95548	0.95914	-0.0036545	0.515	K0	0	FALSE	exclusion
ENSG00000040531	CTNS	33	17:3563911-3563980	+	TE	0.011151	0.010616	0.00053479	0.501	K2	0.6341	FALSE	inclusion
ENSG00000040531	CTNS	34	17:3563981-3564331	+	TE	0.01295	0.037241	-0.024291	0.531	K2	0.6341	FALSE	exclusion
ENSG00000040531	CTNS	35	17:3564332-3564832	+	TE	0.010811	0.010827	-1.5304e-05	0.527	K2	0.6341	FALSE	exclusion
ENSG00000040531	CTNS	36	17:3564833-3564836	+	TE	0.98734	0.96314	0.024203	0.549	K2	0.6341	FALSE	inclusion
ENSG00000040933	INPP4A	44	2:99203939-99204036	+	TE	0.071745	0.087031	-0.015286	0.554	K3	0.0773	FALSE	exclusion
ENSG00000040933	INPP4A	45	2:99204037-99204071	+	TE	0.35877	0.089475	0.26929	0.544	K3	0.0773	FALSE	inclusion
ENSG00000040933	INPP4A	46	2:99204072-99204124	+	TE	0.07256	0.087456	-0.014897	0.521	K3	0.0773	FALSE	exclusion
ENSG00000040933	INPP4A	47	2:99204125-99204322	+	TE	0.073404	0.088744	-0.01534	0.54	K3	0.0773	FALSE	exclusion
ENSG00000040933	INPP4A	48	2:99204323-99207496	+	TE	0.072589	0.088627	-0.016038	0.548	K3	0.0773	FALSE	exclusion
ENSG00000040933	INPP4A	49	2:99207497-99210853	+	TE	0.63893	0.90999	-0.27106	0.548	K3	0.0773	FALSE	exclusion
ENSG00000041802	LSG1	30	3:194362902-194362976	-	TE	0.050545	0.085993	-0.035449	0.58	K2	0.6935	FALSE	exclusion
ENSG00000041802	LSG1	31	3:194362842-194362901	-	TE	0.05057	0.39121	-0.34064	0.728	K2	0.6935	FALSE	exclusion
ENSG00000041802	LSG1	32	3:194361517-194362841	-	TE	0.95091	0.60828	0.34263	0.741	K2	0.6935	FALSE	inclusion
ENSG00000042062	RIPOR3	22	20:49211252-49211334	-	AA	0.92773	0.91497	0.012763	0.534	K0	0	FALSE	inclusion
ENSG00000042062	RIPOR3	23	20:49211090-49211251	-	CE	0.88456	0.881	0.0035544	0.532	K0	0	FALSE	inclusion
ENSG00000042062	RIPOR3	31	20:49203337-49203869	-	TE	0.0079615	0.0092136	-0.0012521	0.522	K2	0.7155	FALSE	exclusion
ENSG00000042062	RIPOR3	32	20:49203202-49203336	-	TE	0.06683	0.048945	0.017886	0.542	K2	0.7155	FALSE	inclusion
ENSG00000042062	RIPOR3	33	20:49202649-49203201	-	TE	0.27406	0.013605	0.26045	0.563	K2	0.7155	FALSE	inclusion
ENSG00000042062	RIPOR3	34	20:49202645-49202648	-	TE	0.66583	0.94653	-0.2807	0.624	K2	0.7155	FALSE	exclusion
ENSG00000042429	MED17	1	11:93517393-93517447	+	TS	0.53714	0.47972	0.057428	0.554	K2	1.4851	FALSE	inclusion
ENSG00000042429	MED17	2	11:93517448-93517527	+	TS	0.21053	0.37646	-0.16594	0.562	K2	1.4851	FALSE	exclusion
ENSG00000042429	MED17	3	11:93517528-93517576	+	TS	0.1098	0.095603	0.014193	0.541	K2	1.4851	FALSE	inclusion
ENSG00000042429	MED17	4	11:93517577-93517929	+	TS	0.36066	0.23681	0.12385	0.517	K2	1.4851	FALSE	inclusion
ENSG00000042445	RETSAT	27	2:85570234-85570504	-	TE	0.18188	0.36809	-0.1862	0.808	K3	1.8549	FALSE	exclusion
ENSG00000042445	RETSAT	28	2:85570094-85570233	-	TE	0.022928	0.037752	-0.014824	0.616	K3	1.8549	FALSE	exclusion
ENSG00000042445	RETSAT	29	2:85569805-85570093	-	TE	0.59926	0.29974	0.29952	0.805	K3	1.8549	FALSE	inclusion
ENSG00000042445	RETSAT	30	2:85569222-85569804	-	TE	0.24459	0.34342	-0.098828	0.696	K3	1.8549	FALSE	exclusion
ENSG00000042445	RETSAT	31	2:85569211-85569221	-	TE	0.023432	0.024089	-0.00065738	0.513	K3	1.8549	FALSE	exclusion
ENSG00000043093	DCUN1D1	21	3:182662892-182662961	-	TE	0.013942	0.016044	-0.0021026	0.535	K2	0.7349	FALSE	exclusion
ENSG00000043093	DCUN1D1	22	3:182662822-182662891	-	TE	0.88665	0.89635	-0.009701	0.504	K2	0.7349	FALSE	exclusion
ENSG00000043093	DCUN1D1	23	3:182655862-182662821	-	TE	0.11294	0.10252	0.010421	0.524	K2	0.7349	FALSE	inclusion
ENSG00000044090	CUL7	30	6:43005358-43005749	-	TE	0.89226	0.89478	-0.0025139	0.508	K1	0	FALSE	exclusion
ENSG00000044090	CUL7	31	6:43005355-43005357	-	TE	0.1073	0.10496	0.0023405	0.53	K1	0	FALSE	inclusion
ENSG00000044115	CTNNA1	104	5:138269491-138269851	+	TE	0.19775	0.34366	-0.14591	0.648	K3	1.52	FALSE	exclusion
ENSG00000044115	CTNNA1	105	5:138269852-138269902	+	TE	0.16112	0.21727	-0.056154	0.504	K3	1.52	FALSE	exclusion
ENSG00000044115	CTNNA1	106	5:138269903-138270520	+	TE	0.47313	0.21381	0.25931	0.776	K3	1.52	FALSE	inclusion
ENSG00000044115	CTNNA1	107	5:138270521-138270717	+	TE	0.16816	0.35083	-0.18266	0.798	K3	1.52	FALSE	exclusion
ENSG00000044115	CTNNA1	108	5:138270718-138270722	+	TE	0.18481	0.11247	0.072336	0.606	K3	1.52	FALSE	inclusion
ENSG00000044115	CTNNA1	109	5:138270723-138270723	+	TE	0.10248	0.088342	0.014137	0.531	K3	1.52	FALSE	inclusion
ENSG00000046651	OFD1	11	X:13756965-13757033	+	CE	0.86685	0.8934	-0.026548	0.563	K0	0	FALSE	exclusion
ENSG00000046651	OFD1	15	X:13762534-13762638	+	CE	0.89756	0.8952	0.0023611	0.519	K0	0	FALSE	inclusion
ENSG00000046651	OFD1	16	X:13764438-13764574	+	CE	0.89362	0.89651	-0.0028898	0.509	K0	0	FALSE	exclusion
ENSG00000046651	OFD1	23	X:13773270-13773361	+	CE	0.92995	0.91996	0.0099916	0.531	K0	0	FALSE	inclusion
ENSG00000046651	OFD1	24	X:13774697-13774886	+	CE	0.88151	0.89901	-0.017501	0.541	K0	0	FALSE	exclusion
ENSG00000046653	GPM6B	24	X:13792456-13792743	-	TE	0.35505	0.39633	-0.041283	0.507	K1	0.9982	FALSE	exclusion
ENSG00000046653	GPM6B	25	X:13792073-13792455	-	TE	0.64276	0.60597	0.036791	0.503	K1	0.9982	FALSE	inclusion
ENSG00000046653	GPM6B	27	X:13790973-13791149	-	TE	0.053639	0.21812	-0.16448	0.577	K2	1.5509	FALSE	exclusion
ENSG00000046653	GPM6B	28	X:13790818-13790972	-	TE	0.25234	0.14364	0.1087	0.719	K2	1.5509	FALSE	inclusion
ENSG00000046653	GPM6B	29	X:13789575-13790817	-	TE	0.094494	0.18897	-0.094472	0.729	K2	1.5509	FALSE	exclusion
ENSG00000046653	GPM6B	30	X:13789150-13789574	-	TE	0.63938	0.48278	0.1566	0.677	K2	1.5509	FALSE	inclusion
ENSG00000047315	POLR2B	49	4:57897065-57897173	+	TE	0.60082	0.47546	0.12536	0.597	K2	0.4926	FALSE	inclusion
ENSG00000047315	POLR2B	50	4:57897174-57897324	+	TE	0.05255	0.10045	-0.047898	0.664	K2	0.4926	FALSE	exclusion
ENSG00000047315	POLR2B	51	4:57897325-57897334	+	TE	0.39811	0.51841	-0.1203	0.606	K2	0.4926	FALSE	exclusion
ENSG00000047457	CP	45	3:148891271-148891517	-	TE	0.0077193	0.0084777	-0.00075833	0.52	K2	0	FALSE	exclusion
ENSG00000047457	CP	46	3:148891254-148891270	-	TE	0.0077115	0.0084084	-0.0006969	0.542	K2	0	FALSE	exclusion
ENSG00000047457	CP	47	3:148890286-148891253	-	TE	0.99213	0.99155	0.00057356	0.559	K2	0	FALSE	inclusion
ENSG00000047457	CP	49	3:148880204-148880662	-	TE	0.33943	0.60468	-0.26524	0.635	K1	0.9886	FALSE	exclusion
ENSG00000047457	CP	50	3:148880197-148880203	-	TE	0.66098	0.39461	0.26637	0.664	K1	0.9886	FALSE	inclusion
ENSG00000047579	DTNBP1	26	6:15524343-15524756	-	TE	0.28632	0.15611	0.13021	0.659	K2	1.1903	FALSE	inclusion
ENSG00000047579	DTNBP1	27	6:15524216-15524342	-	TE	0.11225	0.39415	-0.28191	0.846	K2	1.1903	FALSE	exclusion
ENSG00000047579	DTNBP1	28	6:15523794-15524215	-	TE	0.66773	0.56309	0.10463	0.597	K2	1.1903	FALSE	inclusion
ENSG00000047648	ARHGAP6	1	X:11683204-11683821	-	TS	0.081225	0.058894	0.022332	0.559	K2	0	FALSE	inclusion
ENSG00000047648	ARHGAP6	2	X:11682949-11683203	-	TS	0.082632	0.057427	0.025206	0.55	K2	0	FALSE	inclusion
ENSG00000047648	ARHGAP6	3	X:11682361-11682948	-	TS	0.9185	0.94305	-0.024553	0.537	K2	0	FALSE	exclusion
ENSG00000047849	MAP4	52	3:47894110-47894428	-	TE	0.035442	0.068185	-0.032743	0.664	K3	1.1057	FALSE	exclusion
ENSG00000047849	MAP4	53	3:47893635-47894109	-	TE	0.036603	0.06692	-0.030317	0.658	K3	1.1057	FALSE	exclusion
ENSG00000047849	MAP4	54	3:47893358-47893634	-	TE	0.036623	0.067158	-0.030535	0.662	K3	1.1057	FALSE	exclusion
ENSG00000047849	MAP4	55	3:47892584-47893357	-	TE	0.036254	0.064869	-0.028615	0.662	K3	1.1057	FALSE	exclusion
ENSG00000047849	MAP4	56	3:47892186-47892583	-	TE	0.64006	0.63042	0.0096322	0.537	K3	1.1057	FALSE	inclusion
ENSG00000047849	MAP4	57	3:47892185-47892185	-	TE	0.32245	0.33641	-0.01397	0.518	K3	1.1057	FALSE	exclusion
ENSG00000047849	MAP4	58	3:47892182-47892184	-	TE	0.071381	0.099495	-0.028114	0.614	K3	1.1057	FALSE	exclusion
ENSG00000048052	HDAC9	82	7:19035646-19035685	+	TE	0.012568	0.0066898	0.0058778	0.628	K3	1.9794	FALSE	inclusion
ENSG00000048052	HDAC9	83	7:19035686-19035820	+	TE	0.25119	0.28804	-0.036849	0.553	K3	1.9794	FALSE	exclusion
ENSG00000048052	HDAC9	85	7:19035967-19036922	+	TE	0.33537	0.21641	0.11896	0.701	K3	1.9794	FALSE	inclusion
ENSG00000048052	HDAC9	86	7:19036923-19042039	+	TE	0.39597	0.3372	0.058772	0.622	K3	1.9794	FALSE	inclusion
ENSG00000048162	NOP16	1	5:175815764-175815976	-	TS	0.0071069	0.010757	-0.0036498	0.562	K3	0.6015	FALSE	exclusion
ENSG00000048162	NOP16	2	5:175815600-175815763	-	TS	0.0073488	0.011316	-0.003967	0.553	K3	0.6015	FALSE	exclusion
ENSG00000048162	NOP16	3	5:175815589-175815599	-	TS	0.0071141	0.03519	-0.028075	0.63	K3	0.6015	FALSE	exclusion
ENSG00000048162	NOP16	4	5:175815577-175815588	-	TS	0.0073402	0.011066	-0.0037258	0.556	K3	0.6015	FALSE	exclusion
ENSG00000048162	NOP16	5	5:175815573-175815576	-	TS	0.0072164	0.011122	-0.0039053	0.599	K3	0.6015	FALSE	exclusion
ENSG00000048162	NOP16	6	5:175815570-175815572	-	TS	0.0072988	0.011159	-0.0038601	0.57	K3	0.6015	FALSE	exclusion
ENSG00000048162	NOP16	7	5:175815434-175815569	-	TS	0.99281	0.96456	0.028249	0.593	K3	0.6015	FALSE	inclusion
ENSG00000048162	NOP16	8	5:175815345-175815433	-	RI	0.87536	0.88425	-0.0088906	0.509	K0	0	FALSE	exclusion
ENSG00000048342	CC2D2A	61	4:15597708-15597766	+	AA	0.93634	0.91155	0.024787	0.554	K0	0	FALSE	inclusion
ENSG00000048342	CC2D2A	62	4:15597767-15597830	+	CE	0.86466	0.88332	-0.01866	0.563	K0	0	FALSE	exclusion
ENSG00000048342	CC2D2A	65	4:15602860-15602994	+	TE	0.4704	0.36552	0.10488	0.601	K2	0.9189	FALSE	inclusion
ENSG00000048342	CC2D2A	66	4:15602995-15603169	+	TE	0.041054	0.19704	-0.15598	0.639	K2	0.9189	FALSE	exclusion
ENSG00000048342	CC2D2A	67	4:15603170-15603175	+	TE	0.35386	0.24563	0.10822	0.515	K2	0.9189	FALSE	inclusion
ENSG00000048342	CC2D2A	68	4:15603176-15603180	+	TE	0.21477	0.28891	-0.07414	0.528	K2	0.9189	FALSE	exclusion
ENSG00000048540	LMO3	61	12:16704252-16704261	-	TE	0.11198	0.043522	0.068457	0.711	K5	2.0066	FALSE	inclusion
ENSG00000048540	LMO3	62	12:16704238-16704251	-	TE	0.10821	0.043913	0.064299	0.709	K5	2.0066	FALSE	inclusion
ENSG00000048540	LMO3	63	12:16704166-16704237	-	TE	0.10579	0.044941	0.060852	0.717	K5	2.0066	FALSE	inclusion
ENSG00000048540	LMO3	64	12:16704162-16704165	-	TE	0.36281	0.20031	0.1625	0.729	K5	2.0066	FALSE	inclusion
ENSG00000048540	LMO3	65	12:16704116-16704161	-	TE	0.1125	0.045628	0.066876	0.692	K5	2.0066	FALSE	inclusion
ENSG00000048540	LMO3	66	12:16703979-16704115	-	TE	0.10902	0.044492	0.064526	0.678	K5	2.0066	FALSE	inclusion
ENSG00000048540	LMO3	67	12:16703902-16703978	-	TE	0.10935	0.044668	0.064683	0.711	K5	2.0066	FALSE	inclusion
ENSG00000048540	LMO3	68	12:16703809-16703901	-	TE	0.10888	0.04466	0.064225	0.716	K5	2.0066	FALSE	inclusion
ENSG00000048540	LMO3	69	12:16703758-16703808	-	TE	0.10487	0.045191	0.059684	0.735	K5	2.0066	FALSE	inclusion
ENSG00000048540	LMO3	70	12:16703744-16703757	-	TE	0.10752	0.09888	0.0086394	0.589	K5	2.0066	FALSE	inclusion
ENSG00000048540	LMO3	71	12:16703383-16703743	-	TE	0.10874	0.044598	0.06414	0.718	K5	2.0066	FALSE	inclusion
ENSG00000048540	LMO3	72	12:16703317-16703382	-	TE	0.10672	0.044569	0.062151	0.704	K5	2.0066	FALSE	inclusion
ENSG00000048540	LMO3	73	12:16703136-16703316	-	TE	0.10954	0.044672	0.064865	0.695	K5	2.0066	FALSE	inclusion
ENSG00000048540	LMO3	74	12:16703133-16703135	-	TE	0.11043	0.053272	0.057155	0.698	K5	2.0066	FALSE	inclusion
ENSG00000048540	LMO3	75	12:16702309-16703132	-	TE	0.40037	0.096833	0.30354	0.864	K5	2.0066	FALSE	inclusion
ENSG00000048540	LMO3	76	12:16701359-16702308	-	TE	0.23741	0.40557	-0.16816	0.726	K5	2.0066	FALSE	exclusion
ENSG00000048540	LMO3	77	12:16701358-16701358	-	TE	0.19184	0.2497	-0.057853	0.612	K5	2.0066	FALSE	exclusion
ENSG00000048540	LMO3	78	12:16701355-16701357	-	TE	0.12204	0.091373	0.030669	0.563	K5	2.0066	FALSE	inclusion
ENSG00000048540	LMO3	79	12:16701354-16701354	-	TE	0.11885	0.068718	0.050131	0.66	K5	2.0066	FALSE	inclusion
ENSG00000048540	LMO3	80	12:16701307-16701353	-	TE	0.11144	0.04384	0.067595	0.718	K5	2.0066	FALSE	inclusion
ENSG00000048828	FAM120A	1	9:96214004-96214172	+	TS	0.12225	0.1178	0.0044438	0.505	K2	0.8751	FALSE	inclusion
ENSG00000048828	FAM120A	2	9:96214173-96214665	+	TS	0.87953	0.80564	0.073885	0.621	K2	0.8751	FALSE	inclusion
ENSG00000048828	FAM120A	3	9:96214666-96214671	+	TS	0.12691	0.19344	-0.066523	0.605	K2	0.8751	FALSE	exclusion
ENSG00000049449	RCN1	10	11:32113156-32113346	+	AF	0.10132	0.070475	0.030842	0.569	K0	0	FALSE	inclusion
ENSG00000049449	RCN1	12	11:32118690-32118883	+	CE	0.89745	0.92997	-0.032515	0.61	K0	0	FALSE	exclusion
ENSG00000049449	RCN1	23	11:32124827-32125026	+	CE	0.9437	0.89858	0.045121	0.61	K0	0	FALSE	inclusion
ENSG00000049449	RCN1	25	11:32125932-32126148	+	TE	0.1102	0.15958	-0.049373	0.539	K2	0.981	FALSE	exclusion
ENSG00000049449	RCN1	26	11:32126149-32126211	+	TE	0.10561	0.40634	-0.30073	0.756	K2	0.981	FALSE	exclusion
ENSG00000049449	RCN1	27	11:32126212-32126230	+	TE	0.89315	0.5324	0.36076	0.728	K2	0.981	FALSE	inclusion
ENSG00000049449	RCN1	29	11:32126235-32126832	+	RI	0.87904	0.89714	-0.018105	0.569	K0	0	FALSE	exclusion
ENSG00000049449	RCN1	30	11:32126833-32127077	+	TE	0.94275	0.93858	0.004172	0.501	K2	0.0001	FALSE	inclusion
ENSG00000049449	RCN1	31	11:32127078-32127078	+	TE	0.058273	0.060161	-0.0018883	0.512	K2	0.0001	FALSE	exclusion
ENSG00000049449	RCN1	32	11:32127079-32127082	+	TE	0.058651	0.061069	-0.0024183	0.517	K2	0.0001	FALSE	exclusion
ENSG00000049449	RCN1	33	11:32127083-32127301	+	TE	0.060315	0.059448	0.00086674	0.514	K2	0.0001	FALSE	inclusion
ENSG00000049618	ARID1B	1	6:157099063-157099063	+	TS	0.12015	0.11025	0.0099051	0.519	K2	0.8176	FALSE	inclusion
ENSG00000049618	ARID1B	4	6:157100567-157100605	+	TS	0.31334	0.10892	0.20442	0.88	K2	0.8176	FALSE	inclusion
ENSG00000049768	FOXP3	15	X:49107945-49108124	-	RI	0.91509	0.87975	0.035338	0.593	K0	0	FALSE	inclusion
ENSG00000049768	FOXP3	16	X:49107795-49107944	-	TE	0.044081	0.060526	-0.016445	0.561	K2	0.5726	FALSE	exclusion
ENSG00000049768	FOXP3	17	X:49106900-49107794	-	TE	0.33489	0.49547	-0.16058	0.603	K2	0.5726	FALSE	exclusion
ENSG00000049768	FOXP3	18	X:49106897-49106899	-	TE	0.66373	0.4837	0.18003	0.664	K2	0.5726	FALSE	inclusion
ENSG00000049860	HEXB	35	5:74018124-74018293	+	AA	0.94707	0.92956	0.017516	0.573	K0	0	FALSE	inclusion
ENSG00000050165	DKK3	43	11:11985978-11986016	-	TE	0.085919	0.13583	-0.049913	0.621	K2	0.0878	FALSE	exclusion
ENSG00000050165	DKK3	44	11:11985938-11985977	-	TE	0.38585	0.13365	0.2522	0.593	K2	0.0878	FALSE	inclusion
ENSG00000050165	DKK3	45	11:11984653-11985937	-	TE	0.61145	0.86398	-0.25253	0.553	K2	0.0878	FALSE	exclusion
ENSG00000050344	NFE2L3	4	7:26223321-26223404	+	CE	0.92397	0.89642	0.027556	0.591	K0	0	FALSE	inclusion
ENSG00000050344	NFE2L3	7	7:26224153-26225937	+	TE	0.11648	0.11731	-0.00083369	0.663	K1	0.9031	FALSE	exclusion
ENSG00000050344	NFE2L3	8	7:26225938-26226745	+	TE	0.88351	0.88207	0.0014437	0.634	K1	0.9031	FALSE	inclusion
ENSG00000050405	LIMA1	37	12:50571557-50571852	-	TE	0.2659	0.11421	0.15169	0.717	K3	1.4356	FALSE	inclusion
ENSG00000050405	LIMA1	38	12:50571481-50571556	-	TE	0.10086	0.10953	-0.0086615	0.519	K3	1.4356	FALSE	exclusion
ENSG00000050405	LIMA1	39	12:50570789-50571480	-	TE	0.17582	0.21144	-0.035625	0.515	K3	1.4356	FALSE	exclusion
ENSG00000050405	LIMA1	40	12:50570668-50570788	-	TE	0.095529	0.11177	-0.016238	0.551	K3	1.4356	FALSE	exclusion
ENSG00000050405	LIMA1	41	12:50569573-50570667	-	TE	0.53299	0.64553	-0.11254	0.664	K3	1.4356	FALSE	exclusion
ENSG00000050405	LIMA1	42	12:50569571-50569572	-	TE	0.22311	0.24685	-0.023744	0.527	K3	1.4356	FALSE	exclusion
ENSG00000051180	RAD51	23	15:41023253-41023557	+	TE	0.1113	0.10112	0.010175	0.54	K3	1.0535	FALSE	inclusion
ENSG00000051180	RAD51	24	15:41023558-41023614	+	TE	0.099211	0.10472	-0.0055054	0.546	K3	1.0535	FALSE	exclusion
ENSG00000051180	RAD51	25	15:41023615-41023755	+	TE	0.098965	0.1006	-0.0016374	0.523	K3	1.0535	FALSE	exclusion
ENSG00000051180	RAD51	26	15:41023756-41023788	+	TE	0.10249	0.099044	0.0034427	0.504	K3	1.0535	FALSE	inclusion
ENSG00000051180	RAD51	27	15:41023789-41023790	+	TE	0.10091	0.0999	0.0010082	0.519	K3	1.0535	FALSE	inclusion
ENSG00000051180	RAD51	28	15:41023791-41023791	+	TE	0.38182	0.10139	0.28043	0.822	K3	1.0535	FALSE	inclusion
ENSG00000051180	RAD51	29	15:41023792-41024354	+	TE	0.61073	0.89596	-0.28523	0.806	K3	1.0535	FALSE	exclusion
ENSG00000051620	HEBP2	8	6:138734017-138734291	+	TE	0.030592	0.034557	-0.0039653	0.53	K2	0	FALSE	exclusion
ENSG00000051620	HEBP2	9	6:138734292-138734310	+	TE	0.031902	0.035297	-0.0033947	0.514	K2	0	FALSE	exclusion
ENSG00000051620	HEBP2	10	6:138734311-138743334	+	TE	0.9685	0.96514	0.0033554	0.515	K2	0	FALSE	inclusion
ENSG00000051825	MPHOSPH9	1	12:123728500-123728561	-	TS	0.096681	0.098705	-0.0020243	0.511	K1	0	FALSE	exclusion
ENSG00000051825	MPHOSPH9	2	12:123728400-123728499	-	TS	0.90369	0.90142	0.0022647	0.51	K1	0	FALSE	inclusion
ENSG00000052344	PRSS8	16	16:31143215-31143656	-	TE	0.62635	0.34996	0.27639	0.816	K1	0.9847	FALSE	inclusion
ENSG00000052344	PRSS8	17	16:31142756-31143214	-	TE	0.3757	0.65157	-0.27588	0.811	K1	0.9847	FALSE	exclusion
ENSG00000053254	FOXN3	39	14:89629222-89629313	-	TE	0.094089	0.13442	-0.040329	0.586	K3	0.5395	FALSE	exclusion
ENSG00000053254	FOXN3	40	14:89628706-89629221	-	TE	0.092222	0.12534	-0.033118	0.607	K3	0.5395	FALSE	exclusion
ENSG00000053254	FOXN3	41	14:89627729-89628705	-	TE	0.13129	0.13013	0.0011549	0.525	K3	0.5395	FALSE	inclusion
ENSG00000053254	FOXN3	42	14:89622529-89627728	-	TE	0.8264	0.83682	-0.01042	0.535	K3	0.5395	FALSE	exclusion
ENSG00000053254	FOXN3	43	14:89622516-89622528	-	TE	0.13296	0.17462	-0.041654	0.557	K3	0.5395	FALSE	exclusion
ENSG00000053372	MRTO4	12	1:19585175-19585233	+	TE	0.096156	0.10346	-0.0073052	0.521	K1	0	FALSE	exclusion
ENSG00000053372	MRTO4	13	1:19585234-19586622	+	TE	0.90316	0.89555	0.0076101	0.519	K1	0	FALSE	inclusion
ENSG00000053438	NNAT	1	20:36149617-36149620	+	TS	0.077523	0.099686	-0.022163	0.576	K1	0	FALSE	exclusion
ENSG00000053438	NNAT	2	20:36149621-36149805	+	TS	0.92218	0.90253	0.01965	0.564	K1	0	FALSE	inclusion
ENSG00000053524	MCF2L2	23	3:183017557-183017792	-	TE	0.14197	0.025775	0.1162	0.735	K1	0.8752	FALSE	inclusion
ENSG00000053524	MCF2L2	24	3:183016215-183017556	-	TE	0.8601	0.97402	-0.11392	0.735	K1	0.8752	FALSE	exclusion
ENSG00000053702	NRIP2	4	12:2944008-2944114	-	AA	0.92925	0.93292	-0.0036639	0.519	K0	0	FALSE	exclusion
ENSG00000053702	NRIP2	5	12:2943808-2944007	-	CE	0.93366	0.92116	0.012498	0.525	K0	0	FALSE	inclusion
ENSG00000054148	PHPT1	9	9:139744465-139744589	+	CE	0.92935	0.95249	-0.023135	0.616	K0	0	FALSE	exclusion
ENSG00000054148	PHPT1	10	9:139744590-139744954	+	RI	0.89489	0.91249	-0.017603	0.562	K0	0	FALSE	exclusion
ENSG00000054148	PHPT1	13	9:139745207-139745474	+	TE	0.89705	0.76376	0.13329	0.513	K2	0	FALSE	inclusion
ENSG00000054148	PHPT1	14	9:139745475-139745476	+	TE	0.10433	0.23375	-0.12942	0.53	K2	0	FALSE	exclusion
ENSG00000054148	PHPT1	15	9:139745477-139745479	+	TE	0.10453	0.10426	0.00026937	0.539	K2	0	FALSE	inclusion
ENSG00000054148	PHPT1	16	9:139745480-139745488	+	TE	0.10513	0.10405	0.0010757	0.505	K2	0	FALSE	inclusion
ENSG00000054282	SDCCAG8	40	1:243663058-243663388	+	TE	0.0069421	0.013582	-0.0066396	0.696	K3	0.0092	FALSE	exclusion
ENSG00000054282	SDCCAG8	41	1:243663389-243663391	+	TE	0.99228	0.98534	0.006934	0.685	K3	0.0092	FALSE	inclusion
ENSG00000054282	SDCCAG8	42	1:243663392-243663392	+	TE	0.0075825	0.01421	-0.0066279	0.661	K3	0.0092	FALSE	exclusion
ENSG00000054282	SDCCAG8	43	1:243663393-243663393	+	TE	0.0068779	0.013292	-0.006414	0.697	K3	0.0092	FALSE	exclusion
ENSG00000054282	SDCCAG8	44	1:243663394-243663394	+	TE	0.0068926	0.013282	-0.0063894	0.666	K3	0.0092	FALSE	exclusion
ENSG00000054523	KIF1B	66	1:10438397-10441655	+	TE	0.47736	0.87439	-0.39702	0.714	K1	0.3022	FALSE	exclusion
ENSG00000054523	KIF1B	67	1:10441656-10441661	+	TE	0.52524	0.12819	0.39705	0.728	K1	0.3022	FALSE	inclusion
ENSG00000054690	PLEKHH1	64	14:68055511-68055948	+	TE	0.072859	0.082728	-0.0098689	0.537	K3	0.4877	FALSE	exclusion
ENSG00000054690	PLEKHH1	65	14:68055949-68056157	+	TE	0.071567	0.079712	-0.0081445	0.506	K3	0.4877	FALSE	exclusion
ENSG00000054690	PLEKHH1	66	14:68056158-68056250	+	TE	0.072601	0.083195	-0.010594	0.526	K3	0.4877	FALSE	exclusion
ENSG00000054690	PLEKHH1	67	14:68056251-68056328	+	TE	0.83677	0.83226	0.0045057	0.519	K3	0.4877	FALSE	inclusion
ENSG00000054690	PLEKHH1	68	14:68056329-68056329	+	TE	0.1642	0.17114	-0.0069356	0.508	K3	0.4877	FALSE	exclusion
ENSG00000054965	FAM168A	12	11:73117028-73117789	-	TE	0.0887	0.042424	0.046276	0.749	K1	0.6772	FALSE	inclusion
ENSG00000054965	FAM168A	13	11:73111532-73117027	-	TE	0.91071	0.95755	-0.046833	0.753	K1	0.6772	FALSE	exclusion
ENSG00000054967	RELT	26	11:73106489-73107685	+	TE	0.42934	0.39525	0.034089	0.521	K2	0.9889	FALSE	inclusion
ENSG00000054967	RELT	27	11:73107686-73107689	+	TE	0.101	0.12367	-0.022671	0.568	K2	0.9889	FALSE	exclusion
ENSG00000054967	RELT	28	11:73107690-73108517	+	TE	0.49418	0.51792	-0.023732	0.543	K2	0.9889	FALSE	exclusion
ENSG00000054967	RELT	29	11:73108518-73108519	+	TE	0.18026	0.20378	-0.023517	0.552	K2	0.9889	FALSE	exclusion
ENSG00000055163	CYFIP2	87	5:156819841-156820215	+	TE	0.17314	0.11568	0.05746	0.647	K3	1.2755	FALSE	inclusion
ENSG00000055163	CYFIP2	88	5:156820216-156820231	+	TE	0.10075	0.11445	-0.013698	0.534	K3	1.2755	FALSE	exclusion
ENSG00000055163	CYFIP2	89	5:156820232-156820232	+	TE	0.10147	0.11103	-0.0095666	0.57	K3	1.2755	FALSE	exclusion
ENSG00000055163	CYFIP2	90	5:156820233-156820237	+	TE	0.10287	0.11089	-0.0080144	0.534	K3	1.2755	FALSE	exclusion
ENSG00000055163	CYFIP2	91	5:156820238-156820241	+	TE	0.10239	0.11848	-0.016085	0.533	K3	1.2755	FALSE	exclusion
ENSG00000055163	CYFIP2	92	5:156820242-156822603	+	TE	0.72003	0.77379	-0.053765	0.59	K3	1.2755	FALSE	exclusion
ENSG00000055163	CYFIP2	93	5:156822604-156822606	+	TE	0.21007	0.23459	-0.024526	0.562	K3	1.2755	FALSE	exclusion
ENSG00000055332	EIF2AK2	28	2:37334489-37334538	-	TE	0.042997	0.055744	-0.012747	0.605	K2	0.0254	FALSE	exclusion
ENSG00000055332	EIF2AK2	29	2:37334416-37334488	-	TE	0.35911	0.054277	0.30483	0.501	K2	0.0254	FALSE	inclusion
ENSG00000055332	EIF2AK2	30	2:37333699-37334415	-	TE	0.04325	0.054749	-0.011499	0.553	K2	0.0254	FALSE	exclusion
ENSG00000055332	EIF2AK2	31	2:37326353-37333698	-	TE	0.64024	0.94526	-0.30502	0.516	K2	0.0254	FALSE	exclusion
ENSG00000056097	ZFR	29	5:32355754-32356045	-	TE	0.11038	0.083988	0.026389	0.584	K3	0.8315	FALSE	inclusion
ENSG00000056097	ZFR	30	5:32354958-32355753	-	TE	0.11125	0.086153	0.025096	0.545	K3	0.8315	FALSE	inclusion
ENSG00000056097	ZFR	31	5:32354735-32354957	-	TE	0.11138	0.081347	0.030035	0.562	K3	0.8315	FALSE	inclusion
ENSG00000056097	ZFR	32	5:32354457-32354734	-	TE	0.68129	0.69916	-0.017863	0.541	K3	0.8315	FALSE	exclusion
ENSG00000056097	ZFR	33	5:32354456-32354456	-	TE	0.31575	0.31536	0.00039072	0.503	K3	0.8315	FALSE	inclusion
ENSG00000056661	NA	20	17:36891365-36891744	-	TE	0.011994	0.013661	-0.0016671	0.5	K2	0	FALSE	exclusion
ENSG00000056661	NA	21	17:36891362-36891364	-	TE	0.011981	0.013722	-0.0017408	0.541	K2	0	FALSE	exclusion
ENSG00000056661	NA	22	17:36891297-36891361	-	TE	0.012404	0.01351	-0.0011055	0.511	K2	0	FALSE	exclusion
ENSG00000056661	NA	23	17:36890533-36891296	-	TE	0.9878	0.98623	0.0015717	0.521	K2	0	FALSE	inclusion
ENSG00000056661	NA	25	17:36890153-36890506	-	TE	0.030567	0.02195	0.0086179	0.562	K2	0.0166	FALSE	inclusion
ENSG00000056661	NA	26	17:36890151-36890152	-	TE	0.96844	0.97647	-0.0080314	0.601	K2	0.0166	FALSE	exclusion
ENSG00000056661	NA	27	17:36890150-36890150	-	TE	0.030895	0.023811	0.0070844	0.557	K2	0.0166	FALSE	inclusion
ENSG00000056736	IL17RB	14	3:53898773-53898918	+	TE	0.16839	0.060527	0.10787	0.807	K2	1.0447	FALSE	inclusion
ENSG00000056736	IL17RB	15	3:53898919-53899615	+	TE	0.061817	0.029469	0.032348	0.704	K2	1.0447	FALSE	inclusion
ENSG00000056736	IL17RB	16	3:53899616-53899827	+	TE	0.77884	0.92673	-0.14788	0.881	K2	1.0447	FALSE	exclusion
ENSG00000056972	TRAF3IP2	13	6:111894098-111894186	-	CE	0.86161	0.88982	-0.028208	0.565	K0	0	FALSE	exclusion
ENSG00000056972	TRAF3IP2	30	6:111880440-111880754	-	TE	0.17747	0.078115	0.099356	0.558	K3	1.48	FALSE	inclusion
ENSG00000056972	TRAF3IP2	31	6:111880222-111880439	-	TE	0.023544	0.053601	-0.030057	0.552	K3	1.48	FALSE	exclusion
ENSG00000056972	TRAF3IP2	32	6:111880189-111880221	-	TE	0.045829	0.020994	0.024834	0.678	K3	1.48	FALSE	inclusion
ENSG00000056972	TRAF3IP2	33	6:111880164-111880188	-	TE	0.023794	0.020218	0.0035762	0.549	K3	1.48	FALSE	inclusion
ENSG00000056972	TRAF3IP2	34	6:111880148-111880163	-	TE	0.022951	0.020935	0.0020161	0.533	K3	1.48	FALSE	inclusion
ENSG00000056972	TRAF3IP2	35	6:111880143-111880147	-	TE	0.36007	0.37281	-0.01274	0.533	K3	1.48	FALSE	exclusion
ENSG00000056972	TRAF3IP2	36	6:111877657-111880142	-	TE	0.46431	0.53695	-0.072646	0.68	K3	1.48	FALSE	exclusion
ENSG00000057019	DCBLD2	34	3:98518680-98518685	-	TE	0.017643	0.031917	-0.014274	0.618	K2	0.9908	FALSE	exclusion
ENSG00000057019	DCBLD2	35	3:98516627-98518679	-	TE	0.017775	0.16019	-0.14241	0.772	K2	0.9908	FALSE	exclusion
ENSG00000057019	DCBLD2	36	3:98514785-98516626	-	TE	0.98188	0.84028	0.1416	0.768	K2	0.9908	FALSE	inclusion
ENSG00000057608	GDI2	23	10:5810176-5810347	-	CE	0.95752	0.95238	0.0051369	0.515	K0	0	FALSE	inclusion
ENSG00000057608	GDI2	24	10:5808457-5808601	-	CE	0.96342	0.9667	-0.003281	0.551	K0	0	FALSE	exclusion
ENSG00000057608	GDI2	25	10:5808259-5808456	-	RI	0.54935	0.25379	0.29556	0.887	K1	0.9992	FALSE	inclusion
ENSG00000057608	GDI2	26	10:5808204-5808258	-	CE	0.9299	0.9373	-0.0074077	0.538	K0	0	FALSE	exclusion
ENSG00000057608	GDI2	27	10:5807917-5808115	-	TE	0.042891	0.25549	-0.2126	0.722	K3	0.997	FALSE	exclusion
ENSG00000057608	GDI2	28	10:5807884-5807916	-	TE	0.13928	0.13025	0.0090287	0.591	K3	0.997	FALSE	inclusion
ENSG00000057608	GDI2	29	10:5807812-5807883	-	TE	0.044822	0.060676	-0.015854	0.569	K3	0.997	FALSE	exclusion
ENSG00000057608	GDI2	30	10:5807192-5807811	-	TE	0.04491	0.12096	-0.076053	0.521	K3	0.997	FALSE	exclusion
ENSG00000057608	GDI2	31	10:5807186-5807191	-	TE	0.86293	0.61724	0.24568	0.649	K3	0.997	FALSE	inclusion
ENSG00000058063	ATP11B	48	3:182635811-182636129	+	TE	0.095568	0.21474	-0.11917	0.561	K2	0.7578	FALSE	exclusion
ENSG00000058063	ATP11B	49	3:182636130-182636851	+	TE	0.094145	0.076821	0.017324	0.569	K2	0.7578	FALSE	inclusion
ENSG00000058063	ATP11B	50	3:182636852-182639423	+	TE	0.90493	0.7829	0.12204	0.591	K2	0.7578	FALSE	inclusion
ENSG00000058262	SEC61A1	24	3:127788319-127788594	+	TE	0.089242	0.051998	0.037244	0.628	K3	1.4679	FALSE	inclusion
ENSG00000058262	SEC61A1	25	3:127788595-127788682	+	TE	0.036909	0.11528	-0.078373	0.625	K3	1.4679	FALSE	exclusion
ENSG00000058262	SEC61A1	26	3:127788683-127790520	+	TE	0.23386	0.56649	-0.33262	0.764	K3	1.4679	FALSE	exclusion
ENSG00000058262	SEC61A1	27	3:127790521-127790525	+	TE	0.44685	0.20916	0.23769	0.742	K3	1.4679	FALSE	inclusion
ENSG00000058262	SEC61A1	28	3:127790526-127790526	+	TE	0.23793	0.1048	0.13313	0.779	K3	1.4679	FALSE	inclusion
ENSG00000058272	PPP1R12A	65	12:80169715-80169795	-	TE	0.12897	0.1244	0.0045644	0.512	K4	0.2414	FALSE	inclusion
ENSG00000058272	PPP1R12A	66	12:80169711-80169714	-	TE	0.12745	0.12089	0.0065581	0.506	K4	0.2414	FALSE	inclusion
ENSG00000058272	PPP1R12A	67	12:80169709-80169710	-	TE	0.12879	0.12052	0.0082769	0.508	K4	0.2414	FALSE	inclusion
ENSG00000058272	PPP1R12A	68	12:80169703-80169708	-	TE	0.12724	0.12305	0.0041897	0.533	K4	0.2414	FALSE	inclusion
ENSG00000058272	PPP1R12A	69	12:80169698-80169702	-	TE	0.13128	0.12418	0.007098	0.526	K4	0.2414	FALSE	inclusion
ENSG00000058272	PPP1R12A	70	12:80169694-80169697	-	TE	0.13016	0.1217	0.008463	0.519	K4	0.2414	FALSE	inclusion
ENSG00000058272	PPP1R12A	71	12:80169321-80169693	-	TE	0.12994	0.12756	0.0023797	0.529	K4	0.2414	FALSE	inclusion
ENSG00000058272	PPP1R12A	72	12:80168186-80169320	-	TE	0.12926	0.12807	0.0011931	0.52	K4	0.2414	FALSE	inclusion
ENSG00000058600	POLR3E	56	16:22343381-22343443	+	AA	0.86592	0.89739	-0.031467	0.59	K0	0	FALSE	exclusion
ENSG00000058600	POLR3E	58	16:22344965-22345017	+	TE	0.027201	0.023435	0.003766	0.504	K3	1.4867	FALSE	inclusion
ENSG00000058600	POLR3E	59	16:22345018-22345256	+	TE	0.026477	0.30618	-0.2797	0.895	K3	1.4867	FALSE	exclusion
ENSG00000058600	POLR3E	60	16:22345257-22345346	+	TE	0.24831	0.13235	0.11596	0.763	K3	1.4867	FALSE	inclusion
ENSG00000058600	POLR3E	61	16:22345347-22345382	+	TE	0.25195	0.074425	0.17752	0.81	K3	1.4867	FALSE	inclusion
ENSG00000058600	POLR3E	62	16:22345383-22345762	+	TE	0.026829	0.024539	0.0022902	0.506	K3	1.4867	FALSE	inclusion
ENSG00000058600	POLR3E	63	16:22345763-22346424	+	TE	0.52598	0.53493	-0.0089492	0.513	K3	1.4867	FALSE	exclusion
ENSG00000059145	UNKL	54	16:1415666-1416018	-	TE	0.26139	0.1195	0.14189	0.743	K2	1	FALSE	inclusion
ENSG00000059145	UNKL	55	16:1415013-1415665	-	TE	0.58823	0.88168	-0.29345	0.676	K2	1	FALSE	exclusion
ENSG00000059145	UNKL	56	16:1415000-1415012	-	TE	0.20351	0.074551	0.12895	0.624	K2	1	FALSE	inclusion
ENSG00000059145	UNKL	58	16:1414175-1414256	-	TE	0.011915	0.011405	0.0005103	0.538	K2	0.6355	FALSE	inclusion
ENSG00000059145	UNKL	59	16:1413207-1414174	-	TE	0.83116	0.83199	-0.00082573	0.515	K2	0.6355	FALSE	exclusion
ENSG00000059145	UNKL	60	16:1413206-1413206	-	TE	0.16782	0.16821	-0.00039436	0.505	K2	0.6355	FALSE	exclusion
ENSG00000059377	TBXAS1	1	7:139476850-139476945	+	TS	0.096744	0.055618	0.041126	0.637	K1	0	FALSE	inclusion
ENSG00000059377	TBXAS1	2	7:139476946-139477040	+	TS	0.89775	0.94526	-0.047514	0.648	K1	0	FALSE	exclusion
ENSG00000059691	GATB	35	4:152592288-152592454	-	TE	0.11878	0.082844	0.035939	0.624	K3	0	FALSE	inclusion
ENSG00000059691	GATB	36	4:152592096-152592287	-	TE	0.11856	0.078727	0.039829	0.612	K3	0	FALSE	inclusion
ENSG00000059691	GATB	37	4:152592040-152592095	-	TE	0.11486	0.079983	0.034879	0.569	K3	0	FALSE	inclusion
ENSG00000059691	GATB	38	4:152592015-152592039	-	TE	0.11789	0.080768	0.037125	0.608	K3	0	FALSE	inclusion
ENSG00000059691	GATB	39	4:152592001-152592014	-	TE	0.11715	0.083509	0.033641	0.625	K3	0	FALSE	inclusion
ENSG00000059691	GATB	40	4:152591990-152592000	-	TE	0.11988	0.081003	0.038881	0.613	K3	0	FALSE	inclusion
ENSG00000059691	GATB	41	4:152591656-152591989	-	TE	0.88398	0.92026	-0.036283	0.614	K3	0	FALSE	exclusion
ENSG00000059915	PSD	22	10:104165294-104165368	-	AA	0.919	0.88342	0.035575	0.605	K0	0	FALSE	inclusion
ENSG00000059915	PSD	30	10:104164485-104164654	-	RI	0.89788	0.91791	-0.020032	0.568	K0	0	FALSE	exclusion
ENSG00000060237	WNK1	68	12:1017641-1017958	+	TE	0.013108	0.014501	-0.0013933	0.518	K2	0	FALSE	exclusion
ENSG00000060237	WNK1	69	12:1017959-1018199	+	TE	0.013337	0.014707	-0.0013701	0.502	K2	0	FALSE	exclusion
ENSG00000060237	WNK1	70	12:1018200-1020466	+	TE	0.013107	0.014355	-0.0012478	0.501	K2	0	FALSE	exclusion
ENSG00000060237	WNK1	71	12:1020467-1020618	+	TE	0.98692	0.98544	0.0014738	0.528	K2	0	FALSE	inclusion
ENSG00000060982	BCAT1	22	12:24970743-24970983	-	TE	0.061399	0.06836	-0.0069606	0.556	K3	0.8223	FALSE	exclusion
ENSG00000060982	BCAT1	23	12:24970590-24970742	-	TE	0.063861	0.33362	-0.26976	0.728	K3	0.8223	FALSE	exclusion
ENSG00000060982	BCAT1	24	12:24970415-24970589	-	TE	0.063401	0.069137	-0.0057354	0.571	K3	0.8223	FALSE	exclusion
ENSG00000060982	BCAT1	25	12:24967755-24970414	-	TE	0.0619	0.067802	-0.0059016	0.561	K3	0.8223	FALSE	exclusion
ENSG00000060982	BCAT1	26	12:24967737-24967754	-	TE	0.06368	0.0679	-0.0042203	0.581	K3	0.8223	FALSE	exclusion
ENSG00000060982	BCAT1	27	12:24964295-24967736	-	TE	0.93571	0.66478	0.27093	0.772	K3	0.8223	FALSE	inclusion
ENSG00000061273	HDAC7	87	12:48177624-48177669	-	TE	0.081265	0.056652	0.024614	0.634	K4	1.4266	FALSE	inclusion
ENSG00000061273	HDAC7	88	12:48177583-48177623	-	TE	0.080376	0.49403	-0.41365	0.684	K4	1.4266	FALSE	exclusion
ENSG00000061273	HDAC7	89	12:48177504-48177582	-	TE	0.080017	0.056212	0.023805	0.617	K4	1.4266	FALSE	inclusion
ENSG00000061273	HDAC7	90	12:48177457-48177503	-	TE	0.078418	0.057454	0.020964	0.594	K4	1.4266	FALSE	inclusion
ENSG00000061273	HDAC7	91	12:48177434-48177456	-	TE	0.078949	0.057899	0.02105	0.59	K4	1.4266	FALSE	inclusion
ENSG00000061273	HDAC7	93	12:48177299-48177420	-	TE	0.15141	0.057777	0.093637	0.79	K4	1.4266	FALSE	inclusion
ENSG00000061273	HDAC7	94	12:48176509-48177298	-	TE	0.27898	0.13682	0.14216	0.785	K4	1.4266	FALSE	inclusion
ENSG00000061273	HDAC7	95	12:48176505-48176508	-	TE	0.08169	0.28359	-0.2019	0.555	K4	1.4266	FALSE	exclusion
ENSG00000061656	SPAG4	2	20:34204802-34204945	+	TS	0.11109	0.082917	0.028177	0.571	K2	0.1266	FALSE	inclusion
ENSG00000061656	SPAG4	3	20:34204946-34204967	+	TS	0.8778	0.90573	-0.02792	0.562	K2	0.1266	FALSE	exclusion
ENSG00000061656	SPAG4	4	20:34204968-34205057	+	TS	0.12109	0.093807	0.027286	0.592	K2	0.1266	FALSE	inclusion
ENSG00000061656	SPAG4	5	20:34205058-34205162	+	CE	0.87487	0.90832	-0.033456	0.611	K0	0	FALSE	exclusion
ENSG00000061656	SPAG4	6	20:34205442-34205508	+	CE	0.85631	0.91376	-0.05745	0.625	K0	0	FALSE	exclusion
ENSG00000061656	SPAG4	12	20:34206398-34206533	+	RI	0.88817	0.90331	-0.015135	0.558	K0	0	FALSE	exclusion
ENSG00000061656	SPAG4	13	20:34206534-34206642	+	CE	0.90959	0.90689	0.0027038	0.51	K0	0	FALSE	inclusion
ENSG00000061656	SPAG4	14	20:34206643-34206690	+	RI	0.88092	0.93293	-0.052005	0.68	K0	0	FALSE	exclusion
ENSG00000061656	SPAG4	25	20:34208798-34208856	+	TE	0.093205	0.12353	-0.030324	0.55	K1	0	FALSE	exclusion
ENSG00000061656	SPAG4	26	20:34208857-34208971	+	TE	0.90563	0.88073	0.024896	0.565	K1	0	FALSE	inclusion
ENSG00000062598	ELMO2	53	20:44997608-44999081	-	RI	0.86333	0.90915	-0.045825	0.637	K0	0	FALSE	exclusion
ENSG00000062598	ELMO2	54	20:44997530-44997607	-	CE	0.86529	0.8968	-0.031507	0.598	K0	0	FALSE	exclusion
ENSG00000062598	ELMO2	55	20:44995999-44996199	-	TE	0.27504	0.13612	0.13892	0.726	K3	1.8773	FALSE	inclusion
ENSG00000062598	ELMO2	56	20:44995850-44995998	-	TE	0.061875	0.084679	-0.022804	0.561	K3	1.8773	FALSE	exclusion
ENSG00000062598	ELMO2	57	20:44995800-44995849	-	TE	0.17071	0.17889	-0.0081841	0.548	K3	1.8773	FALSE	exclusion
ENSG00000062598	ELMO2	58	20:44995767-44995799	-	TE	0.06212	0.14764	-0.085522	0.611	K3	1.8773	FALSE	exclusion
ENSG00000062598	ELMO2	59	20:44994694-44995766	-	TE	0.47508	0.54685	-0.071772	0.597	K3	1.8773	FALSE	exclusion
ENSG00000062598	ELMO2	60	20:44994693-44994693	-	TE	0.20258	0.23835	-0.035773	0.538	K3	1.8773	FALSE	exclusion
ENSG00000062598	ELMO2	61	20:44994689-44994692	-	TE	0.063184	0.083643	-0.020459	0.569	K3	1.8773	FALSE	exclusion
ENSG00000062598	ELMO2	62	20:44994688-44994688	-	TE	0.06502	0.083768	-0.018748	0.558	K3	1.8773	FALSE	exclusion
ENSG00000062716	VMP1	44	17:57917129-57917364	+	TE	0.085185	0.1154	-0.03021	0.599	K4	1.9137	FALSE	exclusion
ENSG00000062716	VMP1	45	17:57917365-57917385	+	TE	0.09191	0.11638	-0.024468	0.565	K4	1.9137	FALSE	exclusion
ENSG00000062716	VMP1	46	17:57917386-57917467	+	TE	0.087347	0.11537	-0.028023	0.582	K4	1.9137	FALSE	exclusion
ENSG00000062716	VMP1	47	17:57917468-57917492	+	TE	0.088999	0.11493	-0.02593	0.56	K4	1.9137	FALSE	exclusion
ENSG00000062716	VMP1	48	17:57917493-57917524	+	TE	0.088878	0.11722	-0.028339	0.578	K4	1.9137	FALSE	exclusion
ENSG00000062716	VMP1	49	17:57917525-57917532	+	TE	0.08855	0.11502	-0.02647	0.563	K4	1.9137	FALSE	exclusion
ENSG00000062716	VMP1	51	17:57917569-57917584	+	TE	0.089317	0.16979	-0.08047	0.657	K4	1.9137	FALSE	exclusion
ENSG00000062716	VMP1	52	17:57917585-57917676	+	TE	0.089214	0.17154	-0.082328	0.658	K4	1.9137	FALSE	exclusion
ENSG00000062716	VMP1	53	17:57917677-57918453	+	TE	0.092051	0.20871	-0.11666	0.729	K4	1.9137	FALSE	exclusion
ENSG00000062716	VMP1	54	17:57918454-57919616	+	TE	0.16499	0.68571	-0.52072	0.898	K4	1.9137	FALSE	exclusion
ENSG00000063015	SEZ6	15	17:27287523-27287631	-	AD	0.91471	0.89133	0.023381	0.563	K0	0	FALSE	inclusion
ENSG00000063015	SEZ6	34	17:27282866-27282996	-	AA	0.86119	0.88143	-0.020243	0.562	K0	0	FALSE	exclusion
ENSG00000063015	SEZ6	35	17:27282149-27282865	-	TE	0.22874	0.32708	-0.098344	0.651	K2	1.3427	FALSE	exclusion
ENSG00000063015	SEZ6	36	17:27281924-27282148	-	TE	0.66881	0.58589	0.08292	0.616	K2	1.3427	FALSE	inclusion
ENSG00000063015	SEZ6	37	17:27281923-27281923	-	TE	0.15735	0.15073	0.0066219	0.549	K2	1.3427	FALSE	inclusion
ENSG00000063015	SEZ6	38	17:27281919-27281922	-	TE	0.054684	0.062868	-0.0081843	0.507	K2	1.3427	FALSE	exclusion
ENSG00000063046	EIF4B	40	12:53432196-53433021	+	RI	0.67586	0.61857	0.057287	0.592	K1	0.991	FALSE	inclusion
ENSG00000063046	EIF4B	41	12:53433022-53433127	+	CE	0.90639	0.89757	0.0088166	0.522	K0	0	FALSE	inclusion
ENSG00000063046	EIF4B	43	12:53433927-53434064	+	TE	0.060807	0.49961	-0.4388	0.873	K2	1.2196	FALSE	exclusion
ENSG00000063046	EIF4B	44	12:53434065-53434136	+	TE	0.061943	0.09684	-0.034897	0.625	K2	1.2196	FALSE	exclusion
ENSG00000063046	EIF4B	45	12:53434137-53434246	+	TE	0.060985	0.067011	-0.0060262	0.523	K2	1.2196	FALSE	exclusion
ENSG00000063046	EIF4B	46	12:53434247-53435993	+	TE	0.93912	0.4719	0.46722	0.876	K2	1.2196	FALSE	inclusion
ENSG00000063244	U2AF2	1	19:56165512-56166430	+	TS	0.054001	0.078968	-0.024967	0.59	K2	0	FALSE	exclusion
ENSG00000063244	U2AF2	2	19:56166431-56166447	+	TS	0.056496	0.081429	-0.024933	0.57	K2	0	FALSE	exclusion
ENSG00000063244	U2AF2	3	19:56166448-56166474	+	TS	0.057011	0.080712	-0.0237	0.587	K2	0	FALSE	exclusion
ENSG00000063244	U2AF2	4	19:56166475-56166519	+	TS	0.9433	0.92004	0.023255	0.584	K2	0	FALSE	inclusion
ENSG00000063322	MED29	12	19:39888167-39888338	+	TE	0.31508	0.089816	0.22526	0.601	K3	1.2914	FALSE	inclusion
ENSG00000063322	MED29	13	19:39888339-39889247	+	TE	0.22171	0.1715	0.050209	0.615	K3	1.2914	FALSE	inclusion
ENSG00000063322	MED29	14	19:39889248-39890199	+	TE	0.24733	0.090798	0.15654	0.685	K3	1.2914	FALSE	inclusion
ENSG00000063322	MED29	15	19:39890200-39890616	+	TE	0.0782	0.090091	-0.011891	0.55	K3	1.2914	FALSE	exclusion
ENSG00000063438	AHRR	27	5:433968-434524	+	TE	0.20729	0.17866	0.028632	0.539	K3	1.0097	FALSE	inclusion
ENSG00000063438	AHRR	28	5:434525-434972	+	TE	0.078332	0.42946	-0.35113	0.811	K3	1.0097	FALSE	exclusion
ENSG00000063438	AHRR	29	5:434973-435008	+	TE	0.22936	0.073186	0.15617	0.696	K3	1.0097	FALSE	inclusion
ENSG00000063438	AHRR	30	5:435009-435224	+	TE	0.081632	0.074091	0.0075409	0.514	K3	1.0097	FALSE	inclusion
ENSG00000063438	AHRR	31	5:435225-435225	+	TE	0.081146	0.072226	0.00892	0.535	K3	1.0097	FALSE	inclusion
ENSG00000063438	AHRR	32	5:435226-438406	+	TE	0.65032	0.46945	0.18088	0.707	K3	1.0097	FALSE	inclusion
ENSG00000063660	GPC1	27	2:241405863-241406210	+	TE	0.096532	0.087027	0.0095057	0.55	K1	0	FALSE	inclusion
ENSG00000063660	GPC1	28	2:241406211-241407493	+	TE	0.90152	0.91291	-0.011393	0.569	K1	0	FALSE	exclusion
ENSG00000063854	HAGH	31	16:1859125-1859238	-	TE	0.095808	0.11504	-0.019231	0.54	K3	0.6803	FALSE	exclusion
ENSG00000063854	HAGH	32	16:1859106-1859124	-	TE	0.096362	0.10922	-0.012857	0.512	K3	0.6803	FALSE	exclusion
ENSG00000063854	HAGH	33	16:1859104-1859105	-	TE	0.86817	0.78611	0.082064	0.692	K3	0.6803	FALSE	inclusion
ENSG00000063854	HAGH	34	16:1858874-1859103	-	TE	0.12825	0.21248	-0.084234	0.725	K3	0.6803	FALSE	exclusion
ENSG00000063854	HAGH	35	16:1858873-1858873	-	TE	0.09629	0.10942	-0.013133	0.578	K3	0.6803	FALSE	exclusion
ENSG00000064225	ST3GAL6	1	3:98451080-98451098	+	TS	0.09814	0.10481	-0.0066753	0.526	K3	0.3337	FALSE	exclusion
ENSG00000064225	ST3GAL6	2	3:98451099-98451108	+	TS	0.47309	0.50221	-0.029125	0.539	K3	0.3337	FALSE	exclusion
ENSG00000064225	ST3GAL6	3	3:98451109-98451109	+	TS	0.098144	0.1072	-0.0090562	0.502	K3	0.3337	FALSE	exclusion
ENSG00000064225	ST3GAL6	4	3:98451110-98451212	+	TS	0.11763	0.11952	-0.0018974	0.509	K3	0.3337	FALSE	exclusion
ENSG00000064225	ST3GAL6	5	3:98451213-98451222	+	TS	0.10765	0.10536	0.0022898	0.522	K3	0.3337	FALSE	inclusion
ENSG00000064225	ST3GAL6	6	3:98451223-98451293	+	TS	0.10379	0.10236	0.0014339	0.514	K3	0.3337	FALSE	inclusion
ENSG00000064225	ST3GAL6	7	3:98451294-98451318	+	TS	0.099902	0.10636	-0.0064549	0.524	K3	0.3337	FALSE	exclusion
ENSG00000064225	ST3GAL6	8	3:98451319-98451376	+	TS	0.50286	0.48877	0.014085	0.527	K3	0.3337	FALSE	inclusion
ENSG00000064225	ST3GAL6	57	3:98512637-98512788	+	TE	0.0070521	0.0069287	0.00012344	0.504	K3	0.3345	FALSE	inclusion
ENSG00000064225	ST3GAL6	58	3:98512789-98513206	+	TE	0.0073001	0.0066158	0.00068434	0.513	K3	0.3345	FALSE	inclusion
ENSG00000064225	ST3GAL6	59	3:98513207-98513234	+	TE	0.0071891	0.0069755	0.00021354	0.524	K3	0.3345	FALSE	inclusion
ENSG00000064225	ST3GAL6	60	3:98513235-98513237	+	TE	0.0069706	0.016927	-0.0099563	0.542	K3	0.3345	FALSE	exclusion
ENSG00000064225	ST3GAL6	61	3:98513238-98514098	+	TE	0.0072104	0.0069923	0.00021811	0.505	K3	0.3345	FALSE	inclusion
ENSG00000064225	ST3GAL6	62	3:98514099-98514689	+	TE	0.99263	0.98313	0.0094934	0.596	K3	0.3345	FALSE	inclusion
ENSG00000064225	ST3GAL6	64	3:98520266-98520299	+	CE	0.96694	0.97671	-0.0097615	0.568	K0	0	FALSE	exclusion
ENSG00000064225	ST3GAL6	65	3:98520300-98520392	+	RI	0.9756	0.9803	-0.0046988	0.527	K0	0	FALSE	exclusion
ENSG00000064225	ST3GAL6	66	3:98520393-98520461	+	CE	0.96829	0.9735	-0.0052111	0.511	K0	0	FALSE	exclusion
ENSG00000064225	ST3GAL6	67	3:98539632-98539841	+	TE	0.284	0.3718	-0.087802	0.648	K1	0.9997	FALSE	exclusion
ENSG00000064225	ST3GAL6	68	3:98539842-98540045	+	TE	0.71392	0.62938	0.084533	0.65	K1	0.9997	FALSE	inclusion
ENSG00000064270	ATP2C2	44	16:84494300-84494368	+	TS	0.10976	0.090677	0.019084	0.545	K1	0	FALSE	inclusion
ENSG00000064270	ATP2C2	45	16:84494369-84494407	+	TS	0.89185	0.91262	-0.020776	0.574	K1	0	FALSE	exclusion
ENSG00000064270	ATP2C2	47	16:84495320-84495418	+	CE	0.94947	0.94803	0.0014325	0.516	K0	0	FALSE	inclusion
ENSG00000064270	ATP2C2	48	16:84495419-84495593	+	RI	0.97239	0.96827	0.0041209	0.554	K0	0	FALSE	inclusion
ENSG00000064270	ATP2C2	51	16:84497220-84497336	+	TE	0.32563	0.55671	-0.23108	0.676	K3	1.1717	FALSE	exclusion
ENSG00000064270	ATP2C2	52	16:84497337-84497606	+	TE	0.12894	0.18644	-0.057496	0.506	K3	1.1717	FALSE	exclusion
ENSG00000064270	ATP2C2	53	16:84497607-84497784	+	TE	0.25418	0.24034	0.013839	0.567	K3	1.1717	FALSE	inclusion
ENSG00000064270	ATP2C2	54	16:84497785-84497785	+	TE	0.085555	0.035107	0.050449	0.682	K3	1.1717	FALSE	inclusion
ENSG00000064270	ATP2C2	55	16:84497786-84497793	+	TE	0.27118	0.055821	0.21536	0.538	K3	1.1717	FALSE	inclusion
ENSG00000064490	RFXANK	1	19:19303008-19303037	+	TS	0.14384	0.39126	-0.24742	0.836	K3	0.9874	FALSE	exclusion
ENSG00000064490	RFXANK	2	19:19303038-19303038	+	TS	0.86152	0.61049	0.25104	0.852	K3	0.9874	FALSE	inclusion
ENSG00000064490	RFXANK	3	19:19303039-19303051	+	TS	0.13833	0.089481	0.048854	0.617	K3	0.9874	FALSE	inclusion
ENSG00000064490	RFXANK	4	19:19303052-19303082	+	TS	0.13693	0.092499	0.044433	0.599	K3	0.9874	FALSE	inclusion
ENSG00000064490	RFXANK	5	19:19303083-19303363	+	TS	0.14245	0.090143	0.052309	0.606	K3	0.9874	FALSE	inclusion
ENSG00000064490	RFXANK	35	19:19311628-19311702	+	CE	0.92084	0.86839	0.052457	0.634	K0	0	FALSE	inclusion
ENSG00000064490	RFXANK	36	19:19312458-19312465	+	AA	0.96535	0.95754	0.0078113	0.554	K0	0	FALSE	inclusion
ENSG00000064490	RFXANK	37	19:19312466-19312611	+	TE	0.10473	0.062548	0.042182	0.762	K2	1.8328	FALSE	inclusion
ENSG00000064490	RFXANK	38	19:19312612-19312672	+	TE	0.057268	0.020576	0.036693	0.698	K2	1.8328	FALSE	inclusion
ENSG00000064490	RFXANK	39	19:19312673-19312675	+	TE	0.12321	0.01914	0.10407	0.742	K2	1.8328	FALSE	inclusion
ENSG00000064490	RFXANK	40	19:19312676-19312678	+	TE	0.74798	0.92749	-0.17951	0.752	K2	1.8328	FALSE	exclusion
ENSG00000064601	CTSA	1	20:44518783-44519682	+	TS	0.011139	0.01221	-0.001071	0.503	K4	2.2078	FALSE	exclusion
ENSG00000064601	CTSA	2	20:44519683-44519951	+	TS	0.011637	0.012159	-0.00052238	0.521	K4	2.2078	FALSE	exclusion
ENSG00000064601	CTSA	3	20:44519952-44519960	+	TS	0.011318	0.011737	-0.00041843	0.525	K4	2.2078	FALSE	exclusion
ENSG00000064601	CTSA	4	20:44519961-44519973	+	TS	0.089212	0.012156	0.077056	0.791	K4	2.2078	FALSE	inclusion
ENSG00000064601	CTSA	5	20:44519974-44519979	+	TS	0.088754	0.012548	0.076205	0.771	K4	2.2078	FALSE	inclusion
ENSG00000064601	CTSA	6	20:44519980-44519993	+	TS	0.08922	0.012283	0.076937	0.788	K4	2.2078	FALSE	inclusion
ENSG00000064601	CTSA	7	20:44519994-44519995	+	TS	0.089065	0.49326	-0.4042	0.577	K4	2.2078	FALSE	exclusion
ENSG00000064601	CTSA	8	20:44519996-44520014	+	TS	0.011771	0.012407	-0.00063665	0.517	K4	2.2078	FALSE	exclusion
ENSG00000064601	CTSA	9	20:44520015-44520018	+	TS	0.67976	0.50695	0.17281	0.585	K4	2.2078	FALSE	inclusion
ENSG00000064601	CTSA	44	20:44525604-44525679	+	CE	0.91644	0.89323	0.023214	0.556	K0	0	FALSE	inclusion
ENSG00000064601	CTSA	47	20:44526356-44526422	+	TE	0.1134	0.11251	0.00089541	0.513	K1	0	FALSE	inclusion
ENSG00000064601	CTSA	48	20:44526423-44526433	+	TE	0.88865	0.88906	-0.00040778	0.524	K1	0	FALSE	exclusion
ENSG00000064601	CTSA	50	20:44526446-44526546	+	RI	0.93182	0.91929	0.012526	0.532	K0	0	FALSE	inclusion
ENSG00000064601	CTSA	51	20:44526547-44526643	+	AA	0.9192	0.94719	-0.027983	0.591	K0	0	FALSE	exclusion
ENSG00000064601	CTSA	52	20:44526644-44526748	+	CE	0.89562	0.91091	-0.015287	0.578	K0	0	FALSE	exclusion
ENSG00000064601	CTSA	53	20:44527006-44527266	+	TE	0.050494	0.10183	-0.051338	0.528	K2	0.9879	FALSE	exclusion
ENSG00000064601	CTSA	54	20:44527267-44527425	+	TE	0.050388	0.03746	0.012928	0.576	K2	0.9879	FALSE	inclusion
ENSG00000064601	CTSA	55	20:44527426-44527459	+	TE	0.95055	0.89705	0.053498	0.525	K2	0.9879	FALSE	inclusion
ENSG00000064607	SUGP2	1	19:19144626-19144832	-	TS	0.017798	0.026896	-0.0090986	0.553	K1	0	FALSE	exclusion
ENSG00000064607	SUGP2	2	19:19144571-19144625	-	TS	0.98183	0.97206	0.0097691	0.578	K1	0	FALSE	inclusion
ENSG00000064726	BTBD1	16	15:83686713-83686977	-	TE	0.25787	0.16149	0.096384	0.559	K1	0.9692	FALSE	inclusion
ENSG00000064726	BTBD1	17	15:83685174-83686712	-	TE	0.74472	0.83817	-0.093448	0.561	K1	0.9692	FALSE	exclusion
ENSG00000064763	FAR2	27	12:29486565-29486667	+	CE	0.96459	0.96806	-0.003469	0.552	K0	0	FALSE	exclusion
ENSG00000064763	FAR2	28	12:29486668-29487005	+	TE	0.0028574	0.0032247	-0.00036727	0.521	K2	0	FALSE	exclusion
ENSG00000064763	FAR2	29	12:29487006-29487006	+	TE	0.0027942	0.0033852	-0.00059107	0.56	K2	0	FALSE	exclusion
ENSG00000064763	FAR2	30	12:29487007-29488549	+	TE	0.99721	0.99658	0.00062648	0.552	K2	0	FALSE	inclusion
ENSG00000064932	SBNO2	50	19:1108564-1108703	-	TE	0.45985	0.075848	0.384	0.74	K2	0.6425	FALSE	inclusion
ENSG00000064932	SBNO2	51	19:1107641-1108563	-	TE	0.46514	0.79192	-0.32678	0.759	K2	0.6425	FALSE	exclusion
ENSG00000064932	SBNO2	52	19:1107640-1107640	-	TE	0.16367	0.20824	-0.04457	0.662	K2	0.6425	FALSE	exclusion
ENSG00000064932	SBNO2	53	19:1107636-1107639	-	TE	0.093369	0.074156	0.019213	0.549	K2	0.6425	FALSE	inclusion
ENSG00000065029	ZNF76	1	6:35226686-35226758	+	TS	0.33813	0.34042	-0.0022961	0.522	K1	0.9956	FALSE	exclusion
ENSG00000065029	ZNF76	2	6:35226759-35227163	+	TS	0.66238	0.65716	0.0052198	0.51	K1	0.9956	FALSE	inclusion
ENSG00000065361	ERBB3	74	12:56495313-56495876	+	TE	0.20741	0.1361	0.071303	0.6	K3	1.9828	FALSE	inclusion
ENSG00000065361	ERBB3	75	12:56495877-56496120	+	TE	0.19243	0.093092	0.099335	0.7	K3	1.9828	FALSE	inclusion
ENSG00000065361	ERBB3	76	12:56496121-56496158	+	TE	0.11615	0.22803	-0.11188	0.523	K3	1.9828	FALSE	exclusion
ENSG00000065361	ERBB3	78	12:56496591-56496618	+	TE	0.11893	0.11447	0.0044667	0.513	K3	1.9828	FALSE	inclusion
ENSG00000065361	ERBB3	79	12:56496619-56497283	+	TE	0.32473	0.52513	-0.2004	0.65	K3	1.9828	FALSE	exclusion
ENSG00000065361	ERBB3	80	12:56497284-56497289	+	TE	0.11577	0.27521	-0.15944	0.584	K3	1.9828	FALSE	exclusion
ENSG00000065526	SPEN	21	1:16265791-16266039	+	TE	0.38893	0.36485	0.024078	0.57	K1	0.9999	FALSE	inclusion
ENSG00000065526	SPEN	22	1:16266040-16266955	+	TE	0.61285	0.63452	-0.021664	0.589	K1	0.9999	FALSE	exclusion
ENSG00000065534	MYLK	53	3:123342926-123344163	-	TS	0.013658	0.0092436	0.0044139	0.59	K2	0.9485	FALSE	inclusion
ENSG00000065534	MYLK	54	3:123339474-123342925	-	TS	0.63733	0.75841	-0.12108	0.52	K2	0.9485	FALSE	exclusion
ENSG00000065534	MYLK	55	3:123339362-123339473	-	TS	0.1358	0.093283	0.042518	0.514	K2	0.9485	FALSE	inclusion
ENSG00000065534	MYLK	56	3:123339344-123339361	-	TS	0.24122	0.15775	0.083473	0.598	K2	0.9485	FALSE	inclusion
ENSG00000065534	MYLK	57	3:123339184-123339343	-	RI	0.88736	0.89768	-0.010318	0.503	K0	0	FALSE	exclusion
ENSG00000065534	MYLK	62	3:123332952-123333196	-	TE	0.0086442	0.0060288	0.0026154	0.591	K3	1.6871	FALSE	inclusion
ENSG00000065534	MYLK	63	3:123332911-123332951	-	TE	0.0084933	0.049884	-0.041391	0.516	K3	1.6871	FALSE	exclusion
ENSG00000065534	MYLK	64	3:123332892-123332910	-	TE	0.0086714	0.0058644	0.002807	0.583	K3	1.6871	FALSE	inclusion
ENSG00000065534	MYLK	65	3:123332876-123332891	-	TE	0.0086258	0.018868	-0.010242	0.635	K3	1.6871	FALSE	exclusion
ENSG00000065534	MYLK	66	3:123332187-123332875	-	TE	0.0085525	0.048642	-0.04009	0.536	K3	1.6871	FALSE	exclusion
ENSG00000065534	MYLK	67	3:123331157-123332186	-	TE	0.0087453	0.0060022	0.0027431	0.591	K3	1.6871	FALSE	inclusion
ENSG00000065534	MYLK	68	3:123331145-123331156	-	TE	0.30454	0.2627	0.041831	0.589	K3	1.6871	FALSE	inclusion
ENSG00000065534	MYLK	69	3:123328896-123331144	-	TE	0.69366	0.63775	0.055912	0.612	K3	1.6871	FALSE	inclusion
ENSG00000065600	PACC1	15	1:212537824-212538718	-	TE	0.12749	0.1127	0.014798	0.556	K1	0	FALSE	inclusion
ENSG00000065600	PACC1	16	1:212537273-212537823	-	TE	0.8727	0.89444	-0.021734	0.56	K1	0	FALSE	exclusion
ENSG00000065618	COL17A1	67	10:105791352-105791961	-	RI	0.89625	0.92495	-0.028705	0.603	K0	0	FALSE	exclusion
ENSG00000065618	COL17A1	68	10:105791046-105791351	-	TE	0.91585	0.38011	0.53574	0.858	K1	0	FALSE	inclusion
ENSG00000065618	COL17A1	69	10:105791044-105791045	-	TE	0.081925	0.6216	-0.53967	0.844	K1	0	FALSE	exclusion
ENSG00000065621	GSTO2	21	10:106058886-106059169	+	TE	0.25441	0.067209	0.18721	0.727	K3	0.973	FALSE	inclusion
ENSG00000065621	GSTO2	22	10:106059170-106059172	+	TE	0.02635	0.033049	-0.0066989	0.552	K3	0.973	FALSE	exclusion
ENSG00000065621	GSTO2	23	10:106059173-106059175	+	TE	0.02695	0.032834	-0.0058842	0.573	K3	0.973	FALSE	exclusion
ENSG00000065621	GSTO2	24	10:106059176-106059176	+	TE	0.02673	0.033364	-0.0066342	0.536	K3	0.973	FALSE	exclusion
ENSG00000065621	GSTO2	25	10:106059177-106059616	+	TE	0.06634	0.033424	0.032916	0.705	K3	0.973	FALSE	inclusion
ENSG00000065621	GSTO2	26	10:106059617-106064703	+	TE	0.70426	0.93241	-0.22815	0.818	K3	0.973	FALSE	exclusion
ENSG00000065665	SEC61A2	32	10:12206267-12206546	+	TE	0.057149	0.083299	-0.02615	0.588	K2	0.984	FALSE	exclusion
ENSG00000065665	SEC61A2	33	10:12206547-12206826	+	TE	0.26239	0.058949	0.20344	0.877	K2	0.984	FALSE	inclusion
ENSG00000065665	SEC61A2	34	10:12206827-12207403	+	TE	0.27675	0.057162	0.21959	0.649	K2	0.984	FALSE	inclusion
ENSG00000065665	SEC61A2	35	10:12207404-12207411	+	TE	0.51638	0.91724	-0.40087	0.808	K2	0.984	FALSE	exclusion
ENSG00000065665	SEC61A2	37	10:12211257-12211955	+	TE	0.013819	0.0094746	0.0043445	0.575	K1	0.0258	FALSE	inclusion
ENSG00000065665	SEC61A2	38	10:12211956-12211960	+	TE	0.98616	0.99012	-0.003967	0.563	K1	0.0258	FALSE	exclusion
ENSG00000065883	CDK13	1	7:39989636-39990108	+	TS	0.10649	0.13426	-0.027772	0.562	K1	0	FALSE	exclusion
ENSG00000065883	CDK13	2	7:39990109-39991451	+	TS	0.89694	0.86528	0.031653	0.59	K1	0	FALSE	inclusion
ENSG00000065883	CDK13	18	7:40132384-40132563	+	AA	0.90728	0.86388	0.043395	0.605	K0	0	FALSE	inclusion
ENSG00000065883	CDK13	21	7:40133729-40135131	+	TE	0.28519	0.32449	-0.039293	0.522	K2	0.9965	FALSE	exclusion
ENSG00000065883	CDK13	22	7:40135132-40135154	+	TE	0.11988	0.21962	-0.09974	0.583	K2	0.9965	FALSE	exclusion
ENSG00000065883	CDK13	23	7:40135155-40136733	+	TE	0.60816	0.49094	0.11721	0.714	K2	0.9965	FALSE	inclusion
ENSG00000065923	SLC9A7	24	X:46465730-46465805	-	TE	0.11206	0.088247	0.023816	0.568	K2	0.0747	FALSE	inclusion
ENSG00000065923	SLC9A7	25	X:46465696-46465729	-	TE	0.37303	0.63045	-0.25741	0.708	K2	0.0747	FALSE	exclusion
ENSG00000065923	SLC9A7	26	X:46464753-46465695	-	TE	0.62615	0.36912	0.25704	0.663	K2	0.0747	FALSE	inclusion
ENSG00000065970	FOXJ2	1	12:8185299-8185955	+	TS	0.11978	0.092664	0.027114	0.582	K1	0	FALSE	inclusion
ENSG00000065970	FOXJ2	2	12:8185956-8186429	+	TS	0.88172	0.90498	-0.023254	0.546	K1	0	FALSE	exclusion
ENSG00000066027	PPP2R5A	20	1:212533980-212534264	+	TE	0.049515	0.071419	-0.021904	0.583	K1	0.5189	FALSE	exclusion
ENSG00000066027	PPP2R5A	21	1:212534265-212535200	+	TE	0.95272	0.92894	0.023776	0.619	K1	0.5189	FALSE	inclusion
ENSG00000066117	SMARCD1	1	12:50478755-50478982	+	TS	0.13287	0.11463	0.018242	0.542	K3	0	FALSE	inclusion
ENSG00000066117	SMARCD1	2	12:50478983-50479107	+	TS	0.13337	0.11982	0.013552	0.532	K3	0	FALSE	inclusion
ENSG00000066117	SMARCD1	3	12:50479108-50479110	+	TS	0.13551	0.11926	0.016248	0.534	K3	0	FALSE	inclusion
ENSG00000066117	SMARCD1	4	12:50479111-50479124	+	TS	0.13612	0.12406	0.012064	0.528	K3	0	FALSE	inclusion
ENSG00000066117	SMARCD1	5	12:50479125-50479135	+	TS	0.1395	0.12005	0.019451	0.566	K3	0	FALSE	inclusion
ENSG00000066117	SMARCD1	6	12:50479136-50479329	+	TS	0.86916	0.87913	-0.0099641	0.522	K3	0	FALSE	exclusion
ENSG00000066135	KDM4A	21	1:44156516-44156720	+	CE	0.91623	0.92324	-0.0070036	0.539	K0	0	FALSE	exclusion
ENSG00000066136	NFYC	1	1:41157320-41157357	+	TS	0.14743	0.09332	0.054109	0.636	K3	0.54	FALSE	inclusion
ENSG00000066136	NFYC	2	1:41157358-41157360	+	TS	0.79041	0.85526	-0.064846	0.645	K3	0.54	FALSE	exclusion
ENSG00000066136	NFYC	3	1:41157361-41157380	+	TS	0.14563	0.091389	0.054241	0.641	K3	0.54	FALSE	inclusion
ENSG00000066136	NFYC	4	1:41157381-41157387	+	TS	0.14437	0.093022	0.051351	0.646	K3	0.54	FALSE	inclusion
ENSG00000066136	NFYC	5	1:41157388-41157388	+	TS	0.14329	0.1085	0.034795	0.594	K3	0.54	FALSE	inclusion
ENSG00000066136	NFYC	6	1:41157389-41157414	+	TS	0.14388	0.099744	0.044137	0.595	K3	0.54	FALSE	inclusion
ENSG00000066136	NFYC	7	1:41157415-41157509	+	TS	0.1867	0.11337	0.073335	0.681	K3	0.54	FALSE	inclusion
ENSG00000066136	NFYC	8	1:41157510-41157539	+	TS	0.16723	0.10066	0.066568	0.654	K3	0.54	FALSE	inclusion
ENSG00000066230	SLC9A3	13	5:479951-480080	-	CE	0.97886	0.97104	0.0078176	0.595	K0	0	FALSE	inclusion
ENSG00000066248	NGEF	30	2:233744085-233744389	-	TE	0.10121	0.10351	-0.0022918	0.514	K2	0	FALSE	exclusion
ENSG00000066248	NGEF	31	2:233743925-233744084	-	TE	0.099164	0.10065	-0.0014832	0.507	K2	0	FALSE	exclusion
ENSG00000066248	NGEF	32	2:233743396-233743924	-	TE	0.89615	0.8958	0.00034546	0.529	K2	0	FALSE	inclusion
ENSG00000066322	ELOVL1	33	1:43829721-43829808	-	TE	0.049342	0.058048	-0.0087063	0.571	K4	0.8424	FALSE	exclusion
ENSG00000066322	ELOVL1	34	1:43829686-43829720	-	TE	0.49375	0.8907	-0.39695	0.662	K4	0.8424	FALSE	exclusion
ENSG00000066322	ELOVL1	35	1:43829665-43829685	-	TE	0.064113	0.081531	-0.017418	0.558	K4	0.8424	FALSE	exclusion
ENSG00000066322	ELOVL1	36	1:43829546-43829664	-	TE	0.049826	0.059195	-0.0093686	0.573	K4	0.8424	FALSE	exclusion
ENSG00000066322	ELOVL1	37	1:43829507-43829545	-	TE	0.050987	0.061268	-0.01028	0.564	K4	0.8424	FALSE	exclusion
ENSG00000066322	ELOVL1	38	1:43829442-43829506	-	TE	0.048747	0.063862	-0.015115	0.619	K4	0.8424	FALSE	exclusion
ENSG00000066322	ELOVL1	39	1:43829427-43829441	-	TE	0.36277	0.060048	0.30272	0.731	K4	0.8424	FALSE	inclusion
ENSG00000066322	ELOVL1	40	1:43829399-43829426	-	TE	0.050947	0.072112	-0.021165	0.603	K4	0.8424	FALSE	exclusion
ENSG00000066322	ELOVL1	41	1:43829073-43829398	-	TE	0.18092	0.061007	0.11991	0.752	K4	0.8424	FALSE	inclusion
ENSG00000066322	ELOVL1	42	1:43829068-43829072	-	TE	0.049067	0.062614	-0.013547	0.587	K4	0.8424	FALSE	exclusion
ENSG00000066379	POLR1H	1	6:30026676-30029030	+	TS	0.023517	0.018101	0.0054159	0.562	K3	0	FALSE	inclusion
ENSG00000066379	POLR1H	2	6:30029031-30029033	+	TS	0.023443	0.0177	0.0057432	0.571	K3	0	FALSE	inclusion
ENSG00000066379	POLR1H	3	6:30029034-30029035	+	TS	0.024018	0.01804	0.0059785	0.59	K3	0	FALSE	inclusion
ENSG00000066379	POLR1H	4	6:30029036-30029039	+	TS	0.023001	0.017692	0.0053085	0.555	K3	0	FALSE	inclusion
ENSG00000066379	POLR1H	5	6:30029040-30029106	+	TS	0.023229	0.018229	0.0049994	0.593	K3	0	FALSE	inclusion
ENSG00000066379	POLR1H	6	6:30029107-30029166	+	TS	0.97618	0.98165	-0.0054703	0.565	K3	0	FALSE	exclusion
ENSG00000066405	CLDN18	2	3:137728842-137729057	+	TS	0.11712	0.14329	-0.026176	0.553	K1	1	FALSE	exclusion
ENSG00000066405	CLDN18	3	3:137729058-137729287	+	TS	0.88267	0.85764	0.025034	0.579	K1	1	FALSE	inclusion
ENSG00000066405	CLDN18	7	3:137749812-137751344	+	TE	0.075711	0.039161	0.03655	0.727	K2	0.629	FALSE	inclusion
ENSG00000066405	CLDN18	8	3:137751345-137752491	+	TE	0.011321	0.010482	0.0008388	0.533	K2	0.629	FALSE	inclusion
ENSG00000066405	CLDN18	9	3:137752492-137752494	+	TE	0.92365	0.96069	-0.037043	0.695	K2	0.629	FALSE	exclusion
ENSG00000066422	ZBTB11	1	3:101395963-101396339	-	TS	0.083122	0.026449	0.056673	0.671	K1	0.7667	FALSE	inclusion
ENSG00000066422	ZBTB11	2	3:101395449-101395962	-	TS	0.91712	0.97394	-0.056823	0.7	K1	0.7667	FALSE	exclusion
ENSG00000066777	ARFGEF1	53	8:68111246-68111333	-	TE	0.090303	0.10012	-0.0098205	0.56	K2	0.9964	FALSE	exclusion
ENSG00000066777	ARFGEF1	54	8:68110640-68111245	-	TE	0.22715	0.26225	-0.035102	0.56	K2	0.9964	FALSE	exclusion
ENSG00000066777	ARFGEF1	55	8:68109909-68110639	-	TE	0.48271	0.2162	0.26651	0.705	K2	0.9964	FALSE	inclusion
ENSG00000066777	ARFGEF1	56	8:68109884-68109908	-	TE	0.3773	0.61704	-0.23975	0.684	K2	0.9964	FALSE	exclusion
ENSG00000066777	ARFGEF1	57	8:68087722-68087807	-	TE	0.015766	0.015369	0.00039673	0.551	K1	0	FALSE	inclusion
ENSG00000066777	ARFGEF1	58	8:68085747-68087721	-	TE	0.98439	0.98463	-0.0002363	0.529	K1	0	FALSE	exclusion
ENSG00000066855	MTFR1	29	8:66631615-66631716	+	CE	0.93872	0.9308	0.0079175	0.503	K0	0	FALSE	inclusion
ENSG00000066923	STAG3	64	7:99809418-99809499	+	CE	0.92562	0.90171	0.023915	0.558	K0	0	FALSE	inclusion
ENSG00000066923	STAG3	66	7:99811630-99812003	+	TE	0.94102	0.91675	0.024276	0.556	K3	0.0248	FALSE	inclusion
ENSG00000066923	STAG3	67	7:99812004-99812004	+	TE	0.062778	0.083301	-0.020523	0.577	K3	0.0248	FALSE	exclusion
ENSG00000066923	STAG3	68	7:99812005-99812005	+	TE	0.057989	0.080614	-0.022625	0.589	K3	0.0248	FALSE	exclusion
ENSG00000066923	STAG3	69	7:99812006-99812006	+	TE	0.058257	0.082338	-0.024081	0.598	K3	0.0248	FALSE	exclusion
ENSG00000066923	STAG3	70	7:99812007-99812010	+	TE	0.055052	0.0826	-0.027548	0.597	K3	0.0248	FALSE	exclusion
ENSG00000066933	MYO9A	79	15:72118613-72119380	-	TE	0.06107	0.086945	-0.025875	0.502	K3	0.9264	FALSE	exclusion
ENSG00000066933	MYO9A	80	15:72118390-72118612	-	TE	0.16508	0.042182	0.1229	0.783	K3	0.9264	FALSE	inclusion
ENSG00000066933	MYO9A	81	15:72118369-72118389	-	TE	0.063744	0.041589	0.022154	0.606	K3	0.9264	FALSE	inclusion
ENSG00000066933	MYO9A	82	15:72118333-72118368	-	TE	0.060977	0.041001	0.019976	0.623	K3	0.9264	FALSE	inclusion
ENSG00000066933	MYO9A	83	15:72114632-72118332	-	TE	0.83437	0.91233	-0.077958	0.7	K3	0.9264	FALSE	exclusion
ENSG00000067064	IDI1	13	10:1086843-1087444	-	TE	0.12712	0.30706	-0.17994	0.694	K1	0.9958	FALSE	exclusion
ENSG00000067064	IDI1	14	10:1085848-1086842	-	TE	0.87295	0.69533	0.17762	0.683	K1	0.9958	FALSE	inclusion
ENSG00000067182	TNFRSF1A	1	12:6451252-6451280	-	TS	0.12918	0.114	0.015178	0.515	K3	0.6968	FALSE	inclusion
ENSG00000067182	TNFRSF1A	2	12:6451208-6451251	-	TS	0.11987	0.11724	0.0026259	0.501	K3	0.6968	FALSE	inclusion
ENSG00000067182	TNFRSF1A	3	12:6451202-6451207	-	TS	0.12015	0.10983	0.010322	0.551	K3	0.6968	FALSE	inclusion
ENSG00000067182	TNFRSF1A	4	12:6451194-6451201	-	TS	0.12599	0.11016	0.01583	0.549	K3	0.6968	FALSE	inclusion
ENSG00000067182	TNFRSF1A	6	12:6451149-6451170	-	TS	0.20605	0.11288	0.093164	0.721	K3	0.6968	FALSE	inclusion
ENSG00000067182	TNFRSF1A	7	12:6451015-6451148	-	TS	0.11992	0.11233	0.0075916	0.506	K3	0.6968	FALSE	inclusion
[truncated: 20,291 more rows]

## Sheet: S10c (GO results)
Supplemental Table S11: Alternative splicing events detected in NHA cell lines. c GO terms associated with genes affected by significant splicing events (b) were annotated using CluterProfiler. Those with p-values < 0.05 are shown.
ID	Description	GeneRatio	BgRatio	pvalue	p.adjust	qvalue	geneID	Count	Cluster_id
GO:0048193	Golgi vesicle transport	19/405	298/18903	2.52901e-05	0.0536754	0.0521638	AP1G1/DNM2/GABARAPL2/GCC2/GOLGA2/KDELR3/KLHL12/MPPE1/PDCD6/RAB6A/RANGRF/SAR1A/SEC13/TMED5/TMED7/TRAPPC4/TRIP11/VPS54/VTI1B	19	1
GO:0006888	endoplasmic reticulum to Golgi vesicle-mediated transport	12/405	134/18903	3.18782e-05	0.0536754	0.0521638	GOLGA2/KDELR3/KLHL12/MPPE1/PDCD6/RANGRF/SAR1A/SEC13/TMED5/TMED7/TRAPPC4/TRIP11	12	1
GO:0051650	establishment of vesicle localization	12/405	197/18903	0.00115086	0.455033	0.442219	ASIP/BICDL1/CNIH2/DNM2/KLHL12/LIMK2/PDCD6/PINK1/SAR1A/SPG11/TRAPPC4/TRIP11	12	1
GO:0090114	COPII-coated vesicle budding	5/405	43/18903	0.0021704	0.455033	0.442219	KLHL12/PDCD6/SAR1A/SEC13/TRAPPC4	5	1
GO:0051648	vesicle localization	12/405	213/18903	0.00222497	0.455033	0.442219	ASIP/BICDL1/CNIH2/DNM2/KLHL12/LIMK2/PDCD6/PINK1/SAR1A/SPG11/TRAPPC4/TRIP11	12	1
GO:0048207	vesicle targeting, rough ER to cis-Golgi	4/405	27/18903	0.00246587	0.455033	0.442219	KLHL12/PDCD6/SAR1A/TRAPPC4	4	1
GO:0048208	COPII vesicle coating	4/405	27/18903	0.00246587	0.455033	0.442219	KLHL12/PDCD6/SAR1A/TRAPPC4	4	1
GO:0051656	establishment of organelle localization	19/405	437/18903	0.00294945	0.455033	0.442219	ASIP/BICDL1/CHMP4A/CNIH2/DNM2/GPSM1/KIFC1/KLHL12/LIMK2/MAP1B/PDCD6/PINK1/RAB6A/SAR1A/SPG11/SUN2/TRAPPC4/TRIP11/TTL	19	1
GO:0032527	protein exit from endoplasmic reticulum	5/405	48/18903	0.00353853	0.460222	0.447261	GCC2/RANGRF/SAR1A/SEC13/UFD1	5	1
GO:0048199	vesicle targeting, to, from or within Golgi	4/405	34/18903	0.00579309	0.500771	0.486668	KLHL12/PDCD6/SAR1A/TRAPPC4	4	1
GO:0006900	vesicle budding from membrane	6/405	83/18903	0.00880267	0.535062	0.519993	CHMP4A/KLHL12/PDCD6/SAR1A/SEC13/TRAPPC4	6	1
GO:0016050	vesicle organization	15/405	353/18903	0.00950811	0.535062	0.519993	AP1G1/ASIP/ATP6AP1/ATP6V0B/CAV2/CHMP4A/KLHL12/LAPTM4B/PDCD6/SAR1A/SEC13/SPG11/SPHK1/TRAPPC4/VTI1B	15	1
GO:0006901	vesicle coating	4/405	40/18903	0.0103266	0.535062	0.519993	KLHL12/PDCD6/SAR1A/TRAPPC4	4	1
GO:0006903	vesicle targeting	5/405	67/18903	0.0143641	0.542899	0.52761	KLHL12/PDCD6/SAR1A/TRAPPC4/TRIP11	5	1
GO:0010952	positive regulation of peptidase activity	11/405	194/18903	0.00318557	0.455033	0.442219	ASPH/BCL2L11/EFNA1/HSPE1/HTRA2/NODAL/PDCD5/PDCD6/PINK1/PPM1F/SMAD3	11	2
GO:2001056	positive regulation of cysteine-type endopeptidase activity	9/405	143/18903	0.00373088	0.460222	0.447261	ASPH/BCL2L11/HSPE1/HTRA2/NODAL/PDCD5/PDCD6/PPM1F/SMAD3	9	2
GO:0010950	positive regulation of endopeptidase activity	10/405	174/18903	0.00438735	0.460222	0.447261	ASPH/BCL2L11/EFNA1/HSPE1/HTRA2/NODAL/PDCD5/PDCD6/PPM1F/SMAD3	10	2
GO:0043280	positive regulation of cysteine-type endopeptidase activity involved in apoptotic process	8/405	125/18903	0.00553172	0.500771	0.486668	BCL2L11/HSPE1/HTRA2/NODAL/PDCD5/PDCD6/PPM1F/SMAD3	8	2
GO:2000116	regulation of cysteine-type endopeptidase activity	11/405	235/18903	0.0127996	0.542899	0.52761	ASPH/BCL2L11/HSPE1/HTRA2/MICAL1/NODAL/PDCD5/PDCD6/POR/PPM1F/SMAD3	11	2
GO:0043281	regulation of cysteine-type endopeptidase activity involved in apoptotic process	10/405	205/18903	0.0132183	0.542899	0.52761	BCL2L11/HSPE1/HTRA2/MICAL1/NODAL/PDCD5/PDCD6/POR/PPM1F/SMAD3	10	2
GO:0045862	positive regulation of proteolysis	15/405	372/18903	0.0147622	0.542899	0.52761	ARIH1/ASPH/BCL2L11/EFNA1/ENO1/HSPE1/HTRA2/KEAP1/NODAL/PDCD5/PDCD6/PINK1/PPM1F/SMAD3/SOCS4	15	2
GO:0030903	notochord development	3/405	18/18903	0.00627091	0.500771	0.486668	EFNA1/PPP1R35/YAP1	3	3
GO:0003143	embryonic heart tube morphogenesis	5/405	70/18903	0.0170962	0.542899	0.52761	ARL13B/NDRG4/NODAL/SMAD3/YAP1	5	3
GO:0051894	positive regulation of focal adhesion assembly	3/405	26/18903	0.0176142	0.542899	0.52761	PPM1F/SMAD3/THY1	3	3
GO:0030521	androgen receptor signaling pathway	4/405	47/18903	0.0179398	0.542899	0.52761	ARID1A/KDM1A/NODAL/PLPP1	4	3
GO:2000036	regulation of stem cell population maintenance	5/405	71/18903	0.0180783	0.542899	0.52761	ARID1A/HMGA2/NODAL/RBBP4/YAP1	5	3
GO:0007498	mesoderm development	7/405	136/18903	0.0273233	0.582185	0.56579	HMGA2/MESD/NODAL/SETD2/SMAD3/YAP1/ZFPM2	7	3
GO:0150117	positive regulation of cell-substrate junction organization	3/405	31/18903	0.0281616	0.584866	0.568395	PPM1F/SMAD3/THY1	3	3
GO:0001570	vasculogenesis	5/405	81/18903	0.0299805	0.584866	0.568395	HDAC7/SETD2/TIPARP/YAP1/ZFPM2	5	3
GO:0035050	embryonic heart tube development	5/405	84/18903	0.034324	0.597185	0.580367	ARL13B/NDRG4/NODAL/SMAD3/YAP1	5	3
GO:0071383	cellular response to steroid hormone stimulus	9/405	209/18903	0.0366462	0.597185	0.580367	ARID1A/BCL2L11/FAM107A/IGF1R/KDM1A/NODAL/NR3C2/PLPP1/YAP1	9	3
GO:0045444	fat cell differentiation	10/405	244/18903	0.0380789	0.597185	0.580367	ALDH6A1/HMGA2/NAPEPLD/NIPBL/PSMB8/SMAD3/SREBF1/STEAP4/YAP1/ZFPM2	10	3
GO:0060485	mesenchyme development	12/405	313/18903	0.0381021	0.597185	0.580367	EFNA1/ERBB3/HMGA2/KLHL12/LOXL3/NODAL/NRG1/PDCD6/RANBP3L/SMAD3/YAP1/ZFPM2	12	3
GO:0030518	intracellular steroid hormone receptor signaling pathway	6/405	116/18903	0.0387632	0.597185	0.580367	ARID1A/KDM1A/NODAL/NR3C2/PLPP1/YAP1	6	3
GO:0001947	heart looping	4/405	64/18903	0.0483069	0.622701	0.605164	ARL13B/NDRG4/NODAL/SMAD3	4	3
GO:0051893	regulation of focal adhesion assembly	4/405	64/18903	0.0483069	0.622701	0.605164	FAM107A/PPM1F/SMAD3/THY1	4	3
GO:0090109	regulation of cell-substrate junction assembly	4/405	64/18903	0.0483069	0.622701	0.605164	FAM107A/PPM1F/SMAD3/THY1	4	3
GO:1903358	regulation of Golgi organization	3/405	17/18903	0.00530919	0.500771	0.486668	AKAP9/DNM2/PDE4DIP	3	4
GO:1904064	positive regulation of cation transmembrane transport	9/405	171/18903	0.0116041	0.535062	0.519993	AKAP9/ATP1B3/CACNB2/DNM2/PINK1/SRI/STIM1/THY1/VMP1	9	4
GO:0032414	positive regulation of ion transmembrane transporter activity	7/405	115/18903	0.0119437	0.53694	0.521819	AKAP9/ATP1B3/CACNB2/DNM2/PINK1/STIM1/VMP1	7	4
GO:0032412	regulation of ion transmembrane transporter activity	12/405	281/18903	0.018526	0.542899	0.52761	AKAP9/ATP1B3/CACNB2/CNIH2/CRBN/DNM2/PINK1/RANGRF/SLC6A9/SRI/STIM1/VMP1	12	4
GO:0032411	positive regulation of transporter activity	7/405	126/18903	0.0188962	0.542899	0.52761	AKAP9/ATP1B3/CACNB2/DNM2/PINK1/STIM1/VMP1	7	4
GO:0034767	positive regulation of ion transmembrane transport	9/405	186/18903	0.0191081	0.542899	0.52761	AKAP9/ATP1B3/CACNB2/DNM2/PINK1/SRI/STIM1/THY1/VMP1	9	4
GO:0022898	regulation of transmembrane transporter activity	12/405	291/18903	0.0235671	0.558522	0.542793	AKAP9/ATP1B3/CACNB2/CNIH2/CRBN/DNM2/PINK1/RANGRF/SLC6A9/SRI/STIM1/VMP1	12	4
GO:1901018	positive regulation of potassium ion transmembrane transporter activity	3/405	29/18903	0.0236187	0.558522	0.542793	AKAP9/ATP1B3/DNM2	3	4
GO:0086004	regulation of cardiac muscle cell contraction	3/405	34/18903	0.0357798	0.597185	0.580367	AKAP9/RANGRF/SRI	3	4
GO:0032409	regulation of transporter activity	12/405	326/18903	0.0491864	0.622701	0.605164	AKAP9/ATP1B3/CACNB2/CNIH2/CRBN/DNM2/PINK1/RANGRF/SLC6A9/SRI/STIM1/VMP1	12	4
GO:1904427	positive regulation of calcium ion transmembrane transport	5/405	93/18903	0.0495984	0.622701	0.605164	CACNB2/SRI/STIM1/THY1/VMP1	5	4
GO:0031065	positive regulation of histone deacetylation	3/405	23/18903	0.0125771	0.542899	0.52761	NIPBL/PINK1/SREBF1	3	5
GO:0006476	protein deacetylation	7/405	122/18903	0.0161044	0.542899	0.52761	HDAC7/HDAC9/NIPBL/PINK1/RBBP4/SIRT3/SREBF1	7	5
GO:0016575	histone deacetylation	6/405	102/18903	0.0224672	0.558522	0.542793	HDAC7/HDAC9/NIPBL/PINK1/RBBP4/SREBF1	6	5
GO:0031058	positive regulation of histone modification	6/405	102/18903	0.0224672	0.558522	0.542793	KDM1A/NIPBL/NSD3/PINK1/SREBF1/UBE2N	6	5
GO:0090312	positive regulation of protein deacetylation	3/405	29/18903	0.0236187	0.558522	0.542793	NIPBL/PINK1/SREBF1	3	5
GO:0035601	protein deacylation	7/405	133/18903	0.0245687	0.56509	0.549176	HDAC7/HDAC9/NIPBL/PINK1/RBBP4/SIRT3/SREBF1	7	5
GO:0098732	macromolecule deacylation	7/405	137/18903	0.0282863	0.584866	0.568395	HDAC7/HDAC9/NIPBL/PINK1/RBBP4/SIRT3/SREBF1	7	5
GO:0031056	regulation of histone modification	8/405	175/18903	0.035175	0.597185	0.580367	KDM1A/NIPBL/NSD3/PINK1/SETD7/SREBF1/UBE2N/ZNF451	8	5
GO:1903214	regulation of protein targeting to mitochondrion	4/405	44/18903	0.014351	0.542899	0.52761	HTRA2/PDCD5/PINK1/SREBF1	4	6
GO:1903747	regulation of establishment of protein localization to mitochondrion	4/405	50/18903	0.0220408	0.558522	0.542793	HTRA2/PDCD5/PINK1/SREBF1	4	6
GO:1903955	positive regulation of protein targeting to mitochondrion	3/405	32/18903	0.0305943	0.584866	0.568395	HTRA2/PDCD5/PINK1	3	6
GO:1903146	regulation of autophagy of mitochondrion	3/405	36/18903	0.0413871	0.602403	0.585438	HTRA2/PINK1/SREBF1	3	6
GO:1903749	positive regulation of establishment of protein localization to mitochondrion	3/405	36/18903	0.0413871	0.602403	0.585438	HTRA2/PDCD5/PINK1	3	6
GO:0042407	cristae formation	3/405	18/18903	0.00627091	0.500771	0.486668	IMMT/PINK1/UQCC3	3	7
GO:1903008	organelle disassembly	8/405	139/18903	0.010251	0.535062	0.519993	ATG9A/GABARAPL2/GOLGA2/HTRA2/MRRF/PINK1/SNX7/SREBF1	8	7
GO:0048489	synaptic vesicle transport	4/405	40/18903	0.0103266	0.535062	0.519993	CNIH2/DNM2/PINK1/SPG11	4	7
GO:0099601	regulation of neurotransmitter receptor activity	5/405	62/18903	0.0104908	0.535062	0.519993	AKAP9/CNIH2/PATE1/PINK1/SLC6A9	5	7
GO:2000310	regulation of NMDA receptor activity	3/405	22/18903	0.0111102	0.535062	0.519993	CNIH2/PINK1/SLC6A9	3	7
GO:1905037	autophagosome organization	7/405	117/18903	0.0130425	0.542899	0.52761	ATG9A/CHMP4A/GABARAPL2/PINK1/SNX7/SPG11/VMP1	7	7
GO:0031398	positive regulation of protein ubiquitination	7/405	119/18903	0.0142121	0.542899	0.52761	CENPS/FAM107A/KDM1A/PDCD6/PINK1/SPHK1/UBE2N	7	7
GO:0000422	autophagy of mitochondrion	6/405	93/18903	0.0148984	0.542899	0.52761	ATG9A/GABARAPL2/HTRA2/PINK1/SNX7/SREBF1	6	7
GO:0061726	mitochondrion disassembly	6/405	93/18903	0.0148984	0.542899	0.52761	ATG9A/GABARAPL2/HTRA2/PINK1/SNX7/SREBF1	6	7
GO:0007033	vacuole organization	10/405	213/18903	0.0168558	0.542899	0.52761	ATG9A/ATP6AP1/ATP6V0B/CHMP4A/GABARAPL2/LAPTM4B/PINK1/SNX7/SPG11/VMP1	10	7
GO:0090200	positive regulation of release of cytochrome c from mitochondria	3/405	27/18903	0.0195077	0.542899	0.52761	BCL2L11/PDCD5/PINK1	3	7
GO:0016236	macroautophagy	13/405	317/18903	0.0197069	0.544735	0.529394	ATG10/ATG9A/ATP6V0B/CHMP4A/GABARAPL2/GPSM1/HTRA2/PINK1/SCOC/SNX7/SPG11/VMP1/VTI1B	13	7
GO:2001243	negative regulation of intrinsic apoptotic signaling pathway	6/405	101/18903	0.0215199	0.558522	0.542793	CD74/ENO1/HTRA2/KDM1A/PINK1/VDAC2	6	7
GO:0044088	regulation of vacuole organization	4/405	51/18903	0.0235245	0.558522	0.542793	CHMP4A/LAPTM4B/PINK1/SNX7	4	7
GO:0097479	synaptic vesicle localization	4/405	52/18903	0.0250673	0.56509	0.549176	CNIH2/DNM2/PINK1/SPG11	4	7
GO:1903322	positive regulation of protein modification by small protein conjugation or removal	7/405	137/18903	0.0282863	0.584866	0.568395	CENPS/FAM107A/KDM1A/PDCD6/PINK1/SPHK1/UBE2N	7	7
GO:2001234	negative regulation of apoptotic signaling pathway	10/405	233/18903	0.0291254	0.584866	0.568395	CD74/ENO1/FAIM/HTRA2/IL7/KDM1A/PINK1/TMBIM1/VDAC2/YAP1	10	7
GO:0032386	regulation of intracellular transport	13/405	336/18903	0.0298086	0.584866	0.568395	CAMK1/CNIH2/GCC2/HTRA2/MAP1B/NDRG4/PDCD5/PINK1/PPP1R12A/SAR1A/SETD2/SMAD3/SREBF1	13	7
GO:0000045	autophagosome assembly	6/405	110/18903	0.0310672	0.591144	0.574496	ATG9A/CHMP4A/GABARAPL2/PINK1/SNX7/VMP1	6	7
GO:0010506	regulation of autophagy	13/405	344/18903	0.0350312	0.597185	0.580367	ATP6V0B/BCL2L11/CHMP4A/CRYBA1/GFAP/GOLGA2/GPSM1/HTRA2/KEAP1/PINK1/SCOC/SNX7/SREBF1	13	7
GO:0022900	electron transport chain	8/405	176/18903	0.0361927	0.597185	0.580367	ASPH/CYB561/GPX2/NDUFA5/PINK1/POR/STEAP4/UQCC3	8	7
GO:0007006	mitochondrial membrane organization	6/405	120/18903	0.0445124	0.612651	0.595398	BCL2L11/IMMT/PDCD5/PINK1/UQCC3/VDAC2	6	7
GO:0045185	maintenance of protein location	5/405	93/18903	0.0495984	0.622701	0.605164	KDELR3/KEAP1/PINK1/SRI/SUN2	5	7
GO:0007020	microtubule nucleation	5/405	38/18903	0.00123511	0.455033	0.442219	AKAP9/CCDC57/GOLGA2/PDE4DIP/RANGRF	5	8
GO:0031109	microtubule polymerization or depolymerization	9/405	124/18903	0.00141417	0.455033	0.442219	AKAP9/APC/CCDC57/CCSAP/GOLGA2/KIF2A/MAP1B/PDE4DIP/RANGRF	9	8
GO:0051258	protein polymerization	14/405	281/18903	0.00309948	0.455033	0.442219	ADD1/AKAP9/CCDC57/CHMP4A/DAAM2/FAM107A/GOLGA2/MAP1B/PDE4DIP/PINK1/RANGRF/SPTBN2/SVIL/VDAC2	14	8
GO:0032886	regulation of microtubule-based process	13/405	252/18903	0.00320062	0.455033	0.442219	AKAP9/APC/CCSAP/CHMP4A/CNIH2/DNAH11/FAM107A/KLHL42/MAP1B/PDE4DIP/PPP1R35/RANGRF/TACR2	13	8
GO:0046785	microtubule polymerization	6/405	85/18903	0.00984506	0.535062	0.519993	AKAP9/CCDC57/GOLGA2/MAP1B/PDE4DIP/RANGRF	6	8
GO:0032271	regulation of protein polymerization	10/405	201/18903	0.0116379	0.535062	0.519993	ADD1/AKAP9/DAAM2/MAP1B/PDE4DIP/PINK1/RANGRF/SPTBN2/SVIL/VDAC2	10	8
GO:0043254	regulation of protein-containing complex assembly	16/405	410/18903	0.015952	0.542899	0.52761	ADD1/AKAP9/BCL2L11/CRBN/DAAM2/GFAP/MAP1B/NRG1/PDE4DIP/PINK1/RANGRF/RAP1B/SAR1A/SPTBN2/SVIL/VDAC2	16	8
GO:0070507	regulation of microtubule cytoskeleton organization	8/405	155/18903	0.0187191	0.542899	0.52761	AKAP9/APC/CCSAP/CHMP4A/FAM107A/MAP1B/PDE4DIP/RANGRF	8	8
GO:0031113	regulation of microtubule polymerization	4/405	54/18903	0.0283324	0.584866	0.568395	AKAP9/MAP1B/PDE4DIP/RANGRF	4	8
GO:0031116	positive regulation of microtubule polymerization	3/405	32/18903	0.0305943	0.584866	0.568395	AKAP9/MAP1B/PDE4DIP	3	8
GO:0031110	regulation of microtubule polymerization or depolymerization	5/405	87/18903	0.0390383	0.597185	0.580367	AKAP9/APC/MAP1B/PDE4DIP/RANGRF	5	8
GO:0031112	positive regulation of microtubule polymerization or depolymerization	3/405	36/18903	0.0413871	0.602403	0.585438	AKAP9/MAP1B/PDE4DIP	3	8
GO:0051261	protein depolymerization	9/405	118/18903	0.000996576	0.455033	0.442219	ADD1/APC/ASPH/CCSAP/KIF2A/MAP1B/MICAL1/SPTBN2/SVIL	9	9
GO:0022411	cellular component disassembly	21/405	483/18903	0.00181893	0.455033	0.442219	ADD1/APC/ARID1A/ASPH/ATG9A/CCSAP/CHMP4A/GABARAPL2/GOLGA2/HTRA2/IGF1R/KIF2A/MAP1B/MICAL1/MRRF/PINK1/SNX7/SPTBN2/SREBF1/SVIL/VMP1	21	9
GO:0032984	protein-containing complex disassembly	13/405	242/18903	0.00225737	0.455033	0.442219	ADD1/APC/ARID1A/ASPH/CCSAP/CHMP4A/IGF1R/KIF2A/MAP1B/MICAL1/SPTBN2/SVIL/VMP1	13	9
GO:0010639	negative regulation of organelle organization	16/405	366/18903	0.00580758	0.500771	0.486668	ACD/ADD1/APC/CHMP4A/CORO1B/DNM2/DYNC1LI1/LIMK2/MAP1B/NME6/PINK1/SETMAR/SMG6/SPTBN2/SVIL/YAP1	16	9
GO:1901879	regulation of protein depolymerization	6/405	88/18903	0.0115691	0.535062	0.519993	ADD1/APC/ASPH/MAP1B/SPTBN2/SVIL	6	9
GO:0007019	microtubule depolymerization	4/405	46/18903	0.0166876	0.542899	0.52761	APC/CCSAP/KIF2A/MAP1B	4	9
GO:0043244	regulation of protein-containing complex disassembly	7/405	126/18903	0.0188962	0.542899	0.52761	ADD1/APC/ASPH/IGF1R/MAP1B/SPTBN2/SVIL	7	9
GO:1901880	negative regulation of protein depolymerization	5/405	72/18903	0.0190968	0.542899	0.52761	ADD1/APC/MAP1B/SPTBN2/SVIL	5	9
GO:0043242	negative regulation of protein-containing complex disassembly	5/405	82/18903	0.0313875	0.594474	0.577732	ADD1/APC/MAP1B/SPTBN2/SVIL	5	9
GO:0030042	actin filament depolymerization	4/405	59/18903	0.037555	0.597185	0.580367	ADD1/MICAL1/SPTBN2/SVIL	4	9
GO:0006486	protein glycosylation	13/405	225/18903	0.00118114	0.455033	0.442219	B4GALT2/DHDDS/FKRP/GALNT7/GALNTL6/GMPPB/GOLGA2/GORASP1/MGAT1/MGAT4B/MPDU1/POMT2/TRIP11	13	10
GO:0043413	macromolecule glycosylation	13/405	225/18903	0.00118114	0.455033	0.442219	B4GALT2/DHDDS/FKRP/GALNT7/GALNTL6/GMPPB/GOLGA2/GORASP1/MGAT1/MGAT4B/MPDU1/POMT2/TRIP11	13	10
GO:0070085	glycosylation	13/405	244/18903	0.00242496	0.455033	0.442219	B4GALT2/DHDDS/FKRP/GALNT7/GALNTL6/GMPPB/GOLGA2/GORASP1/MGAT1/MGAT4B/MPDU1/POMT2/TRIP11	13	10
GO:0009101	glycoprotein biosynthetic process	14/405	321/18903	0.00971404	0.535062	0.519993	B4GALT2/CHPF/DHDDS/FKRP/GALNT7/GALNTL6/GMPPB/GOLGA2/GORASP1/MGAT1/MGAT4B/MPDU1/POMT2/TRIP11	14	10
GO:0009100	glycoprotein metabolic process	15/405	395/18903	0.0238512	0.560777	0.544985	B4GALT2/CHPF/DHDDS/FKRP/GALNT7/GALNTL6/GANC/GMPPB/GOLGA2/GORASP1/MGAT1/MGAT4B/MPDU1/POMT2/TRIP11	15	10
GO:0007292	female gamete generation	8/405	159/18903	0.021447	0.558522	0.542793	CDC25B/HROB/IHO1/M1AP/MARF1/PAQR5/REC8/TUT7	8	11
GO:0007127	meiosis I	7/405	131/18903	0.0228421	0.558522	0.542793	BCL2L11/CDC25B/CENPS/CORT/IHO1/M1AP/REC8	7	11
GO:0048477	oogenesis	6/405	103/18903	0.0234422	0.558522	0.542793	CDC25B/IHO1/MARF1/PAQR5/REC8/TUT7	6	11
GO:0140013	meiotic nuclear division	9/405	194/18903	0.0243103	0.56509	0.549176	BCL2L11/CDC25B/CENPS/CORT/GOLGA2/IHO1/M1AP/MARF1/REC8	9	11
GO:0001556	oocyte maturation	3/405	30/18903	0.0258363	0.56509	0.549176	CDC25B/REC8/TUT7	3	11
GO:0061982	meiosis I cell cycle process	7/405	137/18903	0.0282863	0.584866	0.568395	BCL2L11/CDC25B/CENPS/CORT/IHO1/M1AP/REC8	7	11
GO:1903046	meiotic cell cycle process	9/405	212/18903	0.0395486	0.597185	0.580367	BCL2L11/CDC25B/CENPS/CORT/GOLGA2/IHO1/M1AP/MARF1/REC8	9	11
GO:0051321	meiotic cell cycle	11/405	285/18903	0.0440261	0.612651	0.595398	BCL2L11/CDC25B/CENPS/CORT/GOLGA2/IHO1/M1AP/MARF1/RBBP8/REC8/SUN2	11	11
GO:0060325	face morphogenesis	4/405	30/18903	0.00366099	0.460222	0.447261	ANKRD11/ASPH/NIPBL/TIPARP	4	12
GO:0060323	head morphogenesis	4/405	36/18903	0.00711586	0.535062	0.519993	ANKRD11/ASPH/NIPBL/TIPARP	4	12
GO:0010171	body morphogenesis	4/405	48/18903	0.019249	0.542899	0.52761	ANKRD11/ASPH/NIPBL/TIPARP	4	12
GO:0060324	face development	4/405	51/18903	0.0235245	0.558522	0.542793	ANKRD11/ASPH/NIPBL/TIPARP	4	12
GO:0008542	visual learning	5/405	47/18903	0.00322561	0.455033	0.442219	B4GALT2/HMGCR/MEIS2/NDRG4/PPP1R1B	5	13
GO:0007632	visual behavior	5/405	53/18903	0.00543666	0.500771	0.486668	B4GALT2/HMGCR/MEIS2/NDRG4/PPP1R1B	5	13
GO:0008306	associative learning	5/405	85/18903	0.0358539	0.597185	0.580367	B4GALT2/HMGCR/MEIS2/NDRG4/PPP1R1B	5	13
GO:0007612	learning	7/405	150/18903	0.0429426	0.612651	0.595398	B4GALT2/EIF2AK4/HMGCR/MEIS2/NDRG4/PPP1R1B/TACR2	7	13
GO:0000280	nuclear division	22/405	481/18903	0.000744804	0.455033	0.442219	APC/ARID1A/ARID1B/BCL2L11/CAV2/CCSAP/CDC25B/CENPS/CHMP4A/CORT/DYNC1LI1/GOLGA2/IHO1/KIF2A/KIFC1/M1AP/MARF1/NAA50/NIPBL/NME6/REC8/SPHK1	22	14
GO:2000779	regulation of double-strand break repair	9/405	135/18903	0.00253832	0.455033	0.442219	ARID1A/ARID1B/DTX3L/HMGA2/KDM1A/RBBP8/SETD2/SETMAR/UBE2N	9	14
GO:0010452	histone H3-K36 methylation	3/405	14/18903	0.0029806	0.455033	0.442219	NSD3/SETD2/SETMAR	3	14
GO:0006302	double-strand break repair	14/405	300/18903	0.00550518	0.500771	0.486668	ARID1A/ARID1B/DCLRE1C/DTX3L/GINS4/HMGA2/KDM1A/MARF1/NIPBL/RBBP8/REC8/SETD2/SETMAR/UBE2N	14	14
GO:0098813	nuclear chromosome segregation	14/405	321/18903	0.00971404	0.535062	0.519993	APC/ARID1A/ARID1B/CENPS/CHMP4A/CORT/DYNC1LI1/IHO1/KIFC1/M1AP/NAA50/NIPBL/REC8/TTL	14	14
GO:0140014	mitotic nuclear division	14/405	325/18903	0.010746	0.535062	0.519993	APC/ARID1A/ARID1B/CAV2/CCSAP/CHMP4A/DYNC1LI1/GOLGA2/KIF2A/KIFC1/NAA50/NIPBL/NME6/SPHK1	14	14
GO:0000729	DNA double-strand break processing	3/405	22/18903	0.0111102	0.535062	0.519993	RBBP8/SETMAR/UBE2N	3	14
GO:2000781	positive regulation of double-strand break repair	6/405	88/18903	0.0115691	0.535062	0.519993	ARID1A/ARID1B/DTX3L/RBBP8/SETMAR/UBE2N	6	14
GO:0051307	meiotic chromosome separation	3/405	26/18903	0.0176142	0.542899	0.52761	CENPS/CORT/M1AP	3	14
GO:0007059	chromosome segregation	15/405	382/18903	0.0183088	0.542899	0.52761	APC/ARID1A/ARID1B/CENPS/CHMP4A/CORT/DYNC1LI1/IHO1/KIFC1/M1AP/NAA50/NIPBL/OIP5/REC8/TTL	15	14
GO:0031297	replication fork processing	4/405	48/18903	0.019249	0.542899	0.52761	CENPS/CORT/RBBP8/SETMAR	4	14
GO:0018027	peptidyl-lysine dimethylation	3/405	27/18903	0.0195077	0.542899	0.52761	SETD2/SETD7/SETMAR	3	14
GO:2001032	regulation of double-strand break repair via nonhomologous end joining	3/405	29/18903	0.0236187	0.558522	0.542793	DTX3L/HMGA2/SETMAR	3	14
GO:0051304	chromosome separation	7/405	135/18903	0.0263828	0.56509	0.549176	APC/ARID1A/ARID1B/CENPS/CORT/DYNC1LI1/M1AP	7	14
GO:0000725	recombinational repair	8/405	173/18903	0.0331982	0.597185	0.580367	GINS4/HROB/KDM1A/NIPBL/RBBP8/REC8/SETD2/UBE2N	8	14
GO:0045005	DNA-templated DNA replication maintenance of fidelity	4/405	57/18903	0.0336831	0.597185	0.580367	CENPS/CORT/RBBP8/SETMAR	4	14
GO:0006282	regulation of DNA repair	9/405	212/18903	0.0395486	0.597185	0.580367	ARID1A/ARID1B/DTX3L/HMGA2/KDM1A/RBBP8/SETD2/SETMAR/UBE2N	9	14
GO:0032481	positive regulation of type I interferon production	4/405	63/18903	0.0460341	0.622701	0.605164	IRF3/POLR3C/SETD2/ZC3HAV1	4	14
GO:0090305	nucleic acid phosphodiester bond hydrolysis	10/405	253/18903	0.0466958	0.622701	0.605164	DCLRE1C/DCPS/ENDOU/IHO1/MARF1/PAN2/RBBP8/SETMAR/SMG6/TOE1	10	14
GO:0032781	positive regulation of ATP-dependent activity	5/405	45/18903	0.00266027	0.455033	0.442219	ATP1B3/DNM2/GABARAPL2/SETMAR/VMP1	5	15
GO:1902116	negative regulation of organelle assembly	5/405	45/18903	0.00266027	0.455033	0.442219	CHMP4A/DNM2/LIMK2/PINK1/YAP1	5	15
GO:0031346	positive regulation of cell projection organization	16/405	352/18903	0.00401705	0.460222	0.447261	ABI2/APC/CAMK1/CAPRIN1/CORO1B/DNM2/EPS8L1/IGF1R/KDM1A/MAP1B/MAP3K13/NDRG4/PLEK2/PLXNC1/PPP1R35/STK24	16	15
GO:1902018	negative regulation of cilium assembly	3/405	18/18903	0.00627091	0.500771	0.486668	DNM2/LIMK2/YAP1	3	15
GO:0120032	regulation of plasma membrane bounded cell projection assembly	10/405	199/18903	0.0109035	0.535062	0.519993	ABI2/APC/DAAM2/DNM2/EPS8L1/LIMK2/PLEK2/PODXL/PPP1R35/YAP1	10	15
GO:0044089	positive regulation of cellular component biogenesis	19/405	498/18903	0.011412	0.535062	0.519993	ABI2/AKAP9/APC/BCL2L11/CRBN/DNM2/EPS8L1/MAP1B/NRG1/PAN2/PDE4DIP/PINK1/PLEK2/PPM1F/PPP1R35/RAP1B/SMAD3/SNX7/THY1	19	15
GO:0060491	regulation of cell projection assembly	10/405	201/18903	0.0116379	0.535062	0.519993	ABI2/APC/DAAM2/DNM2/EPS8L1/LIMK2/PLEK2/PODXL/PPP1R35/YAP1	10	15
GO:0043462	regulation of ATP-dependent activity	5/405	73/18903	0.0201524	0.553312	0.537729	ATP1B3/DNM2/GABARAPL2/SETMAR/VMP1	5	15
GO:0120034	positive regulation of plasma membrane bounded cell projection assembly	6/405	111/18903	0.032274	0.597185	0.580367	ABI2/APC/DNM2/EPS8L1/PLEK2/PPP1R35	6	15
GO:1902115	regulation of organelle assembly	9/405	207/18903	0.0347946	0.597185	0.580367	CCSAP/CHMP4A/DNM2/LIMK2/PAN2/PINK1/PPP1R35/SNX7/YAP1	9	15
GO:0120033	negative regulation of plasma membrane bounded cell projection assembly	3/405	37/18903	0.0443467	0.612651	0.595398	DNM2/LIMK2/YAP1	3	15
GO:0007018	microtubule-based movement	18/405	415/18903	0.00385294	0.460222	0.447261	BICDL1/CCSAP/CNIH2/DNAH11/DYNC1LI1/IFT80/KIF2A/KIFC1/KIFC3/KLC3/KLC4/LCA5L/MAP1B/PURA/RAB6A/SPG11/TACR2/TTLL3	18	16
GO:0010970	transport along microtubule	9/405	168/18903	0.0104168	0.535062	0.519993	BICDL1/CNIH2/IFT80/KLC3/LCA5L/MAP1B/PURA/RAB6A/SPG11	9	16
GO:0030705	cytoskeleton-dependent intracellular transport	10/405	208/18903	0.0145055	0.542899	0.52761	BICDL1/CNIH2/IFT80/KLC3/LCA5L/MAP1B/PURA/RAB6A/SPG11/SUN2	10	16
GO:0099111	microtubule-based transport	10/405	209/18903	0.0149547	0.542899	0.52761	BICDL1/CNIH2/DNAH11/IFT80/KLC3/LCA5L/MAP1B/PURA/RAB6A/SPG11	10	16
GO:0031102	neuron projection regeneration	6/405	62/18903	0.00208319	0.455033	0.442219	GFAP/IGF1R/MAP1B/OMG/STK24/THY1	6	17
GO:0032570	response to progesterone	4/405	39/18903	0.00945031	0.535062	0.519993	FOSB/IGF1R/SREBF1/YAP1	4	17
GO:0010893	positive regulation of steroid biosynthetic process	3/405	23/18903	0.0125771	0.542899	0.52761	IGF1R/POR/SREBF1	3	17
GO:0045940	positive regulation of steroid metabolic process	3/405	30/18903	0.0258363	0.56509	0.549176	IGF1R/POR/SREBF1	3	17
GO:0031669	cellular response to nutrient levels	10/405	231/18903	0.0276746	0.584866	0.568395	DCPS/EIF2AK4/FAM107A/GABARAPL2/IGF1R/PRKAB1/PRKAG1/SREBF1/STK24/TXN2	10	17
GO:0070570	regulation of neuron projection regeneration	3/405	34/18903	0.0357798	0.597185	0.580367	IGF1R/STK24/THY1	3	17
GO:0001659	temperature homeostasis	8/405	178/18903	0.0382873	0.597185	0.580367	APC/GNAS/IGF1R/IP6K1/KDM1A/LNPEP/NAPEPLD/PRKAB1	8	17
GO:0106106	cold-induced thermogenesis	7/405	147/18903	0.0391986	0.597185	0.580367	APC/GNAS/IGF1R/IP6K1/KDM1A/LNPEP/PRKAB1	7	17
GO:0120161	regulation of cold-induced thermogenesis	7/405	147/18903	0.0391986	0.597185	0.580367	APC/GNAS/IGF1R/IP6K1/KDM1A/LNPEP/PRKAB1	7	17
GO:0046889	positive regulation of lipid biosynthetic process	5/405	88/18903	0.040693	0.602403	0.585438	CD74/IGF1R/POR/SIRT3/SREBF1	5	17
GO:0048678	response to axon injury	5/405	89/18903	0.0423898	0.610621	0.593425	IGF1R/MAP1B/STK24/THY1/TXN2	5	17
GO:0090161	Golgi ribbon formation	4/405	10/18903	3.93611e-05	0.0536754	0.0521638	GCC2/GOLGA2/TMED5/TRIP11	4	18
GO:0007030	Golgi organization	13/405	165/18903	5.80216e-05	0.0593416	0.0576704	AKAP9/DNM2/FAM174B/GCC2/GOLGA2/GORASP1/KIFC3/PDE4DIP/TMED5/TMED7/TRIP11/VMP1/VTI1B	13	18
GO:0006984	ER-nucleus signaling pathway	5/405	47/18903	0.00322561	0.455033	0.442219	ATG10/BCL2L11/CREBZF/EIF2A/SREBF1	5	18
GO:0009226	nucleotide-sugar biosynthetic process	3/405	19/18903	0.00732982	0.535062	0.519993	GMPPB/GNPDA2/MPI	3	18
GO:0009225	nucleotide-sugar metabolic process	4/405	37/18903	0.00784608	0.535062	0.519993	GMPPB/GNPDA2/MGAT1/MPI	4	18
GO:0006896	Golgi to vacuole transport	3/405	20/18903	0.00848811	0.535062	0.519993	AP1G1/VPS54/VTI1B	3	18
GO:0097049	motor neuron apoptotic process	3/405	21/18903	0.0097477	0.535062	0.519993	ERBB3/SPG11/VPS54	3	18
GO:0016311	dephosphorylation	15/405	357/18903	0.0104676	0.535062	0.519993	CDC25B/MTMR7/PINK1/PLPP1/PLPP5/PPM1F/PPP1CB/PPP1R12A/PPP1R1B/PPP1R35/PPP2R1B/PPP2R2A/PTPN21/SMAD3/SMG6	15	18
GO:0055072	iron ion homeostasis	6/405	88/18903	0.0115691	0.535062	0.519993	ATP6AP1/CYB561/CYB561A3/FBXL5/SRI/STEAP4	6	18
GO:0051048	negative regulation of secretion	9/405	175/18903	0.013341	0.542899	0.52761	CD74/ERBB3/FRMD4A/HMGCR/NRG1/RAP1B/SREBF1/TACR2/TNFRSF1A	9	18
GO:0006879	cellular iron ion homeostasis	5/405	66/18903	0.013523	0.542899	0.52761	ATP6AP1/CYB561/CYB561A3/SRI/STEAP4	5	18
GO:0045216	cell-cell junction organization	10/405	208/18903	0.0145055	0.542899	0.52761	ADD1/APC/CLDN24/HDAC7/KIFC3/MARVELD3/NUMB/PARD6A/SMAD3/SVEP1	10	18
GO:0038034	signal transduction in absence of ligand	5/405	68/18903	0.0152397	0.542899	0.52761	BCL2L11/ERBB3/HTRA2/IL7/PPP2R1B	5	18
GO:0097192	extrinsic apoptotic signaling pathway in absence of ligand	5/405	68/18903	0.0152397	0.542899	0.52761	BCL2L11/ERBB3/HTRA2/IL7/PPP2R1B	5	18
GO:0031023	microtubule organizing center organization	8/405	150/18903	0.0156701	0.542899	0.52761	CCDC57/GCC2/GOLGA2/HAUS4/PARD6A/PDE4DIP/PPP1R12A/PPP1R35	8	18
GO:0048701	embryonic cranial skeleton morphogenesis	4/405	46/18903	0.0166876	0.542899	0.52761	NIPBL/NODAL/SETD2/SMAD3	4	18
GO:0060561	apoptotic process involved in morphogenesis	3/405	26/18903	0.0176142	0.542899	0.52761	BCL2L11/PPP2R1B/TNFRSF1A	3	18
GO:0006487	protein N-linked glycosylation	5/405	71/18903	0.0180783	0.542899	0.52761	DHDDS/GORASP1/MGAT1/MGAT4B/MPDU1	5	18
GO:0009314	response to radiation	17/405	452/18903	0.0183279	0.542899	0.52761	ABCG5/B4GALT2/BACE1/BRAT1/DCLRE1C/DNM2/EIF2AK4/FBXL22/HMGCR/KDM1A/MEIS2/NDRG4/NIPBL/PDE6B/PPP1CB/PPP1R1B/YAP1	17	18
GO:0046174	polyol catabolic process	3/405	27/18903	0.0195077	0.542899	0.52761	GK/MTMR7/TPI1	3	18
GO:0019080	viral gene expression	6/405	100/18903	0.0205999	0.558108	0.542391	EIF2AK4/HMGA2/MGAT1/MGAT4B/SPCS3/TAF11	6	18
GO:0048709	oligodendrocyte differentiation	6/405	100/18903	0.0205999	0.558108	0.542391	DAAM2/EIF2B4/EIF2B5/KCNJ10/NRG1/TRPC4	6	18
GO:0090307	mitotic spindle assembly	5/405	74/18903	0.0212454	0.558522	0.542793	CCSAP/CHMP4A/GOLGA2/KIF2A/KIFC1	5	18
GO:0014072	response to isoquinoline alkaloid	3/405	28/18903	0.0215092	0.558522	0.542793	FOSB/PPP1R1B/PPP2R2A	3	18
GO:0043278	response to morphine	3/405	28/18903	0.0215092	0.558522	0.542793	FOSB/PPP1R1B/PPP2R2A	3	18
GO:0008630	intrinsic apoptotic signaling pathway in response to DNA damage	6/405	102/18903	0.0224672	0.558522	0.542793	BCL2L11/CD74/HTRA2/KDM1A/SHISA5/TNFRSF1A	6	18
GO:0097191	extrinsic apoptotic signaling pathway	10/405	224/18903	0.0230025	0.558522	0.542793	BCL2L11/ERBB3/FAIM/HTRA2/IL7/PPP2R1B/SMAD3/TMBIM1/TNFRSF1A/YAP1	10	18
GO:0043153	entrainment of circadian clock by photoperiod	3/405	29/18903	0.0236187	0.558522	0.542793	FBXL22/PDE6B/PPP1CB	3	18
GO:1902850	microtubule cytoskeleton organization involved in mitosis	8/405	163/18903	0.024445	0.56509	0.549176	CCSAP/CHMP4A/GOLGA2/GPSM1/KIF2A/KIFC1/SETD2/SUN2	8	18
GO:0048705	skeletal system morphogenesis	10/405	227/18903	0.024929	0.56509	0.549176	ANKRD11/ATG9A/IFT80/NIPBL/NODAL/POR/SETD2/SMAD3/TIPARP/TRIP11	10	18
GO:0006913	nucleocytoplasmic transport	13/405	329/18903	0.0257253	0.56509	0.549176	CAMK1/HNRNPA2B1/NEMF/PPP1R12A/PRKAG1/RANBP3L/RANGRF/SEC13/SETD2/SMAD3/SMG6/SPG11/THOC5	13	18
GO:0051169	nuclear transport	13/405	329/18903	0.0257253	0.56509	0.549176	CAMK1/HNRNPA2B1/NEMF/PPP1R12A/PRKAG1/RANBP3L/RANGRF/SEC13/SETD2/SMAD3/SMG6/SPG11/THOC5	13	18
GO:0007098	centrosome cycle	7/405	135/18903	0.0263828	0.56509	0.549176	CCDC57/GOLGA2/HAUS4/PARD6A/PDE4DIP/PPP1R12A/PPP1R35	7	18
GO:0019882	antigen processing and presentation	6/405	108/18903	0.0287431	0.584866	0.568395	CD74/DNM2/ERAP2/LNPEP/PSMB8/RAB6A	6	18
GO:0060632	regulation of microtubule-based movement	4/405	55/18903	0.0300552	0.584866	0.568395	CCSAP/CNIH2/DNAH11/TACR2	4	18
GO:0019082	viral protein processing	3/405	32/18903	0.0305943	0.584866	0.568395	MGAT1/MGAT4B/SPCS3	3	18
GO:0051085	chaperone cofactor-dependent protein refolding	3/405	32/18903	0.0305943	0.584866	0.568395	CD74/DNAJC7/HSPE1	3	18
GO:0009648	photoperiodism	3/405	33/18903	0.0331339	0.597185	0.580367	FBXL22/PDE6B/PPP1CB	3	18
GO:0060351	cartilage development involved in endochondral bone morphogenesis	3/405	33/18903	0.0331339	0.597185	0.580367	IFT80/POR/TRIP11	3	18
GO:0090659	walking behavior	3/405	33/18903	0.0331339	0.597185	0.580367	HTRA2/KCNJ10/SPG11	3	18
GO:0035196	miRNA processing	4/405	57/18903	0.0336831	0.597185	0.580367	HNRNPA2B1/SMAD3/TUT7/ZC3H10	4	18
GO:0051851	modulation by host of symbiont process	5/405	84/18903	0.034324	0.597185	0.580367	CAV2/EIF2AK4/HMGA2/NAPEPLD/TAF11	5	18
GO:0010212	response to ionizing radiation	7/405	143/18903	0.0345488	0.597185	0.580367	ABCG5/BRAT1/DCLRE1C/DNM2/KDM1A/NIPBL/YAP1	7	18
GO:0055076	transition metal ion homeostasis	7/405	143/18903	0.0345488	0.597185	0.580367	ATP6AP1/CYB561/CYB561A3/FBXL5/SLC39A7/SRI/STEAP4	7	18
GO:0006891	intra-Golgi vesicle-mediated transport	3/405	34/18903	0.0357798	0.597185	0.580367	GABARAPL2/RAB6A/VTI1B	3	18
GO:0009649	entrainment of circadian clock	3/405	34/18903	0.0357798	0.597185	0.580367	FBXL22/PDE6B/PPP1CB	3	18
GO:0060563	neuroepithelial cell differentiation	3/405	34/18903	0.0357798	0.597185	0.580367	EMX1/MAP1B/NODAL	3	18
GO:0009408	response to heat	6/405	114/18903	0.0360756	0.597185	0.580367	ASIC3/DNAJC7/EIF2B4/EIF2B5/HTRA2/PDCD6	6	18
GO:0046916	cellular transition metal ion homeostasis	6/405	116/18903	0.0387632	0.597185	0.580367	ATP6AP1/CYB561/CYB561A3/SLC39A7/SRI/STEAP4	6	18
GO:0140694	non-membrane-bounded organelle assembly	14/405	386/18903	0.0394517	0.597185	0.580367	CCDC57/CCSAP/CENPS/CHMP4A/DAZAP2/EIF2A/FLNC/GOLGA2/HAUS4/KIF2A/KIFC1/MYH11/PAN2/PPP1R35	14	18
GO:0035265	organ growth	8/405	180/18903	0.0404616	0.601921	0.58497	BCL2L11/FGF7/IFT80/IL7/NDRG4/POR/YAP1/ZFPM2	8	18
GO:0016197	endosomal transport	10/405	247/18903	0.0408182	0.602403	0.585438	ATP6AP1/CHMP4A/ERC1/GCC2/LAPTM4B/NDRG4/RAB6A/SNX7/VPS54/VTI1B	10	18
GO:0033687	osteoblast proliferation	3/405	36/18903	0.0413871	0.602403	0.585438	IFT80/IGF1R/SMAD3	3	18
GO:0019751	polyol metabolic process	6/405	118/18903	0.0415751	0.602403	0.585438	GK/IP6K1/MTMR7/PLPP1/SPHK1/TPI1	6	18
GO:0070918	small regulatory ncRNA processing	4/405	61/18903	0.041672	0.602403	0.585438	HNRNPA2B1/SMAD3/TUT7/ZC3H10	4	18
GO:0051591	response to cAMP	5/405	90/18903	0.0441285	0.612651	0.595398	AKAP9/FOSB/KDM1A/RAP1B/SREBF1	5	18
GO:0006734	NADH metabolic process	3/405	37/18903	0.0443467	0.612651	0.595398	ENO1/NUDT13/TPI1	3	18
GO:0051084	'de novo' post-translational protein folding	3/405	37/18903	0.0443467	0.612651	0.595398	CD74/DNAJC7/HSPE1	3	18
GO:1902745	positive regulation of lamellipodium organization	3/405	37/18903	0.0443467	0.612651	0.595398	ABI2/CORO1B/DNM2	3	18
GO:0048741	skeletal muscle fiber development	3/405	38/18903	0.0474086	0.622701	0.605164	CAV2/HDAC9/SPG11	3	18
GO:0042176	regulation of protein catabolic process	13/405	361/18903	0.0482475	0.622701	0.605164	APC/ARIH1/FBXL5/GABARAPL2/GFAP/HMGCR/KEAP1/LAPTM4B/NRG1/PINK1/SMAD3/SOCS4/TIPARP	13	18
GO:0048002	antigen processing and presentation of peptide antigen	4/405	64/18903	0.0483069	0.622701	0.605164	CD74/DNM2/ERAP2/LNPEP	4	18
GO:0006413	translational initiation	6/405	123/18903	0.0491559	0.622701	0.605164	BZW1/EIF2A/EIF2AK4/EIF2B4/EIF2B5/EIF4A1	6	18
GO:0042147	retrograde transport, endosome to Golgi	5/405	93/18903	0.0495984	0.622701	0.605164	ERC1/GCC2/RAB6A/VPS54/VTI1B	5	18

## Sheet: S10d (DE)
Supplemental Table S11: Alternative splicing events detected in NHA cell lines. d scRNA-seq phase-specific DE results for the 51 genes affected by significant differential splicing events.
gene_name	ensembl_id	base_mean	log2_fold_change	log_fold_change_se	stat	p_value	adjusted_p_value	phase
ASPH	ENSG00000198363	794.529	0.831198	0.259462	3.20355	0.00135744	0.024522	G1S
ASPH	ENSG00000198363	366.217	0.787391	0.237684	3.31277	0.000923773	0.0235894	MG1
ATP1B3	ENSG00000069849	425.851	-1.01079	0.263229	-3.83995	0.00012306	0.00447695	G1S
ATP1B3	ENSG00000069849	184.873	-0.922173	0.258451	-3.56808	0.000359605	0.0132428	S
ATP1B3	ENSG00000069849	81.2682	-1.04574	0.283708	-3.68598	0.000227823	0.0132726	G2
ATP1B3	ENSG00000069849	114.407	-0.803102	0.250401	-3.20726	0.00134004	0.0452245	G2M
ATP1B3	ENSG00000069849	196.422	-0.786132	0.25436	-3.09063	0.00199731	0.0402242	MG1
C9orf16	ENSG00000171159	702.002	0.722643	0.193603	3.7326	0.000189511	0.00600471	G1S
C9orf16	ENSG00000171159	357.844	0.648366	0.200865	3.22786	0.00124718	0.0317363	S
C9orf16	ENSG00000171159	209.411	0.67353	0.213348	3.15695	0.00159427	0.0498619	G2M
C9orf16	ENSG00000171159	230.955	0.75097	0.186259	4.03185	5.53397e-05	0.00304524	MG1
CAV2	ENSG00000105971	611.989	0.716597	0.177041	4.04762	5.17406e-05	0.00232021	G1S
CAV2	ENSG00000105971	264.363	0.895747	0.184608	4.85217	1.22119e-06	0.000146806	MG1
CCNC	ENSG00000112237	163.349	-0.802503	0.21697	-3.69869	0.000216717	0.00662461	G1S
CCNC	ENSG00000112237	28.6115	-1.14502	0.360434	-3.17677	0.00148926	0.0465168	G2
CDC25B	ENSG00000101224	158.081	0.915928	0.241506	3.79257	0.000149097	0.00518712	G1S
CLTB	ENSG00000175416	562.967	-0.660749	0.159903	-4.13218	3.59331e-05	0.00177467	G1S
CLTB	ENSG00000175416	290.31	-0.599946	0.186438	-3.21794	0.00129115	0.0324374	S
CLTB	ENSG00000175416	215.725	-0.667492	0.170888	-3.90603	9.38262e-05	0.00458224	MG1
CLUH	ENSG00000132361	70.1811	1.22965	0.30191	4.07291	4.64291e-05	0.00214026	G1S
CRBN	ENSG00000113851	88.1896	-1.17186	0.2583	-4.53681	5.71109e-06	0.000442228	G1S
CRBN	ENSG00000113851	26.6784	-1.24128	0.385523	-3.21972	0.00128315	0.0444505	G2M
DDX42	ENSG00000198231	116.331	0.708528	0.219162	3.23289	0.00122544	0.0226812	G1S
DYNC1LI1	ENSG00000144635	92.3987	-0.841788	0.250947	-3.35445	0.00079523	0.0172171	G1S
DYNC1LI1	ENSG00000144635	38.4556	-0.954813	0.312802	-3.05245	0.00226982	0.0426651	MG1
FBXL5	ENSG00000118564	41.3013	-1.00355	0.307761	-3.26082	0.00111089	0.0213659	G1S
GNPDA2	ENSG00000163281	35.5528	-1.07937	0.363316	-2.9709	0.00296932	0.042973	G1S
GOLGA2	ENSG00000167110	183.766	1.09879	0.247582	4.43807	9.07676e-06	0.000618378	G1S
GTPBP1	ENSG00000100226	44.8315	1.36187	0.371327	3.66757	0.000244869	0.0072371	G1S
HDAC7	ENSG00000061273	25.4049	1.10922	0.354147	3.13209	0.00173564	0.0365561	MG1
HMGA2	ENSG00000149948	466.803	0.7138	0.212827	3.3539	0.000796817	0.0172171	G1S
HMGA2	ENSG00000149948	227.618	0.586318	0.190392	3.07954	0.0020732	0.0422406	S
HMGA2	ENSG00000149948	109.028	0.862988	0.238304	3.62138	0.000293039	0.0154778	G2
HMGA2	ENSG00000149948	205.993	0.62186	0.177683	3.49982	0.000465568	0.0154979	MG1
HNRNPA2B1	ENSG00000122566	2380.77	-0.624845	0.190525	-3.2796	0.00103954	0.020547	G1S
HNRNPA2B1	ENSG00000122566	993.352	-0.583014	0.190213	-3.06505	0.00217632	0.0418861	MG1
IDNK	ENSG00000148057	21.9043	2.00402	0.624689	3.20804	0.00133645	0.0242454	G1S
LOXL3	ENSG00000115318	143.886	-1.49428	0.356046	-4.19688	2.70616e-05	0.00143965	G1S
LOXL3	ENSG00000115318	65.4533	-1.43139	0.474866	-3.01431	0.00257564	0.0471359	S
LOXL3	ENSG00000115318	46.9091	-1.62843	0.439823	-3.70247	0.000213509	0.00842604	MG1
LY6K	ENSG00000160886	103.409	1.09705	0.240759	4.55665	5.19749e-06	0.00041021	G1S
MGAT4B	ENSG00000161013	215.002	0.738827	0.201493	3.66676	0.000245642	0.0072371	G1S
MGAT4B	ENSG00000161013	60.5701	0.97265	0.298877	3.25435	0.00113653	0.0417865	G2M
NEXN	ENSG00000162614	339.535	-0.678595	0.208112	-3.26071	0.00111132	0.0213659	G1S
NEXN	ENSG00000162614	180.276	-0.852925	0.215441	-3.95897	7.52741e-05	0.00460905	S
NEXN	ENSG00000162614	59.9091	-1.08928	0.287687	-3.78634	0.000152884	0.00975251	G2
NEXN	ENSG00000162614	91.8226	-0.974485	0.259082	-3.76129	0.000169037	0.0137961	G2M
NEXN	ENSG00000162614	115.917	-0.799966	0.218589	-3.65968	0.000252529	0.00953266	MG1
NRG1	ENSG00000157168	90.6858	0.801323	0.263788	3.03776	0.00238346	0.036127	G1S
PATZ1	ENSG00000100105	28.5158	1.15468	0.395881	2.91673	0.00353721	0.0478906	G1S
PDCD5	ENSG00000105185	1258.5	-0.530691	0.169724	-3.1268	0.00176722	0.0292058	G1S
PDCD5	ENSG00000105185	538.59	-0.600709	0.197704	-3.03843	0.00237814	0.044035	MG1
PDE4DIP	ENSG00000178104	133.293	0.935639	0.215105	4.34968	1.36334e-05	0.000812172	G1S
PDE4DIP	ENSG00000178104	67.3068	0.872978	0.288549	3.0254	0.00248301	0.0461005	S
PDE4DIP	ENSG00000178104	31.492	1.38542	0.365969	3.78562	0.000153325	0.00975251	G2
PDE4DIP	ENSG00000178104	49.0375	0.998096	0.258543	3.86046	0.000113174	0.00532341	MG1
PDHB	ENSG00000168291	236.321	-1.05534	0.296989	-3.55345	0.00038021	0.00997894	G1S
PDHB	ENSG00000168291	104.597	-1.03772	0.341465	-3.03902	0.0023735	0.0448168	S
PDHB	ENSG00000168291	76.1456	-1.2349	0.273363	-4.51744	6.2593e-06	0.00121006	G2M
PDHB	ENSG00000168291	111.662	-0.919886	0.235172	-3.91154	9.17082e-05	0.00453549	MG1
PLAC9	ENSG00000189129	6.36897	-2.95332	0.832086	-3.5493	0.000386257	0.0100963	G1S
PLCE1-AS1	ENSG00000268894	10.291	-3.92947	0.756847	-5.1919	2.08159e-07	2.96233e-05	G1S
POLR3H	ENSG00000100413	340.709	0.722775	0.181625	3.97948	6.90652e-05	0.00287204	G1S
POLR3H	ENSG00000100413	144.942	0.94128	0.206438	4.55961	5.12478e-06	0.000471118	MG1
PPM1F	ENSG00000100034	86.7921	1.54082	0.284396	5.41787	6.03125e-08	1.19163e-05	G1S
PPM1F	ENSG00000100034	45.1232	1.31817	0.346894	3.79993	0.000144736	0.00715115	S
PPM1F	ENSG00000100034	35.9941	1.80657	0.339	5.32912	9.86894e-08	2.07226e-05	MG1
RAP1B	ENSG00000127314	311.343	-0.6771	0.185619	-3.6478	0.000264493	0.00759556	G1S
RAP1B	ENSG00000127314	111.355	-0.74415	0.214777	-3.46476	0.00053071	0.0274185	G2M
RPL31	ENSG00000071082	1734.48	0.432699	0.142711	3.032	0.00242935	0.044561	MG1
RPL7A	ENSG00000148303	8695.15	0.494241	0.166545	2.96762	0.00300113	0.043111	G1S
RPL7A	ENSG00000148303	4242.3	0.494835	0.163714	3.02256	0.00250649	0.046296	S
RPL7A	ENSG00000148303	3575.9	0.600736	0.135027	4.449	8.62696e-06	0.000732729	MG1
RPS19BP1	ENSG00000187051	1247.88	0.992263	0.177634	5.58599	2.32376e-08	5.51162e-06	G1S
RPS19BP1	ENSG00000187051	603.063	0.724306	0.189095	3.83039	0.000127943	0.00665415	S
RPS19BP1	ENSG00000187051	259.167	0.932301	0.219299	4.25127	2.12561e-05	0.00224925	G2
RPS19BP1	ENSG00000187051	449.156	0.67414	0.193055	3.49196	0.000479487	0.0261483	G2M
RPS19BP1	ENSG00000187051	509.719	0.99323	0.190002	5.22748	1.71836e-07	3.01984e-05	MG1
SMAD3	ENSG00000166949	92.4462	0.770244	0.251626	3.06107	0.00220547	0.0429975	S
SMDT1	ENSG00000183172	595.722	0.885022	0.214923	4.11786	3.82405e-05	0.0018623	G1S
SMDT1	ENSG00000183172	287.744	0.901329	0.247594	3.64035	0.000272263	0.0109813	S
SMDT1	ENSG00000183172	141.52	0.836115	0.246733	3.38874	0.000702149	0.0275806	G2
SMDT1	ENSG00000183172	224.842	0.988886	0.214141	4.61791	3.8762e-06	0.000382677	MG1
SPEG	ENSG00000072195	75.6693	1.38217	0.312621	4.42125	9.81337e-06	0.000651504	G1S
SPEG	ENSG00000072195	42.0965	1.2449	0.344487	3.61378	0.000301765	0.0116939	S
SPEG	ENSG00000072195	14.0366	1.66904	0.518056	3.22173	0.0012742	0.0415516	G2
SPEG	ENSG00000072195	24.9909	1.24523	0.393245	3.16656	0.00154255	0.0339535	MG1
SPHK1	ENSG00000176170	167.598	1.25757	0.279578	4.49811	6.85614e-06	0.000503758	G1S
SPHK1	ENSG00000176170	97.3603	1.10436	0.310811	3.55317	0.000380621	0.013677	S
SPHK1	ENSG00000176170	36.4706	1.706	0.375913	4.53829	5.67135e-06	0.00084017	G2
SPHK1	ENSG00000176170	48.5687	1.11222	0.345923	3.21523	0.00130342	0.044893	G2M
SPHK1	ENSG00000176170	63.6256	1.36098	0.302065	4.50557	6.61966e-06	0.000581191	MG1
SREBF1	ENSG00000072310	69.6051	0.984428	0.312493	3.15024	0.00163139	0.0276022	G1S
SREBF1	ENSG00000072310	43.0273	1.0436	0.342229	3.04941	0.00229288	0.0436699	S
SREBF1	ENSG00000072310	20.7021	1.62153	0.484696	3.34547	0.000821441	0.0356732	G2M
SUN2	ENSG00000100242	30.7704	1.11529	0.359437	3.10289	0.00191643	0.0390897	MG1
SVIL	ENSG00000197321	41.187	1.42514	0.380219	3.74821	0.000178103	0.0140444	G2M
THY1	ENSG00000154096	300.286	-9.71414	0.752993	-12.9007	4.4602e-38	5.71262e-34	G1S
THY1	ENSG00000154096	128.804	-10.5729	1.04664	-10.1018	5.42623e-24	3.21721e-20	S
THY1	ENSG00000154096	57.349	-9.14113	1.05247	-8.68539	3.77435e-18	1.957e-14	G2
THY1	ENSG00000154096	80.7137	-9.86817	1.04733	-9.42218	4.41807e-21	2.64775e-17	G2M
THY1	ENSG00000154096	113.394	-7.94393	0.848478	-9.36257	7.78203e-21	3.04044e-17	MG1
TMBIM1	ENSG00000135926	98.1381	1.2071	0.23574	5.12048	3.04767e-07	4.03184e-05	G1S
TMBIM1	ENSG00000135926	24.0084	1.32412	0.397715	3.32933	0.000870564	0.0320133	G2
TMBIM1	ENSG00000135926	35.6044	1.1442	0.303992	3.76392	0.000167271	0.00687922	MG1
TMED7	ENSG00000134970	31.3512	-1.13358	0.378769	-2.99279	0.00276437	0.0485411	MG1
TMEM147	ENSG00000105677	483.678	-0.699368	0.184027	-3.80035	0.00014449	0.00508414	G1S
TMEM147	ENSG00000105677	183.63	-0.728049	0.232088	-3.13695	0.00170714	0.036153	MG1
TNFRSF1A	ENSG00000067182	321.572	0.698864	0.177862	3.92925	8.52125e-05	0.00335816	G1S
TNFRSF1A	ENSG00000067182	154.78	0.871434	0.234355	3.71844	0.000200457	0.00867525	S
TXN2	ENSG00000100348	651.26	0.592692	0.185388	3.19703	0.00138848	0.024941	G1S
TXN2	ENSG00000100348	265.41	0.774656	0.163386	4.74125	2.124e-06	0.000227355	MG1
UBE2N	ENSG00000177889	360.532	-0.666081	0.213618	-3.1181	0.00182021	0.0297743	G1S
YWHAQ	ENSG00000134308	913.224	-0.856395	0.249937	-3.42644	0.000611544	0.0142671	G1S
YWHAQ	ENSG00000134308	429.983	-0.855593	0.237215	-3.60683	0.000309962	0.0119335	S
YWHAQ	ENSG00000134308	169.316	-0.911227	0.290512	-3.13662	0.00170905	0.0499733	G2
YWHAQ	ENSG00000134308	458.048	-0.642219	0.185547	-3.46123	0.000537723	0.0170112	MG1
